1     **Resistance to platinum chemotherapy in lung adenocarcinoma is driven by a**  
2                     **non-genetic, cell-cycle dependent mechanism**

3     Alvaro Gonzalez-Rajal<sup>1#</sup>, Rachael McCloy<sup>2</sup>, Max Nobis<sup>2,4</sup>, Kamila A Marzec<sup>1</sup>, Venessa Chin<sup>2,3,4</sup>,  
4     Jordan F. Hastings<sup>2</sup>, Kaitao Lai<sup>1,5</sup>, Marina Kennerson<sup>1,5</sup>, Vijesh Vaghjiani<sup>6</sup>, William E Hughes<sup>2</sup>,  
5     Paul Timpson<sup>2,4</sup>, Jason Cain<sup>6,7</sup>, D. Neil Watkins<sup>8,9</sup>, David R. Croucher<sup>2,4#</sup> and Andrew  
6                     Burgess<sup>1,5#</sup>

7     <sup>1</sup> ANZAC Research Institute, Concord, NSW 2139, Australia

8     <sup>2</sup> The Kinghorn Cancer Centre, Garvan Institute of Medical Research, Sydney, NSW 2010, Australia.

9     <sup>3</sup> St Vincent's Hospital Sydney, Darlinghurst, NSW 2010, Australia

10    <sup>4</sup> St Vincent's Hospital Clinical School, University of New South Wales, Sydney, NSW 2052, Australia.

11    <sup>5</sup> The University of Sydney Concord Clinical School, Faculty of Medicine and Health, Sydney, NSW 2139,  
12    Australia

13    <sup>6</sup> Hudson Institute of Medical Research, Clayton, Victoria 3168, Australia.

14    <sup>7</sup> Department of Molecular and Translational Medicine, School of Medicine, Nursing and Health Sciences,  
15    Monash University, Clayton, Victoria 3800, Australia

16    <sup>8</sup> Research Institute in Oncology and Hematology, CancerCare Manitoba, Winnipeg, MB, Canada, R3E-0V9

17    <sup>9</sup> Department of Internal Medicine, Rady Faculty of Health Science, University of Manitoba, Winnipeg, Canada,  
18    R3E 0W2

19    **Running Title:** Cell cycle dependent platinum resistance.

20    **Keywords:** 53BP1, PARP1, BRCA1, HR, ATR, PCNA, mitosis, DSB, NHEJ

21

22    **Corresponding Authors:**

23    Dr Alvaro Gonzalez-Rajal

24    Email: [alvaro.gonzalezrajal@sydney.edu.au](mailto:alvaro.gonzalezrajal@sydney.edu.au)

25

26    A/Prof David Croucher

27    Email: [d.croucher@garvan.org.au](mailto:d.croucher@garvan.org.au)

28

29    A/Prof Andrew Burgess

30    Email: [andrew.burgess@sydney.edu.au](mailto:andrew.burgess@sydney.edu.au)

31

32

33

34

35

36 **Abstract:**

37 Innate resistance to platinum-based chemotherapies has significantly reduced their impact  
38 in lung adenocarcinoma. We previously used a pulse-based *in vitro* assay to unveil  
39 targetable signalling pathways associated with this resistant phenotype (Hastings et al.,  
40 2020). Here we advanced this model system and identify a non-genetic mechanism of  
41 resistance that drives recovery and regrowth in a subset of cells. Using RNAseq and a suite  
42 of biosensors to track single cell fates both *in vitro* and *in vivo*, we identified that early S  
43 phase cells have a greater capacity to repair damage over multiple generations. In contrast,  
44 cells in G1, late S or those treated with PARP inhibitors, were unable to sufficiently repair  
45 the damage and underwent prolonged S/G2 phase arrest and senescence. These data  
46 indicate that there is a fundamental non-genetic mechanism of resistance in lung  
47 adenocarcinoma that is dependent on the cell cycle stage at the time of cisplatin exposure.

48  
49 **Introduction:**

50 Lung adenocarcinoma (LUAD) is the most common form of lung cancer and the leading  
51 cause of cancer-related death in Australia. Less than 15% of patients have a targetable  
52 driver mutation and therefore cannot benefit from targeted therapy (Herbst et al., 2018).  
53 Consequently, the overwhelming majority of LUAD patients receive platinum-based  
54 chemotherapy as standard of care. The anti-tumour abilities of platinum compounds were  
55 first identified over 50 years ago with the discovery of cisplatin (Kelland, 2007). Since then,  
56 cisplatin and its derivatives have become one of the most successful groups of  
57 chemotherapeutics ever developed. Platinum therapy is essentially curative in testicular  
58 cancer, with survival rates >90%, and is also a frontline treatment for small-cell lung cancer,  
59 ovarian, head and neck, bladder, and cervical cancers (Kelland, 2007; Gonzalez-Rajal et al.,  
60 2020). Unfortunately, response rates to platinum in LUAD are below 30%, due mainly to  
61 innate resistance (Herbst et al., 2018). Nearly 150 different mechanisms of platinum  
62 resistance have been identified to date (Stewart, 2007). The vast majority of these  
63 mechanisms have been derived from preclinical models that utilise continuous, high dose  
64 exposure models, well above what is physiologically achievable in patients. Unsurprisingly,  
65 the majority of these models have failed to translate into improved clinical outcomes. To  
66 overcome this, we recently demonstrated that analysis of an *in vitro* assay that accurately  
67 models the *in vivo* drug exposure kinetics for cisplatin, could provide therapeutically

68 relevant insights into the signalling dynamics associated with innate resistance (Hastings et  
69 al., 2020). Cisplatin is given to patients as a single bolus dose, reaching a peak plasma  
70 concentration of ~14  $\mu$ M, which is then rapidly cleared by the kidneys within 2-4 h  
71 (Andersson et al., 1996; Urien and Lokiec, 2004). We therefore mimicked this *in vitro* by  
72 pulsing cells for 2 h with the maximum plasma concentration (Hastings et al., 2020).

73

74 Once inside cells, platinum compounds can bind to DNA, RNA, and proteins (Gonzalez-Rajal  
75 et al., 2020), however the binding to DNA, which forms platinum-DNA adducts, are thought  
76 to be the primary mechanism for their tumour-specific killing. Intra-strand DNA-platinum  
77 adducts are repaired by base-excision and nucleotide excision repair during G1 (Slyskova et  
78 al., 2018). Inter-strand crosslinks (ICL) are removed largely by the Fanconi anemia (FA)  
79 pathway (Smogorzewska, 2019), which generates single and double strand breaks that are  
80 resolved by either the high-fidelity homologous recombination (HR) pathway during S-phase  
81 (Karanam et al., 2012) or by the error-prone non-homologous end joining (NHEJ) pathway  
82 during G1 and G2 phase (Enoiu et al., 2012; Slyskova et al., 2018). Consequently, targeting  
83 DNA repair pathways has become a major focus for enhancing platinum chemotherapies.  
84 For example, cells with defective HR repair have been shown to be highly sensitivity to  
85 combination therapy with cisplatin and PARP inhibitors in a number of cancer types  
86 including ovarian and breast (Tutt et al., 2018). However, correlation between cisplatin  
87 sensitivity and impaired DNA repair has often failed to translate clinically in LUAD (Mamdani  
88 and Jalal, 2016). In contrast, we have recently identified TGF- $\beta$  (Marini et al., 2018) and  
89 P70S6K (Hastings et al., 2020) as key mediators of innate platinum resistance in LUAD. We  
90 now build upon these previous results and identify in this research advance that a sub-  
91 population of cells that are capable of continued proliferation despite exposure to pulsed  
92 cisplatin. Using a combination of cell cycle, DNA damage and replication biosensors  
93 combined with real-time single-cell fate tracking, we identified that these proliferative cells  
94 were enriched in late G1/early S phase at the time of cisplatin exposure and were able to  
95 sufficiently repair their DNA over multiple generations and rounds of replication. These  
96 results increase our understanding of the complexities underlying non-genetic resistance  
97 and recovery mechanisms in LUAD, while also highlighting mechanistic issues with a number  
98 of current clinical trials focused on combination therapy with cisplatin.

99

## 100 **Results**

### 101 ***Cells remain equally sensitive upon re-exposure to pulsed cisplatin.***

102 In our previous work (Hastings et al., 2020), we identified several targetable signalling  
103 pathways that were associated with resistance to cisplatin in lung adenocarcinoma cells. In  
104 this work, our goal was to analyse the innate mechanisms that enable cell survival after  
105 exposure to cisplatin. To assess this, we analysed how cells respond to a subsequent dose of  
106 cisplatin, following recovery from an initial exposure event. To do this, we pulsed cells with  
107 cisplatin (5 µg/ml) and followed their response by time-lapse imaging. Cells were allowed to  
108 recover for 21-42 days (depending on their base rate of proliferation), before being  
109 challenged again with cisplatin, which equates to the approximate time patients normally  
110 receive a second dose in the clinic (Figure 1A). We utilised 3 LUAD cell lines: A549 (wild-type  
111 p53), NCI-H1573 (p53<sup>R248L</sup> mutant) and NCI-1299 (p53 null), which were all engineered to  
112 stably express Histone H2B fused to mCherry, allowing real-time quantitation of cell number  
113 and nuclear size. The initial pulse of cisplatin blocked the proliferation of A549 and  
114 NCIH1573 cells, and significantly reduced NCI-H1299 cell numbers over a 3-day period. This  
115 was mirrored in colony formation assays, with both A549 and NCI-1573 showing strong  
116 suppression of colony outgrowth, while p53-null H1299 cells were impacted to a lesser  
117 degree (Supplementary Figure S1A). Interestingly, there was a less noticeable effect on cell  
118 confluence (Figure 1B). Subsequent visual and quantitative analysis of cells by  
119 immunofluorescence revealed a corresponding 2 to 6-fold increase in total cell and nuclear  
120 area across all three cell lines (Figure 1C,D), accounting for the reduced impact on  
121 confluence. Following 21 days of recovery (42 days for NCI-H1573 due to slower rate of  
122 proliferation), cells appeared to return to their pre-pulse size (Figure 1C,D), with a  
123 subsequent cisplatin pulse resulting in a near identical response to the initial pulse, both in  
124 terms of inhibition of cell number, reduced confluence and increased cell size (Figure 1B-D).  
125 Based on these results, and our previous observation that all cells contained significantly  
126 increased levels of cisplatin-DNA adducts (Hastings et al., 2020), we concluded that cells  
127 surviving the first exposure remained equally sensitive to cisplatin and were therefore  
128 unlikely to have acquired resistance or arisen from an intrinsically resistant sub-clonal  
129 population within each cell line.

130

131 To assess this, we analysed the variability of cell and nuclear size after the initial pulse of  
132 cisplatin at 3-7 days post exposure. Visual analysis identified several colonies of cells whose  
133 size was similar to that of untreated control cells (Figure 2A). We hypothesised that these  
134 cells were able to proliferate and outgrow the non-proliferative (arrested) cells over the 21-  
135 42 day period. In support, a significant increase in senescence associated Beta-galactosidase  
136 ( $\beta$ -gal) staining was observed in A549 and to a lesser extent H1573 and H1299 cell lines  
137 (Figure 2 -Supplement 1B). Similarly, increased levels of the cyclin dependent kinase  
138 inhibitors p16 and p21, and increased senescence associated  $\beta$ -gal, were associated with  
139 larger cells across all 3 cell lines (Figure 2 -Supplement 1C), further indicating that larger  
140 cells have a lower proliferative capacity and are likely senescent. To test whether the  
141 surviving population arose from a subset of proliferating cells, we utilised the LeGo RGB  
142 colour-guided clonal cell tracking system (Weber et al., 2011). Briefly, each cell line was co-  
143 transfected with 3 different lentiviral vectors containing either a red, green or blue  
144 fluorescent protein. Each cell randomly received a variable amount of each plasmid  
145 resulting in a unique colour code for each cell. Quantitative colour analysis of untreated  
146 control cells revealed that up to 64 unique colours could be detected in each cell line. After  
147 pulsed exposure to cisplatin, single colour colony outgrowths were clearly visible in all 3 cell  
148 lines at 3-7 days post exposure, which was maintained at 21 or 42-days (Figure 2C). Taken  
149 together these results indicate that only a few colonies were responsible for repopulating  
150 the culture after the initial pulse exposure.

151

152 To confirm these results *in vivo*, we injected A549 or NCI-H1299 cells subcutaneously into  
153 the flanks of nude mice and allowed establishment of tumours (150 mm<sup>3</sup>) before  
154 administering a single treatment of carboplatin (60 mg/kg). Mice harvested at 3 days post  
155 treatment were analysed by IHC for cell size and PCNA positive staining, with both cell lines  
156 showing a significant increase in cell size (Figure 3A, B). Similar to the *in vitro* results, active  
157 proliferation (PCNA positivity) in A549 cells was strongly suppressed after carboplatin  
158 exposure, indicating that the majority of cells were not proliferating. In contrast, H1299  
159 cells, which lack p53 and only show mild reductions in proliferation *in vitro* (Figure 1B), did  
160 not show any significant decrease in PCNA staining *in vivo* (Figure 3A,B), but did significantly  
161 increase in cell size, closely matching results observed *in vitro*. In summary, these *in vitro*  
162 and *in vivo* data indicate that the majority of LUAD cells, especially those with functional

163 p53, become large and non-proliferative after pulsed treatment with cisplatin. Interestingly,  
164 a sub-population of cells remain at normal size, maintain their proliferative capacity, drive  
165 repopulation of the cell culture, and yet remain equally sensitive to successive cisplatin  
166 treatment, indicating a non-genetic mechanism of resistance.

167

### 168 ***Differential RNAseq analysis of cisplatin treated sub-populations***

169 To better understand the potential mechanism driving the difference between cells that  
170 become large and senescent compared to those that maintain proliferative capacity, we  
171 performed RNAseq analysis on each unique population. Briefly, A549 cells were pulsed with  
172 cisplatin, harvested at 72 h and sorted by cell size using forward and side scatter parameters  
173 (FSC, SSC), with pre- and post-sorted cells then processed for RNAseq analysis (Figure 4A, B).  
174 Two-way hierarchical clustering indicated that there were clear differences between  
175 proliferative cisplatin treated cells compared to untreated control and non-proliferative  
176 cisplatin treated cells (Figure 4C). To better understand these effects, we undertook more  
177 detailed bioinformatic analysis using Ingenuity Pathway Analysis (IPA). Strong upregulation  
178 of the CDK inhibitor p21, was present in both pre-sorted cisplatin treated and post-sorted  
179 non-proliferative cells, matching the early flow data (Figure 2 Supplement 1C, Supplement  
180 Table 1,2). This corresponded with upregulation of p53, CHK and G2/M cell cycle checkpoint  
181 signalling, and a reduction in DNA replication and increase in senescence (Figure 4D, E),  
182 correlating with the increased  $\beta$ -gal and reduced proliferation observed above (Figure 2  
183 Supplement 1B and Figure 1B). Importantly, proliferative cisplatin treated cells were  
184 significantly different from untreated controls, confirming our previous observation that  
185 that they were not simply cells that had avoided cisplatin exposure (Hastings et al., 2020).  
186 Notably, these proliferative cells displayed a decrease in EIF2, mTOR and p70S6K signalling,  
187 with a corresponding increase in TREM1, GP6 and IL-17F signalling pathways (Figure 4F,  
188 Supplement Table 3,4). Four-way comparative analysis further highlighted key differences  
189 between each sub-population, with proliferative cells all showing strong upregulation of  
190 BRCA1, ATM and DNA replication signalling pathways, which were heavily suppressed in  
191 non-proliferative cells (Figure 4G). Similarly, Gene Set Enrichment Analysis (GSEA), identified  
192 strong enrichment for cell cycle, HR directed repair, ATR and the Fanconi pathway in  
193 proliferative compared to arrested cells (Figure 4 Supplement 1A,B). In summary, these data  
194 suggest that the proliferative cells are considerably different from untreated control and

195 non-proliferative cells. Specifically, proliferative cells do not undergo significant p53/p21  
196 dependent cell cycle checkpoint arrest but do show prominent upregulation of DNA repair  
197 pathways involving HR/BRCA1 and ATM/ATR.

198

### 199 ***Cell cycle status at time of exposure correlates with cell fate outcomes***

200 The above RNAseq data indicated that there were strong cell cycle dependent differences  
201 between proliferative and non-proliferative cisplatin treated cells. To better understand  
202 these differences, we re-utilised the FUCCI biosensor system to enable real-time cell cycle  
203 status of individual cells (Hastings et al., 2020). Briefly, asynchronous A549 cells stably  
204 expressing FUCCI, were pulsed with or without cisplatin and then followed by time-lapse  
205 microscopy for 72 h. Individual cells were manually tracked and scored for cell cycle status  
206 and cell fate as previously described (Caldon and Burgess, 2019; Hastings et al., 2020). The  
207 majority of control cells divided at least 2 times within the 72 h time period (Figure 5  
208 Supplement 1A,B). In contrast, cisplatin treated cells showed a range of cell cycle  
209 perturbations (Figure 5 Supplement 1A,C), including a significant and prolonged S/G2 phase  
210 arrest (Figure 5 Supplement 1D), which correlated with a reduced number of total divisions.  
211 However, as predicted by the LeGo and RNAseq data, there was a sub-population of cells  
212 that were able to undergo multiple (2 or more) divisions within the 72 h period, despite  
213 treatment with cisplatin. Interestingly, this population was enriched for cells in late G1 and  
214 early S-phase at the time of cisplatin exposure (Figure 5 Supplement 1A-D). This suggests  
215 that there is a cell cycle dependent mechanism driving the ability of cells to continue to  
216 proliferate after cisplatin exposure. To assess this in greater detail, we synchronised cells in  
217 either G1 or early S phase using either Palbociclib or thymidine, respectively (Figure 5A,B).  
218 Cells were then pulsed with cisplatin at various points following release to target G1, early  
219 or late S phase and then monitored by time lapse microscopy. Treatment of cells in G1  
220 (Palbo + Cis at 0h) resulted in the majority of cells undergoing a prolonged S/G2 phase and  
221 then exiting back into a G1 like state without undergoing mitosis (G2-exit; Figure 5C), a state  
222 we described previously (Hastings et al., 2020). Notably, only 7/50 cells completed a single  
223 division and no cells underwent multiple (2 or more) divisions during the 72 h time period  
224 (Figure 5A,D). In contrast, treatment during late G1 (Palbo + Cis at 6h) and early S phase  
225 (Thy + Cis at -2h) resulted in significantly more cells (13/50 and 16/50 respectively)  
226 completing 2 or more divisions (Figure 5A-D). Finally, nearly all cells treated in late S phase

227 (Thy + Cis at 4h), completed the first mitosis and then underwent prolonged S/G2 arrest and  
228 G2-exit, with only 4 out of 50 cells completing 2 divisions within the 72 h period (Figure 5B-  
229 D). To validate these results *in vivo*, we implanted A549-FUCCI cells under optical windows  
230 in mice (Figure 5E). Tumours were allowed to establish before mice were given a single dose  
231 of carboplatin. Individual mice were then repeatedly imaged over 7 days post treatment.  
232 Notably, prior to cisplatin treatment, approximately 80% of cells were in G1 phase (Figure  
233 5F-G). Similar to *in vitro* results, we observed a notable increase in S/G2 phase cells at day 1,  
234 indicating that cells were arrested in S/G2. This increase reduced from day 3 onwards, with  
235 over 90% of cells in a G1 like state at 7-days post treatment (Figure 5F-G). Taken together,  
236 these results indicate that cells in late G1 early S phase are capable of undergoing multiple  
237 cell cycle divisions, while cells in G1 or late S/G2 undergo prolonged S/G2 arrest and G2-exit  
238 both *in vitro* and *in vivo*.

239

#### 240 ***Disruption of DNA repair reduces ability of early S phase cells to proliferate***

241 The above data indicates that cells in late G1/early S phase at the time of cisplatin exposure  
242 are transiently resistant to cisplatin. A major target of cisplatin is DNA replication, with intra  
243 and inter-strand cross-links disrupting DNA replication, leading to stalled replication forks  
244 and the formation of double-strand breaks (Gonzalez-Rajal et al., 2020). We therefore  
245 hypothesised that cells in late G1/early S phase were able to repair cisplatin induced DNA  
246 damage during the first cell cycle more efficiently than cells in G1 or late S phase, thereby  
247 allowing them to continue to proliferate. To test this, we engineered A549 cells to stably co-  
248 express a truncated form of 53BP1 fused to mApple (Apple-53BP1trunc), which has  
249 previously been shown to bind double strand break sites co-marked with  $\gamma$ H2A.X but lacks  
250 any of the functional domains of 53BP1 (Yang et al., 2015). We combined this with a PCNA  
251 Chromobody (Burgess et al., 2012) where we replaced GFP with mNeonGreen, to mark sites  
252 of active DNA replication (Figure 6A, inset). Cells were synchronised in early S phase with  
253 thymidine (as per Figure 5B), and then tracked by 4D-live cell imaging. Individual cells were  
254 divided into either those in G1, early-S or mid/late-S based on the pattern of PCNA foci  
255 (cyan), and then tracked through time. In control cells, a small number (<20) of 53BP1  
256 positive foci (red hot) were observed as cells underwent the first round of replication  
257 (Figure 6A,B). Daughter and grand-daughter cells then displayed several (<5) large foci  
258 during G1 (up to 5  $\mu\text{m}^2$ ), which were resolved as cells entered S-phase and began replicating



259 (Figure 6C, white arrow). Cells that were in G1 at the time of cisplatin exposure, entered S-  
260 phase and rapidly accumulated a large number (~100) of 53BP1 positive foci, these slowly  
261 reduced over the remainder of the time-lapse (Figure 6A-C), which corresponded with an  
262 increase in the average size of the foci (~1  $\mu\text{m}^2$ ). In contrast, cells that were in early S-phase  
263 that completed multiple (2 or more) divisions within the 72 h timeframe, showed a rapid  
264 rise in foci number (~100), which then decreased at the conclusion of S phase, correlating  
265 with an increase in foci size. A small number of larger foci were present in the following G1  
266 cell, although the size of these foci was smaller than those observed in control daughter  
267 cells (~1  $\mu\text{m}^2$ ). Interestingly, in grand-daughter and great grand-daughter cells, the size of  
268 G1 foci increased (>2  $\mu\text{m}^2$ ), in-line with G1 foci observed in control cells (Figure 6A-C, Figure  
269 6 Supplement 1A). Finally, cells in mid-late S phase, also showed a large number of 53BP1  
270 foci, which increased in size as cells progressed through the first G2 phase. Interestingly, the  
271 average number of 53BP1 foci were higher and were removed later, just prior to mitotic  
272 entry compared to cells from early S-phase (Figure 6A-C, Figure 6 Supplement 1B).  
273 Furthermore, the quality of mitosis was often reduced in cells from mid-S phase, with cells  
274 often presenting with chromatin bridges, micronuclei and/or failed cytokinesis (Figure 6  
275 Supplement 1C), correlating with the increase in death during or after mitosis we observed  
276 previously (Figure 5C). The subsequent daughter cells from those exposed in mid-S phase  
277 then showed a rapid rise in the number of foci (>100) as they began replication. In contrast,  
278 the number of 53BP1 foci in early S-phase cells only increased mildly during replication and  
279 was notably lower than the numbers observed in the first round of replication (Figure 6  
280 Supplement 1A,B). Based on these results, we concluded that early-S phase cells were able  
281 to either partially repair double strand breaks during the first round of DNA replication,  
282 and/or mark damage for efficient repair in the subsequent daughter and grand-daughter  
283 cells. In contrast, cells in G1 had much greater levels of damage and remained arrested in  
284 the first G2 phase. Cells in mid/late S phase completed the first division while acquiring  
285 damage but were unable to sufficiently repair the damage before mitosis. Consequently,  
286 daughter cells had un-repaired damage increased rates of mitotic induced breaks as they  
287 attempted the second round of DNA replication, leading to a strong S/G2 phase checkpoint  
288 arrest, similar to cells initially exposed during G1.

289

290 Based on these results, we hypothesised that cells in early-S phase were better able to take  
291 advantage of the high-fidelity homologous recombination (HR) pathway as replication forks  
292 encountered cisplatin adducts compared to G1 or late S phase. To test this, we utilised the  
293 PARP inhibitor, olaparib, to trap PARP at SSB sites, leading to increased rates of replication  
294 fork stalling and reduced capacity to repair DSBs by HR (Murai and Pommier, 2018). We  
295 hypothesised that this would increase the rate of damage in all cells and reduce the ability  
296 of early-S phase cells to repair during the first cell cycle. To test this, A549 FUCCI cells were  
297 synchronised in G1 or early S phase with Palbociclib or thymidine, as previously described  
298 (Figure 5A,B). Cells were then treated with or without Olaparib (PARPi) for 1 h prior to  
299 pulsed cisplatin exposure and monitored by time lapse microscopy (Figure 7A). In cells  
300 treated with cisplatin, co-treatment with PARPi significantly reduced the total number of  
301 divisions (Figure 7B), indicating that cells were unable to continue proliferating. This  
302 correlated with a trend toward a longer G1 phase in daughter cells in Palbociclib  
303 synchronised cells, and a highly significant G1 delay in thymidine synchronised cells (Figure  
304 7C). Interestingly, although co-treatment with PARPi decreased the number of proliferative  
305 (2 or more divisions) cells there was only a small increase in death observed (Figure 7D),  
306 indicating that PARPi alone is not sufficient to drive increased toxicity to cisplatin in A549  
307 cells. Importantly, inhibition of PARP did increase the rate of 53BP1 foci formation  
308 compared to cisplatin alone in asynchronous cells (Figure 7E). Furthermore, this correlated  
309 with a significant increase in both the amount of  $\gamma$ -H2AX staining and the size of cells (Figure  
310 7F), indicating that PARPi was preventing efficient repair during the first replication cycle  
311 resulting in an increased rate of DNA damage and more pronounced S/G2 cell cycle  
312 checkpoint arrest.

313

#### 314 **Discussion:**

315 In this work, we have identified a novel, non-genetic mechanism of resistance to platinum  
316 chemotherapy, which facilitates continued proliferation in a subset of cells after pulsed  
317 exposure to cisplatin. These cells eventually outgrow the majority of arrested cells over the  
318 course of 3 weeks *in vitro*. However, upon re-exposure, they remained equally sensitive,  
319 indicating that the mechanism of resistance is not hard-wired, nor did cells acquire  
320 resistance after the first exposure. Identification of these cells was largely dependent on the  
321 use of long-term quantitative single cell fate tracking (Caldon and Burgess, 2019), combined

322 with the use of a pulsed exposure model that closely mimics the *in vivo* kinetics of cisplatin  
323 in patients (Hastings et al., 2020). Tracing of individual cells that maintained proliferative  
324 capacity after pulsed cisplatin exposure, revealed a strong bias towards cells that were in  
325 late G1/early S phase at the time of exposure. In contrast, cells that were in early G1  
326 arrested in S/G2 during the first replication cycle and underwent a G2-exit/senescent-like  
327 state. Notably, intracellular pH is lowest during G1, and cisplatin DNA binding is markedly  
328 increased in acidic conditions (Stewart, 2007), hence G1 phase cells likely have higher levels  
329 of cisplatin-DNA adducts, potentially explaining why these cells are unable to sufficiently  
330 repair and continue proliferating. In contrast, cells in mid-late S, G2 or M phase, proceed  
331 through the first division, attempt a second round of replication where they encounter  
332 higher levels of DNA damage, resulting in subsequent S/G2 phase arrest (Figure 8). Finally,  
333 cells in early S phase showed marked levels of double strand breaks during the first round of  
334 replication, however, the level of damage in daughter cells was significantly lower and  
335 returned to control levels in grand-daughter cells, explaining why these cells remained  
336 proliferative. Notably, had a continuous exposure model been used, cells in late G1/early S  
337 phase would have sustained cisplatin damage during all subsequent cell cycle stages, likely  
338 preventing the outgrowth of these clones, highlighting the importance of using *in vitro*  
339 systems that better reflect the *in vivo* pharmacokinetics of the chemotherapy.

340

341 The vast majority of cells both *in vitro* and *in vivo* are in G1 (>70%) or S-G2-M (~20%) at any  
342 given time, and hence the primary phenotype observed was that cells underwent prominent  
343 arrest and G2-exit during the first replication cycle. Conversely, the percentage of cells in  
344 late-G1/early S-phase is ~5-10%, which closely matches the low number of clones that  
345 continued to proliferate and repopulate the culture. Importantly, the ability of cells to  
346 maintain proliferative capacity was likely a function of the quality of repair and division,  
347 which in turn is dependent on the genetic background of each cell. In this regard the major  
348 cell cycle checkpoint response genes, such as p53, ATR and BRCA1/2 play important roles in  
349 determining how well cells respond to cisplatin exposure (Gonzalez-Rajal et al., 2020). For  
350 example, G1 treated A549 cells, which contain wild type p53, were able to instigate a strong  
351 p53 checkpoint response resulting in downstream upregulation of p21. This correlated with  
352 cells attempting to replicate their DNA, and a subsequent increase in 53BP1 positive foci  
353 indicating wide-spread induction of double strand breaks. Sustained p21 expression has

354 previously been linked to prolonged S/G2 phase arrest resulting in a G2-exit and  
355 senescence-like state in S/G2 (Baus et al., 2003). This decision is dictated at the individual  
356 cell level by the amount of DNA-damage and progress of repair. If damage is too great, then  
357 ATR-mediated checkpoint signalling results in sustained p21 expression, blocking CDK  
358 activity and preventing FOXM1 dependent G2 transcription required for mitotic entry  
359 (Saldivar et al., 2018). Notably the level of p21 induction observed in individual cells has  
360 been proposed to play a major role in determining if cells arrest, repair or continue cycling  
361 (Barr et al., 2017). Three major patterns of p21 expression have been observed after  
362 exposure to various chemotherapy treatments (Hsu et al., 2019). Surprisingly, cells that  
363 induce intermediate levels of p21 were more likely to maintain proliferative capacity, while  
364 those with initially low or high levels were more likely to become senescent. These states  
365 likely match the three major phenotypes we observed here, with G1 cells likely containing  
366 initially low levels of p21 that then rise after cells attempt DNA replication and repair, with  
367 cells in S-G2/M and early S-phase corresponding to high and intermediate levels,  
368 respectively. In support, we observed that cells in early S-phase have an initial wave of  
369 53BP1 foci as they progress through S-phase, however daughter and grand-daughter cells  
370 showed far reduced levels. In contrast, daughter cells from those in S/G2 phase at the time  
371 of exposure showed heightened levels of damage. One possible explanation for this is that  
372 cells in S/G2 have already replicated large parts of their DNA when exposed, and hence  
373 these adducts may not be efficiently detected or repaired until after mitosis and the  
374 daughter cells undergo DNA replication (Figure 8). In contrast, early-S phase cells would  
375 encounter cisplatin adducts during the first replication cycle, initiate repair, most likely using  
376 homologous recombination, which is highest when cells are actively replicating during mid-S  
377 phase (Karanam et al., 2012). In contrast, error-prone NHEJ, which is preferred during G1  
378 and G2, is likely favoured by cells exposed during G1 and late S-phase (Karanam et al.,  
379 2012). In support, proliferative cells were enriched for HR associated BRCA1-mediated  
380 signalling pathways compared to arrested cells. Interestingly, the first G2 phase was  
381 significantly longer in cells treated within mid/late S phase, suggesting some level of G2-  
382 checkpoint response and possible repair. However, cells eventually entered and progressed  
383 through an undelayed mitosis although numerous chromatin bridges were observed  
384 between separating daughter cells, which correlated with increased rates of mitotic and  
385 post-mitotic death. Chromatin bridges are often indicative of decatenation failure and

386 increased replication stress (Sarlós et al., 2017), which can lead to increased rates of cell  
387 death during or post mitotic division (Hayashi and Karlseder, 2013; Burgess et al., 2014).  
388 Notably, ultra-fine chromatin bridges (UFBs) are commonly formed after DNA damage  
389 caused by chemotherapies such as cisplatin. These can be repaired by homologous  
390 recombination, but if the repair is not completed before mitosis, then HR-intermediates  
391 result in the formation of UFBs (Chan et al., 2017; Chan and West, 2018). Consequently,  
392 cells exposed during early S-phase may have more time and capacity to avoid HR-UFBs  
393 during mitosis compared to those treated later in S-phase. In support, we observed delayed  
394 decrease in the rate of 53BP1 foci in mid/late S phase treated cells. While cells in early S-  
395 phase showed reduced levels of DNA damage (53BP1 positive foci) during second and third  
396 rounds of replication. Importantly, blocking and trapping PARP at sites of repair reduced the  
397 ability of cells to continue to proliferate, likely by disrupting HR-mediated repair during the  
398 first S phase. Taken together, this indicates that daughters of early S-phase treated cells  
399 have much lower levels of replication stress due to more efficient HR-mediated repair of  
400 cisplatin adducts during the first round of replication. Furthermore, post-mitotic G1 phase  
401 53BP1 nuclear bodies increased in size from daughter to grand-daughter cells, indicating  
402 increasing efficiency in identification and corralling of unrepaired DNA damage during each  
403 replication cycle. These G1 53BP1 nuclear bodies prevent daughter cells from encountering  
404 damaged DNA during replication (Watt et al., 2020), thereby avoiding deleterious fork  
405 stalling. For under-replicated DNA, this provides the cell with a second chance at repair  
406 (Spies et al., 2019), and is likely the case for early S-phase cisplatin treated cells. The partial  
407 repair in the first cell cycle also likely ensures reduced p21 levels in subsequent cycles,  
408 helping promote continued proliferation. Notably, we previously demonstrated that in p53  
409 mutant and null cells, p21 upregulation is compromised (Hastings et al., 2020), thereby  
410 impacting the ability of cisplatin to induce senescence in these cell lines. Interestingly, as  
411 observed in our previous paper, while p21/p53 are essential for determining cell cycle  
412 checkpoint response, they do not necessarily correlate with subsequent induction of  
413 apoptosis/cell death in LUAD cell lines. However, inhibition or knockdown of P70S6K did  
414 increase toxicity during this first division cycle (before mitosis), likely by reducing the  
415 threshold required to trigger cell death (Hastings et al., 2020). This potentially explains why  
416 co-inhibition of PARP - while preventing DNA repair, increasing the rate of DNA damage and  
417 reducing the ability of early S-phase cells to proliferate - was not able to enhance cisplatin

418 toxicity in A549 cells, due to high levels of P70S6K, which raise the death threshold in this  
419 cell line. Similarly, this work also indicates the potential for complications when co-  
420 administering platinum chemotherapies with Palbociclib. Specifically, pre or co-  
421 administration of Palbociclib with platinum may inadvertently synchronise cells in late  
422 G1/early S phase, resulting in a higher proportion of cells repairing the damage during the  
423 first cell cycle and maintaining proliferative capacity. In support, current clinical trials in  
424 head and neck cancer where both agents were given at the same time have resulted in no  
425 improvement to cisplatin therapy and resulted in significant treatment related toxicity  
426 (Swiecicki et al., 2020). Conversely, administering Palbociclib after cisplatin (and other  
427 chemotherapies), improves response and notably represses HR-dependent DNA repair  
428 (Salvador-Barbero et al., 2020). In summary, this work increases the understanding of the  
429 mechanisms driving recovery from cisplatin treatment and identifies the need for novel  
430 combination therapies that not only enhance cell death, but also prevent non-genetic, cell  
431 cycle dependent resistance mechanisms.

432

433

#### 434 **Materials and Methods:**

##### 435 ***Antibodies, Plasmids, and Reagents***

436 The  $\gamma$ H2A.X (S139)(AB26350), P16 (AB201980) and PCNA (AB29) antibodies were from  
437 Abcam (MA, USA). P21 antibody (2947) was purchased from Cell Signal Technology (MA,  
438 USA). Alexa-647 Conjugated Phalloidin antibody was purchased from ThermoFisher  
439 Scientific (A22287). The plasmids for Fucci live cell imaging, mVenus-hGeminin(1/110) and  
440 mCherry-hCdt1(30/120), were a kind gift from Dr Atsushi Miyawaki (Riken, Japan). The LeGO  
441 plasmids were obtained from Addgene (#27338, #27339, #27340) (Weber et al., 2008).  
442 Thymidine (S4803), Olaparib (S1060), Palbociclib (S1116) were from Selleck Chem (MA,  
443 USA). Deoxycytidine (sc-231247) was from Santa Cruz Biotechnology (TX, USA).

444

##### 445 ***Cell lines***

446 All lung adenocarcinoma cell (LUAD) lines have been previously described (Marini et al.,  
447 2018). The lines were cultured in Advanced RPMI (Gibco, 12633012) containing 1% FCS and  
448 1% GlutaMAX (35050–061, Gibco) under standard tissue culture conditions (5% CO<sub>2</sub>, 20%

449 O<sub>2</sub>). All cell lines were authenticated by short tandem repeat polymorphism, single-  
450 nucleotide polymorphism, and fingerprint analyses, passaged for less than 6 months.  
451 Stable cell lines expressing the FUCI biosensor were generated previously (Hastings et al.,  
452 2020). H2B-mCherry cells were generated by lentiviral transfection, followed by FACS  
453 sorting of low-expressing clones. Finally, dual Chromobody and 53BP1 A549 cells, were  
454 generated by lenti-viral transfection with the PCNA-chromobody, with low expressing clones  
455 isolated by cell sorting. These were then subsequently transfected (lentiviral) with truncated  
456 form of 53BP1 fused to mApple (Apple-53BP1trunc), with cells resorted based on both  
457 mNeonGreen and mApple to isolate dual expressing clones.

458

#### 459 ***Colony Formation Assay and Senescence-Associated Beta-Galactosidase assay***

460 For colony formation assays, cells were seeded on 6 well plates, pulsed with cisplatin (or  
461 not) and one to two weeks later, colonies were stained with 0.5% crystal violet and counted  
462 using ImageJ/Fiji software. For  $\beta$ -Gal assays, cells were seeded on 6 well plates, pulsed with  
463 cisplatin (or not) and fix and stained at 3 days following manufacture's protocol (Cell  
464 Signaling Technology, #9860).

465

#### 466 ***LeGO clonal analysis***

467 A549, NCI-H1573 and NCI-H1299 cells were transfected with LeGO lentiviral particles  
468 (Addgene plasmids #27338, #27339, #27340)(Weber et al., 2008) following the method  
469 described in (Weber et al., 2012). Cells were treated with/without cisplatin and images were  
470 taken at 3 days and at 21 days (A549 and NCI-H1299) or 42 days (NCI-H1573) after cisplatin  
471 exposure. 100 images were taken per timepoint and per condition (3 replicates) and the  
472 experiment was done twice. The total number of clones (unique colour cues) and the  
473 number of cells within each clone was determine. Briefly, images are opened and converted  
474 to 16bit.tif files. An image is duplicated and converted to RGB overlay. The duplicate has  
475 background subtracted using a rolling ball at 250 considering colours separately and using a  
476 sliding paraboloid. The image is smoothed using a mean filter radius 5. Using the "find  
477 maxima" function a point withing individual cells is identified and then enlarged to a circle  
478 radius 5 pixels. These ROI are then applied as a mask to the unprocessed, raw, image data  
479 and the average red, green and blue values within these ROI collected and exported in .csv  
480 format. RGB values from each of the .csv files for each of the 100 images are compiled. Data

481 from cells where an R, G or B value is too high or too low are removed. 512 unique colours  
482 were identified and cells were classified and assigned to each of the 512 colours. More than  
483 90% of all cells were assigned to one of the 64 most represented colours, therefore the  
484 following analysis was performed using these 64 groups

485

#### 486 ***Animal Experiments***

487 Animal experiments were conducted in accordance with the Garvan/St Vincent's Animal  
488 Ethics Committee (guidelines ARA\_18\_17, ARA\_16\_13) and in compliance with the  
489 Australian code of practice for care and use of animals for scientific purposes. Mice were  
490 kept in standard housing at a 12h day light cycle and fed ad libitum. Cage enrichment  
491 refinement was undertaken with mice implanted with mammary optical imaging windows,  
492 supplying the fully plastic IVC cages with papier-mâché domes, feeding supplied in trays on  
493 the cage floor and soft tissues as nesting material. For *in vivo* xenograft models A549 cells  
494 ( $2 \times 10^6$ ) were resuspended in 100  $\mu$ L PBS:Matrigel (1:1) and injected subcutaneously into the  
495 flanks of BALB/c-Fox1nuAusb mice (Australian BioResource). Tumour growth was  
496 assessed twice weekly by calliper measurement and mice were randomized to treatment  
497 arms when tumours reached 150 mm<sup>3</sup> (using the formula: width<sup>2</sup> x length x 0.5).  
498 Carboplatin (60 mg/kg) was delivered by a single i.p injection. Tumours were harvest at 3-7  
499 days post treatment and analysed by IHC for cell size and PCNA positive staining.

500

#### 501 ***Implantation of Optical imaging windows***

502 BALB/c-Foxn1nu/Ausb mice were injected with  $1 \times 10^6$  A549-Fucci subcutaneously near the  
503 inguinal mammary fat pad. Following the development of palpable tumours, mice were  
504 engrafted with titanium mammary imaging windows (Russell Symes & Company) as  
505 described previously (Kedrin et al., 2008; Gligorijevic et al., 2009; Ritsma et al., 2013; Nobis  
506 et al., 2017). Briefly, mice were treated with 5 mg/kg of the analgesic Carprofen (Rimadyl) in  
507 pH neutral drinking water 24h prior and up to a minimum of 72h post-surgery. Mice further  
508 received subcutaneous injections of buprenorphine (0.075mg/kg, Temgesic) immediately  
509 prior and 6h post-surgery. The titanium window was prepared 24h prior to surgery by gluing  
510 a 12mm glass coverslip (Electron Microscopy Science) using cyanoacrylate to the groove on  
511 the outer rim of the titanium window. Following anaesthetic induction at 4% isoflurane  
512 delivered via a vaporizer (VetFlo) supplemented with oxygen, mice were kept at a steady 1-



513 2% maintenance anaesthesia for the duration of the surgery on a heated pad. The incision  
514 site was disinfected using 0.5% chlorhexidine/ 70% ethanol. A straight incision was made  
515 into the skin above the developed subcutaneous tumour and following blunt dissection of  
516 the skin surrounding the incision a purse string suture (5-0 Mersilk, Ethicon) placed. The  
517 windows were then inserted and held in place by tightening the suture, disappearing along  
518 with the skin into the groove of the window and tied off. Mice were allowed to recover for a  
519 minimum of 72h post-surgery, actively foraging, feeding and grooming within minutes from  
520 being removed from the anaesthesia respirator. A minimum of 24h prior to imaging and  
521 treatment mice were weaned off the Carprofen analgesic in the drinking water.

522

### 523 ***In vivo imaging***

524 Mice were imaged under 1-2% isofluorane on a heated stage (Digital Pixel, UK) prior to and  
525 1 day, 2 days, 3 days and 7 days after ip injection of 60 mg/kg Carboplatinum (Sigma) or the  
526 saline vehicle. Multi-photon imaging was performed using a Leica DMI 6000 SP8 confocal  
527 microscope using a 25x 0.95 NA water immersion objective on an inverted stage. For A549-  
528 Fucci imaging the Ti:Sapphire femto-second laser (Coherent Chameleon Ultra II, Coherent)  
529 excitation source operating at 80MHz was tuned to 920 nm and the RLD-HyD detectors with  
530 460/40, 525/50 and 585/40 bandpass emission filters used to detect the second harmonic  
531 generation (SHG) of the collagen I, mAzamiGreen and mKO2 respectively. Images were  
532 acquired at a line rate of 400 Hz, 512x512 pixel and a line average of 8.

533

### 534 ***Flow cytometry Analysis and Sorting***

535 Samples for flow cytometry were fixed in -20°C ethanol overnight, and then stained with a  
536 primary antibody against p21 (Cell Signal Technology, 2947), p16 (Abcam, ab201980) or  
537  $\gamma$ H2A.X (S139)(Abcam, ab26350) and following an incubation with an Alexa Fluor 647  
538 secondary antibody (Invitrogen). Flow cytometry was performed using a Beckman CytoFlex  
539 S. For senescence assays we used ImaGene Green™ C12FDG lacZ Gene Expression Kit  
540 (Molecular probes, I-2904). Three days after cisplatin exposure cells were incubated for 30  
541 min with Bafilomycin A1 (Sigma, B1793) in RPMI medium without phenol red (Gibco)  
542 supplemented with 1% FBS before adding C<sub>12</sub>FDG to the media at 20  $\mu$ M final  
543 concentration. Cells were incubated for 60 minutes prior to 15 minutes fixation with PFA 4%  
544 and processed for FACS analysis. Flow cytometry was performed using a Beckman CytoFlex

545 S. For cell sorting and RNAseq analysis, A549 cells were treated with or without cisplatin (5  
546 mg/mL) for 2 hr, and then allowed to recover for 3-days. Cells were harvested and sorted  
547 based in their size (FSC vs SSC) using a BD FACS Aria IIu. Sorted cells were frozen as pellet in  
548 dry ice and stored at -80°C until RNA purification.

549

### 550 ***Immunofluorescence and live cell imaging***

551 Cells were grown on Histogrip (Life Technologies) coated glass coverslips and fixed with  
552 3.7% formaldehyde diluted in PHEM buffer (60 mM Pipes, 25 mM hepes, 1 mM EGTA, 2 mM  
553 MgCl<sub>2</sub>) with 0.5% Triton X-100 for 10 min. All cells were washed and then blocked (3% BSA,  
554 0,1% Tween 20 in PBS) for 30 min. Cells were incubated with primary antibodies were  
555 incubated for 2 h at room temperature in blocking solution. DNA was stained with H33342  
556 and imaged using a imaged using an EVOS FL2 Auto Imager (Thermofisher) or a Leica SP8-X  
557 confocal with white light laser using either a 20X (NA 0.75) or 63X (NA 1.40) objectives. In  
558 some cases, 0.3 μm Z-sections were taken and displayed as 2D slices or maximum  
559 projections using Fiji (Image J v2.1.0/1.53c) and compiled using Adobe Photoshop CC 2020  
560 software. Deconvolution and 3D volume renderings performed using Huygens Professional  
561 Software (Scientific Volume Imaging, v20.04), while nuclear size analysis was performed  
562 using StarDist (Schmidt et al., 2018) plugins for Fiji/ImageJ. Live cell imaging and IncuCyte  
563 (Sartorius) proliferation assays were performed as previously described (Hastings et al.,  
564 2020). Briefly, for live cell imaging, cells were seeded at 35% confluence on 6 or 12 well  
565 plates and imaged using a Leica DMI6000 using a 20X NA 0.4 objective. Images were taken  
566 every 10-20 min for up to 72 h. Individual cells were followed and scored for nuclear  
567 envelope breakdown (NEBD) and first signs of anaphase as previously described (Caldon and  
568 Burgess, 2019). Mitotic length = NEBD to anaphase, while interphase length = anaphase to  
569 next daughter cell NEBD. Only the first daughter cell to divide was followed and annotated.  
570 For IncuCyte assays, cells were seeded on 12 or 24 well plates and filmed for up to 4 days at  
571 4 h intervals. Confluence and nuclear masks were generated and used to determine cell  
572 proliferation as previously described (McCloy et al., 2014). For 53BP1 and PCNA  
573 chromobody experiments, cells were seeded on 8-Well Ibidi Polymer Coverslip μ-Slides  
574 (#80826), synchronised with thymidine or Palbociclib and pulsed with cisplatin for 2 h,  
575 before imaging on a Lecia SP8 confocal microscope fitted with a white light laser, hybrid  
576 detectors (HyD), a 63X HC PL APO CS2 (NA 1.40) objective and stage top incubator system

577 set at 37C and 5% CO<sub>2</sub>. Multiple X/Y positions, and a 10 µm z-stack (1 µm z-section) taken  
578 every 30 min for 72 h, with 4D deconvolution and volume rendering performed with  
579 Huygens Professional (v20.04) software (Netherlands). 53BP1 and PCNA foci analysis was  
580 performed on 2D-maximim intensity projections using appropriate thresholds coupled with  
581 analyse particles module within ImageJ/Fiji. The pattern of PCNA foci was used to position  
582 cells in early, mid or late S phase, as previously described (Burgess et al., 2012; Charrasse et  
583 al., 2017).

584

### 585 ***Immunohistochemistry***

586 Immunohistochemistry was performed on formalin fixed paraffin embedded sections using  
587 the Leica BOND RX (Leica, Wetzlar, Germany). Slides were first dewaxed and rehydrated,  
588 followed by heat induced antigen retrieval performed with Epitope Retrieval Solution 1  
589 BOND (Leica, Wetzlar, Germany). PCNA Primary antibody was diluted 1:500 (Abcam, ab29)  
590 in Leica antibody diluent and incubated for 60 min on slides. Antibody staining was  
591 completed using the Bond Polymer Refine IHC protocol and reagents (Leica, Wetzlar,  
592 Germany). Slides were counterstained on the Leica Autostainer XL (Leica, Wetzlar,  
593 Germany). Leica CV5030 Glass Coverslipper (Leica, Wetzlar, Germany) and brightfield  
594 images were taken on the Aperio CS2 Slide Scanner (Leica, Wetzlar, Germany).  
595 Quantification of PCNA staining was performed on three fields of view for each tumour  
596 section.

597

### 598 ***RNA isolation, RNA sequencing (RNA-seq), SNV alignment and analysis***

599 Cell pellets were obtained from the different conditions/populations. Cell pellets were  
600 frozen in dry ice prior to storage at -80°C. Total RNA was purified using miRNeasy Micro Kit  
601 (Qiagen, 217084) following the manufacture's protocol, including a DNase treatment. RNA  
602 concentration and quality were also measured by Qubit and Nanodrop. Samples were only  
603 used if they showed a 260/280 ratio >2.0 (Nanodrop). RNA integrity was determined on an  
604 Agilent 2100 Bioanalyser and samples were only used if they showed a RIN of >8. Three sets  
605 of RNA were collected per condition. Compliant samples were sent to the Australian  
606 Genome Research Facility (AGRF) for RNA sequencing with poly(A) selection. Briefly, 20  
607 million 100 bp single end RNA-seq was conducted on an Illumina NovaSeq platform. The  
608 library was prepared using the TruSeq stranded RNA sample preparation protocol (Illumina).

609 The cleaned sequence reads were aligned against the *Homo sapiens* genome (Build version  
610 hg38) and the RNA-seq aligner, “Spliced Transcripts Alignment to a Reference (STAR)”  
611 aligner (v2.5.3a) (Dobin et al., 2013), was used to map reads to the genomic sequence.  
612 Transcripts were assembled using the StringTie tool v1.3.3 (Pertea et al., 2015) with the  
613 read alignment (hg38) and reference annotation-based assembly option (RABT). Raw data  
614 were deposited in the NCBI Gene Expression Omnibus (GEO) data repository accession  
615 number GSE161800.

616

617 The raw data from each cell line was aligned to the human genome reference build  
618 GRCh38/hg38 using STAR aligner v2.5.3a by AGRF. Single Nucleotide Variations (SNVs) were  
619 identified using SNV caller Freebayes (v1.3.1; <https://github.com/ekg/freebayes>) and  
620 annotated using Bcftools (v1.9)(Danecek and McCarthy, 2017) with database NCBI dbSNP  
621 (v146)(Sherry et al., 2001). Heatmaps, principal component analysis (PCA) and biological  
622 coefficient variant plots were made using R language and software (The R Foundation) with  
623 the DESeq2 package (Love et al., 2014). The log<sub>2</sub> (fold change) scale was normalised and  
624 transformed by considering library size or other normalisation factors. The transformation  
625 method and the variance stabilising transformation (VST) (Anders and Huber, 2010) for over  
626 dispersed counts have been applied in DESeq2. The VST is effective at stabilising variance,  
627 because it considers the differences in size factors, such as the datasets with large variation  
628 in sequencing depth (Love et al., 2014). Canonical Pathway analysis of known proliferation,  
629 cell cycle, migration and cell death-related signalling pathways were conducted using the  
630 Ingenuity Pathway Analysis software (QIAGEN), as previously described (Johnson et al.,  
631 2020). Briefly, minimum significance cut offs of p-value>0.05 and Z scores of >2 and <-2  
632 were applied for pathways analysis. For Gene Set Enrichment Analysis (GSEA) a ranked gene  
633 list was prepared from Proliferative versus Arrest and analysed with GSEA 4.1.0 software  
634 (<https://www.gsea-msigdb.org/gsea/index.jsp>) using a curated gene set of canonical  
635 pathways (2868 gene sets) (<https://www.gsea-msigdb.org/gsea/msigdb/collections.jsp#C2>)  
636 (Mootha et al., 2003; Subramanian et al., 2005). The enrichment map was generated using  
637 Cytoscape 3.8.2 software (<https://cytoscape.org/>)(Shannon et al., 2003), using p-value  
638 (<0.005) and FDR (q<0.1) cut offs. Volcano and dot plots were generated using GraphPad  
639 PRISM (v9.0.0) and figures compiled using Adobe Illustrator (v25).

640

641 **Acknowledgements**

642 The authors would like to acknowledge Dr Atsushi Miyawaki (Riken, Japan) for provision of  
643 the mVenus-hGeminin(1/110) and mKO-hCdt1(30/120) constructs for FUCCI imaging. Dr Liz  
644 Caldon for her insightful and helpful comments. The Patricia Helen Guest Fellowship for  
645 their generous support. The authors acknowledge the ANZAC Microscopy and Flow Facility,  
646 the Sydney Informatics Hub and the use of the University of Sydney's high performance  
647 computing cluster, Artemis.

648

649 **Additional Information**

650 **Funding:**

|     |                                   |              |                  |
|-----|-----------------------------------|--------------|------------------|
| 651 | Cancer Institute NSW              | 2013/FRL102  | David R Croucher |
| 652 | Cancer Institute NSW              | 15/REG/1-17  | David R Croucher |
| 653 | Cancer Institute NSW              | 10/FRL/3-02  | Andrew Burgess   |
| 654 | National Breast Cancer Foundation | IIRS-18-103  | Andrew Burgess   |
| 655 | Tour de Cure                      | RSP-230-2020 | Andrew Burgess   |

656

657 The funders had no role in study design, data collection and interpretation, or the decision  
658 to submit the work for publication.

659

660 **Author contributions**

661 Alvaro Gonzalez Rajal, Conceptualization, Data curation, Formal analysis, Visualization,  
662 Methodology; Rachael A McCloy, Formal analysis, Investigation, Methodology; Max Nobis,  
663 Formal analysis, Visualization, Methodology; Kamila A Marzec, Data curation, Formal  
664 analysis, Visualization; Venessa Chin, Resources, Data curation, Supervision, Investigation,  
665 Methodology; Jordan F. Hastings, Formal analysis, Visualization; Kaitao Lai, Formal analysis,  
666 Visualization, Data curation; Marina Kennerson, Supervision, Methodology; Vijesh Vaghjiani,  
667 Data curation, Formal analysis; William E Hughes, Data curation, Formal analysis; Paul  
668 Timpson, Supervision, Methodology; Jason Cain, Data curation, Formal analysis,  
669 Supervision, Methodology; D Neil Watkins, Conceptualization, Supervision, Methodology,  
670 Data curation, Formal analysis, Visualization; David R Croucher, Conceptualization, Formal  
671 analysis, Supervision, Funding acquisition, Investigation, Project administration; Andrew

672 Burgess, Conceptualization, Formal analysis, Supervision, Validation, Investigation,  
673 Visualization, Methodology, Project administration, Funding acquisition.

674

#### 675 **Author ORCIDs**

676 Alvaro Gonzalez-Rajal: <https://orcid.org/0000-0002-9230-0339>

677 Rachael McCloy: <https://orcid.org/0000-0001-7791-4044>

678 Max Nobis: <https://orcid.org/0000-0002-1861-1390>

679 Venessa Chin: <https://orcid.org/0000-0002-4630-4451>

680 Kamila A. Marzec: <https://orcid.org/0000-0002-3051-2205>

681 Marina Kennerson <https://orcid.org/0000-0003-3332-5074>

682 Kaitao Lai <https://orcid.org/0000-0002-9420-9352>

683 D. Neil Watkins: <https://orcid.org/0000-0001-8218-4920>

684 David R Croucher <https://orcid.org/0000-0003-4965-8674>

685 Andrew Burgess <https://orcid.org/0000-0003-4536-9226>

686

687 **Animal experimentation:** All experiments were carried out in compliance with the  
688 Australian code for the care and use of animals for scientific purposes and in compliance  
689 with Garvan Institute of Medical Research/St. Vincent's Hospital Animal Ethics Committee  
690 guidelines (ARA\_18\_17, ARA\_16\_13).

691

#### 692 **Figure Legends:**

693 **Figure 1 – Rechallenging LUAD cells with cisplatin results in similar response profiles. (A)**

694 Schematic of rechallenging experiments. Briefly, cells stably expressing H2B-mCherry were  
695 pulsed with 5µg/ml cisplatin for 2 h. Cell proliferation (nuclear number and cell size) were  
696 then tracked for up to 4-days. Cells were then allowed to recover for 21 (A549 and NCI-  
697 H1299) or 42 days (NCI-H1573), re-culturing once confluent, before being re-pulsed with  
698 cisplatin. **(B)** Cell confluence and cell number were tracked over for up to 4-days using by  
699 IncuCyte based time-lapse imaging. Shown are the mean +/- SD of 3 biological repeats. **(C)**  
700 Immunofluorescence of cells at 72 h post cisplatin treatment. Nuclei = cyan, β-tubulin = red,  
701 scale bar = 10µm. **(D)** Quantification of cell size and nuclear size from A, with a minimum of  
702 200 cells analysed per condition. Shown are the mean +/- SD. Statistical significance was  
703 determined by one-way ANOVA (\*\*\*\*p<0.0001, n.s = not significant).

704 **Figure 2 – Variable cell size and clonal outgrowth in post-cisplatin treated cells. (A)**

705 Representative images from cells treated as per Figure 1A showing Control (Cont.)  
706 proliferative (Prolif.) and arrested (Arrest) cells. **(B)** Cell and nuclear size were calculated on  
707 sub-populations of cells that appeared to form clonal outgrowths. Quantification of cell size  
708 and nuclear size from A, with a minimum of 100 cells analysed per condition. Shown are the  
709 mean $\pm$  SD. Statistical significance was determined by one-way ANOVA (\*\*\*\* $p$ <0.0001, n.s  
710 = not significant). **(C)** LeGo RGB colour guided clonal cell tracking system was used to track  
711 clonal dynamics after cisplatin pulse treatment. Cells were treated as per Figure 1A, with  
712 clonal identification and quantification **(D)**, measured at 3 and 21-days post cisplatin  
713 exposure using Image J/Fiji (42-days post cisplatin exposure for NCI-H1573).

714

715 **Figure 3 – In vivo validation of cisplatin effects on cell size and proliferation. (A)** A549 and

716 NCI-H1299 cells were injected subcutaneously with  $2 \times 10^6$  cells into the flanks of nude mice.  
717 Carboplatin (60 mg/kg) was delivered by a single tail-vein injection and tumours were  
718 harvest at 3 days post treatment and analysed by IHC for cell size and PCNA positive  
719 staining. Scale bar = 50 $\mu$ m **(B)** Quantitation of IHC images from A (control n=300, carbo  
720 n=400). Shown are the mean $\pm$  SD. Statistical significance was determined by t-test  
721 (\*\*\*\* $p$ <0.0001, n.s = not significant).

722

723 **Figure 4 – Comparative RNAseq analysis of FACS sorted cisplatin treated cells. (A)**

724 Schematic describing treatment, sorting and analysis pipeline. **(B)** Representative example  
725 of pre- and post-sorted control and cisplatin treated cells. **(C)** Hierarchical clustering of 3-  
726 independent biological repeat experiments of all altered genes identified by RNA-seq. **(D-F)**  
727 Volcano plots displaying significantly downregulated (blue) or upregulated (orange) genes  
728 and subsequent IPA canonical pathway analysis. Predictions of inhibition (blue) or activation  
729 (orange) or no change (white) states are based on the Ingenuity<sup>®</sup>Knowledge Base, which  
730 compares the expected change with experimental observation to all known upstream  
731 regulators. Variable stringent  $p$ -value (>1.3) and z-score (>0.5) cut-offs were used to limit  
732 pathways to top 7–8 most significant hits. **(G)** Hierarchical clustering of IPA comparative  
733 canonical analysis.

734

735 **Figure 5 – Cell Cycle dependent regulation of cisplatin response. (A-B)** Schematic of  
736 Palbociclib (Palbo) and Thymidine (Thy) protocols used synchronize FUCCI expressing A549  
737 cells in G1, early and late S phase prior to 2h cisplatin pulse treatment. Specifically, G1 cells  
738 were released from Palbociclib and pulsed immediately with cisplatin (Palbo + Cis at 0h).  
739 Late G1 cells were pulsed with cisplatin at 6 h post release from released from Palbociclib  
740 (Palbo + Cis at 6h). Early S phase cells were treated with cisplatin 2 h prior to release from  
741 thymidine (Thy + Cis at -2h). Finally, mid-late S phase cells were pulsed with cisplatin at 4h  
742 post thymidine release (Thy + Cis at 4h). The fate of individual cells (n=50) The fate of  
743 individual cells (n=50) was tracked by time lapse microscopy, with images taken every 30  
744 min for 72 h. **(C)** Quantification of cell fate outcomes from A; including G1 arrest before  
745 mitosis (G1 ABM), G1 arrest after mitosis (G1 AAM), death before mitosis (DBM) and death  
746 after mitosis (DAM) and Proliferative (Prolif.). **(D)** Quantitation of the total number of cell  
747 divisions overserved in each condition (n=50). Mean is shown, statistical significance was  
748 determined by one-way ANOVA (\*\*\*\*p<0.0001, \*p<0.05). **(E)** Schematic of optical window  
749 based longitudinal *in vivo* imaging of FUCCI A549 cells. **(F)** Representative 3D projection  
750 images from mice imaged at day 1 and day 7 with carboplatin (Carbo) or control (Saline). **(G)**  
751 Quantification of the proportion of red (G1), yellow (G1/S) and green (S/G2-M) cells found  
752 in tumours (n=3) from day 0 to 7.

753

754 **Figure 6 – Dual DNA replication and damage biosensor analysis of cisplatin treated cells.**  
755 **(A)** Representative maximum image projections of A549 cells co-expressing a mNeonGreen  
756 tagged PCNA chromobody (cyan) and a truncated version of 53BP1 tagged with mApple  
757 (trunc53BP1-mApple; red-hot LUT). Cells were imaged using confocal microscopy, with 10  
758  $\mu\text{m}$  thick z-stack (1  $\mu\text{m}$  slice) taken every 30 min for 72 h. Scale bar 10  $\mu\text{m}$ . (B) Quantification  
759 of the size and number of PCNA and 53BP1 foci for each cell shown in A. (C) 3D volume  
760 renders from cells in A for the indicated times, with cropped zoom areas (right image).  
761 White arrows indicate 53BP1 foci that reduce in size over time (min). Scale bars 5  $\mu\text{m}$  and 1  
762  $\mu\text{m}$  for left and right panels respectively.

763

764 **Figure 7 – Inhibition of PARP reduces ability of early S phase cells to maintain proliferative**  
765 **capacity. (A)** Schematic of Palbociclib (Palbo) and Thymidine (Thy) protocols used  
766 synchronize FUCCI expressing A549 cells in G1, early and late S phase prior to Olaparib



767 (PARPi; 1  $\mu$ M) and 2h cisplatin (5  $\mu$ g/ml) pulse treatment. The fate of (n=50) individual cells  
768 was tracked by time-lapse microscopy, with images taken every 30 min for 72 h.  
769 Quantitation of the total number of cell divisions **(B)** and G1 length after **(C)** first mitotic  
770 division overserved in each condition. Statistical significance was determined by one-way  
771 ANOVA (\*\*p<0.001, \*p<0.05). **(D)** Quantification of cell fate outcomes from A; including G1  
772 arrest before mitosis (G1 ABM), G1 arrest after mitosis (G1 AAM), death before mitosis  
773 (DBM) and death after mitosis (DAM) and Proliferative (Prolif.). **(E)** Fluorescent imaging of  
774 asynchronous A549 dual biosensor cells pulsed with cisplatin for 2 h. The percentage of cells  
775 with less than 5 (<5) or more than 15 (>15) (<5) 53BP1 foci/cell after cisplatin treatment are  
776 shown. A minimum of 250 cells per timepoint and condition were counted from (n=3)  
777 biological repeats. Statistical significance was determined by two-way ANOVA (\*p<0.05). **(F)**  
778 Thymidine synchronized cells treated as per A, were harvested, and analysed for cell size  
779 and  $\gamma$ -H2AX by flow cytometry. Representative FACS plots and quantification from (n=3)  
780 biological repeats are shown. Statistical significance was determined by one-way ANOVA  
781 (\*\*p<0.001, \*p<0.05).

782

783 **Figure 8 – Schematic outlining cell cycle dependence of cisplatin recovery.** Briefly, cells  
784 exposed in G1 undergo S/G2 phase arrest, marked by high levels of P70S6K, p53 and p21,  
785 which results in a stable and permanent cell cycle exit from G2 phase. Cells in late S phase,  
786 likely receive platinum adducts in areas of already duplicated DNA, with error-prone non-  
787 homologous end joining (NHEJ) favoured over homologous recombination (HR). Combined  
788 with an increase in cells undergoing aberrant division, results in daughter cells displaying  
789 higher rates of damage during replication resulting in S/G2 arrest and senescence. In  
790 contrast, cells in late G1/ early S phase, have the opportunity to detect and repair damage  
791 by HR during the first cycle, thereby increasing chances daughter cells will successfully  
792 complete and repair damage, thereby allowing continued proliferation.

793

794

## 795 **Supplementary Figures and Tables**

796 **Figure 2 Supplement 1: (A)** Representative images and quantification of colony formation  
797 assays for A549, NCI-H1573 and NCI-H1299 cells treated with or without cisplatin. Colonies  
798 were fixed, stained and counted 10 (A549 and NCI-H1299) or 14 days (NCI-H1573) after

799 cisplatin exposure. Scale bar = 100 $\mu$ m. Shown are the mean +/- SD of 3 biological repeats.  
800 Statistical significance was determined by Students t-test  
801 (\*\*\*\*p<0.0001,\*\*\*p<0.001,\*\*p<0.01). **(B)** Representative images and quantification of  
802 A549, NCI-H1573 and CI-H1299 cells 3 days after cisplatin exposure stained for beta-  
803 galactosidase. Scale bar = 100 $\mu$ m. Shown are the mean +/- SD of 3 biological repeats. **(C)**  
804 FACS analysis of P21, P16 and beta galactosidase activity levels (C<sub>12</sub>FDG) versus “cell size”  
805 (FSC) at 3-days after cisplatin exposure. Shown are the mean +/- SD of 3 biological repeats.  
806

807 **Figure 4 Supplement 1: (A)** Cytoscape Enrichment map of curated gene sets of canonical  
808 pathways for Proliferative versus Arrested cells. Each node represents a gene set and each  
809 line connecting nodes a gene “common” to both nodes. Shown are gene sets enriched in  
810 proliferative (Red) and Arrested (blue). The size of the node represents the NES score of that  
811 particular gene set. **(B)** GSEA Enrichment plots for Proliferative versus Arrest cells (curated  
812 gene sets for canonical pathways). From left to right and top to bottom: Cell Cycle,  
813 Homology Directed Repair, Fanconi Pathway and ATR Pathway. The green curve  
814 corresponds to the ES (enrichment score) curve, which is the running sum of the weighted  
815 enrichment score obtained from GSEA software, while the normalized enrichment score  
816 (NES) and the corresponding FDR (false discovery rate) value are reported within each  
817 graph.

818  
819 **Figure 5 Supplement 1: (A)** Representative images of A549 FUCCI expressing cells treated  
820 with (Cisplatin) or without (Control) 5 $\mu$ g/ml cisplatin for 2 h and then followed by time lapse  
821 microscopy. Images were taken every 20 min for 3 days. Arrows indicate mother and  
822 daughter cells followed through time. **(B,C)** Single cell fate maps from cells (n=50) control  
823 and (n=100) cisplatin treated cells. **(D)** Quantification of cell cycle phase length from data  
824 generated in B and C. Statistical significance was determined by one-way ANOVA  
825 (\*\*\*\*p<0.0001, n.s = not significant).

826  
827 **Figure 6 Supplement 1: (A)** Quantification of the size and number of PCNA and 53BP1 foci  
828 for additional cells as per Figure 6A and 6B. (B) Number of 53BP1 foci in cells from early S  
829 and mid/late S phase (n=4), were temporally aligned base on entry into and exit from the  
830 first mitosis. (C) Representative images of the first mitosis observed in cells that were in mid

831 S-phase at the time of cisplatin exposure. White arrow heads indicate micronuclei (mn) in  
832 daughter cells, cf= cytokinesis failure. Scale bar = 10  $\mu$ m.

833

834

835 **References:**

836

837 Anders, S., and Huber, W. (2010). Differential expression analysis for sequence count data.  
838 *Genome Biol* 11, R106. doi:10.1186/gb-2010-11-10-r106.

839 Andersson, A., Fagerberg, J., Lewensohn, R., and Ehrsson, H. (1996). Pharmacokinetics of  
840 Cisplatin and Its Monohydrated Complex in Humans. *J Pharm Sci* 85, 824–827.  
841 doi:10.1021/js960037a.

842 Barr, A. R., Cooper, S., Heldt, F. S., Butera, F., Stoy, H., Mansfeld, J., et al. (2017). DNA  
843 damage during S-phase mediates the proliferation-quiescence decision in the  
844 subsequent G1 via p21 expression. *Nat Commun* 8, ncomms14728.  
845 doi:10.1038/ncomms14728.

846 Baus, F., Gire, V., Fisher, D., Piette, J., and Dulić, V. (2003). Permanent cell cycle exit in G2  
847 phase after DNA damage in normal human fibroblasts. *The EMBO Journal* 22, 3992–4002.  
848 doi:10.1093/emboj/cdg387.

849 Burgess, A., Lorca, T., and Castro, A. (2012). Quantitative live imaging of endogenous DNA  
850 replication in mammalian cells. *Plos One* 7, e45726. doi:10.1371/journal.pone.0045726.

851 Burgess, A., Rasouli, M., and Rogers, S. (2014). Stressing Mitosis to Death. *Frontiers Oncol* 4,  
852 140. doi:10.3389/fonc.2014.00140.

853 Caldon, C. E., and Burgess, A. (2019). Label free, quantitative single-cell fate tracking of  
854 time-lapse movies. *Methodsx* 6, 2468–2475. doi:10.1016/j.mex.2019.10.014.

855 Chan, Y. W., Fugger, K., and West, S. C. (2017). Unresolved recombination intermediates  
856 lead to ultra-fine anaphase bridges, chromosome breaks and aberrations. *Nat Cell Biol*  
857 20, 92–103. doi:10.1038/s41556-017-0011-1.

858 Chan, Y. W., and West, S. C. (2018). A new class of ultrafine anaphase bridges generated by  
859 homologous recombination. *Cell Cycle* 17, 1–9. doi:10.1080/15384101.2018.1515555.

860 Charrasse, S., Gharbi-Ayachi, A., Burgess, A., Vera, J., Hached, K., Raynaud, P., et al. (2017).  
861 Ensa controls S-phase length by modulating Treslin levels. *Nat Commun* 8, 206.  
862 doi:10.1038/s41467-017-00339-4.

863 Danecek, P., and McCarthy, S. A. (2017). BCFtools/csq: haplotype-aware variant  
864 consequences. *Bioinformatics* 33, btx100. doi:10.1093/bioinformatics/btx100.

- 865 Dobin, A., Davis, C. A., Schlesinger, F., Drenkow, J., Zaleski, C., Jha, S., et al. (2013). STAR:  
866 ultrafast universal RNA-seq aligner. *Bioinformatics* 29, 15–21.  
867 doi:10.1093/bioinformatics/bts635.
- 868 Enoiu, M., Jiricny, J., and Schärer, O. D. (2012). Repair of cisplatin-induced DNA interstrand  
869 crosslinks by a replication-independent pathway involving transcription-coupled repair  
870 and translesion synthesis. *Nucleic Acids Res* 40, 8953–64. doi:10.1093/nar/gks670.
- 871 Gligorijevic, B., Kedrin, D., Segall, J. E., Condeelis, J., and Rheenen, J. van (2009). Dendra2  
872 Photoswitching through the Mammary Imaging Window. *J Vis Exp Jove*, 1278.  
873 doi:10.3791/1278.
- 874 Gonzalez-Rajal, A., Hastings, J. F., Watkins, D. N., Croucher, D. R., and Burgess, A. (2020).  
875 Breathing New Life into the Mechanisms of Platinum Resistance in Lung  
876 Adenocarcinoma. *Frontiers Cell Dev Biology* 8, 305. doi:10.3389/fcell.2020.00305.
- 877 Hastings, J. F., Rajal, A. G., Latham, S. L., Han, J. Z., McCloy, R. A., O'Donnell, Y. E., et al.  
878 (2020). Analysis of pulsed cisplatin signalling dynamics identifies effectors of resistance in  
879 lung adenocarcinoma. *Elife* 9, e53367. doi:10.7554/elife.53367.
- 880 Hayashi, M. T., and Karlseder, J. (2013). DNA damage associated with mitosis and  
881 cytokinesis failure. *Oncogene* 32, 4593–4601. doi:10.1038/onc.2012.615.
- 882 Herbst, R. S., Morgensztern, D., and Boshoff, C. (2018). The biology and management of  
883 non-small cell lung cancer. *Nature* 553, 446–454. doi:10.1038/nature25183.
- 884 Hsu, C.-H., Altschuler, S. J., and Wu, L. F. (2019). Patterns of Early p21 Dynamics Determine  
885 Proliferation-Senescence Cell Fate after Chemotherapy. *Cell* 178, 361-373.e12.  
886 doi:10.1016/j.cell.2019.05.041.
- 887 Johnson, T. G., Schelch, K., Lai, K., Marzec, K. A., Kennerson, M., Grusch, M., et al. (2020).  
888 YB-1 Knockdown Inhibits the Proliferation of Mesothelioma Cells through Multiple  
889 Mechanisms. *Cancers* 12, 2285. doi:10.3390/cancers12082285.
- 890 Karanam, K., Kafri, R., Loewer, A., and Lahav, G. (2012). Quantitative live cell imaging reveals  
891 a gradual shift between DNA repair mechanisms and a maximal use of HR in mid S phase.  
892 *Mol Cell* 47, 320–9. doi:10.1016/j.molcel.2012.05.052.
- 893 Kedrin, D., Gligorijevic, B., Wyckoff, J., Verkhusha, V. V., Condeelis, J., Segall, J. E., et al.  
894 (2008). Intravital imaging of metastatic behavior through a mammary imaging window.  
895 *Nat Methods* 5, 1019–1021. doi:10.1038/nmeth.1269.
- 896 Kelland, L. (2007). The resurgence of platinum-based cancer chemotherapy. *Nat Rev Cancer*  
897 7, 573–584. doi:10.1038/nrc2167.
- 898 Love, M. I., Huber, W., and Anders, S. (2014). Moderated estimation of fold change and  
899 dispersion for RNA-seq data with DESeq2. *Genome Biol* 15, 550. doi:10.1186/s13059-014-  
900 0550-8.

- 901 Mamdani, H., and Jalal, S. I. (2016). DNA repair in lung cancer: potential not yet reached.  
902 *Lung Cancer Management* 5, 5–8. doi:10.2217/lmt-2016-0004.
- 903 Marini, K. D., Croucher, D. R., McCloy, R. A., Vaghjiani, V., Gonzalez-Rajal, A., Hastings, J. F.,  
904 et al. (2018). Inhibition of activin signaling in lung adenocarcinoma increases the  
905 therapeutic index of platinum chemotherapy. *Sci Transl Med* 10, eaat3504.  
906 doi:10.1126/scitranslmed.aat3504.
- 907 McCloy, R. A., Rogers, S., Caldon, C. E., Lorca, T., Castro, A., and Burgess, A. (2014). Partial  
908 inhibition of Cdk1 in G 2 phase overrides the SAC and decouples mitotic events. *Cell Cycle*  
909 *Georget Tex* 13, 1400–12. doi:10.4161/cc.28401.
- 910 Mootha, V. K., Lindgren, C. M., Eriksson, K.-F., Subramanian, A., Sihag, S., Lehar, J., et al.  
911 (2003). PGC-1 $\alpha$ -responsive genes involved in oxidative phosphorylation are coordinately  
912 downregulated in human diabetes. *Nat Genet* 34, 267–273. doi:10.1038/ng1180.
- 913 Murai, J., and Pommier, Y. (2018). PARP Trapping Beyond Homologous Recombination and  
914 Platinum Sensitivity in Cancers. *Annu Rev Cancer Biology* 3, 1–20. doi:10.1146/annurev-  
915 cancerbio-030518-055914.
- 916 Nobis, M., Herrmann, D., Warren, S. C., Kadir, S., Leung, W., Killen, M., et al. (2017). A RhoA-  
917 FRET Biosensor Mouse for Intravital Imaging in Normal Tissue Homeostasis and Disease  
918 Contexts. *Cell Reports* 21, 274–288. doi:10.1016/j.celrep.2017.09.022.
- 919 Perteua, M., Perteua, G. M., Antonescu, C. M., Chang, T.-C., Mendell, J. T., and Salzberg, S. L.  
920 (2015). StringTie enables improved reconstruction of a transcriptome from RNA-seq  
921 reads. *Nat Biotechnol* 33, 290–295. doi:10.1038/nbt.3122.
- 922 Ritsma, L., Steller, E. J. A., Ellenbroek, S. I. J., Kranenburg, O., Rinkes, I. H. M. B., and  
923 Rheenen, J. van (2013). Surgical implantation of an abdominal imaging window for  
924 intravital microscopy. *Nat Protoc* 8, 583–594. doi:10.1038/nprot.2013.026.
- 925 Saldivar, J. C., Hamperl, S., Bocek, M. J., Chung, M., Bass, T. E., Cisneros-Soberanis, F., et al.  
926 (2018). An intrinsic S/G 2checkpoint enforced by ATR. *Science* 361, 806–810.  
927 doi:10.1126/science.aap9346.
- 928 Salvador-Barbero, B., Álvarez-Fernández, M., Zapatero-Solana, E., Bakkali, A. E., Menéndez,  
929 M. del C., López-Casas, P. P., et al. (2020). CDK4/6 Inhibitors Impair Recovery from  
930 Cytotoxic Chemotherapy in Pancreatic Adenocarcinoma. *Cancer Cell* 37, 340–353.e6.  
931 doi:10.1016/j.ccell.2020.01.007.
- 932 Sarlós, K., Biebricher, A., Petermann, E. J. G., Wuite, G. J. L., and Hickson, I. D. (2017). Knotty  
933 Problems during Mitosis: Mechanistic Insight into the Processing of Ultrafine DNA  
934 Bridges in Anaphase. *Cold Spring Harb Sym* 82, 187–195.  
935 doi:10.1101/sqb.2017.82.033647.
- 936 Schmidt, U., Weigert, M., Broaddus, C., and Myers, G. (2018). Cell Detection with Star-  
937 convex Polygons. *Arxiv*, 265–273. doi:10.1007/978-3-030-00934-2\_30.

- 938 Shannon, P., Markiel, A., Ozier, O., Baliga, N. S., Wang, J. T., Ramage, D., et al. (2003).  
939 Cytoscape: A Software Environment for Integrated Models of Biomolecular Interaction  
940 Networks. *Genome Res* 13, 2498–2504. doi:10.1101/gr.1239303.
- 941 Sherry, S. T., Ward, M.-H., Kholodov, M., Baker, J., Phan, L., Smigielski, E. M., et al. (2001).  
942 dbSNP: the NCBI database of genetic variation. *Nucleic Acids Res* 29, 308–311.  
943 doi:10.1093/nar/29.1.308.
- 944 Slyskova, J., Sabatella, M., Ribeiro-Silva, C., Stok, C., Theil, A. F., Vermeulen, W., et al. (2018).  
945 Base and nucleotide excision repair facilitate resolution of platinum drugs-induced  
946 transcription blockage. *Nucleic Acids Res* 46, 9537–9549. doi:10.1093/nar/gky764.
- 947 Smogorzewska, A. (2019). Fanconi Anemia: A Paradigm for Understanding DNA Repair  
948 During Replication. *Blood* 134, SCI-32-SCI-32. doi:10.1182/blood-2019-121229.
- 949 Spies, J., Lukas, C., Somyajit, K., Rask, M.-B., Lukas, J., and Neelsen, K. J. (2019). 53BP1  
950 nuclear bodies enforce replication timing at under-replicated DNA to limit heritable DNA  
951 damage. *Nat Cell Biol* 21, 1–11. doi:10.1038/s41556-019-0293-6.
- 952 Stewart, D. J. (2007). Mechanisms of resistance to cisplatin and carboplatin. *Crit Rev Oncol*  
953 *Hemat* 63, 12–31. doi:10.1016/j.critrevonc.2007.02.001.
- 954 Subramanian, A., Tamayo, P., Mootha, V. K., Mukherjee, S., Ebert, B. L., Gillette, M. A., et al.  
955 (2005). Gene set enrichment analysis: A knowledge-based approach for interpreting  
956 genome-wide expression profiles. *P Natl Acad Sci Usa* 102, 15545–15550.  
957 doi:10.1073/pnas.0506580102.
- 958 Swiecicki, P. L., Durm, G., Bellile, E., Bhangale, A., Brenner, J. C., and Worden, F. P. (2020). A  
959 multi-center phase II trial evaluating the efficacy of palbociclib in combination with  
960 carboplatin for the treatment of unresectable recurrent or metastatic head and neck  
961 squamous cell carcinoma. *Invest New Drug* 38, 1550–1558. doi:10.1007/s10637-020-  
962 00898-2.
- 963 Tutt, A., Tovey, H., Cheang, M. C. U., Kernaghan, S., Kilburn, L., Gazinska, P., et al. (2018).  
964 Carboplatin in BRCA1/2-mutated and triple-negative breast cancer BRCAness subgroups:  
965 the TNT Trial. *Nat Med* 24, 628–637. doi:10.1038/s41591-018-0009-7.
- 966 Urien, S., and Lokiec, F. (2004). Population pharmacokinetics of total and unbound plasma  
967 cisplatin in adult patients. *British Journal of Clinical Pharmacology* 57, 756–763.  
968 doi:10.1111/j.1365-2125.2004.02082.x.
- 969 Watt, L. P., Natsum, T., Saito, Y., Garzón, J., Dong, Q., Boteva, L., et al. (2020). The RIF1-Long  
970 splice variant promotes G1 phase 53BP1 nuclear bodies to protect against replication  
971 stress. *eLife*. doi:10.7554/elife.58020.
- 972 Weber, K., Bartsch, U., Stocking, C., and Fehse, B. (2008). A Multicolor Panel of Novel  
973 Lentiviral “Gene Ontology” (LeGO) Vectors for Functional Gene Analysis. *Mol Ther* 16,  
974 698–706. doi:10.1038/mt.2008.6.

975 Weber, K., Thomaschewski, M., Benten, D., and Fehse, B. (2012). RGB marking with lentiviral  
976 vectors for multicolor clonal cell tracking. *Nat Protoc* 7, 839–849.  
977 doi:10.1038/nprot.2012.026.

978 Weber, K., Thomaschewski, M., Warlich, M., Volz, T., Cornils, K., Niebuhr, B., et al. (2011).  
979 RGB marking facilitates multicolor clonal cell tracking. *Nat Med* 17, 504–509.  
980 doi:10.1038/nm.2338.

981 Yang, K. S., Kohler, R. H., Landon, M., Giedt, R., and Weissleder, R. (2015). Single cell  
982 resolution in vivo imaging of DNA damage following PARP inhibition. *Sci Rep-uk* 5, 10129.  
983 doi:10.1038/srep10129.

984

# Figure 1

Rajal et al 2020

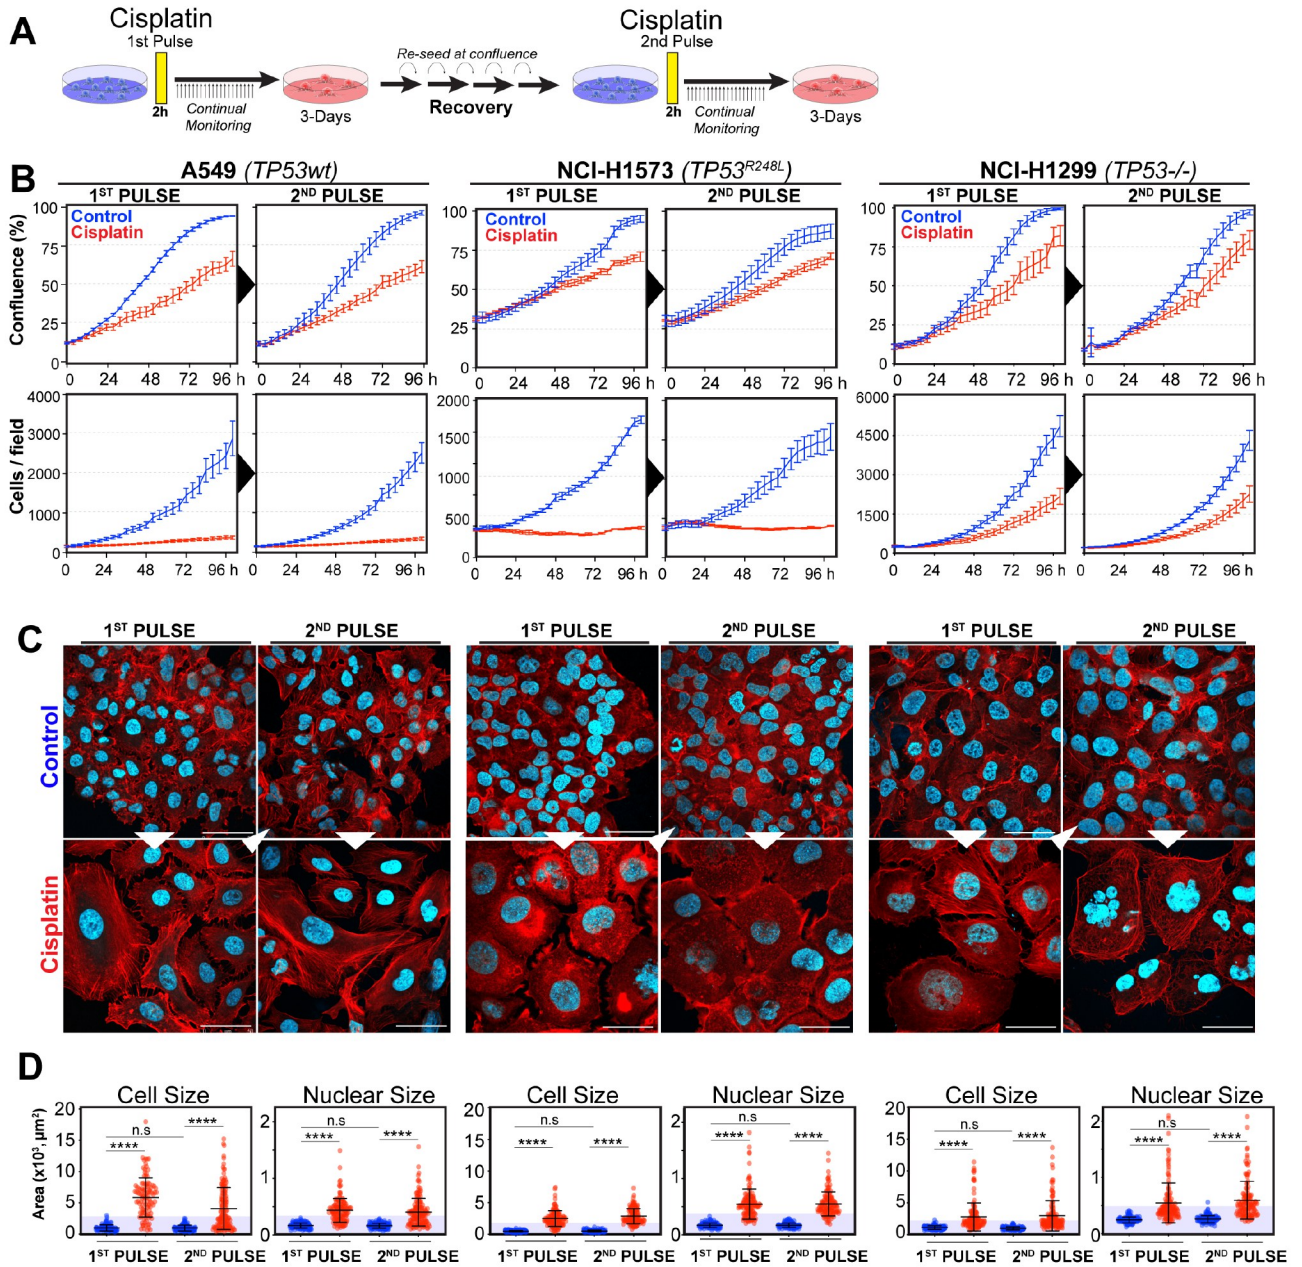



## Figure 2

Rajal et al 2020

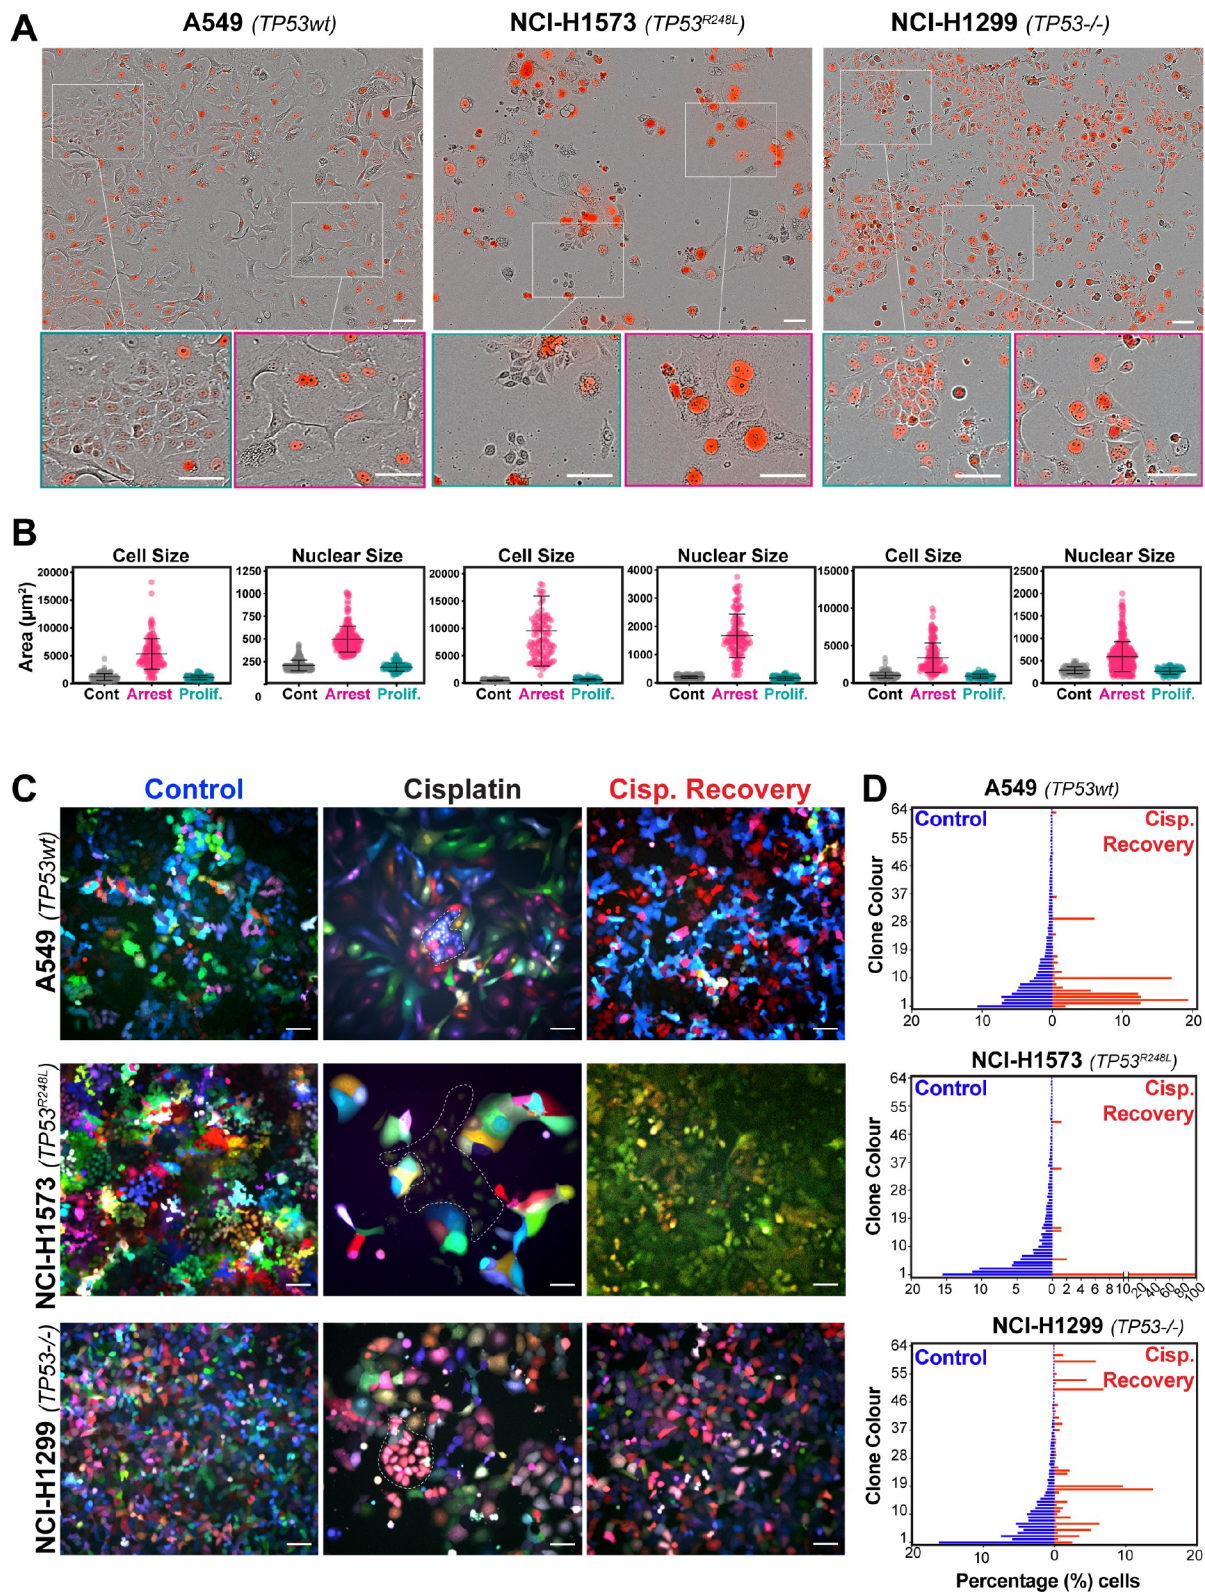

## Figure 2 -Supplement 1

Rajal et al 2020

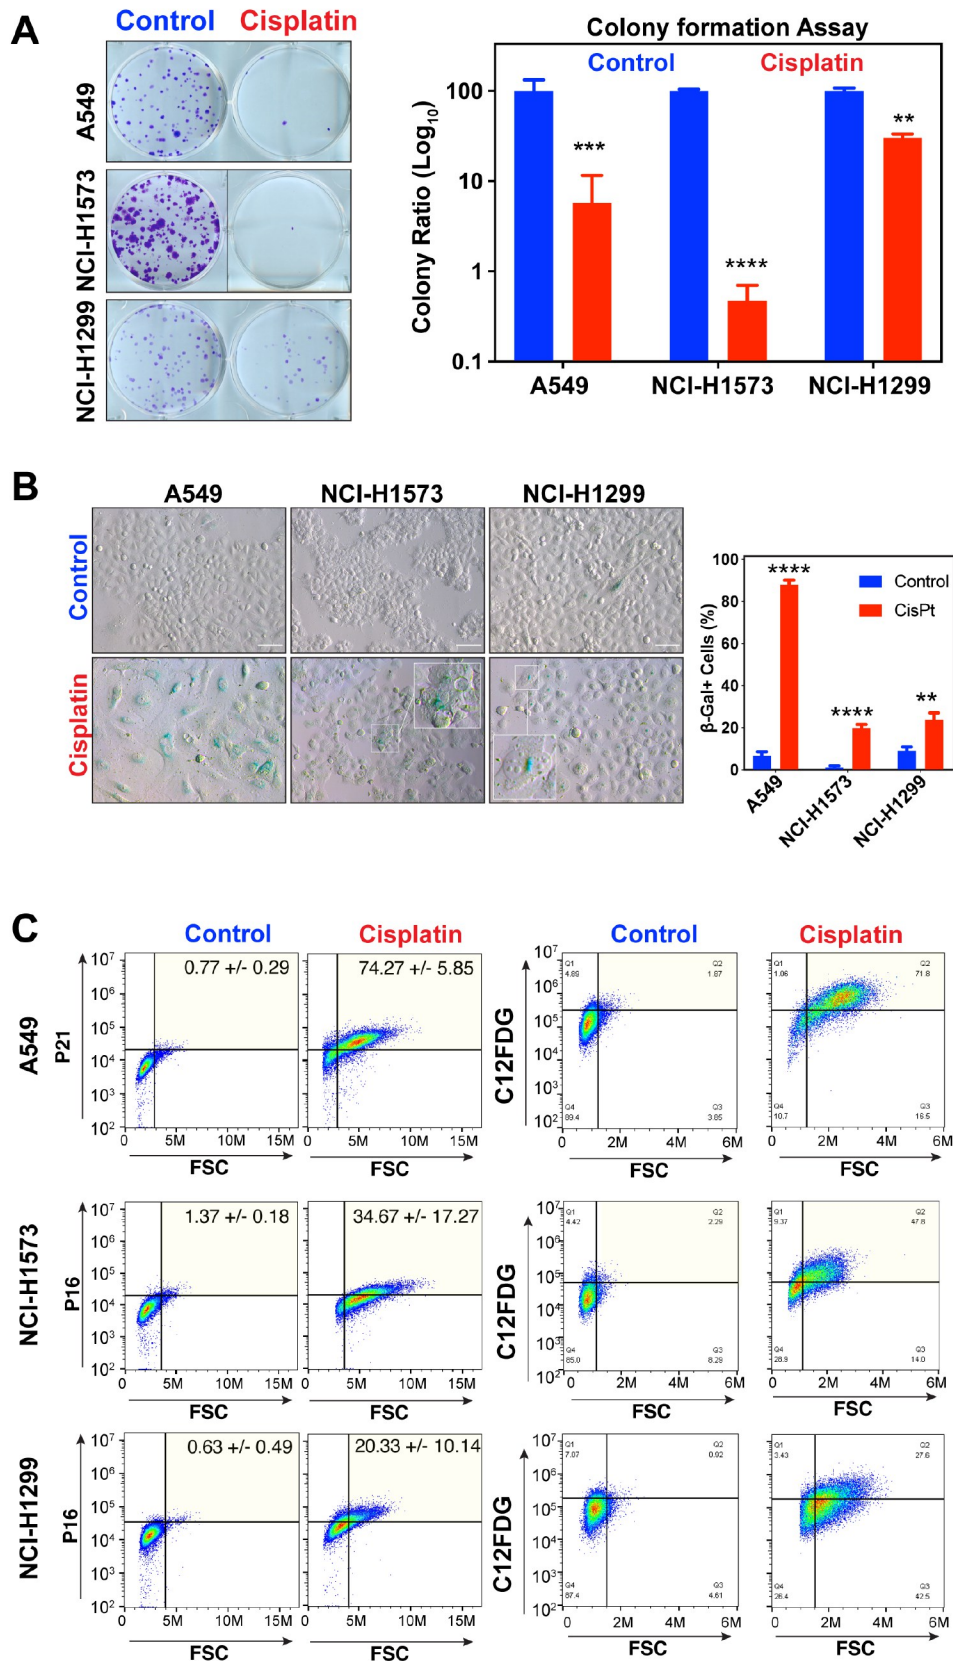

## Figure 3

Rajal et al 2020

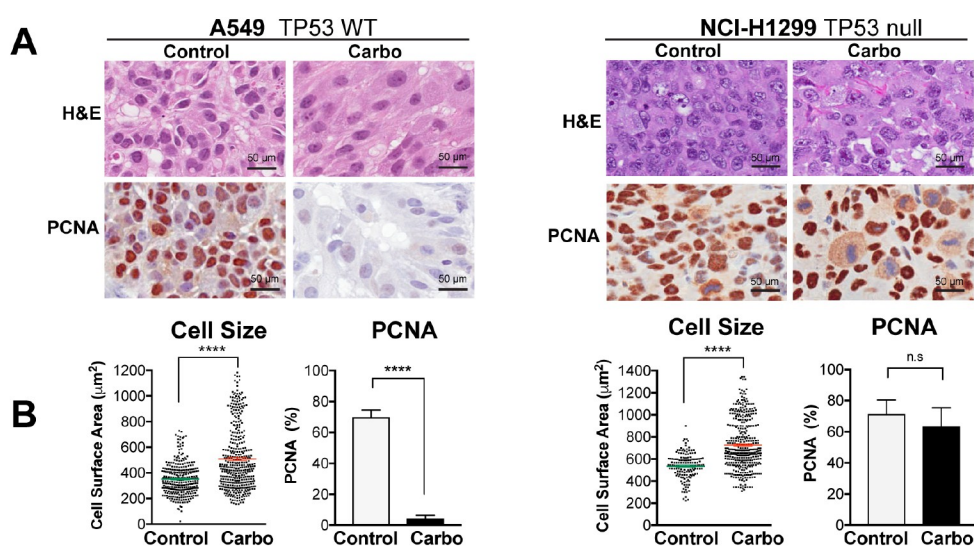

Figure 4

Rajal et al 2020

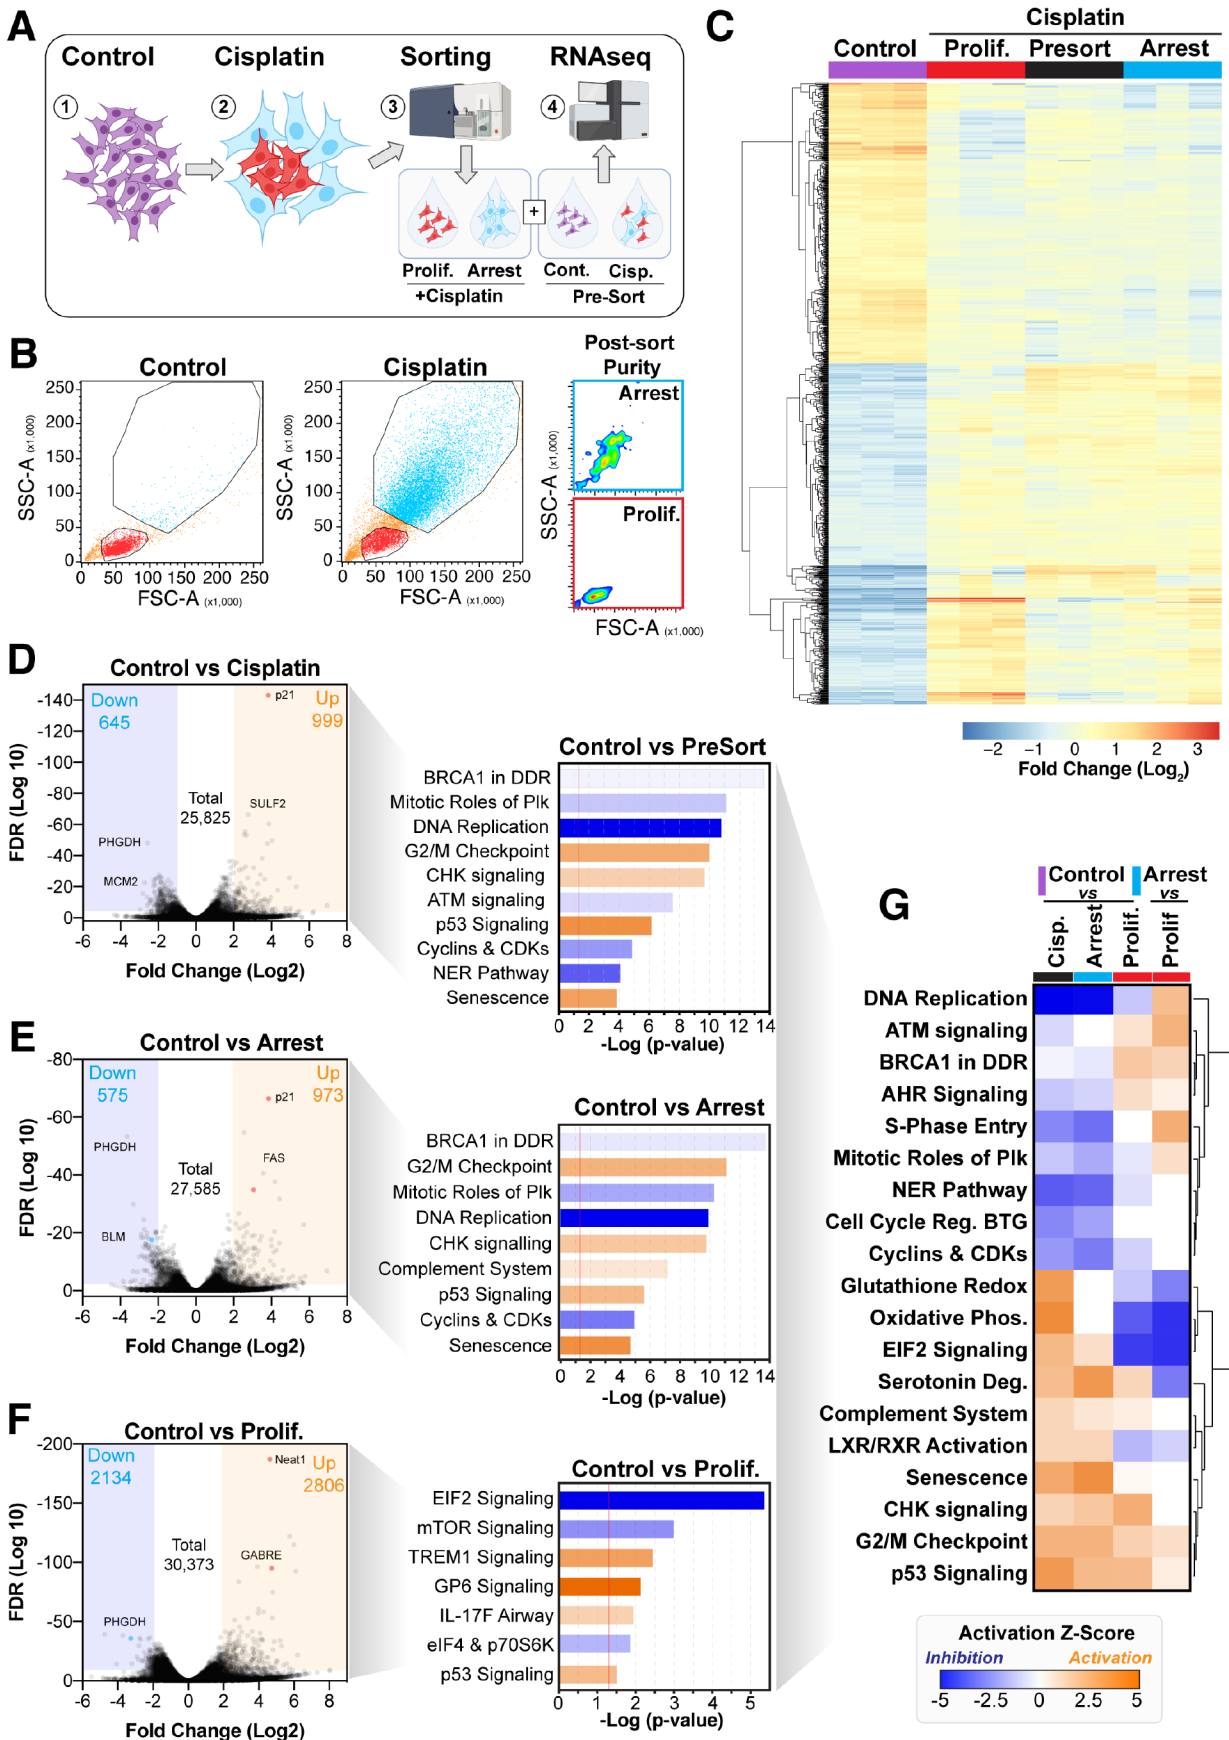

Figure 4 -Supplement 1

Rajal et al 2020

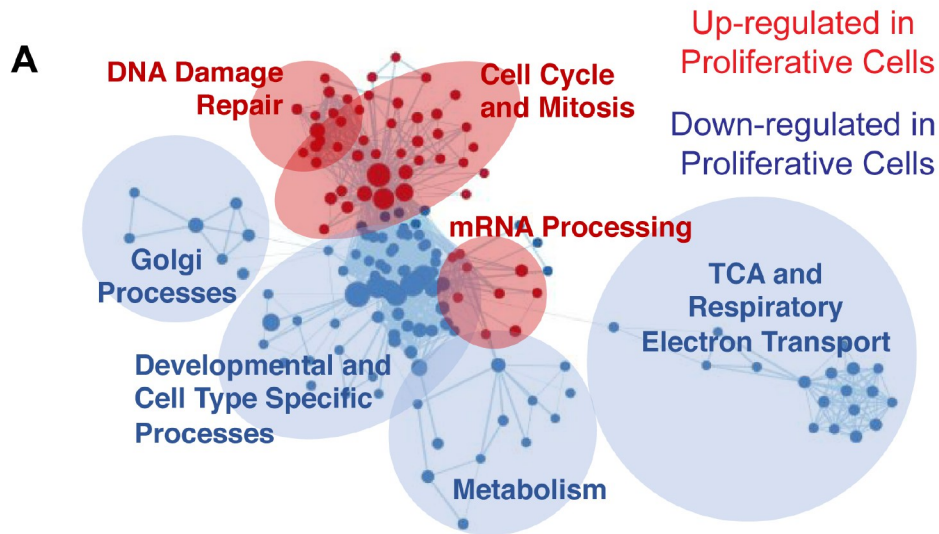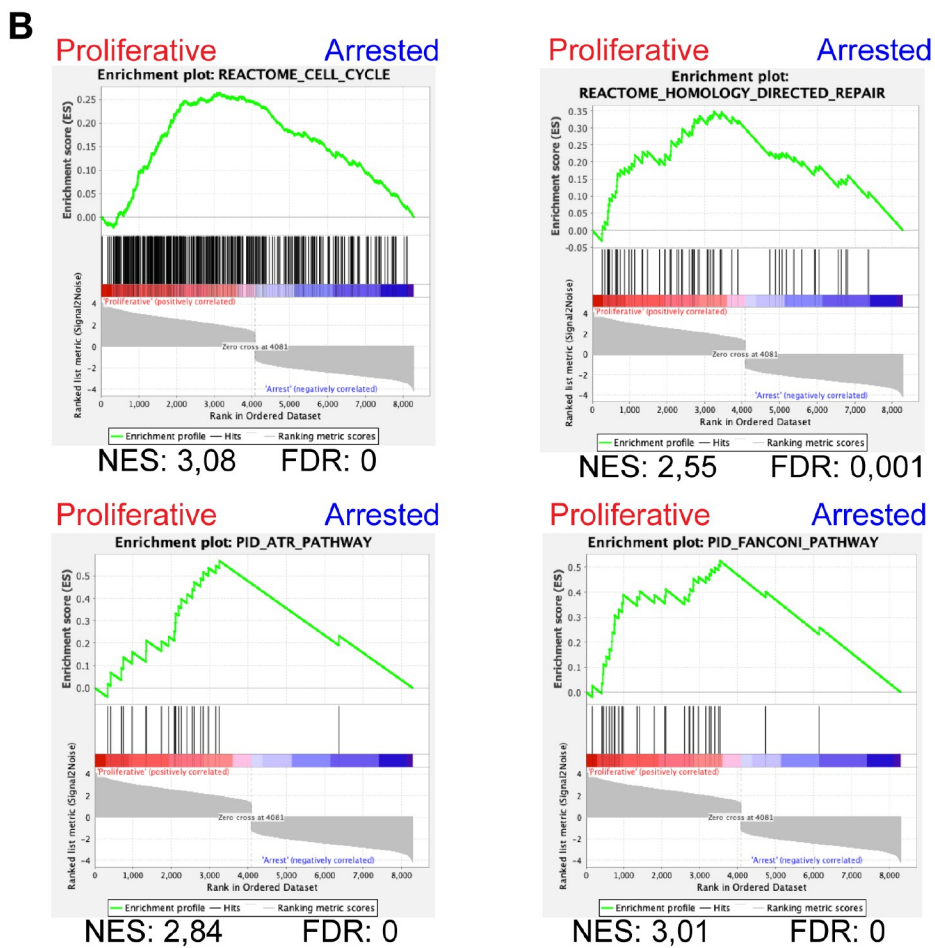

## Figure 5

Rajal et al 2020

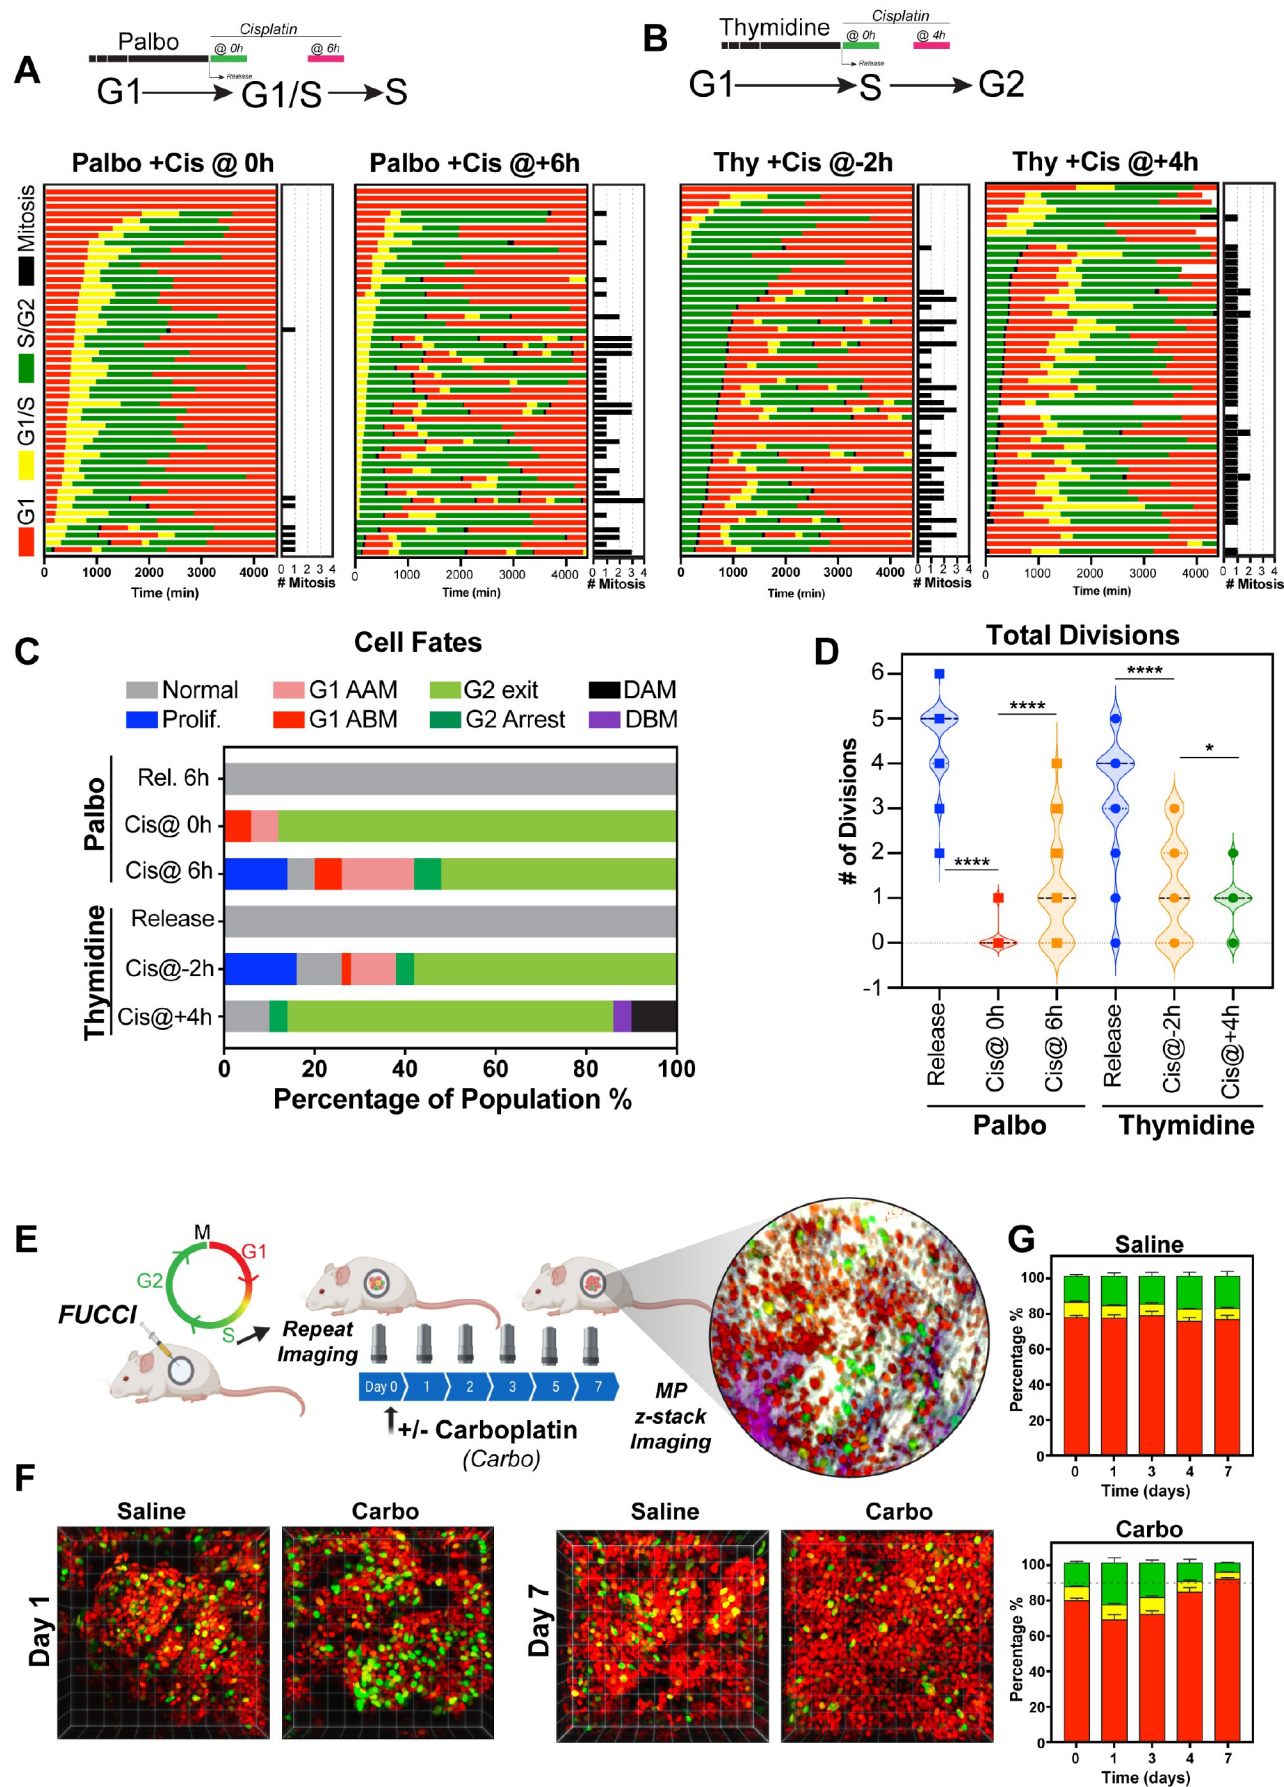

## Figure 5 - Supplement 1

Rajal et al 2020

**A**

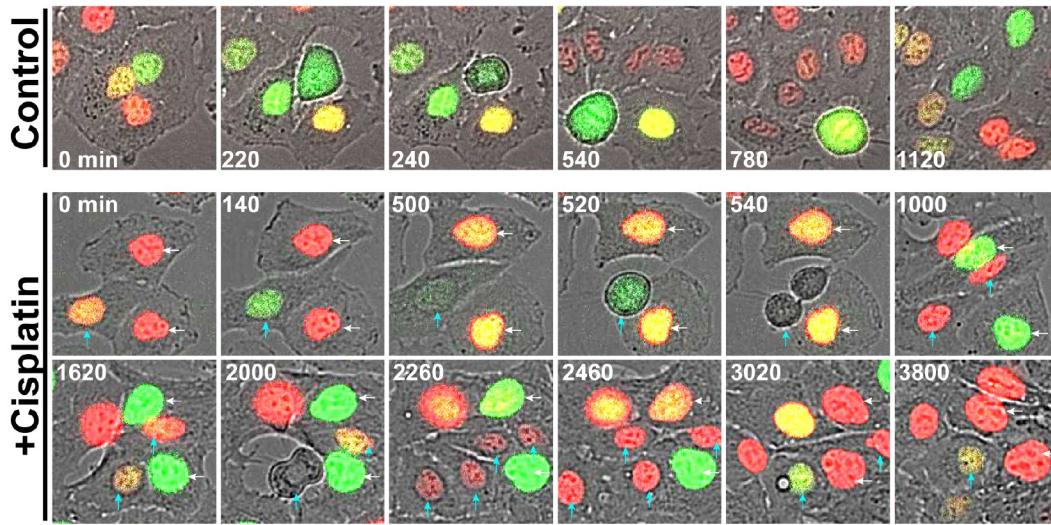

**B**

■ G1 ■ G1/S ■ S/G2 ■ Mitosis

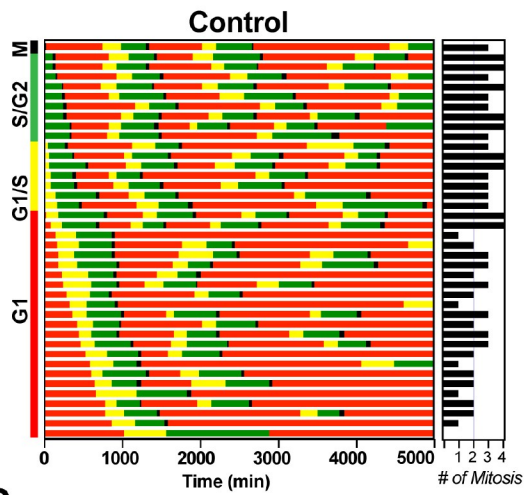

**C**

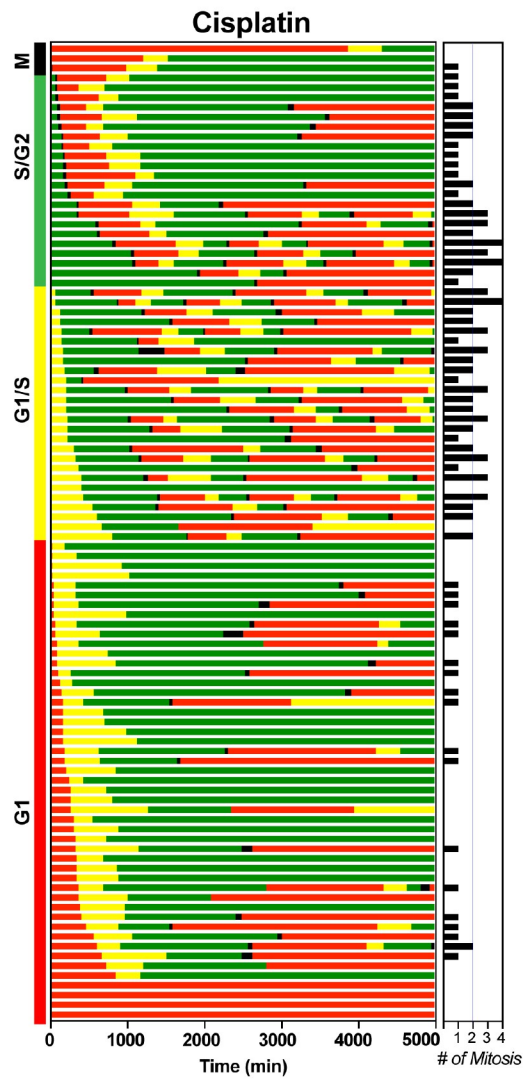

**D**

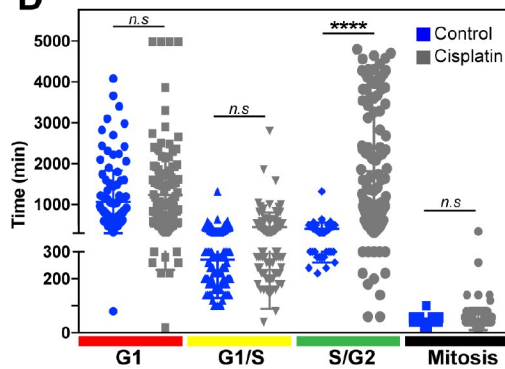

## Figure 6

Rajal et al 2020

**A**

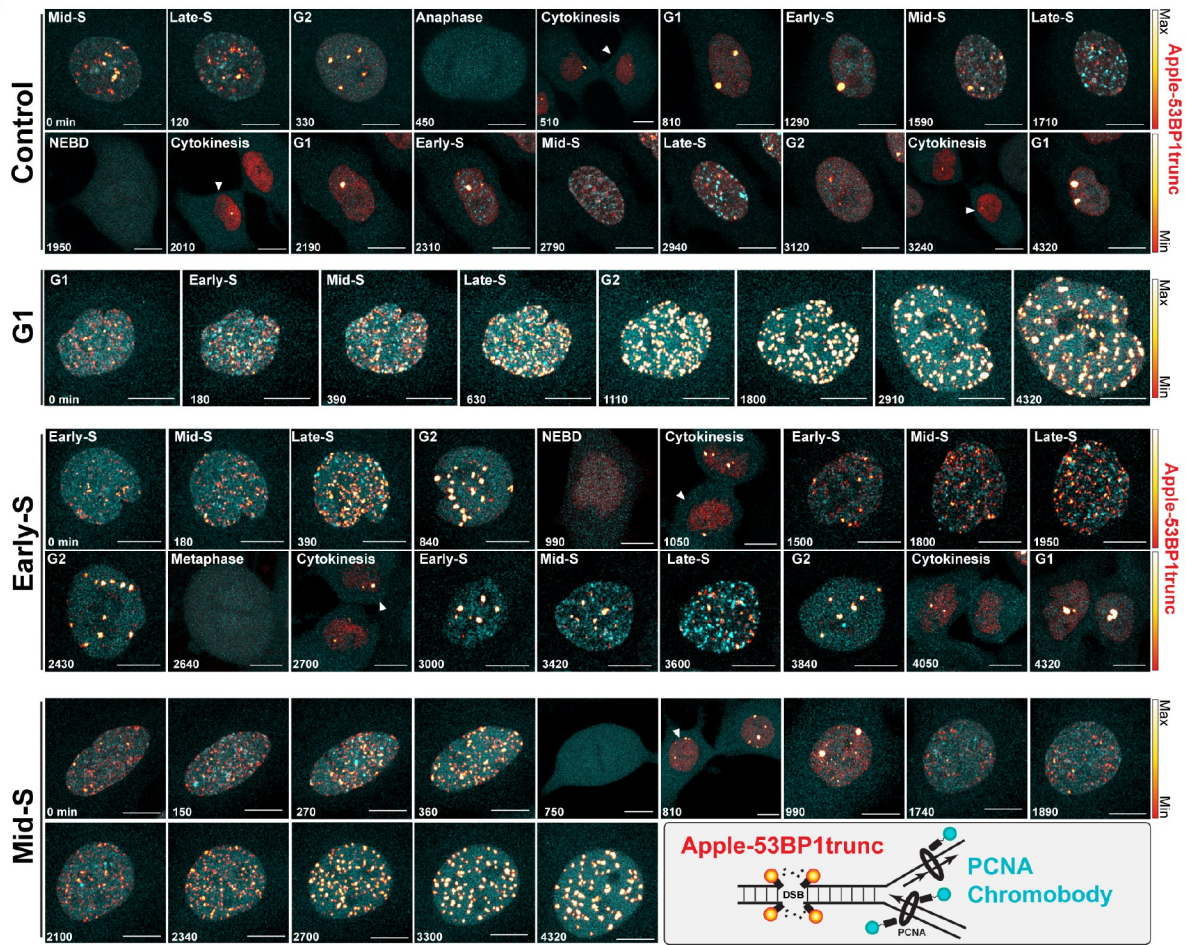

**B**

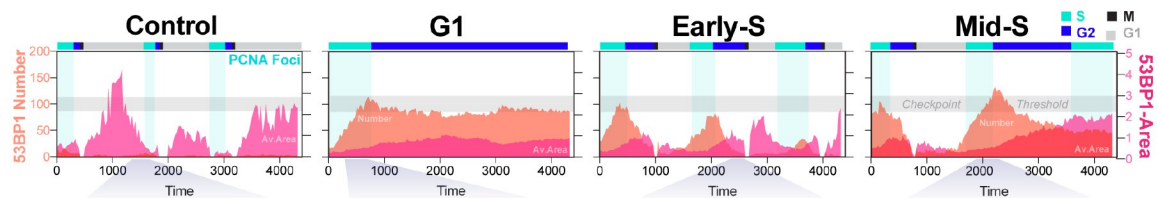

**C**

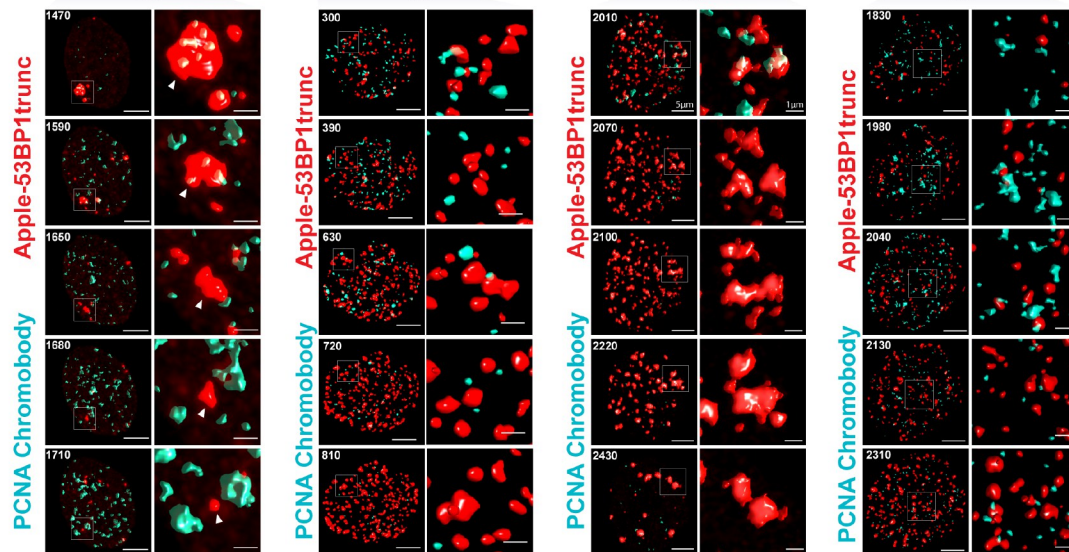



## Figure 6 -Supplement 1

Rajal et al 2020

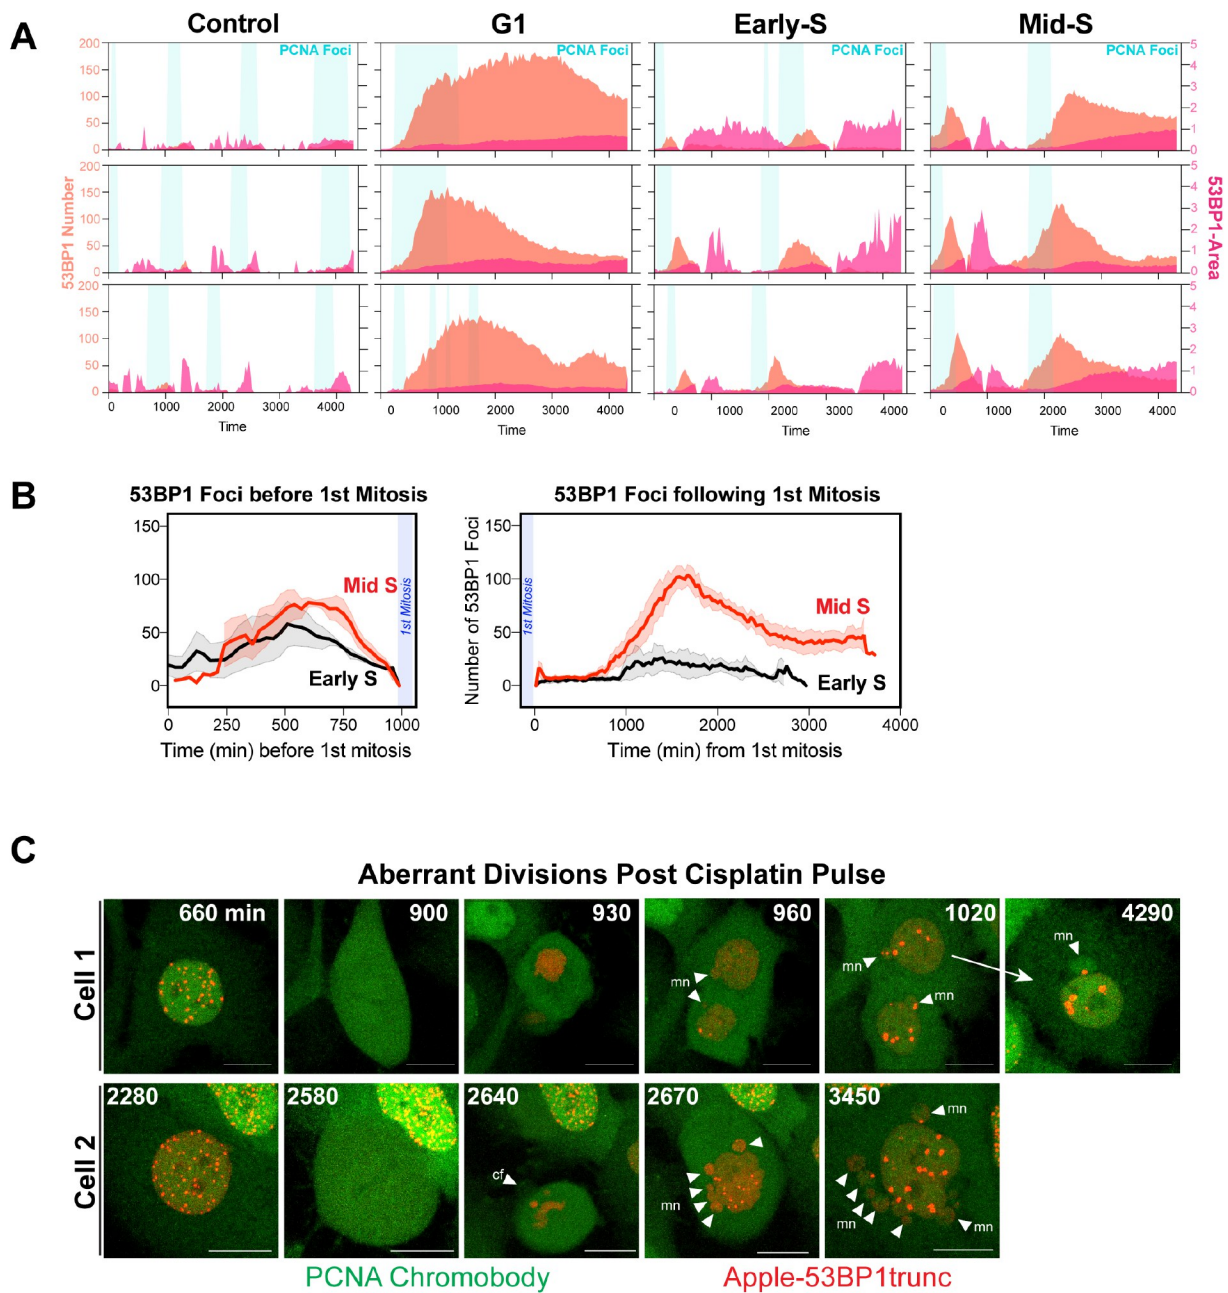

## Figure 7

Rajal et al 2020

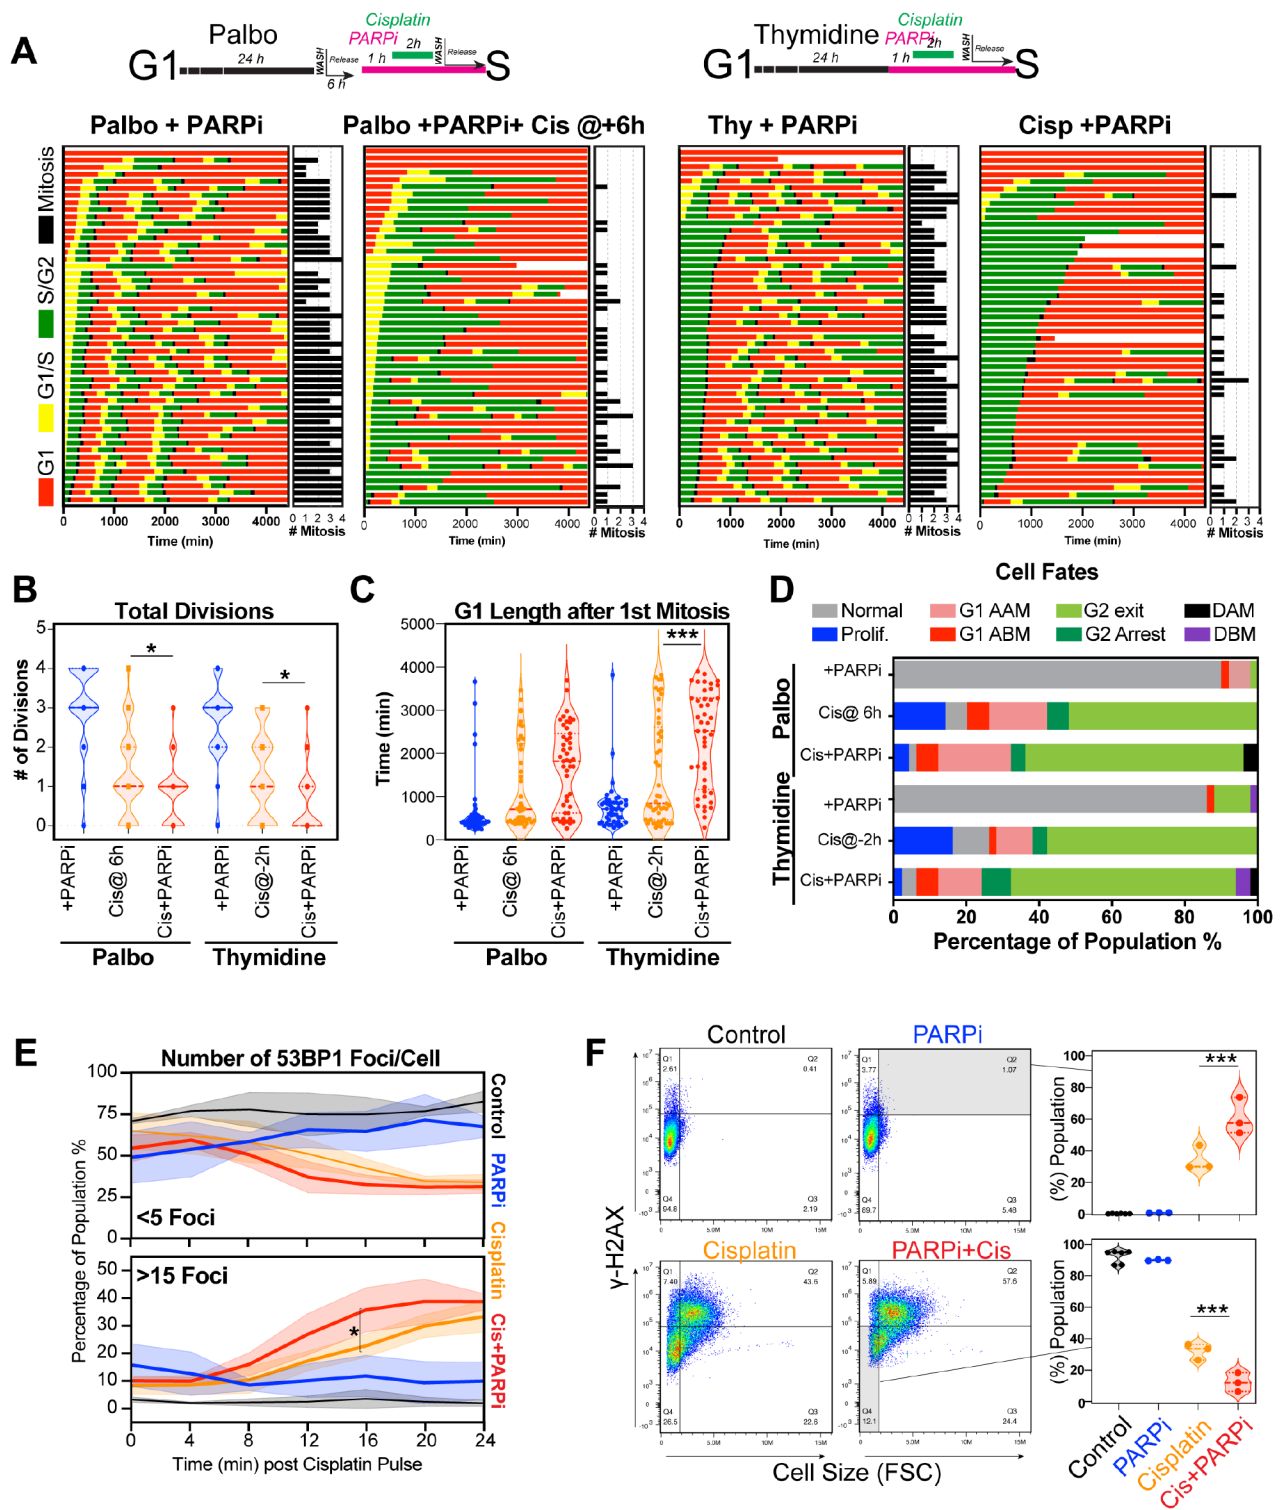

Figure 8

Rajal et al 2020

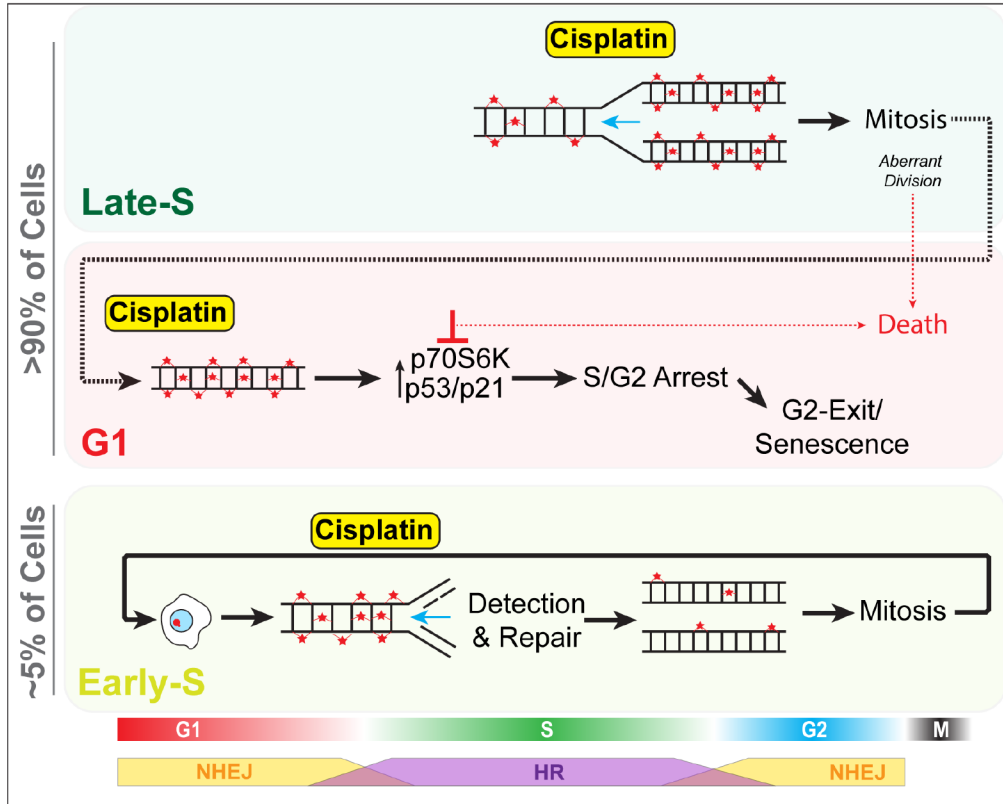

Source: https://biorxiv.org/content/10.1101/2020.11.26.400499v1.full.pdf
