# Supplementary material for: A Non-Genetic, Cell Cycle Dependent Mechanism of Platinum Resistance in Lung Adenocarcinoma
Source: bioRxiv preprint, doi:10.1101/2020.11.26.400499, version 2 (2021-05-05)
Supplement: Supplement Table 1 [file 400499_file21.xlsx]

## Sheet: Control vs Cisplatin
	Row.names	baseMean	log2FoldChange	lfcSE	stat	pvalue	padj	symbol	entrez	qValue	Control#1	Control#2	Control#3	Cisplatin#1	Cisplatin#2	Cisplatin#3
1	ENSG00000124762	2982.07	3.83544	0.147914	25.9302	3.0446e-148	4.73405e-144	CDKN1A	1026	7.86298e-144	370	340	461	5552	4949	6221
2	ENSG00000196562	522.667	2.76468	0.154976	17.8393	3.49833e-71	2.71978e-67	SULF2	55959	4.51739e-67	132	136	133	968	797	970
3	ENSG00000265962	200.606	3.86472	0.226879	17.0343	4.57178e-65	2.36955e-61	GACAT2	100287082	3.93569e-61	26	28	25	345	448	332
4	ENSG00000197614	903.159	2.61559	0.159883	16.3594	3.72887e-60	1.4495e-56	MFAP5	8076	2.40754e-56	291	201	268	1421	1691	1546
5	ENSG00000108602	5863.72	2.56186	0.159596	16.0522	5.52159e-58	1.7171e-54	ALDH3A1	218	2.85201e-54	1894	1574	1625	11217	7578	11295
6	ENSG00000161513	767.296	2.67781	0.167421	15.9945	1.39605e-57	3.61787e-54	FDXR	2232	6.00907e-54	181	231	208	1258	1119	1607
7	ENSG00000268621	207.448	4.03159	0.260519	15.4752	5.1017e-54	1.13323e-50	AC006262.5	NA	1.88224e-50	18	23	31	328	319	526
8	ENSG00000092621	769.854	-2.56331	0.168295	-15.231	2.20232e-52	4.28048e-49	PHGDH	26227	7.10964e-49	1098	1428	1432	227	245	189
9	ENSG00000044012	183.107	3.79133	0.24998	15.1666	5.88798e-52	1.01725e-48	GUCA2B	2981	1.68959e-48	31	16	27	333	404	287
10	ENSG00000065618	129.81	3.51034	0.257437	13.6357	2.45528e-42	3.81772e-39	COL17A1	100126326	6.34101e-39	23	14	25	227	218	272
11	ENSG00000013588	6113.14	1.92526	0.144254	13.3463	1.24411e-40	1.7586e-37	GPRC5A	693199	2.92094e-37	2468	2661	2518	7775	11294	9963
12	ENSG00000108679	2318.34	1.74495	0.131255	13.2944	2.49523e-40	3.2332e-37	LGALS3BP	3959	5.37016e-37	1017	1050	1126	3335	3307	4075
13	ENSG00000185088	2474.97	2.14822	0.163025	13.1772	1.1872e-39	1.41998e-36	RPS27L	51065	2.35851e-36	792	803	1137	3973	3518	4626
14	ENSG00000055163	533.093	1.98286	0.15428	12.8523	8.34726e-38	9.27082e-35	CYFIP2	26999	1.53983e-34	195	220	230	797	790	967
15	ENSG00000148346	422.583	2.63634	0.207689	12.6936	6.41321e-37	6.64793e-34	LCN2	3934	1.10418e-33	78	151	122	668	673	844
16	ENSG00000174307	621.004	1.8416	0.146515	12.5694	3.11142e-36	2.84804e-33	PHLDA3	23612	4.73043e-33	256	286	269	891	928	1096
17	ENSG00000107796	141.383	3.0596	0.243418	12.5693	3.11382e-36	2.84804e-33	ACTA2	59	4.73043e-33	34	27	28	216	225	317
18	ENSG00000100342	354.113	2.45506	0.19775	12.4149	2.16849e-35	1.87322e-32	APOL1	8542	3.11131e-32	118	94	113	551	478	771
19	ENSG00000152137	216.432	2.29096	0.187049	12.2479	1.72429e-34	1.41111e-31	HSPB8	26353	2.34377e-31	73	73	76	359	398	320
20	ENSG00000140545	404.523	1.97218	0.165395	11.9241	8.86797e-33	6.89441e-30	MFGE8	4240	1.14512e-29	159	176	158	546	651	738
21	ENSG00000109072	1618.38	1.78504	0.152696	11.6901	1.43137e-31	1.05983e-28	VTN	7448	1.76032e-28	849	673	659	2564	2128	2838
22	ENSG00000224259	87.4607	3.417	0.292915	11.6655	1.91251e-31	1.35171e-28	LINC01133	100505633	2.24511e-28	13	11	21	159	152	169
23	ENSG00000166508	1060.07	-1.96528	0.168892	-11.6363	2.69444e-31	1.82156e-28	MCM7	4176	3.0255e-28	1734	2015	1311	429	406	466
24	ENSG00000089685	593.233	-1.8794	0.164508	-11.4244	3.15758e-30	2.04572e-27	BIRC5	332	3.39782e-27	907	1087	804	241	256	264
25	ENSG00000113732	1290.51	1.38414	0.121213	11.419	3.36003e-30	2.0898e-27	ATP6V0E1	8992	3.47104e-27	726	682	737	1854	1898	1846
26	ENSG00000244509	754.504	1.54062	0.135314	11.3855	4.93774e-30	2.95296e-27	APOBEC3C	27350	4.9047e-27	359	387	411	1137	1064	1169
27	ENSG00000161544	63.218	4.94295	0.437922	11.2873	1.51628e-29	8.73207e-27	CYGB	114757	1.45035e-26	2	3	7	99	119	149
28	ENSG00000148773	1980.06	-1.98447	0.17608	-11.2703	1.83996e-29	1.02177e-26	MKI67	4288	1.6971e-26	3832	3372	2285	792	874	725
29	ENSG00000171992	1575.59	1.52496	0.13545	11.2584	2.10432e-29	1.12828e-26	SYNPO	11346	1.874e-26	886	822	727	2177	2245	2596
30	ENSG00000065357	151.652	2.74351	0.2442	11.2347	2.75532e-29	1.42808e-26	DGKA	1606	2.37196e-26	34	34	50	237	220	335
31	ENSG00000117724	564.174	-1.81149	0.161854	-11.1921	4.45818e-29	2.16908e-26	CENPF	1063	3.60272e-26	948	914	779	241	281	222
32	ENSG00000166851	622.591	-2.09653	0.187325	-11.192	4.46399e-29	2.16908e-26	PLK1	5347	3.60272e-26	1047	1201	784	270	242	191
33	ENSG00000175567	719.459	1.61828	0.14472	11.1821	4.98698e-29	2.34977e-26	UCP2	7351	3.90284e-26	350	389	319	1076	996	1186
34	ENSG00000265190	1868.15	1.46641	0.13118	11.1786	5.19051e-29	2.37374e-26	ANXA8	107984085	3.94265e-26	966	1116	894	2733	2608	2891
35	ENSG00000264230	1591.55	1.43907	0.130149	11.0571	2.02636e-28	9.00227e-26	ANXA8L1	728113	1.49523e-25	830	948	792	2316	2184	2478
36	ENSG00000042445	960.745	1.61974	0.146568	11.0511	2.16433e-28	9.34811e-26	RETSAT	54884	1.55267e-25	512	421	480	1495	1256	1602
37	ENSG00000157456	365.114	-2.15735	0.195325	-11.0449	2.31905e-28	9.74564e-26	CCNB2	9133	1.6187e-25	578	658	561	160	147	86
38	ENSG00000144452	71.9816	3.65255	0.330833	11.0405	2.43754e-28	9.97401e-26	ABCA12	26154	1.65663e-25	11	8	13	145	154	101
39	ENSG00000148180	676.385	1.78325	0.162445	10.9776	4.89891e-28	1.95316e-25	GSN	2934	3.24408e-25	300	258	353	971	961	1214
40	ENSG00000088325	1179.41	-1.4812	0.13511	-10.963	5.75805e-28	2.2383e-25	TPX2	22974	3.71768e-25	1801	1819	1597	642	657	562
41	ENSG00000175832	232.341	-2.24094	0.204862	-10.9388	7.52126e-28	2.85239e-25	ETV4	2118	4.73766e-25	378	375	391	89	65	96
42	ENSG00000126005	625.832	1.60393	0.148132	10.8277	2.54498e-27	9.42189e-25	MMP24-AS1	NA	1.56492e-24	303	321	302	935	826	1068
43	ENSG00000184575	758.863	-1.90443	0.177736	-10.7149	8.66098e-27	3.13185e-24	XPOT	11260	5.20183e-24	1053	1191	1362	293	400	254
44	ENSG00000173207	384.728	-1.84194	0.172774	-10.661	1.54888e-26	5.47354e-24	CKS1B	1163	9.09123e-24	580	672	555	188	165	149
45	ENSG00000073111	252.824	-2.72898	0.258051	-10.5754	3.87677e-26	1.33955e-23	MCM2	4171	2.22492e-23	484	552	284	77	67	53
46	ENSG00000010292	896.035	-1.65884	0.157842	-10.5095	7.80935e-26	2.63973e-23	NCAPD2	9918	4.38444e-23	1409	1548	1126	473	415	405
47	ENSG00000111206	607.59	-2.22355	0.211998	-10.4885	9.75258e-26	3.22644e-23	FOXM1	2305	5.35894e-23	1124	1193	693	213	256	166
48	ENSG00000189403	1395.57	-1.32622	0.126469	-10.4865	9.96394e-26	3.2277e-23	HMGB1	3146	5.36102e-23	1958	2100	1923	804	750	839
49	ENSG00000100297	689.933	-1.86751	0.178306	-10.4736	1.14196e-25	3.62374e-23	MCM5	4174	6.01882e-23	1096	1314	843	284	321	282
50	ENSG00000187837	613.671	2.37463	0.227165	10.4534	1.41438e-25	4.39843e-23	HIST1H1C	3006	7.30554e-23	157	159	277	942	784	1362
51	ENSG00000115129	622.575	1.51085	0.14506	10.4153	2.11151e-25	6.43762e-23	TP53I3	9540	1.06925e-22	311	318	339	942	816	1010
52	ENSG00000153029	82.1172	3.27036	0.314611	10.3949	2.61464e-25	7.81829e-23	MR1	3140	1.29857e-22	10	13	25	148	154	144
53	ENSG00000169894	243.433	1.93413	0.186407	10.3758	3.19438e-25	9.37158e-23	MUC3A	4584	1.55657e-22	113	88	101	354	362	443
54	ENSG00000128335	384.311	1.69081	0.163188	10.3611	3.72551e-25	1.07274e-22	APOL2	23780	1.78176e-22	187	161	195	558	542	662
55	ENSG00000169903	4201.31	1.31573	0.127137	10.3489	4.2324e-25	1.19654e-22	TM4SF4	7104	1.98738e-22	2589	2132	2500	6291	5515	6180
56	ENSG00000198467	3229.94	1.57782	0.152777	10.3276	5.28658e-25	1.46788e-22	TPM2	7169	2.43806e-22	1487	1582	1790	4411	4156	5954
57	ENSG00000196154	2557.62	1.6043	0.155918	10.2894	7.86598e-25	2.14576e-22	S100A4	6275	3.56398e-22	1176	1139	1481	4348	3132	4070
58	ENSG00000138160	334.807	-2.16511	0.212586	-10.1846	2.32244e-24	6.22614e-22	KIF11	3832	1.03413e-21	606	598	449	112	157	88
59	ENSG00000172890	765.773	1.47486	0.145053	10.1678	2.76152e-24	7.27777e-22	NADSYN1	55191	1.2088e-21	401	382	429	1121	989	1272
60	ENSG00000125730	4552.31	1.63163	0.161484	10.104	5.30504e-24	1.3748e-21	C3	718	2.28347e-21	2034	2644	1982	6569	5734	8351
61	ENSG00000090889	366.652	-1.65684	0.16415	-10.0935	5.90442e-24	1.50505e-21	KIF4A	24137	2.49979e-21	588	555	526	187	170	174
62	ENSG00000149809	370.978	1.75215	0.17422	10.0571	8.54705e-24	2.14352e-21	TM7SF2	7108	3.56026e-21	175	153	178	572	475	672
63	ENSG00000198826	292.086	-2.2523	0.224144	-10.0484	9.33315e-24	2.30351e-21	ARHGAP11A	9824	3.826e-21	536	530	392	110	125	60
64	ENSG00000132274	46.5716	5.32003	0.533749	9.96729	2.11932e-23	5.14896e-21	TRIM22	10346	8.55213e-21	4	1	1	89	81	103
65	ENSG00000169908	5996.08	1.25312	0.126315	9.9206	3.38708e-23	8.10242e-21	TM4SF1	4071	1.34576e-20	3454	3248	3933	7833	9155	8354
66	ENSG00000117472	123.174	2.52526	0.25493	9.90573	3.93108e-23	9.26127e-21	TSPAN1	10103	1.53824e-20	37	27	44	239	165	227
67	ENSG00000166986	1492.06	-1.43245	0.145416	-9.85067	6.80877e-23	1.58014e-20	MARS	102465454	2.62453e-20	1873	2152	2502	832	742	851
68	ENSG00000012171	877.133	1.56996	0.159651	9.83368	8.06185e-23	1.84344e-20	SEMA3B	102465526	3.06184e-20	546	392	386	1301	1240	1398
69	ENSG00000102265	1794.87	1.3908	0.141509	9.82832	8.50283e-23	1.91609e-20	TIMP1	7076	3.18252e-20	986	864	1121	2656	2317	2826
70	ENSG00000109685	516.476	-1.71236	0.174256	-9.82672	8.63869e-23	1.9189e-20	WHSC1	7468	3.18718e-20	813	919	646	253	252	217
71	ENSG00000101057	789.19	-1.79862	0.183161	-9.81989	9.24484e-23	2.02462e-20	MYBL2	4605	3.36278e-20	1325	1466	889	361	362	332
72	ENSG00000162645	155.245	2.21906	0.226704	9.78839	1.26296e-22	2.72747e-20	GBP2	2634	4.53017e-20	56	43	64	222	237	310
73	ENSG00000161714	1456.58	1.30157	0.133338	9.76147	1.64752e-22	3.50923e-20	PLCD3	113026	5.82863e-20	815	885	819	1899	1964	2357
74	ENSG00000204257	184.027	2.411	0.248022	9.72093	2.45524e-22	5.15899e-20	HLA-DMA	3108	8.56879e-20	50	46	78	354	221	355
75	ENSG00000168487	703.474	1.40726	0.145255	9.68825	3.38283e-22	7.01329e-20	BMP1	649	1.16487e-19	397	351	405	951	961	1156
76	ENSG00000134057	848.603	-1.57535	0.163059	-9.66124	4.40505e-22	9.01238e-20	CCNB1	891	1.4969e-19	1264	1371	1189	455	493	320
77	ENSG00000076003	447.266	-1.94784	0.201725	-9.6559	4.6406e-22	9.37099e-20	MCM6	4175	1.55647e-19	745	812	585	178	233	131
78	ENSG00000159388	126.323	2.26107	0.234627	9.63687	5.58636e-22	1.11362e-19	BTG2	7832	1.84966e-19	46	48	38	228	234	164
79	ENSG00000233276	2071.29	1.55786	0.162663	9.57724	9.96731e-22	1.96179e-19	GPX1	2876	3.25843e-19	974	1221	951	3323	2417	3541
80	ENSG00000163453	87.304	2.61258	0.273901	9.5384	1.45056e-21	2.81934e-19	IGFBP7	3490	4.68276e-19	30	23	21	169	128	154
81	ENSG00000131747	976.973	-1.68069	0.176369	-9.52942	1.58157e-21	3.03603e-19	TOP2A	7153	5.04268e-19	1620	1628	1231	441	573	368
82	ENSG00000113368	292.267	-1.88917	0.198941	-9.49614	2.17813e-21	4.13022e-19	LMNB1	4001	6.86005e-19	429	558	391	122	117	136
83	ENSG00000144028	2001.15	-1.15761	0.121976	-9.49048	2.29973e-21	4.30825e-19	SNRNP200	23020	7.15576e-19	2917	2730	2638	1224	1183	1315
84	ENSG00000142945	200.532	-1.95295	0.205832	-9.48806	2.35365e-21	4.35678e-19	KIF2C	11004	7.23636e-19	337	333	288	89	85	71
85	ENSG00000114378	1277.22	1.42458	0.150774	9.44841	3.44023e-21	6.29319e-19	HYAL1	3373	1.04526e-18	844	639	596	1933	1846	1806
86	ENSG00000228716	797.591	-1.50417	0.159306	-9.44198	3.6581e-21	6.61393e-19	DHFR	1719	1.09854e-18	1215	1249	1085	440	475	322
87	ENSG00000188153	212.568	1.8014	0.191112	9.42591	4.26412e-21	7.62101e-19	COL4A5	1287	1.26581e-18	112	90	81	314	328	350
88	ENSG00000012779	41.8713	4.33797	0.46042	9.42176	4.43576e-21	7.83768e-19	ALOX5	240	1.30179e-18	5	4	3	70	72	98
89	ENSG00000140297	1642.58	1.1124	0.118185	9.41234	4.8519e-21	8.47665e-19	GCNT3	9245	1.40792e-18	1072	1012	1033	2327	2238	2173
90	ENSG00000185950	458.926	-1.45429	0.156091	-9.31694	1.19744e-20	2.06877e-18	IRS2	8660	3.43611e-18	705	687	630	235	267	229
91	ENSG00000101439	2173.33	1.2229	0.131469	9.30182	1.38061e-20	2.35902e-18	CST3	1471	3.9182e-18	1239	1225	1444	3136	2737	3259
92	ENSG00000132821	193.345	2.10456	0.226572	9.28867	1.56234e-20	2.64052e-18	VSTM2L	128434	4.38576e-18	73	49	97	307	312	322
93	ENSG00000079616	319.887	-1.90033	0.205089	-9.26586	1.93512e-20	3.2354e-18	KIF22	3835	5.37382e-18	493	557	453	138	99	179
94	ENSG00000182165	66.378	2.98575	0.322827	9.24875	2.27125e-20	3.75699e-18	TP53TG1	NA	6.24014e-18	13	18	13	117	91	146
95	ENSG00000117632	775.921	-1.29257	0.139842	-9.24305	2.39563e-20	3.92102e-18	STMN1	100500808	6.51259e-18	1132	1040	1130	488	414	451
96	ENSG00000136824	235.246	-1.92477	0.208381	-9.23677	2.54046e-20	4.0893e-18	SMC2	10592	6.7921e-18	401	375	350	98	120	68
97	ENSG00000011426	514.658	-1.76726	0.191338	-9.23633	2.55105e-20	4.0893e-18	ANLN	54443	6.7921e-18	852	920	622	242	270	181
98	ENSG00000203812	145.856	2.25503	0.244437	9.22542	2.82441e-20	4.4813e-18	HIST2H2AA3	8337	7.44319e-18	36	48	68	263	206	254
99	ENSG00000149136	2163.26	-1.28622	0.139455	-9.22317	2.88446e-20	4.53035e-18	SSRP1	6749	7.52465e-18	3061	3327	2807	1291	1081	1413
100	ENSG00000120802	596.309	-1.93205	0.210443	-9.18089	4.27549e-20	6.64795e-18	TMPO	7112	1.10419e-17	1041	949	858	277	314	139
101	ENSG00000150687	4828.21	1.01941	0.11116	9.17065	4.7016e-20	7.23813e-18	PRSS23	11098	1.20221e-17	3193	3056	3321	6302	6517	6581
102	ENSG00000272196	145.966	2.24883	0.245338	9.16626	4.89703e-20	7.46509e-18	HIST2H2AA4	723790	1.23991e-17	36	48	68	263	206	254
103	ENSG00000140525	328.991	-1.81798	0.198385	-9.1639	5.00538e-20	7.55618e-18	FANCI	55215	1.25504e-17	544	576	425	160	163	106
104	ENSG00000169679	190.637	-2.20981	0.241216	-9.16115	5.13477e-20	7.67697e-18	BUB1	699	1.2751e-17	351	341	255	56	88	53
105	ENSG00000148175	897.828	1.31727	0.144128	9.1396	6.26838e-20	9.28258e-18	STOM	2040	1.54178e-17	473	474	597	1212	1354	1277
106	ENSG00000151640	138.784	2.1893	0.23957	9.13847	6.33394e-20	9.29117e-18	DPYSL4	10570	1.54321e-17	54	58	37	187	220	277
107	ENSG00000174231	3854.72	-1.1239	0.123102	-9.12983	6.8604e-20	9.96938e-18	PRPF8	10594	1.65586e-17	5821	5154	4876	2541	2320	2415
108	ENSG00000271447	125.269	2.33447	0.257036	9.08225	1.06351e-19	1.53116e-17	MMP28	79148	2.54317e-17	54	28	41	215	175	239
109	ENSG00000125107	1070.97	-1.39786	0.154253	-9.06208	1.27982e-19	1.82567e-17	CNOT1	23019	3.03234e-17	1715	1513	1442	570	695	491
110	ENSG00000085063	924.336	1.29517	0.143442	9.02921	1.72908e-19	2.44414e-17	CD59	966	4.05957e-17	595	453	558	1265	1322	1355
111	ENSG00000122952	366.617	-1.53487	0.170028	-9.02714	1.76209e-19	2.46836e-17	ZWINT	11130	4.0998e-17	587	566	486	201	194	166
112	ENSG00000051523	1349.54	1.23313	0.136686	9.02162	1.8532e-19	2.5728e-17	CYBA	1535	4.27327e-17	739	814	859	1861	1698	2126
113	ENSG00000196502	173.958	1.9757	0.219184	9.01388	1.9889e-19	2.73677e-17	SULT1A1	6817	4.54561e-17	67	58	85	288	228	317
114	ENSG00000179046	145.301	2.09833	0.233263	8.99552	2.35109e-19	3.20676e-17	TRIML2	205860	5.32625e-17	42	65	58	195	235	277
115	ENSG00000126787	239.543	-2.18589	0.243311	-8.98393	2.61275e-19	3.53267e-17	DLGAP5	9787	5.86756e-17	419	410	360	75	125	48
116	ENSG00000161800	303.518	-1.88007	0.209329	-8.98141	2.67312e-19	3.5604e-17	RACGAP1	29127	5.91363e-17	536	513	388	155	140	88
117	ENSG00000114346	442.713	-1.84063	0.204943	-8.98117	2.67906e-19	3.5604e-17	ECT2	1894	5.91363e-17	768	738	582	178	254	136
118	ENSG00000197582	278.148	1.58865	0.177609	8.94462	3.73243e-19	4.91826e-17	GPX1P1	NA	8.16895e-17	133	146	136	457	349	448
119	ENSG00000123416	2076.87	-1.66692	0.186608	-8.93276	4.15499e-19	5.42908e-17	TUBA1B	10376	9.01739e-17	3581	3775	2123	1066	1020	897
120	ENSG00000142669	854.292	1.50692	0.168796	8.92746	4.35919e-19	5.64842e-17	SH3BGRL3	83442	9.3817e-17	394	457	480	1106	1090	1599
121	ENSG00000197747	7339.25	1.24187	0.139397	8.9089	5.15421e-19	6.62337e-17	S100A10	6281	1.1001e-16	4222	4010	4849	10535	8736	11683
122	ENSG00000174939	333.522	1.44108	0.161789	8.90714	5.23663e-19	6.67413e-17	ASPHD1	253982	1.10853e-16	185	169	182	464	454	546
123	ENSG00000166147	117.255	2.25328	0.253723	8.88087	6.63419e-19	8.38659e-17	FBN1	2200	1.39296e-16	53	31	38	162	211	209
124	ENSG00000135679	725.591	1.54283	0.173846	8.87468	7.01356e-19	8.79466e-17	MDM2	4193	1.46074e-16	351	368	397	839	1356	1043
125	ENSG00000211584	507.323	1.31763	0.148651	8.86387	7.72805e-19	9.61308e-17	SLC48A1	55652	1.59668e-16	306	298	266	717	667	791
126	ENSG00000141378	375.306	1.43157	0.162104	8.83122	1.03541e-18	1.27775e-16	PTRH2	51651	2.12227e-16	192	224	192	607	495	541
127	ENSG00000085563	258.201	1.61122	0.182756	8.81624	1.1837e-18	1.44924e-16	ABCB1	5243	2.4071e-16	137	121	127	361	459	345
128	ENSG00000185222	389.999	1.39362	0.158282	8.80464	1.31272e-18	1.59465e-16	TCEAL9	51186	2.64862e-16	216	209	217	565	498	635
129	ENSG00000125657	92.4807	2.30269	0.261595	8.80252	1.33775e-18	1.61245e-16	TNFSF9	8744	2.67819e-16	27	38	28	134	149	179
130	ENSG00000167325	741.138	-1.37915	0.156835	-8.79366	1.44769e-18	1.73155e-16	RRM1	6240	2.876e-16	1165	1155	896	405	445	380
131	ENSG00000135842	86.1747	-2.8088	0.319533	-8.79032	1.49129e-18	1.77008e-16	FAM129A	116496	2.94001e-16	135	163	159	21	27	13
132	ENSG00000105290	969.923	1.49291	0.170055	8.779	1.64933e-18	1.94283e-16	APLP1	333	3.22694e-16	486	458	578	1245	1239	1813
133	ENSG00000117399	463.45	-1.86829	0.21343	-8.75364	2.06585e-18	2.41518e-16	CDC20	991	4.01148e-16	782	909	496	185	228	181
134	ENSG00000163071	46.0279	3.29482	0.37719	8.73518	2.43279e-18	2.82294e-16	SPATA18	132671	4.68874e-16	10	8	9	77	103	71
135	ENSG00000156802	290.645	-1.9068	0.218523	-8.72588	2.64116e-18	3.04203e-16	ATAD2	29028	5.05264e-16	526	496	363	110	156	93
136	ENSG00000101000	820.987	1.4037	0.161134	8.71133	3.00322e-18	3.43361e-16	PROCR	10544	5.70303e-16	385	493	470	1123	1032	1423
137	ENSG00000180879	2504.59	1.2445	0.143249	8.6877	3.69835e-18	4.19749e-16	SSR4	6748	6.97179e-16	1423	1327	1706	3762	3041	3768
138	ENSG00000146918	211.324	-1.83329	0.211544	-8.66621	4.46744e-18	5.03364e-16	NCAPG2	54892	8.36059e-16	357	367	268	96	95	86
139	ENSG00000115902	290.586	-1.82686	0.211082	-8.65476	4.93956e-18	5.52555e-16	SLC1A4	6509	9.17763e-16	401	375	584	140	121	123
140	ENSG00000137673	128.853	2.13229	0.246627	8.64582	5.34193e-18	5.93298e-16	MMP7	4316	9.85434e-16	52	34	58	178	242	209
141	ENSG00000165304	233.003	-1.739	0.201238	-8.64151	5.54763e-18	6.11774e-16	MELK	9833	1.01612e-15	394	366	321	99	126	91
142	ENSG00000100526	258.297	-1.58387	0.183708	-8.62167	6.59837e-18	7.22521e-16	CDKN3	1033	1.20007e-15	404	380	380	150	125	111
143	ENSG00000196305	1332.75	-1.39875	0.162703	-8.59692	8.1887e-18	8.90392e-16	IARS	3376	1.47889e-15	1957	1990	1864	640	934	612
144	ENSG00000174371	206.614	-1.97581	0.229939	-8.59276	8.49018e-18	9.14676e-16	EXO1	9156	1.51922e-15	360	375	259	82	100	63
145	ENSG00000164754	541.515	-1.46243	0.170203	-8.59223	8.52968e-18	9.14676e-16	RAD21	100500914	1.51922e-15	817	780	799	295	345	214
146	ENSG00000185339	158.706	1.72533	0.20108	8.58029	9.46336e-18	1.00785e-15	TCN2	6948	1.67398e-15	72	72	76	251	217	264
147	ENSG00000026103	112.835	2.21815	0.259816	8.5374	1.37274e-17	1.45202e-15	FAS	355	2.41172e-15	46	38	37	152	245	159
148	ENSG00000171345	141.729	2.50718	0.294386	8.51663	1.64264e-17	1.72577e-15	KRT19	3880	2.86641e-15	31	51	45	133	254	337
149	ENSG00000076382	386.016	-1.53033	0.179775	-8.51244	1.70317e-17	1.77736e-15	SPAG5	10615	2.95209e-15	634	587	504	234	202	156
150	ENSG00000117650	146.801	-1.91221	0.225046	-8.49698	1.9459e-17	2.01712e-15	NEK2	4751	3.35032e-15	228	240	231	66	65	50
151	ENSG00000170373	244.454	2.31947	0.273369	8.48475	2.16191e-17	2.22619e-15	CST1	1469	3.69757e-15	70	51	123	471	276	476
152	ENSG00000137807	332.938	-1.71097	0.201726	-8.48168	2.21974e-17	2.27071e-15	KIF23	9493	3.77152e-15	535	584	419	171	178	111
153	ENSG00000072501	930.474	-1.2309	0.145199	-8.47735	2.30382e-17	2.34131e-15	SMC1A	8243	3.88879e-15	1460	1325	1131	579	556	531
154	ENSG00000167703	220.982	1.59356	0.188188	8.46792	2.49823e-17	2.5224e-15	SLC43A2	124935	4.18956e-15	124	106	98	302	318	378
155	ENSG00000166311	180.59	1.72059	0.203411	8.45869	2.70388e-17	2.69997e-15	SMPD1	6609	4.4845e-15	91	68	91	267	254	312
156	ENSG00000177106	826.836	1.1955	0.141337	8.45848	2.70883e-17	2.69997e-15	EPS8L2	64787	4.4845e-15	505	555	445	1158	1076	1221
157	ENSG00000141756	1012.44	1.26011	0.149015	8.45624	2.76141e-17	2.73485e-15	FKBP10	60681	4.54243e-15	625	565	594	1364	1227	1700
158	ENSG00000072274	681.355	-1.8735	0.222107	-8.43513	3.30833e-17	3.25578e-15	TFRC	7037	5.40766e-15	1173	1228	822	286	397	181
159	ENSG00000123989	495.199	1.19144	0.14146	8.42251	3.68515e-17	3.60379e-15	CHPF	79586	5.9857e-15	290	318	296	680	686	700
160	ENSG00000131153	236.799	-1.76188	0.209436	-8.4125	4.01364e-17	3.90051e-15	GINS2	51659	6.47852e-15	366	432	302	120	112	88
161	ENSG00000111602	452.086	-1.41074	0.167864	-8.40406	4.31315e-17	4.16554e-15	TIMELESS	8914	6.91872e-15	671	747	554	246	253	242
162	ENSG00000087586	753.399	-1.27646	0.152017	-8.3968	4.58823e-17	4.40385e-15	AURKA	6790	7.31455e-15	1145	1141	918	450	470	395
163	ENSG00000145833	678.261	-1.19266	0.142655	-8.36042	6.24973e-17	5.96178e-15	DDX46	9879	9.90218e-15	978	920	934	460	401	375
164	ENSG00000177084	291.537	-1.67258	0.200469	-8.34335	7.22132e-17	6.84661e-15	POLE	5426	1.13718e-14	483	507	344	147	143	126
165	ENSG00000176153	13636.4	1.33831	0.160501	8.33837	7.53241e-17	7.09827e-15	GPX2	2877	1.17898e-14	7794	6464	8926	21680	15349	21606
166	ENSG00000104774	272.784	1.5334	0.183969	8.33511	7.74291e-17	7.25268e-15	MAN2B1	4125	1.20463e-14	121	146	150	380	357	481
167	ENSG00000128510	78.0022	3.14202	0.378186	8.30813	9.72244e-17	9.05235e-15	CPA4	51200	1.50354e-14	21	23	5	115	192	113
168	ENSG00000118640	490.429	1.53818	0.185244	8.30352	1.01069e-16	9.33687e-15	VAMP8	8673	1.5508e-14	263	212	276	736	563	894
169	ENSG00000183688	171.991	-1.82954	0.220345	-8.30304	1.01481e-16	9.33687e-15	FAM101B	359845	1.5508e-14	245	308	250	84	67	78
170	ENSG00000101224	1351.09	-1.2555	0.151427	-8.29111	1.12199e-16	1.02622e-14	CDC25B	994	1.7045e-14	2053	2032	1632	916	791	682
171	ENSG00000093009	123.643	-2.154	0.259875	-8.28862	1.14574e-16	1.04182e-14	CDC45	8318	1.7304e-14	195	242	170	44	48	43
172	ENSG00000224877	549.294	1.4028	0.169842	8.25942	1.46379e-16	1.32328e-14	C17orf89	284184	2.1979e-14	298	324	279	870	621	904
173	ENSG00000197956	17754	1.41204	0.171102	8.25265	1.54927e-16	1.39246e-14	S100A6	6277	2.3128e-14	9283	8631	11178	29077	18636	29720
174	ENSG00000035862	546.853	1.26212	0.153304	8.23276	1.82941e-16	1.6348e-14	TIMP2	7077	2.71531e-14	335	332	300	665	866	783
175	ENSG00000095539	459.059	1.31644	0.160039	8.22579	1.93901e-16	1.72284e-14	SEMA4G	57715	2.86153e-14	300	223	265	684	616	667
176	ENSG00000135069	1295.55	-1.37209	0.167141	-8.20916	2.22749e-16	1.96791e-14	PSAT1	29968	3.26858e-14	1518	1992	2106	673	864	620
177	ENSG00000169926	709.194	-1.17123	0.142698	-8.20775	2.2537e-16	1.97982e-14	KLF13	51621	3.28837e-14	1077	960	908	420	432	458
178	ENSG00000168306	120.78	-2.03902	0.248619	-8.2014	2.37599e-16	2.07552e-14	ACOX2	8309	3.44733e-14	202	180	201	58	44	40
179	ENSG00000170477	543.299	1.76578	0.215645	8.18835	2.64826e-16	2.30044e-14	KRT4	3851	3.82089e-14	216	205	319	588	849	1083
180	ENSG00000009954	874.026	-1.07158	0.130934	-8.18412	2.74308e-16	2.36957e-14	BAZ1B	9031	3.93572e-14	1203	1200	1152	593	560	536
181	ENSG00000090581	165.969	1.88494	0.230949	8.16171	3.30322e-16	2.83767e-14	GNPTG	84572	4.71321e-14	57	73	80	269	197	320
182	ENSG00000213626	222.426	2.05412	0.251788	8.15815	3.402e-16	2.90647e-14	LBH	81606	4.82747e-14	58	115	85	246	411	418
183	ENSG00000115163	85.259	-2.58435	0.316883	-8.15553	3.47647e-16	2.95386e-14	CENPA	1058	4.90619e-14	138	169	136	21	32	15
184	ENSG00000253368	965.821	1.04738	0.128546	8.14788	3.70349e-16	3.11388e-14	TRNP1	388610	5.17197e-14	592	637	661	1238	1337	1330
185	ENSG00000078804	309.696	1.53739	0.188687	8.14784	3.70485e-16	3.11388e-14	TP53INP2	58476	5.17197e-14	159	122	196	450	483	448
186	ENSG00000133321	63.6258	2.5586	0.314281	8.14112	3.91637e-16	3.27396e-14	RARRES3	5920	5.43786e-14	19	14	22	85	110	131
187	ENSG00000187185	99.637	1.98694	0.244121	8.13919	3.97935e-16	3.30882e-14	CTD-2600O9.1	NA	5.49576e-14	34	45	42	148	153	176
188	ENSG00000143815	296.109	-1.58793	0.195243	-8.13309	4.18484e-16	3.46118e-14	LBR	3930	5.74882e-14	459	493	388	133	180	123
189	ENSG00000138207	174.126	1.73063	0.212937	8.12741	4.3857e-16	3.60811e-14	RBP4	5950	5.99286e-14	88	67	88	317	268	217
190	ENSG00000136938	1061.46	-1.06691	0.131319	-8.12459	4.48892e-16	3.67359e-14	ANP32B	10541	6.10162e-14	1358	1412	1538	706	650	705
191	ENSG00000160200	199.144	-1.925	0.236965	-8.12357	4.52674e-16	3.68515e-14	CBS	102724560	6.12082e-14	236	307	400	85	75	91
192	ENSG00000164825	245.504	1.62448	0.200325	8.10925	5.09321e-16	4.1247e-14	DEFB1	1672	6.8509e-14	89	137	134	363	342	408
193	ENSG00000095383	650.415	1.13819	0.140673	8.09105	5.91502e-16	4.76543e-14	TBC1D2	55357	7.9151e-14	418	402	395	900	807	980
194	ENSG00000130227	487.977	-1.20881	0.150034	-8.05686	7.82791e-16	6.27403e-14	XPO7	23039	1.04208e-13	700	668	681	298	316	264
195	ENSG00000251095	30.5671	3.96615	0.492352	8.05551	7.91478e-16	6.31112e-14	RP11-115D19.1	NA	1.04824e-13	5	3	4	61	61	50
196	ENSG00000104522	676.46	1.1333	0.14088	8.04445	8.66365e-16	6.87301e-14	TSTA3	7264	1.14157e-13	417	429	423	1001	822	967
197	ENSG00000113810	433.625	-1.68274	0.209345	-8.03813	9.12179e-16	7.19973e-14	SMC4	10051	1.19583e-13	711	665	620	171	288	146
198	ENSG00000141741	511.29	1.40283	0.174839	8.02351	1.02767e-15	8.07031e-14	MIEN1	84299	1.34043e-13	275	250	314	828	580	821
199	ENSG00000087088	948.631	1.1844	0.147739	8.01687	1.08471e-15	8.47543e-14	BAX	581	1.40772e-13	497	640	600	1258	1219	1478
200	ENSG00000100889	512.82	-1.39374	0.173899	-8.01464	1.10462e-15	8.58784e-14	PCK2	5106	1.42639e-13	590	778	861	293	282	272
201	ENSG00000274276	188.025	-1.89703	0.237133	-7.99986	1.24558e-15	9.6356e-14	CBSL	102724560	1.60042e-13	227	287	373	84	72	86
202	ENSG00000109814	1676.99	-0.984293	0.123468	-7.97202	1.56103e-15	1.2016e-13	UGDH	7358	1.9958e-13	2214	2344	2128	1062	1185	1128
203	ENSG00000143401	319.797	-1.37056	0.172386	-7.9505	1.85761e-15	1.42286e-13	ANP32E	81611	2.36328e-13	448	453	479	157	171	212
204	ENSG00000168078	232.132	-2.04259	0.257017	-7.94728	1.90646e-15	1.45311e-13	PBK	55872	2.41354e-13	421	396	315	70	136	55
205	ENSG00000124795	369.934	-1.6329	0.205828	-7.93331	2.13378e-15	1.61845e-13	DEK	7913	2.68815e-13	612	586	491	169	237	123
206	ENSG00000091436	329.469	-1.36362	0.172188	-7.91934	2.38768e-15	1.80224e-13	AC013461.1	51776	2.99341e-13	503	448	480	185	206	156
207	ENSG00000274012	562.179	1.43854	0.181783	7.91351	2.50238e-15	1.87969e-13	RN7SL2	378706	3.12205e-13	243	358	307	992	702	771
208	ENSG00000264644	236.415	1.47698	0.186974	7.89936	2.80343e-15	2.0957e-13	KRT18P8	NA	3.48083e-13	109	150	116	326	362	355
209	ENSG00000197903	241.491	1.33053	0.170109	7.82163	5.21456e-15	3.87948e-13	HIST1H2BK	85236	6.44359e-13	133	141	138	365	340	332
210	ENSG00000136527	655.091	-1.132	0.145099	-7.80157	6.11405e-15	4.52702e-13	TRA2B	6434	7.51912e-13	992	832	875	431	405	395
211	ENSG00000148926	185.121	1.61151	0.206633	7.79891	6.2446e-15	4.60176e-13	ADM	133	7.64327e-13	92	88	96	234	344	257
212	ENSG00000148677	34.9359	3.65623	0.468967	7.79635	6.37257e-15	4.67392e-13	ANKRD1	27063	7.76311e-13	6	6	4	37	77	81
213	ENSG00000241935	56.2193	2.64218	0.33962	7.77983	7.26215e-15	5.30137e-13	HOGA1	112817	8.80527e-13	12	13	22	80	92	118
214	ENSG00000226532	145.977	1.97964	0.254522	7.77784	7.37724e-15	5.36022e-13	RP5-1052M9.1	NA	8.90302e-13	52	69	54	225	161	315
215	ENSG00000136003	469.727	1.22086	0.157008	7.77578	7.4984e-15	5.42291e-13	ISCU	23479	9.00714e-13	249	291	305	724	592	657
216	ENSG00000146670	228.046	-1.779	0.228818	-7.77477	7.55875e-15	5.44125e-13	CDCA5	113130	9.03761e-13	361	429	270	131	92	86
217	ENSG00000164237	341.663	1.24377	0.16013	7.76724	8.02131e-15	5.74762e-13	CMBL	134147	9.54647e-13	196	188	223	453	475	514
218	ENSG00000172667	95.5816	2.09561	0.269925	7.7637	8.24897e-15	5.88363e-13	ZMAT3	64393	9.77238e-13	35	40	36	122	205	136
219	ENSG00000122966	149.508	-1.97891	0.255328	-7.75047	9.15506e-15	6.49118e-13	CIT	100302274	1.07815e-12	224	302	193	70	65	43
220	ENSG00000198830	1171.86	-1.08116	0.139503	-7.75007	9.18425e-15	6.49118e-13	HMGN2	3151	1.07815e-12	1553	1789	1430	806	717	735
221	ENSG00000163191	7007.62	1.12629	0.1457	7.73022	1.07357e-14	7.55337e-13	S100A11	6282	1.25457e-12	4186	3977	5041	9806	8072	10963
222	ENSG00000121152	154.223	-1.85391	0.240824	-7.6982	1.38e-14	9.61834e-13	NCAPH	23397	1.59755e-12	249	283	195	78	69	50
223	ENSG00000141027	722.591	-1.036	0.134585	-7.69775	1.38481e-14	9.61834e-13	NCOR1	9611	1.59755e-12	946	995	976	483	485	451
224	ENSG00000169607	81.3665	-2.38976	0.310452	-7.69768	1.38563e-14	9.61834e-13	CKAP2L	150468	1.59755e-12	149	142	122	19	33	23
225	ENSG00000168453	206.011	-1.73352	0.225342	-7.69287	1.43873e-14	9.94259e-13	HR	55806	1.65141e-12	327	284	332	120	66	106
226	ENSG00000213977	140.704	1.62535	0.211454	7.68653	1.51183e-14	1.04015e-12	TAX1BP3	30851	1.72763e-12	72	65	68	209	188	242
227	ENSG00000105372	23574.5	1.27446	0.165855	7.68418	1.5398e-14	1.05473e-12	RPS19	6223	1.75184e-12	12589	13862	14913	35987	24181	39915
228	ENSG00000092470	91.3521	-2.3958	0.311856	-7.68239	1.56153e-14	1.06493e-12	WDR76	79968	1.76878e-12	170	180	113	31	33	20
229	ENSG00000100033	195.574	1.79553	0.234873	7.64469	2.09457e-14	1.42221e-12	PRODH	102724788	2.3622e-12	122	67	72	298	267	348
230	ENSG00000070526	479.617	1.17681	0.154137	7.63482	2.26142e-14	1.52882e-12	ST6GALNAC1	55808	2.53928e-12	328	285	272	631	735	627
231	ENSG00000164032	1296.43	-1.02998	0.135145	-7.62131	2.51121e-14	1.69034e-12	H2AFZ	3015	2.80755e-12	1779	1848	1599	917	879	756
232	ENSG00000132470	2212.94	1.02458	0.134502	7.61756	2.58514e-14	1.7326e-12	ITGB4	3691	2.87775e-12	1548	1383	1443	2546	3048	3309
233	ENSG00000214900	85.185	2.03634	0.267589	7.60999	2.74124e-14	1.82934e-12	LINC01588	283551	3.03842e-12	39	27	33	136	117	159
234	ENSG00000075218	153.113	-1.95351	0.256879	-7.60478	2.85387e-14	1.89636e-12	GTSE1	51512	3.14974e-12	255	295	176	66	53	73
235	ENSG00000116299	30.9276	3.62227	0.476713	7.59843	2.99747e-14	1.98331e-12	KIAA1324	57535	3.29416e-12	6	6	2	54	67	50
236	ENSG00000134574	403.093	1.24343	0.163828	7.58985	3.20284e-14	2.11021e-12	DDB2	1643	3.50493e-12	219	255	242	645	490	567
237	ENSG00000115758	1226.16	-1.08852	0.14359	-7.58077	3.43521e-14	2.25376e-12	ODC1	4953	3.74336e-12	1786	1791	1431	816	824	708
238	ENSG00000108439	350.407	1.18227	0.156001	7.5786	3.49303e-14	2.28207e-12	PNPO	55163	3.79038e-12	207	215	219	452	478	531
239	ENSG00000130066	641.669	1.07932	0.142451	7.57679	3.54201e-14	2.30438e-12	SAT1	6303	3.82745e-12	381	402	456	903	897	811
240	ENSG00000174442	176.811	-1.75997	0.232833	-7.55895	4.06346e-14	2.63261e-12	ZWILCH	55055	4.37262e-12	293	309	223	77	99	60
241	ENSG00000024422	1814.34	0.927082	0.122699	7.55575	4.16442e-14	2.68683e-12	EHD2	30846	4.46267e-12	1349	1188	1213	2313	2318	2506
242	ENSG00000239559	168.91	1.71114	0.227355	7.52631	5.2196e-14	3.3537e-12	RPL37P2	NA	5.5703e-12	66	82	87	272	192	315
243	ENSG00000134690	152.59	-1.69717	0.225778	-7.51697	5.60613e-14	3.58723e-12	CDCA8	55143	5.95818e-12	222	271	207	68	73	76
244	ENSG00000138180	324.029	-1.66192	0.221579	-7.50034	6.36549e-14	4.05643e-12	CEP55	55165	6.7375e-12	537	539	412	145	211	101
245	ENSG00000164104	222.978	-1.60379	0.214046	-7.49275	6.74446e-14	4.28039e-12	HMGB2	3148	7.10949e-12	302	350	347	120	81	139
246	ENSG00000116717	130.076	2.05883	0.275388	7.47611	7.6552e-14	4.83865e-12	GADD45A	1647	8.03671e-12	29	51	70	183	197	249
247	ENSG00000163956	908.907	1.13803	0.152406	7.46712	8.19695e-14	5.1601e-12	LRPAP1	4043	8.57062e-12	590	521	588	1172	1084	1498
248	ENSG00000145247	413.29	1.17526	0.157714	7.45182	9.20631e-14	5.77213e-12	OCIAD2	132299	9.58718e-12	223	255	283	598	539	582
249	ENSG00000228462	38.6397	3.87671	0.520631	7.44617	9.6089e-14	6.00035e-12	RP11-445N18.3	NA	9.96624e-12	3	3	8	82	30	106
250	ENSG00000167196	463.217	1.08267	0.145581	7.43692	1.03063e-13	6.41009e-12	FBXO22	26263	1.06468e-11	290	286	317	595	650	642
251	ENSG00000102316	1065.39	1.01607	0.136644	7.43585	1.03894e-13	6.43605e-12	MAGED2	10916	1.06899e-11	719	649	743	1526	1266	1488
252	ENSG00000104738	608.563	-1.37056	0.184377	-7.43346	1.0579e-13	6.5275e-12	MCM4	4173	1.08418e-11	981	1012	643	340	363	312
253	ENSG00000006606	35.7769	3.47944	0.468209	7.43138	1.07473e-13	6.60511e-12	CCL26	10344	1.09707e-11	6	11	1	66	75	55
254	ENSG00000184661	156.579	-1.70498	0.229708	-7.42239	1.15024e-13	7.04134e-12	CDCA2	157313	1.16953e-11	267	245	211	66	89	60
255	ENSG00000158373	176.005	1.57998	0.21305	7.416	1.20711e-13	7.36052e-12	HIST1H2BD	3017	1.22254e-11	90	68	106	276	235	282
256	ENSG00000149503	235.413	-1.80521	0.243561	-7.41175	1.24639e-13	7.57036e-12	INCENP	3619	1.25739e-11	391	469	238	98	110	106
257	ENSG00000100031	1088.29	1.23713	0.166976	7.40905	1.27207e-13	7.69626e-12	GGT1	102724197	1.2783e-11	689	549	702	1502	1232	1856
258	ENSG00000179776	35.6663	3.08465	0.416471	7.40665	1.29529e-13	7.8064e-12	CDH5	1003	1.2966e-11	7	6	9	54	82	55
259	ENSG00000137812	77.0193	-2.44805	0.330686	-7.40293	1.3321e-13	7.99725e-12	KNL1	57082	1.3283e-11	157	132	101	31	21	20
260	ENSG00000068489	230.801	-1.78195	0.240762	-7.40131	1.34844e-13	8.06421e-12	PRR11	55771	1.33942e-11	360	427	294	122	126	55
261	ENSG00000197273	33.9177	3.39573	0.459062	7.39712	1.39171e-13	8.29105e-12	GUCA2A	2980	1.3771e-11	7	4	6	65	41	81
262	ENSG00000178947	78.6422	2.05855	0.278337	7.39591	1.40448e-13	8.3352e-12	SMIM10L2A	NA	1.38443e-11	37	25	28	115	113	154
263	ENSG00000129195	95.6325	-2.1651	0.292802	-7.39444	1.42002e-13	8.39538e-12	FAM64A	54478	1.39442e-11	153	192	123	40	32	33
264	ENSG00000136114	82.8866	1.98629	0.269032	7.3831	1.54642e-13	9.10806e-12	THSD1	55901	1.5128e-11	30	41	28	122	125	151
265	ENSG00000148344	617.718	1.09366	0.148529	7.36327	1.79454e-13	1.05295e-11	PTGES	9536	1.74889e-11	352	434	395	785	809	932
266	ENSG00000115204	452.764	1.12334	0.152584	7.36209	1.81048e-13	1.05831e-11	MPV17	4358	1.7578e-11	278	258	320	630	641	589
267	ENSG00000164405	1931.29	1.25947	0.171099	7.36107	1.82435e-13	1.06243e-11	UQCRQ	27089	1.76463e-11	1070	1043	1298	3286	2028	2863
268	ENSG00000161970	2473.21	1.52174	0.207232	7.34317	2.08598e-13	1.21026e-11	RPL26	6154	2.01017e-11	1155	1162	1511	3900	2295	4815
269	ENSG00000100196	418.109	1.17516	0.160096	7.34033	2.13072e-13	1.23142e-11	KDELR3	11015	2.04533e-11	266	225	282	583	630	524
270	ENSG00000135476	111.3	-1.96034	0.267081	-7.33985	2.1383e-13	1.23142e-11	ESPL1	9700	2.04533e-11	184	199	146	56	38	45
271	ENSG00000012048	149.334	-1.9998	0.27248	-7.33926	2.14777e-13	1.23231e-11	BRCA1	672	2.0468e-11	258	264	203	51	87	33
272	ENSG00000179023	85.7341	2.14035	0.291675	7.33816	2.16558e-13	1.23796e-11	KLHDC7A	127707	2.05618e-11	39	26	28	103	126	191
273	ENSG00000254166	125.006	1.78745	0.244062	7.32374	2.41156e-13	1.37353e-11	CASC19	NA	2.28136e-11	56	51	64	164	252	164
274	ENSG00000171298	532.289	1.061	0.144882	7.32318	2.42155e-13	1.37419e-11	GAA	2548	2.28244e-11	362	330	340	710	664	788
275	ENSG00000170271	71.4516	2.41166	0.329452	7.32022	2.4757e-13	1.39981e-11	FAXDC2	10826	2.325e-11	25	13	29	119	90	154
276	ENSG00000143476	199.214	-1.75196	0.239761	-7.30712	2.7293e-13	1.5376e-11	DTL	51514	2.55387e-11	303	368	258	75	123	68
277	ENSG00000064205	103.118	2.18269	0.299287	7.29297	3.03206e-13	1.70201e-11	WISP2	8839	2.82694e-11	56	33	22	199	138	171
278	ENSG00000099337	155.541	1.71206	0.234897	7.28858	3.1324e-13	1.752e-11	KCNK6	9424	2.90998e-11	88	62	66	195	210	312
279	ENSG00000132967	342.254	-1.35577	0.186106	-7.28496	3.21759e-13	1.7932e-11	HMGB1P5	NA	2.97841e-11	492	555	425	220	159	204
280	ENSG00000123933	199.715	1.34825	0.185242	7.27833	3.37973e-13	1.87684e-11	MXD4	100616358	3.11732e-11	116	109	111	270	267	325
281	ENSG00000069275	1838.04	-0.859266	0.118216	-7.2686	3.63237e-13	2.00995e-11	NUCKS1	64710	3.33842e-11	2335	2317	2456	1338	1266	1317
282	ENSG00000144063	2846.09	0.83458	0.115004	7.25696	3.95886e-13	2.18285e-11	MALL	7851	3.62558e-11	2097	1951	2084	3621	3517	3805
283	ENSG00000115641	473.239	1.08771	0.149903	7.25613	3.98333e-13	2.18858e-11	FHL2	2274	3.6351e-11	287	323	301	616	710	602
284	ENSG00000185561	135.174	1.53272	0.211402	7.25025	4.16005e-13	2.27763e-11	TLCD2	727910	3.78301e-11	69	62	78	197	202	204
285	ENSG00000111057	68036.1	0.942927	0.130119	7.24664	4.27226e-13	2.33086e-11	KRT18	3875	3.87142e-11	48625	47574	43479	91101	76769	100669
286	ENSG00000181634	26.0349	3.78773	0.523125	7.24058	4.46769e-13	2.42896e-11	TNFSF15	9966	4.03436e-11	5	2	4	56	42	48
287	ENSG00000112081	1091.28	-0.930139	0.128471	-7.24005	4.48525e-13	2.43001e-11	SRSF3	6428	4.0361e-11	1455	1475	1369	762	787	700
288	ENSG00000147394	440.319	1.13885	0.157369	7.23679	4.59438e-13	2.48049e-11	ZNF185	7739	4.11995e-11	306	286	233	593	607	617
289	ENSG00000237649	132.842	-1.8165	0.251206	-7.23112	4.79038e-13	2.57736e-11	KIFC1	3833	4.28084e-11	207	250	163	56	58	63
290	ENSG00000196208	37.2235	2.80137	0.387475	7.2298	4.83716e-13	2.59355e-11	GREB1	9687	4.30774e-11	8	10	10	73	59	63
291	ENSG00000147592	240.142	1.28791	0.178278	7.22416	5.04221e-13	2.69421e-11	LACTB2	51110	4.47492e-11	125	133	160	349	333	340
292	ENSG00000182795	456.925	1.13833	0.157708	7.21795	5.27755e-13	2.81029e-11	C1orf116	79098	4.66774e-11	325	279	252	581	669	635
293	ENSG00000181143	182.009	1.70412	0.236196	7.21486	5.39896e-13	2.86514e-11	MUC16	94025	4.75883e-11	96	58	101	291	221	325
294	ENSG00000166889	369.537	-1.18333	0.164161	-7.20835	5.66358e-13	2.99534e-11	PATL1	219988	4.97509e-11	521	505	519	246	240	186
295	ENSG00000165757	34.8889	3.04736	0.424466	7.17927	7.00842e-13	3.69403e-11	KIAA1462	57608	6.13557e-11	7	9	7	45	81	60
296	ENSG00000163584	510.704	1.07721	0.150526	7.15628	8.28929e-13	4.3544e-11	RPL22L1	200916	7.23241e-11	292	327	365	727	652	700
297	ENSG00000136378	39.229	2.85071	0.398837	7.14755	8.83405e-13	4.61051e-11	ADAMTS7	11173	7.65779e-11	9	12	8	47	72	88
298	ENSG00000072571	158.518	-1.56161	0.218483	-7.14752	8.83614e-13	4.61051e-11	HMMR	3161	7.65779e-11	235	228	252	84	91	60
299	ENSG00000130005	232.675	1.46	0.204424	7.14201	9.19747e-13	4.78299e-11	GAMT	2593	7.94428e-11	135	132	101	338	273	416
300	ENSG00000188191	259.146	1.22594	0.171702	7.13994	9.33737e-13	4.83956e-11	PRKAR1B	5575	8.03823e-11	154	168	143	391	337	363
301	ENSG00000164535	184.935	1.31796	0.1847	7.1357	9.62967e-13	4.97448e-11	DAGLB	221955	8.26232e-11	102	105	109	255	261	277
302	ENSG00000092841	4920.4	0.915379	0.128587	7.11872	1.0893e-12	5.60847e-11	MYL6	4637	9.31534e-11	3529	3556	3140	6902	5614	6782
303	ENSG00000187994	58.6126	2.35574	0.330967	7.11776	1.09693e-12	5.62908e-11	RINL	126432	9.34958e-11	18	12	28	101	92	101
304	ENSG00000136295	646.472	1.16355	0.163492	7.11687	1.10403e-12	5.64512e-11	TTYH3	80727	9.37622e-11	374	458	364	748	888	1048
305	ENSG00000107738	327.827	1.27108	0.178611	7.11646	1.10731e-12	5.64512e-11	C10orf54	64115	9.37622e-11	191	228	157	420	482	489
306	ENSG00000125968	1597.74	-1.24349	0.174816	-7.11315	1.1342e-12	5.7633e-11	ID1	3397	9.57251e-11	2122	2180	2430	1191	686	977
307	ENSG00000136149	252.914	1.62936	0.229504	7.09947	1.25233e-12	6.34281e-11	RPL13AP25	NA	1.05351e-10	112	129	126	426	241	484
308	ENSG00000108106	1431.76	-1.11292	0.156808	-7.09736	1.27164e-12	6.41973e-11	UBE2S	27338	1.06628e-10	1951	2342	1583	965	908	841
309	ENSG00000005156	199.907	-1.38312	0.194925	-7.09567	1.28724e-12	6.45943e-11	LIG3	3980	1.07287e-10	298	304	268	106	120	103
310	ENSG00000175938	58.6283	2.3466	0.330711	7.09561	1.28781e-12	6.45943e-11	ORAI3	93129	1.07287e-10	21	13	24	96	78	121
311	ENSG00000117448	873.554	1.0879	0.153394	7.09216	1.32031e-12	6.60112e-11	AKR1A1	10327	1.09641e-10	582	567	523	1353	966	1249
312	ENSG00000120725	333.823	1.1864	0.167322	7.09048	1.33647e-12	6.66051e-11	SIL1	64374	1.10627e-10	207	185	217	459	409	526
313	ENSG00000197448	1310.68	1.12304	0.158711	7.076	1.48373e-12	7.37075e-11	GSTK1	373156	1.22424e-10	884	724	863	2076	1429	1889
314	ENSG00000137310	110.27	-2.07825	0.293723	-7.07553	1.48884e-12	7.37258e-11	TCF19	6941	1.22454e-10	199	217	123	47	47	30
315	ENSG00000029534	38.3826	2.67067	0.37757	7.07331	1.51283e-12	7.46764e-11	ANK1	286	1.24033e-10	13	10	9	63	71	65
316	ENSG00000197299	91.6078	-2.03235	0.287554	-7.06773	1.57493e-12	7.74954e-11	BLM	641	1.28715e-10	145	161	141	37	46	20
317	ENSG00000162607	138.72	-1.89253	0.267916	-7.06388	1.61922e-12	7.94236e-11	USP1	7398	1.31918e-10	235	225	203	37	85	48
318	ENSG00000073417	352.734	-1.19655	0.169492	-7.05958	1.67005e-12	8.16589e-11	PDE8A	5151	1.35631e-10	500	498	483	209	247	179
319	ENSG00000183856	188.666	-1.71877	0.244055	-7.04254	1.88762e-12	9.20083e-11	IQGAP3	128239	1.5282e-10	325	320	231	68	118	71
320	ENSG00000137337	186.211	-1.52774	0.21709	-7.03738	1.95881e-12	9.51799e-11	MDC1	9656	1.58088e-10	303	289	233	110	79	103
321	ENSG00000240463	95.4948	2.29212	0.326165	7.02748	2.10292e-12	1.01864e-10	RPS19P3	NA	1.6919e-10	20	39	37	188	90	199
322	ENSG00000185567	2013.31	0.98232	0.139884	7.02237	2.18129e-12	1.05332e-10	AHNAK2	113146	1.7495e-10	1437	1314	1307	2217	2840	2964
323	ENSG00000118785	3105.42	0.937358	0.133625	7.01484	2.30216e-12	1.10824e-10	SPP1	6696	1.84073e-10	2101	1905	2382	4268	3652	4324
324	ENSG00000145592	9297.84	1.09362	0.156074	7.00708	2.4334e-12	1.16778e-10	RPL37	6167	1.93962e-10	5402	5648	6745	13435	9880	14677
325	ENSG00000169359	92.227	1.75335	0.250241	7.00665	2.44085e-12	1.16778e-10	SLC33A1	9197	1.93962e-10	47	35	44	152	127	149
326	ENSG00000108861	620.672	1.04736	0.149494	7.006	2.45232e-12	1.16966e-10	DUSP3	1845	1.94275e-10	407	427	384	743	958	806
327	ENSG00000164611	490.248	-1.1436	0.163253	-7.00507	2.46867e-12	1.17386e-10	PTTG1	9232	1.94972e-10	668	707	642	338	251	335
328	ENSG00000090861	2930.13	-1.02526	0.146452	-7.00067	2.54743e-12	1.20762e-10	AARS	16	2.00579e-10	3520	3659	4602	1906	1710	2183
329	ENSG00000105281	2351.77	-0.975681	0.139714	-6.9834	2.88117e-12	1.36168e-10	SLC1A5	6510	2.26168e-10	2849	2900	3600	1674	1425	1662
330	ENSG00000166289	46.5938	2.39726	0.343406	6.98083	2.93433e-12	1.3826e-10	PLEKHF1	79156	2.29642e-10	15	17	12	91	69	76
331	ENSG00000116711	679.054	-1.15531	0.165559	-6.97823	2.98929e-12	1.40424e-10	PLA2G4A	5321	2.33237e-10	960	829	1030	485	443	327
332	ENSG00000111348	40.1862	2.74058	0.392906	6.97514	3.05563e-12	1.43109e-10	ARHGDIB	397	2.37695e-10	9	7	16	61	68	81
333	ENSG00000155561	499.852	-1.25208	0.179647	-6.96966	3.17702e-12	1.48347e-10	NUP205	23165	2.46395e-10	763	782	574	307	336	237
334	ENSG00000183684	413.977	-1.12372	0.161466	-6.95943	3.41641e-12	1.59047e-10	ALYREF	10189	2.64168e-10	531	640	531	272	251	259
335	ENSG00000092201	1146.99	-0.962336	0.138329	-6.95685	3.47954e-12	1.61502e-10	SUPT16H	11198	2.68246e-10	1619	1620	1310	785	783	766
336	ENSG00000198734	541.517	1.20771	0.173642	6.95515	3.52197e-12	1.62985e-10	F5	2153	2.70709e-10	384	246	350	766	722	781
337	ENSG00000079112	388.528	1.47033	0.211571	6.94959	3.66337e-12	1.69026e-10	CDH17	1015	2.80743e-10	262	141	218	555	673	484
338	ENSG00000167996	4169.89	-1.02309	0.14731	-6.94512	3.78144e-12	1.73957e-10	FTH1	2495	2.88933e-10	5623	6513	4632	3077	2559	2617
339	ENSG00000168350	178.914	1.7596	0.253515	6.94083	3.89813e-12	1.78796e-10	DEGS2	123099	2.96971e-10	112	56	76	358	237	234
340	ENSG00000235142	86.0915	1.86086	0.268161	6.93935	3.93913e-12	1.80146e-10	RP1-60O19.1	100422737	2.99212e-10	37	31	43	150	108	149
341	ENSG00000186193	77.1391	-2.49622	0.360007	-6.93383	4.09597e-12	1.86769e-10	SAPCD2	89958	3.10213e-10	151	162	80	31	21	18
342	ENSG00000100299	190.744	1.29567	0.18693	6.93134	4.16876e-12	1.89532e-10	ARSA	410	3.14802e-10	114	116	100	258	262	295
343	ENSG00000089280	1448.88	-0.891521	0.128753	-6.92428	4.38204e-12	1.98387e-10	FUS	2521	3.29509e-10	1842	1906	1894	1088	908	1055
344	ENSG00000125885	205.834	-1.48732	0.214812	-6.92384	4.39564e-12	1.98387e-10	MCM8	84515	3.29509e-10	325	324	268	89	136	93
345	ENSG00000198258	985.149	1.18157	0.170658	6.92364	4.40179e-12	1.98387e-10	UBL5	59286	3.29509e-10	546	579	679	1446	1039	1622
346	ENSG00000114779	431.461	1.03324	0.149692	6.90241	5.11274e-12	2.29763e-10	ABHD14B	84836	3.81623e-10	287	289	274	638	545	557
347	ENSG00000064787	273.13	1.25917	0.182462	6.90098	5.16443e-12	2.31417e-10	BCAS1	8537	3.84371e-10	177	127	179	392	388	375
348	ENSG00000150782	759.858	1.13942	0.165287	6.89355	5.44157e-12	2.43135e-10	IL18	3606	4.03833e-10	488	454	486	860	1304	967
349	ENSG00000099783	1247.39	-0.881062	0.127854	-6.89116	5.53394e-12	2.46554e-10	HNRNPM	4670	4.09512e-10	1667	1638	1540	876	820	944
350	ENSG00000135404	3871.6	1.11234	0.161526	6.88648	5.71884e-12	2.54064e-10	CD63	967	4.21985e-10	2557	2056	2728	5280	4242	6367
351	ENSG00000185630	748.656	-0.978422	0.142123	-6.88435	5.80514e-12	2.57163e-10	PBX1	5087	4.27132e-10	1035	1030	920	490	553	463
352	ENSG00000103415	543.311	1.01022	0.146851	6.87925	6.01672e-12	2.65778e-10	HMOX2	3163	4.41443e-10	381	348	348	752	647	783
353	ENSG00000263934	43.9152	3.26491	0.475027	6.87311	6.28183e-12	2.76703e-10	SNORD3A	780851	4.59588e-10	6	9	9	108	28	103
354	ENSG00000153822	217.964	1.29186	0.187974	6.87256	6.30583e-12	2.76976e-10	KCNJ16	3773	4.60041e-10	138	104	138	297	317	315
355	ENSG00000276023	184.705	1.44165	0.210643	6.84404	7.69925e-12	3.37227e-10	DUSP14	11072	5.60115e-10	76	123	99	267	259	285
356	ENSG00000171241	246.766	-1.71092	0.250043	-6.84247	7.78365e-12	3.39966e-10	SHCBP1	79801	5.64665e-10	435	412	296	89	168	81
357	ENSG00000111775	1655.18	1.15109	0.168266	6.84093	7.86814e-12	3.42694e-10	COX6A1	1337	5.69195e-10	933	904	1243	2599	1812	2440
358	ENSG00000140519	62.5003	2.12974	0.311381	6.83968	7.93686e-12	3.44721e-10	RHCG	51458	5.72562e-10	22	24	23	120	73	113
359	ENSG00000157379	116.171	1.56576	0.229014	6.83697	8.0885e-12	3.50329e-10	DHRS1	115817	5.81876e-10	52	58	65	174	151	196
360	ENSG00000101412	210.815	-1.58966	0.232541	-6.83605	8.14073e-12	3.51612e-10	E2F1	1869	5.84007e-10	325	398	228	92	114	108
361	ENSG00000129422	3011.75	-1.05914	0.154983	-6.83393	8.26203e-12	3.55862e-10	MTUS1	57509	5.91067e-10	4345	3625	4253	1946	2345	1556
362	ENSG00000167900	639.801	-1.25363	0.18353	-6.83064	8.45381e-12	3.63117e-10	TK1	7083	6.03117e-10	884	1137	686	368	401	363
363	ENSG00000113739	139.011	-2.31186	0.338544	-6.82885	8.56005e-12	3.66667e-10	STC2	8614	6.09013e-10	120	207	368	40	51	48
364	ENSG00000182326	178.543	1.46396	0.21449	6.82528	8.7751e-12	3.74436e-10	C1S	716	6.21917e-10	98	112	73	272	224	292
365	ENSG00000227081	241.327	1.87095	0.274131	6.82505	8.78958e-12	3.74436e-10	RP11-543P15.1	NA	6.21917e-10	80	122	106	462	196	481
366	ENSG00000131378	61.9138	1.99667	0.293247	6.80883	9.8398e-12	4.1803e-10	RFTN1	23180	6.94324e-10	29	24	21	108	96	93
367	ENSG00000183337	339.762	-1.17802	0.173068	-6.80669	9.9869e-12	4.23123e-10	BCOR	54880	7.02784e-10	528	479	408	197	218	209
368	ENSG00000179222	1460.57	0.918163	0.134986	6.8019	1.03248e-11	4.3625e-10	MAGED1	9500	7.24586e-10	1086	903	1041	2055	1725	1954
369	ENSG00000111371	997.853	-1.20695	0.177563	-6.79731	1.06589e-11	4.49145e-10	SLC38A1	81539	7.46004e-10	1413	1350	1428	600	771	426
370	ENSG00000169045	641.022	-1.22094	0.179714	-6.79378	1.09232e-11	4.5904e-10	HNRNPH1	3187	7.62439e-10	883	1093	722	354	447	348
371	ENSG00000239672	1486.41	1.16428	0.171464	6.79024	1.11944e-11	4.69171e-10	NME1	4830	7.79265e-10	831	950	965	2140	1511	2521
372	ENSG00000138326	13492.5	1.09488	0.161261	6.7895	1.12524e-11	4.70334e-10	RPS24	6229	7.81197e-10	7977	7300	10535	19951	14992	20200
373	ENSG00000090266	637.388	1.19711	0.176459	6.78405	1.16852e-11	4.87111e-10	NDUFB2	4708	8.09064e-10	406	355	396	1069	663	934
374	ENSG00000153071	591.546	1.05358	0.155348	6.78203	1.18496e-11	4.92644e-10	DAB2	1601	8.18253e-10	421	350	386	753	923	715
375	ENSG00000005884	2092.55	0.998245	0.147215	6.78088	1.19448e-11	4.95278e-10	ITGA3	3675	8.22628e-10	1480	1483	1224	2327	2859	3183
376	ENSG00000258498	56.8697	2.03251	0.29977	6.78023	1.19982e-11	4.9617e-10	DIO3OS	100302145	8.24111e-10	22	23	23	98	86	91
377	ENSG00000178038	62.115	1.9617	0.289358	6.77949	1.20603e-11	4.97417e-10	ALS2CL	259173	8.26181e-10	26	25	25	87	101	108
378	ENSG00000124067	374.46	1.19076	0.175662	6.77873	1.21237e-11	4.98706e-10	SLC12A4	6560	8.28322e-10	265	236	182	474	525	564
379	ENSG00000168393	282.341	-1.34571	0.198743	-6.7711	1.27803e-11	5.24328e-10	DTYMK	1841	8.7088e-10	404	492	320	160	161	156
380	ENSG00000123384	197.51	1.36007	0.201129	6.76219	1.35924e-11	5.56181e-10	LRP1	4035	9.23785e-10	110	100	120	253	250	353
381	ENSG00000069399	719.041	-1.20139	0.177734	-6.75951	1.38456e-11	5.65052e-10	BCL3	102465879	9.38519e-10	916	896	1191	534	355	423
382	ENSG00000156970	146.74	-1.66767	0.246991	-6.75194	1.45882e-11	5.93801e-10	BUB1B	701	9.86269e-10	259	245	169	70	80	58
383	ENSG00000065328	144.16	-1.90439	0.282252	-6.74714	1.50791e-11	6.1218e-10	MCM10	55388	1.0168e-09	236	304	144	65	65	50
384	ENSG00000153885	462.069	-1.03156	0.152936	-6.74505	1.52973e-11	6.1942e-10	KCTD15	79047	1.02882e-09	576	672	616	291	320	297
385	ENSG00000109805	126.472	-1.75831	0.260703	-6.7445	1.53559e-11	6.2018e-10	NCAPG	64151	1.03008e-09	223	203	166	65	70	33
386	ENSG00000141499	230.328	-1.27564	0.189152	-6.74397	1.54117e-11	6.20819e-10	WRAP53	55135	1.03114e-09	338	352	286	129	131	146
387	ENSG00000236439	162.899	1.86383	0.276655	6.73702	1.61667e-11	6.48529e-10	RP11-175B9.3	NA	1.07717e-09	48	94	67	314	162	292
388	ENSG00000197771	341.524	-1.21241	0.179967	-6.73687	1.6183e-11	6.48529e-10	MCMBP	79892	1.07717e-09	473	523	444	199	245	166
389	ENSG00000131051	592.153	-0.974318	0.144742	-6.73142	1.6802e-11	6.71604e-10	RBM39	9584	1.1155e-09	840	771	746	370	424	403
390	ENSG00000162244	6740.35	0.986725	0.146605	6.73049	1.69097e-11	6.74178e-10	RPL29	6159	1.11977e-09	4080	4498	4980	9650	7228	10006
391	ENSG00000188985	144.802	-1.70119	0.253021	-6.72351	1.77404e-11	7.05487e-10	DHFRP1	NA	1.17177e-09	227	252	193	73	86	38
392	ENSG00000116062	418.196	-1.29053	0.191955	-6.72307	1.77929e-11	7.0577e-10	MSH6	2956	1.17224e-09	603	723	459	253	264	207
393	ENSG00000171552	1430.79	0.833095	0.124112	6.71243	1.91413e-11	7.57324e-10	BCL2L1	598	1.25787e-09	1046	1086	953	1892	1761	1846
394	ENSG00000117593	472.229	-1.22755	0.182966	-6.70919	1.95714e-11	7.72375e-10	DARS2	55157	1.28287e-09	678	734	582	328	311	201
395	ENSG00000144554	118.774	-1.79062	0.267271	-6.69963	2.08954e-11	8.22537e-10	FANCD2	2177	1.36619e-09	187	219	152	42	68	45
396	ENSG00000100139	376.592	1.21669	0.181951	6.68692	2.27917e-11	8.94921e-10	MICALL1	85377	1.48641e-09	249	255	174	471	519	592
397	ENSG00000102974	412.214	-1.06743	0.159687	-6.68453	2.3167e-11	9.06913e-10	CTCF	10664	1.50633e-09	603	560	513	291	264	242
398	ENSG00000100121	157.069	1.71493	0.256563	6.68423	2.32138e-11	9.06913e-10	GGTLC2	91227	1.50633e-09	65	63	90	204	178	343
399	ENSG00000105825	2120.38	1.2794	0.191446	6.68281	2.344e-11	9.13457e-10	TFPI2	7980	1.5172e-09	1160	1689	864	3064	3202	2743
400	ENSG00000139278	207.403	1.65953	0.248493	6.67836	2.41628e-11	9.39267e-10	GLIPR1	11010	1.56007e-09	101	122	79	248	448	247
401	ENSG00000260912	24.5229	3.37294	0.505489	6.67262	2.5127e-11	9.74312e-10	RP11-363E7.4	NA	1.61828e-09	3	6	4	45	48	40
402	ENSG00000142676	5170.58	0.947651	0.14203	6.6722	2.51989e-11	9.74673e-10	RPL11	6135	1.61888e-09	3343	3593	3651	7041	5533	7863
403	ENSG00000108691	106.149	2.15185	0.323069	6.66066	2.72607e-11	1.0518e-09	CCL2	6347	1.74699e-09	23	65	30	129	202	189
404	ENSG00000244398	1975.32	1.14618	0.172125	6.65901	2.75684e-11	1.06104e-09	RP11-466H18.1	NA	1.76233e-09	1094	1171	1418	2911	2021	3236
405	ENSG00000145632	520.247	1.23382	0.185413	6.65442	2.84416e-11	1.09195e-09	PLK2	10769	1.81366e-09	248	374	310	583	833	773
406	ENSG00000008517	310.85	1.54912	0.233142	6.64453	3.04195e-11	1.16501e-09	IL32	9235	1.93501e-09	124	220	130	340	486	564
407	ENSG00000165502	2639.95	1.03043	0.155203	6.63924	3.15315e-11	1.20463e-09	RPL36AL	6166	2.00082e-09	1580	1628	1993	3574	2892	4173
408	ENSG00000168398	230.381	1.19627	0.180256	6.63652	3.21167e-11	1.22398e-09	BDKRB2	624	2.03296e-09	158	136	127	345	317	300
409	ENSG00000162063	139.157	-1.86749	0.281984	-6.62269	3.52713e-11	1.33892e-09	CCNF	899	2.22386e-09	248	268	142	49	74	53
410	ENSG00000120063	171.206	-1.63273	0.24654	-6.62255	3.53049e-11	1.33892e-09	GNA13	10672	2.22386e-09	273	272	241	96	106	40
411	ENSG00000024526	86.9269	-2.07333	0.313111	-6.6217	3.55103e-11	1.3429e-09	DEPDC1	55635	2.23048e-09	161	148	117	19	47	30
412	ENSG00000163131	92.7326	1.7061	0.257665	6.62139	3.55826e-11	1.3429e-09	CTSS	1520	2.23048e-09	37	40	54	122	145	159
413	ENSG00000007968	75.2355	-2.05009	0.309665	-6.62034	3.58363e-11	1.3492e-09	E2F2	1870	2.24094e-09	122	143	98	31	29	28
414	ENSG00000162366	92.3093	2.29341	0.346758	6.61387	3.74392e-11	1.40614e-09	PDZK1IP1	10158	2.33552e-09	23	55	17	115	181	164
415	ENSG00000100162	124.058	-1.69575	0.256576	-6.60913	3.86573e-11	1.44839e-09	CENPM	79019	2.40569e-09	197	223	150	72	56	48
416	ENSG00000162458	245.819	1.14115	0.172759	6.60545	3.96317e-11	1.48133e-09	FBLIM1	54751	2.4604e-09	141	163	158	352	351	310
417	ENSG00000118193	88.554	-2.09697	0.318232	-6.58944	4.41484e-11	1.6462e-09	KIF14	9928	2.73424e-09	161	162	113	26	48	20
418	ENSG00000131669	284.841	1.16575	0.177102	6.58239	4.62955e-11	1.72212e-09	NINJ1	4814	2.86035e-09	156	206	164	429	368	385
419	ENSG00000006534	2934.15	0.92254	0.140188	6.58074	4.68128e-11	1.73721e-09	ALDH3B1	221	2.88541e-09	1975	1811	2289	3863	3367	4299
420	ENSG00000106992	59.8063	1.96698	0.299018	6.57813	4.76395e-11	1.76368e-09	AK1	203	2.92938e-09	26	22	25	98	81	108
421	ENSG00000134419	2259.32	0.983118	0.149566	6.57314	4.92651e-11	1.81935e-09	RPS15A	6210	3.02183e-09	1373	1390	1788	3141	2568	3297
422	ENSG00000179715	212.818	1.39538	0.212296	6.5728	4.93771e-11	1.81935e-09	PCED1B	91523	3.02183e-09	96	100	155	333	285	307
423	ENSG00000228474	899.866	0.897953	0.136697	6.56892	5.06819e-11	1.86301e-09	OST4	100128731	3.09435e-09	606	626	650	1244	1032	1242
424	ENSG00000102854	91.6486	1.58732	0.241743	6.56615	5.16318e-11	1.89345e-09	MSLN	10232	3.14491e-09	46	49	42	141	142	128
425	ENSG00000175215	322.92	-1.11839	0.170422	-6.56246	5.29289e-11	1.93645e-09	CTDSP2	10106	3.21634e-09	439	434	449	232	177	207
426	ENSG00000170312	301.546	-1.32784	0.202358	-6.56187	5.31387e-11	1.93749e-09	CDK1	983	3.21805e-09	465	435	404	176	216	113
427	ENSG00000117360	322.572	-1.28979	0.196563	-6.56168	5.32064e-11	1.93749e-09	PRPF3	9129	3.21805e-09	437	379	552	187	159	222
428	ENSG00000205352	870.062	0.832157	0.126984	6.55325	5.62988e-11	2.0453e-09	PRR13	54458	3.39713e-09	616	613	648	1083	1112	1148
429	ENSG00000178999	166.78	-1.50323	0.229638	-6.54608	5.90656e-11	2.13795e-09	AURKB	9212	3.55102e-09	223	308	210	91	90	78
430	ENSG00000176619	481.713	-1.32679	0.202689	-6.54594	5.9124e-11	2.13795e-09	LMNB2	102466806	3.55102e-09	738	856	471	277	268	280
431	ENSG00000185101	27.5358	3.16004	0.483113	6.54098	6.11151e-11	2.20482e-09	ANO9	338440	3.66208e-09	7	2	7	51	50	48
432	ENSG00000135451	122.766	-1.52585	0.233489	-6.53498	6.36191e-11	2.28985e-09	TROAP	10024	3.8033e-09	184	193	173	66	68	53
433	ENSG00000101255	1412.87	-1.31302	0.200961	-6.53372	6.41573e-11	2.30388e-09	TRIB3	57761	3.82662e-09	1430	1767	2846	825	778	831
434	ENSG00000166619	297.064	1.0923	0.167223	6.53202	6.48881e-11	2.32476e-09	BLCAP	10904	3.86129e-09	204	173	194	412	435	365
435	ENSG00000077150	477.548	1.22037	0.186919	6.52885	6.6275e-11	2.36899e-09	NFKB2	4791	3.93475e-09	221	346	292	570	648	788
436	ENSG00000179526	549.663	0.926651	0.142085	6.5218	6.9468e-11	2.47743e-09	SHARPIN	81858	4.11486e-09	400	391	345	724	701	738
437	ENSG00000204386	424.16	1.01765	0.156291	6.51127	7.45192e-11	2.65149e-09	NEU1	4758	4.40397e-09	263	269	306	558	516	632
438	ENSG00000106462	105.813	-1.66441	0.255671	-6.50998	7.51625e-11	2.66827e-09	EZH2	2146	4.43184e-09	159	179	148	56	56	38
439	ENSG00000167513	208.247	-1.59558	0.245229	-6.50647	7.69396e-11	2.72513e-09	CDT1	81620	4.52629e-09	283	430	225	99	99	113
440	ENSG00000100612	468.685	1.05498	0.162167	6.50551	7.74316e-11	2.73633e-09	DHRS7	51635	4.54489e-09	286	269	358	652	578	670
441	ENSG00000182749	133.498	1.55413	0.239209	6.49695	8.19664e-11	2.89001e-09	PAQR7	164091	4.80015e-09	78	67	56	228	150	222
442	ENSG00000175063	421.126	-1.17688	0.181176	-6.49576	8.2614e-11	2.90626e-09	UBE2C	11065	4.82713e-09	569	710	475	262	271	239
443	ENSG00000175793	1119.73	1.07357	0.165377	6.49166	8.48956e-11	2.97978e-09	SFN	2810	4.94924e-09	743	862	556	1503	1382	1672
444	ENSG00000214391	560.376	-1.30063	0.200441	-6.48885	8.64919e-11	3.02897e-09	TUBAP2	NA	5.03095e-09	939	906	546	366	307	297
445	ENSG00000125944	682.11	-0.935951	0.144248	-6.48848	8.6708e-11	3.02971e-09	HNRNPR	10236	5.03218e-09	917	940	836	481	504	413
446	ENSG00000127564	120.08	-1.93938	0.299226	-6.48131	9.09312e-11	3.17016e-09	PKMYT1	9088	5.26545e-09	176	269	129	45	58	43
447	ENSG00000166340	555.002	1.03031	0.159036	6.47845	9.26721e-11	3.22362e-09	TPP1	1200	5.35425e-09	407	317	372	656	835	743
448	ENSG00000163346	215.472	1.33647	0.206436	6.47399	9.54472e-11	3.31274e-09	PBXIP1	57326	5.50228e-09	120	112	132	303	238	388
449	ENSG00000169174	518.247	-1.07548	0.166299	-6.46717	9.98523e-11	3.45322e-09	PCSK9	255738	5.73561e-09	679	802	622	302	312	393
450	ENSG00000109475	2035.33	1.07868	0.166796	6.46704	9.9939e-11	3.45322e-09	RPL34	6164	5.73561e-09	1185	1282	1452	3157	2048	3088
451	ENSG00000072778	1146.15	1.01472	0.157037	6.46165	1.03568e-10	3.57068e-09	ACADVL	37	5.93069e-09	777	767	726	1488	1240	1879
452	ENSG00000134590	852.925	0.83491	0.129292	6.45754	1.06415e-10	3.66074e-09	FAM127A	8933	6.08028e-09	643	603	594	1085	1142	1050
453	ENSG00000089486	100.692	1.53362	0.237688	6.45224	1.10206e-10	3.78277e-09	CDIP1	29965	6.28297e-09	49	53	53	129	147	174
454	ENSG00000139178	197.611	1.18368	0.18361	6.44667	1.14336e-10	3.91588e-09	C1RL	51279	6.50404e-09	121	126	114	284	251	290
455	ENSG00000102359	34.2002	2.58935	0.401897	6.44282	1.17276e-10	4.00776e-09	SRPX2	27286	6.65665e-09	10	8	12	47	61	68
456	ENSG00000064115	643.548	0.888443	0.138108	6.43297	1.25135e-10	4.26693e-09	TM7SF3	51768	7.08713e-09	481	435	439	780	878	849
457	ENSG00000131495	421.08	1.27344	0.198474	6.41615	1.39762e-10	4.75526e-09	NDUFA2	4695	7.89821e-09	228	255	251	665	407	720
458	ENSG00000250834	92.2859	1.69792	0.264734	6.41368	1.42051e-10	4.82075e-09	KRT18P54	NA	8.00699e-09	41	50	38	134	112	179
459	ENSG00000112984	299.602	-1.22318	0.190723	-6.41336	1.42343e-10	4.82075e-09	KIF20A	10112	8.00699e-09	471	454	335	197	177	164
460	ENSG00000241468	738.271	1.02448	0.159754	6.41285	1.42822e-10	4.82075e-09	ATP5J2	9551	8.00699e-09	482	470	503	1081	778	1116
461	ENSG00000233695	21.4222	3.55335	0.554107	6.41274	1.42927e-10	4.82075e-09	GAS6-AS1	NA	8.00699e-09	3	3	5	37	34	48
462	ENSG00000168653	2076.47	1.01426	0.158304	6.40705	1.48363e-10	4.99329e-09	NDUFS5	4725	8.29356e-09	1271	1247	1603	2983	2227	3128
463	ENSG00000185404	91.5837	1.5572	0.243222	6.4024	1.52958e-10	5.13682e-09	SP140L	93349	8.53197e-09	51	41	48	134	140	136
464	ENSG00000111445	149.694	-1.42867	0.223252	-6.39939	1.55998e-10	5.22763e-09	RFC5	5985	8.68279e-09	213	248	191	73	79	93
465	ENSG00000243147	728.874	0.917984	0.14374	6.38643	1.698e-10	5.67791e-09	MRPL33	9553	9.43068e-09	487	493	531	1050	831	982
466	ENSG00000088367	1696.49	0.833502	0.130688	6.3778	1.79649e-10	5.99435e-09	EPB41L1	2036	9.95628e-09	1286	1195	1173	2274	1911	2340
467	ENSG00000197756	7626.61	1.05268	0.16512	6.37521	1.82709e-10	6.08339e-09	RPL37A	6168	1.01042e-08	4594	4628	5657	11201	7647	12033
468	ENSG00000157168	163.157	1.37348	0.215622	6.36987	1.89188e-10	6.28567e-09	NRG1	3084	1.04401e-08	78	109	88	208	278	219
469	ENSG00000147274	1293.28	-0.833778	0.130925	-6.36837	1.91045e-10	6.33381e-09	RBMX	27316	1.05201e-08	1616	1696	1661	1040	901	846
470	ENSG00000172809	5199.81	1.04656	0.164417	6.36525	1.94975e-10	6.45036e-09	RPL38	6169	1.07137e-08	2984	3264	3924	7727	5317	7983
471	ENSG00000171320	77.9786	-2.21585	0.348591	-6.35659	2.06286e-10	6.81008e-09	ESCO2	157570	1.13112e-08	145	141	104	12	43	23
472	ENSG00000266472	755.82	1.04614	0.164587	6.35616	2.06859e-10	6.81038e-09	MRPS21	54460	1.13117e-08	492	464	518	1073	789	1199
473	ENSG00000163808	48.1337	-2.58072	0.406034	-6.35593	2.07172e-10	6.81038e-09	KIF15	56992	1.13117e-08	98	79	74	10	20	8
474	ENSG00000154839	90.2648	-1.85376	0.291705	-6.35491	2.0855e-10	6.84123e-09	SKA1	220134	1.13629e-08	117	161	147	24	45	48
475	ENSG00000123358	473.549	-1.02295	0.161056	-6.35153	2.13177e-10	6.97831e-09	NR4A1	3164	1.15906e-08	652	680	568	349	275	317
476	ENSG00000123473	80.7113	-2.01165	0.316739	-6.35111	2.13769e-10	6.98296e-09	STIL	6491	1.15983e-08	135	142	117	44	38	10
477	ENSG00000104812	722.016	0.886461	0.139593	6.35032	2.14864e-10	7.0022e-09	GYS1	2997	1.16302e-08	555	495	469	975	872	967
478	ENSG00000120699	145.517	-1.42768	0.224831	-6.35004	2.15258e-10	7.0022e-09	EXOSC8	11340	1.16302e-08	199	203	235	96	71	71
479	ENSG00000128524	500.255	1.03883	0.163741	6.34431	2.23428e-10	7.25278e-09	ATP6V1F	9296	1.20465e-08	300	306	373	733	569	720
480	ENSG00000183607	19.9681	3.78073	0.59598	6.34372	2.24285e-10	7.26544e-09	GKN2	200504	1.20675e-08	3	1	4	30	37	45
481	ENSG00000224294	25.4299	6.95531	1.09667	6.34219	2.26516e-10	7.32243e-09	RP3-326I13.1	101927501	1.21621e-08	1	0	0	45	58	48
482	ENSG00000164713	525.774	1.06607	0.168109	6.34154	2.27472e-10	7.33811e-09	BRI3	25798	1.21882e-08	284	377	356	708	609	821
483	ENSG00000175643	68.2789	-2.0266	0.319606	-6.34093	2.28382e-10	7.35218e-09	RMI2	116028	1.22116e-08	127	112	89	30	26	25
484	ENSG00000138166	335.731	1.02542	0.161799	6.33761	2.33358e-10	7.48869e-09	DUSP5	1847	1.24383e-08	226	211	227	392	475	484
485	ENSG00000165480	83.4155	-1.82268	0.287605	-6.33746	2.33585e-10	7.48869e-09	SKA3	221150	1.24383e-08	140	132	123	30	47	30
486	ENSG00000069812	33.2865	2.63974	0.416759	6.33397	2.38933e-10	7.64439e-09	HES2	54626	1.26969e-08	10	10	7	56	44	73
487	ENSG00000122566	6064.93	-0.799758	0.126415	-6.32643	2.50902e-10	8.01085e-09	HNRNPA2B1	3181	1.33056e-08	7783	7140	8180	4442	3956	4888
488	ENSG00000187840	789.671	-1.02433	0.161985	-6.32359	2.55563e-10	8.14292e-09	EIF4EBP1	1978	1.35249e-08	841	1161	1171	532	484	549
489	ENSG00000082898	537.547	-1.29278	0.204627	-6.31775	2.65399e-10	8.43905e-09	XPO1	7514	1.40168e-08	795	819	688	262	435	227
490	ENSG00000008988	7952.55	0.851243	0.134789	6.31537	2.6951e-10	8.55226e-09	RPS20	6224	1.42048e-08	5419	5189	6405	11173	8954	10575
491	ENSG00000101447	214.035	-1.4497	0.22959	-6.31429	2.71403e-10	8.59481e-09	FAM83D	81610	1.42755e-08	334	387	219	115	116	113
492	ENSG00000105323	2778.02	-0.779726	0.123492	-6.31396	2.71983e-10	8.59567e-09	HNRNPUL1	11100	1.42769e-08	3518	3797	3213	2035	1949	2156
493	ENSG00000173702	4351.8	0.897147	0.142102	6.31339	2.7298e-10	8.60966e-09	MUC13	56667	1.43001e-08	3653	2602	2868	5684	5899	5405
494	ENSG00000066279	133.344	-2.07535	0.329027	-6.30751	2.83553e-10	8.92504e-09	ASPM	259266	1.4824e-08	279	215	160	28	85	33
495	ENSG00000278771	70.5337	2.08876	0.331201	6.30663	2.8518e-10	8.9581e-09	Metazoa_SRP	NA	1.48789e-08	17	41	22	122	88	133
496	ENSG00000112742	92.2303	-1.83553	0.291113	-6.30524	2.87746e-10	9.02049e-09	TTK	7272	1.49825e-08	153	151	135	33	56	25
497	ENSG00000125450	210.952	-1.23374	0.195698	-6.30431	2.89476e-10	9.05645e-09	NUP85	79902	1.50423e-08	299	332	256	127	123	128
498	ENSG00000204540	26.9218	3.02855	0.480512	6.30276	2.92388e-10	9.12918e-09	PSORS1C1	170679	1.51631e-08	6	6	5	58	31	55
499	ENSG00000065911	629.717	-1.38879	0.220526	-6.29762	3.02244e-10	9.41803e-09	MTHFD2	10797	1.56428e-08	650	866	1226	316	443	277
500	ENSG00000163975	87.9123	1.65274	0.262463	6.29702	3.03415e-10	9.43561e-09	MELTF	4241	1.5672e-08	45	46	36	103	142	156
501	ENSG00000166451	127.563	-1.55167	0.246447	-6.29616	3.05113e-10	9.46946e-09	CENPN	55839	1.57282e-08	196	218	161	63	77	50
502	ENSG00000080546	47.3774	2.1022	0.33416	6.291	3.15433e-10	9.77025e-09	SESN1	27244	1.62278e-08	18	21	15	72	90	68
503	ENSG00000101849	360.667	-1.20929	0.192396	-6.28545	3.26898e-10	1.01052e-08	TBL1X	6907	1.67842e-08	579	519	420	213	262	171
504	ENSG00000108055	335.936	-1.22837	0.195534	-6.28212	3.33997e-10	1.03042e-08	SMC3	9126	1.71147e-08	450	496	476	171	263	159
505	ENSG00000221983	4025.26	0.8614	0.137165	6.28002	3.38532e-10	1.04234e-08	UBA52	7311	1.73127e-08	2715	2818	3035	5550	4311	5722
506	ENSG00000248538	46.1783	2.28954	0.364955	6.27349	3.53033e-10	1.08484e-08	RP11-10A14.5	101929128	1.80187e-08	13	21	13	51	89	91
507	ENSG00000060138	2107.37	0.740357	0.118108	6.26848	3.6459e-10	1.11815e-08	YBX3	8531	1.85718e-08	1557	1567	1607	2705	2458	2750
508	ENSG00000229638	2661.92	1.20029	0.192376	6.2393	4.39524e-10	1.34531e-08	RPL4P4	NA	2.23448e-08	1486	1569	1782	3818	2456	4861
509	ENSG00000096060	114.021	-1.49425	0.239581	-6.23692	4.46277e-10	1.36329e-08	FKBP5	2289	2.26435e-08	170	166	170	49	65	65
510	ENSG00000160007	819.194	-0.910323	0.146023	-6.2341	4.54384e-10	1.38534e-08	ARHGAP35	2909	2.30097e-08	1150	1129	934	586	600	516
511	ENSG00000158195	477.565	-0.927272	0.148789	-6.23213	4.60131e-10	1.40011e-08	WASF2	10163	2.32551e-08	644	631	604	358	326	302
512	ENSG00000020633	66.472	-1.92343	0.308881	-6.22709	4.75172e-10	1.44306e-08	RUNX3	864	2.39683e-08	103	110	102	24	29	30
513	ENSG00000164051	253.437	1.08949	0.175021	6.22491	4.81831e-10	1.46043e-08	CCDC51	79714	2.42568e-08	164	159	160	365	297	375
514	ENSG00000167106	192.714	1.21313	0.19495	6.22279	4.88384e-10	1.47741e-08	FAM102A	399665	2.45389e-08	114	114	119	234	249	327
515	ENSG00000105011	139.153	-1.60533	0.258196	-6.21746	5.05255e-10	1.52548e-08	ASF1B	55723	2.53373e-08	212	266	150	75	68	63
516	ENSG00000203875	2186.29	0.875577	0.140837	6.21695	5.06923e-10	1.52755e-08	SNHG5	NA	2.53717e-08	1389	1492	1746	3227	2612	2652
517	ENSG00000118007	127.518	-1.55734	0.25114	-6.20106	5.60831e-10	1.68672e-08	STAG1	10274	2.80155e-08	207	185	186	56	86	45
518	ENSG00000128311	740.651	0.905017	0.145981	6.19954	5.66292e-10	1.69986e-08	TST	7263	2.82337e-08	499	530	515	1057	819	1025
519	ENSG00000258130	72.1364	1.81886	0.293456	6.19807	5.71615e-10	1.71245e-08	RP11-347C12.3	NA	2.84428e-08	39	34	22	127	95	116
520	ENSG00000114391	6131.74	1.00084	0.161483	6.19777	5.72689e-10	1.71245e-08	RPL24	6152	2.84428e-08	3783	4163	4307	9237	6007	9293
521	ENSG00000146729	363.82	-1.00215	0.161709	-6.1972	5.74774e-10	1.71538e-08	GBAS	2631	2.84916e-08	515	444	498	260	237	229
522	ENSG00000105971	356.549	1.0282	0.165953	6.19571	5.80214e-10	1.7283e-08	CAV2	858	2.87061e-08	236	216	255	471	543	418
523	ENSG00000164938	41.5728	2.3659	0.38194	6.19442	5.85001e-10	1.73748e-08	TP53INP1	94241	2.88585e-08	13	16	12	54	99	55
524	ENSG00000050165	76.4802	1.77443	0.286462	6.19428	5.85528e-10	1.73748e-08	DKK3	27122	2.88585e-08	30	35	39	82	134	139
525	ENSG00000219023	428.58	1.25469	0.203206	6.17447	6.63869e-10	1.96351e-08	RP3-340B19.2	NA	3.26128e-08	204	244	308	635	445	735
526	ENSG00000175592	155.301	1.32123	0.213986	6.17438	6.64227e-10	1.96351e-08	FOSL1	8061	3.26128e-08	81	100	83	218	185	264
527	ENSG00000170144	1436.75	-0.755795	0.122454	-6.17207	6.74019e-10	1.98868e-08	HNRNPA3	100616394	3.30308e-08	1741	1776	1900	1080	1094	1030
528	ENSG00000104267	109.04	-1.72741	0.279919	-6.17112	6.7808e-10	1.99687e-08	CA2	760	3.31669e-08	201	156	146	73	47	30
529	ENSG00000117226	53.7319	2.00471	0.324923	6.16978	6.83836e-10	2.01001e-08	GBP3	2635	3.33852e-08	27	17	21	87	102	68
530	ENSG00000166441	10431.2	0.935437	0.151725	6.16534	7.0334e-10	2.06344e-08	RPL27A	6157	3.42725e-08	6721	6829	7933	15108	10661	15335
531	ENSG00000258150	69.2683	1.83315	0.297458	6.16273	7.15034e-10	2.0938e-08	RP11-345J4.3	NA	3.47768e-08	38	31	21	124	93	108
532	ENSG00000125967	176.057	1.25617	0.203865	6.16178	7.19312e-10	2.10237e-08	NECAB3	63941	3.49191e-08	114	102	94	291	211	244
533	ENSG00000250337	34.2079	2.48137	0.403108	6.15561	7.47892e-10	2.1818e-08	LINC01021	643401	3.62384e-08	9	11	12	45	75	53
534	ENSG00000141522	1307.19	-0.925827	0.150652	-6.14545	7.9738e-10	2.32181e-08	ARHGDIA	396	3.85639e-08	1843	1916	1378	935	874	897
535	ENSG00000119632	72.9559	1.74976	0.284771	6.14444	8.02453e-10	2.33221e-08	IFI27L2	83982	3.87367e-08	28	35	36	108	90	141
536	ENSG00000130816	421.004	-1.09066	0.177517	-6.14398	8.04765e-10	2.33457e-08	DNMT1	1786	3.87759e-08	579	679	463	270	280	254
537	ENSG00000105204	153.213	1.472	0.239636	6.14263	8.11639e-10	2.35013e-08	DYRK1B	9149	3.90343e-08	74	59	109	209	208	259
538	ENSG00000180155	47.8807	2.15259	0.350849	6.13538	8.49568e-10	2.45538e-08	LYNX1	66004	4.07824e-08	20	14	17	63	65	108
539	ENSG00000001084	372.361	-0.997503	0.162785	-6.12773	8.91421e-10	2.57156e-08	GCLC	2729	4.27122e-08	472	480	540	230	272	239
540	ENSG00000105968	709.814	-0.852063	0.139247	-6.1191	9.41076e-10	2.70978e-08	H2AFV	94239	4.50078e-08	920	950	868	551	473	496
541	ENSG00000215182	19726.2	1.09182	0.178541	6.1152	9.64356e-10	2.77168e-08	MUC5AC	4586	4.6036e-08	15639	9594	12562	21087	28320	31155
542	ENSG00000106804	692.719	1.00064	0.163712	6.11222	9.82542e-10	2.81873e-08	C5	727	4.68176e-08	486	379	523	862	1063	844
543	ENSG00000146054	63.1271	-1.99607	0.326634	-6.11102	9.89944e-10	2.82955e-08	TRIM7	81786	4.69972e-08	114	94	93	30	21	28
544	ENSG00000112739	220.128	-1.17355	0.192039	-6.11102	9.89952e-10	2.82955e-08	PRPF4B	8899	4.69972e-08	342	301	275	126	147	131
545	ENSG00000130513	501.659	2.64842	0.433504	6.10934	1.00043e-09	2.85426e-08	GDF15	9518	4.74077e-08	92	98	225	811	788	997
546	ENSG00000130770	531.281	0.964266	0.157963	6.10439	1.03193e-09	2.93872e-08	ATPIF1	93974	4.88105e-08	342	319	419	764	647	698
547	ENSG00000235552	3418.25	0.845176	0.138531	6.10101	1.054e-09	2.9961e-08	RPL6P27	NA	4.97635e-08	2301	2410	2619	4969	3680	4531
548	ENSG00000247627	63.6183	2.62447	0.43019	6.10072	1.05595e-09	2.99615e-08	MTND4P12	NA	4.97643e-08	19	11	22	106	39	184
549	ENSG00000175216	965.695	-0.7997	0.131162	-6.09705	1.08042e-09	3.06e-08	CKAP5	9793	5.08248e-08	1266	1248	1165	652	727	735
550	ENSG00000160606	312.276	1.05159	0.1725	6.09619	1.08629e-09	3.07103e-08	TLCD1	116238	5.1008e-08	203	206	197	392	369	506
551	ENSG00000165092	62917.8	0.800106	0.131256	6.09575	1.08928e-09	3.07389e-08	ALDH1A1	216	5.10556e-08	46413	39784	51516	86366	73498	79930
552	ENSG00000112514	762.306	0.923668	0.151734	6.08741	1.14751e-09	3.23236e-08	CUTA	51596	5.36876e-08	528	496	551	1115	824	1060
553	ENSG00000100911	1035.31	0.996924	0.163819	6.08552	1.16117e-09	3.26493e-08	PSME2	102465801	5.42286e-08	636	664	768	1469	1071	1604
554	ENSG00000117713	284.074	-1.23762	0.20339	-6.08497	1.16516e-09	3.27024e-08	ARID1A	8289	5.43168e-08	432	455	314	145	200	159
555	ENSG00000232533	67.7715	1.66895	0.274364	6.08296	1.17983e-09	3.30544e-08	AC093673.5	NA	5.49015e-08	35	29	32	103	99	108
556	ENSG00000185189	109.669	1.41611	0.232835	6.08203	1.18671e-09	3.31874e-08	NRBP2	102466748	5.51224e-08	54	54	72	155	167	156
557	ENSG00000218426	2179.97	0.971914	0.159927	6.07724	1.22267e-09	3.40758e-08	RP11-475C16.1	NA	5.6598e-08	1359	1385	1667	3145	2234	3289
558	ENSG00000101846	156.98	1.44564	0.237879	6.07722	1.22286e-09	3.40758e-08	STS	412	5.6598e-08	103	84	68	220	293	174
559	ENSG00000179292	200.002	1.26388	0.208045	6.07505	1.23952e-09	3.44781e-08	TMEM151A	256472	5.72661e-08	112	129	111	208	303	337
560	ENSG00000104979	867.944	0.987967	0.162647	6.07431	1.24521e-09	3.45746e-08	C19orf53	28974	5.74264e-08	524	596	621	1261	901	1305
561	ENSG00000167526	14782.9	0.914135	0.150685	6.06654	1.30694e-09	3.6224e-08	RPL13	6137	6.0166e-08	9477	10529	10738	20633	14961	22359
562	ENSG00000263740	64.6435	1.88194	0.3104	6.06294	1.33655e-09	3.69787e-08	RN7SL4P	NA	6.14195e-08	20	33	28	108	77	121
563	ENSG00000218891	215.934	1.12018	0.184889	6.05865	1.37268e-09	3.79107e-08	ZNF579	163033	6.29676e-08	122	149	136	277	277	335
564	ENSG00000121892	379.927	-1.10181	0.182045	-6.0524	1.42706e-09	3.92828e-08	PDS5A	23244	6.52464e-08	531	556	476	199	299	219
565	ENSG00000188486	398.439	-1.31694	0.217592	-6.05236	1.42741e-09	3.92828e-08	H2AFX	3014	6.52464e-08	553	761	393	249	232	201
566	ENSG00000197958	8116.11	0.828839	0.136973	6.0511	1.43856e-09	3.95198e-08	RPL12	6136	6.56401e-08	5601	5632	6302	11334	8598	11230
567	ENSG00000139734	85.9896	-1.85544	0.306756	-6.04857	1.46135e-09	4.0075e-08	DIAPH3	81624	6.65622e-08	156	147	106	31	50	25
568	ENSG00000138092	128.57	-1.46422	0.242092	-6.04819	1.46478e-09	4.00984e-08	CENPO	79172	6.66011e-08	195	215	153	68	62	78
569	ENSG00000113712	290.676	-1.03085	0.170494	-6.04622	1.48284e-09	4.05213e-08	CSNK1A1	1452	6.73036e-08	378	418	378	204	195	171
570	ENSG00000119943	77.2151	1.64156	0.271545	6.04526	1.49165e-09	4.06907e-08	PYROXD2	100302133	6.75849e-08	46	35	31	113	108	131
571	ENSG00000176485	526.907	0.867753	0.143591	6.04323	1.5106e-09	4.11354e-08	PLA2G16	11145	6.83235e-08	358	410	352	666	691	685
572	ENSG00000140396	154.189	-1.41983	0.234981	-6.04232	1.51913e-09	4.12953e-08	NCOA2	10499	6.85891e-08	257	218	205	94	99	53
573	ENSG00000058804	242.668	-1.56259	0.259172	-6.02918	1.64798e-09	4.46968e-08	NDC1	55706	7.42388e-08	408	379	312	106	185	65
574	ENSG00000131080	68.8862	1.75408	0.290942	6.02898	1.65001e-09	4.46968e-08	EDA2R	60401	7.42388e-08	34	23	38	113	116	88
575	ENSG00000110958	1559.52	-1.21817	0.20216	-6.02579	1.6829e-09	4.55084e-08	PTGES3	10728	7.55869e-08	2370	2083	2106	827	1335	637
576	ENSG00000071082	4869.15	0.966503	0.1605	6.02183	1.72453e-09	4.65534e-08	RPL31	6160	7.73225e-08	2944	3084	3857	6837	5051	7442
577	ENSG00000136010	172.913	-1.28998	0.214257	-6.02072	1.73645e-09	4.67939e-08	ALDH1L2	160428	7.7722e-08	235	267	239	80	121	96
578	ENSG00000167553	3490.21	-0.976947	0.162513	-6.01151	1.83801e-09	4.9445e-08	TUBA1C	84790	8.21254e-08	4999	5405	3483	2616	2252	2186
579	ENSG00000114383	235.178	1.10208	0.183352	6.01072	1.84701e-09	4.96012e-08	TUSC2	11334	8.23848e-08	148	152	145	297	284	385
580	ENSG00000181026	716.904	0.819734	0.136427	6.0086	1.87127e-09	5.01661e-08	AEN	64782	8.33231e-08	504	531	517	931	833	985
581	ENSG00000165490	49.4463	-2.2162	0.368865	-6.00816	1.87643e-09	5.0218e-08	DDIAS	220042	8.34092e-08	80	89	77	14	22	15
582	ENSG00000140577	359.665	-0.946603	0.157772	-5.99982	1.97537e-09	5.2775e-08	CRTC3	64784	8.76563e-08	496	450	476	244	254	237
583	ENSG00000104833	189.854	1.14151	0.190363	5.99649	2.01623e-09	5.37743e-08	TUBB4A	10382	8.93161e-08	131	115	109	291	251	242
584	ENSG00000085871	577.549	1.01748	0.16973	5.99469	2.03869e-09	5.42801e-08	MGST2	4258	9.01562e-08	379	317	448	872	661	788
585	ENSG00000205420	150.596	1.46991	0.245276	5.99287	2.06171e-09	5.47992e-08	KRT6A	3853	9.10183e-08	85	97	59	169	277	217
586	ENSG00000187741	73.4396	-1.94025	0.323842	-5.99136	2.08098e-09	5.52171e-08	FANCA	2175	9.17124e-08	124	142	86	37	32	20
587	ENSG00000196975	3682.5	0.80374	0.134217	5.98837	2.11954e-09	5.61444e-08	ANXA4	307	9.32526e-08	2763	2354	2926	4962	4148	4941
588	ENSG00000025770	276.691	-1.05979	0.177046	-5.98595	2.15136e-09	5.68903e-08	NCAPH2	29781	9.44915e-08	371	414	335	185	171	184
589	ENSG00000151176	758.405	0.840749	0.140607	5.97943	2.23919e-09	5.91123e-08	PLBD2	196463	9.81822e-08	583	509	539	865	1025	1030
590	ENSG00000143278	22.0775	3.51292	0.587603	5.97838	2.25364e-09	5.93245e-08	F13B	2165	9.85346e-08	2	1	8	35	44	43
591	ENSG00000188549	64.1964	2.10423	0.351978	5.97829	2.25486e-09	5.93245e-08	C15orf52	388115	9.85346e-08	19	29	25	52	112	149
592	ENSG00000188846	5635.6	0.868458	0.145356	5.97472	2.30491e-09	6.05389e-08	RPL14	9045	1.00552e-07	3716	3837	4407	7502	5953	8399
593	ENSG00000171219	82.6863	1.53567	0.257301	5.96837	2.39636e-09	6.28347e-08	CDC42BPG	55561	1.04365e-07	46	41	38	110	116	144
594	ENSG00000073060	1637.54	0.855941	0.143463	5.96627	2.42732e-09	6.3483e-08	SCARB1	949	1.05442e-07	1257	1251	985	1964	2006	2362
595	ENSG00000165732	1069.5	-1.02089	0.171114	-5.96614	2.42925e-09	6.3483e-08	DDX21	9188	1.05442e-07	1469	1511	1332	701	883	521
596	ENSG00000133226	363.958	-1.01569	0.170374	-5.96153	2.49883e-09	6.51918e-08	SRRM1	10250	1.0828e-07	521	522	421	234	263	222
597	ENSG00000136869	30.5128	2.55289	0.428258	5.9611	2.50546e-09	6.52552e-08	TLR4	7099	1.08385e-07	11	8	9	40	68	48
598	ENSG00000119335	1695.59	-0.745443	0.125058	-5.96079	2.5102e-09	6.52693e-08	SET	6418	1.08409e-07	2028	2230	2120	1228	1371	1196
599	ENSG00000140262	293.561	-1.10801	0.186148	-5.9523	2.644e-09	6.85263e-08	TCF12	6938	1.13818e-07	426	393	392	181	225	144
600	ENSG00000162734	513.364	0.957208	0.160814	5.95228	2.64427e-09	6.85263e-08	PEA15	8682	1.13818e-07	336	412	299	626	704	703
601	ENSG00000187608	48.9811	2.05371	0.345222	5.94895	2.69866e-09	6.98193e-08	ISG15	9636	1.15966e-07	18	24	14	80	62	96
602	ENSG00000177311	854.456	-0.92425	0.155423	-5.94667	2.73659e-09	7.06832e-08	ZBTB38	253461	1.17401e-07	1212	1070	1086	623	671	466
603	ENSG00000030582	1065.02	0.960431	0.161518	5.94628	2.74305e-09	7.07325e-08	GRN	2896	1.17483e-07	670	693	802	1230	1241	1755
604	ENSG00000182195	615.677	0.795237	0.13387	5.94037	2.84384e-09	7.32099e-08	LDOC1	23641	1.21597e-07	449	463	437	776	772	796
605	ENSG00000169241	334.925	1.07141	0.180477	5.93655	2.91091e-09	7.48128e-08	SLC50A1	55974	1.2426e-07	188	219	237	481	367	516
606	ENSG00000113569	246.555	-1.26255	0.212928	-5.92947	3.03909e-09	7.79784e-08	NUP155	9631	1.29518e-07	390	381	279	126	180	123
607	ENSG00000011260	350.042	-0.973529	0.164268	-5.92645	3.09552e-09	7.92952e-08	UTP18	51096	1.31705e-07	446	449	500	246	252	207
608	ENSG00000094914	533.77	-0.93057	0.157051	-5.92528	3.11764e-09	7.96305e-08	AAAS	8086	1.32262e-07	743	729	625	413	327	365
609	ENSG00000231500	10720	0.998296	0.168483	5.92522	3.11885e-09	7.96305e-08	RPS18	6222	1.32262e-07	6164	6949	8339	15537	10680	16652
610	ENSG00000221829	157.654	-1.33716	0.225874	-5.91997	3.22001e-09	8.19886e-08	FANCG	2189	1.36178e-07	236	247	190	99	73	101
611	ENSG00000051825	134.487	-1.4624	0.247032	-5.91988	3.22175e-09	8.19886e-08	MPHOSPH9	10198	1.36178e-07	205	208	187	68	94	45
612	ENSG00000136881	87.2993	1.54481	0.261358	5.91071	3.40643e-09	8.65467e-08	BAAT	570	1.43749e-07	35	47	51	108	133	149
613	ENSG00000196743	594.947	0.841935	0.1425	5.90833	3.45598e-09	8.76623e-08	GM2A	2760	1.45602e-07	428	401	446	745	709	841
614	ENSG00000103485	81.0246	2.18863	0.370469	5.90772	3.46876e-09	8.78432e-08	QPRT	105369247	1.45903e-07	16	23	48	82	118	199
615	ENSG00000225405	50.8504	2.13201	0.361173	5.90301	3.56937e-09	9.02441e-08	RPS15AP17	NA	1.4989e-07	17	16	23	78	53	118
616	ENSG00000163171	143.977	1.25033	0.212129	5.89422	3.76446e-09	9.5022e-08	CDC42EP3	10602	1.57826e-07	88	88	81	169	234	204
617	ENSG00000230202	891.083	0.956195	0.16228	5.89226	3.8094e-09	9.60007e-08	RP11-632C17__A.1	NA	1.59452e-07	555	558	702	1258	955	1320
618	ENSG00000088930	680.966	-0.87683	0.148824	-5.89172	3.822e-09	9.61624e-08	XRN2	22803	1.5972e-07	919	899	836	478	544	411
619	ENSG00000163781	171.566	-1.49274	0.253379	-5.89133	3.83103e-09	9.62337e-08	TOPBP1	11073	1.59839e-07	285	293	186	65	116	86
620	ENSG00000170855	413.275	1.0713	0.181902	5.88945	3.87484e-09	9.71773e-08	TRIAP1	51499	1.61406e-07	272	247	284	624	643	408
621	ENSG00000006327	680.195	1.11045	0.188722	5.88405	4.00339e-09	1.0024e-07	TNFRSF12A	51330	1.66492e-07	374	575	342	823	944	1022
622	ENSG00000169718	635.671	0.895754	0.152255	5.88327	4.02248e-09	1.00556e-07	DUS1L	64118	1.67017e-07	424	515	393	799	788	897
623	ENSG00000220842	317.073	1.16471	0.197994	5.88255	4.03994e-09	1.0083e-07	RP11-572P18.1	NA	1.67473e-07	175	214	194	474	319	526
624	ENSG00000151136	178.954	1.20698	0.205193	5.88219	4.04885e-09	1.0089e-07	BTBD11	121551	1.67573e-07	108	123	95	220	296	232
625	ENSG00000168066	1189.51	-0.984987	0.167529	-5.87951	4.11475e-09	1.02368e-07	SF1	7536	1.70028e-07	1691	1836	1220	827	871	693
626	ENSG00000128422	185.807	1.63657	0.278754	5.87101	4.33144e-09	1.07587e-07	KRT17	3872	1.78696e-07	61	86	125	169	312	363
627	ENSG00000164087	86.3779	-1.63571	0.278761	-5.86777	4.41705e-09	1.09539e-07	POC1A	25886	1.81937e-07	140	141	109	38	39	50
628	ENSG00000214748	91.6946	1.70843	0.291314	5.86456	4.50323e-09	1.11498e-07	RP11-332E4.1	NA	1.85192e-07	31	55	41	141	100	181
629	ENSG00000163507	77.5861	-1.8648	0.318066	-5.86294	4.54731e-09	1.1241e-07	KIAA1524	57650	1.86707e-07	148	124	98	35	43	18
630	ENSG00000189079	87.5573	-1.63236	0.278701	-5.85703	4.71222e-09	1.16302e-07	ARID2	196528	1.93171e-07	137	136	129	38	55	30
631	ENSG00000123349	1536.97	0.953779	0.162889	5.85539	4.75904e-09	1.17272e-07	PFDN5	5204	1.94781e-07	938	1016	1182	2227	1565	2294
632	ENSG00000231747	238.497	1.16847	0.19962	5.85345	4.81469e-09	1.18455e-07	AC079922.2	NA	1.96747e-07	148	122	170	398	281	312
633	ENSG00000253729	1573.36	-0.994402	0.17005	-5.84771	4.98385e-09	1.22423e-07	PRKDC	5591	2.03338e-07	2307	2335	1650	933	1270	944
634	ENSG00000204616	1145.56	0.850947	0.145602	5.84434	5.08571e-09	1.24728e-07	TRIM31	11074	2.07166e-07	826	714	908	1551	1288	1587
635	ENSG00000168918	19.8962	3.2235	0.5519	5.84074	5.1969e-09	1.27254e-07	INPP5D	3635	2.11362e-07	3	3	5	37	46	25
636	ENSG00000157193	169.567	-1.21613	0.208332	-5.83745	5.30043e-09	1.29586e-07	LRP8	7804	2.15234e-07	256	247	211	99	113	91
637	ENSG00000230409	326.172	-0.991961	0.169959	-5.83648	5.3315e-09	1.30141e-07	TCEA1P2	NA	2.16156e-07	426	439	442	194	252	204
638	ENSG00000068903	415.777	0.895554	0.153534	5.83294	5.44592e-09	1.32725e-07	SIRT2	22933	2.20449e-07	309	269	292	525	504	597
639	ENSG00000069998	164.961	-1.21289	0.208086	-5.82881	5.58251e-09	1.35841e-07	CECR5	27440	2.25624e-07	216	258	216	105	94	101
640	ENSG00000168497	112.801	1.34707	0.231142	5.82791	5.6125e-09	1.36357e-07	SDPR	8436	2.26482e-07	65	62	64	129	168	189
641	ENSG00000116350	294.93	-1.04651	0.179581	-5.82753	5.62527e-09	1.36455e-07	SRSF4	6429	2.26643e-07	410	401	376	225	160	196
642	ENSG00000139112	320.053	1.0569	0.181418	5.82578	5.68472e-09	1.3765e-07	GABARAPL1	23710	2.28629e-07	204	171	247	453	384	461
643	ENSG00000136628	1682.04	-0.82632	0.141844	-5.82556	5.69226e-09	1.3765e-07	EPRS	2058	2.28629e-07	2015	1971	2473	1212	1330	1090
644	ENSG00000134684	1515.47	-0.849482	0.145996	-5.81851	5.93741e-09	1.43355e-07	YARS	8565	2.38105e-07	1688	1886	2269	1066	1003	1181
645	ENSG00000186815	701	0.838287	0.144166	5.81472	6.07351e-09	1.46414e-07	TPCN1	53373	2.43185e-07	576	471	461	910	910	876
646	ENSG00000226976	1459.29	1.08103	0.185927	5.81428	6.0896e-09	1.46575e-07	COX6A1P2	NA	2.43452e-07	858	792	1156	2206	1451	2292
647	ENSG00000156873	109.924	1.30454	0.224504	5.81077	6.21848e-09	1.49263e-07	PHKG2	5261	2.47918e-07	70	62	58	153	162	154
648	ENSG00000111530	550.895	-1.11294	0.191532	-5.81072	6.2205e-09	1.49263e-07	CAND1	55832	2.47918e-07	833	737	702	340	452	242
649	ENSG00000186185	97.8135	-1.73154	0.298314	-5.80443	6.45838e-09	1.54732e-07	KIF18B	146909	2.57002e-07	139	201	111	35	47	55
650	ENSG00000067182	2445.01	-0.881294	0.151919	-5.80107	6.58939e-09	1.57628e-07	TNFRSF1A	7132	2.61812e-07	3438	2882	3185	2096	1450	1619
651	ENSG00000171848	322.665	-1.36747	0.235867	-5.79763	6.72591e-09	1.60647e-07	RRM2	6241	2.66825e-07	495	576	333	183	231	118
652	ENSG00000120885	4540.89	0.993527	0.1714	5.79655	6.76924e-09	1.61434e-07	CLU	102465508	2.68132e-07	2715	2698	3692	5163	5350	7628
653	ENSG00000164985	280.928	-1.02866	0.177753	-5.787	7.16556e-09	1.70624e-07	PSIP1	11168	2.83396e-07	346	360	422	188	170	199
654	ENSG00000172534	663.445	-1.06026	0.183267	-5.78536	7.23555e-09	1.72027e-07	HCFC1	3054	2.85727e-07	971	1071	651	422	458	408
655	ENSG00000188706	668.363	0.846802	0.146395	5.78437	7.27861e-09	1.72786e-07	ZDHHC9	51114	2.86988e-07	493	437	506	774	961	839
656	ENSG00000065150	879.648	-0.947296	0.163836	-5.782	7.38193e-09	1.74972e-07	IPO5	3843	2.90618e-07	1201	1227	1059	569	739	484
657	ENSG00000136888	287.487	1.02098	0.17671	5.7777	7.57298e-09	1.79227e-07	ATP6V1G1	9550	2.97686e-07	179	171	217	347	372	438
658	ENSG00000135829	1289.01	-0.890156	0.154089	-5.77691	7.6084e-09	1.79792e-07	DHX9	1660	2.98624e-07	1872	1767	1391	867	1026	811
659	ENSG00000168496	481.747	-1.18684	0.205553	-5.77389	7.7463e-09	1.82773e-07	FEN1	2237	3.03575e-07	717	814	484	274	357	244
660	ENSG00000143217	18.889	3.55121	0.615437	5.77023	7.9162e-09	1.86498e-07	NECTIN4	81607	3.09763e-07	1	4	4	21	33	50
661	ENSG00000090238	41.0869	2.13658	0.370331	5.76939	7.95579e-09	1.87148e-07	YPEL3	83719	3.10842e-07	11	14	19	70	51	81
662	ENSG00000103257	15064.2	-0.731119	0.12673	-5.76913	7.96833e-09	1.87159e-07	SLC7A5	8140	3.10861e-07	19055	20957	16394	10744	11811	11424
663	ENSG00000125505	1321.61	0.758571	0.131551	5.76638	8.09945e-09	1.89952e-07	MBOAT7	79143	3.155e-07	1063	1012	868	1641	1614	1730
664	ENSG00000235174	6198.4	0.973513	0.168873	5.76476	8.17722e-09	1.91455e-07	RPL39P3	NA	3.17995e-07	3642	3785	5119	9860	6554	8230
665	ENSG00000110195	20.5118	3.27623	0.568342	5.76454	8.18813e-09	1.91455e-07	FOLR1	2348	3.17995e-07	3	3	5	26	28	58
666	ENSG00000158104	102.356	1.65951	0.288	5.76218	8.30348e-09	1.9386e-07	HPD	3242	3.21991e-07	66	35	46	204	117	146
667	ENSG00000029993	928.908	-0.731764	0.127026	-5.76073	8.3752e-09	1.95241e-07	HMGB3	3149	3.24285e-07	1162	1161	1153	682	687	728
668	ENSG00000126709	43.962	2.03024	0.352484	5.7598	8.42126e-09	1.96021e-07	IFI6	2537	3.2558e-07	14	18	20	63	59	91
669	ENSG00000151503	140.542	-1.32318	0.229768	-5.75877	8.47271e-09	1.96924e-07	NCAPD3	23310	3.2708e-07	214	223	164	87	76	78
670	ENSG00000197568	82.5222	1.58109	0.274614	5.75751	8.53644e-09	1.98109e-07	HHLA3	11147	3.29048e-07	46	29	47	117	109	146
671	ENSG00000070214	276.81	-1.14048	0.198167	-5.75515	8.65664e-09	2.00391e-07	SLC44A1	23446	3.32838e-07	429	357	364	178	209	123
672	ENSG00000094916	1175.49	-0.810988	0.140917	-5.75507	8.66055e-09	2.00391e-07	CBX5	100616400	3.32838e-07	1537	1467	1498	808	993	750
673	ENSG00000197565	83.2255	1.47993	0.257285	5.7521	8.81436e-09	2.03647e-07	COL4A6	1288	3.38246e-07	42	48	41	112	111	146
674	ENSG00000166206	1629.96	-0.856669	0.148941	-5.75172	8.83392e-09	2.03667e-07	GABRB3	2562	3.38278e-07	2272	1789	2246	1259	1234	980
675	ENSG00000204592	427.798	0.944432	0.164204	5.75158	8.8414e-09	2.03667e-07	HLA-E	3133	3.38278e-07	296	265	313	506	517	670
676	ENSG00000240849	225.023	0.996594	0.173307	5.75047	8.89976e-09	2.04708e-07	TMEM189	387521	3.40008e-07	148	146	156	297	287	317
677	ENSG00000125686	282.16	-0.999265	0.174013	-5.74248	9.32973e-09	2.14281e-07	MED1	5469	3.55908e-07	393	395	343	176	204	181
678	ENSG00000123243	68.4407	1.83943	0.320503	5.73918	9.51362e-09	2.18182e-07	ITIH5	80760	3.62387e-07	23	26	38	92	79	151
679	ENSG00000148484	708.589	0.771894	0.134641	5.73296	9.86902e-09	2.25999e-07	RSU1	6251	3.75372e-07	502	560	509	870	935	874
680	ENSG00000120992	216.359	-1.25622	0.219217	-5.73049	1.0014e-08	2.28981e-07	LYPLA1	10434	3.80324e-07	336	323	264	145	151	81
681	ENSG00000187514	4216.63	-0.776576	0.135529	-5.72995	1.00458e-08	2.29372e-07	PTMA	100302285	3.80973e-07	5344	5665	4956	3293	2620	3423
682	ENSG00000123684	801.928	-0.880407	0.15373	-5.72697	1.02239e-08	2.33095e-07	LPGAT1	9926	3.87157e-07	1085	906	1135	574	629	484
683	ENSG00000166130	287.516	1.0852	0.189546	5.72526	1.03275e-08	2.35114e-07	IKBIP	121457	3.90511e-07	188	193	176	335	494	340
684	ENSG00000204264	57.2109	1.80941	0.316149	5.72329	1.04481e-08	2.37512e-07	PSMB8	5696	3.94493e-07	22	28	25	103	65	101
685	ENSG00000189060	1315.29	-1.06447	0.186064	-5.72099	1.05904e-08	2.40394e-07	H1F0	3005	3.9928e-07	1378	1685	2271	740	777	1043
686	ENSG00000070081	594.245	1.01143	0.176869	5.71853	1.0745e-08	2.43549e-07	NUCB2	105376575	4.0452e-07	395	305	484	724	884	773
687	ENSG00000112759	105.045	-1.67205	0.292516	-5.71608	1.09012e-08	2.46729e-07	SLC29A1	2030	4.09802e-07	163	210	108	44	56	50
688	ENSG00000167693	295.485	1.12813	0.197605	5.70905	1.13608e-08	2.56758e-07	NXN	64359	4.2646e-07	188	228	139	359	405	453
689	ENSG00000143924	304.373	-1.08324	0.189802	-5.70724	1.14822e-08	2.59125e-07	EML4	27436	4.30392e-07	432	415	403	183	245	149
690	ENSG00000125691	6739.82	0.849638	0.148907	5.70583	1.15779e-08	2.60906e-07	RPL23	9349	4.3335e-07	4242	4702	5483	8979	7146	9887
691	ENSG00000237550	1130.49	0.871866	0.152967	5.6997	1.20017e-08	2.70064e-07	RPL9P9	NA	4.4856e-07	758	727	909	1652	1227	1511
692	ENSG00000169375	359.885	-0.901732	0.158315	-5.69579	1.228e-08	2.75927e-07	SIN3A	25942	4.58299e-07	484	476	446	232	259	262
693	ENSG00000110455	65.7329	1.60863	0.282459	5.6951	1.23298e-08	2.76646e-07	ACCS	84680	4.59492e-07	34	29	34	84	100	113
694	ENSG00000126267	4858.31	0.935303	0.164267	5.69378	1.24254e-08	2.78389e-07	COX6B1	1340	4.62389e-07	3292	3001	3711	7280	4726	7140
695	ENSG00000120805	529.341	0.892448	0.156871	5.68905	1.27745e-08	2.85799e-07	ARL1	400	4.74696e-07	387	330	398	654	787	620
696	ENSG00000196576	1702.57	0.906279	0.159397	5.68567	1.30304e-08	2.91105e-07	PLXNB2	23654	4.83509e-07	1207	1363	981	1889	2166	2609
697	ENSG00000112299	20.667	2.96238	0.521282	5.68287	1.32456e-08	2.95488e-07	VNN1	8876	4.90789e-07	5	4	5	45	37	28
698	ENSG00000089009	11676.6	0.740465	0.130338	5.68112	1.33813e-08	2.98089e-07	RPL6	6128	4.95109e-07	8531	8384	9313	16078	12447	15307
699	ENSG00000120889	830.749	0.716441	0.12612	5.68062	1.34208e-08	2.98541e-07	TNFRSF10B	8795	4.9586e-07	626	632	628	1029	1032	1038
700	ENSG00000054392	39.7804	2.02525	0.356961	5.67358	1.39841e-08	3.10627e-07	HHAT	55733	5.15934e-07	17	13	17	56	65	71
701	ENSG00000105778	288.584	-0.96788	0.170614	-5.67293	1.40373e-08	3.11364e-07	AVL9	23080	5.17157e-07	386	385	380	194	216	171
702	ENSG00000162545	835.906	-1.00474	0.177132	-5.6723	1.40896e-08	3.12078e-07	CAMK2N1	55450	5.18344e-07	1098	1002	1244	720	447	504
703	ENSG00000110047	811.551	0.915949	0.161628	5.66702	1.45303e-08	3.21382e-07	EHD1	10938	5.33797e-07	623	626	438	977	1106	1101
704	ENSG00000092853	75.1075	-1.95785	0.345595	-5.66516	1.4689e-08	3.24431e-07	CLSPN	63967	5.38862e-07	126	160	74	31	36	23
705	ENSG00000143321	3040.92	-0.701539	0.123885	-5.66282	1.48906e-08	3.28417e-07	HDGF	3068	5.45483e-07	3866	3917	3510	2470	2101	2382
706	ENSG00000119681	88.3264	1.4307	0.252704	5.66157	1.49998e-08	3.30358e-07	LTBP2	4053	5.48705e-07	39	51	52	122	119	146
707	ENSG00000055917	300.694	-0.983933	0.173836	-5.66011	1.51275e-08	3.32697e-07	PUM2	23369	5.52591e-07	409	421	374	187	230	184
708	ENSG00000100949	217.176	1.09334	0.193341	5.65497	1.55876e-08	3.42334e-07	RABGGTA	5875	5.68596e-07	132	154	128	330	243	317
709	ENSG00000049541	339.937	-0.965048	0.170695	-5.65363	1.57099e-08	3.44531e-07	RFC2	5982	5.72246e-07	443	503	400	216	223	254
710	ENSG00000164091	496.06	-0.867405	0.153442	-5.653	1.57674e-08	3.45307e-07	WDR82	80335	5.73535e-07	647	690	588	385	351	315
711	ENSG00000188015	73.226	1.55564	0.275289	5.65095	1.59567e-08	3.48926e-07	S100A3	6274	5.79546e-07	39	43	30	120	114	93
712	ENSG00000185480	57.0403	-2.06655	0.365714	-5.65072	1.59776e-08	3.48926e-07	PARPBP	55010	5.79546e-07	109	98	74	21	30	10
713	ENSG00000164109	104.078	-1.58831	0.281278	-5.64676	1.63501e-08	3.5656e-07	MAD2L1	4085	5.92226e-07	165	185	125	56	65	30
714	ENSG00000100867	142.653	-1.38593	0.245589	-5.6433	1.66821e-08	3.63292e-07	DHRS2	10202	6.03407e-07	165	225	224	65	69	108
715	ENSG00000106400	676.493	0.999429	0.177152	5.64165	1.68425e-08	3.66272e-07	ZNHIT1	10467	6.08357e-07	431	395	522	924	701	1085
716	ENSG00000205403	63.8191	1.76535	0.312977	5.6405	1.69559e-08	3.68223e-07	CFI	3426	6.11597e-07	29	19	38	112	82	103
717	ENSG00000279806	218.317	1.11522	0.198103	5.62948	1.8075e-08	3.91978e-07	RP11-58O9.2	NA	6.51053e-07	155	147	111	251	318	327
718	ENSG00000243137	13.8909	5.02249	0.89241	5.62801	1.82298e-08	3.94785e-07	PSG4	5672	6.55716e-07	0	1	1	19	31	30
719	ENSG00000130768	45.4082	1.89554	0.336895	5.6265	1.83905e-08	3.9771e-07	SMPDL3B	27293	6.60573e-07	15	19	23	77	63	76
720	ENSG00000240652	55.4047	1.77521	0.315549	5.62577	1.84684e-08	3.9884e-07	RP11-832N8.1	NA	6.62451e-07	22	23	30	105	70	83
721	ENSG00000159348	164.736	1.07798	0.191738	5.62216	1.88586e-08	4.06702e-07	CYB5R1	51706	6.75509e-07	105	105	106	234	209	229
722	ENSG00000140264	1646.95	0.920486	0.163796	5.6197	1.91284e-08	4.11949e-07	SERF2	10169	6.84224e-07	1018	1083	1311	2405	1670	2395
723	ENSG00000109881	138.253	-1.40988	0.250934	-5.61855	1.9257e-08	4.14145e-07	CCDC34	91057	6.87871e-07	209	177	223	82	95	43
724	ENSG00000161547	427.26	-0.954087	0.16988	-5.61624	1.9516e-08	4.19135e-07	SRSF2	693221	6.96159e-07	567	634	496	305	320	242
725	ENSG00000101003	199.121	-1.39826	0.249175	-5.61156	2.00511e-08	4.30034e-07	GINS1	9837	7.14262e-07	319	365	183	112	113	103
726	ENSG00000251257	14.377	4.76005	0.848493	5.61001	2.02318e-08	4.33312e-07	CTD-2263F21.1	NA	7.19707e-07	1	1	2	44	27	13
727	ENSG00000129351	1287.94	-0.779428	0.138988	-5.60787	2.04826e-08	4.38081e-07	ILF3	3609	7.27627e-07	1655	1802	1427	874	995	975
728	ENSG00000124789	241.889	-1.13896	0.203189	-5.60541	2.07757e-08	4.43739e-07	NUP153	9972	7.37025e-07	375	363	264	150	168	131
729	ENSG00000187735	765.844	-0.877415	0.156552	-5.60461	2.08728e-08	4.452e-07	TCEA1	6917	7.39451e-07	1012	981	993	508	653	448
730	ENSG00000213853	222.456	-1.10381	0.197038	-5.60202	2.11863e-08	4.51269e-07	EMP2	2013	7.49532e-07	334	302	275	173	128	123
731	ENSG00000168209	211.7	-1.24037	0.221461	-5.60083	2.13325e-08	4.53532e-07	DDIT4	54541	7.53291e-07	227	286	380	131	125	121
732	ENSG00000130203	33.5664	2.63438	0.470367	5.60068	2.13509e-08	4.53532e-07	APOE	348	7.53291e-07	5	11	13	28	60	86
733	ENSG00000250479	1413.09	0.849836	0.151758	5.59993	2.14443e-08	4.54895e-07	CHCHD10	400916	7.55554e-07	939	1061	1020	2013	1443	2002
734	ENSG00000115875	693.974	-0.885064	0.158082	-5.59878	2.15867e-08	4.5729e-07	SRSF7	6432	7.59533e-07	828	842	1028	555	426	486
735	ENSG00000127415	54.0051	1.85694	0.331746	5.59747	2.17498e-08	4.60119e-07	IDUA	3425	7.64232e-07	27	14	29	82	82	91
736	ENSG00000072864	141.546	-1.20639	0.215585	-5.59591	2.19469e-08	4.63658e-07	NDE1	619553	7.70109e-07	195	208	193	82	94	78
737	ENSG00000131746	2474.57	0.763567	0.136479	5.59476	2.20921e-08	4.66092e-07	TNS4	84951	7.74153e-07	1842	2094	1566	2949	3166	3229
738	ENSG00000108107	9551.16	0.697543	0.124845	5.58728	2.30654e-08	4.85967e-07	RPL28	102465483	8.07164e-07	6719	7639	7495	12232	10474	12748
739	ENSG00000123485	227.685	-1.18891	0.212841	-5.5859	2.32494e-08	4.89181e-07	HJURP	55355	8.12501e-07	342	349	262	171	143	98
740	ENSG00000123066	386.771	-0.901948	0.161487	-5.58527	2.33338e-08	4.90293e-07	MED13L	23389	8.14349e-07	478	520	513	230	288	290
741	ENSG00000142453	318.996	-1.04271	0.186754	-5.58335	2.35936e-08	4.95083e-07	CARM1	10498	8.22304e-07	445	485	364	222	232	166
742	ENSG00000224858	327.447	0.990953	0.177536	5.58169	2.38188e-08	4.99137e-07	RPL29P11	NA	8.29037e-07	197	220	237	478	354	479
743	ENSG00000012822	107.68	1.50647	0.270047	5.57856	2.42523e-08	5.07536e-07	CALCOCO1	57658	8.42989e-07	43	46	78	133	150	196
744	ENSG00000163918	99.0085	-1.44004	0.258298	-5.57509	2.47397e-08	5.1704e-07	RFC4	5984	8.58775e-07	152	161	122	49	56	55
745	ENSG00000103034	52.589	1.82212	0.326969	5.57276	2.50734e-08	5.22558e-07	NDRG4	65009	8.67939e-07	19	27	23	61	80	106
746	ENSG00000084463	545.23	-0.832593	0.149406	-5.57267	2.50865e-08	5.22558e-07	WBP11	51729	8.67939e-07	693	725	684	401	431	337
747	ENSG00000175600	14.5328	4.20158	0.753978	5.57254	2.51046e-08	5.22558e-07	SUGCT	79783	8.67939e-07	1	2	2	26	19	38
748	ENSG00000133661	23.1698	2.82483	0.507259	5.56881	2.56486e-08	5.33169e-07	SFTPD	6441	8.85564e-07	5	7	5	37	28	58
749	ENSG00000170043	754.26	0.919286	0.165094	5.56825	2.57313e-08	5.34173e-07	TRAPPC1	58485	8.87231e-07	489	508	562	1006	776	1184
750	ENSG00000105373	2513.72	0.990023	0.177809	5.56789	2.57838e-08	5.34239e-07	GLTSCR2	29997	8.87341e-07	1484	1580	1981	3373	2484	4181
751	ENSG00000103495	148.944	-1.31252	0.235736	-5.56776	2.58032e-08	5.34239e-07	MAZ	4150	8.87341e-07	235	240	164	94	90	71
752	ENSG00000075702	128.743	-1.55617	0.279705	-5.5636	2.64272e-08	5.46432e-07	WDR62	284403	9.07592e-07	193	257	125	72	60	65
753	ENSG00000072042	927.169	0.698942	0.125652	5.56253	2.65896e-08	5.4906e-07	RDH11	51109	9.11958e-07	706	685	731	1142	1175	1123
754	ENSG00000185043	976.048	0.787021	0.141516	5.56137	2.67671e-08	5.51991e-07	CIB1	10519	9.16826e-07	733	675	735	1258	1065	1390
755	ENSG00000074416	1299.37	0.692256	0.124519	5.55945	2.70634e-08	5.57362e-07	MGLL	11343	9.25747e-07	975	1029	977	1491	1699	1624
756	ENSG00000075856	315.56	-0.949617	0.170833	-5.55874	2.71725e-08	5.58869e-07	SART3	9733	9.2825e-07	397	453	393	215	194	242
757	ENSG00000242732	43.561	2.1096	0.380149	5.54939	2.8667e-08	5.88828e-07	RGAG4	340526	9.7801e-07	25	11	13	63	65	86
758	ENSG00000136518	221.012	-1.14237	0.205907	-5.54799	2.88979e-08	5.92788e-07	ACTL6A	86	9.84588e-07	290	319	311	157	159	91
759	ENSG00000165376	541.136	1.16567	0.210332	5.54207	2.98924e-08	6.12382e-07	CLDN2	9075	1.01713e-06	422	268	309	985	567	695
760	ENSG00000168883	555.962	-0.799153	0.14428	-5.53891	3.04366e-08	6.22709e-07	USP39	10713	1.03428e-06	705	711	698	401	374	448
761	ENSG00000147509	77.5812	1.46828	0.265132	5.53792	3.06079e-08	6.25392e-07	RGS20	8601	1.03874e-06	47	36	40	108	104	131
762	ENSG00000121621	105.199	-1.52275	0.275006	-5.53715	3.07433e-08	6.26558e-07	KIF18A	81930	1.04068e-06	171	171	133	52	72	33
763	ENSG00000167105	165.04	1.20509	0.217637	5.53714	3.07456e-08	6.26558e-07	TMEM92	162461	1.04068e-06	120	87	90	239	190	264
764	ENSG00000183648	625.069	0.949948	0.171658	5.53395	3.131e-08	6.37224e-07	NDUFB1	4707	1.05839e-06	400	381	496	987	680	806
765	ENSG00000104953	41.8125	2.03584	0.367915	5.53345	3.13993e-08	6.38206e-07	TLE6	79816	1.06002e-06	18	15	15	72	46	86
766	ENSG00000123975	312.55	-0.947845	0.171436	-5.52887	3.22299e-08	6.54233e-07	CKS2	1164	1.08664e-06	433	396	405	249	195	196
767	ENSG00000111665	161.662	-1.34285	0.242983	-5.52651	3.26658e-08	6.62218e-07	CDCA3	83461	1.09991e-06	246	277	171	110	76	91
768	ENSG00000155366	1148.51	0.79456	0.14379	5.52585	3.27893e-08	6.63855e-07	RHOC	389	1.10263e-06	849	839	826	1537	1206	1634
769	ENSG00000138778	73.0621	-1.62582	0.294413	-5.52224	3.34708e-08	6.76771e-07	CENPE	1062	1.12408e-06	107	115	111	28	44	33
770	ENSG00000160194	427.602	0.980175	0.177548	5.52061	3.37829e-08	6.82196e-07	NDUFV3	4731	1.13309e-06	274	249	336	562	475	670
771	ENSG00000106366	527.042	2.7996	0.507371	5.51785	3.4317e-08	6.92082e-07	SERPINE1	5054	1.14951e-06	80	207	111	556	1184	1025
772	ENSG00000152518	344.239	-0.940618	0.170496	-5.51693	3.44964e-08	6.94799e-07	ZFP36L2	678	1.15402e-06	450	466	449	242	269	189
773	ENSG00000227097	318.989	0.932336	0.169023	5.51604	3.46725e-08	6.97441e-07	RPS28P7	NA	1.15841e-06	209	222	223	396	370	494
774	ENSG00000100577	317.981	1.0204	0.185072	5.51353	3.51708e-08	7.06552e-07	GSTZ1	2954	1.17354e-06	194	204	228	455	331	496
775	ENSG00000144713	10506.7	0.887206	0.160947	5.51243	3.53915e-08	7.10067e-07	RPL32	6161	1.17938e-06	6784	6817	8516	15235	10398	15289
776	ENSG00000186591	741.828	0.880933	0.159881	5.50994	3.58954e-08	7.1925e-07	UBE2H	7328	1.19463e-06	541	449	580	842	1124	914
777	ENSG00000140534	105.432	-1.67861	0.304769	-5.5078	3.63336e-08	7.27093e-07	TICRR	90381	1.20766e-06	175	205	107	54	62	30
778	ENSG00000058085	234.75	1.17122	0.212743	5.50534	3.68464e-08	7.36407e-07	LAMC2	3918	1.22313e-06	123	169	142	235	386	353
779	ENSG00000227615	211.604	1.15915	0.210633	5.50318	3.72993e-08	7.44502e-07	RP11-864N7.2	NA	1.23658e-06	119	155	116	335	225	320
780	ENSG00000133142	541.927	1.09093	0.198488	5.49622	3.88025e-08	7.73513e-07	TCEAL4	79921	1.28476e-06	283	316	436	727	573	917
781	ENSG00000255198	146.111	1.26971	0.23132	5.48897	4.04288e-08	8.04901e-07	SNHG9	NA	1.3369e-06	81	90	83	248	148	227
782	ENSG00000151491	336.362	-0.905032	0.165029	-5.48408	4.15624e-08	8.26411e-07	EPS8	2059	1.37262e-06	436	403	480	232	246	222
783	ENSG00000109606	593.516	-1.06347	0.194036	-5.4808	4.23406e-08	8.4081e-07	DHX15	1665	1.39654e-06	916	846	656	396	475	272
784	ENSG00000094804	346.354	-1.10839	0.202356	-5.47741	4.31587e-08	8.55962e-07	CDC6	990	1.4217e-06	481	580	364	227	250	176
785	ENSG00000107438	966.908	0.692453	0.126518	5.47314	4.42123e-08	8.75741e-07	PDLIM1	9124	1.45456e-06	736	717	763	1170	1154	1262
786	ENSG00000085840	116.096	-1.60574	0.293442	-5.47209	4.44771e-08	8.79865e-07	ORC1	4998	1.46141e-06	187	226	109	52	52	71
787	ENSG00000103363	1363.04	0.849779	0.155316	5.47129	4.46766e-08	8.82689e-07	TCEB2	6923	1.4661e-06	975	893	1045	1877	1384	2005
788	ENSG00000178980	1294.29	1.01351	0.185256	5.47088	4.47818e-08	8.83644e-07	SEPW1	6415	1.46768e-06	849	1093	627	1898	1442	1856
789	ENSG00000173486	666.888	1.03595	0.18945	5.4682	4.54619e-08	8.95928e-07	FKBP2	2286	1.48809e-06	452	405	449	874	643	1179
790	ENSG00000070018	197.985	-1.06903	0.195554	-5.46668	4.58533e-08	9.02498e-07	LRP6	4040	1.499e-06	295	251	261	138	134	108
791	ENSG00000141867	445.61	-0.81171	0.148522	-5.46526	4.62225e-08	9.08613e-07	BRD4	23476	1.50915e-06	557	593	555	335	329	305
792	ENSG00000169020	443.789	1.19356	0.218589	5.46032	4.75264e-08	9.33066e-07	ATP5I	521	1.54977e-06	288	223	295	696	391	771
793	ENSG00000198918	7793.37	0.8441	0.154681	5.45703	4.84165e-08	9.49342e-07	RPL39	6170	1.5768e-06	4989	5003	6737	11784	9181	9066
794	ENSG00000218739	209.962	0.980219	0.179667	5.45577	4.87613e-08	9.54898e-07	CEBPZOS	100505876	1.58603e-06	140	137	148	251	295	290
795	ENSG00000127831	651.996	0.951854	0.174577	5.45236	4.97056e-08	9.71535e-07	VIL1	7429	1.61366e-06	572	375	385	809	886	884
796	ENSG00000234741	562.153	0.985404	0.180733	5.45225	4.97358e-08	9.71535e-07	GAS5	60674	1.61366e-06	312	348	469	806	622	816
797	ENSG00000125995	669.771	1.08242	0.19856	5.45133	4.99939e-08	9.75351e-07	ROMO1	140823	1.62e-06	398	417	470	1066	596	1073
798	ENSG00000185591	351.191	-0.937234	0.172009	-5.44874	5.07278e-08	9.87497e-07	SP1	6667	1.64018e-06	498	442	451	222	283	212
799	ENSG00000155463	1532.71	0.715125	0.131247	5.44869	5.07434e-08	9.87497e-07	OXA1L	5018	1.64018e-06	1118	1087	1272	1901	1752	2065
800	ENSG00000142731	48.1336	-2.00058	0.36724	-5.4476	5.10528e-08	9.91164e-07	PLK4	10733	1.64627e-06	81	83	69	14	24	18
801	ENSG00000127946	227.928	-1.0502	0.192783	-5.44758	5.10594e-08	9.91164e-07	HIP1	3092	1.64627e-06	279	358	284	145	142	161
802	ENSG00000100393	403.051	-0.887541	0.163044	-5.44357	5.2224e-08	1.01251e-06	EP300	100302237	1.68172e-06	553	543	480	269	320	254
803	ENSG00000243566	488.528	1.00843	0.185271	5.44298	5.23963e-08	1.01419e-06	UPK3B	105375355	1.68451e-06	326	383	263	509	709	740
804	ENSG00000064687	146.49	1.13978	0.20941	5.44283	5.24412e-08	1.01419e-06	ABCA7	10347	1.68451e-06	91	82	100	187	185	234
805	ENSG00000129534	85.9304	-1.55398	0.285727	-5.43868	5.36774e-08	1.03651e-06	MIS18BP1	55320	1.72159e-06	144	126	119	38	57	30
806	ENSG00000205220	46.0707	1.87326	0.344444	5.43851	5.37287e-08	1.03651e-06	PSMB10	5699	1.72159e-06	20	19	19	63	57	98
807	ENSG00000205609	4591.62	-0.624622	0.114893	-5.43654	5.43261e-08	1.04674e-06	EIF3CL	728689	1.73857e-06	5562	5594	5551	3837	3352	3654
808	ENSG00000166136	256.822	1.25069	0.230212	5.43277	5.54873e-08	1.06779e-06	NDUFB8	4714	1.77353e-06	126	144	182	396	239	453
809	ENSG00000054148	1037.53	0.887636	0.163451	5.4306	5.6165e-08	1.07949e-06	PHPT1	29085	1.79298e-06	702	685	792	1498	1029	1519
810	ENSG00000276043	145.068	-1.53299	0.282376	-5.42889	5.67044e-08	1.08852e-06	UHRF1	29128	1.80796e-06	192	306	146	63	68	96
811	ENSG00000176410	123.263	1.2231	0.225309	5.42855	5.68133e-08	1.08926e-06	DNAJC30	84277	1.8092e-06	78	66	77	206	151	161
812	ENSG00000137492	187.923	-1.30958	0.241257	-5.42816	5.69383e-08	1.09031e-06	THAP12	5612	1.81095e-06	301	264	246	82	153	81
813	ENSG00000083444	883.54	0.706012	0.130108	5.42636	5.75154e-08	1.10001e-06	PLOD1	5351	1.82705e-06	683	667	661	1073	1031	1186
814	ENSG00000136451	201.017	-1.05378	0.194212	-5.42592	5.76579e-08	1.10138e-06	VEZF1	7716	1.82933e-06	284	278	256	140	142	106
815	ENSG00000177954	8259.78	0.904944	0.166856	5.4235	5.84416e-08	1.11498e-06	RPS27	6232	1.85192e-06	5276	5484	6487	12134	7852	12325
816	ENSG00000134333	14229.3	-0.774974	0.14295	-5.42129	5.9169e-08	1.12747e-06	LDHA	3939	1.87267e-06	20339	16536	17015	12111	10507	8867
817	ENSG00000101986	63.336	1.56533	0.288775	5.42057	5.94085e-08	1.13065e-06	ABCD1	215	1.87795e-06	35	26	34	92	84	108
818	ENSG00000184110	4651.78	-0.623636	0.115297	-5.40896	6.33918e-08	1.20411e-06	EIF3C	728689	1.99997e-06	5635	5655	5632	3902	3388	3700
819	ENSG00000158109	252.375	1.01598	0.187835	5.40887	6.34234e-08	1.20411e-06	TPRG1L	127262	1.99997e-06	185	185	132	347	353	312
820	ENSG00000150779	464.834	1.02093	0.188765	5.40846	6.35696e-08	1.20542e-06	TIMM8B	26521	2.00213e-06	277	311	329	748	449	675
821	ENSG00000124107	937.645	1.04415	0.193193	5.40471	6.49139e-08	1.22941e-06	SLPI	6590	2.04198e-06	556	511	766	1388	921	1483
822	ENSG00000138031	112.348	-1.39982	0.259182	-5.40091	6.63023e-08	1.25418e-06	ADCY3	109	2.08312e-06	173	188	128	75	59	50
823	ENSG00000205277	20.2153	2.83801	0.525621	5.39934	6.68868e-08	1.2637e-06	MUC12	10071	2.09893e-06	6	3	5	28	36	43
824	ENSG00000146066	1084.76	0.8152	0.151023	5.39784	6.74472e-08	1.27274e-06	HIGD2A	192286	2.11395e-06	770	709	875	1509	1152	1493
825	ENSG00000074410	2861.96	0.668965	0.123988	5.3954	6.83696e-08	1.28858e-06	CA12	771	2.14026e-06	2175	2189	2263	3884	3164	3496
826	ENSG00000149636	113.057	-1.43078	0.265199	-5.3951	6.84855e-08	1.2892e-06	DSN1	79980	2.14129e-06	183	188	127	51	74	55
827	ENSG00000244405	148.746	-1.13387	0.210288	-5.39199	6.96816e-08	1.31013e-06	ETV5	2119	2.17606e-06	199	207	210	89	102	86
828	ENSG00000202538	18.836	4.05078	0.751294	5.39174	6.97795e-08	1.31039e-06	RNU4-2	26834	2.17648e-06	1	4	2	56	8	43
829	ENSG00000092148	551.482	-0.866703	0.160947	-5.38503	7.24319e-08	1.35856e-06	HECTD1	25831	2.25649e-06	776	662	708	377	457	330
830	ENSG00000071859	832.541	0.850891	0.158085	5.38249	7.34619e-08	1.37622e-06	FAM50A	9130	2.28582e-06	564	577	634	1074	868	1277
831	ENSG00000019186	929.877	-0.867893	0.161279	-5.38133	7.39394e-08	1.38349e-06	CYP24A1	1591	2.2979e-06	1008	1113	1481	666	640	670
832	ENSG00000205213	592.95	-0.912953	0.169666	-5.38088	7.4122e-08	1.38492e-06	LGR4	55366	2.30027e-06	872	683	778	401	489	335
833	ENSG00000126261	969.394	-0.775827	0.144187	-5.38071	7.41936e-08	1.38492e-06	UBA2	10054	2.30027e-06	1232	1220	1228	801	753	584
834	ENSG00000163655	693.301	-0.945646	0.1759	-5.37606	7.61341e-08	1.41944e-06	GMPS	8833	2.3576e-06	971	923	853	548	535	330
835	ENSG00000149257	669.658	0.829585	0.154329	5.37544	7.63976e-08	1.42264e-06	SERPINH1	871	2.36293e-06	481	547	415	886	764	924
836	ENSG00000108312	588.683	-0.833666	0.155191	-5.37187	7.79264e-08	1.44937e-06	UBTF	7343	2.40733e-06	749	809	697	448	360	468
837	ENSG00000100418	829.143	0.767461	0.143111	5.36269	8.19917e-08	1.52317e-06	DESI1	27351	2.52989e-06	602	554	685	1149	987	997
838	ENSG00000042493	317.148	1.07069	0.19967	5.36229	8.21712e-08	1.52468e-06	CAPG	822	2.5324e-06	217	164	229	462	327	504
839	ENSG00000077514	86.7014	-1.54838	0.288797	-5.36147	8.25476e-08	1.52984e-06	POLD3	10714	2.54097e-06	129	155	108	40	56	33
840	ENSG00000106105	2387.73	-0.981344	0.183099	-5.35964	8.33861e-08	1.54265e-06	GARS	2617	2.56225e-06	2493	2673	4346	1587	1683	1544
841	ENSG00000112118	631.224	-0.978329	0.18254	-5.35953	8.34372e-08	1.54265e-06	MCM3	4172	2.56225e-06	852	995	659	464	347	471
842	ENSG00000178921	476.246	-0.942569	0.17597	-5.35641	8.48912e-08	1.56766e-06	PFAS	5198	2.6038e-06	665	719	492	317	306	358
843	ENSG00000253802	390.389	0.90562	0.169258	5.35053	8.76959e-08	1.61754e-06	CTA-392C11.1	NA	2.68664e-06	240	250	324	508	472	549
844	ENSG00000119655	373.912	0.91182	0.170577	5.3455	9.01675e-08	1.66116e-06	NPC2	100616211	2.75908e-06	226	239	313	508	471	486
845	ENSG00000079385	121.733	1.36579	0.255673	5.34192	9.19648e-08	1.69226e-06	CEACAM1	634	2.81075e-06	82	43	80	185	170	171
846	ENSG00000173744	520.534	-0.956176	0.179043	-5.34049	9.26967e-08	1.70371e-06	AGFG1	3267	2.82977e-06	736	692	643	344	443	264
847	ENSG00000162813	210.564	0.945543	0.177068	5.34001	9.29408e-08	1.70618e-06	BPNT1	10380	2.83387e-06	139	149	144	260	282	290
848	ENSG00000105404	218.338	1.00679	0.188559	5.33936	9.3273e-08	1.71026e-06	RABAC1	10567	2.84065e-06	140	135	158	288	250	340
849	ENSG00000167378	133.942	1.20484	0.225694	5.33837	9.37861e-08	1.71764e-06	IRGQ	126298	2.85291e-06	82	90	70	157	174	232
850	ENSG00000158604	432.14	0.805751	0.150962	5.33744	9.42676e-08	1.72443e-06	TMED4	222068	2.86418e-06	295	341	309	576	568	504
851	ENSG00000236552	433.109	1.31716	0.246792	5.33712	9.44359e-08	1.72548e-06	RPL13AP5	728658	2.86592e-06	211	266	263	743	327	788
852	ENSG00000090615	333.588	0.821058	0.153957	5.33302	9.65924e-08	1.76281e-06	GOLGA3	2802	2.92793e-06	244	236	242	433	409	438
853	ENSG00000005238	121.724	1.18064	0.221425	5.33201	9.71339e-08	1.77062e-06	FAM214B	80256	2.94089e-06	80	81	62	160	166	181
854	ENSG00000101868	165.156	-1.3221	0.247978	-5.33153	9.73912e-08	1.77323e-06	POLA1	5422	2.94523e-06	262	259	192	122	103	53
855	ENSG00000089327	515.703	0.905114	0.169795	5.33061	9.78826e-08	1.77731e-06	FXYD5	53827	2.952e-06	333	348	393	570	615	836
856	ENSG00000149929	118.957	-1.2933	0.242621	-5.33053	9.79249e-08	1.77731e-06	HIRIP3	8479	2.952e-06	156	181	164	72	55	86
857	ENSG00000101945	153.099	-1.35083	0.253416	-5.33047	9.79582e-08	1.77731e-06	SUV39H1	6839	2.952e-06	247	264	151	75	99	83
858	ENSG00000186660	310.278	-0.957522	0.179692	-5.3287	9.89183e-08	1.79263e-06	ZFP91	80829	2.97746e-06	411	419	407	202	254	169
859	ENSG00000100242	111.527	-1.38376	0.259698	-5.32837	9.90986e-08	1.79381e-06	SUN2	25777	2.97942e-06	164	189	135	65	73	43
860	ENSG00000080345	140.675	-1.30759	0.245473	-5.32683	9.994e-08	1.80694e-06	RIF1	55183	3.00122e-06	218	207	181	56	107	76
861	ENSG00000150540	74.6992	1.53696	0.288559	5.32633	1.00215e-07	1.80981e-06	HNMT	3176	3.00599e-06	29	35	50	117	91	126
862	ENSG00000128915	240.674	-1.06512	0.200087	-5.3233	1.01901e-07	1.83812e-06	ICE2	79664	3.05301e-06	351	307	326	133	196	131
863	ENSG00000164342	23.8996	2.522	0.473928	5.3215	1.02918e-07	1.85431e-06	TLR3	7098	3.0799e-06	9	6	7	30	52	40
864	ENSG00000112306	7309.79	0.767988	0.144622	5.31031	1.09441e-07	1.96956e-06	RPS12	6206	3.27133e-06	5273	5373	5574	9947	7261	10431
865	ENSG00000160221	386.551	0.923649	0.173953	5.30977	1.09766e-07	1.97313e-06	C21orf33	102724023	3.27725e-06	279	259	260	605	408	509
866	ENSG00000148229	315.901	-0.94211	0.177444	-5.30935	1.10018e-07	1.97536e-06	POLE3	54107	3.28097e-06	409	459	385	216	247	179
867	ENSG00000104419	166.833	-1.08535	0.204516	-5.3069	1.11508e-07	1.99981e-06	NDRG1	10397	3.32157e-06	227	214	238	92	107	123
868	ENSG00000279088	61.3572	1.53282	0.289015	5.30358	1.13552e-07	2.03412e-06	RP11-574K11.24	NA	3.37856e-06	31	33	30	105	79	91
869	ENSG00000200795	14.9948	4.02894	0.759971	5.30144	1.14895e-07	2.05378e-06	RNU4-1	26835	3.41121e-06	1	3	1	26	13	45
870	ENSG00000006282	421.861	0.867002	0.163542	5.30141	1.14913e-07	2.05378e-06	SPATA20	64847	3.41121e-06	299	286	307	563	452	625
871	ENSG00000186871	78.9419	-1.87663	0.354038	-5.30064	1.15397e-07	2.06006e-06	ERCC6L	54821	3.42165e-06	137	154	87	31	51	13
872	ENSG00000078401	267.294	1.04389	0.196981	5.29942	1.16169e-07	2.07146e-06	EDN1	1906	3.44058e-06	136	184	202	335	322	426
873	ENSG00000121957	67.8351	-1.8492	0.349211	-5.29537	1.18774e-07	2.11548e-06	GPSM2	29899	3.51368e-06	121	100	104	23	47	13
874	ENSG00000171174	112.265	1.17612	0.222148	5.29433	1.19456e-07	2.12519e-06	RBKS	64080	3.52982e-06	66	72	69	173	151	144
875	ENSG00000197343	229.886	0.972982	0.183796	5.29383	1.1978e-07	2.12852e-06	ZNF655	79027	3.53535e-06	159	167	142	276	351	285
876	ENSG00000131981	517.502	0.867776	0.163951	5.2929	1.20392e-07	2.13696e-06	LGALS3	3958	3.54937e-06	342	336	425	727	716	559
877	ENSG00000134308	2047.27	-0.870642	0.164507	-5.29243	1.20702e-07	2.14002e-06	YWHAQ	10971	3.55444e-06	2855	2720	2377	1533	1723	1075
878	ENSG00000072210	1234.51	-0.668719	0.12653	-5.28507	1.25656e-07	2.22531e-06	ALDH3A2	224	3.69611e-06	1535	1415	1597	914	974	972
879	ENSG00000259772	41.6016	1.87059	0.353998	5.2842	1.26257e-07	2.23341e-06	RP11-16E12.2	NA	3.70957e-06	17	13	23	61	65	71
880	ENSG00000175416	764.642	0.748987	0.141756	5.28361	1.2666e-07	2.23799e-06	CLTB	1212	3.71717e-06	573	574	560	987	831	1063
881	ENSG00000181649	257.882	1.04502	0.198025	5.27723	1.31153e-07	2.31476e-06	PHLDA2	7262	3.84468e-06	146	218	141	344	356	343
882	ENSG00000175868	26.2726	-2.96838	0.56262	-5.27598	1.32046e-07	2.32788e-06	CALCB	797	3.86647e-06	46	44	49	12	4	3
883	ENSG00000070061	230.977	-0.993184	0.188501	-5.26887	1.37269e-07	2.41721e-06	IKBKAP	8518	4.01485e-06	339	313	273	147	170	144
884	ENSG00000135919	109.979	1.30008	0.247038	5.26266	1.4199e-07	2.49751e-06	SERPINE2	5270	4.14822e-06	61	78	53	136	188	144
885	ENSG00000134222	55.7578	-1.74089	0.331018	-5.25922	1.4467e-07	2.54178e-06	PSRC1	84722	4.22175e-06	88	93	76	23	25	30
886	ENSG00000116560	1357.94	-0.689767	0.131229	-5.25619	1.47067e-07	2.58098e-06	SFPQ	6421	4.28685e-06	1690	1807	1528	1003	999	1121
887	ENSG00000123080	148.275	-1.27803	0.243164	-5.25583	1.47357e-07	2.58315e-06	CDKN2C	1031	4.29046e-06	238	207	184	120	68	73
888	ENSG00000184990	282.208	-0.970879	0.18484	-5.25254	1.50016e-07	2.62679e-06	SIVA1	10572	4.36296e-06	355	429	335	216	169	189
889	ENSG00000141030	620.5	-0.807902	0.153927	-5.2486	1.53256e-07	2.68051e-06	COPS3	8533	4.45217e-06	740	799	839	429	523	393
890	ENSG00000105327	72.6172	1.71762	0.327626	5.24262	1.58313e-07	2.76585e-06	BBC3	100422832	4.59392e-06	28	24	48	94	85	156
891	ENSG00000153879	418.009	-1.14966	0.21945	-5.23883	1.61595e-07	2.82003e-06	CEBPG	1054	4.68391e-06	444	474	814	286	264	227
892	ENSG00000198223	34.3825	2.14542	0.409578	5.23812	1.62224e-07	2.82782e-06	CSF2RA	1438	4.69684e-06	15	6	17	56	62	50
893	ENSG00000155363	216.543	0.993533	0.18972	5.23685	1.63344e-07	2.84415e-06	MOV10	4343	4.72398e-06	144	156	131	279	249	340
894	ENSG00000026297	69.4989	1.60978	0.307565	5.23393	1.65944e-07	2.88619e-06	RNASET2	8635	4.7938e-06	35	30	35	99	71	146
895	ENSG00000111331	833.44	-0.927391	0.177254	-5.23201	1.67681e-07	2.91315e-06	OAS3	4940	4.83858e-06	1255	1216	809	635	575	511
896	ENSG00000167889	202.694	-1.12524	0.215078	-5.2318	1.6787e-07	2.91319e-06	MGAT5B	146664	4.83864e-06	266	316	246	150	97	141
897	ENSG00000104783	197.515	1.10665	0.211764	5.22585	1.73353e-07	3.00498e-06	KCNN4	3783	4.9911e-06	122	119	131	222	231	360
898	ENSG00000160213	1326.51	0.794832	0.152116	5.22519	1.73981e-07	3.0125e-06	CSTB	1476	5.00359e-06	1004	883	1017	1835	1348	1871
899	ENSG00000170421	87206.5	0.692576	0.132625	5.22205	1.76954e-07	3.06057e-06	KRT8	3856	5.08343e-06	69252	73882	56864	109666	98246	115329
900	ENSG00000188505	38.0875	1.93911	0.371452	5.22035	1.78583e-07	3.08532e-06	NCCRP1	342897	5.12454e-06	17	14	16	58	47	78
901	ENSG00000167566	131.81	1.13255	0.217024	5.21853	1.80348e-07	3.11235e-06	NCKAP5L	57701	5.16944e-06	81	87	78	155	173	217
902	ENSG00000100292	1321.22	0.706133	0.135496	5.21146	1.87357e-07	3.22972e-06	HMOX1	3162	5.36439e-06	1080	1043	888	1783	1532	1602
903	ENSG00000223551	90.4506	1.28982	0.2476	5.20927	1.89583e-07	3.26449e-06	TMSB4XP4	NA	5.42212e-06	48	62	48	120	129	136
904	ENSG00000126216	128.155	-1.17198	0.225207	-5.204	1.95045e-07	3.35482e-06	TUBGCP3	10426	5.57216e-06	188	177	170	70	89	76
905	ENSG00000115159	254.396	-1.12465	0.21613	-5.20356	1.95504e-07	3.35899e-06	GPD2	2820	5.57909e-06	385	367	303	140	213	118
906	ENSG00000182752	177.723	1.03828	0.199577	5.20242	1.96713e-07	3.37603e-06	PAPPA	5069	5.6074e-06	127	103	121	208	271	237
907	ENSG00000145022	286.009	0.974876	0.187428	5.20133	1.97865e-07	3.39207e-06	TCTA	6988	5.63403e-06	208	161	209	452	331	355
908	ENSG00000076248	287.857	-1.03407	0.198848	-5.20033	1.98939e-07	3.40671e-06	UNG	7374	5.65836e-06	393	469	297	178	193	196
909	ENSG00000093010	548.316	0.810476	0.155875	5.19952	1.99804e-07	3.41777e-06	COMT	100616414	5.67672e-06	357	444	392	635	665	798
910	ENSG00000228205	44.5693	2.58652	0.49752	5.19882	2.00555e-07	3.42684e-06	RP11-778D9.4	NA	5.69179e-06	13	13	11	66	21	144
911	ENSG00000174780	736.727	-0.795285	0.153021	-5.19724	2.02265e-07	3.45227e-06	SRP72	6731	5.73403e-06	994	914	906	525	631	451
912	ENSG00000151725	96.437	-1.50265	0.289208	-5.19573	2.03919e-07	3.47632e-06	CENPU	79682	5.77397e-06	142	142	150	40	73	30
913	ENSG00000107625	202.899	-0.966869	0.186098	-5.19548	2.04194e-07	3.47632e-06	DDX50	79009	5.77397e-06	263	272	269	145	128	141
914	ENSG00000130723	556.265	-0.835014	0.160724	-5.19534	2.04345e-07	3.47632e-06	PRRC2B	84726	5.77397e-06	803	716	625	392	448	353
915	ENSG00000167670	193.698	-1.26707	0.24395	-5.19396	2.05864e-07	3.49834e-06	CHAF1A	10036	5.81055e-06	304	335	184	134	110	96
916	ENSG00000142871	148.564	1.14973	0.221374	5.19362	2.06239e-07	3.50088e-06	CYR61	3491	5.81476e-06	83	117	77	190	215	209
917	ENSG00000197746	3106.99	0.619511	0.119298	5.19296	2.06979e-07	3.50962e-06	PSAP	5660	5.82928e-06	2420	2550	2377	3521	3681	4092
918	ENSG00000127561	191.476	0.990001	0.190742	5.19028	2.09983e-07	3.55668e-06	SYNGR3	9143	5.90744e-06	127	136	120	277	220	269
919	ENSG00000148303	9520.21	0.746792	0.143938	5.18828	2.12243e-07	3.59104e-06	RPL7A	6130	5.96452e-06	6766	7278	7279	13008	9438	13353
920	ENSG00000115365	560.848	-0.950423	0.183231	-5.18701	2.13695e-07	3.61168e-06	LANCL1	10314	5.99879e-06	815	638	775	399	461	277
921	ENSG00000080839	96.6855	-1.45395	0.280476	-5.18386	2.17343e-07	3.66934e-06	RBL1	5933	6.09457e-06	137	162	132	54	67	28
922	ENSG00000177666	380.065	0.77134	0.148822	5.18295	2.18402e-07	3.68323e-06	PNPLA2	57104	6.11763e-06	271	292	280	480	482	476
923	ENSG00000142192	1967.86	0.715797	0.138112	5.18272	2.18675e-07	3.68383e-06	APP	351	6.11863e-06	1493	1399	1572	2152	2338	2853
924	ENSG00000101210	521.531	0.866388	0.167183	5.18226	2.1921e-07	3.68885e-06	EEF1A2	1917	6.12696e-06	349	323	433	605	633	786
925	ENSG00000001461	165.968	1.10712	0.213806	5.17815	2.24099e-07	3.76705e-06	NIPAL3	57185	6.25686e-06	114	82	121	204	251	224
926	ENSG00000122565	804.612	-0.826932	0.159732	-5.177	2.25478e-07	3.78613e-06	CBX3	11335	6.28855e-06	1093	1016	989	504	713	514
927	ENSG00000196220	34.43	1.94354	0.375523	5.17555	2.27237e-07	3.81156e-06	SRGAP3	9901	6.33078e-06	16	12	15	51	56	58
928	ENSG00000003989	582.885	-0.834203	0.161298	-5.1718	2.31845e-07	3.88466e-06	SLC7A2	6542	6.4522e-06	810	693	745	467	452	330
929	ENSG00000128656	65.3994	-1.60339	0.310165	-5.16947	2.34758e-07	3.92924e-06	CHN1	1123	6.52623e-06	101	109	85	24	37	35
930	ENSG00000246228	65.7504	1.54723	0.29953	5.16551	2.39785e-07	4.00905e-06	CASC8	727677	6.6588e-06	32	44	24	98	89	108
931	ENSG00000101266	1229.79	-0.756821	0.146532	-5.16488	2.40596e-07	4.01829e-06	CSNK2A1	1457	6.67415e-06	1538	1634	1473	928	1055	750
932	ENSG00000170759	1014.61	-0.772966	0.149714	-5.16296	2.4308e-07	4.05285e-06	KIF5B	3799	6.73155e-06	1388	1282	1180	733	871	635
933	ENSG00000124587	180.915	0.975058	0.18886	5.16287	2.43186e-07	4.05285e-06	PEX6	5190	6.73155e-06	128	120	117	248	217	257
934	ENSG00000237668	51.4271	2.08422	0.403746	5.16221	2.44054e-07	4.06296e-06	RPS15AP38	NA	6.74834e-06	18	24	15	99	36	116
935	ENSG00000161692	57.1505	-1.77602	0.344392	-5.15696	2.50992e-07	4.17399e-06	DBF4B	80174	6.93275e-06	82	109	74	33	21	25
936	ENSG00000105669	705.844	0.750437	0.145552	5.15581	2.52534e-07	4.19515e-06	COPE	11316	6.9679e-06	515	516	543	890	767	1005
937	ENSG00000006634	113.338	-1.43805	0.27899	-5.15449	2.54327e-07	4.22042e-06	DBF4	10926	7.00988e-06	178	168	159	51	90	35
938	ENSG00000108175	388.538	-0.87498	0.169934	-5.14894	2.6196e-07	4.34244e-06	ZMIZ1	57178	7.21255e-06	466	564	484	251	316	249
939	ENSG00000084090	546.074	-0.760296	0.14769	-5.14791	2.63404e-07	4.36174e-06	STARD7	56910	7.2446e-06	705	726	633	389	438	385
940	ENSG00000120306	667.412	0.723588	0.14058	5.14717	2.64446e-07	4.37432e-06	CYSTM1	84418	7.2655e-06	478	472	560	802	826	866
941	ENSG00000099785	149.282	1.04937	0.204001	5.14396	2.69005e-07	4.44501e-06	2002-03-01	51257	7.38291e-06	92	100	99	230	183	191
942	ENSG00000071539	226.958	-1.20156	0.233746	-5.14046	2.74061e-07	4.5224e-06	TRIP13	9319	7.51145e-06	347	371	238	131	177	98
943	ENSG00000226396	24.3695	3.43313	0.667882	5.14032	2.7427e-07	4.5224e-06	RP5-1056L3.3	NA	7.51145e-06	1	6	5	47	9	78
944	ENSG00000129484	149.079	-1.07668	0.209591	-5.13708	2.79038e-07	4.59309e-06	PARP2	10038	7.62886e-06	201	200	209	98	104	83
945	ENSG00000131143	3992.16	0.791586	0.154095	5.13701	2.79148e-07	4.59309e-06	COX4I1	1327	7.62886e-06	2850	2638	3277	5580	3974	5634
946	ENSG00000177337	161.218	1.11429	0.216927	5.13671	2.79594e-07	4.59556e-06	DLGAP1-AS1	NA	7.63296e-06	86	101	117	256	180	227
947	ENSG00000119314	275.468	-0.973797	0.189584	-5.1365	2.79903e-07	4.59578e-06	PTBP3	9991	7.63334e-06	379	381	343	173	228	149
948	ENSG00000189171	286.171	1.21126	0.235856	5.13558	2.8127e-07	4.61335e-06	S100A13	6284	7.66252e-06	164	142	208	452	250	501
949	ENSG00000132341	4155.71	-0.620552	0.120857	-5.13458	2.82781e-07	4.63326e-06	RAN	5901	7.69557e-06	4858	5430	4821	3539	3181	3105
950	ENSG00000100982	258.05	-0.934377	0.181989	-5.13425	2.83272e-07	4.63641e-06	PCIF1	63935	7.70082e-06	347	328	339	208	151	176
951	ENSG00000213261	274.98	0.95083	0.185223	5.13344	2.84494e-07	4.65152e-06	EEF1B2P6	NA	7.72591e-06	175	173	217	424	362	300
952	ENSG00000139508	100.264	1.57095	0.306257	5.12953	2.90465e-07	4.74416e-06	SLC46A3	283537	7.87977e-06	58	35	62	131	219	98
953	ENSG00000115484	1717.64	-0.673719	0.131373	-5.12828	2.92407e-07	4.77087e-06	CCT4	10575	7.92414e-06	2110	2251	1980	1399	1402	1164
954	ENSG00000173221	648.243	0.877617	0.171235	5.12522	2.97189e-07	4.84088e-06	GLRX	2745	8.04043e-06	460	352	559	879	796	844
955	ENSG00000023839	1651.15	0.708187	0.138179	5.12514	2.97321e-07	4.84088e-06	ABCC2	1244	8.04043e-06	1403	1149	1213	1863	2290	1990
956	ENSG00000182004	430.203	-0.830213	0.162035	-5.12366	2.99661e-07	4.87387e-06	SNRPE	6635	8.09522e-06	559	521	579	321	347	254
957	ENSG00000139239	697.425	1.03441	0.201968	5.12164	3.02884e-07	4.92115e-06	RPL14P1	NA	8.17376e-06	393	482	492	1019	617	1181
958	ENSG00000226221	1563.38	0.729266	0.142407	5.12099	3.03935e-07	4.93308e-06	RPL26P19	NA	8.19356e-06	1112	1103	1311	2137	1668	2050
959	ENSG00000174282	406.171	0.774959	0.151399	5.11867	3.07702e-07	4.98901e-06	ZBTB4	57659	8.28646e-06	298	291	308	473	501	567
960	ENSG00000182481	2008.85	-0.889794	0.173856	-5.118	3.08791e-07	5.00145e-06	KPNA2	3838	8.30712e-06	2862	3037	1936	1418	1606	1194
961	ENSG00000109790	206.346	-1.05191	0.205589	-5.11658	3.11125e-07	5.03314e-06	KLHL5	51088	8.35976e-06	275	293	274	113	169	113
962	ENSG00000167552	2162.18	-0.760503	0.14864	-5.11642	3.11395e-07	5.03314e-06	TUBA1A	7846	8.35976e-06	2922	3067	2168	1695	1569	1551
963	ENSG00000139354	42.0824	-1.95621	0.382438	-5.1151	3.13567e-07	5.06299e-06	GAS2L3	283431	8.40934e-06	75	63	64	16	20	15
964	ENSG00000140464	181.641	0.990019	0.193564	5.11468	3.14276e-07	5.06917e-06	PML	5371	8.4196e-06	132	108	123	222	233	272
965	ENSG00000275832	522.239	0.9933	0.194223	5.11421	3.15048e-07	5.07636e-06	ARHGAP23	57636	8.43154e-06	357	432	257	567	727	793
966	ENSG00000108298	15438.8	0.803514	0.157283	5.10871	3.24368e-07	5.22112e-06	RPL19	6143	8.67197e-06	10638	10445	12652	20539	15133	23225
967	ENSG00000113448	534.142	-0.826334	0.161765	-5.10824	3.25179e-07	5.22876e-06	PDE4D	5144	8.68468e-06	694	619	743	373	447	327
968	ENSG00000117385	285.653	0.925332	0.181187	5.10705	3.27236e-07	5.25639e-06	P3H1	64175	8.73057e-06	203	203	182	349	320	458
969	ENSG00000083168	235.494	-0.946292	0.185362	-5.10512	3.30589e-07	5.30478e-06	KAT6A	7994	8.81094e-06	333	300	301	180	168	131
970	ENSG00000225383	98.9122	1.34847	0.264213	5.10374	3.33014e-07	5.33819e-06	SFTA1P	207107	8.86642e-06	46	56	64	120	116	191
971	ENSG00000224126	246.265	-0.958776	0.188131	-5.09631	3.46342e-07	5.54611e-06	UBE2SP2	NA	9.21177e-06	326	371	280	180	168	154
972	ENSG00000105246	12.9786	3.74336	0.73459	5.09584	3.4719e-07	5.55397e-06	EBI3	10148	9.22482e-06	2	3	1	16	34	23
973	ENSG00000188483	190.046	-1.03721	0.203579	-5.09486	3.49002e-07	5.57721e-06	IER5L	389792	9.26343e-06	215	269	280	122	116	139
974	ENSG00000139726	512.938	-0.953136	0.187121	-5.09369	3.51156e-07	5.60587e-06	DENR	8562	9.31103e-06	703	683	655	338	452	247
975	ENSG00000084207	8142.03	0.682877	0.134137	5.0909	3.56372e-07	5.68331e-06	GSTP1	2950	9.43965e-06	6196	6285	6262	10706	8281	11121
976	ENSG00000180185	375.127	0.795873	0.156491	5.08576	3.66166e-07	5.83351e-06	FAHD1	81889	9.68913e-06	274	257	293	516	482	428
977	ENSG00000171560	6988.72	0.95837	0.188468	5.08506	3.67501e-07	5.8488e-06	FGA	2243	9.71452e-06	4819	3226	6201	9642	8002	10043
978	ENSG00000213178	2116.91	0.750199	0.147558	5.0841	3.69374e-07	5.87259e-06	RP11-641D5.1	NA	9.75404e-06	1486	1471	1773	2698	2218	3055
979	ENSG00000177556	307.765	0.830603	0.163389	5.08359	3.70359e-07	5.88224e-06	ATOX1	475	9.77007e-06	227	215	220	429	352	403
980	ENSG00000138668	1283.05	-0.647813	0.127453	-5.08277	3.71977e-07	5.90191e-06	HNRNPD	3184	9.80273e-06	1531	1604	1562	1088	926	987
981	ENSG00000206527	412.34	-1.01362	0.199532	-5.08001	3.7742e-07	5.98217e-06	HACD2	201562	9.93604e-06	622	495	549	242	363	204
982	ENSG00000135778	482.048	0.900895	0.177407	5.07812	3.81185e-07	6.03569e-06	NTPCR	84284	1.00249e-05	300	337	367	710	480	698
983	ENSG00000114270	155.03	1.37149	0.270107	5.07759	3.82244e-07	6.0463e-06	COL7A1	100313843	1.00426e-05	77	124	57	174	213	285
984	ENSG00000112029	44.9633	-2.01094	0.396333	-5.07385	3.89842e-07	6.15609e-06	FBXO5	26271	1.02249e-05	85	73	61	23	22	5
985	ENSG00000153187	4101.34	-0.565009	0.111358	-5.07379	3.89977e-07	6.15609e-06	HNRNPU	3192	1.02249e-05	4842	4779	5064	3267	3402	3254
986	ENSG00000053747	153.954	1.07843	0.212912	5.06511	4.08155e-07	6.43652e-06	LAMA3	3909	1.06907e-05	106	106	85	171	234	222
987	ENSG00000140859	616.012	-0.867301	0.171265	-5.06409	4.10361e-07	6.46475e-06	KIFC3	3801	1.07376e-05	758	963	661	440	391	484
988	ENSG00000154277	2827.32	0.587335	0.116016	5.06252	4.1376e-07	6.5117e-06	UCHL1	7345	1.08156e-05	2220	2231	2327	3593	3207	3387
989	ENSG00000021826	5930.29	-0.625224	0.12353	-5.06132	4.16368e-07	6.54612e-06	CPS1	1373	1.08727e-05	7608	6327	7649	4781	4480	4737
990	ENSG00000119403	263.74	-0.990416	0.195776	-5.05893	4.21624e-07	6.62206e-06	PHF19	26147	1.09989e-05	372	392	284	194	151	189
991	ENSG00000258441	42.7459	-2.0835	0.412534	-5.0505	4.40661e-07	6.91406e-06	LINC00641	283624	1.14839e-05	69	89	51	10	22	15
992	ENSG00000144455	119.097	1.08113	0.214085	5.04998	4.41864e-07	6.92596e-06	SUMF1	285362	1.15036e-05	73	79	77	162	159	164
993	ENSG00000130311	362.705	0.803562	0.159169	5.04847	4.45353e-07	6.9736e-06	DDA1	79016	1.15828e-05	239	286	266	467	425	494
994	ENSG00000164587	8112.7	0.801098	0.158731	5.0469	4.49041e-07	7.02429e-06	RPS14	6208	1.16669e-05	5540	5840	6363	11593	7669	11670
995	ENSG00000123136	570.739	-0.764535	0.151546	-5.04489	4.53783e-07	7.09132e-06	DDX39A	10212	1.17783e-05	710	743	698	476	365	433
996	ENSG00000113924	2116.09	0.706448	0.140087	5.04293	4.58468e-07	7.15735e-06	HGD	3081	1.1888e-05	1676	1402	1745	2976	2389	2508
997	ENSG00000135018	525.539	-0.874631	0.173493	-5.04131	4.62364e-07	7.21093e-06	UBQLN1	29979	1.19769e-05	741	631	678	331	462	310
998	ENSG00000142798	2144.3	0.956512	0.189939	5.03589	4.75639e-07	7.41053e-06	HSPG2	3339	1.23085e-05	1720	1632	1025	2266	3375	2848
999	ENSG00000172037	481.85	0.991743	0.196948	5.03556	4.76447e-07	7.41569e-06	LAMB2	3913	1.2317e-05	373	238	353	574	553	801
1000	ENSG00000127129	12.4778	3.63443	0.721797	5.03525	4.77221e-07	7.42031e-06	EDN2	1907	1.23247e-05	2	1	2	17	24	28
1001	ENSG00000157106	163.91	-1.25505	0.249471	-5.03086	4.88273e-07	7.57858e-06	SMG1	23049	1.25876e-05	224	286	189	91	127	65
1002	ENSG00000120509	674.958	0.777832	0.154614	5.03079	4.88453e-07	7.57858e-06	PDZD11	51248	1.25876e-05	452	464	574	935	756	869
1003	ENSG00000154945	175.674	-1.08018	0.21472	-5.03063	4.88862e-07	7.57858e-06	ANKRD40	91369	1.25876e-05	236	272	213	105	135	93
1004	ENSG00000185641	463.566	1.0111	0.201037	5.02942	4.9197e-07	7.61916e-06	CTD-2287O16.1	NA	1.2655e-05	262	306	350	666	432	766
1005	ENSG00000251562	248.988	1.3737	0.273319	5.026	5.00807e-07	7.74831e-06	MALAT1	378938	1.28695e-05	131	113	169	216	293	572
1006	ENSG00000198189	191.197	-1.04461	0.207856	-5.02565	5.01731e-07	7.75489e-06	HSD17B11	51170	1.28804e-05	256	233	289	134	142	93
1007	ENSG00000159140	924.066	-0.756087	0.150495	-5.02401	5.06046e-07	7.81382e-06	SON	102465248	1.29783e-05	1291	1170	1028	651	785	620
1008	ENSG00000143799	935.169	-0.727378	0.144811	-5.02296	5.08808e-07	7.8433e-06	PARP1	142	1.30273e-05	1250	1248	996	720	659	738
1009	ENSG00000105722	478.996	-0.775679	0.154428	-5.0229	5.08964e-07	7.8433e-06	ERF	2077	1.30273e-05	539	669	605	351	343	368
1010	ENSG00000100479	53.6504	-1.73674	0.345996	-5.01954	5.17951e-07	7.97389e-06	POLE2	5427	1.32442e-05	85	95	69	19	30	23
1011	ENSG00000142230	1199.89	-0.682906	0.136057	-5.01927	5.18671e-07	7.97707e-06	SAE1	10055	1.32495e-05	1508	1560	1362	970	818	982
1012	ENSG00000101076	362.872	-0.837236	0.166863	-5.0175	5.23492e-07	8.0386e-06	HNF4A	3172	1.33517e-05	439	498	453	270	225	292
1013	ENSG00000102753	173.653	-1.3469	0.268453	-5.01726	5.24137e-07	8.0386e-06	KPNA3	3839	1.33517e-05	280	276	201	85	144	55
1014	ENSG00000215375	23.2291	2.57048	0.51233	5.01723	5.24223e-07	8.0386e-06	MYL5	4636	1.33517e-05	10	3	7	40	27	53
1015	ENSG00000128951	208.051	-1.07527	0.214369	-5.01596	5.27681e-07	8.08365e-06	DUT	1854	1.34265e-05	286	314	249	174	129	96
1016	ENSG00000263004	26.297	2.28498	0.455602	5.01531	5.29491e-07	8.103e-06	RP11-166P13.3	NA	1.34586e-05	9	6	12	56	35	40
1017	ENSG00000275216	174.171	1.04492	0.208354	5.01513	5.29986e-07	8.103e-06	RP11-54H7.4	NA	1.34586e-05	130	87	125	235	244	224
1018	ENSG00000154040	46.734	1.60977	0.321088	5.01348	5.34545e-07	8.16468e-06	CABYR	26256	1.35611e-05	22	23	25	66	67	78
1019	ENSG00000198034	14496.2	0.708326	0.141344	5.01135	5.40498e-07	8.2475e-06	RPS4X	6191	1.36986e-05	10270	10650	12097	19578	14684	19699
1020	ENSG00000177156	3029.14	0.687639	0.137271	5.00935	5.46151e-07	8.32559e-06	TALDO1	6888	1.38283e-05	2350	2295	2310	3970	3082	4168
1021	ENSG00000169689	398.989	-0.877206	0.175148	-5.00838	5.48893e-07	8.35919e-06	STRA13	201254	1.38841e-05	494	587	464	321	236	292
1022	ENSG00000167005	377.568	-0.834087	0.166711	-5.00319	5.63882e-07	8.57906e-06	NUDT21	11051	1.42493e-05	476	496	487	272	313	222
1023	ENSG00000143819	3874.29	0.87195	0.174289	5.0029	5.64729e-07	8.58355e-06	EPHX1	2052	1.42568e-05	2983	2073	3153	5471	3956	5609
1024	ENSG00000173156	95.5956	1.21058	0.242124	4.99985	5.73747e-07	8.7121e-06	RHOD	29984	1.44703e-05	58	65	49	140	121	141
1025	ENSG00000167123	113.47	1.16244	0.232615	4.99728	5.81438e-07	8.82028e-06	CERCAM	51148	1.465e-05	82	70	57	147	151	174
1026	ENSG00000163029	157.961	-1.17084	0.234397	-4.99513	5.87958e-07	8.91048e-06	SMC6	79677	1.47998e-05	218	198	248	94	125	65
1027	ENSG00000179862	250.668	0.90015	0.180222	4.99466	5.89396e-07	8.92357e-06	CITED4	163732	1.48215e-05	174	183	164	354	273	355
1028	ENSG00000162909	3037.71	0.639221	0.128004	4.99375	5.92194e-07	8.95723e-06	CAPN2	824	1.48774e-05	2533	2389	2209	3455	4142	3498
1029	ENSG00000180357	410.771	-0.750044	0.150211	-4.99325	5.93707e-07	8.97139e-06	ZNF609	23060	1.4901e-05	516	530	500	317	308	292
1030	ENSG00000132517	13.7624	3.30092	0.661193	4.99237	5.96423e-07	9.00367e-06	SLC52A1	55065	1.49546e-05	2	3	3	23	20	33
1031	ENSG00000145920	9267.02	-0.779298	0.156135	-4.99118	6.00101e-07	9.05041e-06	CPLX2	10814	1.50322e-05	12722	11016	11386	8252	5270	6956
1032	ENSG00000137504	138.632	-1.1126	0.222937	-4.99066	6.01745e-07	9.0664e-06	CREBZF	58487	1.50588e-05	209	178	186	98	94	68
1033	ENSG00000223784	75.7201	1.35914	0.27235	4.99041	6.02511e-07	9.06916e-06	RP11-554I8.2	NA	1.50634e-05	52	43	34	105	121	101
1034	ENSG00000114023	496.618	0.897299	0.179885	4.98819	6.09482e-07	9.16522e-06	FAM162A	26355	1.52229e-05	333	289	417	745	534	662
1035	ENSG00000050405	130.398	1.08841	0.218233	4.98737	6.12061e-07	9.19511e-06	LIMA1	51474	1.52726e-05	93	69	88	190	176	166
1036	ENSG00000166224	522.989	-0.810519	0.162572	-4.98561	6.17667e-07	9.27037e-06	SGPL1	8879	1.53976e-05	666	649	692	394	439	297
1037	ENSG00000107263	252.431	-0.92724	0.186022	-4.98457	6.20995e-07	9.31134e-06	RAPGEF1	2889	1.54656e-05	355	353	283	194	163	166
1038	ENSG00000107672	174.749	-0.985045	0.19771	-4.98226	6.28449e-07	9.41402e-06	NSMCE4A	54780	1.56361e-05	226	224	244	113	110	131
1039	ENSG00000158402	59.2913	-1.55313	0.311753	-4.98192	6.29572e-07	9.42177e-06	CDC25C	995	1.5649e-05	86	94	85	30	30	30
1040	ENSG00000088899	62.5179	1.43501	0.288161	4.9799	6.36183e-07	9.51154e-06	LZTS3	9762	1.57981e-05	30	33	38	78	104	91
1041	ENSG00000163735	4226.04	0.69391	0.139504	4.97413	6.55419e-07	9.78974e-06	CXCL5	6374	1.62602e-05	3009	3819	2861	5044	5659	4964
1042	ENSG00000179604	568.914	-0.704665	0.141675	-4.97379	6.56551e-07	9.79723e-06	CDC42EP4	23580	1.62726e-05	714	719	678	443	403	456
1043	ENSG00000140157	464.904	-1.00733	0.202582	-4.97244	6.61171e-07	9.85671e-06	NIPA2	81614	1.63714e-05	700	616	557	309	403	204
1044	ENSG00000166710	964.506	0.727073	0.146301	4.96972	6.70508e-07	9.98633e-06	B2M	567	1.65867e-05	717	667	801	1163	1376	1063
1045	ENSG00000213614	212.855	0.957076	0.192598	4.9693	6.71935e-07	9.99801e-06	HEXA	3073	1.66061e-05	141	134	157	244	259	343
1046	ENSG00000108424	2599.6	-0.650471	0.130923	-4.96834	6.7529e-07	1.00305e-05	KPNB1	3837	1.66601e-05	3213	3487	2834	2035	2170	1859
1047	ENSG00000065970	117.669	-1.13859	0.229171	-4.9683	6.7541e-07	1.00305e-05	FOXJ2	55810	1.66601e-05	171	153	160	75	69	78
1048	ENSG00000184897	505.134	-0.848386	0.170828	-4.96633	6.82327e-07	1.01236e-05	H1FX	8971	1.68147e-05	549	753	641	384	311	393
1049	ENSG00000225912	225.674	1.03123	0.207673	4.96566	6.84667e-07	1.01467e-05	RP13-258O15.1	NA	1.68531e-05	146	138	158	365	220	327
1050	ENSG00000183978	536.461	0.746692	0.150375	4.96551	6.8519e-07	1.01467e-05	COA3	28958	1.68531e-05	398	397	403	745	578	698
1051	ENSG00000143545	272.517	1.29269	0.260437	4.96354	6.92182e-07	1.02405e-05	RAB13	5872	1.70088e-05	124	135	212	385	240	539
1052	ENSG00000249199	74.5519	1.33396	0.268785	4.96293	6.94378e-07	1.02632e-05	CTD-2139B15.5	NA	1.70466e-05	38	46	42	117	89	116
1053	ENSG00000235776	165.436	1.06952	0.215626	4.96008	7.04644e-07	1.0405e-05	AC000089.3	NA	1.72822e-05	108	99	110	230	171	275
1054	ENSG00000143228	68.3326	-1.57304	0.317214	-4.95893	7.08813e-07	1.04567e-05	NUF2	83540	1.73679e-05	109	100	103	23	48	28
1055	ENSG00000267106	23.3527	2.27237	0.458278	4.9585	7.10378e-07	1.0461e-05	ZNF561-AS1	284385	1.73751e-05	7	8	9	42	41	33
1056	ENSG00000101126	433.7	-0.961488	0.193908	-4.95848	7.10451e-07	1.0461e-05	ADNP	23394	1.73751e-05	588	567	575	303	375	194
1057	ENSG00000030066	301.327	-0.834102	0.168499	-4.95018	7.41451e-07	1.09071e-05	NUP160	23279	1.81161e-05	378	404	382	208	241	196
1058	ENSG00000158042	672.931	0.791035	0.159875	4.94784	7.50404e-07	1.10284e-05	MRPL17	63875	1.83175e-05	482	511	482	1006	687	869
1059	ENSG00000133119	114.891	-1.19326	0.241249	-4.94619	7.5679e-07	1.11117e-05	RFC3	5983	1.84559e-05	159	179	142	84	65	60
1060	ENSG00000110719	488.826	0.808311	0.163428	4.94597	7.57654e-07	1.11139e-05	TCIRG1	10312	1.84596e-05	416	324	322	640	553	677
1061	ENSG00000185201	1450.09	0.832814	0.168612	4.93922	7.84356e-07	1.14948e-05	IFITM2	10581	1.90922e-05	1034	869	1220	1964	1468	2146
1062	ENSG00000102934	151.27	1.10276	0.223299	4.9385	7.87252e-07	1.15177e-05	PLLP	51090	1.91303e-05	94	81	111	230	162	229
1063	ENSG00000177602	42.2176	-2.02675	0.4104	-4.93846	7.87403e-07	1.15177e-05	GSG2	83903	1.91303e-05	73	86	45	17	17	15
1064	ENSG00000142541	21346.8	0.658426	0.133417	4.93511	8.01073e-07	1.17067e-05	RPL13A	23521	1.94441e-05	16103	16348	17219	28726	21630	28055
1065	ENSG00000166816	66.4114	1.51951	0.308092	4.93198	8.13999e-07	1.18844e-05	LDHD	197257	1.97393e-05	42	30	30	134	76	86
1066	ENSG00000219451	23.8412	2.8684	0.581691	4.93114	8.17529e-07	1.19247e-05	AC005251.3	NA	1.98063e-05	5	7	5	59	12	55
1067	ENSG00000168461	362.413	-0.897993	0.182167	-4.92952	8.24337e-07	1.20128e-05	RAB31	11031	1.99525e-05	497	465	460	295	279	179
1068	ENSG00000095485	177.128	-1.01638	0.206259	-4.9277	8.32047e-07	1.21138e-05	CWF19L1	55280	2.01203e-05	236	272	204	124	116	111
1069	ENSG00000091262	59.8669	1.53006	0.310557	4.92684	8.35688e-07	1.21554e-05	ABCC6	105369239	2.01894e-05	28	28	34	87	65	116
1070	ENSG00000129173	32.0127	-2.36659	0.480424	-4.92606	8.39054e-07	1.21929e-05	E2F8	79733	2.02518e-05	61	63	38	5	14	10
1071	ENSG00000133706	710.008	-0.763499	0.154998	-4.92586	8.39897e-07	1.21938e-05	LARS	51520	2.02532e-05	901	925	862	605	552	416
1072	ENSG00000143222	705.645	0.763316	0.154993	4.92485	8.44272e-07	1.22459e-05	UFC1	51506	2.03397e-05	546	470	549	947	737	985
1073	ENSG00000131469	5331.98	0.681318	0.138352	4.92453	8.45616e-07	1.22539e-05	RPL27	6155	2.03531e-05	3839	4178	4266	7502	5453	6754
1074	ENSG00000112640	218.973	-0.928016	0.188609	-4.92031	8.64062e-07	1.25096e-05	PPP2R5D	5528	2.07777e-05	302	303	254	159	138	159
1075	ENSG00000158406	47.3781	1.82808	0.371559	4.92003	8.65315e-07	1.25161e-05	HIST1H4H	8365	2.07885e-05	15	16	32	58	98	65
1076	ENSG00000249196	70.7435	1.77878	0.361627	4.91883	8.70621e-07	1.25811e-05	RP11-669N7.2	283352	2.08965e-05	19	31	45	68	90	171
1077	ENSG00000180964	74.6587	1.42435	0.289605	4.91823	8.73289e-07	1.2608e-05	TCEAL8	90843	2.09411e-05	40	29	52	117	90	121
1078	ENSG00000226525	36.256	2.77205	0.564016	4.91484	8.88552e-07	1.28164e-05	RPS7P10	NA	2.12873e-05	10	9	8	92	10	88
1079	ENSG00000206503	276.835	0.977704	0.198978	4.91363	8.94077e-07	1.28842e-05	HLA-A	3105	2.13998e-05	146	200	211	321	332	451
1080	ENSG00000064666	1141.48	0.755418	0.153751	4.91325	8.95812e-07	1.28972e-05	CNN2	1265	2.14215e-05	828	1002	716	1284	1442	1577
1081	ENSG00000166123	391.574	-0.959748	0.195353	-4.91288	8.97469e-07	1.29091e-05	GPT2	84706	2.14413e-05	413	471	668	291	254	252
1082	ENSG00000185527	10.9793	4.04576	0.824252	4.90841	9.18196e-07	1.3195e-05	PDE6G	5148	2.19162e-05	2	1	1	21	16	25
1083	ENSG00000159259	136.719	-1.25136	0.254975	-4.90776	9.21226e-07	1.32259e-05	CHAF1B	8208	2.19675e-05	205	229	144	105	74	63
1084	ENSG00000153044	64.6088	-1.57495	0.320921	-4.90759	9.22047e-07	1.32259e-05	CENPH	64946	2.19675e-05	96	110	89	33	42	18
1085	ENSG00000183255	849.51	0.65595	0.133696	4.90628	9.28186e-07	1.33017e-05	PTTG1IP	754	2.20934e-05	697	631	654	1085	1086	944
1086	ENSG00000105223	1320.81	0.677789	0.138214	4.9039	9.39519e-07	1.34517e-05	PLD3	23646	2.23426e-05	999	977	1066	1549	1450	1884
1087	ENSG00000124201	365.581	0.810622	0.165373	4.90177	9.49772e-07	1.3586e-05	ZNFX1	57169	2.25656e-05	306	263	228	447	482	468
1088	ENSG00000136492	43.438	-2.00731	0.409642	-4.90016	9.57603e-07	1.36855e-05	BRIP1	83990	2.27308e-05	68	88	56	21	22	5
1089	ENSG00000168488	690.864	-0.676611	0.138086	-4.89992	9.58751e-07	1.36893e-05	ATXN2L	11273	2.27371e-05	791	899	861	508	550	536
1090	ENSG00000161888	74.126	-1.60569	0.327821	-4.89806	9.67859e-07	1.38052e-05	SPC24	147841	2.29297e-05	114	141	83	49	40	18
1091	ENSG00000111581	296.971	-0.896995	0.183139	-4.8979	9.68649e-07	1.38052e-05	NUP107	57122	2.29297e-05	417	368	382	215	242	159
1092	ENSG00000182899	2749.57	0.701672	0.143267	4.89765	9.69906e-07	1.38105e-05	RPL35A	6165	2.29384e-05	1950	2059	2268	3886	2816	3518
1093	ENSG00000250539	2049.89	0.718083	0.146676	4.89571	9.79494e-07	1.39343e-05	KRT8P33	NA	2.3144e-05	1620	1656	1368	2731	2108	2816
1094	ENSG00000171858	3533.98	0.738923	0.150967	4.89459	9.85087e-07	1.4001e-05	RPS21	6227	2.32549e-05	2477	2599	2863	4995	3459	4810
1095	ENSG00000152795	594.19	-0.727197	0.148678	-4.89108	1.00286e-06	1.42405e-05	HNRNPDL	9987	2.36527e-05	674	740	810	487	443	411
1096	ENSG00000186174	705.517	-0.85575	0.175032	-4.88912	1.01289e-06	1.43699e-05	BCL9L	283149	2.38676e-05	935	1093	701	457	551	496
1097	ENSG00000198959	19368.7	0.595077	0.121782	4.88639	1.02701e-06	1.45569e-05	TGM2	7052	2.41782e-05	16068	16589	13630	23508	22140	24278
1098	ENSG00000137731	55.7001	2.02209	0.414052	4.88366	1.04134e-06	1.47466e-05	FXYD2	486	2.44933e-05	21	19	25	110	31	128
1099	ENSG00000238103	200.855	1.21823	0.2495	4.88268	1.04656e-06	1.4807e-05	RPL9P7	NA	2.45936e-05	108	101	151	352	178	315
1100	ENSG00000137770	51.3107	-1.69035	0.346241	-4.88199	1.05019e-06	1.48448e-05	CTDSPL2	51496	2.46564e-05	79	90	66	19	26	28
1101	ENSG00000110011	186.986	1.01664	0.20832	4.8802	1.0598e-06	1.49671e-05	DNAJC4	3338	2.48596e-05	124	107	138	272	197	285
1102	ENSG00000184840	2090.71	0.64505	0.132214	4.87883	1.06715e-06	1.50573e-05	TMED9	54732	2.50094e-05	1670	1659	1558	2646	2199	2813
1103	ENSG00000120539	99.1547	-1.23956	0.254113	-4.87798	1.07178e-06	1.51089e-05	MASTL	84930	2.50951e-05	139	154	128	61	67	45
1104	ENSG00000181524	82.893	1.73248	0.355789	4.86941	1.11933e-06	1.57649e-05	RPL24P4	NA	2.61847e-05	43	40	30	157	54	174
1105	ENSG00000168476	352.214	-0.801571	0.164745	-4.86553	1.14153e-06	1.60487e-05	REEP4	80346	2.6656e-05	421	493	428	283	242	247
1106	ENSG00000189058	14.818	3.26172	0.670375	4.86552	1.14154e-06	1.60487e-05	APOD	347	2.6656e-05	2	3	3	16	20	45
1107	ENSG00000120438	1663.92	-0.70801	0.145524	-4.86526	1.14306e-06	1.60556e-05	TCP1	6950	2.66674e-05	2218	2042	1939	1421	1339	1022
1108	ENSG00000231991	4125.47	0.741466	0.15242	4.86463	1.1467e-06	1.6092e-05	ANXA2P2	NA	2.6728e-05	2937	2906	3415	5360	4084	6052
1109	ENSG00000146063	183.031	-0.967767	0.199119	-4.86023	1.17249e-06	1.64392e-05	TRIM41	90933	2.73046e-05	244	238	241	140	105	131
1110	ENSG00000129824	1345.54	0.64463	0.13266	4.85926	1.17825e-06	1.6505e-05	RPS4Y1	6192	2.74139e-05	1076	997	1073	1805	1452	1670
1111	ENSG00000122863	538.237	0.804435	0.165709	4.8545	1.20688e-06	1.68909e-05	CHST3	9469	2.80549e-05	442	426	308	647	704	703
1112	ENSG00000123144	769.72	0.756939	0.155932	4.85428	1.20824e-06	1.68947e-05	C19orf43	79002	2.80612e-05	531	582	598	1008	786	1113
1113	ENSG00000213523	547.743	0.724832	0.149348	4.85329	1.21428e-06	1.6964e-05	SRA1	10011	2.81762e-05	404	404	427	696	593	763
1114	ENSG00000085117	68.9127	1.49637	0.308362	4.85266	1.21819e-06	1.70033e-05	CD82	3732	2.82416e-05	44	22	41	98	88	121
1115	ENSG00000115524	932.188	-0.768622	0.158433	-4.8514	1.22596e-06	1.70964e-05	SF3B1	23451	2.83961e-05	1261	1073	1201	689	818	552
1116	ENSG00000129559	563.316	0.764802	0.15766	4.85097	1.22861e-06	1.7118e-05	NEDD8	4738	2.8432e-05	414	406	428	813	583	735
1117	ENSG00000196072	312.354	0.860523	0.177511	4.84773	1.24883e-06	1.73842e-05	BLOC1S2	282991	2.88741e-05	199	241	230	429	451	325
1118	ENSG00000105499	11.884	3.54291	0.731022	4.84652	1.25645e-06	1.74746e-05	PLA2G4C	8605	2.90243e-05	2	3	1	17	21	28
1119	ENSG00000156795	110.473	-1.2251	0.252893	-4.84436	1.27021e-06	1.76501e-05	WDYHV1	55093	2.93158e-05	158	153	150	84	48	71
1120	ENSG00000101441	17.1207	3.07911	0.636336	4.83881	1.30617e-06	1.81336e-05	CST4	1472	3.01189e-05	4	1	6	31	18	43
1121	ENSG00000071626	542.794	-0.730877	0.151175	-4.83463	1.33392e-06	1.85023e-05	DAZAP1	26528	3.07313e-05	679	751	600	406	397	423
1122	ENSG00000230629	2536.39	0.756797	0.156618	4.83213	1.35083e-06	1.87202e-05	RPS23P8	NA	3.10933e-05	1824	1698	2131	3647	2513	3405
1123	ENSG00000186566	229.637	-0.861947	0.178472	-4.82959	1.36814e-06	1.89432e-05	GPATCH8	23131	3.14636e-05	293	292	305	153	175	159
1124	ENSG00000056097	437.099	-0.89867	0.186124	-4.82834	1.37673e-06	1.90452e-05	ZFR	51663	3.1633e-05	594	593	531	302	384	219
1125	ENSG00000233966	386.105	-0.918035	0.190167	-4.82752	1.38241e-06	1.91067e-05	UBE2SP1	NA	3.17352e-05	523	610	381	284	256	262
1126	ENSG00000156467	2271.93	0.829996	0.171942	4.82718	1.38481e-06	1.91229e-05	UQCRB	7381	3.17621e-05	1608	1263	2038	3392	2757	2574
1127	ENSG00000197728	1917.02	0.650891	0.134858	4.8265	1.38956e-06	1.91714e-05	RPS26	101929876	3.18427e-05	1506	1621	1348	2635	2183	2209
1128	ENSG00000065135	306.392	-0.868216	0.179954	-4.82467	1.40237e-06	1.9331e-05	GNAI3	406974	3.21077e-05	416	412	366	208	257	179
1129	ENSG00000126351	186.053	-0.943509	0.195595	-4.82379	1.40856e-06	1.93992e-05	THRA	7067	3.2221e-05	239	253	242	148	120	113
1130	ENSG00000102554	485.379	-0.841652	0.174494	-4.82338	1.41146e-06	1.94219e-05	KLF5	688	3.22587e-05	614	522	732	295	359	390
1131	ENSG00000162520	41.5065	1.62956	0.338057	4.82036	1.43297e-06	1.97005e-05	SYNC	81493	3.27214e-05	21	21	19	68	65	55
1132	ENSG00000205542	8493.54	0.738413	0.153261	4.818	1.45007e-06	1.9918e-05	TMSB4X	7114	3.30827e-05	5633	6833	6627	11696	8268	11905
1133	ENSG00000171443	154.023	1.01215	0.210188	4.81545	1.4687e-06	2.01561e-05	ZNF524	147807	3.34782e-05	109	105	89	202	177	242
1134	ENSG00000145555	807.529	-0.64037	0.133068	-4.81237	1.49155e-06	2.04515e-05	MYO10	4651	3.39688e-05	939	1000	1015	598	666	627
1135	ENSG00000006025	38.8357	1.81077	0.376346	4.81144	1.49845e-06	2.05281e-05	OSBPL7	114881	3.4096e-05	17	15	19	42	55	86
1136	ENSG00000065060	172.831	-1.10601	0.230141	-4.80579	1.54143e-06	2.10881e-05	UHRF1BP1	54887	3.50262e-05	231	220	265	110	141	71
1137	ENSG00000151655	137.711	1.13649	0.236488	4.80571	1.54204e-06	2.10881e-05	ITIH2	3698	3.50262e-05	77	72	108	188	155	227
1138	ENSG00000130517	153.007	0.984152	0.204817	4.80503	1.54727e-06	2.1141e-05	PGPEP1	54858	3.51139e-05	113	88	107	187	207	217
1139	ENSG00000125863	289.732	-1.09232	0.227338	-4.80485	1.54867e-06	2.11415e-05	MKKS	8195	3.51149e-05	354	350	488	209	227	111
1140	ENSG00000131374	361.299	-0.760301	0.158273	-4.80373	1.55734e-06	2.12413e-05	TBC1D5	9779	3.52806e-05	465	474	427	276	280	247
1141	ENSG00000268942	48.0849	-1.7474	0.363788	-4.80335	1.56033e-06	2.12635e-05	CKS1BP3	NA	3.53174e-05	73	87	66	23	28	13
1142	ENSG00000112312	141.299	-1.13671	0.236737	-4.80158	1.57416e-06	2.14331e-05	GMNN	51053	3.55992e-05	219	215	151	92	97	73
1143	ENSG00000182718	24255.8	0.587776	0.122446	4.80028	1.58442e-06	2.15539e-05	ANXA2	302	3.57997e-05	18238	18665	21239	29332	26607	31455
1144	ENSG00000182154	616.178	0.840703	0.175244	4.79734	1.6079e-06	2.18372e-05	MRPL41	64975	3.62703e-05	428	437	455	910	581	886
1145	ENSG00000105887	565.294	-0.922027	0.192196	-4.79732	1.60805e-06	2.18372e-05	MTPN	136319	3.62703e-05	820	753	658	338	521	302
1146	ENSG00000107175	553.22	0.68481	0.142782	4.79618	1.61716e-06	2.19417e-05	CREB3	10488	3.6444e-05	444	427	400	703	626	720
1147	ENSG00000227234	19.9917	2.6391	0.550499	4.79401	1.63479e-06	2.21616e-05	SPANXB1	107984060	3.68092e-05	6	6	5	21	25	58
1148	ENSG00000105379	409.927	0.988509	0.206253	4.7927	1.64548e-06	2.22871e-05	ETFB	2109	3.70175e-05	269	235	315	546	384	710
1149	ENSG00000137207	529.431	0.786714	0.164199	4.79122	1.65768e-06	2.24328e-05	YIPF3	25844	3.72597e-05	381	348	433	652	573	791
1150	ENSG00000166582	170.65	-1.08885	0.227435	-4.78752	1.68857e-06	2.28309e-05	CENPV	201161	3.79208e-05	230	288	178	112	106	111
1151	ENSG00000173692	1083.32	-0.643403	0.134412	-4.7868	1.69458e-06	2.28923e-05	PSMD1	5707	3.80228e-05	1474	1231	1257	874	828	836
1152	ENSG00000108846	2034.28	0.661211	0.1382	4.78445	1.7146e-06	2.31427e-05	ABCC3	8714	3.84386e-05	1690	1409	1624	2475	2195	2813
1153	ENSG00000124098	187.617	0.903162	0.188808	4.78349	1.72279e-06	2.3233e-05	FAM210B	116151	3.85887e-05	126	126	142	253	264	214
1154	ENSG00000179950	1468.98	-0.614145	0.128509	-4.779	1.76167e-06	2.37368e-05	PUF60	22827	3.94255e-05	1743	1890	1691	1179	1063	1247
1155	ENSG00000100003	62.822	1.35396	0.283357	4.77828	1.76798e-06	2.38011e-05	SEC14L2	23541	3.95323e-05	37	38	30	96	82	93
1156	ENSG00000165118	107.268	-1.17198	0.245341	-4.77696	1.77967e-06	2.39377e-05	C9orf64	84267	3.97592e-05	141	147	160	54	78	63
1157	ENSG00000070950	111.627	-1.27849	0.267654	-4.77664	1.78246e-06	2.39525e-05	RAD18	56852	3.97838e-05	164	183	132	51	87	53
1158	ENSG00000233369	320.038	-0.929694	0.19464	-4.77649	1.78385e-06	2.39525e-05	GTF2IP4	100093631	3.97838e-05	469	369	429	237	260	156
1159	ENSG00000090512	9.95538	4.94154	1.03467	4.77596	1.78856e-06	2.39951e-05	FETUB	26998	3.98545e-05	1	1	0	16	17	25
1160	ENSG00000013810	516.716	-0.813587	0.170438	-4.7735	1.81047e-06	2.42519e-05	TACC3	10460	4.0281e-05	651	774	546	372	340	418
1161	ENSG00000279800	230.199	-0.91513	0.191712	-4.77347	1.81082e-06	2.42519e-05	BCLAF1P2	NA	4.0281e-05	338	292	277	171	175	128
1162	ENSG00000087087	634.059	-0.818969	0.171615	-4.77214	1.82281e-06	2.43915e-05	SRRT	51593	4.05129e-05	872	911	639	476	400	506
1163	ENSG00000125844	4559.57	0.753042	0.157854	4.77048	1.83787e-06	2.45719e-05	RRBP1	6238	4.08125e-05	3640	2831	3710	5252	4943	6981
1164	ENSG00000177469	2236.31	0.755412	0.158393	4.76922	1.84942e-06	2.4705e-05	PTRF	284119	4.10336e-05	1719	1941	1328	2485	2725	3219
1165	ENSG00000265735	51.5181	1.5271	0.320431	4.76576	1.88147e-06	2.51115e-05	RN7SL5P	NA	4.17088e-05	21	33	26	87	72	71
1166	ENSG00000141580	344.772	-0.808194	0.169595	-4.76543	1.8845e-06	2.51166e-05	WDR45B	56270	4.17172e-05	415	462	447	255	284	207
1167	ENSG00000127804	327.02	-0.796227	0.167086	-4.76537	1.88507e-06	2.51166e-05	METTL16	79066	4.17172e-05	400	426	423	208	267	239
1168	ENSG00000229659	61.9716	1.41742	0.297593	4.76294	1.90788e-06	2.53987e-05	RP11-345K20.2	NA	4.21858e-05	26	40	35	103	80	88
1169	ENSG00000144580	325.92	-0.786645	0.165321	-4.75828	1.95249e-06	2.59703e-05	CNOT9	9125	4.31352e-05	427	439	374	230	254	232
1170	ENSG00000117691	632.607	0.841544	0.17689	4.75743	1.96069e-06	2.60571e-05	NENF	29937	4.32794e-05	416	436	502	848	612	982
1171	ENSG00000168056	521.511	0.720165	0.151408	4.75644	1.97033e-06	2.61628e-05	LTBP3	4054	4.3455e-05	430	394	355	600	627	723
1172	ENSG00000283498	253.598	-1.22838	0.258277	-4.75604	1.9743e-06	2.61932e-05	MIR1244-2	100422885	4.35054e-05	365	343	368	106	240	98
1173	ENSG00000116852	49.2999	-1.95525	0.411182	-4.7552	1.98252e-06	2.62632e-05	KIF21B	23046	4.36217e-05	74	62	101	5	29	25
1174	ENSG00000254999	867.621	0.650658	0.136832	4.75515	1.98296e-06	2.62632e-05	BRK1	55845	4.36217e-05	697	602	727	1118	1039	1022
1175	ENSG00000170734	93.4688	1.13561	0.238829	4.7549	1.98543e-06	2.62736e-05	POLH	5429	4.3639e-05	63	60	54	127	139	118
1176	ENSG00000278133	25.1247	2.09039	0.439691	4.75423	1.99203e-06	2.63385e-05	RP11-196G11.5	NA	4.37468e-05	9	9	11	33	41	48
1177	ENSG00000116127	75.0375	-1.33386	0.280709	-4.75177	2.01648e-06	2.66391e-05	ALMS1	7840	4.42461e-05	116	104	101	37	42	50
1178	ENSG00000204469	1198.91	-0.676854	0.14258	-4.74719	2.06267e-06	2.72262e-05	PRRC2A	7916	4.52211e-05	1597	1574	1250	917	873	982
1179	ENSG00000198791	505.719	-0.924168	0.194702	-4.74657	2.06894e-06	2.72857e-05	CNOT7	29883	4.53201e-05	710	613	675	365	443	229
1180	ENSG00000137309	2482.35	-0.76138	0.16042	-4.74616	2.07315e-06	2.73181e-05	HMGA1	3159	4.53738e-05	3022	3885	2462	1737	1944	1843
1181	ENSG00000128944	147.012	-1.03655	0.218517	-4.74357	2.09986e-06	2.76466e-05	KNSTRN	90417	4.59195e-05	191	208	198	106	108	71
1182	ENSG00000114354	904.994	0.619753	0.130702	4.74173	2.11897e-06	2.78747e-05	TFG	10342	4.62983e-05	717	667	757	1038	1128	1123
1183	ENSG00000138346	45.3643	-1.8203	0.384254	-4.73722	2.16667e-06	2.8478e-05	DNA2	1763	4.73004e-05	82	77	56	17	27	13
1184	ENSG00000089220	1802.16	0.574932	0.12144	4.73431	2.19803e-06	2.88658e-05	PEBP1	5037	4.79445e-05	1436	1399	1505	2224	1998	2251
1185	ENSG00000135414	72.0173	1.36114	0.287708	4.73097	2.23447e-06	2.93197e-05	GDF11	10220	4.86984e-05	34	53	33	99	94	118
1186	ENSG00000080986	50.3453	-1.62003	0.342718	-4.727	2.27864e-06	2.9874e-05	NDC80	10403	4.96189e-05	76	72	82	24	30	18
1187	ENSG00000115738	227.355	-0.941368	0.199189	-4.72601	2.28977e-06	2.99946e-05	ID2	3398	4.98193e-05	274	282	341	192	142	133
1188	ENSG00000166881	50.1997	-1.87148	0.396316	-4.72219	2.33317e-06	3.05374e-05	NEMP1	23306	5.07209e-05	86	85	68	7	34	20
1189	ENSG00000181467	249.916	0.864268	0.183036	4.72185	2.33713e-06	3.05636e-05	RAP2B	5912	5.07643e-05	159	212	160	321	313	335
1190	ENSG00000142168	1379.39	0.695348	0.147305	4.72048	2.35291e-06	3.07241e-05	SOD1	6647	5.10309e-05	985	1000	1169	1755	1431	1937
1191	ENSG00000164919	953.76	0.8074	0.171043	4.72044	2.35336e-06	3.07241e-05	COX6C	1345	5.10309e-05	667	544	871	1341	1167	1133
1192	ENSG00000115464	300.676	-1.03838	0.219998	-4.71996	2.35896e-06	3.07714e-05	USP34	9736	5.11095e-05	441	406	376	171	276	133
1193	ENSG00000170906	824.232	0.761687	0.161397	4.71935	2.36598e-06	3.0837e-05	NDUFA3	4696	5.12185e-05	581	570	679	1155	822	1138
1194	ENSG00000011478	136.263	1.08813	0.230833	4.71393	2.42986e-06	3.16431e-05	QPCTL	54814	5.25574e-05	90	99	70	204	148	207
1195	ENSG00000007255	129.466	1.30542	0.276973	4.71316	2.43909e-06	3.17367e-05	TRAPPC6A	79090	5.27129e-05	64	56	101	185	126	244
1196	ENSG00000114395	135.185	0.980808	0.208116	4.71279	2.44347e-06	3.17672e-05	CYB561D2	11068	5.27635e-05	94	92	87	199	180	159
1197	ENSG00000257556	37.0353	1.74362	0.370088	4.71139	2.46038e-06	3.19603e-05	RP11-44N21.1	NA	5.30843e-05	15	15	21	72	49	50
1198	ENSG00000237748	183.448	0.957497	0.203242	4.71112	2.46357e-06	3.19751e-05	UQCRBP1	NA	5.31087e-05	130	99	145	260	242	224
1199	ENSG00000138119	2525.04	0.672646	0.142873	4.70799	2.50172e-06	3.24321e-05	MYOF	26509	5.38679e-05	2094	2079	1672	2785	3539	2982
1200	ENSG00000146477	246.697	-0.943967	0.200508	-4.70787	2.50321e-06	3.24321e-05	SLC22A3	6581	5.38679e-05	350	314	318	173	207	118
1201	ENSG00000128513	73.3344	-1.4002	0.297427	-4.70772	2.50505e-06	3.24321e-05	POT1	25913	5.38679e-05	118	100	105	31	53	33
1202	ENSG00000171159	224.988	0.891144	0.189318	4.70712	2.51242e-06	3.25005e-05	C9orf16	79095	5.39815e-05	147	158	166	333	239	307
1203	ENSG00000005339	278.014	-0.865257	0.183837	-4.70664	2.5183e-06	3.25139e-05	CREBBP	1387	5.40037e-05	341	418	321	206	211	171
1204	ENSG00000039123	392.047	-1.02722	0.218252	-4.70658	2.5191e-06	3.25139e-05	SKIV2L2	23517	5.40037e-05	564	491	535	256	353	154
1205	ENSG00000218336	236.535	-0.896195	0.190415	-4.70653	2.51973e-06	3.25139e-05	TENM3	55714	5.40037e-05	339	311	279	171	186	133
1206	ENSG00000042088	103.735	-1.23007	0.261518	-4.70357	2.55647e-06	3.29607e-05	TDP1	55775	5.47458e-05	164	151	127	52	79	50
1207	ENSG00000171206	298.501	0.778471	0.165521	4.70317	2.56151e-06	3.29983e-05	TRIM8	81603	5.48083e-05	201	227	231	340	386	405
1208	ENSG00000138182	112.05	-1.19667	0.254456	-4.70285	2.56557e-06	3.30232e-05	KIF20B	9585	5.48497e-05	169	177	126	65	81	55
1209	ENSG00000198554	105.149	-1.26314	0.268659	-4.70163	2.58087e-06	3.31927e-05	WDHD1	11169	5.51312e-05	168	163	119	58	78	45
1210	ENSG00000118181	3760.52	0.795012	0.169111	4.70112	2.58745e-06	3.32497e-05	RPS25	6230	5.52259e-05	2549	2511	3184	5424	3523	5372
1211	ENSG00000163682	3840.79	0.6437	0.136944	4.70045	2.59588e-06	3.33032e-05	RPL9	6133	5.53147e-05	2789	2736	3471	5112	4680	4256
1212	ENSG00000124151	488.211	-0.764175	0.162575	-4.70045	2.59589e-06	3.33032e-05	NCOA3	8202	5.53147e-05	622	631	599	344	431	302
1213	ENSG00000120437	453.69	-0.776151	0.165149	-4.69969	2.60555e-06	3.33996e-05	ACAT2	39	5.54748e-05	645	577	501	359	353	287
1214	ENSG00000180210	174.466	0.929037	0.197692	4.69941	2.6091e-06	3.34175e-05	F2	2147	5.55046e-05	139	103	119	220	230	237
1215	ENSG00000132744	142.953	0.961718	0.204658	4.69914	2.61263e-06	3.34352e-05	ACY3	91703	5.55339e-05	105	94	91	195	174	199
1216	ENSG00000103227	169.279	1.03278	0.219804	4.69865	2.61889e-06	3.34877e-05	LMF1	64788	5.56212e-05	114	86	131	230	190	264
1217	ENSG00000102572	1053.6	-0.767847	0.163445	-4.69788	2.62874e-06	3.35861e-05	STK24	8428	5.57846e-05	1442	1126	1415	952	716	670
1218	ENSG00000108587	348.888	-0.825824	0.175796	-4.69762	2.63215e-06	3.35942e-05	GOSR1	9527	5.57981e-05	453	389	501	269	272	209
1219	ENSG00000146374	403.244	0.731916	0.15581	4.6975	2.6337e-06	3.35942e-05	RSPO3	84870	5.57981e-05	311	319	276	544	457	511
1220	ENSG00000103460	32.8132	-2.08333	0.444178	-4.69031	2.72795e-06	3.47679e-05	TOX3	27324	5.77475e-05	46	58	58	10	17	8
1221	ENSG00000113649	250.689	-0.888679	0.189487	-4.68992	2.73314e-06	3.48055e-05	TCERG1	10915	5.781e-05	356	331	295	153	208	161
1222	ENSG00000092010	925.929	0.831189	0.177238	4.68968	2.7363e-06	3.48173e-05	PSME1	5720	5.78295e-05	595	648	752	1427	877	1257
1223	ENSG00000184992	293.824	-0.890878	0.189991	-4.68905	2.74479e-06	3.48968e-05	BRI3BP	140707	5.79616e-05	423	419	307	215	223	176
1224	ENSG00000164151	211.112	-1.10542	0.235785	-4.68827	2.75526e-06	3.50012e-05	ICE1	23379	5.81351e-05	310	290	273	92	191	111
1225	ENSG00000235275	28.6127	2.45377	0.523716	4.68531	2.7954e-06	3.54822e-05	KRT18P16	NA	5.89338e-05	10	11	5	61	17	68
1226	ENSG00000132581	322.162	0.737494	0.157421	4.68487	2.80143e-06	3.55298e-05	SDF2	6388	5.90129e-05	251	242	230	398	384	428
1227	ENSG00000128708	181.398	-1.11133	0.237229	-4.68464	2.80453e-06	3.554e-05	HAT1	8520	5.903e-05	286	236	231	119	150	68
1228	ENSG00000120708	5391.08	0.591259	0.12622	4.68437	2.80826e-06	3.55583e-05	TGFBI	7045	5.90604e-05	4258	4716	3926	6654	5882	6911
1229	ENSG00000085511	82.7597	-1.24078	0.264954	-4.683	2.8271e-06	3.57677e-05	MAP3K4	4216	5.94081e-05	113	115	121	56	47	45
1230	ENSG00000150712	149.609	-1.0009	0.213817	-4.6811	2.85346e-06	3.6072e-05	MTMR12	54545	5.99135e-05	220	201	180	106	105	86
1231	ENSG00000213551	127.344	-1.16226	0.248473	-4.67761	2.90239e-06	3.66606e-05	DNAJC9	23234	6.08912e-05	176	203	147	101	62	76
1232	ENSG00000214655	113.928	1.05329	0.225249	4.67609	2.9239e-06	3.69024e-05	ZSWIM8	23053	6.12928e-05	84	73	64	148	148	166
1233	ENSG00000181789	1647.68	0.587198	0.125597	4.67525	2.93596e-06	3.70246e-05	COPG1	22820	6.14957e-05	1372	1265	1309	1971	1816	2153
1234	ENSG00000182768	263.433	-0.873753	0.186949	-4.67376	2.95742e-06	3.72649e-05	NGRN	51335	6.18949e-05	343	390	288	204	174	181
1235	ENSG00000113456	111.282	-1.10096	0.235679	-4.67144	2.99098e-06	3.76573e-05	RAD1	5810	6.25466e-05	157	149	152	68	81	60
1236	ENSG00000005243	32.9689	1.84774	0.395612	4.6706	3.00321e-06	3.77807e-05	COPZ2	51226	6.27516e-05	13	11	19	63	47	45
1237	ENSG00000118418	527.654	0.876571	0.187691	4.6703	3.00765e-06	3.78059e-05	HMGN3	9324	6.27934e-05	352	338	421	729	497	829
1238	ENSG00000130255	2999.02	0.685871	0.146905	4.66881	3.02952e-06	3.80501e-05	RPL36	25873	6.3199e-05	2145	2497	2249	3938	2976	4188
1239	ENSG00000164125	19.9104	2.50226	0.536176	4.66685	3.05849e-06	3.8371e-05	FAM198B	51313	6.37321e-05	4	4	9	26	28	48
1240	ENSG00000100316	14661.5	0.673521	0.144326	4.66666	3.06142e-06	3.8371e-05	RPL3	6122	6.37321e-05	10846	11138	11910	19547	14238	20291
1241	ENSG00000128165	41.0166	-2.38202	0.510441	-4.66658	3.06248e-06	3.8371e-05	ADM2	79924	6.37321e-05	38	45	123	7	13	20
1242	ENSG00000168273	93.2429	1.32347	0.283682	4.66534	3.08112e-06	3.85735e-05	SMIM4	440957	6.40684e-05	42	60	56	159	87	156
1243	ENSG00000169855	286.567	-0.823893	0.176635	-4.66439	3.09541e-06	3.87035e-05	ROBO1	6091	6.42843e-05	336	401	360	178	212	232
1244	ENSG00000127540	227.078	0.976526	0.209361	4.66431	3.09648e-06	3.87035e-05	UQCR11	10975	6.42843e-05	128	162	166	340	224	343
1245	ENSG00000149554	152.639	-0.999195	0.214289	-4.66284	3.11882e-06	3.89282e-05	CHEK1	1111	6.46576e-05	219	211	184	105	114	83
1246	ENSG00000173218	151.263	-1.05781	0.226862	-4.66279	3.11947e-06	3.89282e-05	VANGL1	81839	6.46576e-05	219	217	177	72	108	116
1247	ENSG00000067704	794.563	-0.739305	0.158601	-4.66141	3.1405e-06	3.91593e-05	IARS2	55699	6.50414e-05	1055	968	969	624	691	461
1248	ENSG00000099942	364.657	-0.735682	0.157966	-4.6572	3.20535e-06	3.99359e-05	CRKL	1399	6.63313e-05	430	490	449	262	286	272
1249	ENSG00000114125	456.132	0.759507	0.16312	4.65613	3.22208e-06	4.01122e-05	RNF7	9616	6.6624e-05	295	336	383	537	531	655
1250	ENSG00000035681	155.791	-0.97429	0.209324	-4.65446	3.24825e-06	4.04057e-05	NSMAF	8439	6.71115e-05	207	219	195	89	116	108
1251	ENSG00000180581	404.203	-0.750198	0.161246	-4.65251	3.27911e-06	4.07569e-05	SRP9P1	NA	6.76949e-05	510	500	518	317	333	247
1252	ENSG00000183696	102.959	-1.14392	0.245974	-4.65055	3.31048e-06	4.11139e-05	UPP1	7378	6.82879e-05	131	150	144	77	58	58
1253	ENSG00000079246	2682.53	-0.573419	0.123309	-4.65025	3.31534e-06	4.11414e-05	XRCC5	7520	6.83336e-05	3250	3078	3303	2328	2201	1934
1254	ENSG00000149483	279.873	0.78348	0.168491	4.64999	3.31947e-06	4.11598e-05	TMEM138	51524	6.83641e-05	212	200	205	403	330	330
1255	ENSG00000120705	1321.66	-0.659015	0.141729	-4.64982	3.32227e-06	4.11618e-05	ETF1	2107	6.83673e-05	1703	1639	1523	1006	1180	879
1256	ENSG00000101972	333.408	-0.901223	0.193917	-4.64747	3.36039e-06	4.15946e-05	STAG2	10735	6.90862e-05	457	412	443	194	304	191
1257	ENSG00000168906	662.966	-0.809664	0.174221	-4.64733	3.36256e-06	4.15946e-05	MAT2A	4144	6.90862e-05	774	1014	753	483	564	390
1258	ENSG00000142178	722.46	-0.70886	0.152591	-4.6455	3.39253e-06	4.1932e-05	SIK1	150094	6.96467e-05	867	1012	812	476	591	577
1259	ENSG00000225733	391.206	-0.745803	0.160568	-4.64478	3.40437e-06	4.20449e-05	FGD5-AS1	100505641	6.98342e-05	513	521	439	309	301	264
1260	ENSG00000141424	198.709	-1.06842	0.230039	-4.64451	3.40882e-06	4.20665e-05	SLC39A6	25800	6.98701e-05	323	244	248	112	170	96
1261	ENSG00000143543	250.345	0.822357	0.177159	4.6419	3.45212e-06	4.2567e-05	JTB	10899	7.07014e-05	188	164	189	349	280	332
1262	ENSG00000005206	136.278	1.00496	0.216605	4.63961	3.49075e-06	4.30092e-05	SPPL2B	56928	7.14358e-05	90	75	106	180	173	194
1263	ENSG00000088832	2678.93	0.610076	0.131512	4.63894	3.50198e-06	4.31135e-05	FKBP1A	102465524	7.1609e-05	2141	2025	2203	3136	3698	2871
1264	ENSG00000149435	30.7274	1.84046	0.396932	4.6367	3.54011e-06	4.35484e-05	GGTLC1	92086	7.23314e-05	11	14	15	44	43	58
1265	ENSG00000250568	93.8693	1.16515	0.251305	4.63641	3.54509e-06	4.35752e-05	RP11-333E13.2	NA	7.23759e-05	52	70	52	147	113	131
1266	ENSG00000136381	386.571	-0.941502	0.203141	-4.63473	3.57407e-06	4.38967e-05	IREB2	3658	7.29099e-05	560	512	464	256	349	179
1267	ENSG00000109819	232.422	-0.970149	0.209413	-4.63272	3.609e-06	4.42907e-05	PPARGC1A	10891	7.35643e-05	331	256	343	155	191	118
1268	ENSG00000154319	154.127	-0.947354	0.204529	-4.63187	3.6237e-06	4.4436e-05	FAM167A	83648	7.38057e-05	202	203	206	108	112	93
1269	ENSG00000198056	45.0964	-1.74001	0.375778	-4.63041	3.64944e-06	4.46971e-05	PRIM1	5557	7.42394e-05	62	76	74	17	29	13
1270	ENSG00000127920	1058.35	0.701297	0.151457	4.63034	3.65074e-06	4.46971e-05	GNG11	2791	7.42394e-05	747	863	810	1554	1285	1090
1271	ENSG00000106070	222.802	-0.940251	0.203154	-4.62826	3.68747e-06	4.51113e-05	GRB10	2887	7.49273e-05	240	309	333	136	175	144
1272	ENSG00000008394	3169.59	0.640358	0.138418	4.62626	3.72321e-06	4.54433e-05	MGST1	4257	7.54786e-05	2423	2180	2832	4238	3871	3473
1273	ENSG00000096717	102.651	-1.24823	0.269815	-4.62626	3.72335e-06	4.54433e-05	SIRT1	23411	7.54786e-05	151	124	161	38	74	68
1274	ENSG00000130826	700.25	-0.645197	0.139464	-4.62625	3.72337e-06	4.54433e-05	DKC1	100847052	7.54786e-05	826	884	856	590	559	486
1275	ENSG00000159720	630.923	0.67637	0.146213	4.62592	3.72938e-06	4.54809e-05	ATP6V0D1	9114	7.55411e-05	535	439	482	849	732	748
1276	ENSG00000156253	147.092	1.04836	0.226638	4.62573	3.73286e-06	4.54877e-05	RWDD2B	10069	7.55524e-05	74	92	123	208	202	184
1277	ENSG00000102900	416.2	-0.814865	0.176221	-4.6241	3.76225e-06	4.58099e-05	NUP93	9688	7.60876e-05	541	625	426	317	291	297
1278	ENSG00000106367	590.84	0.665276	0.143885	4.62367	3.77003e-06	4.58687e-05	AP1S1	1174	7.61853e-05	457	480	431	726	657	796
1279	ENSG00000247774	44.1672	1.58765	0.343414	4.62312	3.78013e-06	4.59556e-05	PCED1B-AS1	100233209	7.63296e-05	19	24	22	75	49	76
1280	ENSG00000243829	87.8016	1.69356	0.366756	4.61769	3.88036e-06	4.71373e-05	CTB-33G10.1	NA	7.82924e-05	28	56	38	145	58	201
1281	ENSG00000177700	2531.88	0.681723	0.147642	4.6174	3.88571e-06	4.71654e-05	POLR2L	5441	7.8339e-05	2066	2070	1693	3527	2589	3246
1282	ENSG00000054523	239.141	-0.914877	0.198167	-4.61671	3.89879e-06	4.72872e-05	KIF1B	23095	7.85414e-05	360	298	286	169	194	128
1283	ENSG00000108559	467.224	-0.682959	0.148011	-4.61426	3.94499e-06	4.78103e-05	NUP88	4927	7.94102e-05	594	564	573	368	379	325
1284	ENSG00000130733	119.751	1.01663	0.22036	4.61347	3.9601e-06	4.7956e-05	YIPF2	78992	7.96522e-05	83	82	74	166	177	136
1285	ENSG00000157657	167.818	-0.911113	0.197565	-4.6117	3.9938e-06	4.83265e-05	ZNF618	114991	8.02676e-05	226	220	213	110	123	116
1286	ENSG00000168802	446.848	-0.728581	0.158179	-4.60604	4.1041e-06	4.96226e-05	CHTF8	54921	8.24203e-05	596	573	501	375	311	325
1287	ENSG00000047249	190.98	0.868571	0.188614	4.60502	4.12432e-06	4.98283e-05	ATP6V1H	51606	8.27619e-05	135	139	134	237	281	219
1288	ENSG00000136982	46.2228	-1.74559	0.379196	-4.60341	4.15627e-06	5.01753e-05	DSCC1	79075	8.33383e-05	79	85	51	23	24	15
1289	ENSG00000169627	822.843	0.77929	0.1693	4.60302	4.16402e-06	5.02299e-05	BOLA2B	107984053	8.3429e-05	581	646	586	1244	785	1096
1290	ENSG00000126432	2558.16	0.697464	0.15161	4.60039	4.21691e-06	5.08284e-05	PRDX5	25824	8.44231e-05	1945	1760	2144	3450	2519	3531
1291	ENSG00000228288	26.1404	2.33486	0.507595	4.59985	4.22791e-06	5.09215e-05	PCAT6	100506696	8.45778e-05	10	4	11	23	36	73
1292	ENSG00000128692	411.533	-0.762482	0.165812	-4.59848	4.25575e-06	5.11858e-05	EIF2S2P4	NA	8.50167e-05	471	480	604	319	310	285
1293	ENSG00000182117	1256.44	0.651161	0.141604	4.59845	4.25643e-06	5.11858e-05	NOP10	55505	8.50167e-05	889	995	1044	1606	1317	1687
1294	ENSG00000131023	70.5425	-1.32833	0.288879	-4.59823	4.26104e-06	5.1188e-05	LATS1	9113	8.50204e-05	114	95	94	37	43	40
1295	ENSG00000163898	176.42	0.950277	0.206666	4.59812	4.2632e-06	5.1188e-05	LIPH	200879	8.50204e-05	139	94	129	241	242	214
1296	ENSG00000254285	3640.71	0.710311	0.154603	4.59443	4.33943e-06	5.20512e-05	KRT8P3	NA	8.64541e-05	2902	3000	2378	4770	3606	5188
1297	ENSG00000066117	561.907	-0.666549	0.145081	-4.59431	4.34179e-06	5.20512e-05	SMARCD1	6602	8.64541e-05	687	678	702	487	407	411
1298	ENSG00000157212	56.226	-1.55348	0.338265	-4.59249	4.37979e-06	5.24663e-05	PAXIP1	22976	8.71436e-05	95	90	68	19	35	30
1299	ENSG00000181938	87.435	-1.1879	0.258726	-4.59134	4.40411e-06	5.27171e-05	GINS3	64785	8.756e-05	119	131	116	49	57	53
1300	ENSG00000074527	128.254	1.15756	0.252243	4.58906	4.45242e-06	5.325e-05	NTN4	59277	8.84452e-05	64	94	83	133	230	166
1301	ENSG00000143970	177.283	-0.934354	0.203611	-4.58891	4.45567e-06	5.325e-05	ASXL2	55252	8.84452e-05	241	247	215	117	141	103
1302	ENSG00000142327	731.834	0.615349	0.134099	4.58875	4.45899e-06	5.325e-05	RNPEPL1	NA	8.84452e-05	604	548	579	877	840	942
1303	ENSG00000164050	274.332	0.950464	0.207136	4.5886	4.46233e-06	5.325e-05	PLXNB1	5364	8.84452e-05	228	173	156	295	332	461
1304	ENSG00000141349	729.159	0.733516	0.159885	4.58778	4.47995e-06	5.34193e-05	G6PC3	92579	8.87264e-05	553	503	580	952	730	1055
1305	ENSG00000140564	631.477	-0.735638	0.160414	-4.58586	4.52126e-06	5.38705e-05	FURIN	5045	8.94759e-05	771	725	863	471	398	562
1306	ENSG00000100983	773.232	0.708166	0.154529	4.58273	4.58952e-06	5.46419e-05	GSS	2937	9.07571e-05	565	601	591	1101	777	1005
1307	ENSG00000160867	672.579	-0.769782	0.167986	-4.58242	4.5962e-06	5.46797e-05	FGFR4	2264	9.08198e-05	913	877	745	528	393	579
1308	ENSG00000224051	222.145	0.857153	0.187071	4.58196	4.60643e-06	5.47554e-05	CPTP	80772	9.09456e-05	161	175	137	326	266	267
1309	ENSG00000145386	182.244	-2.3599	0.515058	-4.58181	4.60961e-06	5.47554e-05	CCNA2	890	9.09456e-05	342	336	241	52	97	25
1310	ENSG00000127184	2425.1	0.616234	0.134504	4.58153	4.61593e-06	5.47886e-05	COX7C	100500805	9.10008e-05	1903	1670	2174	3101	2950	2753
1311	ENSG00000105427	97.7751	1.19901	0.261748	4.58078	4.63253e-06	5.49182e-05	CNFN	84518	9.12159e-05	55	53	68	157	98	156
1312	ENSG00000116199	358.7	-0.82611	0.180345	-4.58071	4.63391e-06	5.49182e-05	FAM20B	9917	9.12159e-05	532	451	399	263	293	214
1313	ENSG00000007384	98.978	1.12662	0.246032	4.57915	4.66874e-06	5.52889e-05	RHBDF1	64285	9.18317e-05	57	76	52	140	123	146
1314	ENSG00000167635	771.377	-0.762777	0.166649	-4.57716	4.71336e-06	5.57748e-05	ZNF146	7705	9.26388e-05	923	915	1085	572	688	446
1315	ENSG00000188986	239.635	-0.874382	0.19114	-4.57456	4.77221e-06	5.63911e-05	NELFB	25920	9.36624e-05	319	355	256	169	168	171
1316	ENSG00000196954	168.692	1.03162	0.225514	4.57454	4.7727e-06	5.63911e-05	CASP4	837	9.36624e-05	91	99	141	244	185	252
1317	ENSG00000100522	245.824	-0.914883	0.20004	-4.57351	4.79628e-06	5.66267e-05	GNPNAT1	64841	9.40538e-05	348	304	320	174	208	121
1318	ENSG00000125734	427.332	0.749606	0.164007	4.57057	4.86392e-06	5.73817e-05	GPR108	102465474	9.53077e-05	322	310	319	542	443	627
1319	ENSG00000066248	58.6367	-1.44965	0.317187	-4.57033	4.86955e-06	5.74046e-05	NGEF	25791	9.53457e-05	77	100	81	31	32	30
1320	ENSG00000223803	68.357	1.94002	0.42463	4.56874	4.90671e-06	5.77794e-05	RPS20P14	NA	9.59684e-05	33	23	27	122	31	174
1321	ENSG00000196367	450.294	-0.795051	0.174023	-4.56865	4.90878e-06	5.77794e-05	TRRAP	8295	9.59684e-05	620	598	502	281	396	305
1322	ENSG00000096746	412.073	-0.753413	0.164922	-4.56829	4.91717e-06	5.78344e-05	HNRNPH3	3189	9.60596e-05	516	559	470	283	281	363
1323	ENSG00000175866	77.5074	1.27399	0.278917	4.56765	4.93227e-06	5.79682e-05	BAIAP2	10458	9.62819e-05	39	60	36	98	108	123
1324	ENSG00000224631	147.836	1.42277	0.311524	4.56713	4.94443e-06	5.80672e-05	RPS27AP16	NA	9.64463e-05	88	83	67	208	102	340
1325	ENSG00000234498	33.3876	1.8999	0.416082	4.56615	4.96752e-06	5.82929e-05	RPL13AP20	387841	9.68211e-05	17	13	11	51	33	76
1326	ENSG00000087460	5675.89	0.629669	0.137906	4.56591	4.97321e-06	5.82929e-05	GNAS	2778	9.68211e-05	4389	4045	4930	7268	5850	7573
1327	ENSG00000179344	8.71243	6.24781	1.36838	4.56584	4.97489e-06	5.82929e-05	HLA-DQB1	3119	9.68211e-05	1	0	0	7	17	28
1328	ENSG00000167608	54.8498	1.62401	0.355765	4.56485	4.99861e-06	5.85267e-05	TMC4	147798	9.72095e-05	27	19	32	75	52	123
1329	ENSG00000187555	921.132	-0.620413	0.135932	-4.56413	5.01569e-06	5.86824e-05	USP7	7874	9.74681e-05	1195	1122	1037	729	777	667
1330	ENSG00000125746	371.889	0.868633	0.190341	4.56356	5.02939e-06	5.87985e-05	EML2	442902	9.76609e-05	251	245	288	488	359	599
1331	ENSG00000266028	116.543	-1.08305	0.237447	-4.56124	5.08521e-06	5.94064e-05	SRGAP2	23380	9.86706e-05	158	181	136	68	78	78
1332	ENSG00000162174	179.18	0.985802	0.216144	4.56085	5.09477e-06	5.94734e-05	ASRGL1	80150	9.87819e-05	122	110	125	256	175	287
1333	ENSG00000063854	221.186	0.855554	0.187605	4.56041	5.10534e-06	5.9552e-05	HAGH	3029	9.89125e-05	153	151	165	303	235	320
1334	ENSG00000108021	304.467	-0.871001	0.191215	-4.55509	5.23629e-06	6.10338e-05	FAM208B	54906	0.000101374	417	418	353	185	270	184
1335	ENSG00000126088	174.714	0.884998	0.19442	4.55198	5.31433e-06	6.1897e-05	UROD	7389	0.000102807	111	124	134	251	224	204
1336	ENSG00000118849	240.363	1.03601	0.227798	4.54793	5.41771e-06	6.30538e-05	RARRES1	5918	0.000104729	153	122	199	424	300	244
1337	ENSG00000174444	29380.1	0.615316	0.135303	4.54771	5.42335e-06	6.30723e-05	RPL4	6124	0.00010476	22233	22121	25264	37571	29739	39353
1338	ENSG00000215301	1043.69	-0.911732	0.200496	-4.54737	5.43196e-06	6.31252e-05	DDX3X	1654	0.000104847	1392	1633	1074	652	967	544
1339	ENSG00000159921	330.476	-0.800112	0.175967	-4.54694	5.44303e-06	6.32066e-05	GNE	10020	0.000104983	454	382	430	260	266	191
1340	ENSG00000127663	119.113	1.16056	0.255321	4.54549	5.48081e-06	6.35978e-05	KDM4B	23030	0.000105632	77	78	64	113	156	227
1341	ENSG00000198055	286.399	-0.865422	0.190464	-4.54376	5.52606e-06	6.40752e-05	GRK6	2870	0.000106425	378	409	317	216	165	234
1342	ENSG00000160691	1089.33	0.613904	0.135137	4.54283	5.5504e-06	6.43094e-05	SHC1	6464	0.000106814	891	934	757	1278	1294	1383
1343	ENSG00000000460	42.362	-1.75074	0.385601	-4.5403	5.61748e-06	6.50381e-05	C1orf112	55732	0.000108025	75	73	50	19	22	15
1344	ENSG00000169403	16.4981	2.56561	0.565274	4.5387	5.66019e-06	6.54662e-05	PTAFR	5724	0.000108736	5	6	3	31	23	30
1345	ENSG00000124172	2032.28	0.697862	0.153762	4.5386	5.66287e-06	6.54662e-05	ATP5E	514	0.000108736	1490	1386	1778	2923	2549	2068
1346	ENSG00000147003	9.21224	5.49273	1.21029	4.53835	5.66969e-06	6.54963e-05	TMEM27	57393	0.000108786	1	0	0	21	21	13
1347	ENSG00000029363	690.348	-0.698648	0.15399	-4.53696	5.70719e-06	6.58471e-05	BCLAF1	9774	0.000109368	940	810	820	532	598	441
1348	ENSG00000144579	309.507	-0.736659	0.16237	-4.53691	5.70853e-06	6.58471e-05	CTDSP1	58190	0.000109368	377	380	403	246	228	222
1349	ENSG00000263639	13.2436	3.12914	0.689763	4.53655	5.71816e-06	6.58923e-05	MSMB	4477	0.000109443	2	1	5	37	17	18
1350	ENSG00000140950	231.86	0.811277	0.178835	4.53645	5.72092e-06	6.58923e-05	TLDC1	57707	0.000109443	175	181	152	288	324	272
1351	ENSG00000130762	178.018	-0.933681	0.205843	-4.53588	5.73635e-06	6.60211e-05	ARHGEF16	27237	0.000109657	248	245	204	133	105	133
1352	ENSG00000123219	50.1679	-1.59956	0.352914	-4.53242	5.8311e-06	6.7062e-05	CENPK	64105	0.000111386	86	77	66	17	32	23
1353	ENSG00000070404	1071.5	0.72768	0.160561	4.53212	5.83954e-06	6.71094e-05	FSTL3	10272	0.000111465	872	927	621	1251	1351	1408
1354	ENSG00000153107	252.221	-0.892782	0.197003	-4.53183	5.84758e-06	6.71255e-05	ANAPC1	64682	0.000111492	354	363	272	167	206	151
1355	ENSG00000129625	948.139	0.572233	0.126272	4.53175	5.84958e-06	6.71255e-05	REEP5	7905	0.000111492	798	727	762	1153	1132	1116
1356	ENSG00000181555	247.212	-0.797265	0.175936	-4.53155	5.85529e-06	6.71415e-05	SETD2	29072	0.000111518	331	319	292	194	175	174
1357	ENSG00000117155	85.9442	-1.21232	0.267605	-4.53024	5.89174e-06	6.75097e-05	SSX2IP	117178	0.00011213	125	119	120	45	64	43
1358	ENSG00000137124	593.362	0.803616	0.177439	4.52898	5.92686e-06	6.78621e-05	ALDH1B1	219	0.000112715	444	527	328	731	831	700
1359	ENSG00000132405	96.7846	-1.25067	0.276188	-4.52835	5.9445e-06	6.8014e-05	TBC1D14	57533	0.000112967	156	153	104	63	65	40
1360	ENSG00000225200	136.424	1.36687	0.301887	4.52774	5.96165e-06	6.816e-05	AB019441.29	NA	0.00011321	69	78	79	215	94	285
1361	ENSG00000180921	1066.74	0.707623	0.156328	4.52653	5.99592e-06	6.85015e-05	FAM83H	286077	0.000113777	889	893	648	1181	1374	1415
1362	ENSG00000186907	917.846	0.793589	0.175358	4.52553	6.02436e-06	6.87759e-05	RTN4RL2	349667	0.000114233	611	876	529	1144	1214	1133
1363	ENSG00000033100	224.17	0.899972	0.198885	4.52508	6.03721e-06	6.8872e-05	CHPF2	768213	0.000114392	176	169	125	249	331	295
1364	ENSG00000167258	349.081	-0.847283	0.187393	-4.52142	6.14266e-06	7.00236e-05	CDK12	51755	0.000116305	482	480	392	251	300	189
1365	ENSG00000165209	128.806	-1.00293	0.221894	-4.51983	6.18882e-06	7.04981e-05	STRBP	55342	0.000117093	177	169	173	78	98	78
1366	ENSG00000155959	274.411	-0.868597	0.192416	-4.51417	6.35662e-06	7.23456e-05	VBP1	7411	0.000120162	370	333	369	181	242	151
1367	ENSG00000132182	801.059	-0.718838	0.159245	-4.51404	6.36031e-06	7.23456e-05	NUP210	23225	0.000120162	1097	1100	794	576	631	609
1368	ENSG00000174791	91.14	1.11227	0.246431	4.51351	6.37641e-06	7.24758e-05	RIN1	9610	0.000120378	49	63	62	126	136	111
1369	ENSG00000188735	169.238	0.893725	0.198239	4.50831	6.53454e-06	7.42188e-05	TMEM120B	144404	0.000123273	109	118	127	235	190	237
1370	ENSG00000244086	195.699	0.886645	0.196717	4.50722	6.56835e-06	7.45055e-05	RPS20P35	NA	0.000123749	129	121	160	239	233	292
1371	ENSG00000189057	84.6758	-1.62541	0.360627	-4.50718	6.56936e-06	7.45055e-05	FAM111B	374393	0.000123749	169	142	78	35	64	20
1372	ENSG00000108349	400.797	-0.685803	0.152204	-4.50582	6.61163e-06	7.49302e-05	CASC3	102466986	0.000124455	463	502	517	303	306	312
1373	ENSG00000181830	370.799	0.683745	0.151803	4.50417	6.66328e-06	7.54605e-05	SLC35C1	55343	0.000125336	303	281	270	466	464	441
1374	ENSG00000143164	378.309	-0.763461	0.169521	-4.50365	6.67961e-06	7.55905e-05	DCAF6	55827	0.000125551	508	402	521	277	299	262
1375	ENSG00000213300	245.062	-0.813133	0.180642	-4.50135	6.75247e-06	7.63594e-05	HNRNPA3P6	NA	0.000126829	291	313	328	174	159	204
1376	ENSG00000164323	114.784	-1.05787	0.235025	-4.50112	6.7597e-06	7.63856e-05	CFAP97	57587	0.000126872	164	156	149	73	86	60
1377	ENSG00000166411	400.574	-0.752653	0.16727	-4.49964	6.80699e-06	7.68642e-05	IDH3A	3419	0.000127667	569	458	485	326	311	254
1378	ENSG00000179163	115.033	1.03494	0.230301	4.49388	6.99387e-06	7.8917e-05	FUCA1	2517	0.000131077	72	66	89	176	149	139
1379	ENSG00000185624	7413.84	0.577568	0.12854	4.49329	7.013e-06	7.90756e-05	P4HB	5034	0.00013134	6449	5692	5700	8730	7929	9983
1380	ENSG00000173660	1774.03	0.697201	0.155188	4.49261	7.03546e-06	7.92713e-05	UQCRH	7388	0.000131665	1332	1179	1544	2386	1787	2415
1381	ENSG00000146677	146.145	1.44975	0.322765	4.49167	7.06677e-06	7.95664e-05	AC004453.8	NA	0.000132155	82	67	83	242	88	315
1382	ENSG00000129354	569.311	0.633154	0.140986	4.4909	7.09214e-06	7.97836e-05	AP1M2	10053	0.000132516	451	466	419	685	651	743
1383	ENSG00000183814	35.8861	-1.82223	0.405771	-4.49078	7.09633e-06	7.97836e-05	LIN9	286826	0.000132516	52	64	53	16	18	13
1384	ENSG00000198752	780.935	-0.610448	0.135948	-4.49029	7.11247e-06	7.99074e-05	CDC42BPB	9578	0.000132722	973	997	862	612	632	609
1385	ENSG00000165097	87.4018	-1.19746	0.266867	-4.48711	7.21961e-06	8.10525e-05	KDM1B	221656	0.000134624	114	138	110	52	47	63
1386	ENSG00000178057	360.537	0.729542	0.162628	4.48594	7.25917e-06	8.14378e-05	NDUFAF3	25915	0.000135264	266	289	257	509	399	443
1387	ENSG00000138356	12.0339	3.59493	0.801692	4.48418	7.3194e-06	8.20543e-05	AOX1	316	0.000136287	0	4	2	10	36	20
1388	ENSG00000106290	226.893	-0.850206	0.189681	-4.48228	7.38482e-06	8.27281e-05	TAF6	6878	0.000137407	285	330	260	181	151	154
1389	ENSG00000104635	594.304	-0.747525	0.166975	-4.47688	7.57416e-06	8.47881e-05	SLC39A14	23516	0.000140828	770	778	694	370	546	408
1390	ENSG00000184076	1179.09	0.639839	0.142926	4.47671	7.5803e-06	8.47958e-05	UQCR10	29796	0.000140841	844	880	1040	1601	1289	1420
1391	ENSG00000178719	1068.94	0.562377	0.125634	4.47632	7.59424e-06	8.48411e-05	GRINA	2907	0.000140916	852	899	837	1333	1211	1282
1392	ENSG00000130935	250.832	-0.960114	0.214489	-4.47629	7.59527e-06	8.48411e-05	NOL11	25926	0.000140916	337	332	335	152	231	118
1393	ENSG00000157500	108.274	-1.10495	0.246855	-4.4761	7.60191e-06	8.48543e-05	APPL1	26060	0.000140938	171	147	128	66	77	60
1394	ENSG00000111229	1672.41	0.695442	0.15543	4.4743	7.66611e-06	8.55096e-05	ARPC3	10094	0.000142027	1189	1075	1569	2229	2081	1891
1395	ENSG00000107819	189.144	0.856032	0.191335	4.474	7.6771e-06	8.55708e-05	SFXN3	81855	0.000142128	146	143	115	228	251	252
1396	ENSG00000155252	129.689	0.940193	0.210214	4.47255	7.72926e-06	8.60905e-05	PI4K2A	55361	0.000142991	82	94	89	181	159	171
1397	ENSG00000119285	407.306	-0.72419	0.161991	-4.47056	7.80168e-06	8.68349e-05	HEATR1	55127	0.000144228	511	545	472	312	341	262
1398	ENSG00000153560	273.855	-0.842782	0.188612	-4.46835	7.88266e-06	8.76735e-05	UBP1	7342	0.000145621	370	381	311	192	231	159
1399	ENSG00000117834	24.9472	2.03095	0.454788	4.46571	7.98049e-06	8.86981e-05	SLC5A9	200010	0.000147323	13	8	9	40	30	50
1400	ENSG00000136542	144.666	1.05401	0.236046	4.46528	7.99656e-06	8.88132e-05	GALNT5	11227	0.000147514	119	76	89	188	237	159
1401	ENSG00000122862	234.417	0.762161	0.170764	4.46323	8.07321e-06	8.96005e-05	SRGN	5552	0.000148821	181	174	166	303	285	297
1402	ENSG00000253683	184.437	0.891061	0.1998	4.45976	8.2053e-06	9.09551e-05	CTB-79E8.3	NA	0.000151071	116	127	142	230	207	285
1403	ENSG00000137106	969.236	0.608584	0.136463	4.45971	8.20696e-06	9.09551e-05	GRHPR	9380	0.000151071	788	753	757	1249	1021	1247
1404	ENSG00000162643	8.98092	5.37356	1.2061	4.4553	8.37766e-06	9.27808e-05	WDR63	126820	0.000154104	1	0	1	17	13	23
1405	ENSG00000095002	142.075	-1.15776	0.260006	-4.4528	8.47561e-06	9.37988e-05	MSH2	4436	0.000155794	227	220	146	72	116	71
1406	ENSG00000085662	6537.02	0.558971	0.125537	4.45263	8.4824e-06	9.38072e-05	AKR1B1	231	0.000155808	5057	5847	4953	8508	7231	7626
1407	ENSG00000127334	66.1443	-1.3705	0.307885	-4.45133	8.53386e-06	9.43092e-05	DYRK2	8445	0.000156642	102	106	81	30	46	33
1408	ENSG00000136504	271.958	-0.798256	0.179343	-4.451	8.5472e-06	9.43895e-05	KAT7	11143	0.000156776	343	313	382	225	195	174
1409	ENSG00000172428	354.269	0.724286	0.162902	4.44614	8.74285e-06	9.6439e-05	COPS9	150678	0.00016018	258	271	274	513	420	390
1410	ENSG00000205078	27.7118	2.01221	0.45258	4.44608	8.74519e-06	9.6439e-05	SYCE1L	100130958	0.00016018	11	13	8	40	29	65
1411	ENSG00000122912	71.8114	1.20893	0.271955	4.44534	8.77541e-06	9.6672e-05	SLC25A16	8034	0.000160567	43	46	42	96	120	83
1412	ENSG00000275234	89.4349	1.19732	0.269348	4.44526	8.77876e-06	9.6672e-05	CTD-2396E7.11	NA	0.000160567	55	40	68	141	105	128
1413	ENSG00000131171	190.225	0.899826	0.202435	4.44502	8.78847e-06	9.67105e-05	SH3BGRL	6451	0.000160631	122	112	164	262	242	239
1414	ENSG00000138587	23.7713	-2.33705	0.526019	-4.4429	8.87529e-06	9.75968e-05	MNS1	55329	0.000162103	37	36	46	5	10	8
1415	ENSG00000021574	77.0938	-1.29084	0.290557	-4.44263	8.8865e-06	9.7651e-05	SPAST	6683	0.000162193	113	111	109	37	60	33
1416	ENSG00000137216	288.14	0.714606	0.161059	4.43691	9.12586e-06	0.00010021	TMEM63B	55362	0.000166444	218	213	222	375	338	363
1417	ENSG00000204379	685.219	0.776952	0.175161	4.43564	9.17998e-06	0.000100629	XAGE1A	653220	0.00016714	432	483	595	879	694	1028
1418	ENSG00000204382	685.219	0.776952	0.175161	4.43564	9.17998e-06	0.000100629	XAGE1B	653220	0.00016714	432	483	595	879	694	1028
1419	ENSG00000109083	172.982	0.88129	0.198688	4.43556	9.18343e-06	0.000100629	IFT20	90410	0.00016714	116	107	141	222	211	242
1420	ENSG00000170836	102.682	1.14134	0.25738	4.43446	9.23048e-06	0.000101033	PPM1D	8493	0.000167811	72	49	69	124	121	181
1421	ENSG00000136758	1014.95	-0.699837	0.15782	-4.43439	9.23329e-06	0.000101033	YME1L1	10730	0.000167811	1295	1157	1328	785	916	609
1422	ENSG00000237975	8.44961	4.75767	1.07326	4.43292	9.29674e-06	0.000101656	FLG-AS1	339400	0.000168845	1	1	0	10	23	15
1423	ENSG00000244245	48.9725	1.48685	0.335596	4.43047	9.4029e-06	0.000102745	RP11-120B7.1	NA	0.000170653	20	36	21	70	69	78
1424	ENSG00000182871	454.122	0.782891	0.176736	4.42971	9.4359e-06	0.000103033	COL18A1	80781	0.000171132	361	374	264	518	538	670
1425	ENSG00000173545	309.751	0.781968	0.176732	4.42461	9.66156e-06	0.000105423	ZNF622	90441	0.000175101	223	207	249	405	326	448
1426	ENSG00000007306	21.8476	2.48324	0.56137	4.42354	9.70958e-06	0.000105873	CEACAM7	1087	0.000175848	10	1	8	47	24	40
1427	ENSG00000136636	465.249	-0.653865	0.147828	-4.42315	9.72702e-06	0.000105988	KCTD3	51133	0.000176041	600	559	551	372	375	335
1428	ENSG00000125726	12.2999	3.0341	0.686129	4.42206	9.77647e-06	0.000106453	CD70	970	0.000176812	3	4	1	14	24	28
1429	ENSG00000117528	286.153	-0.937502	0.212024	-4.42168	9.79374e-06	0.000106566	ABCD3	5825	0.000177	462	340	334	176	252	154
1430	ENSG00000138758	328.45	-0.77501	0.175369	-4.41931	9.90151e-06	0.000107663	2011-09-01	55752	0.000178823	442	423	386	255	274	191
1431	ENSG00000273143	11.2978	3.27751	0.742481	4.41428	1.01349e-05	0.000110124	RP11-525A16.4	NA	0.000182909	2	1	4	23	16	23
1432	ENSG00000117308	608.506	0.683354	0.154824	4.41375	1.01594e-05	0.000110262	GALE	2582	0.000183139	475	477	443	767	624	864
1433	ENSG00000180525	37.7833	1.62941	0.36918	4.41358	1.01674e-05	0.000110262	PRR26	NA	0.000183139	21	14	21	42	66	63
1434	ENSG00000107874	488.524	0.748491	0.169589	4.41355	1.01689e-05	0.000110262	CUEDC2	79004	0.000183139	339	341	411	703	498	640
1435	ENSG00000105193	15932.3	0.610213	0.138299	4.41226	1.02298e-05	0.000110845	RPS16	6217	0.000184107	11785	12646	13399	20349	15802	21613
1436	ENSG00000197019	197.506	0.869853	0.197464	4.40511	1.05728e-05	0.000114483	SERTAD1	29950	0.000190149	120	143	153	253	219	297
1437	ENSG00000168374	1193.82	0.644713	0.146389	4.4041	1.06224e-05	0.000114939	ARF4	378	0.000190907	967	872	962	1510	1656	1196
1438	ENSG00000143367	98.9539	1.08149	0.245576	4.40391	1.06318e-05	0.000114961	TUFT1	7286	0.000190944	60	63	70	106	159	136
1439	ENSG00000004700	136.816	-1.07402	0.243908	-4.40337	1.06584e-05	0.000115169	RECQL	5965	0.000191289	217	191	151	106	94	60
1440	ENSG00000182307	393.253	-0.696391	0.158183	-4.40245	1.07036e-05	0.000115577	C8orf33	65265	0.000191967	521	503	437	293	314	292
1441	ENSG00000166794	2086.43	0.625069	0.142048	4.40041	1.08045e-05	0.000116585	PPIB	5479	0.000193642	1621	1619	1680	2991	2133	2473
1442	ENSG00000136699	399.205	-0.782789	0.177917	-4.39975	1.08378e-05	0.00011686	SMPD4	55627	0.000194098	563	539	409	262	285	337
1443	ENSG00000124226	391.769	0.689416	0.1567	4.3996	1.0845e-05	0.00011686	RNF114	55905	0.000194098	292	297	313	429	538	481
1444	ENSG00000154845	354.626	-0.753539	0.171373	-4.39706	1.09729e-05	0.000118126	PPP4R1	9989	0.0001962	496	438	407	253	302	232
1445	ENSG00000149806	2558.89	0.705649	0.160486	4.39696	1.09777e-05	0.000118126	FAU	2197	0.0001962	1949	1906	1974	3497	2346	3682
1446	ENSG00000105401	1065.92	0.588917	0.133957	4.39633	1.10095e-05	0.000118386	CDC37	100302213	0.000196633	814	902	833	1252	1171	1423
1447	ENSG00000111666	192.17	-0.96012	0.218475	-4.39464	1.10957e-05	0.000119231	CHPT1	56994	0.000198036	263	265	242	113	172	98
1448	ENSG00000138674	1112.53	0.565774	0.128759	4.39406	1.11252e-05	0.000119416	SEC31A	22872	0.000198343	927	845	921	1240	1422	1320
1449	ENSG00000127824	1235.46	0.664942	0.15133	4.394	1.11283e-05	0.000119416	TUBA4A	7277	0.000198343	955	1128	782	1491	1452	1604
1450	ENSG00000235750	72.2146	-1.22489	0.278787	-4.39364	1.11471e-05	0.000119535	KIAA0040	9674	0.000198541	106	98	99	42	43	45
1451	ENSG00000103876	305.734	0.747678	0.170274	4.39102	1.12819e-05	0.000120897	FAH	2184	0.000200804	223	233	226	434	325	393
1452	ENSG00000142528	83.1492	-1.19305	0.271727	-4.39062	1.13027e-05	0.000121037	ZNF473	25888	0.000201035	112	111	127	56	57	35
1453	ENSG00000166938	427.591	-0.681853	0.155333	-4.38962	1.13548e-05	0.000121511	DIS3L	115752	0.000201824	556	526	503	352	344	285
1454	ENSG00000213390	29.3871	-2.06491	0.4705	-4.38876	1.13997e-05	0.000121907	ARHGAP19	84986	0.000202481	46	54	40	14	7	15
1455	ENSG00000005022	3956.05	-0.570909	0.130131	-4.3872	1.14819e-05	0.000122702	SLC25A5	292	0.000203801	4922	4643	4628	3562	3255	2727
1456	ENSG00000122861	185.059	0.868245	0.198053	4.3839	1.16573e-05	0.000124466	PLAU	5328	0.000206731	118	148	127	279	224	214
1457	ENSG00000178691	149.158	-1.09959	0.250831	-4.38379	1.1663e-05	0.000124466	SUZ12	23512	0.000206731	218	218	182	98	126	53
1458	ENSG00000143549	3156.59	-0.578561	0.132043	-4.3816	1.17811e-05	0.000125641	TPM3	7170	0.000208683	3938	3861	3551	2812	2610	2168
1459	ENSG00000170298	21.4995	2.30059	0.525185	4.38053	1.18391e-05	0.000126173	LGALS9B	284194	0.000209565	6	4	11	28	27	53
1460	ENSG00000186792	61.5781	1.30962	0.299045	4.37932	1.19051e-05	0.000126789	HYAL3	8372	0.00021059	37	32	35	84	68	113
1461	ENSG00000184445	66.8376	-1.39447	0.31855	-4.37757	1.20007e-05	0.00012772	KNTC1	9735	0.000212136	110	100	85	30	51	25
1462	ENSG00000119915	33.6321	1.63643	0.37388	4.37688	1.20389e-05	0.000128039	ELOVL3	83401	0.000212666	14	18	17	45	52	55
1463	ENSG00000162714	145.797	-0.915941	0.209413	-4.37385	1.22073e-05	0.000129741	ZNF496	84838	0.000215493	185	206	181	106	99	98
1464	ENSG00000148057	37.3771	1.59438	0.364545	4.37361	1.22208e-05	0.000129796	IDNK	414328	0.000215583	18	16	21	66	45	58
1465	ENSG00000254598	140.305	-0.953463	0.218041	-4.37286	1.22627e-05	0.000130152	CSNK2A3	283106	0.000216176	197	193	168	105	101	78
1466	ENSG00000085999	21.9921	-2.55333	0.584129	-4.37118	1.23579e-05	0.00013105	RAD54L	8438	0.000217666	42	47	23	7	5	8
1467	ENSG00000048991	226.476	-0.845094	0.193338	-4.37107	1.23641e-05	0.00013105	R3HDM1	23518	0.000217666	319	314	242	167	170	146
1468	ENSG00000172292	95.4899	-1.33991	0.306602	-4.37019	1.24141e-05	0.00013149	CERS6	253782	0.000218397	157	148	113	44	82	30
1469	ENSG00000250899	41.3081	-1.72928	0.395935	-4.3676	1.2562e-05	0.000132966	RP11-253E3.3	NA	0.000220849	71	74	47	14	24	18
1470	ENSG00000198715	165.665	0.841521	0.192954	4.36126	1.29316e-05	0.000136785	GLMP	112770	0.000227191	122	119	117	220	228	189
1471	ENSG00000213930	61.8227	1.30209	0.29863	4.3602	1.29944e-05	0.000137355	GALT	2592	0.000228139	38	28	40	106	73	86
1472	ENSG00000198700	632.08	-0.644082	0.147735	-4.35971	1.30237e-05	0.000137571	IPO9	55705	0.000228498	821	823	670	497	505	476
1473	ENSG00000175166	1588.94	-0.563111	0.129182	-4.35905	1.3063e-05	0.000137893	PSMD2	5708	0.000229032	2010	1942	1729	1313	1185	1355
1474	ENSG00000023734	998.387	-0.723705	0.166054	-4.35825	1.31105e-05	0.000138301	STRAP	11171	0.00022971	1341	1221	1179	823	874	552
1475	ENSG00000026751	8.79784	4.34828	0.997871	4.35756	1.31523e-05	0.000138647	SLAMF7	57823	0.000230285	1	1	1	5	22	23
1476	ENSG00000133393	244.54	-0.785214	0.180223	-4.3569	1.31916e-05	0.000138967	FOPNL	123811	0.000230817	304	334	294	187	194	154
1477	ENSG00000109674	68.7711	-1.37123	0.314815	-4.35568	1.32653e-05	0.000139568	NEIL3	55247	0.000231814	93	100	108	24	54	33
1478	ENSG00000137486	479.928	-0.674868	0.15494	-4.35566	1.32665e-05	0.000139568	ARRB1	408	0.000231814	655	569	547	335	391	383
1479	ENSG00000214517	500.77	0.670903	0.154059	4.35485	1.33161e-05	0.000139994	PPME1	51400	0.000232522	398	382	374	574	554	723
1480	ENSG00000180182	221.423	-0.954741	0.219331	-4.35297	1.34303e-05	0.000141086	MED14	9282	0.000234336	320	323	241	150	189	106
1481	ENSG00000110063	159.374	-0.891902	0.204901	-4.35285	1.34381e-05	0.000141086	DCPS	28960	0.000234336	193	199	228	117	106	113
1482	ENSG00000178429	228.559	1.11149	0.25538	4.35232	1.34706e-05	0.000141332	RPS3AP5	NA	0.000234745	127	131	173	391	177	373
1483	ENSG00000167657	193.904	0.9062	0.208347	4.34948	1.36463e-05	0.000143054	DAPK3	693222	0.000237605	130	166	110	239	288	229
1484	ENSG00000204237	110.063	0.973777	0.223889	4.34937	1.36532e-05	0.000143054	OXLD1	339229	0.000237605	76	67	79	153	136	149
1485	ENSG00000077097	628.888	-0.665258	0.152985	-4.34851	1.37067e-05	0.000143519	TOP2B	100616477	0.000238377	778	672	864	443	498	519
1486	ENSG00000230733	148.001	0.941369	0.216509	4.34794	1.37423e-05	0.000143795	AC092171.4	NA	0.000238836	104	102	96	150	196	239
1487	ENSG00000106268	195.725	-0.850971	0.195727	-4.34775	1.37544e-05	0.000143824	NUDT1	4521	0.000238884	243	262	246	160	118	144
1488	ENSG00000175920	34.7778	1.61265	0.371183	4.34463	1.39512e-05	0.000145767	DOK7	285489	0.00024211	18	17	17	63	54	40
1489	ENSG00000111642	156.764	1.0455	0.240649	4.34451	1.39589e-05	0.000145767	CHD4	1108	0.00024211	96	89	118	192	156	290
1490	ENSG00000137818	16031	0.535172	0.123194	4.34414	1.39822e-05	0.000145912	RPLP1	6176	0.000242352	11999	14038	13233	20176	17066	19674
1491	ENSG00000204682	100.679	1.20522	0.27753	4.34267	1.40764e-05	0.000146797	CASC10	399726	0.000243822	62	82	38	148	125	149
1492	ENSG00000174165	144.964	0.948442	0.218458	4.34153	1.41497e-05	0.000147462	ZDHHC24	254359	0.000244926	88	121	89	216	187	169
1493	ENSG00000119596	544.733	-0.662271	0.152616	-4.33945	1.42839e-05	0.000148761	YLPM1	56252	0.000247083	714	706	586	434	443	385
1494	ENSG00000153048	250.12	-0.862622	0.198911	-4.33672	1.44626e-05	0.000150521	CARHSP1	23589	0.000250007	341	346	274	167	148	224
1495	ENSG00000132471	1009.65	0.556411	0.128325	4.33596	1.45126e-05	0.000150941	WBP2	23558	0.000250704	814	849	786	1158	1154	1297
1496	ENSG00000243955	26.1038	2.27474	0.525019	4.33267	1.4731e-05	0.000153091	GSTA1	2938	0.000254275	8	3	16	44	29	58
1497	ENSG00000185055	16.4396	2.41594	0.557624	4.33255	1.4739e-05	0.000153091	EFCAB10	NA	0.000254275	5	8	3	28	25	30
1498	ENSG00000148019	119.325	-1.06636	0.246195	-4.33138	1.48177e-05	0.000153805	CEP78	84131	0.000255461	184	171	132	87	83	58
1499	ENSG00000132466	399.701	-0.752619	0.173778	-4.33092	1.4849e-05	0.000153929	ANKRD17	26057	0.000255667	559	481	473	277	357	252
1500	ENSG00000089693	1685.78	0.545816	0.126028	4.33091	1.48494e-05	0.000153929	MLF2	8079	0.000255667	1315	1401	1391	1988	1826	2194
1501	ENSG00000166788	196.968	-0.855883	0.197678	-4.32968	1.49324e-05	0.000154653	SAAL1	113174	0.000256869	271	255	239	153	154	108
1502	ENSG00000159217	389.694	-0.68858	0.159041	-4.32958	1.49391e-05	0.000154653	IGF2BP1	10642	0.000256869	505	507	434	291	319	282
1503	ENSG00000176531	70.0775	1.23918	0.286298	4.32827	1.50286e-05	0.000155417	PHLDB3	653583	0.000258139	36	41	47	77	91	128
1504	ENSG00000118898	88.7366	1.17629	0.271772	4.3282	1.5033e-05	0.000155417	PPL	5493	0.000258139	45	56	62	85	128	156
1505	ENSG00000136861	282.542	-0.730815	0.168884	-4.32732	1.50937e-05	0.000155941	CDK5RAP2	55755	0.00025901	371	362	325	223	208	207
1506	ENSG00000120656	149.412	0.978329	0.226106	4.32686	1.5125e-05	0.000156161	TAF12	6883	0.000259375	84	94	123	225	162	209
1507	ENSG00000172053	1280.58	0.613609	0.141906	4.32404	1.53197e-05	0.000158066	QARS	102465536	0.000262539	1054	963	1014	1552	1318	1783
1508	ENSG00000067900	252.285	-0.915252	0.211678	-4.3238	1.53368e-05	0.000158137	ROCK1	6093	0.000262657	341	346	312	176	226	113
1509	ENSG00000119333	474.742	-0.750299	0.173536	-4.3236	1.53505e-05	0.000158175	WDR34	89891	0.000262719	629	652	498	365	297	408
1510	ENSG00000121644	200.427	-0.947521	0.219216	-4.32232	1.544e-05	0.000158991	DESI2	51029	0.000264074	252	275	274	122	182	98
1511	ENSG00000226084	37.775	1.63581	0.37877	4.31874	1.5692e-05	0.000161479	RP4-706A16.3	NA	0.000268207	20	14	21	72	40	60
1512	ENSG00000172586	379.022	0.662181	0.153358	4.31787	1.5754e-05	0.000162009	CHCHD1	118487	0.000269088	290	287	302	506	428	461
1513	ENSG00000240541	12.2206	2.9876	0.691942	4.31771	1.57657e-05	0.000162023	TM4SF1-AS1	100874091	0.000269111	2	1	5	23	20	23
1514	ENSG00000131100	967.547	0.564078	0.13065	4.31746	1.57833e-05	0.000162097	ATP6V1E1	529	0.000269233	756	754	833	1240	1107	1116
1515	ENSG00000196923	395.36	0.880803	0.204217	4.31307	1.60999e-05	0.00016524	PDLIM7	9260	0.000274454	227	366	242	405	561	572
1516	ENSG00000215114	125.483	-1.00381	0.232762	-4.3126	1.61348e-05	0.000165488	UBXN2B	137886	0.000274866	172	166	170	77	103	65
1517	ENSG00000167700	323.835	0.719793	0.166917	4.31227	1.61586e-05	0.000165623	MFSD3	113655	0.00027509	271	247	216	440	399	370
1518	ENSG00000149743	150.549	0.883766	0.204956	4.31199	1.61793e-05	0.000165638	TRPT1	83707	0.000275116	105	105	105	218	166	204
1519	ENSG00000106683	424.95	0.698402	0.161971	4.31191	1.61854e-05	0.000165638	LIMK1	3984	0.000275116	335	365	271	528	502	549
1520	ENSG00000121057	327.322	-0.796237	0.184664	-4.31181	1.61921e-05	0.000165638	AKAP1	8165	0.000275116	466	437	347	265	254	194
1521	ENSG00000158555	96.6685	1.14916	0.266611	4.31025	1.6307e-05	0.000166638	GDPD5	81544	0.000276776	78	60	42	117	140	144
1522	ENSG00000137154	16181.4	0.614211	0.142502	4.31019	1.63112e-05	0.000166638	RPS6	6194	0.000276776	11760	13235	13363	22489	15876	20364
1523	ENSG00000125835	1575.68	-0.637561	0.147925	-4.31002	1.6324e-05	0.000166659	SNRPB	6628	0.000276811	1780	2196	1773	1373	1055	1277
1524	ENSG00000250565	66.8429	-1.34408	0.311972	-4.30832	1.64499e-05	0.000167834	ATP6V1E2	90423	0.000278763	100	96	89	52	26	38
1525	ENSG00000131558	412.413	-0.654768	0.151989	-4.30799	1.64743e-05	0.000167973	EXOC4	60412	0.000278994	501	483	527	300	318	345
1526	ENSG00000131174	2589.55	0.734519	0.170626	4.30484	1.67103e-05	0.000170268	COX7B	1349	0.000282806	1832	1619	2380	3851	2622	3234
1527	ENSG00000239246	43.5142	1.78798	0.415416	4.30407	1.67686e-05	0.00017075	RP11-464D20.2	NA	0.000283606	19	14	25	80	30	93
1528	ENSG00000124207	858.76	-0.857245	0.199195	-4.30353	1.68094e-05	0.000171054	CSE1L	1434	0.00028411	1205	1184	941	612	804	405
1529	ENSG00000134827	189.625	1.19049	0.276709	4.30234	1.69006e-05	0.000171868	TCN1	6947	0.000285464	96	68	182	279	233	280
1530	ENSG00000197712	224.862	0.773861	0.179891	4.30183	1.69394e-05	0.000172151	FAM114A1	92689	0.000285933	179	175	143	279	283	290
1531	ENSG00000101343	237.653	-0.786009	0.182733	-4.30141	1.69715e-05	0.000172364	CRNKL1	51340	0.000286287	292	278	333	157	186	179
1532	ENSG00000095787	402.503	-0.681735	0.15854	-4.30008	1.70738e-05	0.00017329	WAC	51322	0.000287824	499	466	527	328	328	267
1533	ENSG00000105464	266.332	0.856425	0.199231	4.29865	1.71842e-05	0.000174297	GRIN2D	2906	0.000289497	185	194	186	262	318	453
1534	ENSG00000170889	5302.88	0.57747	0.134348	4.29833	1.72088e-05	0.000174432	RPS9	6203	0.000289722	3954	4654	4153	6849	5420	6787
1535	ENSG00000135940	1129.35	0.720376	0.167603	4.29811	1.72259e-05	0.000174492	COX5B	1329	0.000289821	804	809	941	1662	1061	1498
1536	ENSG00000174938	628.001	0.711846	0.165668	4.29683	1.73258e-05	0.00017539	SEZ6L2	26470	0.000291313	492	434	496	745	641	960
1537	ENSG00000135913	29.1748	-2.03531	0.473709	-4.29654	1.73484e-05	0.000175505	USP37	57695	0.000291503	57	48	38	10	16	5
1538	ENSG00000163072	204.89	-1.00845	0.23479	-4.29512	1.74601e-05	0.000176519	NOSTRIN	115677	0.000293188	251	206	367	148	146	111
1539	ENSG00000097046	34.7888	-1.8515	0.431261	-4.29322	1.761e-05	0.000177768	CDC7	8317	0.000295263	53	58	56	14	22	5
1540	ENSG00000176092	213.348	1.0904	0.253984	4.2932	1.76117e-05	0.000177768	AIM1L	55057	0.000295263	156	178	76	290	326	254
1541	ENSG00000184371	79.6068	1.08577	0.252909	4.29312	1.76179e-05	0.000177768	CSF1	1435	0.000295263	50	51	52	96	113	116
1542	ENSG00000130522	760.612	0.680238	0.158482	4.29222	1.76898e-05	0.000178378	JUND	3727	0.000296275	503	574	674	827	910	1075
1543	ENSG00000160294	250.787	-0.815531	0.190043	-4.2913	1.7763e-05	0.000179	MCM3AP	8888	0.000297308	337	360	264	195	185	164
1544	ENSG00000183495	398.426	-0.725898	0.169168	-4.29098	1.77885e-05	0.000179141	EP400	57634	0.000297543	474	566	453	263	337	297
1545	ENSG00000140319	1078.9	0.639356	0.149015	4.29054	1.78242e-05	0.000179384	SRP14	6727	0.000297946	811	727	991	1411	1213	1320
1546	ENSG00000214535	44.6474	1.55221	0.361859	4.28955	1.79032e-05	0.000180063	RPS15AP1	NA	0.000299075	21	23	23	63	43	96
1547	ENSG00000102384	58.3141	-1.58966	0.370617	-4.28921	1.79307e-05	0.000180222	CENPI	2491	0.000299339	93	112	62	24	43	15
1548	ENSG00000171223	205.321	-0.849797	0.198136	-4.28895	1.79521e-05	0.000180321	JUNB	3726	0.000299503	240	250	298	157	125	161
1549	ENSG00000003249	435.985	0.699553	0.163125	4.28845	1.79923e-05	0.000180608	DBNDD1	79007	0.00029998	310	386	298	563	486	572
1550	ENSG00000167642	1826.87	0.543566	0.126769	4.28786	1.80402e-05	0.00018086	SPINT2	10653	0.000300398	1490	1494	1470	2107	1975	2425
1551	ENSG00000186283	202.634	-0.828016	0.193107	-4.28786	1.80406e-05	0.00018086	TOR3A	64222	0.000300398	229	289	258	140	142	159
1552	ENSG00000054690	62.0141	1.29356	0.3018	4.28616	1.81788e-05	0.000182127	PLEKHH1	57475	0.000302503	43	40	25	94	94	76
1553	ENSG00000182372	80.4279	1.08633	0.253498	4.28535	1.82452e-05	0.000182675	CLN8	100500912	0.000303413	55	52	48	122	108	98
1554	ENSG00000123374	150.296	-1.04744	0.244654	-4.28133	1.85783e-05	0.00018589	CDK2	1017	0.000308753	205	240	169	89	128	71
1555	ENSG00000136104	108.498	-1.06168	0.248037	-4.28033	1.86614e-05	0.000186602	RNASEH2B	79621	0.000309936	151	163	131	59	85	63
1556	ENSG00000167113	240.305	0.74023	0.172986	4.27914	1.87616e-05	0.000187484	COQ4	51117	0.0003114	185	190	164	321	294	287
1557	ENSG00000153147	453.868	-0.723013	0.168977	-4.27878	1.87924e-05	0.00018767	SMARCA5	8467	0.00031171	568	528	608	338	406	275
1558	ENSG00000214110	276.8	-0.863498	0.201865	-4.27759	1.88926e-05	0.000188547	LDHAP4	NA	0.000313165	433	335	305	241	188	159
1559	ENSG00000257727	77.6528	1.13482	0.265303	4.27745	1.89044e-05	0.000188547	CNPY2	10330	0.000313165	49	53	43	120	88	113
1560	ENSG00000100519	502.609	-0.657981	0.153859	-4.27652	1.8984e-05	0.00018922	PSMC6	5706	0.000314283	614	589	649	391	437	335
1561	ENSG00000256940	12.8414	2.97594	0.696013	4.2757	1.90539e-05	0.000189794	RP11-783K16.5	NA	0.000315238	4	3	2	38	13	18
1562	ENSG00000142534	14527.5	0.632618	0.148231	4.26777	1.97434e-05	0.000196536	RPS11	6205	0.000326436	10641	10810	12721	19617	14043	19334
1563	ENSG00000141646	99.8086	-1.06907	0.250546	-4.26694	1.98169e-05	0.000197142	SMAD4	4089	0.000327442	139	142	127	51	75	65
1564	ENSG00000103187	1525.6	0.753277	0.17656	4.26642	1.98637e-05	0.000197481	COTL1	23406	0.000328005	1019	1513	877	1941	1920	1884
1565	ENSG00000259781	165.024	-0.961204	0.225355	-4.26529	1.99638e-05	0.00019835	RP11-673C5.1	NA	0.000329448	217	231	199	120	82	141
1566	ENSG00000120800	210.814	-0.985641	0.231149	-4.2641	2.00709e-05	0.000199286	UTP20	27340	0.000331003	333	292	221	164	164	91
1567	ENSG00000257103	760.542	-0.592412	0.138986	-4.26238	2.02262e-05	0.000200701	LSM14A	26065	0.000333352	907	898	943	661	623	531
1568	ENSG00000163535	47.6365	-1.73213	0.406547	-4.26058	2.03895e-05	0.000202178	SGO2	151246	0.000335806	79	78	67	9	38	15
1569	ENSG00000013583	221.769	0.77711	0.182401	4.26045	2.04011e-05	0.000202178	HEBP1	50865	0.000335806	155	162	171	307	241	295
1570	ENSG00000136811	123.331	-0.958505	0.225001	-4.26001	2.04416e-05	0.00020245	ODF2	4957	0.000336258	169	163	160	89	91	68
1571	ENSG00000108510	240.628	-1.06883	0.25097	-4.2588	2.05531e-05	0.000203425	MED13	9969	0.000337877	377	332	278	167	211	78
1572	ENSG00000130827	30.6076	1.68553	0.395919	4.25727	2.06934e-05	0.000204683	PLXNA3	55558	0.000339967	15	12	16	38	47	55
1573	ENSG00000214756	31.1811	1.743	0.409435	4.25709	2.07102e-05	0.000204719	METTL12	751071	0.000340026	13	18	12	47	35	63
1574	ENSG00000263266	725.547	0.707887	0.166324	4.25607	2.08054e-05	0.000205529	RPS7P1	NA	0.000341372	478	552	619	1013	721	970
1575	ENSG00000009307	1980.96	-0.56546	0.132958	-4.25292	2.11002e-05	0.000208309	CSDE1	7812	0.00034599	2483	2185	2433	1666	1732	1388
1576	ENSG00000275993	874.013	-0.607398	0.142875	-4.25125	2.12577e-05	0.00020973	CH507-42P11.8	102724428	0.00034835	1003	1191	975	644	742	690
1577	ENSG00000065325	74.1285	1.15943	0.272744	4.251	2.12814e-05	0.000209738	GLP2R	9340	0.000348363	53	50	34	101	103	103
1578	ENSG00000100504	559.222	0.613102	0.144227	4.25096	2.12854e-05	0.000209738	PYGL	5836	0.000348363	397	475	455	706	665	657
1579	ENSG00000125037	716.911	0.651369	0.153237	4.25073	2.13077e-05	0.000209824	EMC3	55831	0.000348506	575	486	609	963	757	912
1580	ENSG00000214194	185.371	0.78611	0.184964	4.25006	2.13711e-05	0.000210316	LINC00998	NA	0.000349323	132	131	146	225	246	232
1581	ENSG00000269293	60.0677	1.34702	0.316987	4.24946	2.14286e-05	0.000210749	ZSCAN16-AS1	100129195	0.000350042	31	37	32	96	56	108
1582	ENSG00000184584	15.746	2.3585	0.555103	4.24877	2.14951e-05	0.000211269	TMEM173	340061	0.000350906	5	6	4	28	26	25
1583	ENSG00000198225	628.367	0.592639	0.139529	4.24741	2.16256e-05	0.000212417	FKBP1C	NA	0.000352813	521	485	502	755	818	690
1584	ENSG00000156976	389.05	0.821715	0.193493	4.24674	2.16904e-05	0.000212919	EIF4A2	100302143	0.000353646	244	230	370	443	533	514
1585	ENSG00000167779	255.844	0.849945	0.200187	4.24576	2.17855e-05	0.000213718	IGFBP6	3489	0.000354973	152	217	176	344	264	383
1586	ENSG00000162591	26.4457	1.82255	0.429396	4.24445	2.19131e-05	0.000214834	MEGF6	1953	0.000356827	10	14	11	31	42	50
1587	ENSG00000197580	16.439	2.32768	0.549139	4.23878	2.24734e-05	0.000220188	BCO2	83875	0.00036572	4	5	7	28	24	30
1588	ENSG00000133026	368.699	-0.715612	0.168868	-4.23769	2.25831e-05	0.000220989	MYH10	4628	0.00036705	527	437	409	302	263	275
1589	ENSG00000223298	11.6405	3.13797	0.740491	4.23769	2.25835e-05	0.000220989	RNY3P8	NA	0.00036705	1	3	3	14	16	33
1590	ENSG00000162614	13.4174	2.73869	0.64662	4.2354	2.28149e-05	0.000223112	NEXN	91624	0.000370577	2	4	5	16	31	23
1591	ENSG00000231925	739.065	0.606022	0.143097	4.23503	2.28517e-05	0.000223332	TAPBP	6892	0.000370942	580	653	524	837	886	954
1592	ENSG00000112977	1471.39	0.526902	0.124481	4.2328	2.30803e-05	0.000225424	DAP	1611	0.000374417	1280	1134	1203	1845	1699	1667
1593	ENSG00000152253	62.1162	-1.31073	0.309713	-4.23208	2.31541e-05	0.000226003	SPC25	57405	0.000375378	86	77	101	44	31	33
1594	ENSG00000068028	56.9543	1.34668	0.318357	4.2301	2.33591e-05	0.000227861	RASSF1	11186	0.000378464	35	40	22	94	85	65
1595	ENSG00000179750	46.2131	-1.4774	0.349283	-4.2298	2.33901e-05	0.000228021	APOBEC3B	9582	0.00037873	65	66	73	30	22	23
1596	ENSG00000063241	537.863	0.665493	0.157429	4.22727	2.36546e-05	0.000230455	ISOC2	79763	0.000382772	391	465	388	712	566	705
1597	ENSG00000177600	6479.3	0.576571	0.136422	4.22636	2.37499e-05	0.000231238	RPLP2	6181	0.000384074	4834	5514	5251	8232	6462	8583
1598	ENSG00000100227	409.72	-0.692687	0.163946	-4.2251	2.38838e-05	0.000232396	POLDIP3	84271	0.000385996	521	517	478	368	272	302
1599	ENSG00000147535	311.958	0.738049	0.174797	4.22233	2.41787e-05	0.000235119	PLPP5	84513	0.000390519	268	222	214	392	437	337
1600	ENSG00000118515	447.495	-0.667446	0.15811	-4.22141	2.42777e-05	0.000235933	SGK1	6446	0.000391872	579	488	585	347	374	312
1601	ENSG00000123353	236.15	0.792946	0.187862	4.22089	2.43335e-05	0.000236328	ORMDL2	29095	0.000392528	200	166	150	331	264	305
1602	ENSG00000172465	56.4327	1.25387	0.297092	4.22048	2.43784e-05	0.000236617	TCEAL1	9338	0.000393007	34	28	38	80	82	76
1603	ENSG00000065615	79.8105	-1.12954	0.267667	-4.21992	2.44384e-05	0.000237051	CYB5R4	51167	0.000393728	116	109	105	45	56	48
1604	ENSG00000070540	113.418	1.07734	0.25543	4.21775	2.46754e-05	0.0002392	WIPI1	55062	0.000397298	77	51	90	173	129	161
1605	ENSG00000171916	18.4009	2.35667	0.558881	4.21677	2.47824e-05	0.000239972	LGALS9C	654346	0.00039858	5	4	9	24	21	48
1606	ENSG00000075188	135.739	-1.04405	0.247596	-4.21674	2.47859e-05	0.000239972	NUP37	79023	0.00039858	189	186	180	87	118	53
1607	ENSG00000143493	229.73	-0.784831	0.186131	-4.21655	2.48067e-05	0.000240024	INTS7	25896	0.000398666	275	291	311	174	188	139
1608	ENSG00000144283	337.772	-0.687683	0.163097	-4.21641	2.48225e-05	0.000240028	PKP4	8502	0.000398673	426	433	392	230	278	267
1609	ENSG00000125356	1738.17	0.758217	0.179858	4.21565	2.49057e-05	0.000240683	NDUFA1	4694	0.00039976	1280	992	1598	2325	1743	2491
1610	ENSG00000159199	1833.87	0.648507	0.153916	4.21337	2.51583e-05	0.000242973	ATP5G1	516	0.000403565	1517	1375	1390	2745	1832	2143
1611	ENSG00000116251	1110.21	0.588262	0.139779	4.20853	2.5704e-05	0.000248089	RPL22	6146	0.000412062	859	791	1014	1329	1409	1259
1612	ENSG00000141696	266.408	0.753071	0.17901	4.20687	2.58936e-05	0.000249764	P3H4	10609	0.000414844	216	171	206	312	311	383
1613	ENSG00000104870	156.821	1.02017	0.242519	4.20656	2.59286e-05	0.000249946	FCGRT	2217	0.000415147	94	87	127	232	147	254
1614	ENSG00000171236	31.248	2.01799	0.479843	4.20551	2.60489e-05	0.00025095	LRG1	116844	0.000416814	7	6	24	49	41	60
1615	ENSG00000177410	366.752	0.863857	0.205426	4.20519	2.60859e-05	0.000251151	ZFAS1	441951	0.000417147	207	249	320	478	362	584
1616	ENSG00000180822	67.1149	1.16949	0.278133	4.20478	2.61331e-05	0.00025145	PSMG4	389362	0.000417644	37	45	41	101	78	101
1617	ENSG00000110108	354.452	-0.747574	0.177889	-4.20248	2.64006e-05	0.000253867	TMEM109	79073	0.000421658	470	506	356	263	266	264
1618	ENSG00000136875	325.082	-0.735653	0.175166	-4.19975	2.67206e-05	0.000256786	PRPF4	9128	0.000426506	408	458	352	274	229	229
1619	ENSG00000186575	417.77	0.692082	0.164799	4.19955	2.67451e-05	0.000256862	NF2	4771	0.000426634	305	333	318	427	512	612
1620	ENSG00000136108	185.174	-0.909435	0.216627	-4.19816	2.69091e-05	0.000258277	CKAP2	26586	0.000428983	254	250	229	129	161	88
1621	ENSG00000134291	515.153	-0.64864	0.154549	-4.19697	2.70508e-05	0.000259477	TMEM106C	79022	0.000430977	678	641	566	448	367	390
1622	ENSG00000153922	172.092	-0.862198	0.205492	-4.19577	2.71947e-05	0.000260697	CHD1	1105	0.000433003	217	224	231	115	145	101
1623	ENSG00000008294	435.195	-0.77623	0.185059	-4.19451	2.73463e-05	0.000261988	SPAG9	9043	0.000435148	656	498	501	279	392	285
1624	ENSG00000111276	101.255	-1.03896	0.247989	-4.18954	2.79526e-05	0.000267633	CDKN1B	1027	0.000444523	141	124	146	54	75	68
1625	ENSG00000214207	139.564	2.39436	0.572143	4.18489	2.85307e-05	0.000272999	KRT18P10	NA	0.000453436	37	49	47	249	90	365
1626	ENSG00000139496	125.3	-1.09922	0.262774	-4.18315	2.87498e-05	0.000274927	NUP58	9818	0.000456637	179	192	148	80	107	45
1627	ENSG00000113580	475.094	-0.630664	0.150794	-4.1823	2.88579e-05	0.00027579	NR3C1	2908	0.000458072	585	539	612	352	405	358
1628	ENSG00000071794	178.47	-0.930451	0.222486	-4.18207	2.88864e-05	0.000275894	HLTF	6596	0.000458244	241	228	241	105	163	93
1629	ENSG00000152102	510.26	-0.678201	0.162177	-4.18187	2.89121e-05	0.000275969	FAM168B	130074	0.000458369	656	688	545	372	445	355
1630	ENSG00000164024	302.07	-0.82597	0.197527	-4.18157	2.89508e-05	0.00027617	METAP1	23173	0.000458702	402	385	382	222	274	149
1631	ENSG00000214417	83.1925	3.43182	0.820863	4.18075	2.90551e-05	0.000276776	KRT18P13	NA	0.000459709	14	14	14	134	33	290
1632	ENSG00000247271	86.0616	1.02102	0.244223	4.18067	2.90653e-05	0.000276776	ZBED5-AS1	729013	0.000459709	54	56	61	112	123	111
1633	ENSG00000101294	2636.69	0.514308	0.123021	4.18065	2.90678e-05	0.000276776	HM13	81502	0.000459709	2218	2029	2263	3260	2826	3224
1634	ENSG00000047346	61.8107	1.31783	0.31528	4.17987	2.91675e-05	0.000277555	FAM214A	56204	0.000461003	37	26	44	80	115	68
1635	ENSG00000136826	105.406	-1.06124	0.253952	-4.17889	2.92934e-05	0.000278582	KLF4	9314	0.00046271	164	123	142	54	81	68
1636	ENSG00000233913	104.55	1.08871	0.260716	4.17583	2.96904e-05	0.000282175	RPL10P9	NA	0.000468677	66	62	70	152	97	181
1637	ENSG00000011304	2414.54	-0.576019	0.137946	-4.1757	2.97075e-05	0.000282175	PTBP1	100616459	0.000468677	3048	3212	2410	1992	1877	1949
1638	ENSG00000119969	87.8789	-1.27518	0.305414	-4.17527	2.97635e-05	0.000282535	HELLS	3070	0.000469274	132	148	99	49	72	28
1639	ENSG00000153391	185.99	0.875812	0.209857	4.17338	3.00118e-05	0.000284718	INO80C	125476	0.000472901	99	153	141	249	220	254
1640	ENSG00000177200	140.042	-0.978341	0.234443	-4.17304	3.00558e-05	0.000284962	CHD9	80205	0.000473305	207	161	195	84	118	76
1641	ENSG00000100462	314.154	-0.737941	0.176842	-4.17288	3.0078e-05	0.000284998	PRMT5	10419	0.000473366	414	434	328	244	220	244
1642	ENSG00000116096	760.502	0.605632	0.14517	4.17187	3.02107e-05	0.000286031	SPR	6697	0.000475081	618	594	592	890	805	1065
1643	ENSG00000213943	41.9008	1.77812	0.426231	4.17174	3.02282e-05	0.000286031	KRT18P17	NA	0.000475081	19	16	19	66	27	103
1644	ENSG00000188211	65.7488	-1.28945	0.309105	-4.17157	3.02511e-05	0.000286031	NCR3LG1	374383	0.000475081	104	100	80	35	48	28
1645	ENSG00000086827	98.6693	-1.03221	0.247445	-4.1715	3.02605e-05	0.000286031	ZW10	9183	0.000475081	140	126	134	72	70	50
1646	ENSG00000214108	15.6381	2.44365	0.585838	4.17121	3.0299e-05	0.000286221	TPT1P5	NA	0.000475396	6	6	2	33	26	20
1647	ENSG00000090013	1573.54	0.573147	0.137425	4.17063	3.03763e-05	0.000286776	BLVRB	645	0.000476319	1208	1207	1375	1871	1655	2126
1648	ENSG00000085982	213.293	-0.834345	0.200106	-4.16952	3.05242e-05	0.000287998	USP40	55230	0.000478348	278	298	251	141	186	126
1649	ENSG00000129810	52.3905	-1.38068	0.331168	-4.16911	3.05787e-05	0.000288337	SGO1	151648	0.000478911	73	76	79	38	28	20
1650	ENSG00000178802	359.592	0.707443	0.169828	4.16566	3.10459e-05	0.000292473	MPI	4351	0.000485781	264	279	278	541	414	383
1651	ENSG00000198805	550.496	0.644665	0.154762	4.16554	3.1062e-05	0.000292473	PNP	4860	0.000485781	448	451	388	778	613	625
1652	ENSG00000141504	279.151	0.798254	0.191637	4.16545	3.10737e-05	0.000292473	SAT2	112483	0.000485781	199	175	233	356	288	423
1653	ENSG00000163946	198.103	-0.920131	0.220962	-4.1642	3.12448e-05	0.000293906	FAM208A	23272	0.000488161	272	258	256	127	182	93
1654	ENSG00000008513	506.522	0.721119	0.173206	4.16335	3.13606e-05	0.000294816	ST3GAL1	6482	0.000489672	371	468	311	628	687	574
1655	ENSG00000232573	971.737	1.67623	0.402779	4.16165	3.15949e-05	0.00029684	RPL3P4	NA	0.000493034	424	454	510	1524	797	2121
1656	ENSG00000205060	387.479	-0.797715	0.191702	-4.16123	3.16535e-05	0.00029721	SLC35B4	84912	0.000493649	592	493	397	256	338	249
1657	ENSG00000240950	17.3114	2.51836	0.605402	4.15981	3.18511e-05	0.000298885	RP11-372E1.1	NA	0.000496431	6	5	4	30	12	48
1658	ENSG00000160179	183.073	0.850374	0.204453	4.15927	3.1927e-05	0.000299417	ABCG1	9619	0.000497315	132	114	143	270	192	247
1659	ENSG00000138081	143.052	-1.00213	0.240962	-4.15886	3.19842e-05	0.000299772	FBXO11	80204	0.000497905	191	178	210	80	128	71
1660	ENSG00000203879	671.889	0.620909	0.149309	4.15854	3.20284e-05	0.000300006	GDI1	2664	0.000498292	573	553	459	855	733	859
1661	ENSG00000100281	116.757	-1.02427	0.246363	-4.15756	3.21664e-05	0.000301117	HMGXB4	10042	0.000500139	145	163	166	92	86	48
1662	ENSG00000147649	566.786	-0.709995	0.170792	-4.15708	3.22343e-05	0.000301571	MTDH	92140	0.000500892	785	721	614	415	514	353
1663	ENSG00000100749	90.7205	-1.09787	0.264119	-4.15673	3.22839e-05	0.000301854	VRK1	7443	0.000501362	115	139	121	58	69	43
1664	ENSG00000215030	2574.93	1.57467	0.378889	4.15601	3.23849e-05	0.000302616	RPL13P12	NA	0.000502627	1188	1275	1419	4221	2119	5228
1665	ENSG00000167964	44.8582	1.48608	0.357603	4.15568	3.24321e-05	0.000302875	RAB26	25837	0.000503057	18	31	21	63	51	86
1666	ENSG00000142910	185.873	0.891939	0.214724	4.15389	3.2687e-05	0.000305072	TINAGL1	64129	0.000506708	106	159	125	201	238	287
1667	ENSG00000059573	920.669	0.533025	0.128423	4.15054	3.31687e-05	0.000309159	ALDH18A1	5832	0.000513496	800	715	741	1085	1063	1121
1668	ENSG00000182379	63.1456	-1.25566	0.302534	-4.15049	3.31763e-05	0.000309159	NXPH4	11247	0.000513496	97	94	76	33	40	38
1669	ENSG00000111011	223.484	-0.858883	0.206938	-4.15043	3.31846e-05	0.000309159	RSRC2	65117	0.000513496	266	240	354	155	143	181
1670	ENSG00000140416	2119.26	0.636358	0.153367	4.14925	3.33564e-05	0.000310574	TPM1	7168	0.000515846	1575	2022	1382	2349	2763	2624
1671	ENSG00000229798	12.347	2.95094	0.711481	4.1476	3.35986e-05	0.000312642	KRT18P26	NA	0.00051928	2	3	3	17	11	38
1672	ENSG00000253919	28.5674	-1.88613	0.454839	-4.14681	3.37134e-05	0.000313523	THAP12P7	NA	0.000520744	53	44	39	12	13	10
1673	ENSG00000048028	114.165	-0.953422	0.229988	-4.14552	3.39038e-05	0.000315104	USP28	57646	0.00052337	157	159	136	78	79	76
1674	ENSG00000138780	62.5547	-1.33247	0.321546	-4.14394	3.41396e-05	0.000317039	GSTCD	79807	0.000526584	94	92	87	37	47	18
1675	ENSG00000090060	865.076	-0.670308	0.16176	-4.14385	3.41527e-05	0.000317039	PAPOLA	10914	0.000526584	1111	1103	983	605	826	562
1676	ENSG00000174915	287.803	0.762885	0.184186	4.14192	3.44414e-05	0.000319528	PTDSS2	81490	0.000530718	245	217	175	361	321	408
1677	ENSG00000196712	360.907	-0.859627	0.20758	-4.14118	3.4552e-05	0.000320363	NF1	4763	0.000532105	502	492	412	244	341	174
1678	ENSG00000126458	409.754	0.689425	0.16649	4.14095	3.45876e-05	0.000320502	RRAS	6237	0.000532336	292	336	308	467	445	609
1679	ENSG00000148290	275.518	0.75861	0.183251	4.13974	3.47704e-05	0.000322004	SURF1	6834	0.00053483	204	185	221	366	281	395
1680	ENSG00000162402	236.175	-0.798301	0.192892	-4.13858	3.49457e-05	0.000323435	USP24	23358	0.000537207	319	317	270	157	206	149
1681	ENSG00000137804	33.1722	-1.75108	0.423326	-4.13649	3.52664e-05	0.000326209	NUSAP1	51203	0.000541814	51	59	42	12	14	20
1682	ENSG00000103042	143.552	0.892697	0.215827	4.13616	3.53159e-05	0.000326472	SLC38A7	55238	0.000542252	117	90	92	187	164	212
1683	ENSG00000170581	98.0723	0.966401	0.233833	4.13287	3.58266e-05	0.000330997	STAT2	6773	0.000549766	61	65	72	138	121	131
1684	ENSG00000137752	10.3575	3.00684	0.728147	4.12944	3.63642e-05	0.000335764	CASP1	834	0.000557685	3	2	2	21	14	20
1685	ENSG00000211445	126.129	0.883242	0.214015	4.12701	3.67513e-05	0.000339137	GPX3	2878	0.000563287	83	88	94	176	147	169
1686	ENSG00000141425	201.757	-0.843415	0.204374	-4.12681	3.6783e-05	0.000339214	RPRD1A	55197	0.000563415	268	284	227	178	138	116
1687	ENSG00000101888	54.7075	-1.4851	0.359878	-4.12668	3.68033e-05	0.000339214	NXT2	55916	0.000563415	90	75	82	24	44	13
1688	ENSG00000230453	30.4948	-1.92269	0.465968	-4.12624	3.68741e-05	0.000339665	ANKRD18B	441459	0.000564164	45	46	52	3	13	23
1689	ENSG00000137563	246.031	-0.78688	0.190741	-4.12539	3.701e-05	0.000340716	GGH	8836	0.00056591	331	298	311	159	220	156
1690	ENSG00000141510	475.738	-0.709818	0.172138	-4.12353	3.73108e-05	0.000343282	TP53	7157	0.000570171	501	556	712	385	330	370
1691	ENSG00000250321	72.0625	1.22051	0.296056	4.12257	3.74672e-05	0.000344517	RP11-478C6.4	NA	0.000572223	28	56	46	103	94	106
1692	ENSG00000138678	110.442	-1.04625	0.253812	-4.12215	3.75357e-05	0.000344943	GPAT3	84803	0.00057293	146	144	156	45	81	91
1693	ENSG00000196504	398.264	-0.646347	0.156863	-4.12045	3.78125e-05	0.000347281	PRPF40A	55660	0.000576814	517	477	468	293	342	292
1694	ENSG00000166716	357.831	-0.727653	0.176609	-4.12012	3.78669e-05	0.000347575	ZNF592	9640	0.000577303	493	461	389	297	290	217
1695	ENSG00000213763	44.8168	1.95423	0.474774	4.11613	3.85287e-05	0.000353441	ACTBP2	NA	0.000587046	19	15	19	89	18	108
1696	ENSG00000198796	111.538	0.952743	0.231496	4.1156	3.86175e-05	0.000354047	ALPK2	115701	0.000588052	74	77	80	157	168	113
1697	ENSG00000283041	3993.87	0.601874	0.146253	4.11528	3.86715e-05	0.000354333	RP11-371A22.1	NA	0.000588527	3142	3301	3068	5185	3800	5468
1698	ENSG00000023318	332.755	0.732437	0.178015	4.11446	3.88082e-05	0.000355376	ERP44	23071	0.000590259	263	205	284	373	463	408
1699	ENSG00000128908	119.427	-1.04355	0.253667	-4.11387	3.89089e-05	0.000356088	INO80	54617	0.000591442	166	186	135	85	93	50
1700	ENSG00000140022	47.228	1.37716	0.334864	4.11259	3.91247e-05	0.000357853	STON2	85439	0.000594374	23	28	27	47	70	88
1701	ENSG00000230207	155.261	1.08119	0.263025	4.1106	3.9463e-05	0.000360735	RPL4P5	NA	0.00059916	93	93	110	258	121	257
1702	ENSG00000172831	291.846	0.67262	0.163672	4.10955	3.96429e-05	0.000362167	CES2	8824	0.000601539	226	208	239	344	349	385
1703	ENSG00000145819	333.111	-0.655692	0.159563	-4.10929	3.9688e-05	0.000362366	ARHGAP26	23092	0.000601869	430	396	398	274	257	244
1704	ENSG00000119383	895.341	-0.601182	0.146321	-4.10865	3.97973e-05	0.00036315	PTPA	5524	0.000603172	1165	1112	955	757	625	758
1705	ENSG00000105202	2037.77	-0.581223	0.141469	-4.10848	3.98274e-05	0.000363212	FBL	2091	0.000603274	2305	2500	2513	1720	1347	1841
1706	ENSG00000173456	201.974	-0.937884	0.228327	-4.10764	3.99721e-05	0.000364318	RNF26	79102	0.000605112	311	299	186	157	126	133
1707	ENSG00000163235	132.776	0.917807	0.223466	4.10715	4.00575e-05	0.000364882	TGFA	7039	0.000606049	95	78	103	143	198	179
1708	ENSG00000150768	377.366	-0.734514	0.178854	-4.10679	4.01191e-05	0.000364917	DLAT	1737	0.000606107	527	461	434	262	344	237
1709	ENSG00000054116	353.2	0.635001	0.154622	4.10679	4.01192e-05	0.000364917	TRAPPC3	27095	0.000606107	266	279	283	438	398	456
1710	ENSG00000163882	240.871	0.742844	0.180885	4.10672	4.01318e-05	0.000364917	POLR2H	5437	0.000606107	176	195	166	326	259	322
1711	ENSG00000101150	707.366	0.590794	0.143919	4.10505	4.04224e-05	0.000367345	TPD52L2	7165	0.000610139	590	598	502	900	772	881
1712	ENSG00000235437	141.049	0.8406	0.204802	4.10445	4.05275e-05	0.000367904	LINC01278	92249	0.000611067	104	95	105	185	195	161
1713	ENSG00000110075	309.14	-0.772124	0.188124	-4.10435	4.05461e-05	0.000367904	PPP6R3	55291	0.000611067	365	478	330	216	247	219
1714	ENSG00000117984	1827.07	0.598942	0.145931	4.1043	4.05548e-05	0.000367904	CTSD	1509	0.000611067	1628	1299	1427	2285	1864	2461
1715	ENSG00000108826	609.473	0.670877	0.163507	4.10306	4.0773e-05	0.000369667	MRPL27	51264	0.000613997	449	456	500	804	591	856
1716	ENSG00000117682	209.652	0.734286	0.178979	4.10263	4.08472e-05	0.000370124	DHDDS	79947	0.000614755	157	169	146	272	250	264
1717	ENSG00000258314	8.52641	3.44014	0.838584	4.10232	4.09029e-05	0.000370413	CTD-2314B22.1	NA	0.000615235	2	1	1	12	17	18
1718	ENSG00000063177	8800.92	0.588787	0.143537	4.102	4.09589e-05	0.000370704	RPL18	6141	0.000615719	6595	7141	7346	11461	8426	11837
1719	ENSG00000226965	8.14926	3.89737	0.950315	4.10113	4.11129e-05	0.000371882	AC003088.1	105375451	0.000617675	2	0	1	19	12	15
1720	ENSG00000196358	87.0257	-1.07071	0.2611	-4.10076	4.11799e-05	0.000372271	NTNG2	84628	0.000618321	110	124	117	63	47	60
1721	ENSG00000170231	16.1398	2.43906	0.594812	4.10055	4.12163e-05	0.000372384	FABP6	2172	0.000618508	6	6	3	40	14	28
1722	ENSG00000067560	3064.69	-0.486175	0.118605	-4.09911	4.14739e-05	0.000374494	RHOA	387	0.000622013	3762	3583	3383	2724	2467	2468
1723	ENSG00000160688	536.977	0.634514	0.154815	4.09853	4.15782e-05	0.000375217	FLAD1	80308	0.000623214	394	424	439	663	556	745
1724	ENSG00000110092	1480.21	0.635558	0.155082	4.0982	4.16381e-05	0.00037554	CCND1	595	0.00062375	1145	1368	969	1798	2017	1584
1725	ENSG00000166165	578.153	0.641559	0.156559	4.09788	4.16948e-05	0.000375768	CKB	1152	0.000624128	396	454	502	642	667	808
1726	ENSG00000127947	410.662	-0.738067	0.180114	-4.09779	4.17117e-05	0.000375768	PTPN12	5782	0.000624128	493	463	592	290	372	254
1727	ENSG00000171262	166.57	-0.833218	0.203372	-4.09702	4.185e-05	0.000376796	FAM98B	283742	0.000625836	220	191	231	131	119	108
1728	ENSG00000138347	24.9879	2.1452	0.523685	4.09636	4.19692e-05	0.00037765	MYPN	84665	0.000627255	5	11	13	17	66	38
1729	ENSG00000112941	58.4102	-1.34196	0.327637	-4.09586	4.20612e-05	0.000378259	PAPD7	11044	0.000628267	84	101	67	24	37	38
1730	ENSG00000119522	294.026	-0.676469	0.165173	-4.09551	4.21236e-05	0.000378601	DENND1A	57706	0.000628835	381	346	358	241	220	219
1731	ENSG00000164924	4196.55	-0.635214	0.155138	-4.09451	4.23069e-05	0.000380029	YWHAZ	7534	0.000631206	5368	5218	4744	3178	4058	2614
1732	ENSG00000108671	831.674	-0.580241	0.141719	-4.09432	4.23407e-05	0.000380113	PSMD11	5717	0.000631346	974	1098	924	665	723	607
1733	ENSG00000137177	286.36	-0.750482	0.183355	-4.09305	4.2573e-05	0.000381978	KIF13A	63971	0.000634443	413	362	305	232	218	189
1734	ENSG00000116906	500.52	-0.614595	0.15019	-4.09211	4.27463e-05	0.000383312	GNPAT	8443	0.000636659	632	582	608	394	436	350
1735	ENSG00000163110	2851.1	-0.574986	0.140525	-4.0917	4.28215e-05	0.000383764	PDLIM5	10611	0.000637411	3535	3005	3702	2461	2458	1944
1736	ENSG00000126803	486.177	0.945424	0.231077	4.09138	4.28806e-05	0.000384073	HSPA2	3306	0.000637923	401	399	194	637	526	761
1737	ENSG00000172830	351.138	0.662448	0.161919	4.09123	4.29099e-05	0.000384114	SSH3	54961	0.000637991	273	287	252	391	412	491
1738	ENSG00000038427	1838.56	-0.594995	0.145494	-4.08948	4.32342e-05	0.000386795	VCAN	1462	0.000642444	2395	1973	2278	1439	1694	1252
1739	ENSG00000092140	54.4411	-1.4308	0.349923	-4.08889	4.33434e-05	0.000387548	G2E3	55632	0.000643695	96	62	83	21	39	25
1740	ENSG00000100284	368.181	0.707478	0.173031	4.08873	4.33743e-05	0.000387602	TOM1	10043	0.000643785	258	245	333	467	411	494
1741	ENSG00000169446	137.584	-1.12964	0.27633	-4.08802	4.3507e-05	0.000388564	MMGT1	93380	0.000645383	209	188	178	63	133	55
1742	ENSG00000100629	36.0193	-1.6805	0.411261	-4.08622	4.3846e-05	0.000391224	CEP128	145508	0.0006498	57	61	50	14	24	10
1743	ENSG00000104325	614.889	0.778752	0.190582	4.08617	4.38551e-05	0.000391224	DECR1	1666	0.0006498	441	335	582	881	685	766
1744	ENSG00000102109	117.579	0.90257	0.220942	4.0851	4.40579e-05	0.000392807	PCSK1N	27344	0.00065243	73	86	87	138	160	161
1745	ENSG00000178966	32.907	-1.70069	0.416557	-4.08273	4.45094e-05	0.000396606	RMI1	80010	0.00065874	52	48	51	10	18	18
1746	ENSG00000165282	509.882	-0.69069	0.169269	-4.08042	4.49549e-05	0.000400346	PIGO	84720	0.000664951	738	621	531	441	378	350
1747	ENSG00000117592	2120.05	0.486903	0.119473	4.07543	4.5929e-05	0.000408787	PRDX6	9588	0.000678971	1666	1777	1851	2475	2357	2594
1748	ENSG00000212664	50.0294	1.29842	0.318616	4.07518	4.59792e-05	0.000408999	RP11-592N21.1	NA	0.000679325	27	24	36	80	70	63
1749	ENSG00000108582	541.196	-0.790868	0.194084	-4.07488	4.60379e-05	0.000409288	CPD	1362	0.000679803	776	601	690	345	527	307
1750	ENSG00000111300	142.717	-0.909713	0.22342	-4.07176	4.66602e-05	0.000414582	NAA25	80018	0.000688598	221	171	169	91	109	96
1751	ENSG00000141401	220.049	-0.806243	0.198072	-4.07045	4.69228e-05	0.000416565	IMPA2	3613	0.00069189	315	293	236	167	176	133
1752	ENSG00000245532	137.836	1.01684	0.249815	4.07038	4.69368e-05	0.000416565	NEAT1	693197	0.00069189	87	99	86	115	195	244
1753	ENSG00000180573	143.897	1.00541	0.247091	4.06899	4.72176e-05	0.000418817	HIST1H2AC	8334	0.000695631	78	75	134	171	203	201
1754	ENSG00000099956	455.499	-0.621373	0.152761	-4.06761	4.7498e-05	0.000421065	SMARCB1	6598	0.000699364	503	590	561	375	334	370
1755	ENSG00000162078	42.1803	1.54483	0.380066	4.06465	4.81044e-05	0.000426196	ZG16B	124220	0.000707888	25	13	27	75	44	71
1756	ENSG00000126453	145.741	-0.95874	0.235936	-4.06357	4.83288e-05	0.000427941	BCL2L12	83596	0.000710786	187	230	156	108	80	113
1757	ENSG00000132436	77.8505	-1.41068	0.347266	-4.06225	4.86016e-05	0.000430112	FIGNL1	63979	0.000714391	132	142	70	40	60	23
1758	ENSG00000136153	347.522	0.67182	0.165429	4.06106	4.88498e-05	0.000432062	LMO7	4008	0.000717631	254	272	282	380	492	405
1759	ENSG00000178449	212.027	0.823525	0.202852	4.05974	4.91274e-05	0.00043427	COX14	84987	0.000721298	145	141	170	293	209	315
1760	ENSG00000125457	152.052	-0.837975	0.206424	-4.05949	4.91803e-05	0.000434492	MIF4GD	57409	0.000721666	196	188	199	122	99	108
1761	ENSG00000138604	165.121	-0.88414	0.217825	-4.05894	4.92956e-05	0.0004352	GLCE	26035	0.000722843	228	216	204	131	133	78
1762	ENSG00000168894	386.593	0.724679	0.178543	4.05884	4.93165e-05	0.0004352	RNF181	51255	0.000722843	252	293	326	555	390	504
1763	ENSG00000166275	47.7897	1.31475	0.324006	4.0578	4.95364e-05	0.000436893	BORCS7	119032	0.000725654	21	29	32	75	66	63
1764	ENSG00000130477	33.3726	-1.77632	0.438019	-4.05535	5.00584e-05	0.000441069	UNC13A	23025	0.00073259	49	42	62	9	13	25
1765	ENSG00000134258	8.29974	3.65985	0.902482	4.05532	5.00667e-05	0.000441069	VTCN1	79679	0.00073259	1	2	1	7	22	18
1766	ENSG00000112576	2469.21	0.614731	0.151657	4.05341	5.04754e-05	0.000444418	CCND3	896	0.000738152	2184	2072	1597	3441	2754	2768
1767	ENSG00000125735	8.64187	3.7114	0.915654	4.05328	5.05055e-05	0.000444431	TNFSF14	8740	0.000738175	3	1	0	10	15	23
1768	ENSG00000117228	22.8926	2.00428	0.494656	4.05187	5.08091e-05	0.00044685	GBP1	2633	0.000742191	12	11	5	28	54	28
1769	ENSG00000066027	190.073	-0.90988	0.224646	-4.05028	5.11558e-05	0.000449645	PPP2R5A	5525	0.000746835	256	233	263	112	178	98
1770	ENSG00000259291	25.4428	1.75799	0.434159	4.04917	5.1399e-05	0.000451527	RP11-617F23.1	NA	0.000749961	13	8	14	42	36	40
1771	ENSG00000116586	356.594	0.845801	0.208923	4.0484	5.15699e-05	0.000452773	LAMTOR2	28956	0.000752029	252	245	263	525	298	557
1772	ENSG00000213347	32.8218	-1.82568	0.451178	-4.04647	5.19958e-05	0.000456254	MXD3	83463	0.000757812	50	58	43	7	12	28
1773	ENSG00000244694	7.62268	4.1732	1.03136	4.04631	5.20317e-05	0.000456311	PTCHD4	442213	0.000757907	2	0	0	12	16	15
1774	ENSG00000113811	162.74	0.873153	0.215808	4.04597	5.21077e-05	0.000456672	SELK	58515	0.000758507	116	117	109	225	159	252
1775	ENSG00000173848	347.353	-0.663785	0.164065	-4.04586	5.21316e-05	0.000456672	NET1	10276	0.000758507	392	428	455	295	245	269
1776	ENSG00000174606	92.6807	-1.07577	0.265948	-4.04503	5.23161e-05	0.000458031	ANGEL2	90806	0.000760763	122	121	136	40	72	65
1777	ENSG00000102030	388.114	0.635861	0.157219	4.04442	5.24518e-05	0.000458961	NAA10	8260	0.000762308	300	304	303	488	411	521
1778	ENSG00000104331	569.047	-0.637667	0.15771	-4.04329	5.27069e-05	0.000460933	IMPAD1	54928	0.000765584	742	657	687	396	525	408
1779	ENSG00000170190	243.879	0.781723	0.193349	4.04307	5.27567e-05	0.00046111	SLC16A5	9121	0.000765877	191	157	190	382	279	264
1780	ENSG00000069011	347.211	-0.634737	0.157033	-4.04206	5.29835e-05	0.000462831	PITX1	5307	0.000768737	403	417	447	276	269	272
1781	ENSG00000198925	173.577	-0.837614	0.207337	-4.03986	5.34829e-05	0.000466681	ATG9A	79065	0.000775131	238	224	207	153	118	101
1782	ENSG00000071553	1122.64	0.55112	0.136421	4.03986	5.34842e-05	0.000466681	ATP6AP1	537	0.000775131	960	849	918	1392	1174	1443
1783	ENSG00000186226	4.17331	6.17369	1.52839	4.03933	5.36039e-05	0.000467464	LCE1E	353135	0.00077643	0	0	0	3	9	13
1784	ENSG00000131015	34.2732	1.50495	0.372682	4.03817	5.387e-05	0.000469521	ULBP2	80328	0.000779847	18	19	16	40	56	55
1785	ENSG00000276180	133.394	1.12286	0.278145	4.03695	5.41498e-05	0.000471695	HIST1H4I	8294	0.000783458	88	71	97	178	263	103
1786	ENSG00000156639	331.673	0.636345	0.157695	4.03529	5.4534e-05	0.000474776	ZFAND3	60685	0.000788575	253	243	283	401	400	411
1787	ENSG00000167740	172.94	0.98346	0.243747	4.03475	5.46604e-05	0.00047561	CYB5D2	124936	0.000789961	121	75	152	258	202	229
1788	ENSG00000184787	227.03	0.840503	0.208359	4.03392	5.48539e-05	0.000477026	UBE2G2	7327	0.000792313	177	190	123	331	302	239
1789	ENSG00000235587	30.7772	2.21166	0.548316	4.03355	5.49403e-05	0.000477511	GAPDHP65	NA	0.000793118	10	10	12	54	11	88
1790	ENSG00000064601	579.833	0.620496	0.153857	4.03294	5.50845e-05	0.000478494	CTSA	5476	0.000794751	458	440	468	764	583	766
1791	ENSG00000174373	94.7067	-1.10129	0.273082	-4.03281	5.5115e-05	0.000478494	RALGAPA1	253959	0.000794751	151	119	123	68	73	35
1792	ENSG00000116661	42.1553	1.44815	0.359145	4.03221	5.52555e-05	0.000479446	FBXO2	26232	0.000796332	21	19	26	66	42	78
1793	ENSG00000183778	27.6568	1.74772	0.433525	4.03141	5.54427e-05	0.000480803	B3GALT5	10317	0.000798586	8	15	15	31	48	48
1794	ENSG00000101191	291.024	-0.70319	0.174437	-4.0312	5.54927e-05	0.000480968	DIDO1	11083	0.00079886	376	385	325	227	242	191
1795	ENSG00000159840	1379.65	0.584155	0.14492	4.03088	5.5569e-05	0.000481361	ZYX	7791	0.000799513	1062	1280	973	1496	1803	1665
1796	ENSG00000168268	458.458	-0.785383	0.194911	-4.02945	5.59069e-05	0.000484018	NT5DC2	64943	0.000803927	657	652	433	408	312	290
1797	ENSG00000014216	1799.25	0.506513	0.125729	4.0286	5.6109e-05	0.000485497	CAPN1	823	0.000806383	1617	1447	1392	2070	2015	2254
1798	ENSG00000143774	624.916	0.625976	0.15547	4.02636	5.66475e-05	0.000489884	GUK1	2987	0.00081367	474	503	492	816	618	846
1799	ENSG00000160766	208.828	0.776058	0.192782	4.02558	5.68354e-05	0.000491067	GBAP1	2630	0.000815634	156	149	153	237	230	327
1800	ENSG00000132780	476.731	-0.636848	0.158202	-4.02553	5.68474e-05	0.000491067	NASP	4678	0.000815634	541	643	552	387	330	408
1801	ENSG00000159131	573.879	-0.597422	0.148417	-4.0253	5.69036e-05	0.000491279	GART	2618	0.000815987	655	761	660	420	494	453
1802	ENSG00000123159	765.322	0.537975	0.13367	4.02464	5.70637e-05	0.000492388	GIPC1	10755	0.000817828	612	668	590	914	865	942
1803	ENSG00000196230	7404.33	-0.609512	0.151486	-4.02354	5.7329e-05	0.000494403	TUBB	203068	0.000821175	9651	10302	6885	6153	5876	5558
1804	ENSG00000229119	2525.62	0.463449	0.115231	4.02192	5.77245e-05	0.000497374	CTB-63M22.1	NA	0.000826109	2158	2018	2193	2983	2838	2964
1805	ENSG00000143537	845.626	0.576274	0.143287	4.0218	5.77544e-05	0.000497374	ADAM15	8751	0.000826109	780	659	598	998	1029	1010
1806	ENSG00000173992	160.634	0.804047	0.199925	4.02174	5.77694e-05	0.000497374	CCS	9973	0.000826109	116	119	114	201	178	237
1807	ENSG00000138074	384.509	-0.677566	0.168502	-4.02111	5.79234e-05	0.000498424	SLC5A6	8884	0.000827853	502	517	399	319	278	292
1808	ENSG00000242265	660.843	-0.64816	0.16122	-4.02034	5.81131e-05	0.000499779	PEG10	23089	0.000830105	830	924	670	492	570	479
1809	ENSG00000198862	73.9122	-1.1791	0.293357	-4.01933	5.83632e-05	0.000501653	LTN1	26046	0.000833217	127	94	88	38	51	45
1810	ENSG00000234678	54.3992	1.22216	0.30413	4.01854	5.85592e-05	0.000503059	RP11-465N4.4	NA	0.000835552	27	33	38	84	72	73
1811	ENSG00000134030	143.051	0.846328	0.210621	4.01826	5.86303e-05	0.000503392	CTIF	9811	0.000836105	106	109	91	155	188	209
1812	ENSG00000143416	370.703	0.854098	0.212653	4.01639	5.90962e-05	0.000507112	SELENBP1	8991	0.000842283	312	190	289	609	389	436
1813	ENSG00000175854	128.99	0.859037	0.21389	4.01625	5.91319e-05	0.000507138	SWI5	375757	0.000842327	97	92	84	169	148	184
1814	ENSG00000185104	348.424	-0.662118	0.164903	-4.01521	5.93933e-05	0.000509099	FAF1	11124	0.000845585	402	421	458	307	249	254
1815	ENSG00000124767	576.92	-0.656027	0.163476	-4.01298	5.99577e-05	0.000513622	GLO1	2739	0.000853097	671	703	753	431	538	365
1816	ENSG00000104687	1157.24	-0.509831	0.127049	-4.01286	5.9987e-05	0.000513622	GSR	2936	0.000853097	1337	1440	1298	975	906	987
1817	ENSG00000187634	187.968	-1.07925	0.26904	-4.01148	6.03403e-05	0.000516363	SAMD11	148398	0.000857649	258	222	282	188	72	106
1818	ENSG00000132716	121.687	0.854172	0.212955	4.01105	6.04491e-05	0.00051701	DCAF8	50717	0.000858723	84	85	91	147	162	161
1819	ENSG00000006831	632.939	-0.57088	0.142334	-4.01084	6.05041e-05	0.000517195	ADIPOR2	79602	0.000859032	767	758	751	539	540	443
1820	ENSG00000109846	22.529	1.96468	0.489885	4.01048	6.05954e-05	0.000517691	CRYAB	1410	0.000859855	9	5	14	45	30	33
1821	ENSG00000173918	205.715	0.856446	0.213667	4.00832	6.11524e-05	0.000522163	C1QTNF1	114897	0.000867282	131	163	141	246	206	348
1822	ENSG00000183579	217.999	-0.762503	0.190357	-4.00564	6.18494e-05	0.000527684	ZNRF3	84133	0.000876453	288	280	256	194	152	139
1823	ENSG00000188582	31.299	1.54211	0.384991	4.00557	6.18669e-05	0.000527684	PAQR9	344838	0.000876453	14	16	18	44	53	43
1824	ENSG00000185347	85.1202	-1.08613	0.271176	-4.00524	6.1954e-05	0.000528055	C14orf80	283643	0.00087707	113	134	99	61	47	58
1825	ENSG00000120915	94.5114	0.966304	0.241266	4.00515	6.19783e-05	0.000528055	EPHX2	2053	0.00087707	60	57	74	127	117	131
1826	ENSG00000126215	72.8517	-1.24545	0.311013	-4.00449	6.21513e-05	0.000529239	XRCC3	7517	0.000879036	94	137	76	47	40	43
1827	ENSG00000132109	108.793	0.953879	0.238294	4.00294	6.25597e-05	0.000532425	TRIM21	6737	0.000884328	74	78	70	181	124	126
1828	ENSG00000226360	80.0874	1.34054	0.334913	4.00265	6.26382e-05	0.000532801	RPL10AP6	NA	0.000884953	38	53	43	138	56	154
1829	ENSG00000142156	147.602	0.873551	0.218304	4.00154	6.29317e-05	0.000535005	COL6A1	1291	0.000888613	103	88	119	164	179	232
1830	ENSG00000021776	573.928	-0.660797	0.165159	-4.00098	6.30816e-05	0.000535987	AQR	9716	0.000890244	770	630	716	387	532	408
1831	ENSG00000161091	966.071	0.553837	0.138549	3.99741	6.40404e-05	0.000543837	MFSD12	126321	0.000903281	799	739	806	1088	1050	1315
1832	ENSG00000158769	482.801	0.649923	0.16261	3.99682	6.41983e-05	0.00054488	F11R	50848	0.000905014	398	323	408	511	652	604
1833	ENSG00000153574	64.8352	-1.22416	0.306299	-3.99661	6.42569e-05	0.00054508	RPIA	22934	0.000905346	96	105	72	44	39	33
1834	ENSG00000159176	4747.12	0.534975	0.133875	3.99608	6.43992e-05	0.000545989	CSRP1	1465	0.000906857	4166	4235	3230	5716	5701	5435
1835	ENSG00000106628	1027.39	-0.60096	0.150392	-3.99595	6.44344e-05	0.000545989	POLD2	5425	0.000906857	1353	1336	1026	893	786	771
1836	ENSG00000111801	24.1775	1.76765	0.442662	3.99322	6.5181e-05	0.000552015	BTN3A3	10384	0.000916865	10	9	14	31	40	40
1837	ENSG00000162076	193.376	0.760723	0.190522	3.99284	6.52864e-05	0.000552607	FLYWCH2	114984	0.000917848	126	147	156	258	219	254
1838	ENSG00000243964	14.4042	3.07767	0.771732	3.988	6.66315e-05	0.000563685	RPL23AP65	NA	0.000936248	1	6	2	24	5	48
1839	ENSG00000261118	8.03611	3.6183	0.907346	3.98778	6.66931e-05	0.000563713	RP11-104N10.1	NA	0.000936294	2	0	2	12	20	13
1840	ENSG00000163545	364.468	0.661984	0.166005	3.98773	6.67073e-05	0.000563713	NUAK2	81788	0.000936294	269	324	252	422	426	494
1841	ENSG00000186198	320.241	0.891184	0.223511	3.9872	6.68576e-05	0.000564676	SLC51B	123264	0.000937895	199	184	287	467	288	496
1842	ENSG00000114942	3984.27	0.514056	0.128977	3.98563	6.73008e-05	0.000568111	EEF1B2	1933	0.0009436	3210	3239	3392	5178	4034	4853
1843	ENSG00000221968	74.3264	1.0645	0.267143	3.98474	6.75544e-05	0.000569942	FADS3	3995	0.000946641	41	56	46	99	92	111
1844	ENSG00000003400	52.589	1.20883	0.303417	3.98405	6.77497e-05	0.00057128	CASP10	843	0.000948863	33	28	33	70	68	83
1845	ENSG00000197530	56.5352	1.17608	0.295257	3.98325	6.79797e-05	0.000572909	MIB2	142678	0.000951568	39	31	33	77	73	86
1846	ENSG00000141556	377.649	-0.724622	0.181937	-3.98282	6.81015e-05	0.000573624	TBCD	6904	0.000952757	495	547	373	283	309	259
1847	ENSG00000236735	43.1323	1.89735	0.476429	3.98243	6.82128e-05	0.00057425	RPL31P63	NA	0.000953797	15	24	14	75	20	111
1848	ENSG00000169429	135.642	1.08882	0.273517	3.98081	6.86817e-05	0.000577885	CXCL8	3576	0.000959834	54	88	120	145	219	189
1849	ENSG00000263001	311.262	-0.696348	0.174957	-3.98011	6.88833e-05	0.000579265	GTF2I	2969	0.000962126	435	375	348	249	255	204
1850	ENSG00000243279	98.0655	0.967162	0.243007	3.97998	6.89202e-05	0.000579265	PRAF2	11230	0.000962126	62	57	81	136	132	121
1851	ENSG00000154429	45.0012	-1.45753	0.366255	-3.97954	6.90493e-05	0.000580015	CCSAP	126731	0.000963372	70	78	49	26	23	23
1852	ENSG00000272068	47.5571	1.34031	0.336811	3.97942	6.90841e-05	0.000580015	RP11-284F21.9	NA	0.000963372	26	28	25	56	55	96
1853	ENSG00000160949	111.911	-0.989619	0.248792	-3.97769	6.95872e-05	0.000583649	TONSL	4796	0.000969408	137	184	125	75	73	78
1854	ENSG00000130695	66.1341	-1.16257	0.292273	-3.97768	6.95919e-05	0.000583649	CEP85	64793	0.000969408	91	95	90	33	47	40
1855	ENSG00000120875	1298.24	-0.51954	0.130635	-3.97703	6.9782e-05	0.000584928	DUSP4	1846	0.000971531	1469	1496	1631	1094	1141	960
1856	ENSG00000266402	248.421	2.58952	0.65155	3.9744	7.05564e-05	0.0005911	SNHG25	NA	0.000981783	45	87	80	525	142	612
1857	ENSG00000161847	137.179	-0.942291	0.23716	-3.97323	7.09041e-05	0.000593481	RAVER1	125950	0.000985739	204	202	136	94	100	86
1858	ENSG00000176973	30.5362	1.54891	0.389841	3.97319	7.0917e-05	0.000593481	FAM89B	23625	0.000985739	15	17	14	40	44	53
1859	ENSG00000164134	307.347	-0.996072	0.250739	-3.97255	7.11074e-05	0.000594755	NAA15	80155	0.000987854	441	392	407	187	310	108
1860	ENSG00000186918	62.7363	-1.1813	0.297409	-3.97199	7.12762e-05	0.000595846	ZNF395	55893	0.000989666	83	88	90	45	37	33
1861	ENSG00000126107	298.29	0.72299	0.182129	3.96965	7.19782e-05	0.000601391	HECTD3	79654	0.000998877	226	245	200	319	343	456
1862	ENSG00000013364	2566.88	0.571964	0.144089	3.96952	7.20173e-05	0.000601395	MVP	9961	0.000998882	2271	1794	2123	3026	2672	3516
1863	ENSG00000095319	414.383	-0.783237	0.197343	-3.96891	7.22024e-05	0.000602616	NUP188	23511	0.00100091	635	562	376	335	301	277
1864	ENSG00000082641	707.773	-0.574415	0.144749	-3.96836	7.2368e-05	0.000603375	NFE2L1	4779	0.00100217	891	867	788	522	638	541
1865	ENSG00000140350	1418.14	-0.507243	0.127822	-3.96835	7.23708e-05	0.000603375	ANP32A	8125	0.00100217	1628	1665	1694	1196	1055	1269
1866	ENSG00000100941	310.255	-0.682768	0.1721	-3.96727	7.27011e-05	0.000605803	PNN	5411	0.0010062	377	367	400	206	228	285
1867	ENSG00000125845	696.155	0.693116	0.174717	3.96708	7.27599e-05	0.000605969	BMP2	650	0.00100648	627	473	502	876	1025	675
1868	ENSG00000136942	3945.84	0.623192	0.157122	3.96629	7.29988e-05	0.000607633	RPL35	11224	0.00100924	2911	3306	3095	5269	3608	5485
1869	ENSG00000107249	291.628	-0.754023	0.19012	-3.96604	7.30757e-05	0.000607948	GLIS3	169792	0.00100977	363	318	424	227	247	171
1870	ENSG00000131828	1433.86	0.605145	0.15259	3.96582	7.31442e-05	0.000608192	PDHA1	5160	0.00101017	1197	1059	1150	1875	1368	1954
1871	ENSG00000225255	8.01622	3.54789	0.895119	3.9636	7.38275e-05	0.000613546	LINC01297	106146148	0.00101906	1	1	3	16	13	15
1872	ENSG00000267795	11.4234	2.73611	0.690338	3.96343	7.38791e-05	0.000613646	SMIM22	440335	0.00101923	2	3	5	23	14	23
1873	ENSG00000077044	326.641	-0.658496	0.16621	-3.96183	7.43784e-05	0.000617464	DGKD	8527	0.00102557	429	396	372	281	232	249
1874	ENSG00000069956	421.096	-0.749925	0.189368	-3.96014	7.49058e-05	0.00062151	MAPK6	5597	0.00103229	563	532	500	283	410	239
1875	ENSG00000069248	208.454	-0.811039	0.204849	-3.9592	7.51998e-05	0.000623617	NUP133	55746	0.00103579	267	267	270	147	189	111
1876	ENSG00000100296	323.71	-0.679272	0.171646	-3.9574	7.57709e-05	0.000628018	THOC5	8563	0.0010431	371	412	407	225	228	300
1877	ENSG00000035499	75.3499	-1.3193	0.333581	-3.95497	7.65455e-05	0.0006341	DEPDC1B	55789	0.0010532	106	132	90	42	64	18
1878	ENSG00000138829	1122.86	0.785541	0.19876	3.95222	7.74305e-05	0.000641089	FBN2	2201	0.00106481	861	1038	577	1162	1735	1365
1879	ENSG00000213625	299.571	0.701749	0.177655	3.95007	7.81298e-05	0.000646535	LEPROT	54741	0.00107386	233	233	223	323	449	337
1880	ENSG00000185834	36.0879	1.8143	0.459497	3.94845	7.86578e-05	0.000650559	RPL12P4	NA	0.00108054	13	19	14	66	21	83
1881	ENSG00000172531	1507.54	-0.532571	0.134974	-3.94572	7.95606e-05	0.000657676	PPP1CA	5499	0.00109236	1811	1846	1685	1357	1070	1277
1882	ENSG00000100664	905.411	-0.767862	0.194617	-3.9455	7.9633e-05	0.000657924	EIF5	1983	0.00109277	1148	1324	962	621	890	489
1883	ENSG00000125977	1763.44	-0.602847	0.152867	-3.9436	8.02659e-05	0.000662581	EIF2S2	8894	0.00110051	1835	1916	2630	1432	1400	1368
1884	ENSG00000004897	356.239	-0.782038	0.198308	-3.94356	8.02818e-05	0.000662581	CDC27	996	0.00110051	484	444	431	199	348	232
1885	ENSG00000271605	46.121	1.25963	0.319445	3.94319	8.04054e-05	0.000663249	MILR1	284021	0.00110162	28	27	26	63	60	73
1886	ENSG00000242125	134.164	-0.862777	0.218825	-3.94277	8.05464e-05	0.000664026	SNHG3	8420	0.00110291	153	178	189	99	95	91
1887	ENSG00000272886	54.8229	-1.29167	0.327614	-3.94265	8.0585e-05	0.000664026	DCP1A	55802	0.00110291	63	78	93	31	33	30
1888	ENSG00000167191	117.05	0.984599	0.249809	3.9414	8.10067e-05	0.000667147	GPRC5B	51704	0.00110809	78	98	62	167	181	116
1889	ENSG00000185745	46.5929	1.27876	0.324512	3.94058	8.12834e-05	0.000669072	IFIT1	3434	0.00111129	33	24	24	61	69	68
1890	ENSG00000134962	12.2221	2.78701	0.707364	3.94	8.14829e-05	0.000670359	KLB	152831	0.00111343	1	3	6	12	31	20
1891	ENSG00000135446	322.916	-0.650104	0.165025	-3.93944	8.16726e-05	0.000671253	CDK4	1019	0.00111491	404	425	354	260	245	249
1892	ENSG00000169504	406.676	-0.811936	0.206105	-3.93942	8.16779e-05	0.000671253	CLIC4	25932	0.00111491	521	549	495	314	380	181
1893	ENSG00000197982	193.56	0.73877	0.18757	3.93863	8.19498e-05	0.000673131	C1orf122	127687	0.00111803	152	149	132	263	218	247
1894	ENSG00000147862	153.158	-0.814894	0.207031	-3.93609	8.28191e-05	0.000679912	NFIB	4781	0.0011293	185	218	184	113	111	108
1895	ENSG00000274180	31.5534	1.66105	0.422193	3.93434	8.34252e-05	0.000684527	NATD1	256302	0.00113696	9	14	23	37	49	58
1896	ENSG00000065923	156.863	0.835417	0.212363	3.9339	8.35774e-05	0.000685414	SLC9A7	84679	0.00113843	133	107	100	188	234	179
1897	ENSG00000264940	7.85874	4.57647	1.16351	3.93334	8.37744e-05	0.000686668	SNORD3C	780853	0.00114052	2	0	0	19	4	23
1898	ENSG00000050748	290.126	-0.726069	0.184622	-3.93274	8.39832e-05	0.000688016	MAPK9	5601	0.00114276	396	334	362	227	254	169
1899	ENSG00000198816	101.852	0.945309	0.24041	3.93207	8.42163e-05	0.000689562	ZNF358	140467	0.00114532	65	71	70	131	110	164
1900	ENSG00000142687	410.393	0.610492	0.155268	3.93187	8.42885e-05	0.000689791	KIAA0319L	79932	0.0011457	367	303	305	508	499	481
1901	ENSG00000181513	68.8707	1.0943	0.278339	3.93153	8.44087e-05	0.000690411	ACBD4	79777	0.00114673	43	46	40	78	86	118
1902	ENSG00000202354	7.65209	4.12789	1.05032	3.93013	8.49e-05	0.000694064	RNY3	6085	0.0011528	1	1	1	30	6	8
1903	ENSG00000108375	63.992	1.14332	0.290948	3.92964	8.50741e-05	0.000695122	RNF43	54894	0.00115456	38	39	41	91	67	108
1904	ENSG00000189043	1747.69	0.643349	0.163797	3.92772	8.57544e-05	0.000700312	NDUFA4	4697	0.00116318	1362	1154	1576	2595	1797	2002
1905	ENSG00000067064	582.223	0.610817	0.15552	3.92757	8.58084e-05	0.000700386	IDI1	3422	0.0011633	500	488	398	642	787	680
1906	ENSG00000117305	141.571	0.90465	0.230372	3.92692	8.60419e-05	0.000701923	HMGCL	3155	0.00116585	86	82	127	192	164	199
1907	ENSG00000147536	81.9605	-1.12236	0.285897	-3.92576	8.6458e-05	0.000704948	GINS4	84296	0.00117088	116	137	85	56	55	43
1908	ENSG00000167842	72.3948	-1.1594	0.295414	-3.92467	8.6848e-05	0.000707711	MIS12	79003	0.00117547	105	95	105	44	58	28
1909	ENSG00000124614	17.6422	2.59848	0.662106	3.92456	8.68879e-05	0.000707711	RPS10	6204	0.00117547	3	7	5	31	7	53
1910	ENSG00000072736	106.076	-0.936289	0.238748	-3.92167	8.79379e-05	0.000715888	NFATC3	4775	0.00118905	149	142	129	77	79	60
1911	ENSG00000089902	217.637	-0.773327	0.197207	-3.9214	8.80343e-05	0.000716298	RCOR1	23186	0.00118973	314	240	274	159	183	136
1912	ENSG00000159596	87.1657	0.949602	0.242687	3.91286	9.12097e-05	0.000741747	TMEM69	51249	0.001232	60	59	60	110	125	108
1913	ENSG00000126777	1040.05	-0.647352	0.165502	-3.91145	9.1742e-05	0.000745686	KTN1	3895	0.00123854	1326	1162	1332	799	997	625
1914	ENSG00000111880	108.537	-0.96681	0.247187	-3.91124	9.18229e-05	0.000745953	RNGTT	8732	0.00123899	172	132	127	82	74	63
1915	ENSG00000148702	94.672	1.23964	0.317046	3.90998	9.23044e-05	0.000749473	HABP2	3026	0.00124483	61	29	80	169	116	113
1916	ENSG00000170689	64.3436	-1.25309	0.320497	-3.90983	9.23603e-05	0.000749536	HOXB9	3219	0.00124494	72	92	109	24	44	45
1917	ENSG00000115295	96.0529	0.933443	0.23876	3.90955	9.24695e-05	0.000750031	CLIP4	79745	0.00124576	72	70	58	119	138	121
1918	ENSG00000120314	193.806	0.720934	0.184433	3.90891	9.2712e-05	0.000751605	WDR55	54853	0.00124837	144	154	138	246	220	259
1919	ENSG00000137942	195.348	-0.763526	0.195362	-3.90825	9.29665e-05	0.000753275	FNBP1L	54874	0.00125115	248	231	263	148	163	118
1920	ENSG00000143390	270.102	0.64993	0.166335	3.90736	9.33109e-05	0.000755672	RFX5	5993	0.00125513	224	192	215	338	324	327
1921	ENSG00000168411	311.415	-0.743722	0.190437	-3.90535	9.40889e-05	0.000761576	RFWD3	55159	0.00126493	395	468	309	227	253	217
1922	ENSG00000116539	226.846	-0.723483	0.185263	-3.90517	9.41591e-05	0.000761748	ASH1L	693140	0.00126522	295	291	266	180	188	141
1923	ENSG00000044090	113.887	0.907756	0.232467	3.90488	9.42722e-05	0.000762267	CUL7	9820	0.00126608	90	78	68	167	126	154
1924	ENSG00000087995	216.1	-0.732601	0.187651	-3.90407	9.45899e-05	0.000764388	METTL2A	339175	0.0012696	272	274	265	190	161	133
1925	ENSG00000162783	256.372	0.7333	0.187835	3.90396	9.46329e-05	0.000764388	IER5	51278	0.0012696	187	206	180	297	271	398
1926	ENSG00000103044	73.7339	1.09412	0.280311	3.90325	9.491e-05	0.000765894	HAS3	3038	0.00127211	58	46	35	101	90	111
1927	ENSG00000132475	1724.27	-0.489774	0.125479	-3.90323	9.49178e-05	0.000765894	H3F3B	100616282	0.00127211	1900	1983	2163	1346	1523	1430
1928	ENSG00000276850	157.166	0.793495	0.203409	3.90098	9.58031e-05	0.000772636	CH17-360D5.2	NA	0.0012833	108	134	103	209	197	191
1929	ENSG00000173894	68.5473	-1.21064	0.310445	-3.8997	9.63122e-05	0.000776339	CBX2	84733	0.00128946	98	115	73	52	35	38
1930	ENSG00000179241	95.3069	-0.965719	0.247674	-3.89916	9.65284e-05	0.000777679	LDLRAD3	143458	0.00129168	132	132	115	72	62	60
1931	ENSG00000119899	104.347	0.886327	0.22745	3.89681	9.74682e-05	0.000784844	SLC17A5	26503	0.00130358	78	74	68	134	145	126
1932	ENSG00000137404	92.1277	-0.999465	0.256501	-3.89653	9.75794e-05	0.000785332	NRM	11270	0.00130439	117	133	115	68	51	68
1933	ENSG00000184226	285.623	-0.712258	0.182903	-3.89418	9.85313e-05	0.000792583	PCDH9	5101	0.00131644	362	358	351	185	264	194
1934	ENSG00000079308	119.034	-1.01141	0.259814	-3.89283	9.908e-05	0.000796585	TNS1	7145	0.00132308	199	153	123	91	64	86
1935	ENSG00000275395	117.639	-1.18984	0.305665	-3.89261	9.91709e-05	0.000796886	FCGBP	8857	0.00132358	232	101	154	68	56	96
1936	ENSG00000175785	36.7445	-1.9841	0.509726	-3.89249	9.922e-05	0.000796886	PRIMA1	145270	0.00132358	82	38	54	30	4	13
1937	ENSG00000184319	67.7696	1.04253	0.267844	3.89231	9.92933e-05	0.000797063	RPL23AP82	NA	0.00132388	43	47	42	91	92	91
1938	ENSG00000167705	73.4958	1.09158	0.28049	3.89168	9.95512e-05	0.000798635	RILP	83547	0.00132649	39	55	44	105	79	118
1939	ENSG00000166949	820.045	0.681547	0.175134	3.89158	9.95919e-05	0.000798635	SMAD3	4088	0.00132649	521	794	575	856	1106	1068
1940	ENSG00000110721	134.559	-0.905558	0.232934	-3.88761	0.000101236	0.000811405	CHKA	1119	0.0013477	198	174	159	87	116	73
1941	ENSG00000228695	10.025	3.63549	0.93543	3.88644	0.000101727	0.000814917	CES1P1	51716	0.00135353	2	1	1	31	2	23
1942	ENSG00000182704	1131.36	0.494065	0.127167	3.88517	0.000102256	0.000818735	TSKU	25987	0.00135987	995	955	867	1346	1278	1347
1943	ENSG00000134748	147.364	-0.827664	0.213081	-3.88427	0.000102637	0.000821359	PRPF38A	84950	0.00136423	193	164	207	110	99	111
1944	ENSG00000176422	129.835	0.852638	0.219532	3.8839	0.000102796	0.000822207	SPRYD4	283377	0.00136564	84	109	84	160	156	186
1945	ENSG00000241837	449.524	0.736866	0.189885	3.88059	0.000104206	0.000833055	ATP5O	539	0.00138366	338	271	399	586	442	662
1946	ENSG00000184863	251.635	-0.680126	0.175313	-3.8795	0.000104673	0.000835971	RBM33	155435	0.0013885	306	320	301	173	191	219
1947	ENSG00000236060	157.331	0.884426	0.227975	3.87949	0.000104678	0.000835971	HSPB1P1	NA	0.0013885	98	127	103	209	152	254
1948	ENSG00000124831	575.646	-0.546227	0.140826	-3.87875	0.000104995	0.000837914	LRRFIP1	9208	0.00139173	668	660	720	487	443	476
1949	ENSG00000048392	209.434	0.852973	0.21992	3.87856	0.000105078	0.000837914	RRM2B	50484	0.00139173	143	149	162	262	356	186
1950	ENSG00000165244	23.6438	-2.09108	0.53914	-3.87855	0.000105083	0.000837914	ZNF367	195828	0.00139173	48	45	23	9	12	5
1951	ENSG00000261578	122.294	0.935917	0.241377	3.87741	0.000105575	0.00084141	RP11-21L23.2	NA	0.00139753	93	60	97	159	143	181
1952	ENSG00000215333	12.4288	3.09869	0.799454	3.87601	0.000106185	0.000845838	KRT18P23	NA	0.00140489	1	5	2	31	5	30
1953	ENSG00000060971	291.225	0.642058	0.165687	3.87513	0.000106569	0.000848459	ACAA1	30	0.00140924	234	214	233	389	323	355
1954	ENSG00000184007	1285.18	-0.573171	0.147918	-3.87491	0.000106663	0.000848774	PTP4A2	8073	0.00140976	1571	1415	1635	1069	1177	844
1955	ENSG00000005059	65.2289	-1.14099	0.294548	-3.8737	0.000107196	0.00085258	MCUB	55013	0.00141609	85	89	97	35	47	38
1956	ENSG00000106459	82.4631	-1.05287	0.27185	-3.87299	0.000107509	0.000854628	NRF1	4899	0.00141949	102	127	101	51	47	65
1957	ENSG00000171631	58.6955	1.29938	0.335561	3.87226	0.00010783	0.000856747	P2RY6	5031	0.00142301	46	24	30	65	72	116
1958	ENSG00000123908	312.238	-0.724832	0.18724	-3.87113	0.000108331	0.000860287	AGO2	27161	0.00142889	432	427	311	218	263	222
1959	ENSG00000188636	270.228	-0.729495	0.188476	-3.87049	0.000108619	0.00086213	LDOC1L	84247	0.00143195	359	350	309	197	245	161
1960	ENSG00000196205	6174.57	-0.488386	0.126192	-3.87017	0.000108761	0.000862818	EEF1A1P5	NA	0.00143309	7083	6801	7750	5677	5155	4581
1961	ENSG00000197780	85.8552	0.973889	0.251669	3.86972	0.000108961	0.000863966	TAF13	6884	0.001435	65	59	51	126	119	96
1962	ENSG00000137819	364.048	-0.60476	0.156287	-3.86955	0.000109036	0.000864116	PAQR5	54852	0.00143525	452	433	434	314	287	264
1963	ENSG00000213130	9.01571	3.42634	0.88563	3.86882	0.000109365	0.000865964	EEF1DP5	NA	0.00143832	1	1	3	16	6	28
1964	ENSG00000198860	211.355	-0.761779	0.196904	-3.86878	0.00010938	0.000865964	TSEN15	116461	0.00143832	232	252	315	160	162	146
1965	ENSG00000197165	16.5355	2.16561	0.559847	3.86821	0.000109637	0.000867552	SULT1A2	6799	0.00144095	5	4	9	37	24	20
1966	ENSG00000036257	313.225	-0.66853	0.172891	-3.86677	0.000110286	0.000872247	CUL3	8452	0.00144875	417	384	357	222	278	222
1967	ENSG00000177479	285.189	-0.657072	0.170353	-3.85712	0.00011473	0.00090693	ARIH2	10425	0.00150636	363	361	321	202	220	244
1968	ENSG00000124370	49.0895	1.32182	0.342783	3.85614	0.000115191	0.000910116	MCEE	84693	0.00151165	19	25	40	80	65	65
1969	ENSG00000120149	189.406	0.779291	0.202129	3.85541	0.000115538	0.00091239	MSX2	4488	0.00151543	136	149	131	279	190	252
1970	ENSG00000186297	312.847	-0.766363	0.198784	-3.85526	0.000115608	0.000912485	GABRA5	2558	0.00151559	450	370	364	302	220	171
1971	ENSG00000101146	315.057	-0.620596	0.160993	-3.85479	0.000115829	0.000913759	RAE1	8480	0.0015177	387	383	372	239	239	269
1972	ENSG00000130669	939.222	-0.54124	0.140435	-3.85402	0.000116195	0.000916184	PAK4	10298	0.00152173	1137	1215	985	816	716	766
1973	ENSG00000142227	601.985	0.593813	0.154127	3.85276	0.000116793	0.000920435	EMP3	2014	0.00152879	413	544	484	663	778	730
1974	ENSG00000143061	268.654	-0.712515	0.184955	-3.85236	0.000116983	0.00092122	IGSF3	3321	0.00153009	357	361	288	209	226	171
1975	ENSG00000095380	690.624	0.67491	0.175196	3.8523	0.000117011	0.00092122	NANS	54187	0.00153009	556	455	579	876	656	1022
1976	ENSG00000146247	139.333	-0.865212	0.224634	-3.85166	0.000117321	0.000922948	PHIP	55023	0.00153296	205	181	154	84	108	103
1977	ENSG00000012174	223.99	-0.858458	0.222884	-3.8516	0.00011735	0.000922948	MBTPS2	51360	0.00153296	362	255	255	171	190	111
1978	ENSG00000182378	216.845	-0.739238	0.192012	-3.84996	0.000118137	0.000928668	PLCXD1	55344	0.00154247	256	298	266	162	186	133
1979	ENSG00000187079	770.126	-0.731858	0.190106	-3.84974	0.000118242	0.00092903	TEAD1	7003	0.00154307	1062	1016	816	548	755	423
1980	ENSG00000106211	1816.21	0.559723	0.145459	3.84798	0.000119097	0.00093527	HSPB1	3315	0.00155343	1315	1744	1343	2053	2065	2377
1981	ENSG00000143811	239.482	0.719297	0.186985	3.84682	0.000119662	0.000939095	PYCR2	102466270	0.00155978	170	164	205	302	255	340
1982	ENSG00000020129	175.029	0.790426	0.20548	3.84673	0.000119705	0.000939095	NCDN	23154	0.00155978	126	154	105	206	226	234
1983	ENSG00000062822	174.665	-0.887674	0.230792	-3.84622	0.000119956	0.000940589	POLD1	5424	0.00156226	222	287	169	129	112	128
1984	ENSG00000164742	70.5142	-1.21362	0.31559	-3.84556	0.000120276	0.00094263	ADCY1	107	0.00156566	120	106	68	44	36	50
1985	ENSG00000105443	260.963	0.671345	0.174621	3.84459	0.000120752	0.000945878	CYTH2	9266	0.00157105	200	186	215	307	290	368
1986	ENSG00000128050	1112.71	-0.591484	0.153856	-3.8444	0.000120846	0.000946143	PAICS	10606	0.00157149	1410	1412	1201	853	1055	745
1987	ENSG00000236844	20.7524	1.89965	0.494264	3.8434	0.000121341	0.000949535	AC091633.2	NA	0.00157712	9	11	6	40	23	35
1988	ENSG00000218582	31.2893	2.10065	0.546841	3.84143	0.000122317	0.000956695	GAPDHP63	NA	0.00158902	15	9	9	45	13	96
1989	ENSG00000100263	116.591	0.892468	0.232351	3.84103	0.000122521	0.000957589	RHBDD3	25807	0.0015905	86	87	71	180	125	151
1990	ENSG00000201098	8.15471	3.57298	0.930232	3.84096	0.000122555	0.000957589	RNY1	6084	0.0015905	1	2	1	28	7	10
1991	ENSG00000111275	665.048	0.658295	0.171408	3.84051	0.00012278	0.000958867	ALDH2	217	0.00159262	453	453	639	832	710	904
1992	ENSG00000172845	198.976	-0.768338	0.200085	-3.84006	0.000123005	0.000960142	SP3	6670	0.00159474	264	255	239	143	177	116
1993	ENSG00000237214	98.9502	2.53898	0.661245	3.8397	0.000123186	0.00096107	RP11-12M9.3	NA	0.00159628	28	29	29	209	48	249
1994	ENSG00000218175	113.386	2.82716	0.736792	3.83713	0.000124481	0.000970687	AC016739.2	NA	0.00161225	29	23	32	201	51	345
1995	ENSG00000115486	370.262	0.584817	0.152438	3.83642	0.00012484	0.000973004	GGCX	2677	0.0016161	309	298	282	474	428	431
1996	ENSG00000167644	152.682	2.184	0.569493	3.83499	0.000125568	0.000978181	C19orf33	64073	0.0016247	48	63	53	244	99	408
1997	ENSG00000113407	1729.57	-0.580769	0.151463	-3.83438	0.00012588	0.000980123	TARS	6897	0.00162793	1894	1877	2456	1376	1561	1214
1998	ENSG00000023287	157.526	-0.916759	0.239147	-3.83346	0.000126355	0.000983331	RB1CC1	9821	0.00163326	230	179	217	99	145	76
1999	ENSG00000167785	42.4583	-1.44216	0.376268	-3.83279	0.000126698	0.000985026	ZNF558	148156	0.00163607	50	58	80	24	25	18
[truncated: 56,736 more rows]
