# Supplementary material for: A Non-Genetic, Cell Cycle Dependent Mechanism of Platinum Resistance in Lung Adenocarcinoma
Source: bioRxiv preprint, doi:10.1101/2020.11.26.400499, version 2 (2021-05-05)
Supplement: Supplement Table 2 [file 400499_file22.xlsx]

## Sheet: Control vs Cisplatin Big Cells
	Row.names	baseMean	log2FoldChange	lfcSE	stat	pvalue	padj	symbol	entrez	qValue	Control#1	Control#2	Control#3	Big#1	Big#2	Big#3
1	ENSG00000124762	4914.13	3.9236	0.181989	21.5596	4.3047e-103	6.89441e-99	CDKN1A	1026	1.13965e-98	576	531	716	10483	6797	10381
2	ENSG00000092621	1111.22	-3.61626	0.201393	-17.9562	4.29073e-72	3.43602e-68	PHGDH	26227	5.67973e-68	1712	2230	2222	194	198	111
3	ENSG00000196562	716.935	2.55771	0.15556	16.442	9.57641e-61	5.11253e-57	SULF2	55959	8.451e-57	205	213	207	1336	1062	1279
4	ENSG00000026103	267.52	2.90456	0.198505	14.6322	1.75131e-48	7.01225e-45	FAS	355	1.15912e-44	72	59	58	458	434	525
5	ENSG00000065618	213.577	3.60664	0.247922	14.5475	6.05864e-48	1.9407e-44	COL17A1	100126326	3.20798e-44	37	23	38	419	318	448
6	ENSG00000144452	155.079	4.13351	0.285694	14.4683	1.92191e-47	5.13022e-44	ABCA12	26154	8.48025e-44	17	13	21	278	258	343
7	ENSG00000163071	125.651	4.14189	0.311356	13.3028	2.23015e-40	5.10257e-37	SPATA18	132671	8.43454e-37	15	12	13	200	230	284
8	ENSG00000271447	279.561	2.94888	0.225054	13.103	3.16667e-39	6.33968e-36	MMP28	79148	1.04795e-35	84	44	64	443	468	575
9	ENSG00000042445	1599.69	1.7502	0.134014	13.0598	5.58748e-39	9.94323e-36	RETSAT	54884	1.64361e-35	798	657	744	2487	2366	2546
10	ENSG00000175832	353.107	-2.4053	0.186777	-12.8779	5.99168e-38	9.59628e-35	ETV4	2118	1.58626e-34	589	586	607	95	142	99
11	ENSG00000135842	129.716	-3.41177	0.274177	-12.4437	1.51418e-35	2.20464e-32	FAM129A	116496	3.64427e-32	211	254	247	17	29	22
12	ENSG00000109072	2658.76	1.88594	0.153327	12.3001	9.04161e-35	1.20675e-31	VTN	7448	1.99476e-31	1323	1051	1022	4396	3599	4561
13	ENSG00000135679	1377.91	1.91069	0.157353	12.1427	6.26871e-34	7.72305e-31	MDM2	4193	1.27662e-30	547	575	616	2584	1824	2122
14	ENSG00000012171	1911.82	2.18881	0.181584	12.054	1.84871e-33	2.11493e-30	SEMA3B	102465526	3.49597e-30	851	612	599	2659	2900	3850
15	ENSG00000172667	195.931	2.54849	0.211536	12.0476	1.99773e-33	2.13304e-30	ZMAT3	64393	3.52591e-30	54	62	56	354	287	363
16	ENSG00000152137	319.483	2.18734	0.182326	11.9969	3.68902e-33	3.69271e-30	HSPB8	26353	6.10404e-30	113	115	117	608	463	501
17	ENSG00000163453	243.603	3.56458	0.300389	11.8665	1.76659e-32	1.60224e-29	IGFBP7	3490	2.6485e-29	46	35	32	283	375	690
18	ENSG00000166851	915.696	-2.61921	0.220753	-11.8649	1.80072e-32	1.60224e-29	PLK1	5347	2.6485e-29	1633	1875	1216	244	348	177
19	ENSG00000079112	1078.78	2.51069	0.213304	11.7705	5.54122e-32	4.67096e-29	CDH17	1015	7.72108e-29	408	220	338	1436	1845	2226
20	ENSG00000166986	2228.2	-1.66526	0.142446	-11.6905	1.42556e-31	1.14159e-28	MARS	102465454	1.88704e-28	2920	3361	3884	1090	1080	1034
21	ENSG00000161513	1011.53	2.40113	0.205787	11.6681	1.85628e-31	1.41572e-28	FDXR	2232	2.34018e-28	283	361	323	2237	1187	1678
22	ENSG00000100297	998.357	-2.4601	0.213831	-11.5049	1.24623e-30	9.07256e-28	MCM5	4174	1.49969e-27	1709	2052	1308	291	408	222
23	ENSG00000187840	1051.36	-1.85504	0.161615	-11.4782	1.69867e-30	1.18287e-27	EIF4EBP1	1978	1.95528e-27	1312	1814	1817	445	476	446
24	ENSG00000166147	238.954	2.70906	0.236353	11.462	2.04838e-30	1.36695e-27	FBN1	2200	2.25957e-27	83	48	59	444	321	480
25	ENSG00000093009	182.941	-2.64032	0.230626	-11.4485	2.39324e-30	1.53321e-27	CDC45	8318	2.53439e-27	304	378	263	55	53	44
26	ENSG00000153822	518.654	2.09324	0.184247	11.3611	6.53424e-30	4.02509e-27	KCNJ16	3773	6.65347e-27	215	162	214	714	804	1003
27	ENSG00000149136	3148.52	-1.64942	0.14525	-11.3558	6.94359e-30	4.11884e-27	SSRP1	6749	6.80843e-27	4772	5197	4356	1516	1739	1312
28	ENSG00000168398	496.513	1.82697	0.161173	11.3354	8.75854e-30	4.95264e-27	BDKRB2	624	8.18671e-27	246	212	196	740	738	846
29	ENSG00000148175	1794.17	1.79828	0.158671	11.3334	8.9677e-30	4.95264e-27	STOM	2040	8.18671e-27	738	740	926	2472	2608	3281
30	ENSG00000160200	275.719	-2.98281	0.263515	-11.3193	1.05271e-29	5.62009e-27	CBS	102724560	9.29e-27	369	479	621	92	50	44
31	ENSG00000010292	1320.68	-2.02698	0.182393	-11.1133	1.08094e-28	5.58462e-26	NCAPD2	9918	9.23136e-26	2197	2418	1748	495	649	417
32	ENSG00000117399	669.668	-2.48471	0.223811	-11.1018	1.2291e-28	6.15166e-26	CDC20	991	1.01687e-25	1219	1420	770	185	257	167
33	ENSG00000274276	259.059	-2.99251	0.2697	-11.0957	1.31631e-28	6.3885e-26	CBSL	102724560	1.05602e-25	353	449	579	88	48	38
34	ENSG00000085063	1712.97	1.63731	0.14782	11.0764	1.63336e-28	7.69408e-26	CD59	966	1.27183e-25	927	707	866	2381	2829	2568
35	ENSG00000164611	647.103	-2.08734	0.188699	-11.0617	1.92351e-28	8.80199e-26	PTTG1	9232	1.45497e-25	1041	1105	996	211	329	200
36	ENSG00000131153	336.679	-2.4909	0.225699	-11.0364	2.55104e-28	1.13493e-25	GINS2	51659	1.87603e-25	570	675	469	77	140	89
37	ENSG00000108679	3100.57	1.45454	0.131991	11.02	3.05932e-28	1.32427e-25	LGALS3BP	3959	2.18902e-25	1586	1640	1748	5081	4188	4360
38	ENSG00000157456	549.836	-2.49201	0.226926	-10.9816	4.6864e-28	1.97519e-25	CCNB2	9133	3.26499e-25	901	1028	871	113	246	139
39	ENSG00000136378	93.6875	3.54608	0.323937	10.9468	6.88236e-28	2.76348e-25	ADAMTS7	11173	4.56803e-25	13	19	12	171	137	210
40	ENSG00000073111	398	-2.64063	0.241229	-10.9466	6.9018e-28	2.76348e-25	MCM2	4171	4.56803e-25	755	863	440	101	137	92
41	ENSG00000166508	1575.85	-2.32839	0.213966	-10.882	1.40398e-27	5.48444e-25	MCM7	4176	9.06576e-25	2703	3148	2034	420	726	425
42	ENSG00000076003	688.21	-2.07629	0.190945	-10.8737	1.53759e-27	5.86334e-25	MCM6	4175	9.69209e-25	1162	1268	908	231	336	225
43	ENSG00000076382	554.933	-2.06514	0.190137	-10.8613	1.76181e-27	6.56214e-25	SPAG5	10615	1.08472e-24	988	917	782	190	278	175
44	ENSG00000100526	370.274	-2.14879	0.199156	-10.7895	3.85877e-27	1.40459e-24	CDKN3	1033	2.32179e-24	629	593	590	116	183	110
45	ENSG00000132274	80.9221	5.49408	0.513371	10.702	9.9642e-27	3.54637e-24	TRIM22	10346	5.86214e-24	6	2	2	143	127	205
46	ENSG00000100889	749.076	-1.76369	0.16812	-10.4907	9.53273e-26	3.31905e-23	PCK2	5106	5.48638e-23	920	1216	1337	351	342	329
47	ENSG00000265962	173.046	2.91828	0.2788	10.4673	1.22116e-25	4.16131e-23	GACAT2	100287082	6.87864e-23	40	43	38	436	211	271
48	ENSG00000125730	8774.74	2.02627	0.194952	10.3937	2.64869e-25	8.83778e-23	C3	718	1.46088e-22	3170	4130	3076	9806	14876	17589
49	ENSG00000168350	389.831	2.36027	0.227466	10.3764	3.1765e-25	1.03826e-22	DEGS2	123099	1.71625e-22	174	88	118	520	713	725
50	ENSG00000164938	111.088	3.22237	0.313613	10.275	9.13649e-25	2.9266e-22	TP53INP1	94241	4.83766e-22	21	25	19	264	135	204
51	ENSG00000106804	1478.64	1.63397	0.159243	10.2608	1.05783e-24	3.32199e-22	C5	727	5.49124e-22	758	592	812	2059	2105	2546
52	ENSG00000065357	179.104	2.29228	0.223536	10.2547	1.1276e-24	3.473e-22	DGKA	1606	5.74087e-22	53	53	77	301	262	329
53	ENSG00000131378	148.349	2.73716	0.267021	10.2507	1.17455e-24	3.54936e-22	RFTN1	23180	5.86708e-22	45	38	33	180	283	312
54	ENSG00000044012	201.933	3.24074	0.319157	10.1541	3.17853e-24	9.42729e-22	GUCA2B	2981	1.55833e-21	49	25	42	560	219	317
55	ENSG00000171298	967.814	1.38568	0.136678	10.1383	3.73601e-24	1.08793e-21	GAA	2548	1.79834e-21	565	515	527	1386	1308	1505
56	ENSG00000101057	1126.72	-2.48376	0.245846	-10.1029	5.3621e-24	1.53356e-21	MYBL2	4605	2.53497e-21	2066	2289	1380	346	476	204
57	ENSG00000121152	223.844	-2.43942	0.241958	-10.082	6.63459e-24	1.8642e-21	NCAPH	23397	3.08152e-21	388	442	303	58	97	54
58	ENSG00000188153	374.63	2.03001	0.201543	10.0723	7.32276e-24	2.02209e-21	COL4A5	1287	3.34251e-21	174	141	126	746	491	569
59	ENSG00000166532	1276.88	1.72125	0.171403	10.0421	9.95359e-24	2.70198e-21	RIMKLB	57494	4.46636e-21	555	580	648	1607	1820	2451
60	ENSG00000197299	137.738	-2.42716	0.242212	-10.0208	1.23496e-23	3.29653e-21	BLM	641	5.44916e-21	227	251	219	38	56	36
61	ENSG00000089685	866.733	-2.3756	0.237501	-10.0025	1.4859e-23	3.90135e-21	BIRC5	332	6.44891e-21	1413	1698	1248	208	428	205
62	ENSG00000167900	860.231	-2.16165	0.217028	-9.96025	2.27491e-23	5.8766e-21	TK1	7083	9.714e-21	1378	1776	1064	337	386	220
63	ENSG00000088325	1684.48	-2.03698	0.204857	-9.94347	2.69285e-23	6.84582e-21	TPX2	22974	1.13161e-20	2807	2841	2478	657	890	433
64	ENSG00000079616	483.601	-2.06711	0.208124	-9.93212	3.01761e-23	7.55156e-21	KIF22	3835	1.24827e-20	769	870	703	137	255	167
65	ENSG00000123243	158.012	2.56613	0.258753	9.9173	3.50111e-23	8.62673e-21	ITIH5	80760	1.426e-20	37	41	60	201	317	293
66	ENSG00000182326	460.759	2.39593	0.241815	9.9081	3.83895e-23	9.31585e-21	C1S	716	1.53991e-20	153	175	113	514	744	1066
67	ENSG00000173207	605.59	-1.7819	0.180006	-9.89915	4.19814e-23	1.00354e-20	CKS1B	1163	1.65886e-20	904	1050	861	215	335	270
68	ENSG00000134057	1286.59	-1.75744	0.177892	-9.87927	5.12051e-23	1.20603e-20	CCNB1	891	1.99357e-20	1970	2142	1845	481	766	515
69	ENSG00000131080	159.194	2.4431	0.248439	9.8338	8.0525e-23	1.86911e-20	EDA2R	60401	3.08964e-20	54	36	59	283	210	314
70	ENSG00000168487	1096.44	1.41337	0.144021	9.81362	9.83706e-23	2.25072e-20	BMP1	649	3.72043e-20	618	548	629	1490	1500	1793
71	ENSG00000105202	2640.51	-1.35898	0.139008	-9.77624	1.42404e-22	3.21231e-20	FBL	2091	5.30995e-20	3594	3905	3900	1535	1643	1267
72	ENSG00000177084	446.067	-1.79659	0.184554	-9.73473	2.14377e-22	4.7687e-20	POLE	5426	7.88265e-20	753	791	534	193	213	193
73	ENSG00000132967	494.778	-1.76192	0.182697	-9.64395	5.21419e-22	1.14398e-19	HMGB1P5	NA	1.89099e-19	766	867	659	189	274	213
74	ENSG00000142945	299.067	-2.31387	0.241161	-9.59468	8.41813e-22	1.82196e-19	KIF2C	11004	3.01169e-19	526	521	447	71	151	79
75	ENSG00000080546	101.3	2.62729	0.274214	9.5812	9.59269e-22	2.04849e-19	SESN1	27244	3.38614e-19	29	32	24	153	162	208
76	ENSG00000012779	55.6231	4.11345	0.429645	9.57407	1.02774e-21	2.16583e-19	ALOX5	240	3.58012e-19	8	6	4	101	97	117
77	ENSG00000183688	259.327	-2.03786	0.21327	-9.55529	1.2324e-21	2.56339e-19	FAM101B	359845	4.23728e-19	382	480	389	88	133	84
78	ENSG00000161544	72.1062	4.4842	0.469796	9.545	1.36114e-21	2.79487e-19	CYGB	114757	4.61991e-19	3	5	11	196	80	137
79	ENSG00000169903	6443.49	1.28522	0.134873	9.5291	1.58652e-21	3.21643e-19	TM4SF4	7104	5.31674e-19	4037	3330	3880	8787	8525	10101
80	ENSG00000164104	321.648	-2.05455	0.215755	-9.52259	1.68908e-21	3.38154e-19	HMGB2	3148	5.58968e-19	470	547	538	88	169	118
81	ENSG00000187514	5686.04	-1.42769	0.149971	-9.51974	1.73616e-21	3.43287e-19	PTMA	100302285	5.67453e-19	8330	8848	7692	2759	3723	2764
82	ENSG00000141756	1545.79	1.22477	0.128968	9.49677	2.16506e-21	4.22873e-19	FKBP10	60681	6.99008e-19	974	882	922	2273	2021	2202
83	ENSG00000189060	1819.57	-1.66674	0.17637	-9.45022	3.38106e-21	6.52422e-19	H1F0	3005	1.07845e-18	2148	2631	3524	895	914	805
84	ENSG00000204257	293.302	2.46403	0.260831	9.44687	3.49115e-21	6.65647e-19	HLA-DMA	3108	1.10031e-18	79	72	120	311	557	621
85	ENSG00000090889	526.405	-2.22137	0.236342	-9.39899	5.50898e-21	1.03802e-18	KIF4A	24137	1.71585e-18	917	867	816	172	274	112
86	ENSG00000178947	131.934	2.20713	0.235106	9.38778	6.12777e-21	1.13522e-18	SMIM10L2A	NA	1.87651e-18	57	39	44	211	208	233
87	ENSG00000025770	388.684	-1.57253	0.16752	-9.38712	6.16658e-21	1.13522e-18	NCAPH2	29781	1.87651e-18	579	647	519	210	181	196
88	ENSG00000105281	3375.26	-1.35424	0.144804	-9.35218	8.58563e-21	1.56258e-18	SLC1A5	6510	2.58295e-18	4441	4529	5587	1915	2082	1697
89	ENSG00000185088	2690.47	1.48344	0.15894	9.33333	1.02596e-20	1.84627e-18	RPS27L	51065	3.05188e-18	1234	1255	1764	3828	3835	4226
90	ENSG00000138166	643.977	1.45358	0.155807	9.32939	1.06483e-20	1.89493e-18	DUSP5	1847	3.13232e-18	352	329	352	1027	801	1002
91	ENSG00000100162	172.347	-2.60043	0.279765	-9.29505	1.47136e-20	2.58959e-18	CENPM	79019	4.28058e-18	307	348	232	41	75	31
92	ENSG00000101412	305.833	-2.06718	0.222965	-9.27133	1.83847e-20	3.20055e-18	E2F1	1869	5.29049e-18	506	622	354	106	139	109
93	ENSG00000007968	110.895	-2.5236	0.272307	-9.26747	1.9062e-20	3.28276e-18	E2F2	1870	5.4264e-18	191	224	152	32	40	27
94	ENSG00000115902	445.366	-1.93001	0.209203	-9.22555	2.82112e-20	4.80671e-18	SLC1A4	6509	7.94548e-18	625	585	906	173	229	154
95	ENSG00000107796	155.467	2.50081	0.271442	9.21306	3.16963e-20	5.34367e-18	ACTA2	59	8.83307e-18	54	42	44	372	213	208
96	ENSG00000090861	4223.2	-1.39086	0.150994	-9.21135	3.22042e-20	5.37273e-18	AARS	16	8.88112e-18	5488	5715	7142	2481	2504	2010
97	ENSG00000108106	2008.43	-1.66221	0.180989	-9.18405	4.15177e-20	6.85513e-18	UBE2S	27338	1.13315e-17	3042	3659	2456	972	1149	773
98	ENSG00000132821	286.337	2.01624	0.219635	9.17995	4.31288e-20	7.04847e-18	VSTM2L	128434	1.16511e-17	114	76	150	411	477	490
99	ENSG00000178999	235.196	-2.17708	0.237908	-9.15091	5.64577e-20	9.1336e-18	AURKB	9212	1.50978e-17	348	481	326	67	115	74
100	ENSG00000169679	301.758	-2.1444	0.234428	-9.14739	5.83276e-20	9.34174e-18	BUB1	699	1.54419e-17	548	532	396	90	159	86
101	ENSG00000068489	338.282	-2.28651	0.250643	-9.12256	7.33687e-20	1.16344e-17	PRR11	55771	1.92316e-17	561	667	457	147	135	64
102	ENSG00000144028	3110.59	-1.16463	0.127793	-9.1134	7.98373e-20	1.2536e-17	SNRNP200	23020	2.0722e-17	4547	4265	4094	2024	1994	1739
103	ENSG00000166311	280.42	1.72479	0.189718	9.09133	9.78311e-20	1.52123e-17	SMPD1	6609	2.51458e-17	142	107	142	376	467	449
104	ENSG00000189403	2063.41	-1.60491	0.176726	-9.08134	1.0725e-19	1.65165e-17	HMGB1	3146	2.73018e-17	3053	3280	2984	789	1326	949
105	ENSG00000153029	101.457	2.89362	0.319124	9.06738	1.21911e-19	1.85954e-17	MR1	3140	3.07382e-17	15	20	38	224	145	167
106	ENSG00000054690	174.108	2.37141	0.262725	9.02621	1.77726e-19	2.68534e-17	PLEKHH1	57475	4.43886e-17	67	63	39	256	231	389
107	ENSG00000123384	329.927	1.51489	0.167939	9.02046	1.873e-19	2.80354e-17	LRP1	4035	4.63425e-17	171	156	186	492	454	520
108	ENSG00000174231	5883.73	-1.21884	0.135393	-9.00217	2.21293e-19	3.2817e-17	PRPF8	10594	5.42463e-17	9075	8050	7568	3736	3740	3134
109	ENSG00000228716	1192.65	-1.76512	0.196156	-8.99854	2.28745e-19	3.36108e-17	DHFR	1719	5.55586e-17	1893	1951	1684	433	750	445
110	ENSG00000123989	780.062	1.21534	0.135267	8.98473	2.59374e-19	3.77371e-17	CHPF	79586	6.23793e-17	452	497	460	1115	1081	1075
111	ENSG00000129195	142.929	-2.52632	0.281208	-8.98381	2.6154e-19	3.77371e-17	FAM64A	54478	6.23793e-17	239	300	191	28	61	38
112	ENSG00000123136	790.841	-1.26403	0.141058	-8.96107	3.21549e-19	4.59816e-17	DDX39A	10212	7.60074e-17	1107	1160	1083	430	512	454
113	ENSG00000260912	50.8177	3.80973	0.425193	8.96	3.24686e-19	4.60192e-17	RP11-363E7.4	NA	7.60696e-17	4	10	6	105	86	93
114	ENSG00000117632	1099.76	-1.82246	0.203772	-8.94365	3.76511e-19	5.28965e-17	STMN1	100500808	8.74377e-17	1765	1625	1754	371	688	396
115	ENSG00000179023	141.718	2.26495	0.253299	8.9418	3.82878e-19	5.33232e-17	KLHDC7A	127707	8.81431e-17	61	41	44	227	187	290
116	ENSG00000184575	1301.73	-1.35429	0.151783	-8.92256	4.55645e-19	6.29104e-17	XPOT	11260	1.03991e-16	1642	1860	2113	740	809	647
117	ENSG00000100342	362.103	1.7169	0.192478	8.91997	4.66407e-19	6.38459e-17	APOL1	8542	1.05537e-16	184	147	176	686	504	475
118	ENSG00000196502	245.386	1.80887	0.202916	8.91437	4.90581e-19	6.6586e-17	SULT1A1	6817	1.10066e-16	104	90	133	342	364	439
119	ENSG00000110013	318.262	1.81594	0.203846	8.9084	5.17752e-19	6.96833e-17	SIAE	54414	1.15186e-16	149	133	140	369	517	602
120	ENSG00000181143	386.355	2.27688	0.255652	8.9062	5.28117e-19	7.04861e-17	MUC16	94025	1.16513e-16	150	90	156	396	758	768
121	ENSG00000166130	506.012	1.32239	0.148524	8.90355	5.40871e-19	7.15917e-17	IKBIP	121457	1.18341e-16	294	301	272	700	769	700
122	ENSG00000167513	292.311	-2.31897	0.260535	-8.90082	5.54342e-19	7.27733e-17	CDT1	81620	1.20294e-16	441	672	349	103	124	66
123	ENSG00000135069	1979.44	-1.48288	0.166737	-8.89349	5.92175e-19	7.71079e-17	PSAT1	29968	1.27459e-16	2367	3112	3269	1226	999	904
124	ENSG00000013810	684.94	-1.56534	0.176319	-8.87791	6.81305e-19	8.79982e-17	TACC3	10460	1.45461e-16	1015	1209	847	351	393	294
125	ENSG00000159388	201.792	2.28952	0.257939	8.87623	6.9165e-19	8.86197e-17	BTG2	7832	1.46488e-16	71	75	60	478	255	272
126	ENSG00000122952	554.291	-1.72455	0.194537	-8.86486	7.65992e-19	9.73661e-17	ZWINT	11130	1.60946e-16	915	883	755	218	343	212
127	ENSG00000140525	520.061	-1.75517	0.198369	-8.84798	8.91169e-19	1.12386e-16	FANCI	55215	1.85773e-16	848	899	660	217	307	190
128	ENSG00000122966	227.441	-2.20044	0.248795	-8.84438	9.20342e-19	1.15158e-16	CIT	100302274	1.90355e-16	350	472	299	78	110	56
129	ENSG00000138180	488.863	-1.91652	0.217201	-8.82371	1.10727e-18	1.37473e-16	CEP55	55165	2.27242e-16	837	842	640	222	259	133
130	ENSG00000113739	204.632	-2.88454	0.32957	-8.75245	2.08772e-18	2.57207e-16	STC2	8614	4.25163e-16	187	324	571	63	49	35
131	ENSG00000113368	446.179	-2.02093	0.231709	-8.72185	2.73684e-18	3.34605e-16	LMNB1	4001	5.53101e-16	669	872	607	142	254	133
132	ENSG00000117650	223.534	-2.10863	0.242104	-8.70961	3.0492e-18	3.69969e-16	NEK2	4751	6.11558e-16	355	375	358	76	123	54
133	ENSG00000055163	719.417	1.72431	0.198761	8.67529	4.12486e-18	4.9672e-16	CYFIP2	26999	8.21077e-16	303	343	357	1478	848	987
134	ENSG00000174307	803.471	1.49405	0.172734	8.64944	5.17541e-18	6.18577e-16	PHLDA3	23612	1.02251e-15	399	447	417	1477	985	1095
135	ENSG00000184897	694.919	-1.40626	0.162856	-8.63502	5.8718e-18	6.96613e-16	H1FX	8971	1.1515e-15	857	1176	994	352	410	380
136	ENSG00000185339	240.346	1.6843	0.19522	8.62771	6.2594e-18	7.37136e-16	TCN2	6948	1.21848e-15	112	113	117	438	318	344
137	ENSG00000169908	8740.72	1.11545	0.129895	8.58731	8.90328e-18	1.03629e-15	TM4SF1	4071	1.71299e-15	5385	5074	6103	11199	11769	12914
138	ENSG00000075218	222.465	-2.48585	0.289491	-8.58697	8.9291e-18	1.03629e-15	GTSE1	51512	1.71299e-15	398	461	274	58	106	39
139	ENSG00000117226	111.013	2.47351	0.288584	8.5712	1.02416e-17	1.18007e-15	GBP3	2635	1.95066e-15	42	26	33	130	220	214
140	ENSG00000126005	781.598	1.17014	0.136594	8.56661	1.06574e-17	1.21921e-15	MMP24-AS1	NA	2.01535e-15	472	502	469	1065	1036	1146
141	ENSG00000120802	988.702	-1.56878	0.183456	-8.5513	1.21708e-17	1.38226e-15	TMPO	7112	2.28487e-15	1622	1482	1332	430	654	413
142	ENSG00000197746	6454.61	1.25343	0.146591	8.5505	1.22553e-17	1.38226e-15	PSAP	5660	2.28487e-15	3773	3982	3689	8772	7700	10811
143	ENSG00000100867	201.583	-1.91873	0.224611	-8.54248	1.31373e-17	1.47138e-15	DHRS2	10202	2.43218e-15	257	352	348	82	105	67
144	ENSG00000205609	6232.07	-1.19462	0.14001	-8.53239	1.43354e-17	1.59441e-15	EIF3CL	728689	2.63556e-15	8670	8738	8614	4148	4086	3136
145	ENSG00000184110	6318.67	-1.18962	0.139469	-8.52964	1.46806e-17	1.62155e-15	EIF3C	728689	2.68042e-15	8785	8832	8740	4208	4153	3194
146	ENSG00000153071	990.495	1.19856	0.140753	8.51539	1.66028e-17	1.8213e-15	DAB2	1601	3.0106e-15	657	547	599	1476	1370	1294
147	ENSG00000233695	57.1384	4.40259	0.520395	8.46009	2.6717e-17	2.89677e-15	GAS6-AS1	NA	4.78835e-15	4	4	7	68	74	185
148	ENSG00000167378	257.57	1.6371	0.193514	8.45987	2.67683e-17	2.89677e-15	IRGQ	126298	4.78835e-15	128	140	108	347	369	454
149	ENSG00000117335	2402.7	1.28539	0.152246	8.44285	3.09692e-17	3.32888e-15	CD46	4179	5.50263e-15	1598	1268	1327	3005	3281	3937
150	ENSG00000117472	145.138	2.05436	0.243366	8.44142	3.13496e-17	3.3473e-15	TSPAN1	10103	5.53307e-15	58	42	69	204	280	218
151	ENSG00000224126	333.215	-1.67397	0.198323	-8.44064	3.15609e-17	3.34755e-15	UBE2SP2	NA	5.53349e-15	509	579	434	150	198	129
152	ENSG00000198734	1070.72	1.6808	0.199505	8.42484	3.61242e-17	3.80635e-15	F5	2153	6.29188e-15	599	384	544	1231	1972	1694
153	ENSG00000111602	702.084	-1.43182	0.170005	-8.42227	3.69265e-17	3.86546e-15	TIMELESS	8914	6.38959e-15	1047	1167	860	325	432	382
154	ENSG00000109685	828.232	-1.55156	0.184329	-8.4173	3.85268e-17	4.00679e-15	WHSC1	7468	6.62321e-15	1267	1435	1003	352	518	395
155	ENSG00000198826	468.576	-2.07359	0.246504	-8.41197	4.0318e-17	4.16602e-15	ARHGAP11A	9824	6.88642e-15	835	828	608	151	271	118
156	ENSG00000011426	773.378	-2.03834	0.242484	-8.40605	4.24038e-17	4.35346e-15	ANLN	54443	7.19626e-15	1329	1437	965	275	444	191
157	ENSG00000241935	83.7918	2.58371	0.307494	8.40246	4.37235e-17	4.46035e-15	HOGA1	112817	7.37295e-15	19	20	34	131	125	174
158	ENSG00000233966	517.631	-1.66199	0.198234	-8.38395	5.11826e-17	5.18823e-15	UBE2SP1	NA	8.57614e-15	816	953	591	243	291	212
159	ENSG00000143278	49.7665	4.09007	0.488544	8.37196	5.66653e-17	5.70787e-15	F13B	2165	9.4351e-15	4	1	12	73	96	113
160	ENSG00000183684	594.568	-1.5326	0.183412	-8.35601	6.48742e-17	6.49391e-15	ALYREF	10189	1.07344e-14	827	999	825	292	382	242
161	ENSG00000012048	232.373	-2.10489	0.252016	-8.35219	6.70093e-17	6.66597e-15	BRCA1	672	1.10188e-14	402	413	316	72	131	60
162	ENSG00000106268	262.267	-1.54283	0.184815	-8.34798	6.94375e-17	6.86488e-15	NUDT1	4521	1.13476e-14	379	410	382	145	147	110
163	ENSG00000137673	174.372	1.87146	0.224959	8.3191	8.86326e-17	8.70884e-15	MMP7	4316	1.43957e-14	81	53	90	297	270	254
164	ENSG00000135451	181.662	-1.87241	0.225229	-8.31334	9.30492e-17	9.08705e-15	TROAP	10024	1.50209e-14	286	301	268	57	102	76
165	ENSG00000158402	82.9544	-2.29619	0.276332	-8.30954	9.6075e-17	9.32568e-15	CDC25C	995	1.54153e-14	135	146	133	25	31	29
166	ENSG00000250337	69.987	2.91028	0.35067	8.2992	1.04815e-16	1.01127e-14	LINC01021	643401	1.67163e-14	14	17	19	111	89	170
167	ENSG00000181634	42.5896	3.87258	0.467016	8.29217	1.11198e-16	1.06644e-14	TNFSF15	9966	1.76282e-14	7	3	6	92	70	78
168	ENSG00000115163	137.884	-2.34132	0.282633	-8.28397	1.19138e-16	1.13578e-14	CENPA	1058	1.87745e-14	215	264	212	27	70	40
169	ENSG00000139112	674.04	1.66877	0.201572	8.27879	1.24432e-16	1.17923e-14	GABARAPL1	23710	1.94927e-14	318	267	384	763	1031	1283
170	ENSG00000169607	126.476	-2.48959	0.300826	-8.27585	1.27547e-16	1.20164e-14	CKAP2L	150468	1.98632e-14	232	223	189	23	64	29
171	ENSG00000156970	219.609	-1.96619	0.238924	-8.22934	1.88241e-16	1.76308e-14	BUB1B	701	2.91437e-14	404	382	262	80	119	71
172	ENSG00000054392	76.5029	2.39943	0.29257	8.20123	2.37937e-16	2.21558e-14	HHAT	55733	3.66235e-14	27	20	27	134	112	139
173	ENSG00000114378	1865.1	1.29476	0.15798	8.19573	2.49076e-16	2.30589e-14	HYAL1	3373	3.81164e-14	1316	998	925	2850	2438	2663
174	ENSG00000143217	43.3858	4.18217	0.510764	8.18808	2.65416e-16	2.44305e-14	NECTIN4	81607	4.03836e-14	2	6	6	80	59	108
175	ENSG00000138207	366.928	2.26895	0.277496	8.1765	2.92204e-16	2.67426e-14	RBP4	5950	4.42054e-14	137	105	137	302	735	786
176	ENSG00000128272	3929.26	-1.44217	0.176456	-8.17302	3.00772e-16	2.73703e-14	ATF4	468	4.5243e-14	4623	5205	7406	2345	1884	2112
177	ENSG00000139508	192.609	1.93426	0.238485	8.11062	5.03629e-16	4.55713e-14	SLC46A3	283537	7.53293e-14	90	54	96	362	302	252
178	ENSG00000101255	2005.86	-1.83933	0.226837	-8.10858	5.12164e-16	4.60833e-14	TRIB3	57761	7.61756e-14	2229	2761	4417	1084	878	666
179	ENSG00000179222	2463.88	1.09263	0.13487	8.10141	5.43276e-16	4.86095e-14	MAGED1	9500	8.03514e-14	1693	1411	1615	3059	3437	3568
180	ENSG00000095539	690.995	1.24978	0.154607	8.0836	6.28818e-16	5.59508e-14	SEMA4G	57715	9.24866e-14	468	348	411	1017	936	965
181	ENSG00000149929	170.445	-1.70084	0.210455	-8.08172	6.38586e-16	5.6506e-14	HIRIP3	8479	9.34044e-14	244	283	255	71	95	75
182	ENSG00000168393	421.136	-1.58628	0.196317	-8.08021	6.46564e-16	5.65901e-14	DTYMK	1841	9.35433e-14	630	769	497	186	248	198
183	ENSG00000130066	1257.79	1.54221	0.190863	8.0802	6.46603e-16	5.65901e-14	SAT1	6303	9.35433e-14	593	628	707	1440	1687	2490
184	ENSG00000140519	92.2038	2.05929	0.255062	8.0737	6.81969e-16	5.93609e-14	RHCG	51458	9.81235e-14	34	38	35	147	148	151
185	ENSG00000126787	376.666	-2.19194	0.271563	-8.0716	6.93854e-16	6.0069e-14	DLGAP5	9787	9.92939e-14	653	641	559	90	226	91
186	ENSG00000136938	1581.41	-1.27143	0.157595	-8.06768	7.16458e-16	6.16924e-14	ANP32B	10541	1.01977e-13	2116	2205	2388	831	1135	814
187	ENSG00000077312	763.186	-1.11202	0.138417	-8.03383	9.44789e-16	8.09184e-14	SNRPA	6626	1.33758e-13	980	1075	1076	455	500	494
188	ENSG00000099901	1314.79	-1.22811	0.152881	-8.03313	9.50146e-16	8.09443e-14	RANBP1	5902	1.33801e-13	1698	2112	1719	893	764	703
189	ENSG00000101224	2104.89	-1.25934	0.156962	-8.02318	1.03042e-15	8.71517e-14	CDC25B	994	1.44062e-13	3201	3174	2534	1258	1418	1045
190	ENSG00000175063	567.268	-2.03046	0.253087	-8.02277	1.03389e-15	8.71517e-14	UBE2C	11065	1.44062e-13	888	1109	737	180	343	147
191	ENSG00000096060	168.355	-1.81799	0.226634	-8.02171	1.04287e-15	8.74479e-14	FKBP5	2289	1.44551e-13	265	259	263	93	77	52
192	ENSG00000143476	310.045	-1.8156	0.226582	-8.013	1.1194e-15	9.33766e-14	DTL	51514	1.54351e-13	473	575	401	132	183	96
193	ENSG00000087586	1130.82	-1.47884	0.184939	-7.99634	1.2817e-15	1.06361e-13	AURKA	6790	1.75814e-13	1785	1782	1425	561	767	464
194	ENSG00000146918	336.653	-1.70297	0.213691	-7.96931	1.5956e-15	1.31727e-13	NCAPG2	54892	2.17745e-13	556	574	415	136	210	129
195	ENSG00000140545	574.467	1.80671	0.226868	7.9637	1.6697e-15	1.37138e-13	MFGE8	4240	2.26688e-13	247	275	245	1288	624	769
196	ENSG00000048392	428.082	1.40223	0.176208	7.9578	1.75118e-15	1.43097e-13	RRM2B	50484	2.36539e-13	222	232	251	751	545	567
197	ENSG00000189334	267.295	-2.00946	0.252674	-7.95279	1.82354e-15	1.48253e-13	S100A14	57402	2.45062e-13	426	365	495	147	111	60
198	ENSG00000064205	177	2.3598	0.296915	7.94773	1.89957e-15	1.53654e-13	WISP2	8839	2.5399e-13	87	52	34	346	199	344
199	ENSG00000134684	2090.45	-1.40091	0.176308	-7.94583	1.92896e-15	1.55248e-13	YARS	8565	2.56624e-13	2631	2946	3521	1418	1116	910
200	ENSG00000171241	375.801	-1.91517	0.241223	-7.93941	2.03147e-15	1.6268e-13	SHCBP1	79801	2.6891e-13	678	644	460	151	220	101
201	ENSG00000164032	1887.17	-1.35662	0.170939	-7.93628	2.08334e-15	1.66004e-13	H2AFZ	3015	2.74404e-13	2773	2887	2482	895	1359	926
202	ENSG00000155561	772.276	-1.31106	0.165268	-7.93294	2.14025e-15	1.69694e-13	NUP205	23165	2.80504e-13	1189	1222	891	480	450	401
203	ENSG00000125845	1732.14	1.66233	0.209612	7.93049	2.18289e-15	1.72222e-13	BMP2	650	2.84683e-13	978	738	778	1698	3242	2958
204	ENSG00000188985	226.318	-1.75191	0.220974	-7.92816	2.22424e-15	1.74519e-13	DHFRP1	NA	2.88479e-13	353	394	299	90	138	84
205	ENSG00000065328	215.196	-2.25537	0.284495	-7.92762	2.23379e-15	1.74519e-13	MCM10	55388	2.88479e-13	368	475	224	63	106	55
206	ENSG00000168078	373.739	-1.87972	0.237187	-7.92505	2.28054e-15	1.77306e-13	PBK	55872	2.93087e-13	656	619	488	145	230	105
207	ENSG00000138160	532.341	-2.05644	0.259729	-7.91765	2.42035e-15	1.87014e-13	KIF11	3832	3.09134e-13	944	933	697	162	327	130
208	ENSG00000135476	176.035	-1.83253	0.231461	-7.91722	2.42876e-15	1.87014e-13	ESPL1	9700	3.09134e-13	287	311	226	63	100	70
209	ENSG00000161800	484.972	-1.7446	0.220723	-7.90405	2.69987e-15	2.06895e-13	RACGAP1	29127	3.41997e-13	836	802	603	194	310	165
210	ENSG00000104763	1233.83	1.2392	0.156823	7.9019	2.74673e-15	2.09484e-13	ASAH1	427	3.46277e-13	781	658	764	1429	1832	1939
211	ENSG00000174371	323.034	-1.99695	0.252768	-7.90033	2.78164e-15	2.11141e-13	EXO1	9156	3.49015e-13	561	586	402	123	186	79
212	ENSG00000105048	379.797	-1.40266	0.177614	-7.89721	2.85223e-15	2.15478e-13	TNNT1	7138	3.56185e-13	562	520	572	235	227	164
213	ENSG00000170855	669.656	1.14356	0.144868	7.89382	2.93086e-15	2.20378e-13	TRIAP1	51499	3.64285e-13	425	386	441	942	848	976
214	ENSG00000120805	923.467	1.12986	0.143271	7.88619	3.11559e-15	2.33174e-13	ARL1	400	3.85436e-13	604	516	618	1170	1288	1345
215	ENSG00000145833	1086.32	-1.06731	0.135485	-7.87768	3.33509e-15	2.48441e-13	DDX46	9879	4.10672e-13	1525	1437	1450	657	774	674
216	ENSG00000129003	373.877	1.23985	0.157435	7.87535	3.39794e-15	2.5166e-13	VPS13C	54832	4.15994e-13	233	226	208	531	500	545
217	ENSG00000050165	124.007	1.84966	0.23488	7.87492	3.40973e-15	2.5166e-13	DKK3	27122	4.15994e-13	46	55	61	215	169	198
218	ENSG00000168883	802.621	-1.11001	0.140998	-7.8725	3.47633e-15	2.55399e-13	USP39	10713	4.22174e-13	1098	1110	1083	522	550	453
219	ENSG00000113732	1650.77	0.973915	0.123784	7.86783	3.60847e-15	2.63896e-13	ATP6V0E1	8992	4.3622e-13	1131	1066	1144	2277	2143	2144
220	ENSG00000118785	5232.77	1.10835	0.140901	7.86617	3.65669e-15	2.66207e-13	SPP1	6696	4.4004e-13	3276	2975	3697	6530	6853	8066
221	ENSG00000111665	221.581	-2.11993	0.269602	-7.8632	3.74428e-15	2.70362e-13	CDCA3	83461	4.46908e-13	383	432	265	65	125	59
222	ENSG00000120889	1529.63	1.08728	0.138277	7.8631	3.74753e-15	2.70362e-13	TNFRSF10B	8795	4.46908e-13	975	987	975	2120	1814	2307
223	ENSG00000237649	200.774	-2.02155	0.257369	-7.85466	4.00851e-15	2.87893e-13	KIFC1	3833	4.75887e-13	322	391	253	67	114	57
224	ENSG00000163171	240.606	1.38207	0.17626	7.84113	4.46501e-15	3.19248e-13	CDC42EP3	10602	5.27716e-13	137	137	125	332	352	360
225	ENSG00000136010	260.595	-1.49161	0.190466	-7.83135	4.82676e-15	3.4358e-13	ALDH1L2	160428	5.67937e-13	366	417	371	166	123	121
226	ENSG00000136824	383.715	-1.67809	0.214461	-7.82467	5.08971e-15	3.60694e-13	SMC2	10592	5.96226e-13	625	585	543	160	255	133
227	ENSG00000136003	705.67	1.14976	0.147327	7.80415	5.99036e-15	4.2265e-13	ISCU	23479	6.9864e-13	388	454	474	992	909	1018
228	ENSG00000102316	1754.35	1.13776	0.145987	7.79358	6.51385e-15	4.5757e-13	MAGED2	10916	7.56362e-13	1122	1014	1154	2142	2293	2802
229	ENSG00000187185	135.983	1.75271	0.224943	7.79179	6.60643e-15	4.62046e-13	CTD-2600O9.1	NA	7.63761e-13	53	70	65	213	189	227
230	ENSG00000117724	869.234	-1.90405	0.244839	-7.77675	7.44122e-15	5.18167e-13	CENPF	1063	8.5653e-13	1479	1427	1209	258	577	265
231	ENSG00000163956	1337.3	1.0233	0.131688	7.77069	7.80603e-15	5.41218e-13	LRPAP1	4043	8.94633e-13	919	814	913	1807	1689	1881
232	ENSG00000116717	197.152	2.01949	0.26004	7.76607	8.09608e-15	5.56763e-13	GADD45A	1647	9.20327e-13	46	80	109	296	281	371
233	ENSG00000148346	377.139	1.65271	0.212814	7.76601	8.09976e-15	5.56763e-13	LCN2	3934	9.20327e-13	122	235	189	570	521	625
234	ENSG00000092470	146.883	-2.18661	0.281811	-7.75915	8.54985e-15	5.8519e-13	WDR76	79968	9.67318e-13	265	281	176	42	78	39
235	ENSG00000145386	298.82	-1.99218	0.25714	-7.74744	9.37614e-15	6.39014e-13	CCNA2	890	1.05629e-12	534	525	373	97	182	81
236	ENSG00000029993	1314.09	-1.13296	0.146599	-7.72832	1.08976e-14	7.38149e-13	HMGB3	3149	1.22016e-12	1812	1813	1790	842	937	690
237	ENSG00000168306	191.984	-1.8988	0.245703	-7.72802	1.09229e-14	7.38149e-13	ACOX2	8309	1.22016e-12	315	281	312	56	119	70
238	ENSG00000180398	1347.76	1.05127	0.136101	7.72418	1.12571e-14	7.57538e-13	MCFD2	90411	1.25221e-12	940	917	775	1900	1783	1773
239	ENSG00000162591	63.703	2.60108	0.337052	7.71714	1.18966e-14	7.9722e-13	MEGF6	1953	1.3178e-12	15	22	17	117	80	130
240	ENSG00000182752	327.632	1.37835	0.178726	7.71207	1.23793e-14	8.26115e-13	PAPPA	5069	1.36557e-12	198	161	187	517	404	499
241	ENSG00000148926	271.722	1.48128	0.192321	7.70212	1.33825e-14	8.89353e-13	ADM	133	1.4701e-12	144	137	149	363	350	488
242	ENSG00000151725	139.012	-2.11313	0.274645	-7.69403	1.42566e-14	9.39761e-13	CENPU	79682	1.55342e-12	221	223	233	49	78	30
243	ENSG00000137310	166.784	-2.36984	0.308011	-7.69402	1.42584e-14	9.39761e-13	TCF19	6941	1.55342e-12	310	338	190	37	88	38
244	ENSG00000110063	218.578	-1.48431	0.193124	-7.6858	1.52048e-14	9.98036e-13	DCPS	28960	1.64975e-12	302	311	354	97	124	124
245	ENSG00000259781	221.518	-1.65466	0.215408	-7.68154	1.57183e-14	1.02753e-12	RP11-673C5.1	NA	1.69851e-12	339	361	308	79	138	105
246	ENSG00000182220	1119.89	1.13684	0.148157	7.67322	1.67728e-14	1.092e-12	ATP6AP2	10159	1.80508e-12	768	580	752	1571	1515	1533
247	ENSG00000167325	1163.97	-1.34615	0.175575	-7.66712	1.75898e-14	1.13993e-12	RRM1	6240	1.8843e-12	1817	1804	1391	617	809	546
248	ENSG00000197565	147.761	1.74861	0.228079	7.66667	1.76513e-14	1.13993e-12	COL4A6	1288	1.8843e-12	65	75	64	276	215	193
249	ENSG00000141499	344.601	-1.47677	0.192708	-7.66328	1.81243e-14	1.16578e-12	WRAP53	55135	1.92703e-12	526	550	444	153	230	164
250	ENSG00000047346	131.802	1.89145	0.247006	7.65751	1.89577e-14	1.2145e-12	FAM214A	56204	2.00757e-12	58	41	69	245	187	191
251	ENSG00000095383	958.852	1.02727	0.134477	7.63904	2.1884e-14	1.39639e-12	TBC1D2	55357	2.30823e-12	652	628	613	1384	1209	1268
252	ENSG00000134690	234.239	-1.78918	0.234468	-7.63082	2.33272e-14	1.48258e-12	CDCA8	55143	2.45069e-12	345	423	322	88	148	80
253	ENSG00000049541	480.141	-1.42057	0.186261	-7.62678	2.40696e-14	1.52371e-12	RFC2	5982	2.51869e-12	691	786	620	201	314	270
254	ENSG00000162695	151.45	1.59812	0.209676	7.62185	2.50069e-14	1.57681e-12	SLC30A7	148867	2.60647e-12	82	78	65	223	236	224
255	ENSG00000149503	369.304	-1.76836	0.23245	-7.6075	2.79454e-14	1.75519e-12	INCENP	3619	2.90133e-12	610	733	369	173	190	140
256	ENSG00000137807	525.264	-1.66598	0.220037	-7.5714	3.69222e-14	2.30995e-12	KIF23	9493	3.81834e-12	834	912	650	195	354	207
257	ENSG00000183856	294.823	-1.75291	0.231549	-7.57037	3.72171e-14	2.31933e-12	IQGAP3	128239	3.83385e-12	506	500	358	118	186	100
258	ENSG00000100031	1561.2	1.07067	0.141553	7.56371	3.91729e-14	2.43176e-12	GGT1	102724197	4.01969e-12	1073	858	1090	2027	2105	2214
259	ENSG00000072501	1499.72	-1.07464	0.14218	-7.55825	4.0852e-14	2.5262e-12	SMC1A	8243	4.1758e-12	2276	2070	1755	962	1004	931
260	ENSG00000085840	163.98	-2.25743	0.299559	-7.53583	4.85225e-14	2.98899e-12	ORC1	4998	4.94079e-12	292	353	169	41	83	47
261	ENSG00000147274	1950.65	-0.968676	0.128596	-7.53268	4.9709e-14	3.05034e-12	RBMX	27316	5.04221e-12	2519	2649	2578	1228	1449	1281
262	ENSG00000146054	96.4899	-2.09061	0.277926	-7.52216	5.38774e-14	3.29351e-12	TRIM7	81786	5.44417e-12	178	147	144	31	51	29
263	ENSG00000170581	233.039	1.81543	0.241377	7.52112	5.43105e-14	3.30737e-12	STAT2	6773	5.46707e-12	95	102	112	251	342	496
264	ENSG00000174547	665.825	-1.07371	0.142871	-7.51525	5.68004e-14	3.44589e-12	MRPL11	65003	5.69605e-12	892	950	866	396	459	432
265	ENSG00000144554	189.023	-1.71115	0.227727	-7.51404	5.73311e-14	3.46496e-12	FANCD2	2177	5.72758e-12	291	342	235	67	101	98
266	ENSG00000120699	226.374	-1.42857	0.190136	-7.51338	5.76181e-14	3.46922e-12	EXOSC8	11340	5.73461e-12	310	317	364	105	132	130
267	ENSG00000166451	193.313	-1.76714	0.235215	-7.51289	5.78372e-14	3.46936e-12	CENPN	55839	5.73485e-12	305	341	250	82	118	65
268	ENSG00000137812	125.981	-2.03865	0.271548	-7.50754	6.02496e-14	3.60059e-12	KNL1	57082	5.95176e-12	244	207	156	48	66	35
269	ENSG00000139178	321.475	1.28137	0.171115	7.48835	6.97448e-14	4.15254e-12	C1RL	51279	6.86413e-12	188	197	177	449	408	510
270	ENSG00000105323	4036.66	-1.06907	0.142806	-7.48614	7.09283e-14	4.20736e-12	HNRNPUL1	11100	6.95476e-12	5485	5930	4987	2786	2822	2210
271	ENSG00000164237	500.798	1.12103	0.149942	7.47643	7.63675e-14	4.51329e-12	CMBL	134147	7.46046e-12	306	294	347	673	673	712
272	ENSG00000092853	112.285	-2.33995	0.31329	-7.46896	8.0832e-14	4.75958e-12	CLSPN	63967	7.86757e-12	197	250	115	31	50	31
273	ENSG00000164342	46.0137	2.85046	0.381975	7.46241	8.49516e-14	4.98383e-12	TLR3	7098	8.23826e-12	13	10	10	68	87	88
274	ENSG00000146670	346.284	-1.95502	0.264015	-7.40494	1.31208e-13	7.66946e-12	CDCA5	113130	1.26776e-11	562	671	418	88	214	125
275	ENSG00000204392	401.066	-1.15664	0.156273	-7.40143	1.34723e-13	7.82809e-12	LSM2	57819	1.29398e-11	516	584	561	253	234	258
276	ENSG00000138092	192.367	-1.67142	0.225829	-7.40126	1.349e-13	7.82809e-12	CENPO	79172	1.29398e-11	304	336	238	71	112	93
277	ENSG00000119403	378.805	-1.35545	0.183153	-7.40063	1.35539e-13	7.83681e-12	PHF19	26147	1.29542e-11	580	613	441	205	240	194
278	ENSG00000134574	596.911	1.14414	0.154684	7.39659	1.39726e-13	8.04982e-12	DDB2	1643	1.33063e-11	342	399	375	846	722	897
279	ENSG00000213625	554.453	1.07183	0.145027	7.39056	1.46217e-13	8.39358e-12	LEPROT	54741	1.38746e-11	363	364	345	783	696	776
280	ENSG00000131747	1543.49	-1.61369	0.21914	-7.36373	1.78848e-13	1.01825e-11	TOP2A	7153	1.68317e-11	2526	2543	1910	678	1081	522
281	ENSG00000178038	109.946	2.19383	0.297935	7.36346	1.792e-13	1.01825e-11	ALS2CL	259173	1.68317e-11	41	39	38	179	113	249
282	ENSG00000168476	503.562	-1.16784	0.158601	-7.3634	1.79288e-13	1.01825e-11	REEP4	80346	1.68317e-11	656	771	664	296	347	287
283	ENSG00000072274	1190.17	-1.24703	0.169989	-7.33593	2.20187e-13	1.24612e-11	TFRC	7037	2.05983e-11	1829	1919	1276	649	734	734
284	ENSG00000145632	908.557	1.46145	0.199626	7.32096	2.46207e-13	1.38847e-11	PLK2	10769	2.29514e-11	387	584	481	1548	971	1480
285	ENSG00000179750	62.8895	-2.3887	0.326491	-7.31628	2.54933e-13	1.43264e-11	APOBEC3B	9582	2.36815e-11	101	103	113	25	23	12
286	ENSG00000167703	311.739	1.40849	0.192801	7.30542	2.76409e-13	1.54789e-11	SLC43A2	124935	2.55866e-11	194	166	152	551	392	416
287	ENSG00000109805	191.744	-2.01505	0.275984	-7.30131	2.84973e-13	1.59029e-11	NCAPG	64151	2.62874e-11	347	317	258	59	121	49
288	ENSG00000006634	174.277	-1.60071	0.219292	-7.29946	2.88935e-13	1.60679e-11	DBF4	10926	2.65602e-11	278	262	247	75	112	73
289	ENSG00000108861	957.434	1.02089	0.139867	7.29899	2.89937e-13	1.60679e-11	DUSP3	1845	2.65602e-11	634	667	595	1415	1202	1231
290	ENSG00000166340	906.486	1.12745	0.15467	7.28941	3.11308e-13	1.71822e-11	TPP1	1200	2.84022e-11	634	495	578	1235	1386	1110
291	ENSG00000109881	217.027	-1.43009	0.196203	-7.28883	3.12667e-13	1.71822e-11	CCDC34	91057	2.84022e-11	327	276	347	100	128	124
292	ENSG00000103275	995.016	-0.967752	0.132777	-7.28857	3.13262e-13	1.71822e-11	UBE2I	7329	2.84022e-11	1239	1379	1332	656	706	657
293	ENSG00000167670	273.598	-1.83145	0.251851	-7.27199	3.54238e-13	1.93634e-11	CHAF1A	10036	3.20076e-11	474	523	285	112	159	89
294	ENSG00000115129	772.663	1.05468	0.145139	7.26674	3.68278e-13	2.00624e-11	TP53I3	9540	3.31631e-11	485	496	525	1150	931	1048
295	ENSG00000106462	167.977	-1.59332	0.219464	-7.26003	3.86991e-13	2.10103e-11	EZH2	2146	3.473e-11	248	279	229	64	92	95
296	ENSG00000160221	633.321	1.041	0.143589	7.24986	4.17204e-13	2.25741e-11	C21orf33	102724023	3.7315e-11	435	404	404	836	800	921
297	ENSG00000125657	109.7	1.82599	0.252027	7.24521	4.31755e-13	2.32828e-11	TNFSF9	8744	3.84864e-11	42	59	44	194	144	175
298	ENSG00000123416	3338.14	-1.49166	0.206155	-7.23563	4.63357e-13	2.49031e-11	TUBA1B	10376	4.11648e-11	5583	5896	3295	1834	2039	1381
299	ENSG00000079462	450.289	-1.09173	0.151066	-7.22688	4.94227e-13	2.64734e-11	PAFAH1B3	5050	4.37604e-11	627	627	584	288	305	270
300	ENSG00000162063	219.832	-1.8159	0.251414	-7.22274	5.09521e-13	2.72016e-11	CCNF	899	4.49642e-11	387	419	221	93	119	80
301	ENSG00000163131	142.015	1.67881	0.232686	7.21491	5.39686e-13	2.87163e-11	CTSS	1520	4.7468e-11	57	62	84	189	247	213
302	ENSG00000143815	491.852	-1.27703	0.177281	-7.2034	5.87297e-13	3.11462e-11	LBR	3930	5.14846e-11	716	771	603	280	342	240
303	ENSG00000164087	128.823	-1.88405	0.261615	-7.20161	5.95038e-13	3.14526e-11	POC1A	25886	5.1991e-11	219	221	169	45	77	43
304	ENSG00000168496	710.445	-1.48478	0.206192	-7.20093	5.98052e-13	3.15079e-11	FEN1	2237	5.20824e-11	1118	1272	751	370	451	301
305	ENSG00000166619	479.697	1.16069	0.161298	7.19595	6.20272e-13	3.25714e-11	BLCAP	10904	5.38404e-11	319	270	301	695	577	716
306	ENSG00000188486	586.798	-1.63244	0.226896	-7.19467	6.26131e-13	3.27716e-11	H2AFX	3014	5.41714e-11	863	1189	610	239	357	263
307	ENSG00000074410	5216.66	1.02299	0.142315	7.18824	6.56326e-13	3.42401e-11	CA12	771	5.65988e-11	3391	3420	3512	5784	7878	7315
308	ENSG00000156976	913.139	1.66417	0.231835	7.17826	7.06049e-13	3.67146e-11	EIF4A2	100302143	6.06891e-11	381	360	574	984	1256	1924
309	ENSG00000175868	40.9694	-2.91557	0.406406	-7.17402	7.28255e-13	3.77467e-11	CALCB	797	6.23952e-11	72	69	76	7	11	11
310	ENSG00000177606	299.815	1.53385	0.214013	7.16707	7.66214e-13	3.95861e-11	JUN	3725	6.54357e-11	172	117	173	349	451	537
311	ENSG00000233725	85.901	2.06346	0.288065	7.16318	7.8825e-13	4.05936e-11	LINC00284	121838	6.71011e-11	43	25	31	125	123	168
312	ENSG00000164050	514.625	1.34995	0.188843	7.14855	8.76989e-13	4.50188e-11	PLXNB1	5364	7.44159e-11	356	271	243	657	674	887
313	ENSG00000175215	504.008	-1.09562	0.153476	-7.13871	9.42101e-13	4.80662e-11	CTDSP2	10106	7.94533e-11	684	678	697	322	358	284
314	ENSG00000125885	340.071	-1.22316	0.171342	-7.13867	9.42357e-13	4.80662e-11	MCM8	84515	7.94533e-11	506	507	415	187	220	205
315	ENSG00000094914	805.823	-1.05981	0.148555	-7.1341	9.74213e-13	4.95333e-11	AAAS	8086	8.18784e-11	1158	1138	971	470	566	532
316	ENSG00000261578	257.457	1.56627	0.220319	7.10908	1.16816e-12	5.92064e-11	RP11-21L23.2	NA	9.78681e-11	145	94	151	304	443	408
317	ENSG00000143321	4388.25	-1.0096	0.142145	-7.1026	1.22432e-12	6.1857e-11	HDGF	3068	1.02249e-10	6026	6118	5447	3009	3275	2454
318	ENSG00000198055	408.911	-1.22637	0.172789	-7.09748	1.27048e-12	6.39874e-11	GRK6	2870	1.05771e-10	589	638	491	252	269	214
319	ENSG00000153885	712.19	-1.08418	0.15312	-7.08056	1.4357e-12	7.20818e-11	KCTD15	79047	1.19151e-10	899	1049	956	500	476	393
320	ENSG00000149809	440.433	1.23289	0.174156	7.07926	1.44922e-12	7.25333e-11	TM7SF2	7108	1.19897e-10	273	239	277	741	565	548
321	ENSG00000175938	79.6592	2.13388	0.30152	7.07706	1.47244e-12	7.34662e-11	ORAI3	93129	1.2144e-10	32	20	37	123	109	157
322	ENSG00000164124	145.394	1.56869	0.221785	7.07305	1.51565e-12	7.53871e-11	TMEM144	55314	1.24615e-10	62	72	86	231	191	231
323	ENSG00000165916	1625.63	-0.874495	0.12372	-7.06833	1.56808e-12	7.77533e-11	PSMC3	5702	1.28526e-10	2111	2113	2087	1144	1207	1091
324	ENSG00000153048	355.815	-1.23437	0.174793	-7.06187	1.64281e-12	8.12076e-11	CARHSP1	23589	1.34236e-10	531	541	426	191	233	213
325	ENSG00000172037	894.33	1.36487	0.193446	7.05559	1.71866e-12	8.46956e-11	LAMB2	3913	1.40002e-10	581	372	548	1114	1170	1581
326	ENSG00000171320	127.618	-1.94735	0.27624	-7.0495	1.79559e-12	8.82154e-11	ESCO2	157570	1.4582e-10	227	220	161	42	77	39
327	ENSG00000059804	266.792	1.34765	0.191575	7.03457	1.99877e-12	9.7897e-11	SLC2A3	6515	1.61824e-10	157	166	129	335	368	447
328	ENSG00000102109	220.262	1.29287	0.184079	7.02345	2.16455e-12	1.05693e-10	PCSK1N	27344	1.74711e-10	113	134	136	299	328	310
329	ENSG00000148180	788.8	1.22358	0.174489	7.0124	2.34262e-12	1.13896e-10	GSN	2934	1.88269e-10	468	403	548	1249	893	1171
330	ENSG00000198056	66.7639	-2.22268	0.316984	-7.01196	2.35001e-12	1.13896e-10	PRIM1	5557	1.88269e-10	97	119	114	31	24	15
331	ENSG00000123473	133.156	-1.71657	0.244815	-7.01173	2.35386e-12	1.13896e-10	STIL	6491	1.88269e-10	210	222	181	48	83	56
332	ENSG00000130227	791.341	-1.03618	0.147804	-7.0105	2.3747e-12	1.14558e-10	XPO7	23039	1.89364e-10	1091	1043	1057	501	595	460
333	ENSG00000084234	2473.83	0.950738	0.13564	7.00928	2.39556e-12	1.15217e-10	APLP2	334	1.90453e-10	1758	1618	1685	2950	3132	3700
334	ENSG00000075702	192.022	-1.81549	0.259132	-7.00602	2.45187e-12	1.17572e-10	WDR62	284403	1.94347e-10	301	402	194	74	100	82
335	ENSG00000251095	37.2469	3.57733	0.510743	7.00418	2.48438e-12	1.18776e-10	RP11-115D19.1	NA	1.96336e-10	7	4	6	100	39	67
336	ENSG00000138449	229.593	1.4908	0.213216	6.99198	2.7103e-12	1.29191e-10	SLC40A1	30061	2.13552e-10	145	92	124	281	354	381
337	ENSG00000137404	125.989	-1.61465	0.230943	-6.99153	2.71897e-12	1.2922e-10	NRM	11270	2.136e-10	183	208	179	54	74	58
338	ENSG00000080986	72.7558	-2.21487	0.317412	-6.97788	2.99659e-12	1.41992e-10	NDC80	10403	2.34713e-10	119	113	127	17	39	22
339	ENSG00000198830	1770.17	-1.224	0.175448	-6.97639	3.02861e-12	1.43086e-10	HMGN2	3151	2.36521e-10	2422	2795	2220	849	1342	993
340	ENSG00000185347	117.643	-1.67814	0.240618	-6.97427	3.07457e-12	1.4483e-10	C14orf80	283643	2.39404e-10	176	209	153	55	51	63
341	ENSG00000156802	483.023	-1.54531	0.22169	-6.9706	3.15598e-12	1.48146e-10	ATAD2	29028	2.44884e-10	820	775	563	186	340	214
342	ENSG00000166816	117.758	1.77332	0.254412	6.97026	3.16345e-12	1.48146e-10	LDHD	197257	2.44884e-10	65	47	47	143	192	212
343	ENSG00000196208	53.906	2.68752	0.385626	6.96924	3.18667e-12	1.48798e-10	GREB1	9687	2.45962e-10	12	16	15	126	57	96
344	ENSG00000114573	481.692	1.16036	0.166688	6.96127	3.3722e-12	1.57003e-10	ATP6V1A	523	2.59526e-10	304	345	244	690	640	667
345	ENSG00000069275	2753.8	-1.0216	0.146922	-6.95332	3.5678e-12	1.65629e-10	NUCKS1	64710	2.73784e-10	3640	3619	3812	1824	2119	1509
346	ENSG00000163703	215.551	1.47411	0.212129	6.94911	3.67596e-12	1.70156e-10	CRELD1	78987	2.81268e-10	133	100	109	269	294	388
347	ENSG00000221829	238.19	-1.46612	0.211059	-6.94645	3.74583e-12	1.72891e-10	FANCG	2189	2.85789e-10	369	385	295	96	155	129
348	ENSG00000105011	205.39	-1.961	0.282552	-6.94032	3.91215e-12	1.80049e-10	ASF1B	55723	2.9762e-10	331	416	233	66	128	58
349	ENSG00000205403	128.577	2.24313	0.323252	6.93927	3.94142e-12	1.80876e-10	CFI	3426	2.98988e-10	45	30	60	114	247	276
350	ENSG00000166275	95.9917	1.80605	0.260329	6.93754	3.98997e-12	1.82581e-10	BORCS7	119032	3.01806e-10	33	46	49	134	147	166
351	ENSG00000183778	59.824	2.33598	0.336769	6.93644	4.02096e-12	1.83475e-10	B3GALT5	10317	3.03284e-10	12	24	24	82	109	109
352	ENSG00000099956	638.057	-1.03952	0.150016	-6.92942	4.2257e-12	1.92269e-10	SMARCB1	6598	3.17821e-10	784	922	870	460	408	385
353	ENSG00000127946	334.28	-1.32364	0.191158	-6.92435	4.37997e-12	1.98724e-10	HIP1	3092	3.2849e-10	435	559	440	232	166	174
354	ENSG00000171219	127.856	1.53474	0.222108	6.90989	4.85024e-12	2.19439e-10	CDC42BPG	55561	3.62732e-10	72	65	60	195	174	202
355	ENSG00000137337	296.794	-1.37907	0.199693	-6.90594	4.98717e-12	2.24999e-10	MDC1	9656	3.71922e-10	473	451	362	153	205	136
356	ENSG00000197582	356.216	1.21001	0.175332	6.90125	5.15456e-12	2.31897e-10	GPX1P1	NA	3.83326e-10	207	227	211	540	410	542
357	ENSG00000104738	953.883	-1.34752	0.19531	-6.89938	5.22296e-12	2.34316e-10	MCM4	4173	3.87324e-10	1529	1580	998	459	652	504
358	ENSG00000214391	846.106	-1.46629	0.212863	-6.88843	5.64123e-12	2.52374e-10	TUBAP2	NA	4.17174e-10	1464	1416	847	452	543	355
359	ENSG00000106105	3424.03	-1.36748	0.198574	-6.88649	5.71843e-12	2.55115e-10	GARS	2617	4.21705e-10	3887	4175	6744	2196	1930	1612
360	ENSG00000171992	2142.36	1.25595	0.182428	6.88462	5.794e-12	2.57769e-10	SYNPO	11346	4.26091e-10	1381	1283	1129	3969	2434	2657
361	ENSG00000147592	365.911	1.24439	0.180802	6.88262	5.87601e-12	2.60693e-10	LACTB2	51110	4.30925e-10	195	208	249	466	470	607
362	ENSG00000163808	79.3344	-2.21108	0.322143	-6.86367	6.71131e-12	2.96929e-10	KIF15	56992	4.90823e-10	153	124	114	20	44	20
363	ENSG00000104897	536.073	-1.0903	0.158947	-6.85949	6.91079e-12	3.04913e-10	SF3A2	8175	5.0402e-10	634	767	789	358	359	310
364	ENSG00000141696	495.719	1.15186	0.168289	6.84454	7.67236e-12	3.37584e-10	P3H4	10609	5.58025e-10	336	267	320	587	703	761
365	ENSG00000235142	130.966	1.83608	0.2683	6.84339	7.73399e-12	3.39363e-10	RP1-60O19.1	100422737	5.60966e-10	57	48	67	137	222	254
366	ENSG00000165480	125.962	-2.11697	0.309746	-6.83451	8.22833e-12	3.60068e-10	SKA3	221150	5.95192e-10	218	206	190	35	80	27
367	ENSG00000166289	64.19	2.19168	0.320738	6.83326	8.30038e-12	3.62231e-10	PLEKHF1	79156	5.98768e-10	24	26	19	106	82	128
368	ENSG00000157214	220.15	1.32859	0.194506	6.83059	8.45686e-12	3.68057e-10	STEAP2	261729	6.08398e-10	114	126	136	274	308	363
369	ENSG00000099783	1887.26	-0.998787	0.146399	-6.82237	8.95534e-12	3.88696e-10	HNRNPM	4670	6.42513e-10	2599	2558	2390	1283	1440	1053
370	ENSG00000196305	2279.03	-0.969467	0.142406	-6.80775	9.91344e-12	4.29118e-10	IARS	3376	7.09331e-10	3052	3108	2892	1803	1452	1367
371	ENSG00000182372	154.892	1.51241	0.222188	6.80687	9.97464e-12	4.30603e-10	CLN8	100500912	7.11786e-10	86	81	74	218	193	278
372	ENSG00000164125	38.2524	2.89342	0.42593	6.79318	1.09687e-11	4.72243e-10	FAM198B	51313	7.80617e-10	6	7	14	72	71	59
373	ENSG00000078804	423.706	1.27788	0.188225	6.78912	1.12819e-11	4.84427e-10	TP53INP2	58476	8.00757e-10	248	190	304	650	612	537
374	ENSG00000090581	207.154	1.48607	0.218987	6.7861	1.15207e-11	4.92152e-10	GNPTG	84572	8.13527e-10	88	115	124	272	265	379
375	ENSG00000111445	236.405	-1.34363	0.197999	-6.78607	1.15233e-11	4.92152e-10	RFC5	5985	8.13527e-10	333	387	297	119	159	123
376	ENSG00000150782	1089.25	0.955415	0.140855	6.78297	1.17729e-11	5.01475e-10	IL18	3606	8.28937e-10	760	710	754	1621	1312	1378
377	ENSG00000105722	705.523	-1.00192	0.147806	-6.77864	1.21314e-11	5.15377e-10	ERF	2077	8.51917e-10	840	1045	939	470	489	450
378	ENSG00000071626	789.395	-1.00829	0.148776	-6.77724	1.22492e-11	5.19004e-10	DAZAP1	26528	8.57913e-10	1058	1174	932	501	563	508
379	ENSG00000165943	166.549	1.37411	0.203067	6.76677	1.31685e-11	5.56484e-10	MOAP1	64112	9.19866e-10	95	94	89	239	214	268
380	ENSG00000144455	210.039	1.33964	0.198369	6.75329	1.44529e-11	6.0915e-10	SUMF1	285362	1.00692e-09	114	124	119	275	269	360
381	ENSG00000170312	472.8	-1.33546	0.197767	-6.75271	1.45109e-11	6.09991e-10	CDK1	983	1.00831e-09	725	679	627	211	360	235
382	ENSG00000159259	199.821	-1.60071	0.237283	-6.74602	1.51959e-11	6.37114e-10	CHAF1B	8208	1.05315e-09	320	358	223	88	127	83
383	ENSG00000071539	344.396	-1.37187	0.203427	-6.74379	1.54311e-11	6.45285e-10	TRIP13	9319	1.06665e-09	542	579	369	191	219	166
384	ENSG00000050405	222.072	1.27163	0.188725	6.73801	1.60575e-11	6.69731e-10	LIMA1	51474	1.10706e-09	145	108	137	312	311	319
385	ENSG00000114346	788.059	-1.14166	0.169449	-6.7375	1.61135e-11	6.70321e-10	ECT2	1894	1.10804e-09	1197	1153	903	465	578	431
386	ENSG00000130816	643.197	-1.18786	0.176415	-6.73332	1.65829e-11	6.88064e-10	DNMT1	1786	1.13737e-09	902	1061	719	372	446	360
387	ENSG00000086289	947.296	0.990132	0.147116	6.73026	1.69361e-11	7.00903e-10	EPDR1	54749	1.15859e-09	675	658	570	1342	1111	1328
388	ENSG00000172890	993.963	1.11065	0.165187	6.72358	1.77309e-11	7.319e-10	NADSYN1	55191	1.20983e-09	625	597	666	1639	1100	1336
389	ENSG00000186185	148.876	-1.8724	0.278992	-6.71131	1.92882e-11	7.94138e-10	KIF18B	146909	1.31271e-09	216	314	172	42	78	72
390	ENSG00000151640	165.774	1.71807	0.256058	6.70967	1.9507e-11	8.01086e-10	DPYSL4	10570	1.32419e-09	84	90	58	343	212	208
391	ENSG00000196419	5207.81	-0.881964	0.131492	-6.70734	1.98205e-11	8.11881e-10	XRCC6	2547	1.34204e-09	6717	6718	6821	4181	3474	3335
392	ENSG00000169926	1170.9	-0.912097	0.135993	-6.70693	1.98763e-11	8.12087e-10	KLF13	51621	1.34238e-09	1678	1499	1410	800	854	785
393	ENSG00000141522	1869.51	-1.31738	0.196434	-6.7065	1.99351e-11	8.1242e-10	ARHGDIA	396	1.34293e-09	2873	2993	2139	1353	1088	772
394	ENSG00000153044	95.6498	-2.00602	0.299171	-6.70526	2.01042e-11	8.17233e-10	CENPH	64946	1.35088e-09	150	172	138	33	58	24
395	ENSG00000137216	517.727	1.03724	0.154699	6.70488	2.01572e-11	8.17312e-10	TMEM63B	55362	1.35101e-09	340	333	344	651	645	792
396	ENSG00000101846	258.851	1.5357	0.229177	6.70092	2.07109e-11	8.3764e-10	STS	412	1.38462e-09	161	131	106	509	327	319
397	ENSG00000009954	1412.37	-0.914948	0.136689	-6.69366	2.1766e-11	8.78098e-10	BAZ1B	9031	1.45149e-09	1875	1875	1788	1027	1054	856
398	ENSG00000104852	2243.07	-0.830518	0.124218	-6.68595	2.29434e-11	9.23271e-10	SNRNP70	6625	1.52617e-09	2857	3075	2682	1587	1646	1611
399	ENSG00000072778	1733.68	0.956869	0.143149	6.68443	2.3182e-11	9.30533e-10	ACADVL	37	1.53817e-09	1212	1198	1127	2226	2001	2639
400	ENSG00000151503	216.266	-1.38348	0.207378	-6.67131	2.53527e-11	1.01512e-09	NCAPD3	23310	1.678e-09	334	349	255	112	142	106
401	ENSG00000128335	444.486	1.1059	0.165883	6.66679	2.61467e-11	1.0443e-09	APOL2	23780	1.72623e-09	291	252	303	690	542	588
402	ENSG00000197448	1932.45	1.00942	0.151459	6.66461	2.6536e-11	1.05722e-09	GSTK1	373156	1.74758e-09	1378	1131	1339	2175	2686	2886
403	ENSG00000065911	984.897	-1.37896	0.206942	-6.66353	2.67336e-11	1.06244e-09	MTHFD2	10797	1.75622e-09	1014	1352	1903	641	501	499
404	ENSG00000066117	823.857	-0.902678	0.135551	-6.65933	2.75074e-11	1.09049e-09	SMARCD1	6602	1.80258e-09	1072	1059	1090	557	620	546
405	ENSG00000269378	2704.46	0.875524	0.131813	6.64216	3.09115e-11	1.22242e-09	ITGB1P1	NA	2.02065e-09	1924	1975	1825	3502	3134	3866
406	ENSG00000123933	284.992	1.18048	0.177759	6.64089	3.11785e-11	1.22994e-09	MXD4	100616358	2.03308e-09	181	170	173	457	357	373
407	ENSG00000158406	81.898	1.99728	0.300802	6.63986	3.13975e-11	1.23553e-09	HIST1H4H	8365	2.04233e-09	24	25	49	130	121	141
408	ENSG00000213300	358.368	-1.05718	0.159528	-6.62694	3.42715e-11	1.34533e-09	HNRNPA3P6	NA	2.22382e-09	454	489	509	231	247	220
409	ENSG00000072571	245.981	-1.62625	0.245687	-6.6192	3.61157e-11	1.41425e-09	HMMR	3161	2.33776e-09	366	357	392	101	180	80
410	ENSG00000214145	80.346	1.9712	0.298075	6.6131	3.7636e-11	1.47019e-09	LINC00887	NA	2.43022e-09	39	23	36	102	127	155
411	ENSG00000256167	173.542	-1.5382	0.232873	-6.60533	3.96627e-11	1.54559e-09	ATF4P4	NA	2.55486e-09	217	218	340	90	84	93
412	ENSG00000151136	300.175	1.34455	0.203605	6.60372	4.00957e-11	1.55867e-09	BTBD11	121551	2.57648e-09	169	192	148	534	340	418
413	ENSG00000162520	73.8579	1.86925	0.28311	6.60256	4.04126e-11	1.56719e-09	SYNC	81493	2.59056e-09	33	32	30	119	97	131
414	ENSG00000179163	202.081	1.28436	0.194628	6.59905	4.13813e-11	1.60088e-09	FUCA1	2517	2.64625e-09	112	103	138	274	305	281
415	ENSG00000139278	278.319	1.34912	0.204629	6.59302	4.30975e-11	1.66325e-09	GLIPR1	11010	2.74935e-09	157	191	122	471	357	371
416	ENSG00000119333	689.406	-1.02377	0.155563	-6.58108	4.67031e-11	1.79807e-09	WDR34	89891	2.9722e-09	981	1019	773	447	449	468
417	ENSG00000180155	66.7495	1.98814	0.302165	6.57966	4.71518e-11	1.81099e-09	LYNX1	66004	2.99356e-09	31	23	27	119	88	113
418	ENSG00000141027	1144.87	-0.966082	0.146983	-6.57274	4.93972e-11	1.89269e-09	NCOR1	9611	3.12861e-09	1474	1555	1515	843	836	647
419	ENSG00000169689	584.249	-1.13313	0.172602	-6.56499	5.20376e-11	1.9891e-09	STRA13	201254	3.28798e-09	770	917	721	297	388	413
420	ENSG00000141030	939.541	-0.937465	0.142968	-6.55719	5.48327e-11	2.09095e-09	COPS3	8533	3.45634e-09	1154	1248	1302	633	718	583
421	ENSG00000005469	76.5887	1.88914	0.288404	6.55031	5.74173e-11	2.18431e-09	CROT	54677	3.61066e-09	28	37	33	97	122	142
422	ENSG00000124795	629.822	-1.1999	0.183238	-6.54828	5.8205e-11	2.20869e-09	DEK	7913	3.65096e-09	955	916	762	352	483	312
423	ENSG00000071967	278.144	1.11734	0.170648	6.54761	5.8467e-11	2.20869e-09	CYBRD1	79901	3.65096e-09	185	160	182	404	370	369
424	ENSG00000197780	160.482	1.34095	0.204801	6.54759	5.84718e-11	2.20869e-09	TAF13	6884	3.65096e-09	101	92	79	227	245	219
425	ENSG00000150687	7106.33	0.895849	0.136887	6.54446	5.9712e-11	2.25023e-09	PRSS23	11098	3.71962e-09	4978	4774	5153	10754	8430	8549
426	ENSG00000151655	264.311	1.57418	0.240633	6.5418	6.07811e-11	2.28514e-09	ITIH2	3698	3.77733e-09	120	112	168	276	518	393
427	ENSG00000183696	153.221	-1.36119	0.208304	-6.5346	6.37801e-11	2.39228e-09	UPP1	7378	3.95443e-09	204	234	223	89	93	76
428	ENSG00000175216	1474.25	-0.880965	0.13484	-6.53343	6.42805e-11	2.40541e-09	CKAP5	9793	3.97614e-09	1974	1950	1809	1047	1133	932
429	ENSG00000125835	2244.84	-0.989247	0.151516	-6.52898	6.62201e-11	2.47222e-09	SNRPB	6628	4.08657e-09	2775	3430	2752	1305	1506	1701
430	ENSG00000140284	1093.57	1.01253	0.155138	6.52664	6.72618e-11	2.50527e-09	SLC27A2	11001	4.1412e-09	835	675	663	1603	1515	1270
431	ENSG00000118007	213.875	-1.23413	0.189112	-6.52594	6.75752e-11	2.5111e-09	STAG1	10274	4.15084e-09	322	289	289	128	143	112
432	ENSG00000159335	3634.19	-0.955334	0.146429	-6.52421	6.83614e-11	2.53151e-09	PTMS	5763	4.18457e-09	4671	4656	5059	2408	2914	2098
433	ENSG00000109846	65.9495	3.04727	0.467084	6.52404	6.84405e-11	2.53151e-09	CRYAB	1410	4.18457e-09	13	8	22	40	143	170
434	ENSG00000169562	67.7156	2.68035	0.410917	6.52286	6.89798e-11	2.54558e-09	GJB1	2705	4.20784e-09	21	13	21	52	177	123
435	ENSG00000167468	1242.78	-0.862756	0.132501	-6.51134	7.44853e-11	2.73911e-09	GPX4	2879	4.52775e-09	1478	1664	1670	834	925	886
436	ENSG00000092201	1806.08	-0.918401	0.14105	-6.51117	7.45663e-11	2.73911e-09	SUPT16H	11198	4.52775e-09	2523	2530	2033	1301	1288	1161
437	ENSG00000001617	246.642	1.64455	0.252856	6.50387	7.828e-11	2.86895e-09	SEMA3F	6405	4.74238e-09	137	113	109	222	444	456
438	ENSG00000186871	121.11	-2.11532	0.325274	-6.50318	7.86412e-11	2.86908e-09	ERCC6L	54821	4.74258e-09	214	240	136	36	74	27
439	ENSG00000126453	207.505	-1.34489	0.206805	-6.50318	7.86417e-11	2.86908e-09	BCL2L12	83596	4.74258e-09	292	359	243	121	122	109
440	ENSG00000067167	2934.24	1.19185	0.183598	6.49166	8.48983e-11	3.0903e-09	TRAM1	23471	5.10826e-09	2042	1809	1509	5235	3807	3204
441	ENSG00000139734	131.708	-2.06542	0.318222	-6.49051	8.55446e-11	3.10676e-09	DIAPH3	81624	5.13547e-09	243	230	165	52	78	23
442	ENSG00000073417	586.773	-0.927024	0.142848	-6.4896	8.60663e-11	3.11864e-09	PDE8A	5151	5.1551e-09	779	778	750	388	436	389
443	ENSG00000114779	634.157	0.90785	0.140019	6.48376	8.94649e-11	3.23447e-09	ABHD14B	84836	5.34657e-09	447	451	425	793	876	814
444	ENSG00000198355	299.036	-1.12595	0.173824	-6.47753	9.32332e-11	3.36311e-09	PIM3	415116	5.55922e-09	402	434	395	210	162	192
445	ENSG00000214078	1195.43	-0.91386	0.141184	-6.47282	9.61933e-11	3.46209e-09	CPNE1	8904	5.72283e-09	1384	1570	1733	872	828	786
446	ENSG00000024526	144.56	-1.70198	0.262992	-6.4716	9.69692e-11	3.48219e-09	DEPDC1	55635	5.75606e-09	251	231	181	59	97	48
447	ENSG00000165304	372.716	-1.61373	0.249394	-6.47058	9.76289e-11	3.49804e-09	MELK	9833	5.78225e-09	615	572	499	138	285	128
448	ENSG00000187994	80.5655	2.14405	0.331482	6.46807	9.92641e-11	3.54869e-09	RINL	126432	5.86598e-09	28	19	43	149	89	156
449	ENSG00000101439	2840.03	0.8481	0.131176	6.46537	1.01052e-10	3.60457e-09	CST3	1471	5.95834e-09	1932	1914	2240	3557	3465	3933
450	ENSG00000116299	34.0462	3.05479	0.47251	6.46501	1.01291e-10	3.60505e-09	KIAA1324	57535	5.95915e-09	10	9	3	77	44	61
451	ENSG00000162645	154.902	1.40536	0.217579	6.4591	1.05329e-10	3.74047e-09	GBP2	2634	6.18298e-09	87	68	100	239	232	204
452	ENSG00000158104	163.104	1.71166	0.265201	6.45422	1.08777e-10	3.85438e-09	HPD	3242	6.37128e-09	104	54	71	189	244	318
453	ENSG00000145476	92.1068	2.1428	0.332124	6.45179	1.10537e-10	3.90808e-09	CYP4V2	285440	6.46005e-09	46	30	26	86	179	186
454	ENSG00000205581	1491.12	-0.843265	0.130749	-6.4495	1.12222e-10	3.95891e-09	HMGN1	3150	6.54407e-09	1859	1955	1931	985	1166	1051
455	ENSG00000158125	87.1353	1.69343	0.262683	6.44668	1.14325e-10	4.02423e-09	XDH	7498	6.65205e-09	51	36	36	137	129	133
456	ENSG00000185561	188.428	1.3142	0.203883	6.44584	1.14962e-10	4.03778e-09	TLCD2	727910	6.67444e-09	107	96	121	312	248	246
457	ENSG00000168679	971.404	1.32428	0.205468	6.44519	1.15453e-10	4.04617e-09	SLC16A4	9122	6.6883e-09	621	433	609	970	1528	1667
458	ENSG00000120129	2501.88	1.06581	0.16542	6.44303	1.17108e-10	4.09521e-09	DUSP1	1843	6.76937e-09	1835	1523	1495	2668	3524	3968
459	ENSG00000233276	2515.59	1.05557	0.163844	6.44254	1.17487e-10	4.09949e-09	GPX1	2876	6.77645e-09	1519	1908	1477	3630	2738	3822
460	ENSG00000128944	222.003	-1.21577	0.188749	-6.44123	1.1851e-10	4.12622e-09	KNSTRN	90417	6.82064e-09	298	325	307	121	157	123
461	ENSG00000115875	1038.94	-1.04722	0.162675	-6.43748	1.21475e-10	4.22027e-09	SRSF7	6432	6.9761e-09	1290	1315	1596	555	764	714
462	ENSG00000163781	277.479	-1.32676	0.206181	-6.43494	1.23524e-10	4.28218e-09	TOPBP1	11073	7.07844e-09	444	458	288	161	160	154
463	ENSG00000102854	133.925	1.45684	0.227273	6.4101	1.4542e-10	5.02975e-09	MSLN	10232	8.31416e-09	72	76	66	213	160	216
464	ENSG00000186193	125.969	-2.10534	0.328457	-6.40979	1.45717e-10	5.02975e-09	SAPCD2	89958	8.31416e-09	236	253	124	32	75	36
465	ENSG00000168056	902.354	0.961101	0.149989	6.40779	1.47643e-10	5.07715e-09	LTBP3	4054	8.39252e-09	670	616	551	1345	1091	1142
466	ENSG00000158604	710.403	0.92169	0.143841	6.40771	1.47724e-10	5.07715e-09	TMED4	222068	8.39252e-09	460	532	480	950	858	982
467	ENSG00000072864	220.999	-1.2177	0.190123	-6.4048	1.50566e-10	5.16374e-09	NDE1	619553	8.53565e-09	303	325	299	125	157	117
468	ENSG00000112081	1730.76	-0.860733	0.134488	-6.40007	1.5531e-10	5.29747e-09	SRSF3	6428	8.75671e-09	2268	2304	2124	1137	1379	1172
469	ENSG00000224078	341.462	1.11493	0.174207	6.4	1.55375e-10	5.29747e-09	SNHG14	NA	8.75671e-09	210	242	195	514	408	480
470	ENSG00000203760	111.463	-1.82071	0.284489	-6.39992	1.55458e-10	5.29747e-09	CENPW	387103	8.75671e-09	153	202	166	38	74	36
471	ENSG00000117834	50.2141	2.51004	0.392422	6.39628	1.59206e-10	5.41368e-09	SLC5A9	200010	8.94881e-09	20	12	13	53	91	113
472	ENSG00000187741	120.308	-1.65865	0.259433	-6.39338	1.62253e-10	5.50561e-09	FANCA	2175	9.10076e-09	193	222	134	50	68	56
473	ENSG00000184990	416.928	-1.20117	0.188088	-6.38624	1.70015e-10	5.7568e-09	SIVA1	10572	9.51598e-09	553	671	519	195	283	281
474	ENSG00000029534	54.0276	2.49615	0.391218	6.38045	1.76566e-10	5.96599e-09	ANK1	286	9.86177e-09	20	16	13	139	61	75
475	ENSG00000164754	938.208	-0.975355	0.152887	-6.3796	1.77547e-10	5.98652e-09	RAD21	100500914	9.8957e-09	1273	1218	1240	557	754	587
476	ENSG00000182481	2938.78	-1.17112	0.183963	-6.36607	1.93938e-10	6.52546e-09	KPNA2	3838	1.07866e-08	4461	4744	3004	1881	2061	1481
477	ENSG00000121621	167.866	-1.46683	0.230433	-6.36552	1.94624e-10	6.53481e-09	KIF18A	81930	1.0802e-08	266	267	207	75	117	77
478	ENSG00000213551	191.71	-1.30576	0.205302	-6.3602	2.01495e-10	6.75133e-09	DNAJC9	23234	1.11599e-08	274	317	228	102	108	121
479	ENSG00000140297	2424.2	0.996837	0.156961	6.35087	2.14094e-10	7.15853e-09	GCNT3	9245	1.1833e-08	1671	1581	1603	3915	2630	3145
480	ENSG00000166123	576.025	-1.21508	0.191637	-6.34056	2.28929e-10	7.63859e-09	GPT2	84706	1.26266e-08	643	736	1036	380	354	306
481	ENSG00000279806	350.713	1.17985	0.186305	6.33288	2.40628e-10	8.01227e-09	RP11-58O9.2	NA	1.32443e-08	242	229	173	555	425	481
482	ENSG00000125753	1569.94	-0.909894	0.143687	-6.33247	2.41268e-10	8.0169e-09	VASP	7408	1.32519e-08	1901	2109	2138	1200	1141	930
483	ENSG00000198796	198.821	1.2168	0.192253	6.32914	2.46531e-10	8.17482e-09	ALPK2	115701	1.3513e-08	116	120	123	273	248	314
484	ENSG00000070814	954.347	-1.1412	0.180657	-6.3169	2.66858e-10	8.83057e-09	TCOF1	6949	1.45969e-08	1286	1518	1136	617	712	458
485	ENSG00000139343	741.373	-0.982448	0.155561	-6.31552	2.69258e-10	8.89161e-09	SNRPF	6636	1.46978e-08	867	1035	1051	443	561	491
486	ENSG00000121691	869.596	1.00502	0.159179	6.31379	2.7228e-10	8.97293e-09	CAT	847	1.48322e-08	633	574	529	1003	1118	1362
487	ENSG00000047249	321.232	1.02229	0.162002	6.31036	2.78385e-10	9.15527e-09	ATP6V1H	51606	1.51336e-08	211	218	208	454	400	438
488	ENSG00000065609	44.2723	2.37033	0.375941	6.30504	2.8812e-10	9.45601e-09	SNAP91	9892	1.56308e-08	19	13	11	62	72	89
489	ENSG00000124067	592.09	1.22394	0.194176	6.30322	2.91533e-10	9.54845e-09	SLC12A4	6560	1.57836e-08	413	369	283	1006	652	830
490	ENSG00000104774	351.057	1.16236	0.184477	6.30088	2.95956e-10	9.67353e-09	MAN2B1	4125	1.59903e-08	189	228	233	583	424	449
491	ENSG00000129636	494.155	0.987242	0.156855	6.29398	3.09434e-10	1.00935e-08	ITFG1	81533	1.66845e-08	352	298	344	709	670	591
492	ENSG00000100296	448.369	-1.14655	0.182463	-6.28376	3.30476e-10	1.07579e-08	THOC5	8563	1.77828e-08	579	643	631	354	250	233
493	ENSG00000101945	232.531	-1.50696	0.239831	-6.28341	3.3123e-10	1.07606e-08	SUV39H1	6839	1.77872e-08	385	412	234	103	151	109
494	ENSG00000102287	88.8874	2.38355	0.379385	6.28266	3.32822e-10	1.0778e-08	GABRE	574412	1.7816e-08	27	34	25	86	104	258
495	ENSG00000205277	33.2368	2.93519	0.467213	6.28234	3.33508e-10	1.0778e-08	MUC12	10071	1.7816e-08	10	5	8	42	77	57
496	ENSG00000159348	259.472	1.10812	0.17639	6.28221	3.33784e-10	1.0778e-08	CYB5R1	51706	1.7816e-08	164	165	165	350	319	395
497	ENSG00000185189	167.838	1.37785	0.219564	6.27537	3.48807e-10	1.12404e-08	NRBP2	102466748	1.85804e-08	84	84	112	286	211	230
498	ENSG00000170482	325.884	1.61313	0.257097	6.27441	3.50965e-10	1.12872e-08	SLC23A1	9963	1.86578e-08	214	113	154	315	596	563
499	ENSG00000126457	2423.3	-0.864686	0.137854	-6.27245	3.55402e-10	1.14037e-08	PRMT1	3276	1.88503e-08	3113	3517	2756	1674	1652	1828
500	ENSG00000167196	697.534	1.00991	0.161013	6.27219	3.56011e-10	1.14037e-08	FBXO22	26263	1.88503e-08	451	446	491	1100	793	903
501	ENSG00000277586	579.324	0.965153	0.153898	6.27137	3.5789e-10	1.1441e-08	NEFL	4747	1.8912e-08	422	352	403	685	808	805
502	ENSG00000138668	1805.13	-1.05738	0.168634	-6.27024	3.60492e-10	1.15013e-08	HNRNPD	3184	1.90116e-08	2387	2505	2424	1099	1486	930
503	ENSG00000251257	22.8479	4.7714	0.761184	6.2684	3.64777e-10	1.16148e-08	CTD-2263F21.1	NA	1.91993e-08	1	1	3	42	37	53
504	ENSG00000142507	1606.19	-0.757494	0.12086	-6.26756	3.66754e-10	1.16427e-08	PSMB6	5694	1.92454e-08	1992	2019	2045	1179	1204	1199
505	ENSG00000166710	1597.21	0.861442	0.137448	6.26741	3.67107e-10	1.16427e-08	B2M	567	1.92454e-08	1118	1041	1243	1887	2065	2229
506	ENSG00000143162	1040.87	0.936392	0.149421	6.2668	3.68538e-10	1.1665e-08	CREG1	8804	1.92823e-08	749	625	769	1278	1538	1286
507	ENSG00000108559	692.237	-0.889324	0.141963	-6.26449	3.74036e-10	1.18157e-08	NUP88	4927	1.95313e-08	926	881	889	462	535	459
508	ENSG00000076706	129.107	1.92371	0.307539	6.25519	3.97035e-10	1.2503e-08	MCAM	102465453	2.06675e-08	78	40	43	125	237	251
509	ENSG00000102974	653.083	-0.997872	0.15953	-6.25506	3.97355e-10	1.2503e-08	CTCF	10664	2.06675e-08	940	875	796	470	473	364
510	ENSG00000184428	285.681	-1.07827	0.172434	-6.25325	4.01985e-10	1.26239e-08	TOP1MT	116447	2.08673e-08	356	375	433	187	186	177
511	ENSG00000132780	665.083	-1.07156	0.171438	-6.25045	4.09279e-10	1.28278e-08	NASP	4678	2.12043e-08	843	1004	857	340	500	447
512	ENSG00000136156	1493.98	1.04826	0.167974	6.24057	4.35976e-10	1.36379e-08	ITM2B	9445	2.25434e-08	1002	824	1096	1615	2273	2154
513	ENSG00000169359	126.323	1.51846	0.243436	6.23762	4.44279e-10	1.38705e-08	SLC33A1	9197	2.29279e-08	73	55	68	150	185	226
514	ENSG00000112118	943.145	-1.15501	0.185458	-6.22786	4.72856e-10	1.4734e-08	MCM3	4172	2.43552e-08	1328	1554	1023	481	695	578
515	ENSG00000122566	9115.07	-0.943574	0.151597	-6.22423	4.83923e-10	1.50495e-08	HNRNPA2B1	3181	2.48768e-08	12134	11153	12694	5396	7591	5722
516	ENSG00000182165	57.6134	2.01721	0.324202	6.22207	4.90639e-10	1.52288e-08	TP53TG1	NA	2.51732e-08	21	28	20	79	89	110
517	ENSG00000132256	155.243	1.32869	0.213613	6.2201	4.96832e-10	1.53912e-08	TRIM5	85363	2.54416e-08	104	86	75	231	200	236
518	ENSG00000157379	159.146	1.3294	0.213814	6.21756	5.04942e-10	1.56123e-08	DHRS1	115817	2.5807e-08	81	90	101	233	193	257
519	ENSG00000101076	540.137	-1.00938	0.16247	-6.21274	5.20685e-10	1.6068e-08	HNF4A	3172	2.65604e-08	684	778	702	353	416	306
520	ENSG00000084463	835.999	-0.910526	0.146678	-6.20765	5.37832e-10	1.6537e-08	WBP11	51729	2.73356e-08	1081	1132	1061	595	646	501
521	ENSG00000128590	240.661	1.41145	0.227377	6.20752	5.38258e-10	1.6537e-08	DNAJB9	4189	2.73356e-08	117	94	184	339	335	375
522	ENSG00000154839	136.025	-2.09794	0.337979	-6.20731	5.3898e-10	1.6537e-08	SKA1	220134	2.73356e-08	182	251	228	29	94	32
523	ENSG00000025423	24.9521	3.70104	0.59663	6.20323	5.53142e-10	1.69391e-08	HSD17B6	8630	2.80002e-08	1	7	3	36	50	53
524	ENSG00000184661	247.346	-1.66555	0.2686	-6.20085	5.61573e-10	1.71644e-08	CDCA2	157313	2.83727e-08	417	383	328	110	180	66
525	ENSG00000182379	91.4157	-1.66717	0.269171	-6.19371	5.87625e-10	1.79265e-08	NXPH4	11247	2.96324e-08	152	147	118	46	53	33
526	ENSG00000171552	2179.89	0.783613	0.126782	6.18077	6.37907e-10	1.94234e-08	BCL2L1	598	3.21069e-08	1630	1697	1479	2808	2610	2856
527	ENSG00000064687	237.402	1.23662	0.200098	6.1801	6.40593e-10	1.94682e-08	ABCA7	10347	3.21809e-08	142	127	155	361	264	375
528	ENSG00000173894	98.2802	-1.63634	0.265177	-6.17075	6.7966e-10	2.06164e-08	CBX2	84733	3.40788e-08	153	180	113	49	50	45
529	ENSG00000149212	354.314	1.16865	0.189446	6.1688	6.88116e-10	2.08334e-08	SESN3	143686	3.44376e-08	263	189	202	544	519	409
530	ENSG00000125107	1768.68	-1.12327	0.182196	-6.16521	7.03907e-10	2.12713e-08	CNOT1	23019	3.51614e-08	2673	2363	2237	1438	1059	841
531	ENSG00000117984	3219.44	0.886287	0.143815	6.16267	7.15279e-10	2.15742e-08	CTSD	1509	3.56621e-08	2538	2028	2215	3688	4640	4207
532	ENSG00000135486	6145.16	-0.755269	0.122624	-6.15921	7.31072e-10	2.20091e-08	HNRNPA1	3178	3.6381e-08	7423	8046	7685	4691	4844	4183
533	ENSG00000119681	135.298	1.41157	0.229197	6.15878	7.33097e-10	2.20287e-08	LTBP2	4053	3.64134e-08	62	80	80	199	166	224
534	ENSG00000147536	116.903	-1.6033	0.260354	-6.15816	7.3594e-10	2.20727e-08	GINS4	84296	3.64861e-08	181	214	133	52	71	51
535	ENSG00000127415	84.3232	1.86825	0.303496	6.15577	7.47143e-10	2.23668e-08	IDUA	3425	3.69723e-08	42	22	45	111	123	163
536	ENSG00000108055	547.4	-1.05285	0.171371	-6.14369	8.06243e-10	2.4091e-08	SMC3	9126	3.98224e-08	702	775	738	343	434	291
537	ENSG00000105699	995.162	-0.852278	0.138759	-6.14213	8.14236e-10	2.42845e-08	LSR	51599	4.01423e-08	1328	1184	1331	751	733	645
538	ENSG00000177106	1185.71	1.02374	0.166764	6.13883	8.31305e-10	2.47476e-08	EPS8L2	64787	4.09077e-08	788	868	690	1853	1275	1641
539	ENSG00000224259	60.3282	2.06627	0.336609	6.13848	8.33145e-10	2.47563e-08	LINC01133	100505633	4.09221e-08	21	18	32	124	80	87
540	ENSG00000100982	401.001	-0.930477	0.151684	-6.1343	8.55337e-10	2.53687e-08	PCIF1	63935	4.19343e-08	541	512	525	272	288	268
541	ENSG00000100121	195.059	1.29806	0.212052	6.12143	9.27408e-10	2.74554e-08	GGTLC2	91227	4.53837e-08	101	98	140	236	301	295
542	ENSG00000116852	78.7151	-1.82777	0.298792	-6.11718	9.52482e-10	2.81457e-08	KIF21B	23046	4.65247e-08	115	96	157	28	35	41
543	ENSG00000162105	324.307	0.991409	0.162143	6.1144	9.69196e-10	2.85868e-08	SHANK2	22941	4.72539e-08	216	225	210	424	408	463
544	ENSG00000164109	169.573	-1.40696	0.230123	-6.11398	9.71789e-10	2.86106e-08	MAD2L1	4085	4.72933e-08	257	288	193	83	114	82
545	ENSG00000142230	1776.04	-0.877772	0.143613	-6.11208	9.83439e-10	2.89005e-08	SAE1	10055	4.77724e-08	2351	2436	2113	1247	1418	1090
546	ENSG00000127561	308.006	1.07118	0.175517	6.10301	1.04091e-09	3.05334e-08	SYNGR3	9143	5.04717e-08	198	212	186	455	356	442
547	ENSG00000136114	115.931	1.80118	0.295268	6.10015	1.05969e-09	3.10274e-08	THSD1	55901	5.12882e-08	47	65	43	260	127	154
548	ENSG00000167553	5365.68	-1.03612	0.16988	-6.09916	1.06628e-09	3.11633e-08	TUBA1C	84790	5.15129e-08	7793	8442	5405	3543	3856	3154
549	ENSG00000020633	110.104	-1.54193	0.253248	-6.08861	1.13892e-09	3.31977e-08	RUNX3	864	5.48758e-08	161	173	158	39	69	61
550	ENSG00000179630	65.4889	1.91008	0.313722	6.08846	1.14003e-09	3.31977e-08	LACC1	144811	5.48758e-08	29	32	22	131	89	90
551	ENSG00000120437	679.951	-0.943952	0.155085	-6.08668	1.15279e-09	3.35083e-08	ACAT2	39	5.53892e-08	1006	901	777	465	500	430
552	ENSG00000167123	184.153	1.25452	0.206326	6.08027	1.19981e-09	3.48118e-08	CERCAM	51148	5.75438e-08	128	110	88	251	243	286
553	ENSG00000196072	504.382	0.928407	0.152835	6.07456	1.24332e-09	3.6009e-08	BLOC1S2	282991	5.95228e-08	310	376	357	700	638	646
554	ENSG00000162813	343.688	1.04807	0.172559	6.07369	1.25007e-09	3.61391e-08	BPNT1	10380	5.97379e-08	216	233	223	480	391	519
555	ENSG00000118855	302.161	1.16042	0.191077	6.07306	1.25496e-09	3.62152e-08	MFSD1	64747	5.98636e-08	228	165	168	474	407	372
556	ENSG00000116062	667.777	-1.18512	0.195189	-6.07166	1.26598e-09	3.64675e-08	MSH6	2956	6.02807e-08	940	1129	713	376	498	350
557	ENSG00000122912	132.435	1.52198	0.250684	6.07133	1.26854e-09	3.64757e-08	SLC25A16	8034	6.02943e-08	67	73	66	187	146	256
558	ENSG00000035499	116.228	-1.47356	0.242903	-6.06643	1.30783e-09	3.75379e-08	DEPDC1B	55789	6.20501e-08	166	207	140	59	62	64
559	ENSG00000120539	154.8	-1.27051	0.209486	-6.06486	1.32068e-09	3.78389e-08	MASTL	84930	6.25476e-08	217	241	198	81	100	92
560	ENSG00000101447	335.076	-1.42776	0.235558	-6.0612	1.35112e-09	3.8642e-08	FAM83D	81610	6.38751e-08	521	604	340	181	230	134
561	ENSG00000163655	1086.8	-0.933661	0.154172	-6.05598	1.39562e-09	3.98435e-08	GMPS	8833	6.58612e-08	1513	1442	1324	796	833	613
562	ENSG00000145022	448.335	0.992517	0.163914	6.05512	1.4031e-09	3.99859e-08	TCTA	6988	6.60966e-08	325	251	324	579	575	636
563	ENSG00000111206	905.524	-2.66196	0.439797	-6.05269	1.42446e-09	4.04563e-08	FOXM1	2305	6.68742e-08	1752	1864	1076	237	364	140
564	ENSG00000174442	300.367	-1.31707	0.217601	-6.05267	1.42466e-09	4.04563e-08	ZWILCH	55055	6.68742e-08	457	482	347	169	221	126
565	ENSG00000232187	178.36	-1.27922	0.211365	-6.05219	1.42892e-09	4.05053e-08	FTH1P7	NA	6.69552e-08	253	283	222	122	104	86
566	ENSG00000140350	1982	-0.913926	0.151153	-6.04637	1.48149e-09	4.19215e-08	ANP32A	8125	6.92961e-08	2539	2601	2629	1414	1595	1114
567	ENSG00000170144	2183.41	-0.85531	0.141609	-6.03996	1.54152e-09	4.35433e-08	HNRNPA3	100616394	7.19769e-08	2714	2774	2949	1465	1810	1388
568	ENSG00000144580	486.965	-0.965513	0.160046	-6.03272	1.61219e-09	4.54592e-08	CNOT9	9125	7.51439e-08	666	685	581	292	368	330
569	ENSG00000100629	55.0773	-1.92741	0.319683	-6.02911	1.64863e-09	4.6405e-08	CEP128	145508	7.67074e-08	88	95	78	21	26	22
570	ENSG00000072042	1483.85	0.760358	0.126268	6.02178	1.72507e-09	4.84715e-08	RDH11	51109	8.01233e-08	1100	1071	1134	1749	1916	1934
571	ENSG00000177602	64.2549	-2.22761	0.370643	-6.01012	1.8539e-09	5.20002e-08	GSG2	83903	8.59562e-08	113	134	70	24	33	11
572	ENSG00000179950	2211.51	-0.737761	0.122765	-6.00952	1.86076e-09	5.21013e-08	PUF60	22827	8.61233e-08	2718	2952	2625	1680	1631	1663
573	ENSG00000215182	30381.8	1.06824	0.177831	6.00705	1.88925e-09	5.28067e-08	MUC5AC	4586	8.72894e-08	24380	14986	19496	47299	41045	35084
574	ENSG00000112742	149.055	-1.69825	0.283013	-6.00063	1.96559e-09	5.48448e-08	TTK	7272	9.06584e-08	238	235	210	55	112	44
575	ENSG00000159403	152.183	1.70372	0.283942	6.00024	1.97025e-09	5.48792e-08	C1R	715	9.07152e-08	75	74	66	128	275	295
576	ENSG00000146374	664.35	0.863847	0.144006	5.9987	1.98907e-09	5.53072e-08	RSPO3	84870	9.14227e-08	485	499	429	812	908	854
577	ENSG00000213463	370.742	0.920615	0.153507	5.99723	2.00713e-09	5.57126e-08	SYNJ2BP	55333	9.20928e-08	260	247	262	484	496	475
578	ENSG00000258150	96.5432	1.63348	0.272391	5.99682	2.0122e-09	5.57567e-08	RP11-345J4.3	NA	9.21657e-08	60	48	33	139	128	171
579	ENSG00000141429	1387.51	0.939486	0.156677	5.99631	2.01852e-09	5.58353e-08	GALNT1	2589	9.22957e-08	1062	932	859	2142	1751	1579
580	ENSG00000094916	1772.24	-0.953771	0.159085	-5.99536	2.03032e-09	5.60647e-08	CBX5	100616400	9.26749e-08	2397	2291	2325	1266	1413	942
581	ENSG00000258130	100.074	1.61231	0.26915	5.99036	2.09376e-09	5.77172e-08	RP11-347C12.3	NA	9.54064e-08	61	53	34	143	132	177
582	ENSG00000196756	522.522	-0.939754	0.156947	-5.98773	2.12796e-09	5.85592e-08	SNHG17	NA	9.67982e-08	595	767	699	347	361	366
583	ENSG00000087088	1264.7	0.85279	0.142445	5.98679	2.14019e-09	5.87945e-08	BAX	581	9.71872e-08	775	999	931	1655	1555	1673
584	ENSG00000130159	394.192	-0.926777	0.154826	-5.98592	2.15167e-09	5.90089e-08	ECSIT	51295	9.75416e-08	509	530	510	283	283	249
585	ENSG00000107833	455.014	-0.933023	0.155888	-5.9852	2.16123e-09	5.91698e-08	NPM3	10360	9.78075e-08	556	657	579	289	326	323
586	ENSG00000011260	561.939	-0.860429	0.143817	-5.98279	2.19351e-09	5.9951e-08	UTP18	51096	9.90989e-08	696	702	776	392	412	393
587	ENSG00000196975	6052.15	0.925204	0.154822	5.97593	2.28784e-09	6.24226e-08	ANXA4	307	1.03184e-07	4307	3677	4542	6443	8325	9019
588	ENSG00000130826	1059.19	-0.762443	0.127664	-5.97228	2.33965e-09	6.37275e-08	DKC1	100847052	1.05341e-07	1288	1381	1328	786	794	777
589	ENSG00000142731	76.7327	-1.90488	0.319079	-5.96994	2.37339e-09	6.4537e-08	PLK4	10733	1.0668e-07	127	129	107	21	51	26
590	ENSG00000160201	732.261	-0.859862	0.144161	-5.9646	2.45228e-09	6.6569e-08	U2AF1	102724594	1.10038e-07	907	942	983	477	580	503
591	ENSG00000106459	118.875	-1.38849	0.232847	-5.9631	2.47493e-09	6.70703e-08	NRF1	4899	1.10867e-07	160	199	157	64	73	60
592	ENSG00000114270	292.864	1.75246	0.293954	5.96169	2.49637e-09	6.75368e-08	COL7A1	100313843	1.11638e-07	120	194	88	378	301	676
593	ENSG00000110455	95.3001	1.47674	0.247984	5.95498	2.60108e-09	7.02512e-08	ACCS	84680	1.16125e-07	54	45	52	127	137	157
594	ENSG00000275895	734.946	-0.854897	0.143635	-5.95187	2.65092e-09	7.14768e-08	U2AF1L5	NA	1.18151e-07	908	945	986	478	580	511
595	ENSG00000161533	610.696	1.06485	0.179095	5.94573	2.75223e-09	7.40837e-08	ACOX1	51	1.2246e-07	473	339	372	707	973	799
596	ENSG00000100479	83.4298	-1.80513	0.303715	-5.9435	2.79006e-09	7.49758e-08	POLE2	5427	1.23935e-07	133	149	107	25	54	33
597	ENSG00000163923	152.341	-1.29389	0.217824	-5.94007	2.84898e-09	7.6431e-08	RPL39L	116832	1.2634e-07	239	219	191	89	103	74
598	ENSG00000137804	49.157	-2.04641	0.344721	-5.93644	2.91278e-09	7.80119e-08	NUSAP1	51203	1.28953e-07	79	92	66	18	22	17
599	ENSG00000136861	414.924	-0.969057	0.163263	-5.93557	2.92829e-09	7.82962e-08	CDK5RAP2	55755	1.29423e-07	579	565	504	300	299	243
600	ENSG00000182749	182.799	1.31868	0.222545	5.92546	3.11419e-09	8.31146e-08	PAQR7	164091	1.37388e-07	122	104	87	314	209	260
601	ENSG00000100033	259.731	1.50209	0.253507	5.92522	3.11887e-09	8.31146e-08	PRODH	102724788	1.37388e-07	190	104	112	507	300	345
602	ENSG00000105327	108.28	1.66696	0.281514	5.92141	3.19188e-09	8.49188e-08	BBC3	100422832	1.40371e-07	44	37	75	158	139	197
603	ENSG00000042088	163.518	-1.22425	0.207045	-5.91296	3.36012e-09	8.92466e-08	TDP1	55775	1.47524e-07	255	235	196	102	100	92
604	ENSG00000168453	344.276	-1.30355	0.220496	-5.91189	3.38206e-09	8.96805e-08	HR	55806	1.48242e-07	510	444	515	133	270	193
605	ENSG00000065923	274.934	1.07718	0.182281	5.90944	3.43275e-09	9.08744e-08	SLC9A7	84679	1.50215e-07	207	168	155	405	366	348
606	ENSG00000031003	52.5258	2.16425	0.36638	5.90711	3.4816e-09	9.20155e-08	FAM13B	51306	1.52101e-07	21	26	10	68	84	107
607	ENSG00000142453	490.745	-1.11967	0.189584	-5.90592	3.50676e-09	9.25277e-08	CARM1	10498	1.52948e-07	694	758	564	378	306	244
608	ENSG00000215375	38.6668	2.72046	0.460921	5.90222	3.58638e-09	9.44729e-08	MYL5	4636	1.56163e-07	15	5	10	42	64	96
609	ENSG00000065268	484.523	-0.872744	0.14796	-5.8985	3.66826e-09	9.64711e-08	WDR18	57418	1.59467e-07	618	667	595	357	333	337
610	ENSG00000161692	90.3647	-1.65498	0.280605	-5.8979	3.68146e-09	9.66596e-08	DBF4B	80174	1.59778e-07	128	170	114	37	56	38
611	ENSG00000226306	234.475	1.33626	0.2269	5.88923	3.88005e-09	1.01707e-07	NPY6R	4888	1.68121e-07	162	89	148	287	386	335
612	ENSG00000148498	1153.33	-0.941615	0.159988	-5.88554	3.96763e-09	1.03833e-07	PARD3	56288	1.71635e-07	1388	1625	1537	941	774	654
613	ENSG00000112697	574.138	0.916498	0.155754	5.88428	3.99801e-09	1.04457e-07	TMEM30A	55754	1.72667e-07	461	358	373	777	757	718
614	ENSG00000010803	120.421	-1.34017	0.227862	-5.88152	4.06512e-09	1.06038e-07	SCMH1	22955	1.7528e-07	168	180	170	60	80	65
615	ENSG00000101161	1206.33	-0.816753	0.138963	-5.87747	4.16579e-09	1.08487e-07	PRPF6	24148	1.79328e-07	1613	1452	1552	927	925	770
616	ENSG00000111331	1238.03	-1.14099	0.194292	-5.87253	4.29184e-09	1.11588e-07	OAS3	4940	1.84455e-07	1956	1899	1255	825	891	603
617	ENSG00000160447	87.9567	-1.69609	0.289439	-5.85992	4.63084e-09	1.20207e-07	PKN3	29941	1.98701e-07	136	167	101	32	51	42
618	ENSG00000143228	104.967	-1.74574	0.298044	-5.85733	4.7038e-09	1.21903e-07	NUF2	83540	2.01506e-07	170	156	159	32	77	36
619	ENSG00000136628	2584.05	-0.885467	0.151237	-5.85484	4.77482e-09	1.23544e-07	EPRS	2058	2.04217e-07	3142	3079	3838	1999	1907	1539
620	ENSG00000264112	74.5235	2.24171	0.383012	5.85284	4.83259e-09	1.24837e-07	RP11-159D12.2	NA	2.06355e-07	15	33	30	65	121	183
621	ENSG00000131669	411.308	1.00725	0.172135	5.85152	4.87098e-09	1.25626e-07	NINJ1	4814	2.07659e-07	244	322	255	597	490	561
622	ENSG00000158195	742.363	-0.939488	0.160621	-5.84911	4.94219e-09	1.27258e-07	WASF2	10163	2.10356e-07	1005	985	938	598	513	416
623	ENSG00000083123	133.104	1.42352	0.243546	5.84497	5.06653e-09	1.3025e-07	BCKDHB	594	2.15302e-07	78	55	84	156	200	225
624	ENSG00000165490	84.0072	-1.67129	0.286035	-5.84296	5.12825e-09	1.31625e-07	DDIAS	220042	2.17576e-07	125	139	119	36	56	29
625	ENSG00000168743	287.542	1.24512	0.213173	5.84088	5.19269e-09	1.33066e-07	NPNT	255743	2.19957e-07	211	159	141	312	473	428
626	ENSG00000197771	574.144	-0.899934	0.154119	-5.8392	5.2453e-09	1.34199e-07	MCMBP	79892	2.21831e-07	737	817	689	371	448	383
627	ENSG00000126216	203.62	-1.10131	0.188737	-5.83517	5.37351e-09	1.3726e-07	TUBGCP3	10426	2.26891e-07	294	276	263	124	119	146
628	ENSG00000051523	1712.85	0.795053	0.13628	5.83398	5.41201e-09	1.38023e-07	CYBA	1535	2.28152e-07	1153	1272	1334	2185	1965	2369
629	ENSG00000134222	86.1139	-1.77815	0.304818	-5.83349	5.42809e-09	1.38213e-07	PSRC1	84722	2.28466e-07	137	145	117	22	56	39
630	ENSG00000108187	193.938	1.61821	0.277452	5.83241	5.46328e-09	1.38889e-07	PBLD	64081	2.29583e-07	101	63	122	183	344	350
631	ENSG00000165092	99544.3	0.836039	0.143539	5.82446	5.72993e-09	1.45437e-07	ALDH1A1	216	2.40406e-07	72356	62142	79949	110746	134907	137165
632	ENSG00000140534	165.634	-1.68975	0.290217	-5.82238	5.80159e-09	1.47023e-07	TICRR	90381	2.43028e-07	272	321	166	62	115	58
633	ENSG00000169418	171.221	1.5464	0.265774	5.81846	5.93921e-09	1.50272e-07	NPR1	4881	2.484e-07	124	74	64	203	237	326
634	ENSG00000127804	496.209	-0.91213	0.156805	-5.81697	5.99235e-09	1.51378e-07	METTL16	79066	2.50227e-07	624	665	656	394	333	306
635	ENSG00000108312	920.138	-0.80783	0.138881	-5.81669	6.00228e-09	1.5139e-07	UBTF	7343	2.50247e-07	1168	1264	1082	629	711	668
636	ENSG00000166788	297.361	-1.01476	0.174684	-5.80913	6.27995e-09	1.58144e-07	SAAL1	113174	2.61412e-07	423	399	371	184	227	180
637	ENSG00000169375	567.68	-0.850534	0.146501	-5.80565	6.4118e-09	1.61211e-07	SIN3A	25942	2.66481e-07	755	744	692	439	401	375
638	ENSG00000167904	139.934	1.23632	0.213039	5.80326	6.50375e-09	1.63267e-07	TMEM68	137695	2.69879e-07	87	80	82	186	182	221
639	ENSG00000103495	234.21	-1.28619	0.221688	-5.80182	6.55993e-09	1.64419e-07	MAZ	4150	2.71785e-07	366	375	255	140	164	105
640	ENSG00000164649	176.534	-1.17563	0.202776	-5.79768	6.72373e-09	1.68261e-07	CDCA7L	55536	2.78135e-07	244	270	220	116	115	93
641	ENSG00000119383	1307.25	-0.842167	0.145318	-5.79534	6.81842e-09	1.70365e-07	PTPA	5524	2.81613e-07	1816	1737	1482	1008	970	831
642	ENSG00000100647	141.7	1.32438	0.228599	5.79345	6.89558e-09	1.72024e-07	SUSD6	9766	2.84356e-07	72	85	85	217	159	232
643	ENSG00000178921	724.379	-1.03888	0.179489	-5.78797	7.12417e-09	1.77451e-07	PFAS	5198	2.93326e-07	1037	1123	764	547	465	411
644	ENSG00000265808	469.794	0.8508	0.147066	5.78516	7.24455e-09	1.80169e-07	SEC22B	9554	2.97818e-07	329	342	334	634	572	608
645	ENSG00000023839	2779.76	0.883006	0.152796	5.779	7.51451e-09	1.86593e-07	ABCC2	1244	3.08438e-07	2187	1794	1883	4101	2993	3721
646	ENSG00000175643	111.076	-1.7381	0.301232	-5.76997	7.92856e-09	1.96569e-07	RMI2	116028	3.24929e-07	198	175	139	41	80	33
647	ENSG00000112029	74.7194	-1.69438	0.293722	-5.76867	7.98997e-09	1.97786e-07	FBXO5	26271	3.26939e-07	133	115	95	32	46	29
648	ENSG00000136881	122.496	1.34452	0.233143	5.76691	8.07362e-09	1.99548e-07	BAAT	570	3.29852e-07	55	74	79	156	184	186
649	ENSG00000143549	4663.66	-0.779357	0.135166	-5.76594	8.12021e-09	2.0039e-07	TPM3	7170	3.31245e-07	6139	6030	5511	3688	3650	2963
650	ENSG00000197343	365.64	1.00628	0.17461	5.76303	8.26192e-09	2.03574e-07	ZNF655	79027	3.36507e-07	247	261	221	454	437	574
651	ENSG00000075856	499.797	-0.864974	0.150134	-5.76136	8.34394e-09	2.05279e-07	SART3	9733	3.39325e-07	619	707	610	352	369	342
652	ENSG00000102900	622.199	-0.984674	0.170921	-5.76098	8.36279e-09	2.05427e-07	NUP93	9688	3.3957e-07	843	975	661	445	417	391
653	ENSG00000000460	64.1522	-1.99893	0.347288	-5.75582	8.62202e-09	2.11471e-07	C1orf112	55732	3.49561e-07	117	114	77	28	36	13
654	ENSG00000162783	429.335	0.914066	0.158949	5.7507	8.88742e-09	2.17571e-07	IER5	51278	3.59644e-07	292	322	280	512	552	619
655	ENSG00000120438	2544.76	-0.783794	0.1363	-5.7505	8.8979e-09	2.17571e-07	TCP1	6950	3.59644e-07	3458	3190	3010	2009	1962	1640
656	ENSG00000185950	805.824	-0.902744	0.157043	-5.7484	9.00929e-09	2.19958e-07	IRS2	8660	3.63591e-07	1098	1074	978	574	645	466
657	ENSG00000161888	117.02	-1.58973	0.276572	-5.74797	9.03229e-09	2.20184e-07	SPC24	147841	3.63964e-07	178	220	130	44	77	54
658	ENSG00000133056	260.094	1.07361	0.186895	5.74441	9.22396e-09	2.24515e-07	PIK3C2B	5287	3.71123e-07	166	181	155	325	317	416
659	ENSG00000132688	21.9562	-3.57262	0.621969	-5.74404	9.24416e-09	2.24665e-07	NES	10763	3.71371e-07	43	51	28	5	2	3
660	ENSG00000102977	141.45	-1.34423	0.234046	-5.74346	9.27616e-09	2.25101e-07	ACD	65057	3.72092e-07	188	251	170	89	83	69
661	ENSG00000123485	332.745	-1.54289	0.268778	-5.74039	9.44608e-09	2.28878e-07	HJURP	55355	3.78335e-07	534	545	407	114	273	123
662	ENSG00000088247	1384.7	-0.900794	0.157008	-5.73726	9.62212e-09	2.32791e-07	KHSRP	100500888	3.84804e-07	1748	2112	1551	1014	1037	847
663	ENSG00000130827	57.3284	2.036	0.355069	5.73408	9.80416e-09	2.36838e-07	PLXNA3	55558	3.91492e-07	24	19	25	62	86	129
664	ENSG00000173456	291.355	-1.28458	0.224061	-5.73318	9.85645e-09	2.37742e-07	RNF26	79102	3.92988e-07	485	467	288	181	193	135
665	ENSG00000171960	142.236	-1.36205	0.237756	-5.72879	1.01151e-08	2.43615e-07	PPIH	10465	4.02695e-07	182	203	229	57	96	86
666	ENSG00000177076	39.8165	2.34328	0.409231	5.72607	1.02786e-08	2.4716e-07	ACER2	340485	4.08556e-07	14	15	10	93	50	56
667	ENSG00000121957	115.527	-1.44346	0.252097	-5.72583	1.02932e-08	2.4716e-07	GPSM2	29899	4.08556e-07	189	156	161	49	83	55
668	ENSG00000070950	177.286	-1.2383	0.21637	-5.72307	1.04614e-08	2.50822e-07	RAD18	56852	4.14608e-07	256	286	205	117	112	87
669	ENSG00000268942	77.4401	-1.6351	0.285964	-5.71784	1.07885e-08	2.58279e-07	CKS1BP3	NA	4.26935e-07	114	135	102	32	49	33
670	ENSG00000143622	160.133	1.23671	0.216316	5.71713	1.08341e-08	2.58982e-07	RIT1	6016	4.28097e-07	95	96	95	178	240	256
671	ENSG00000234975	946.625	-0.931775	0.163034	-5.71524	1.09551e-08	2.61486e-07	FTH1P2	NA	4.32235e-07	1371	1096	1260	714	710	530
672	ENSG00000112759	171.611	-1.41983	0.248441	-5.71498	1.09717e-08	2.61492e-07	SLC29A1	2030	4.32245e-07	254	327	168	90	101	90
673	ENSG00000175467	853.343	-0.895959	0.156781	-5.71471	1.09889e-08	2.61512e-07	SART1	9092	4.32279e-07	1046	1056	1229	588	690	512
674	ENSG00000204264	87.0346	1.7926	0.313706	5.71428	1.10172e-08	2.61798e-07	PSMB8	5696	4.32751e-07	35	43	39	80	150	175
675	ENSG00000197774	34.9428	2.42107	0.424048	5.70942	1.13363e-08	2.68981e-07	EME2	197342	4.44625e-07	8	12	13	48	52	77
676	ENSG00000132517	23.0277	3.44976	0.604266	5.70901	1.13636e-08	2.69231e-07	SLC52A1	55065	4.45038e-07	4	4	4	25	39	63
677	ENSG00000160007	1282.1	-0.897229	0.157219	-5.70688	1.15063e-08	2.72208e-07	ARHGAP35	2909	4.49959e-07	1793	1763	1450	1034	888	765
678	ENSG00000058804	418.53	-1.09941	0.19295	-5.6979	1.21293e-08	2.86523e-07	NDC1	55706	4.73622e-07	635	592	484	274	322	204
679	ENSG00000123737	268.257	-0.992517	0.174317	-5.69376	1.24272e-08	2.93129e-07	EXOSC9	5393	4.84541e-07	359	365	348	164	203	171
680	ENSG00000176619	782.883	-1.12356	0.197393	-5.69198	1.25575e-08	2.95767e-07	LMNB2	102466806	4.88902e-07	1151	1337	731	497	503	478
681	ENSG00000187837	528.891	1.28482	0.225815	5.68969	1.27269e-08	2.99316e-07	HIST1H1C	3006	4.94769e-07	245	249	430	790	574	885
682	ENSG00000132341	6354.88	-0.689645	0.12132	-5.68452	1.31178e-08	3.08057e-07	RAN	5901	5.09217e-07	7574	8481	7481	4679	5073	4841
683	ENSG00000189241	373.206	0.903877	0.159056	5.68276	1.32542e-08	3.10804e-07	TSPYL1	7259	5.13758e-07	271	262	247	531	470	458
684	ENSG00000143153	4029.18	1.12161	0.197481	5.6796	1.35009e-08	3.16126e-07	ATP1B1	481	5.22556e-07	2549	2388	2674	3608	7032	5923
685	ENSG00000125450	339.666	-1.07727	0.189696	-5.67896	1.35513e-08	3.16843e-07	NUP85	79902	5.2374e-07	466	519	398	173	251	232
686	ENSG00000130204	2369.52	-0.77721	0.136896	-5.67737	1.36784e-08	3.19348e-07	TOMM40	10452	5.27882e-07	2994	3323	2662	1837	1789	1613
687	ENSG00000122861	356.148	1.31538	0.231776	5.67521	1.38518e-08	3.22927e-07	PLAU	5328	5.33798e-07	184	231	197	349	467	708
688	ENSG00000197905	236.95	-1.05894	0.18662	-5.67429	1.39269e-08	3.24205e-07	TEAD4	7004	5.35909e-07	333	348	280	167	157	137
689	ENSG00000218739	317.527	0.913747	0.161063	5.67324	1.40118e-08	3.25709e-07	CEBPZOS	100505876	5.38396e-07	218	214	229	434	416	395
690	ENSG00000103257	22449.5	-0.908665	0.160186	-5.67256	1.40677e-08	3.26533e-07	SLC7A5	8140	5.39758e-07	29706	32735	25442	18519	15596	12698
691	ENSG00000224294	26.51	6.36196	1.12182	5.6711	1.41885e-08	3.28685e-07	RP3-326I13.1	101927501	5.43315e-07	2	0	0	78	24	55
692	ENSG00000138346	72.9215	-1.72132	0.303533	-5.67094	1.42014e-08	3.28685e-07	DNA2	1763	5.43315e-07	128	121	86	27	44	31
693	ENSG00000167088	635.5	-0.939539	0.165752	-5.66835	1.44175e-08	3.33205e-07	SNRPD1	6632	5.50788e-07	781	801	924	378	521	408
694	ENSG00000172828	185.91	1.21165	0.213907	5.66438	1.47554e-08	3.40522e-07	CES3	23491	5.62882e-07	120	114	103	203	269	307
695	ENSG00000013588	6751.61	1.26376	0.223515	5.65403	1.56733e-08	3.61186e-07	GPRC5A	693199	5.97039e-07	3848	4156	3907	14447	6737	7415
696	ENSG00000171617	333.541	1.13238	0.20032	5.65285	1.57812e-08	3.63149e-07	ENC1	8507	6.00285e-07	216	244	167	398	416	561
697	ENSG00000173457	1807.81	-0.787578	0.139528	-5.6446	1.65569e-08	3.80399e-07	PPP1R14B	26472	6.28798e-07	2249	2561	2058	1306	1436	1237
698	ENSG00000163918	154.604	-1.4338	0.254025	-5.64432	1.65837e-08	3.80399e-07	RFC4	5984	6.28798e-07	236	251	189	54	111	86
699	ENSG00000136699	595.412	-0.951993	0.16867	-5.64413	1.66021e-08	3.80399e-07	SMPD4	55627	6.28798e-07	877	842	635	419	433	366
700	ENSG00000118193	149.799	-1.643	0.291361	-5.63905	1.70989e-08	3.91224e-07	KIF14	9928	6.46692e-07	252	253	176	52	115	51
701	ENSG00000095485	274.516	-1.0435	0.185275	-5.63217	1.77954e-08	4.06396e-07	CWF19L1	55280	6.71772e-07	368	425	317	160	190	189
702	ENSG00000143416	653.618	1.12636	0.199992	5.632	1.78128e-08	4.06396e-07	SELENBP1	8991	6.71772e-07	486	297	448	715	1017	958
703	ENSG00000170779	113.145	-1.6295	0.289367	-5.63127	1.7889e-08	4.07555e-07	CDCA4	55038	6.73687e-07	151	245	117	63	51	52
704	ENSG00000100749	137.839	-1.26719	0.225357	-5.62304	1.87626e-08	4.2685e-07	VRK1	7443	7.05582e-07	179	218	187	71	99	74
705	ENSG00000141867	695.497	-0.808749	0.143876	-5.62114	1.89698e-08	4.30951e-07	BRD4	23476	7.1236e-07	868	926	862	495	558	463
706	ENSG00000116670	299.429	-0.995554	0.177142	-5.6201	1.90845e-08	4.32942e-07	MAD2L2	10459	7.15652e-07	359	448	390	178	218	204
707	ENSG00000257556	58.1582	1.76411	0.314346	5.61201	1.99993e-08	4.53054e-07	RP11-44N21.1	NA	7.48898e-07	24	24	32	74	99	97
708	ENSG00000154319	238.149	-0.999562	0.178181	-5.60983	2.02531e-08	4.58155e-07	FAM167A	83648	7.57329e-07	315	318	320	156	177	143
709	ENSG00000106399	249.687	-1.06446	0.189797	-5.60839	2.04213e-08	4.61307e-07	RPA3	6119	7.6254e-07	333	321	360	131	190	164
710	ENSG00000175920	59.0153	1.75849	0.313568	5.60802	2.04659e-08	4.61664e-07	DOK7	285489	7.6313e-07	29	26	26	88	74	112
711	ENSG00000116209	715.184	0.873818	0.155825	5.60769	2.05047e-08	4.6189e-07	TMEM59	9528	7.63504e-07	531	421	563	878	917	981
712	ENSG00000225663	283.723	-1.071	0.191012	-5.60696	2.05914e-08	4.6319e-07	MCRIP1	348262	7.65652e-07	374	465	315	176	192	181
713	ENSG00000159423	215.302	1.03052	0.184108	5.59736	2.17638e-08	4.88876e-07	ALDH4A1	8659	8.08111e-07	153	144	127	277	310	281
714	ENSG00000182872	565.333	-0.803193	0.14352	-5.59636	2.18893e-08	4.90388e-07	RBM10	8241	8.1061e-07	681	713	763	424	416	396
715	ENSG00000074800	35673.4	-0.816066	0.145824	-5.59624	2.19046e-08	4.90388e-07	ENO1	2023	8.1061e-07	50139	45405	40962	29461	26178	21895
716	ENSG00000119888	137.065	-1.68802	0.301642	-5.5961	2.19229e-08	4.90388e-07	EPCAM	4072	8.1061e-07	213	185	229	102	59	33
717	ENSG00000064601	964.17	0.781204	0.139614	5.59544	2.20062e-08	4.91563e-07	CTSA	5476	8.12553e-07	715	687	726	1090	1232	1335
718	ENSG00000053372	844.05	-0.820803	0.146752	-5.59314	2.22995e-08	4.97421e-07	MRTO4	51154	8.22236e-07	1023	1232	978	620	624	587
719	ENSG00000060982	118.168	-1.59534	0.285353	-5.59076	2.26073e-08	5.03586e-07	BCAT1	586	8.32426e-07	129	179	224	75	64	38
720	ENSG00000173221	1200.29	1.24852	0.223507	5.58603	2.32316e-08	5.16775e-07	GLRX	2745	8.54227e-07	717	550	867	1077	1953	2038
721	ENSG00000225630	24664.3	1.30058	0.232837	5.58578	2.32651e-08	5.168e-07	MTND2P28	NA	8.5427e-07	14282	8819	19630	26475	43163	35618
722	ENSG00000143401	524.164	-1.10828	0.198501	-5.58323	2.36093e-08	5.23421e-07	ANP32E	81611	8.65213e-07	698	707	743	240	441	317
723	ENSG00000128165	63.6783	-2.35312	0.421473	-5.58309	2.36284e-08	5.23421e-07	ADM2	79924	8.65213e-07	59	71	190	24	18	20
724	ENSG00000080839	159.993	-1.2221	0.219062	-5.57879	2.42203e-08	5.35791e-07	RBL1	5933	8.85661e-07	214	253	205	84	119	86
725	ENSG00000120896	529.664	-0.91913	0.16478	-5.57791	2.43423e-08	5.37274e-07	SORBS3	10174	8.88113e-07	714	729	635	416	380	303
726	ENSG00000162174	304.539	1.19308	0.213897	5.57782	2.43545e-08	5.37274e-07	ASRGL1	80150	8.88113e-07	191	172	193	292	516	463
727	ENSG00000149636	182.047	-1.29764	0.232951	-5.57045	2.54082e-08	5.59748e-07	DSN1	79980	9.25263e-07	286	294	196	88	132	96
728	ENSG00000135373	250.448	1.11018	0.199312	5.57006	2.54653e-08	5.60237e-07	EHF	26298	9.2607e-07	186	129	159	291	386	350
729	ENSG00000068912	784.067	0.747899	0.134387	5.56526	2.61769e-08	5.75102e-07	ERLEC1	27248	9.50643e-07	603	549	604	991	969	989
730	ENSG00000237973	122715	1.27961	0.229953	5.56468	2.62635e-08	5.76214e-07	MTCO1P12	NA	9.52481e-07	68764	44840	101199	134766	204266	182453
731	ENSG00000066248	89.0175	-1.60684	0.288778	-5.56426	2.63267e-08	5.76811e-07	NGEF	25791	9.53467e-07	120	157	125	32	62	38
732	ENSG00000090615	552.661	0.961722	0.172853	5.56382	2.63932e-08	5.77478e-07	GOLGA3	2802	9.5457e-07	381	369	375	646	639	906
733	ENSG00000231007	28.5874	-2.58089	0.463974	-5.56257	2.65829e-08	5.80834e-07	CDC20P1	NA	9.60117e-07	51	53	43	11	8	5
734	ENSG00000030582	1513.81	0.761589	0.136955	5.56086	2.68447e-08	5.85755e-07	GRN	2896	9.68252e-07	1044	1082	1244	2067	1816	1829
735	ENSG00000094804	537.799	-1.14354	0.205711	-5.55896	2.7138e-08	5.9135e-07	CDC6	990	9.775e-07	750	906	566	299	424	283
736	ENSG00000070010	723.964	-0.826754	0.148834	-5.55485	2.77845e-08	6.04616e-07	UFD1L	7353	9.99429e-07	860	940	978	563	455	547
737	ENSG00000089280	2224.37	-0.947458	0.170621	-5.553	2.80803e-08	6.10223e-07	FUS	2521	1.0087e-06	2872	2977	2939	1135	1872	1551
738	ENSG00000186567	34.0175	2.89559	0.521508	5.55234	2.81865e-08	6.117e-07	CEACAM19	56971	1.01114e-06	7	8	9	30	44	106
739	ENSG00000149257	1073.51	0.898048	0.161801	5.55033	2.85126e-08	6.1794e-07	SERPINH1	871	1.02145e-06	750	855	644	1177	1471	1544
740	ENSG00000104537	982.544	1.23693	0.222961	5.54772	2.89418e-08	6.25626e-07	ANXA13	312	1.03416e-06	666	392	698	984	1591	1565
741	ENSG00000126215	106.481	-1.57651	0.284173	-5.5477	2.89454e-08	6.25626e-07	XRCC3	7517	1.03416e-06	146	214	118	40	59	61
742	ENSG00000012822	153.731	1.34881	0.243152	5.54718	2.90314e-08	6.26641e-07	CALCOCO1	57658	1.03584e-06	68	73	120	220	197	245
743	ENSG00000117475	224.168	1.01445	0.183149	5.53891	3.04357e-08	6.56067e-07	BLZF1	8548	1.08448e-06	152	134	159	281	291	327
744	ENSG00000168300	128.765	1.28158	0.231433	5.53758	3.0668e-08	6.60187e-07	PCMTD1	115294	1.09129e-06	74	61	90	162	184	201
745	ENSG00000106665	485.288	-0.983457	0.177722	-5.53369	3.13561e-08	6.74094e-07	CLIP2	7461	1.11428e-06	731	594	609	379	338	261
746	ENSG00000118762	221.717	1.16606	0.211232	5.52029	3.38432e-08	7.26586e-07	PKD2	5311	1.20105e-06	170	142	98	301	303	317
747	ENSG00000011304	3517.42	-0.830413	0.150452	-5.51945	3.40063e-08	7.29109e-07	PTBP1	100616459	1.20521e-06	4751	5017	3740	2617	2737	2243
748	ENSG00000133101	50.9544	-2.54539	0.461233	-5.51866	3.41589e-08	7.31402e-07	CCNA1	8900	1.20901e-06	74	62	125	30	8	6
749	ENSG00000091436	566.879	-0.923764	0.16756	-5.51304	3.52681e-08	7.54144e-07	AC013461.1	51776	1.2466e-06	783	699	744	371	473	330
750	ENSG00000204386	645.691	0.975771	0.177003	5.51275	3.53278e-08	7.54413e-07	NEU1	4758	1.24704e-06	410	421	475	685	830	1052
751	ENSG00000135913	46.9989	-1.93613	0.351473	-5.50862	3.61657e-08	7.71278e-07	USP37	57695	1.27492e-06	88	75	60	20	22	16
752	ENSG00000120725	447.732	0.876229	0.159109	5.5071	3.648e-08	7.76946e-07	SIL1	64374	1.28429e-06	322	289	336	647	536	555
753	ENSG00000134954	128.989	-1.66552	0.302463	-5.50652	3.66001e-08	7.7847e-07	ETS1	2113	1.28681e-06	179	208	202	99	53	33
754	ENSG00000103043	539.094	-0.903377	0.164167	-5.50278	3.73846e-08	7.94101e-07	VAC14	55697	1.31265e-06	730	675	702	415	409	303
755	ENSG00000117360	518.328	-1.11923	0.203452	-5.50121	3.77184e-08	8.0013e-07	PRPF3	9129	1.32261e-06	681	592	857	236	372	373
756	ENSG00000100242	180.985	-1.22677	0.223205	-5.49617	3.88126e-08	8.22251e-07	SUN2	25777	1.35918e-06	256	295	210	135	99	91
757	ENSG00000180573	250.179	1.23774	0.225259	5.49475	3.91264e-08	8.27805e-07	HIST1H2AC	8334	1.36836e-06	122	117	209	345	322	386
758	ENSG00000204174	89.2089	1.65041	0.300558	5.49114	3.9934e-08	8.43776e-07	NPY4R	5540	1.39476e-06	46	54	29	130	101	175
759	ENSG00000229344	2533.77	1.28278	0.233718	5.48856	4.05226e-08	8.55085e-07	MTCO2P12	NA	1.41345e-06	1518	889	2021	2752	4142	3880
760	ENSG00000125319	64.7569	-1.76276	0.321195	-5.48814	4.06195e-08	8.56002e-07	C17orf53	78995	1.41497e-06	80	132	87	27	36	26
761	ENSG00000213390	45.915	-1.92981	0.351781	-5.48583	4.11544e-08	8.66135e-07	ARHGAP19	84986	1.43172e-06	72	84	62	23	16	18
762	ENSG00000100764	657.606	-0.745126	0.135838	-5.48541	4.1251e-08	8.6703e-07	PSMC1	5700	1.4332e-06	820	823	829	503	493	479
763	ENSG00000123975	474.746	-1.05469	0.192343	-5.48338	4.17282e-08	8.7591e-07	CKS2	1164	1.44788e-06	675	619	628	227	394	305
764	ENSG00000188505	53.5184	1.78539	0.326338	5.47097	4.47578e-08	9.38274e-07	NCCRP1	342897	1.55097e-06	26	22	25	65	91	93
765	ENSG00000130513	763.029	2.61106	0.477731	5.46554	4.61492e-08	9.66178e-07	GDF15	9518	1.59709e-06	143	153	349	1590	913	1431
766	ENSG00000142871	241.047	1.23188	0.22544	5.46433	4.64645e-08	9.71509e-07	CYR61	3491	1.6059e-06	129	183	119	350	257	407
767	ENSG00000120314	323.399	0.887035	0.162422	5.46131	4.72639e-08	9.86934e-07	WDR55	54853	1.6314e-06	225	241	215	403	409	448
768	ENSG00000167552	3288.87	-0.856372	0.156848	-5.4599	4.76405e-08	9.93502e-07	TUBA1A	7846	1.64226e-06	4556	4791	3364	2343	2538	2141
769	ENSG00000168066	1880.48	-0.928976	0.170204	-5.45802	4.81467e-08	1.00275e-06	SF1	7536	1.65755e-06	2637	2868	1893	1437	1301	1148
770	ENSG00000153904	341.756	0.956761	0.175456	5.45299	4.95309e-08	1.03024e-06	DDAH1	23576	1.70299e-06	244	232	221	477	503	373
771	ENSG00000243147	1045.89	0.737872	0.13533	5.45238	4.97003e-08	1.03243e-06	MRPL33	9553	1.7066e-06	758	771	824	1276	1222	1424
772	ENSG00000213614	330.738	0.966478	0.177302	5.45103	5.00778e-08	1.03892e-06	HEXA	3073	1.71733e-06	220	209	244	441	371	501
773	ENSG00000129173	52.5409	-2.03473	0.373293	-5.45076	5.01555e-08	1.03918e-06	E2F8	79733	1.71777e-06	95	98	60	14	32	16
774	ENSG00000239521	166.151	1.1573	0.212577	5.44413	5.20599e-08	1.07725e-06	GATS	352954	1.78069e-06	94	98	117	230	194	264
775	ENSG00000174564	100.816	-1.80427	0.33155	-5.44192	5.27089e-08	1.08927e-06	IL20RB	53833	1.80056e-06	112	140	218	70	35	30
776	ENSG00000129493	297.262	0.994543	0.182793	5.44082	5.30349e-08	1.0946e-06	HEATR5A	25938	1.80937e-06	236	186	173	405	359	424
777	ENSG00000164300	233.673	0.997436	0.183467	5.43659	5.43093e-08	1.11946e-06	SERINC5	256987	1.85046e-06	164	142	161	311	344	279
778	ENSG00000150093	9077.43	0.716705	0.131846	5.43594	5.45091e-08	1.12213e-06	ITGB1	3688	1.85488e-06	7177	7092	6335	12526	10115	11220
779	ENSG00000109790	331.565	-0.951765	0.17517	-5.43337	5.53005e-08	1.1359e-06	KLHL5	51088	1.87763e-06	429	458	425	270	199	209
780	ENSG00000168439	4001.62	-0.756455	0.139225	-5.43331	5.53196e-08	1.1359e-06	STIP1	10963	1.87763e-06	5264	5147	4671	3270	3122	2535
781	ENSG00000087086	73824.5	-0.651718	0.120019	-5.43014	5.63113e-08	1.15478e-06	FTL	2512	1.90885e-06	89023	89272	92368	55425	62919	53940
782	ENSG00000166589	22.6914	4.07681	0.751052	5.42814	5.69456e-08	1.16629e-06	CDH16	1014	1.92788e-06	4	2	1	11	60	57
783	ENSG00000197712	371.942	0.909373	0.167544	5.42766	5.70974e-08	1.16791e-06	FAM114A1	92689	1.93055e-06	279	274	222	455	473	529
784	ENSG00000111801	42.331	1.9825	0.365519	5.4238	5.83467e-08	1.19143e-06	BTN3A3	10384	1.96943e-06	15	15	22	72	55	76
785	ENSG00000116350	474.5	-0.893356	0.164715	-5.42364	5.83962e-08	1.19143e-06	SRSF4	6429	1.96943e-06	640	626	584	274	371	353
786	ENSG00000100196	565.142	0.863082	0.159145	5.42323	5.85307e-08	1.19266e-06	KDELR3	11015	1.97146e-06	415	351	437	747	795	646
787	ENSG00000130726	5224.61	-0.784406	0.144945	-5.41174	6.2415e-08	1.27019e-06	TRIM28	10155	2.09962e-06	6830	7263	5741	4307	3820	3388
788	ENSG00000115758	2057.24	-0.781787	0.144491	-5.41063	6.28026e-08	1.27645e-06	ODC1	4953	2.10998e-06	2785	2798	2221	1559	1612	1369
789	ENSG00000112640	329.391	-1.06599	0.197048	-5.40981	6.30901e-08	1.28067e-06	PPP2R5D	5528	2.11695e-06	471	473	394	258	222	159
790	ENSG00000088367	2453.62	0.665751	0.123171	5.4051	6.47719e-08	1.31315e-06	EPB41L1	2036	2.17063e-06	2004	1867	1821	3180	2901	2949
791	ENSG00000182199	1613.53	-0.741151	0.137168	-5.40324	6.54482e-08	1.32518e-06	SHMT2	6472	2.19052e-06	1846	2259	1953	1271	1221	1131
792	ENSG00000135362	176.546	1.65085	0.30602	5.39459	6.86805e-08	1.38887e-06	PRR5L	79899	2.2958e-06	98	82	75	126	317	361
793	ENSG00000171848	498.79	-1.44205	0.267399	-5.39288	6.93384e-08	1.40041e-06	RRM2	6241	2.31487e-06	771	899	517	205	416	184
794	ENSG00000081052	363.953	1.13953	0.211365	5.39129	6.99545e-08	1.41107e-06	COL4A4	1286	2.3325e-06	314	175	192	473	522	507
795	ENSG00000113889	20.2573	4.07771	0.756555	5.38984	7.05186e-08	1.42066e-06	KNG1	3827	2.34835e-06	2	1	4	14	41	59
796	ENSG00000179967	742.053	-0.784706	0.145628	-5.38844	7.10713e-08	1.43e-06	PPP1R14BP3	NA	2.36378e-06	912	1019	886	512	603	521
797	ENSG00000107679	318.385	0.906556	0.168423	5.38262	7.34108e-08	1.47522e-06	PLEKHA1	59338	2.43853e-06	244	207	214	442	377	427
798	ENSG00000065150	1409.49	-0.844343	0.157017	-5.3774	7.5568e-08	1.51666e-06	IPO5	3843	2.50704e-06	1872	1917	1643	1194	991	840
799	ENSG00000147535	542.206	0.972429	0.18085	5.37698	7.5744e-08	1.51829e-06	PLPP5	84513	2.50974e-06	418	347	332	561	792	802
800	ENSG00000164535	261.356	1.12136	0.208679	5.37364	7.71621e-08	1.54479e-06	DAGLB	221955	2.55353e-06	160	165	170	455	270	349
801	ENSG00000100949	308.769	0.908926	0.169199	5.37195	7.78909e-08	1.55659e-06	RABGGTA	5875	2.57304e-06	205	240	198	416	374	419
802	ENSG00000129810	74.7945	-1.93048	0.359371	-5.37182	7.79461e-08	1.55659e-06	SGO1	151648	2.57304e-06	114	119	122	16	56	22
803	ENSG00000261115	205.606	1.0619	0.197757	5.36972	7.88597e-08	1.57287e-06	TMEM178B	100507421	2.59996e-06	155	125	118	249	310	276
804	ENSG00000167996	6502.47	-1.01944	0.189892	-5.36851	7.93893e-08	1.58147e-06	FTH1	2495	2.61416e-06	8766	10173	7188	5556	4077	3256
805	ENSG00000166734	378.117	0.903142	0.168251	5.36783	7.9691e-08	1.58505e-06	CASC4	113201	2.62008e-06	263	283	244	424	514	541
806	ENSG00000278133	38.0842	2.05107	0.382116	5.36766	7.97669e-08	1.58505e-06	RP11-196G11.5	NA	2.62008e-06	14	14	16	49	65	71
807	ENSG00000123066	625.691	-0.751682	0.140093	-5.36559	8.06862e-08	1.60133e-06	MED13L	23389	2.64699e-06	746	813	797	484	446	468
808	ENSG00000005206	215.668	1.04656	0.195093	5.36445	8.11948e-08	1.60943e-06	SPPL2B	56928	2.66038e-06	140	118	165	264	300	308
809	ENSG00000126709	61.9637	1.87665	0.350093	5.36043	8.30248e-08	1.64367e-06	IFI6	2537	2.71698e-06	21	27	31	57	117	119
810	ENSG00000107984	1710.2	0.943271	0.176053	5.35787	8.42094e-08	1.66506e-06	DKK1	22943	2.75234e-06	1039	1235	1237	1675	2393	2683
811	ENSG00000267100	78.2032	-1.51958	0.283948	-5.3516	8.718e-08	1.72167e-06	ILF3-AS1	147727	2.84592e-06	132	113	103	29	48	45
812	ENSG00000185104	525.691	-0.780344	0.145856	-5.35011	8.79014e-08	1.73378e-06	FAF1	11124	2.86593e-06	626	657	710	388	374	399
813	ENSG00000175166	2355.94	-0.743079	0.138921	-5.34892	8.84814e-08	1.74307e-06	PSMD2	5708	2.88129e-06	3133	3033	2683	1986	1701	1600
814	ENSG00000162878	729.079	1.29413	0.242017	5.34726	8.92973e-08	1.75698e-06	PKDCC	91461	2.90429e-06	404	393	470	664	879	1564
815	ENSG00000228218	224.053	-1.30395	0.243876	-5.34679	8.95263e-08	1.75933e-06	ATF4P3	NA	2.90817e-06	242	259	457	139	124	124
816	ENSG00000213626	240.181	1.36248	0.254961	5.34389	9.09708e-08	1.78552e-06	LBH	81606	2.95147e-06	91	180	133	450	262	326
817	ENSG00000157168	236.309	1.2127	0.226948	5.34353	9.11561e-08	1.78697e-06	NRG1	3084	2.95386e-06	121	170	137	425	246	320
818	ENSG00000183207	1883.76	-0.709882	0.132864	-5.34293	9.14542e-08	1.79062e-06	RUVBL2	10856	2.9599e-06	2251	2496	2267	1582	1364	1341
819	ENSG00000127423	57.4843	-1.65541	0.309985	-5.34029	9.27968e-08	1.81469e-06	AUNIP	79000	2.99968e-06	86	100	76	28	31	25
820	ENSG00000268621	169.363	3.02579	0.566774	5.33861	9.36615e-08	1.82937e-06	AC006262.5	NA	3.02394e-06	28	35	48	525	176	204
821	ENSG00000123219	79.6573	-1.55371	0.291128	-5.33685	9.45739e-08	1.84494e-06	CENPK	64105	3.04968e-06	134	121	102	34	56	32
822	ENSG00000127663	175.876	1.06673	0.200022	5.33307	9.65672e-08	1.88153e-06	KDM4B	23030	3.11017e-06	120	123	99	261	217	237
823	ENSG00000185624	11818	0.633571	0.118883	5.32935	9.85636e-08	1.9181e-06	P4HB	5034	3.17061e-06	10054	8890	8847	14363	14615	14139
824	ENSG00000064115	1012.05	0.908576	0.17067	5.32358	1.01742e-07	1.97755e-06	TM7SF3	51768	3.26888e-06	750	679	681	1618	1040	1303
825	ENSG00000137968	29.2597	2.47853	0.465876	5.32016	1.03679e-07	2.01275e-06	SLC44A5	204962	3.32707e-06	13	6	7	38	51	60
826	ENSG00000117385	430.093	0.865428	0.16272	5.31851	1.04618e-07	2.02852e-06	P3H1	64175	3.35314e-06	316	317	282	516	515	635
827	ENSG00000000971	3559.74	1.14573	0.215527	5.31591	1.06124e-07	2.05524e-06	CFH	3075	3.39731e-06	2267	1518	2864	3583	5509	5619
828	ENSG00000119943	102.282	1.3375	0.251633	5.31529	1.06487e-07	2.05977e-06	PYROXD2	100302133	3.40479e-06	71	54	48	154	126	160
829	ENSG00000091262	100.24	1.70399	0.32071	5.31316	1.07738e-07	2.08147e-06	ABCC6	105369239	3.44067e-06	44	44	53	81	171	209
830	ENSG00000148773	2934.97	-2.38912	0.449687	-5.31284	1.07929e-07	2.08165e-06	MKI67	4288	3.44096e-06	5974	5267	3546	809	1442	573
831	ENSG00000247134	112.925	1.37462	0.258741	5.31271	1.08008e-07	2.08165e-06	RP11-11N9.4	NA	3.44096e-06	60	56	73	118	176	195
832	ENSG00000248527	24003.9	1.17246	0.220795	5.31017	1.09524e-07	2.10834e-06	MTATP6P1	NA	3.48508e-06	14133	9914	20215	25511	40728	33524
833	ENSG00000105929	27.9895	2.39866	0.451999	5.30679	1.11572e-07	2.14518e-06	ATP6V0A4	50617	3.54598e-06	12	9	6	48	42	51
834	ENSG00000214182	60.692	-1.64619	0.310644	-5.29927	1.16269e-07	2.23282e-06	PTMAP5	NA	3.69085e-06	94	100	82	34	34	20
835	ENSG00000166889	616.283	-0.898436	0.169583	-5.29792	1.17129e-07	2.24663e-06	PATL1	219988	3.71367e-06	813	788	805	359	534	399
836	ENSG00000128951	333.962	-0.959719	0.181233	-5.29549	1.18698e-07	2.27401e-06	DUT	1854	3.75893e-06	445	491	387	188	248	245
837	ENSG00000006025	56.1416	1.70377	0.321885	5.29312	1.20246e-07	2.3009e-06	OSBPL7	114881	3.80339e-06	26	24	30	91	66	101
838	ENSG00000125944	1126.75	-0.711056	0.134527	-5.28562	1.25282e-07	2.39317e-06	HNRNPR	10236	3.9559e-06	1430	1469	1298	866	903	794
839	ENSG00000130733	188.368	1.02122	0.193213	5.28549	1.25366e-07	2.39317e-06	YIPF2	78992	3.9559e-06	129	128	115	278	227	252
840	ENSG00000138678	168.294	-1.1393	0.215616	-5.28392	1.26451e-07	2.411e-06	GPAT3	84803	3.98538e-06	228	225	242	129	105	81
841	ENSG00000148848	169.915	1.10663	0.209469	5.28302	1.27071e-07	2.41993e-06	ADAM12	8038	4.00014e-06	128	107	87	218	232	247
842	ENSG00000120915	157.223	1.11596	0.211293	5.28157	1.28082e-07	2.4363e-06	EPHX2	2053	4.0272e-06	94	89	115	197	205	243
843	ENSG00000163507	133.7	-1.35641	0.256874	-5.28043	1.28884e-07	2.44864e-06	KIAA1524	57650	4.0476e-06	230	194	152	66	101	59
844	ENSG00000164070	423.735	0.951804	0.180263	5.28008	1.29128e-07	2.45037e-06	HSPA4L	22824	4.05045e-06	328	297	241	656	515	505
845	ENSG00000170836	158.65	1.14834	0.21754	5.27873	1.30085e-07	2.46562e-06	PPM1D	8493	4.07566e-06	112	76	107	240	199	217
846	ENSG00000128692	626.042	-0.859941	0.163007	-5.27548	1.3241e-07	2.50672e-06	EIF2S2P4	NA	4.1436e-06	734	750	938	457	487	390
847	ENSG00000131015	57.5708	1.64574	0.312157	5.27217	1.34824e-07	2.54939e-06	ULBP2	80328	4.21414e-06	29	30	25	92	70	99
848	ENSG00000196230	10568.2	-0.954145	0.181001	-5.27148	1.35326e-07	2.55587e-06	TUBB	203068	4.22485e-06	15045	16092	10685	7740	8214	5633
849	ENSG00000197119	72.359	1.63115	0.309535	5.26968	1.36665e-07	2.57779e-06	SLC25A29	123096	4.26108e-06	34	41	31	88	91	150
850	ENSG00000069399	1193.92	-0.910087	0.172709	-5.26948	1.36808e-07	2.57779e-06	BCL3	102465879	4.26108e-06	1428	1400	1848	673	977	838
851	ENSG00000204560	264.958	-0.928195	0.17642	-5.26127	1.43066e-07	2.69098e-06	DHX16	8449	4.44818e-06	388	343	311	179	190	179
852	ENSG00000197375	642.936	0.931058	0.176968	5.26116	1.43151e-07	2.69098e-06	SLC22A5	6584	4.44818e-06	540	421	366	879	727	925
853	ENSG00000141858	384.788	-0.834945	0.158742	-5.25977	1.44233e-07	2.70812e-06	SAMD1	NA	4.47652e-06	474	525	480	295	283	251
854	ENSG00000180964	132.406	1.69271	0.321917	5.25821	1.45462e-07	2.72801e-06	TCEAL8	90843	4.5094e-06	62	45	80	103	223	280
855	ENSG00000079385	179.246	1.25313	0.238468	5.25492	1.48086e-07	2.77397e-06	CEACAM1	634	4.58536e-06	128	67	123	244	275	239
856	ENSG00000254598	216.405	-1.01778	0.193939	-5.24793	1.53816e-07	2.87627e-06	CSNK2A3	283106	4.75446e-06	307	301	261	161	149	119
857	ENSG00000230590	31.7758	2.54118	0.484236	5.24782	1.53906e-07	2.87627e-06	FTX	100302692	4.75446e-06	8	14	6	31	54	78
858	ENSG00000185480	99.2016	-1.47596	0.2814	-5.24504	1.5625e-07	2.91666e-06	PARPBP	55010	4.82124e-06	170	153	114	47	72	39
859	ENSG00000261786	20.3397	4.0878	0.77941	5.24474	1.56505e-07	2.91803e-06	RP4-555D20.2	NA	4.8235e-06	2	2	3	14	26	75
860	ENSG00000272398	5478.81	0.822688	0.157034	5.23891	1.6153e-07	3.00769e-06	CD24	100133941	4.97171e-06	4474	3759	3640	8346	6808	5846
861	ENSG00000265415	33.04	-2.22553	0.424823	-5.23873	1.6169e-07	3.00769e-06	CTD-2510F5.4	NA	4.97171e-06	66	53	44	10	16	9
862	ENSG00000163576	149.289	1.19082	0.227413	5.23639	1.63745e-07	3.04239e-06	EFHB	151651	5.02907e-06	99	90	83	169	257	197
863	ENSG00000166033	523.82	1.05837	0.202154	5.23547	1.64567e-07	3.05412e-06	HTRA1	5654	5.04846e-06	391	294	334	500	799	825
864	ENSG00000127125	517.326	0.780033	0.149068	5.23275	1.67011e-07	3.09588e-06	PPCS	79717	5.11748e-06	403	347	392	618	685	659
865	ENSG00000142192	3080.92	0.730332	0.139583	5.23224	1.67468e-07	3.10077e-06	APP	351	5.12556e-06	2327	2185	2440	4447	3476	3610
866	ENSG00000170689	98.5115	-1.34286	0.256675	-5.23177	1.67898e-07	3.10279e-06	HOXB9	3219	5.12891e-06	112	143	169	60	51	56
867	ENSG00000005156	346.981	-0.898941	0.171826	-5.23169	1.67965e-07	3.10279e-06	LIG3	3980	5.12891e-06	464	475	416	247	274	206
868	ENSG00000173702	6584.21	0.831767	0.159023	5.23047	1.69081e-07	3.118e-06	MUC13	56667	5.15405e-06	5695	4065	4451	8447	9518	7330
869	ENSG00000070540	182.607	1.16013	0.221807	5.23036	1.69177e-07	3.118e-06	WIPI1	55062	5.15405e-06	120	79	140	260	259	238
870	ENSG00000244405	245.384	-0.901436	0.172392	-5.229	1.70433e-07	3.13754e-06	ETV5	2119	5.18635e-06	310	324	326	180	162	171
871	ENSG00000060656	386.05	0.879375	0.168197	5.22823	1.71141e-07	3.14695e-06	PTPRU	10076	5.2019e-06	278	240	297	450	493	558
872	ENSG00000184371	129.219	1.17356	0.22451	5.2272	1.72099e-07	3.16094e-06	CSF1	1435	5.22503e-06	78	79	81	189	147	201
873	ENSG00000100612	672.415	0.881003	0.168702	5.22225	1.76759e-07	3.24281e-06	DHRS7	51635	5.36036e-06	445	420	555	742	890	983
874	ENSG00000226608	878.676	-0.820811	0.157271	-5.21907	1.7982e-07	3.29518e-06	FTLP3	NA	5.44693e-06	1180	1067	1120	631	747	529
875	ENSG00000188191	344.322	0.890726	0.17068	5.2187	1.80182e-07	3.29805e-06	PRKAR1B	5575	5.45167e-06	240	262	222	503	395	444
876	ENSG00000161714	1839.68	0.858601	0.164607	5.21607	1.82763e-07	3.34148e-06	PLCD3	113026	5.52346e-06	1271	1382	1271	2987	2043	2084
877	ENSG00000188976	1159.83	-0.734959	0.140934	-5.21493	1.8389e-07	3.35825e-06	NOC2L	26155	5.55118e-06	1533	1499	1315	965	833	815
878	ENSG00000001084	618.232	-0.746299	0.143262	-5.20931	1.89543e-07	3.45755e-06	GCLC	2729	5.71532e-06	736	750	838	457	483	446
879	ENSG00000069812	40.1883	2.24056	0.430353	5.20633	1.92615e-07	3.50959e-06	HES2	54626	5.80134e-06	16	16	10	97	37	65
880	ENSG00000169031	76.3801	1.69804	0.326877	5.19473	2.05013e-07	3.73124e-06	COL4A3	1285	6.16774e-06	37	33	38	78	100	173
881	ENSG00000006282	612.905	0.720764	0.138844	5.19116	2.08988e-07	3.79926e-06	SPATA20	64847	6.28016e-06	467	446	476	775	734	780
882	ENSG00000130517	239.168	0.994273	0.191587	5.18967	2.10671e-07	3.82552e-06	PGPEP1	54858	6.32358e-06	177	137	166	360	319	277
883	ENSG00000113583	317.932	0.857433	0.165227	5.18942	2.10947e-07	3.8262e-06	C5orf15	56951	6.32469e-06	236	217	225	393	386	451
884	ENSG00000132792	555.607	-0.792987	0.152836	-5.18847	2.12032e-07	3.84153e-06	CTNNBL1	56259	6.35004e-06	721	663	730	441	425	355
885	ENSG00000181026	1082.59	0.754357	0.145416	5.18758	2.1304e-07	3.85542e-06	AEN	64782	6.37301e-06	785	829	803	1310	1203	1565
886	ENSG00000123838	157.033	1.33025	0.256508	5.18598	2.14887e-07	3.88365e-06	C4BPA	722	6.41967e-06	78	74	117	158	259	256
887	ENSG00000105968	1093.7	-0.894184	0.172429	-5.1858	2.15085e-07	3.88365e-06	H2AFV	94239	6.41967e-06	1435	1484	1347	610	969	717
888	ENSG00000165118	172.171	-1.06418	0.205244	-5.18495	2.16069e-07	3.89702e-06	C9orf64	84267	6.44177e-06	220	230	249	101	133	99
889	ENSG00000101003	321.105	-1.23353	0.238106	-5.18058	2.21192e-07	3.98494e-06	GINS1	9837	6.58709e-06	497	571	284	162	226	188
890	ENSG00000108883	1978.62	-0.696096	0.134376	-5.1802	2.21647e-07	3.98864e-06	EFTUD2	9343	6.59321e-06	2551	2589	2200	1634	1483	1414
891	ENSG00000186792	92.4493	1.27052	0.2453	5.17945	2.22541e-07	4.00025e-06	HYAL3	8372	6.6124e-06	58	50	54	136	119	137
892	ENSG00000111907	676.398	1.10529	0.213414	5.17908	2.22983e-07	4.0037e-06	TPD52L1	7164	6.61811e-06	468	325	495	649	1138	984
893	ENSG00000074276	63.4593	2.20697	0.426245	5.1777	2.24643e-07	4.02898e-06	CDHR2	54825	6.6599e-06	31	15	22	41	154	119
894	ENSG00000121005	238.521	0.979218	0.189272	5.17359	2.29642e-07	4.11202e-06	CRISPLD1	83690	6.79716e-06	172	175	134	344	284	322
895	ENSG00000164985	446.379	-0.930958	0.179949	-5.17347	2.29786e-07	4.11202e-06	PSIP1	11168	6.79716e-06	539	563	655	255	375	292
896	ENSG00000079246	4023.98	-0.714378	0.138177	-5.17003	2.3405e-07	4.18365e-06	XRCC5	7520	6.91556e-06	5066	4808	5127	3024	3487	2632
897	ENSG00000169692	381.922	-0.80069	0.154896	-5.1692	2.351e-07	4.19772e-06	AGPAT2	10555	6.93882e-06	467	485	504	262	293	281
898	ENSG00000143878	2957.73	0.70314	0.136128	5.1653	2.40058e-07	4.28148e-06	RHOB	388	7.07728e-06	2398	2336	2017	3295	3729	3970
899	ENSG00000158106	55.8963	1.67626	0.324548	5.16491	2.40555e-07	4.28557e-06	RHPN1	114822	7.08404e-06	26	29	25	92	62	100
900	ENSG00000244509	907.28	1.01567	0.196681	5.16407	2.41636e-07	4.30004e-06	APOBEC3C	27350	7.10796e-06	559	605	637	1658	1006	978
901	ENSG00000181513	113.601	1.2367	0.239546	5.16266	2.43468e-07	4.32785e-06	ACBD4	79777	7.15392e-06	68	73	63	171	127	180
902	ENSG00000138031	185.807	-1.11746	0.216507	-5.16133	2.45204e-07	4.35387e-06	ADCY3	109	7.19693e-06	270	294	198	123	128	100
903	ENSG00000119514	85.662	1.36509	0.264525	5.16054	2.46233e-07	4.3673e-06	GALNT12	79695	7.21914e-06	48	44	51	98	133	138
904	ENSG00000105825	3090.35	1.13992	0.220922	5.15984	2.47161e-07	4.37891e-06	TFPI2	7980	7.23832e-06	1809	2638	1341	5301	3255	4198
905	ENSG00000115159	409.963	-1.01127	0.196066	-5.1578	2.49862e-07	4.42187e-06	GPD2	2820	7.30934e-06	600	574	471	333	280	203
906	ENSG00000133706	1104.79	-0.777188	0.150734	-5.15602	2.52254e-07	4.45927e-06	LARS	51520	7.37116e-06	1404	1444	1338	948	805	690
907	ENSG00000108349	615.056	-0.741194	0.143782	-5.155	2.53637e-07	4.47878e-06	CASC3	102466986	7.40342e-06	722	784	803	481	473	426
908	ENSG00000151176	1113.19	0.704679	0.136795	5.15136	2.58605e-07	4.56148e-06	PLBD2	196463	7.54011e-06	908	795	836	1346	1501	1293
909	ENSG00000228519	74.6664	-1.58553	0.307853	-5.15028	2.60104e-07	4.58287e-06	RP11-298C3.2	NA	7.57548e-06	99	138	99	41	48	24
910	ENSG00000163535	77.6417	-1.58997	0.308895	-5.14729	2.64281e-07	4.65135e-06	SGO2	151246	7.68868e-06	123	123	104	41	54	22
911	ENSG00000128656	108.786	-1.27027	0.246816	-5.14664	2.652e-07	4.6624e-06	CHN1	1123	7.70693e-06	158	171	133	53	78	60
912	ENSG00000137054	395.129	-0.879718	0.170961	-5.14572	2.66498e-07	4.67768e-06	POLR1E	64425	7.7322e-06	493	543	500	332	257	245
913	ENSG00000102265	2036.48	0.71538	0.139027	5.14561	2.66654e-07	4.67768e-06	TIMP1	7076	7.7322e-06	1537	1349	1740	2575	2630	2389
914	ENSG00000051108	942.57	0.927565	0.180299	5.1446	2.68094e-07	4.69781e-06	HERPUD1	9709	7.76547e-06	625	544	779	987	1296	1423
915	ENSG00000162607	248.647	-1.16958	0.227569	-5.13945	2.75551e-07	4.82319e-06	USP1	7398	7.97272e-06	366	352	315	145	210	105
916	ENSG00000153187	6108.19	-0.731516	0.142427	-5.13608	2.80533e-07	4.90504e-06	HNRNPU	3192	8.10803e-06	7549	7465	7860	4669	5279	3828
917	ENSG00000163898	287.963	1.04657	0.203873	5.13344	2.8449e-07	4.96881e-06	LIPH	200879	8.21342e-06	216	147	201	470	350	344
918	ENSG00000127589	323.039	-1.07863	0.210129	-5.13316	2.84916e-07	4.97082e-06	TUBBP1	NA	8.21675e-06	478	503	334	255	200	168
919	ENSG00000169174	860.86	-0.795119	0.154981	-5.13044	2.89072e-07	5.03783e-06	PCSK9	255738	8.32753e-06	1058	1253	965	584	604	701
920	ENSG00000198554	170.392	-1.12858	0.22002	-5.12944	2.90604e-07	5.05903e-06	WDHD1	11169	8.36257e-06	262	255	184	114	117	90
921	ENSG00000068650	375.362	1.06154	0.206998	5.12829	2.92392e-07	5.08463e-06	ATP11A	23250	8.40488e-06	298	254	177	435	487	602
922	ENSG00000280798	197.331	1.00888	0.196855	5.12498	2.97575e-07	5.16915e-06	LINC00294	283267	8.5446e-06	122	139	132	223	297	272
923	ENSG00000198744	10066	1.19728	0.233638	5.12449	2.98351e-07	5.17703e-06	MTCO3P12	NA	8.55762e-06	6087	3685	8568	11646	17380	13029
924	ENSG00000109472	170.793	1.32091	0.257808	5.12362	2.99732e-07	5.19536e-06	CPE	1363	8.58792e-06	79	108	106	162	244	326
925	ENSG00000173227	58.3715	1.59291	0.310954	5.12266	3.01256e-07	5.21613e-06	SYT12	91683	8.62226e-06	34	30	23	75	100	89
926	ENSG00000124564	106.033	1.90666	0.372361	5.12046	3.04791e-07	5.27164e-06	SLC17A3	10786	8.71401e-06	67	25	41	78	215	210
927	ENSG00000106070	342.304	-1.01471	0.198197	-5.11972	3.05988e-07	5.28662e-06	GRB10	2887	8.73877e-06	374	483	517	281	200	198
928	ENSG00000128928	236.799	0.963337	0.188276	5.11661	3.11079e-07	5.36879e-06	IVD	3712	8.8746e-06	166	170	146	332	264	343
929	ENSG00000169750	56.8636	-1.68503	0.329466	-5.11442	3.14705e-07	5.42554e-06	RAC3	5881	8.9684e-06	89	99	72	33	31	17
930	ENSG00000251562	609.222	2.22818	0.435811	5.11272	3.17554e-07	5.46877e-06	MALAT1	378938	9.03986e-06	204	176	262	531	1051	1431
931	ENSG00000102401	109.685	1.3477	0.263611	5.11245	3.18003e-07	5.4706e-06	ARMCX3	51566	9.04289e-06	80	39	66	159	160	154
932	ENSG00000106948	37.3399	-1.94931	0.381484	-5.10981	3.22482e-07	5.54171e-06	AKNA	80709	9.16044e-06	52	67	60	18	13	15
933	ENSG00000230124	561.205	-0.730708	0.143007	-5.10959	3.22856e-07	5.54218e-06	ACBD6	100527964	9.16122e-06	664	697	740	420	436	410
934	ENSG00000125967	241.324	0.996315	0.195065	5.10762	3.26242e-07	5.59076e-06	NECAB3	63941	9.24151e-06	178	159	146	373	265	327
935	ENSG00000224251	26.495	2.84351	0.556729	5.10754	3.26384e-07	5.59076e-06	RP11-499O7.7	NA	9.24151e-06	4	10	6	21	53	66
936	ENSG00000132436	123.001	-1.4168	0.277488	-5.1058	3.294e-07	5.6364e-06	FIGNL1	63979	9.31696e-06	206	222	109	64	74	64
937	ENSG00000204469	1778.3	-0.865338	0.169561	-5.10339	3.33614e-07	5.70242e-06	PRRC2A	7916	9.42609e-06	2490	2458	1940	1500	1273	1008
938	ENSG00000141012	498.68	0.730117	0.143177	5.0994	3.40727e-07	5.81778e-06	GALNS	2588	9.61679e-06	365	387	373	614	622	631
939	ENSG00000183337	576.884	-0.810615	0.159009	-5.09791	3.43416e-07	5.85745e-06	BCOR	54880	9.68235e-06	823	748	633	440	436	381
940	ENSG00000166582	268.33	-1.04517	0.205044	-5.09731	3.44509e-07	5.86986e-06	CENPV	201161	9.70286e-06	359	450	276	164	185	176
941	ENSG00000224877	627.745	0.752788	0.147711	5.09634	3.46276e-07	5.89368e-06	C17orf89	284184	9.74224e-06	464	506	433	815	717	832
942	ENSG00000133265	871.224	-0.775153	0.152151	-5.09462	3.49441e-07	5.94125e-06	HSPBP1	23640	9.82087e-06	1147	1229	922	668	642	618
943	ENSG00000162062	82.2441	-1.53637	0.302103	-5.08559	3.66485e-07	6.22442e-06	C16orf59	80178	1.0289e-05	120	160	87	32	50	45
944	ENSG00000125746	562.832	0.820119	0.161308	5.08418	3.69223e-07	6.26428e-06	EML2	442902	1.03548e-05	391	383	447	694	632	829
945	ENSG00000108344	1806.01	-0.627173	0.123399	-5.08246	3.72572e-07	6.3144e-06	PSMD3	5709	1.04377e-05	2131	2236	2211	1496	1412	1351
946	ENSG00000109674	110.419	-1.28558	0.253043	-5.08047	3.76507e-07	6.37436e-06	NEIL3	55247	1.05368e-05	145	157	168	78	71	44
947	ENSG00000214655	181.444	1.10812	0.21814	5.07984	3.77756e-07	6.38875e-06	ZSWIM8	23053	1.05606e-05	130	115	100	247	198	299
948	ENSG00000187608	58.7526	1.59703	0.314456	5.0787	3.80023e-07	6.42031e-06	ISG15	9636	1.06128e-05	28	38	22	78	92	95
949	ENSG00000160255	36.5661	2.19017	0.431272	5.07839	3.80656e-07	6.42423e-06	ITGB2	3689	1.06192e-05	16	7	16	41	59	80
950	ENSG00000164051	353.013	0.858558	0.169145	5.07586	3.8574e-07	6.50317e-06	CCDC51	79714	1.07497e-05	256	248	249	475	386	504
951	ENSG00000125520	642.719	-0.798613	0.157347	-5.07548	3.86522e-07	6.5095e-06	SLC2A4RG	56731	1.07602e-05	836	925	687	480	477	451
952	ENSG00000264230	1917.32	0.905108	0.178435	5.07248	3.92671e-07	6.60121e-06	ANXA8L1	728113	1.09118e-05	1295	1481	1229	3155	1902	2442
953	ENSG00000258498	65.2499	1.46531	0.288877	5.07242	3.92792e-07	6.60121e-06	DIO3OS	100302145	1.09118e-05	34	35	35	105	79	102
954	ENSG00000161981	532.53	-0.805027	0.158914	-5.06581	4.06666e-07	6.82721e-06	SNRNP25	79622	1.12854e-05	681	740	611	359	440	365
955	ENSG00000106628	1511.08	-0.82043	0.162023	-5.06367	4.11263e-07	6.89716e-06	POLD2	5425	1.1401e-05	2109	2086	1593	1218	1137	923
956	ENSG00000111371	1719.04	-0.785726	0.155247	-5.06114	4.16762e-07	6.98206e-06	SLC38A1	81539	1.15413e-05	2203	2109	2216	1360	1430	997
957	ENSG00000149554	239.221	-1.00214	0.198038	-5.06033	4.1854e-07	7.00453e-06	CHEK1	1111	1.15785e-05	342	329	286	150	196	132
958	ENSG00000136518	365.115	-0.919508	0.181725	-5.05988	4.19531e-07	7.01379e-06	ACTL6A	86	1.15938e-05	451	498	483	216	315	227
959	ENSG00000114770	88.4	1.3709	0.271221	5.05453	4.31442e-07	7.20232e-06	ABCC5	10057	1.19054e-05	43	55	50	135	96	151
960	ENSG00000114857	134.802	1.60097	0.316747	5.05442	4.31708e-07	7.20232e-06	NKTR	4820	1.19054e-05	73	70	58	117	165	326
961	ENSG00000117394	1485.49	0.779572	0.154254	5.05381	4.33088e-07	7.21784e-06	SLC2A1	6513	1.19311e-05	1310	1052	918	1915	1783	1936
962	ENSG00000087087	971.895	-0.876632	0.173547	-5.05127	4.38893e-07	7.30698e-06	SRRT	51593	1.20784e-05	1359	1424	992	581	763	713
963	ENSG00000180694	263.23	0.907653	0.179717	5.05047	4.4073e-07	7.32995e-06	TMEM64	169200	1.21164e-05	206	185	157	368	336	327
964	ENSG00000112299	25.5544	2.56837	0.508602	5.04987	4.42108e-07	7.34523e-06	VNN1	8876	1.21417e-05	8	6	8	63	28	41
965	ENSG00000130768	58.2697	1.54606	0.306303	5.0475	4.47619e-07	7.42908e-06	SMPDL3B	27293	1.22803e-05	24	30	35	87	77	96
966	ENSG00000164520	54.8666	1.57267	0.311805	5.04375	4.56506e-07	7.56874e-06	RAET1E	135250	1.25111e-05	29	26	28	71	80	95
967	ENSG00000168488	1071.12	-0.695568	0.137942	-5.04249	4.59519e-07	7.61081e-06	ATXN2L	11273	1.25806e-05	1233	1404	1337	896	765	792
968	ENSG00000172531	2290.49	-0.618172	0.122604	-5.04203	4.60631e-07	7.62086e-06	PPP1CA	5499	1.25973e-05	2823	2883	2615	1790	1883	1748
969	ENSG00000167680	76.6834	-1.89073	0.375007	-5.04184	4.61077e-07	7.62086e-06	SEMA6B	10501	1.25973e-05	111	169	83	55	25	17
970	ENSG00000100029	1537.77	-0.854557	0.169556	-5.03997	4.65593e-07	7.68757e-06	PES1	23481	1.27075e-05	1926	2094	1922	1397	984	904
971	ENSG00000131171	301.484	0.939152	0.186376	5.03902	4.67917e-07	7.71799e-06	SH3BGRL	6451	1.27578e-05	190	175	255	425	386	378
972	ENSG00000168615	1913.23	0.86039	0.170801	5.0374	4.719e-07	7.77567e-06	ADAM9	8754	1.28532e-05	1435	1503	1139	2952	1985	2465
973	ENSG00000180879	3049.46	0.710616	0.141147	5.03458	4.7889e-07	7.88273e-06	SSR4	6748	1.30301e-05	2219	2074	2648	3720	3509	4128
974	ENSG00000090266	806.128	0.750124	0.149003	5.0343	4.7961e-07	7.88649e-06	NDUFB2	4708	1.30363e-05	634	555	615	922	962	1150
975	ENSG00000117448	1123.12	0.664955	0.132112	5.03327	4.82187e-07	7.92073e-06	AKR1A1	10327	1.3093e-05	907	886	812	1351	1320	1462
976	ENSG00000136542	228.716	1.06653	0.212059	5.02942	4.9197e-07	8.07315e-06	GALNT5	11227	1.33449e-05	186	119	139	360	299	271
977	ENSG00000169241	469.027	0.851664	0.169402	5.02749	4.9695e-07	8.14652e-06	SLC50A1	55974	1.34662e-05	294	342	368	521	601	689
978	ENSG00000136527	1111.77	-0.770242	0.153222	-5.02698	4.98266e-07	8.15974e-06	TRA2B	6434	1.3488e-05	1546	1300	1358	777	961	729
979	ENSG00000116127	120.742	-1.1598	0.230858	-5.02388	5.06384e-07	8.27907e-06	ALMS1	7840	1.36853e-05	181	162	157	60	82	83
980	ENSG00000136888	420.266	0.889592	0.177075	5.0238	5.06586e-07	8.27907e-06	ATP6V1G1	9550	1.36853e-05	279	268	337	459	550	629
981	ENSG00000144063	4110.65	0.661718	0.131724	5.02352	5.0733e-07	8.28278e-06	MALL	7851	1.36914e-05	3269	3048	3235	4877	5678	4557
982	ENSG00000141338	29.5015	2.20063	0.438519	5.01831	5.21271e-07	8.50171e-06	ABCA8	10351	1.40533e-05	13	8	10	45	41	59
983	ENSG00000141378	437.323	0.824402	0.164291	5.01792	5.22336e-07	8.51041e-06	PTRH2	51651	1.40677e-05	299	350	298	533	508	635
984	ENSG00000106258	103.064	1.78542	0.355919	5.01637	5.26576e-07	8.57077e-06	CYP3A5	1577	1.41675e-05	51	25	63	85	165	230
985	ENSG00000213347	50.9868	-1.7243	0.343887	-5.01415	5.32681e-07	8.66134e-06	MXD3	83463	1.43172e-05	78	90	67	17	33	22
986	ENSG00000182378	331.161	-0.843316	0.168228	-5.01294	5.36059e-07	8.70743e-06	PLCXD1	55344	1.43934e-05	399	465	412	244	256	211
987	ENSG00000095319	616.572	-0.975533	0.195024	-5.00211	5.67074e-07	9.19864e-06	NUP188	23511	1.52053e-05	990	878	583	432	448	368
988	ENSG00000265190	2253.5	0.937906	0.187507	5.00198	5.67448e-07	9.19864e-06	ANXA8	107984085	1.52053e-05	1506	1743	1388	3833	2189	2861
989	ENSG00000198753	22.4497	2.94032	0.587906	5.00135	5.69301e-07	9.21933e-06	PLXNB3	5365	1.52395e-05	3	8	5	49	19	51
990	ENSG00000101986	86.2042	1.31792	0.263542	5.00083	5.70855e-07	9.23516e-06	ABCD1	215	1.52657e-05	54	41	52	145	112	112
991	ENSG00000108375	104.018	1.26441	0.252878	5.00009	5.73041e-07	9.26117e-06	RNF43	54894	1.53087e-05	59	61	64	110	167	163
992	ENSG00000162714	227.041	-0.915746	0.18328	-4.99642	5.84033e-07	9.42931e-06	ZNF496	84838	1.55866e-05	288	322	281	171	140	161
993	ENSG00000068028	90.9789	1.38197	0.276739	4.99378	5.92074e-07	9.5495e-06	RASSF1	11186	1.57853e-05	54	63	34	120	120	155
994	ENSG00000179715	276.095	1.02171	0.204634	4.99289	5.94831e-07	9.58433e-06	PCED1B	91523	1.58429e-05	150	157	241	398	353	359
995	ENSG00000186591	1141.07	0.84856	0.170054	4.98994	6.03969e-07	9.72177e-06	UBE2H	7328	1.60701e-05	844	701	900	1802	1313	1286
996	ENSG00000168243	79.0992	-1.46005	0.292794	-4.9866	6.14497e-07	9.88131e-06	GNG4	2786	1.63338e-05	128	120	100	39	58	30
997	ENSG00000132182	1227.4	-0.785298	0.157607	-4.98265	6.27206e-07	1.00756e-05	NUP210	23225	1.66549e-05	1711	1718	1232	923	896	885
998	ENSG00000065970	191.165	-0.938873	0.188569	-4.97894	6.39345e-07	1.02603e-05	FOXJ2	55810	1.69602e-05	267	239	248	141	122	130
999	ENSG00000174243	1716.77	-0.621893	0.124939	-4.97756	6.43921e-07	1.03183e-05	DDX23	9416	1.70561e-05	2161	2106	1976	1295	1347	1415
1000	ENSG00000051596	536.431	-0.745828	0.149841	-4.97746	6.44247e-07	1.03183e-05	THOC3	84321	1.70561e-05	687	727	602	390	412	401
1001	ENSG00000131844	1206.55	0.635263	0.127646	4.97674	6.46645e-07	1.03382e-05	MCCC2	64087	1.7089e-05	970	945	920	1497	1386	1521
1002	ENSG00000179262	726.384	-0.742534	0.149202	-4.9767	6.46782e-07	1.03382e-05	RAD23A	5886	1.7089e-05	909	890	928	588	580	462
1003	ENSG00000085999	35.929	-2.09433	0.420916	-4.97565	6.50288e-07	1.03839e-05	RAD54L	8438	1.71645e-05	65	74	36	16	13	12
1004	ENSG00000144283	519.024	-0.744555	0.14973	-4.97265	6.60424e-07	1.05352e-05	PKP4	8502	1.74147e-05	665	676	609	382	423	360
1005	ENSG00000214026	838.062	-0.689768	0.138799	-4.96955	6.71069e-07	1.06944e-05	MRPL23	107987373	1.76778e-05	1055	1076	973	658	679	587
1006	ENSG00000144802	29.5937	3.02416	0.608819	4.96726	6.79067e-07	1.08111e-05	NFKBIZ	64332	1.78707e-05	3	13	4	27	32	99
1007	ENSG00000050426	172.215	1.23409	0.248496	4.96622	6.82715e-07	1.08584e-05	LETMD1	25875	1.79488e-05	104	75	130	250	180	295
1008	ENSG00000126351	297.287	-0.840621	0.169445	-4.96103	7.01193e-07	1.11412e-05	THRA	7067	1.84163e-05	373	395	376	193	239	207
1009	ENSG00000112576	4048.16	0.73427	0.148015	4.96077	7.02146e-07	1.11453e-05	CCND3	896	1.84231e-05	3404	3236	2478	5296	4697	5177
1010	ENSG00000008441	125.976	-1.08264	0.218291	-4.95963	7.06267e-07	1.11996e-05	NFIX	4784	1.85129e-05	171	177	165	74	91	78
1011	ENSG00000145362	39.4117	-1.92938	0.389289	-4.95617	7.18972e-07	1.13898e-05	ANK2	287	1.88273e-05	46	81	60	19	14	16
1012	ENSG00000185222	444.749	0.738057	0.149001	4.95338	7.29363e-07	1.1543e-05	TCEAL9	51186	1.90805e-05	336	326	337	521	584	564
1013	ENSG00000244414	288.435	1.43577	0.289904	4.95257	7.32397e-07	1.15795e-05	CFHR1	3078	1.9141e-05	144	88	235	278	504	481
1014	ENSG00000108602	6970.46	2.095	0.423076	4.95182	7.35217e-07	1.16127e-05	ALDH3A1	218	1.91957e-05	2953	2459	2521	17784	7779	8328
1015	ENSG00000115520	177.453	1.12929	0.228066	4.95161	7.36038e-07	1.16142e-05	COQ10B	80219	1.91982e-05	85	105	145	226	225	280
1016	ENSG00000129351	2059.6	-0.680332	0.137446	-4.94982	7.42818e-07	1.17041e-05	ILF3	3609	1.93468e-05	2580	2815	2215	1633	1614	1501
1017	ENSG00000108784	453.702	0.843484	0.17041	4.94972	7.43198e-07	1.17041e-05	NAGLU	4669	1.93468e-05	311	325	338	471	623	654
1018	ENSG00000070081	908.129	0.967589	0.195512	4.94899	7.45983e-07	1.17364e-05	NUCB2	105376575	1.94003e-05	617	476	751	940	1447	1218
1019	ENSG00000186815	1067.25	0.785695	0.158815	4.94724	7.52744e-07	1.18312e-05	TPCN1	53373	1.95569e-05	899	736	716	1555	1173	1326
1020	ENSG00000004468	88.3343	1.39038	0.281241	4.94371	7.66488e-07	1.20354e-05	CD38	952	1.98944e-05	52	44	50	91	131	162
1021	ENSG00000100097	2684.66	-1.05421	0.213416	-4.93971	7.82401e-07	1.22732e-05	LGALS1	3956	2.02876e-05	3454	3939	3479	2549	1425	1261
1022	ENSG00000110619	815.624	-0.964838	0.19536	-4.93878	7.86128e-07	1.23196e-05	CARS	833	2.03643e-05	838	953	1446	602	506	549
1023	ENSG00000109323	121.653	1.14041	0.230918	4.93858	7.8694e-07	1.23203e-05	MANBA	4126	2.03654e-05	91	70	67	185	151	166
1024	ENSG00000053770	564.016	0.78817	0.159637	4.93727	7.92234e-07	1.2391e-05	AP5M1	55745	2.04824e-05	471	352	417	695	768	680
1025	ENSG00000069020	217.225	0.928018	0.188001	4.93623	7.96468e-07	1.24451e-05	MAST4	375449	2.05717e-05	162	161	125	283	299	273
1026	ENSG00000071564	378.507	-0.962442	0.195059	-4.93411	8.05188e-07	1.25691e-05	TCF3	6929	2.07767e-05	534	580	387	275	283	213
1027	ENSG00000133131	1081.35	0.654891	0.132837	4.93003	8.22178e-07	1.28218e-05	MORC4	79710	2.11944e-05	863	854	803	1232	1417	1319
1028	ENSG00000142733	177.641	-1.01865	0.206719	-4.92769	8.32061e-07	1.29633e-05	MAP3K6	9064	2.14283e-05	275	219	220	132	119	101
1029	ENSG00000185527	14.2766	3.79729	0.77065	4.92738	8.33382e-07	1.29713e-05	PDE6G	5148	2.14415e-05	3	2	1	23	23	34
1030	ENSG00000170373	227.249	1.37658	0.279511	4.92495	8.43808e-07	1.31208e-05	CST1	1469	2.16887e-05	109	80	190	252	432	300
1031	ENSG00000001497	884.12	-0.712804	0.14479	-4.92302	8.52199e-07	1.32384e-05	LAS1L	81887	2.18831e-05	1125	1141	1028	741	679	590
1032	ENSG00000123374	239.411	-0.998683	0.203013	-4.91931	8.68508e-07	1.34787e-05	CDK2	1017	2.22803e-05	320	375	262	137	186	156
1033	ENSG00000071991	131.942	-1.52151	0.309508	-4.9159	8.83761e-07	1.37021e-05	CDH19	28513	2.26496e-05	186	193	209	114	52	38
1034	ENSG00000175600	16.5141	3.7632	0.765697	4.91474	8.89e-07	1.377e-05	SUGCT	79783	2.27618e-05	1	3	3	52	15	26
1035	ENSG00000138778	119.621	-1.3981	0.284712	-4.91058	9.08087e-07	1.40521e-05	CENPE	1062	2.32281e-05	167	180	173	44	103	51
1036	ENSG00000151135	310.321	0.948	0.193099	4.90941	9.13499e-07	1.41222e-05	TMEM263	90488	2.3344e-05	219	243	174	477	344	405
1037	ENSG00000171303	85.809	-1.32641	0.270276	-4.9076	9.21991e-07	1.42397e-05	KCNK3	3777	2.35382e-05	109	145	114	53	56	38
1038	ENSG00000164543	233.529	0.860512	0.175354	4.90727	9.23511e-07	1.42495e-05	STK17A	9263	2.35544e-05	162	165	171	323	288	292
1039	ENSG00000141510	720.495	-0.811958	0.165502	-4.90603	9.29372e-07	1.43261e-05	TP53	7157	2.3681e-05	782	869	1104	539	551	479
1040	ENSG00000125977	2606.93	-0.799651	0.163043	-4.90455	9.36428e-07	1.4421e-05	EIF2S2	8894	2.38379e-05	2861	2993	4081	1990	2044	1672
1041	ENSG00000101266	1950.72	-0.696123	0.142015	-4.90177	9.49786e-07	1.46127e-05	CSNK2A1	1457	2.41547e-05	2398	2553	2287	1638	1564	1264
1042	ENSG00000113810	778.663	-0.993997	0.2028	-4.90137	9.51724e-07	1.46284e-05	SMC4	10051	2.41808e-05	1109	1038	962	379	716	467
1043	ENSG00000135404	5010.86	0.704851	0.143848	4.89996	9.5856e-07	1.47194e-05	CD63	967	2.43311e-05	3987	3212	4233	5616	6484	6534
1044	ENSG00000091138	14.5938	4.42366	0.902835	4.89975	9.59596e-07	1.47212e-05	SLC26A3	1811	2.43341e-05	0	2	2	14	30	40
1045	ENSG00000213853	355.371	-0.992509	0.202659	-4.89744	9.70908e-07	1.48804e-05	EMP2	2013	2.45973e-05	520	472	427	179	309	225
1046	ENSG00000134291	778.735	-0.759239	0.155046	-4.89686	9.73782e-07	1.49102e-05	TMEM106C	79022	2.46466e-05	1056	1001	879	508	661	567
1047	ENSG00000257093	286.323	0.887141	0.181317	4.89276	9.94331e-07	1.52103e-05	KIAA1147	57189	2.51426e-05	214	217	172	336	360	419
1048	ENSG00000244306	164.238	0.992607	0.202917	4.89169	9.99755e-07	1.52787e-05	LINC01296	642477	2.52557e-05	106	120	104	213	197	246
1049	ENSG00000106992	68.9782	1.42142	0.290672	4.89011	1.0078e-06	1.5387e-05	AK1	203	2.54347e-05	40	34	38	125	88	88
1050	ENSG00000083168	374.271	-0.879068	0.179779	-4.88971	1.00983e-06	1.54032e-05	KAT6A	7994	2.54615e-05	519	469	467	318	258	214
1051	ENSG00000121211	45.3797	-1.95826	0.400575	-4.88861	1.01548e-06	1.54747e-05	MND1	84057	2.55797e-05	71	84	61	15	32	9
1052	ENSG00000067596	635.795	-0.756948	0.154958	-4.88487	1.03496e-06	1.57566e-05	DHX8	1659	2.60456e-05	861	792	743	544	442	432
1053	ENSG00000162298	612.803	0.818519	0.167659	4.88205	1.04989e-06	1.59687e-05	SYVN1	102465449	2.63962e-05	473	451	406	642	791	914
1054	ENSG00000109113	900.862	-0.723998	0.148321	-4.88128	1.05398e-06	1.60157e-05	RAB34	100861437	2.6474e-05	1081	1224	1062	775	623	640
1055	ENSG00000196367	713.979	-0.740969	0.152014	-4.87434	1.09172e-06	1.65735e-05	TRRAP	8295	2.7396e-05	966	934	779	586	518	500
1056	ENSG00000245532	508.292	2.62981	0.539606	4.87356	1.09603e-06	1.66231e-05	NEAT1	693197	2.7478e-05	136	155	134	400	726	1500
1057	ENSG00000062822	262.683	-1.02801	0.211044	-4.87106	1.11001e-06	1.68192e-05	POLD1	5424	2.78022e-05	346	449	262	172	165	181
1058	ENSG00000138944	40.3547	-2.01254	0.413238	-4.87016	1.11508e-06	1.688e-05	KIAA1644	85352	2.79026e-05	88	70	36	16	16	16
1059	ENSG00000223784	109.221	1.1883	0.244029	4.86948	1.11891e-06	1.6922e-05	RP11-554I8.2	NA	2.79721e-05	80	67	52	135	155	166
1060	ENSG00000164151	358.821	-0.777188	0.159685	-4.86699	1.13308e-06	1.71203e-05	ICE1	23379	2.82998e-05	483	453	424	255	284	255
1061	ENSG00000000003	507.137	0.722424	0.148471	4.86575	1.14024e-06	1.71977e-05	TSPAN6	7105	2.84277e-05	389	350	409	614	661	620
1062	ENSG00000101868	281.795	-0.939409	0.193066	-4.86573	1.14035e-06	1.71977e-05	POLA1	5422	2.84277e-05	408	405	298	167	216	197
1063	ENSG00000168955	2410.43	1.16178	0.238854	4.86398	1.15049e-06	1.73342e-05	TM4SF20	79853	2.86534e-05	1607	1036	1824	2118	4526	3352
1064	ENSG00000143575	1234.04	-0.70443	0.144917	-4.8609	1.16851e-06	1.75892e-05	HAX1	10456	2.90749e-05	1383	1439	1766	891	942	983
1065	ENSG00000129116	1053.25	0.8233	0.169398	4.86015	1.17295e-06	1.76394e-05	PALLD	23022	2.91579e-05	805	771	706	1689	1203	1146
1066	ENSG00000127586	102.431	-1.43939	0.296297	-4.85792	1.18625e-06	1.78227e-05	CHTF18	63922	2.94609e-05	166	189	94	47	70	49
1067	ENSG00000130669	1381.9	-0.750182	0.154562	-4.85358	1.21251e-06	1.82002e-05	PAK4	10298	3.00848e-05	1773	1898	1529	1201	987	903
1068	ENSG00000113621	625.231	0.774133	0.159598	4.85052	1.23135e-06	1.84657e-05	TXNDC15	79770	3.05238e-05	459	440	485	654	834	879
1069	ENSG00000171792	397.483	-0.796267	0.164254	-4.84777	1.24859e-06	1.87067e-05	RHNO1	83695	3.09221e-05	478	491	544	273	333	266
1070	ENSG00000197580	26.6267	2.41134	0.497697	4.84499	1.26618e-06	1.89525e-05	BCO2	83875	3.13284e-05	6	8	11	26	59	49
1071	ENSG00000111790	218.545	-0.911845	0.188316	-4.84211	1.28467e-06	1.92112e-05	FGFR1OP2	26127	3.17561e-05	278	257	322	139	164	152
1072	ENSG00000066279	240.547	-1.26944	0.262227	-4.841	1.29187e-06	1.93009e-05	ASPM	259266	3.19043e-05	435	335	249	95	199	129
1073	ENSG00000264717	83.6195	1.58326	0.327338	4.83676	1.31973e-06	1.96988e-05	CH17-360D5.1	105379861	3.25621e-05	42	60	24	123	91	162
1074	ENSG00000188549	74.8911	1.58518	0.327819	4.83555	1.32779e-06	1.97931e-05	C15orf52	388115	3.2718e-05	29	45	38	155	70	112
1075	ENSG00000104953	51.4209	1.64042	0.339249	4.83544	1.32852e-06	1.97931e-05	TLE6	79816	3.2718e-05	28	24	24	67	64	103
1076	ENSG00000183495	613.749	-0.778145	0.160989	-4.83352	1.34141e-06	1.99666e-05	EP400	57634	3.30047e-05	740	884	702	513	430	413
1077	ENSG00000132481	447.41	-0.778078	0.161029	-4.83192	1.35226e-06	2.01094e-05	TRIM47	91107	3.32407e-05	517	576	603	301	374	314
1078	ENSG00000148677	34.1771	2.91927	0.604515	4.82911	1.37143e-06	2.03739e-05	ANKRD1	27063	3.36781e-05	9	9	6	127	17	37
1079	ENSG00000136295	853.469	0.807925	0.167309	4.82894	1.37259e-06	2.03739e-05	TTYH3	80727	3.36781e-05	583	715	564	1301	969	989
1080	ENSG00000170786	15.6119	-3.3855	0.701361	-4.82704	1.38577e-06	2.05505e-05	SDR16C5	195814	3.39699e-05	33	20	33	4	2	2
1081	ENSG00000135596	78.5722	1.30495	0.270377	4.8264	1.39022e-06	2.05974e-05	MICAL1	64780	3.40475e-05	43	53	40	119	94	122
1082	ENSG00000065427	2778.98	-0.652996	0.135309	-4.82598	1.39319e-06	2.06223e-05	KARS	3735	3.40886e-05	3276	3246	3671	2337	2242	1902
1083	ENSG00000073792	97.6744	-1.32934	0.275466	-4.82578	1.39459e-06	2.06239e-05	IGF2BP2	10644	3.40913e-05	128	130	161	74	56	37
1084	ENSG00000162643	15.2154	5.53819	1.14857	4.82182	1.42253e-06	2.10177e-05	WDR63	126820	3.47422e-05	1	0	1	45	17	28
1085	ENSG00000198546	135.212	-1.06738	0.22151	-4.81865	1.44535e-06	2.13352e-05	ZNF511	118472	3.52671e-05	171	202	176	72	93	97
1086	ENSG00000249859	81.9532	1.41723	0.294202	4.81721	1.45579e-06	2.14696e-05	PVT1	100302185	3.54891e-05	36	46	52	90	111	157
1087	ENSG00000123836	247.164	0.947969	0.196807	4.81674	1.4592e-06	2.15e-05	PFKFB2	5208	3.55395e-05	162	178	166	296	278	403
1088	ENSG00000163545	599.728	0.794582	0.164992	4.81588	1.46549e-06	2.1565e-05	NUAK2	81788	3.5647e-05	419	506	391	873	697	712
1089	ENSG00000184500	348.815	1.15973	0.240819	4.81577	1.4663e-06	2.1565e-05	PROS1	5627	3.5647e-05	209	183	255	311	664	470
1090	ENSG00000108439	461.305	0.82349	0.171021	4.81515	1.47086e-06	2.16123e-05	PNPO	55163	3.5725e-05	323	336	340	715	525	528
1091	ENSG00000183255	1310.3	0.628926	0.130623	4.81483	1.47323e-06	2.16271e-05	PTTG1IP	754	3.57496e-05	1086	986	1015	1573	1702	1499
1092	ENSG00000147862	235.152	-0.875091	0.181794	-4.81364	1.48207e-06	2.1737e-05	NFIB	4781	3.59313e-05	288	340	285	179	157	162
1093	ENSG00000137491	64.7612	1.87644	0.38997	4.81176	1.49607e-06	2.19223e-05	SLCO2B1	11309	3.62375e-05	29	15	39	54	112	139
1094	ENSG00000281649	252.631	0.854767	0.177692	4.81038	1.50643e-06	2.20539e-05	EBLN3P	100506710	3.6455e-05	203	177	158	318	327	331
1095	ENSG00000187555	1400.64	-0.716547	0.148972	-4.80994	1.50978e-06	2.20827e-05	USP7	7874	3.65027e-05	1863	1752	1609	1141	1153	885
1096	ENSG00000168374	1834.04	0.606723	0.126175	4.80856	1.52018e-06	2.21986e-05	ARF4	378	3.66943e-05	1507	1362	1493	2258	2296	2088
1097	ENSG00000170860	722.713	-0.771557	0.160456	-4.80853	1.52047e-06	2.21986e-05	LSM3	27258	3.66943e-05	943	911	880	503	643	456
1098	ENSG00000130723	859.154	-0.881239	0.183291	-4.80786	1.52557e-06	2.22527e-05	PRRC2B	84726	3.67837e-05	1252	1119	971	776	534	504
1099	ENSG00000121892	657.345	-0.688947	0.143309	-4.80742	1.52888e-06	2.22807e-05	PDS5A	23244	3.683e-05	827	869	738	521	504	485
1100	ENSG00000244503	20.344	3.00981	0.626661	4.80293	1.56358e-06	2.27658e-05	RP11-278L15.6	NA	3.76317e-05	4	8	2	26	23	59
1101	ENSG00000173209	58.2852	2.19278	0.456578	4.80264	1.56589e-06	2.27786e-05	AHSA2	130872	3.7653e-05	19	25	20	39	68	180
1102	ENSG00000069011	526.372	-0.735418	0.153138	-4.80232	1.56841e-06	2.27946e-05	PITX1	5307	3.76794e-05	628	651	694	411	428	346
1103	ENSG00000172292	159.672	-1.08291	0.225533	-4.80158	1.5742e-06	2.28499e-05	CERS6	253782	3.77708e-05	244	231	175	117	108	82
1104	ENSG00000115419	202.817	0.922998	0.192232	4.80147	1.57507e-06	2.28499e-05	GLS	2744	3.77708e-05	156	138	125	246	255	296
1105	ENSG00000101849	604.264	-0.909822	0.189532	-4.80035	1.58387e-06	2.29568e-05	TBL1X	6907	3.79476e-05	903	811	652	406	520	334
1106	ENSG00000076248	460.694	-0.919898	0.191675	-4.79927	1.59247e-06	2.30605e-05	UNG	7374	3.8119e-05	613	733	462	284	362	309
1107	ENSG00000125726	19.2273	3.04392	0.634375	4.79831	1.60013e-06	2.31506e-05	CD70	970	3.82679e-05	4	6	2	18	32	53
1108	ENSG00000005238	170.59	0.960554	0.200648	4.78725	1.6908e-06	2.44402e-05	FAM214B	80256	4.03997e-05	124	126	97	230	216	231
1109	ENSG00000115561	852.888	0.68537	0.143268	4.78382	1.71994e-06	2.4839e-05	CHMP3	51652	4.10589e-05	708	595	659	1081	1114	960
1110	ENSG00000105223	1980.7	0.592648	0.12396	4.78097	1.74454e-06	2.51717e-05	PLD3	23646	4.16087e-05	1558	1526	1654	2485	2250	2411
1111	ENSG00000111581	474.111	-0.823936	0.172386	-4.7796	1.75643e-06	2.53204e-05	NUP107	57122	4.18545e-05	650	575	592	295	418	314
1112	ENSG00000013288	260.571	0.821885	0.172018	4.7779	1.77134e-06	2.55125e-05	MAN2B2	23324	4.2172e-05	204	180	180	348	314	337
1113	ENSG00000132465	15.6753	3.28116	0.687076	4.77554	1.79226e-06	2.57905e-05	JCHAIN	3512	4.26316e-05	2	1	6	31	31	24
1114	ENSG00000283498	415.345	-1.04224	0.21827	-4.775	1.79709e-06	2.58368e-05	MIR1244-2	100422885	4.27082e-05	569	536	572	261	374	180
1115	ENSG00000168918	21.9346	2.62295	0.549516	4.7732	1.81322e-06	2.60454e-05	INPP5D	3635	4.30529e-05	5	5	8	56	33	25
1116	ENSG00000070526	668.96	0.935444	0.195991	4.77288	1.81607e-06	2.60556e-05	ST6GALNAC1	55808	4.30698e-05	511	445	422	1150	825	661
1117	ENSG00000104472	339.817	-0.820628	0.17194	-4.77276	1.81719e-06	2.60556e-05	CHRAC1	54108	4.30698e-05	401	497	404	243	268	226
1118	ENSG00000150753	4368.47	-0.55747	0.116829	-4.77169	1.82682e-06	2.61703e-05	CCT5	22948	4.32595e-05	5311	5318	4978	3469	3665	3471
1119	ENSG00000153721	112.154	1.17994	0.247376	4.76981	1.844e-06	2.63927e-05	CNKSR3	154043	4.36271e-05	75	77	53	180	129	158
1120	ENSG00000051825	239.507	-0.893784	0.187433	-4.76855	1.85555e-06	2.65344e-05	MPHOSPH9	10198	4.38613e-05	319	325	290	145	198	160
1121	ENSG00000049130	176.995	1.16847	0.245136	4.76662	1.87342e-06	2.6766e-05	KITLG	4254	4.42442e-05	125	96	106	338	199	198
1122	ENSG00000113569	418.439	-0.905518	0.190032	-4.76508	1.8878e-06	2.69474e-05	NUP155	9631	4.45441e-05	609	595	433	313	324	237
1123	ENSG00000143924	523.322	-0.707237	0.148561	-4.76057	1.93046e-06	2.75318e-05	EML4	27436	4.551e-05	673	648	626	394	434	365
1124	ENSG00000111669	13353.4	-0.626833	0.13169	-4.75992	1.93665e-06	2.75955e-05	TPI1	7167	4.56154e-05	17353	16126	15149	11378	10877	9237
1125	ENSG00000118508	349.324	-0.748926	0.15736	-4.75932	1.94245e-06	2.76536e-05	RAB32	10981	4.57113e-05	463	432	418	271	256	255
1126	ENSG00000125740	242.457	2.77229	0.582566	4.75876	1.94783e-06	2.77055e-05	FOSB	2354	4.57972e-05	82	26	77	241	459	570
1127	ENSG00000141741	607.318	0.84057	0.176657	4.7582	1.95328e-06	2.77585e-05	MIEN1	84299	4.58847e-05	428	390	487	656	726	956
1128	ENSG00000239305	180.9	0.943068	0.198268	4.75653	1.96944e-06	2.79633e-05	RNF103	7844	4.62232e-05	126	106	140	257	228	230
1129	ENSG00000181163	13542.5	-0.605145	0.127232	-4.75625	1.97219e-06	2.79775e-05	NPM1	4869	4.62467e-05	15917	16035	17072	10500	11977	9752
1130	ENSG00000179604	892.139	-0.672645	0.141452	-4.75529	1.9816e-06	2.80861e-05	CDC42EP4	23580	4.64263e-05	1113	1124	1053	706	750	608
1131	ENSG00000260711	22.9563	2.45908	0.517241	4.75423	1.99207e-06	2.82095e-05	RP11-747H7.3	NA	4.66302e-05	7	8	6	24	47	46
1132	ENSG00000172534	1081.88	-0.871222	0.183432	-4.74955	2.03866e-06	2.88438e-05	HCFC1	3054	4.76787e-05	1513	1673	1011	810	794	691
1133	ENSG00000160193	202.693	-0.967995	0.203924	-4.74684	2.0662e-06	2.92077e-05	WDR4	10785	4.82803e-05	297	282	225	159	135	118
1134	ENSG00000105246	15.347	3.27817	0.690882	4.7449	2.08606e-06	2.94624e-05	EBI3	10148	4.87014e-05	4	4	1	36	19	29
1135	ENSG00000108424	3967.28	-0.730766	0.154044	-4.74387	2.09677e-06	2.95876e-05	KPNB1	3837	4.89082e-05	5008	5446	4399	3256	3270	2424
1136	ENSG00000250565	108.001	-1.122	0.23658	-4.74258	2.11012e-06	2.97497e-05	ATP6V1E2	90423	4.91761e-05	156	150	138	75	74	55
1137	ENSG00000086475	606.748	-0.655163	0.138165	-4.74189	2.11728e-06	2.98245e-05	SEPHS1	22929	4.92998e-05	753	759	715	476	470	467
1138	ENSG00000100410	391.389	-0.755484	0.159551	-4.73507	2.18975e-06	3.08181e-05	PHF5A	84844	5.09423e-05	435	525	515	296	282	295
1139	ENSG00000100393	652.231	-0.750229	0.158542	-4.73205	2.22267e-06	3.12539e-05	EP300	100302237	5.16626e-05	862	848	744	553	413	493
1140	ENSG00000134809	638.376	-0.688298	0.14555	-4.72894	2.2569e-06	3.17075e-05	TIMM10	26519	5.24124e-05	786	781	796	432	514	522
1141	ENSG00000146263	57.8488	-1.48074	0.313148	-4.72858	2.261e-06	3.17373e-05	MMS22L	253714	5.24616e-05	91	88	76	25	40	27
1142	ENSG00000117983	44969.4	0.798198	0.168858	4.72703	2.27832e-06	3.19519e-05	MUC5B	727897	5.28165e-05	41098	26800	30613	49329	63572	58405
1143	ENSG00000104140	1282.26	-0.692375	0.146477	-4.72685	2.28029e-06	3.19519e-05	RHOV	171177	5.28165e-05	1505	1506	1742	1112	962	867
1144	ENSG00000100105	312.95	-0.849639	0.179768	-4.72632	2.28628e-06	3.19809e-05	PATZ1	23598	5.28644e-05	335	433	440	245	213	212
1145	ENSG00000156873	147.733	0.991599	0.209804	4.72631	2.28635e-06	3.19809e-05	PHKG2	5261	5.28644e-05	109	97	90	197	176	217
1146	ENSG00000257167	43.0078	-1.96287	0.415351	-4.7258	2.29215e-06	3.20341e-05	TMPO-AS1	100128191	5.29523e-05	77	66	63	13	32	8
1147	ENSG00000132470	3167	0.839276	0.17761	4.72539	2.2968e-06	3.20523e-05	ITGB4	3691	5.29823e-05	2414	2160	2239	5371	3393	3426
1148	ENSG00000259884	24.0324	2.78999	0.590433	4.72533	2.29745e-06	3.20523e-05	RP11-1100L3.8	NA	5.29823e-05	7	7	4	15	47	65
1149	ENSG00000173846	65.9624	1.6323	0.345495	4.72453	2.30652e-06	3.21508e-05	PLK3	1263	5.31451e-05	21	36	40	88	71	140
1150	ENSG00000107263	405.929	-0.795843	0.1685	-4.7231	2.32279e-06	3.23494e-05	RAPGEF1	2889	5.34735e-05	554	552	439	307	317	266
1151	ENSG00000236603	533.557	-0.719144	0.152314	-4.72146	2.34155e-06	3.25824e-05	RANP1	NA	5.38586e-05	611	748	632	396	417	397
1152	ENSG00000272196	141.313	1.37393	0.291025	4.72099	2.34696e-06	3.26292e-05	HIST2H2AA4	723790	5.3936e-05	56	75	106	253	125	234
1153	ENSG00000203812	140.634	1.37296	0.290846	4.72059	2.35164e-06	3.2666e-05	HIST2H2AA3	8337	5.39968e-05	56	75	105	251	124	234
1154	ENSG00000164946	22.8897	3.22743	0.684017	4.71834	2.37776e-06	3.29899e-05	FREM1	158326	5.45323e-05	9	0	4	14	54	56
1155	ENSG00000197766	333.465	1.12416	0.238258	4.71823	2.37908e-06	3.29899e-05	CFD	1675	5.45323e-05	212	204	213	280	468	623
1156	ENSG00000115641	652.596	0.814596	0.17273	4.71601	2.40512e-06	3.33015e-05	FHL2	2274	5.50474e-05	448	505	467	1031	699	765
1157	ENSG00000204866	12.4762	4.20776	0.892237	4.71596	2.40571e-06	3.33015e-05	IGFL2	147920	5.50474e-05	2	1	1	19	29	24
1158	ENSG00000125686	470.018	-0.736862	0.156332	-4.71343	2.43581e-06	3.36891e-05	MED1	5469	5.56879e-05	613	617	533	362	378	318
1159	ENSG00000067064	951.38	0.718172	0.152392	4.71267	2.44494e-06	3.37862e-05	IDI1	3422	5.58485e-05	779	762	617	1322	1134	1094
1160	ENSG00000007255	180.867	1.10787	0.235114	4.71204	2.45244e-06	3.38606e-05	TRAPPC6A	79090	5.59714e-05	100	88	156	264	210	267
1161	ENSG00000154065	96.3918	1.20544	0.255886	4.71084	2.467e-06	3.40322e-05	ANKRD29	147463	5.62552e-05	60	64	51	160	108	135
1162	ENSG00000085117	100.584	1.38755	0.294777	4.70712	2.51237e-06	3.46284e-05	CD82	3732	5.72406e-05	69	34	64	183	145	109
1163	ENSG00000089597	5434.37	-0.634216	0.13476	-4.70626	2.52302e-06	3.47452e-05	GANAB	23193	5.74337e-05	7268	6443	6119	4630	4350	3797
1164	ENSG00000167105	224.56	0.933075	0.198325	4.70478	2.54134e-06	3.49675e-05	TMEM92	162461	5.78012e-05	187	135	140	264	324	297
1165	ENSG00000171865	259.744	-0.960116	0.204156	-4.70287	2.56534e-06	3.52674e-05	RNASEH1	246243	5.8297e-05	354	410	265	201	167	161
1166	ENSG00000188157	3577.91	0.867825	0.184567	4.70196	2.57677e-06	3.53942e-05	AGRN	375790	5.85065e-05	2938	2812	1849	5418	3879	4572
1167	ENSG00000253729	2598.48	-0.761553	0.16201	-4.70065	2.5934e-06	3.5592e-05	PRKDC	5591	5.88335e-05	3597	3648	2561	2089	1982	1714
1168	ENSG00000170089	525.246	-0.711554	0.151412	-4.69945	2.60868e-06	3.57711e-05	RP11-423H2.1	NA	5.91295e-05	670	697	589	369	416	410
1169	ENSG00000089199	268.637	0.881615	0.187625	4.6988	2.61695e-06	3.58537e-05	CHGB	1114	5.92661e-05	203	158	207	345	307	392
1170	ENSG00000102003	40.9339	-1.71398	0.364801	-4.69839	2.62217e-06	3.58946e-05	SYP	6855	5.93337e-05	54	58	76	23	17	17
1171	ENSG00000149311	137.393	1.12081	0.238562	4.69821	2.62447e-06	3.58954e-05	ATM	472	5.9335e-05	88	94	77	164	158	243
1172	ENSG00000111667	1511.19	-0.691616	0.147229	-4.69755	2.63306e-06	3.59821e-05	USP5	8078	5.94784e-05	2011	1981	1607	1262	1169	1036
1173	ENSG00000117593	829.369	-0.731544	0.155749	-4.69695	2.64072e-06	3.60561e-05	DARS2	55157	5.96006e-05	1056	1146	903	563	705	603
1174	ENSG00000067560	4583.13	-0.631685	0.134575	-4.69391	2.68032e-06	3.65655e-05	RHOA	387	6.04427e-05	5865	5597	5250	3902	3771	3114
1175	ENSG00000007306	140.559	4.74037	1.00995	4.69366	2.68354e-06	3.65784e-05	CEACAM7	1087	6.0464e-05	16	2	12	66	325	422
1176	ENSG00000159217	603.271	-0.720696	0.153614	-4.69161	2.71069e-06	3.6917e-05	IGF2BP1	10642	6.10237e-05	788	791	673	496	465	406
1177	ENSG00000119938	208.921	1.0834	0.230973	4.69059	2.72425e-06	3.70701e-05	PPP1R3C	5507	6.12768e-05	119	107	177	343	275	233
1178	ENSG00000173230	1013.39	0.723617	0.15437	4.68754	2.76504e-06	3.75933e-05	GOLGB1	2804	6.21416e-05	826	617	850	1271	1268	1248
1179	ENSG00000116560	2130.2	-0.660805	0.140979	-4.68726	2.7688e-06	3.76125e-05	SFPQ	6421	6.21734e-05	2634	2823	2372	1495	1866	1591
1180	ENSG00000033100	347.641	0.883296	0.188483	4.68634	2.78135e-06	3.7751e-05	CHPF2	768213	6.24023e-05	275	264	194	524	404	425
1181	ENSG00000119402	484.99	0.765818	0.163424	4.68607	2.78498e-06	3.77682e-05	FBXW2	26190	6.24308e-05	417	357	303	586	634	613
1182	ENSG00000166848	342.67	0.777264	0.165984	4.68278	2.8301e-06	3.83477e-05	TERF2IP	54386	6.33886e-05	252	225	281	438	404	457
1183	ENSG00000189091	2206.08	-0.76257	0.162912	-4.68087	2.8566e-06	3.86739e-05	SF3B3	23450	6.39279e-05	3102	2963	2263	1820	1714	1375
1184	ENSG00000107625	334.185	-0.731658	0.156318	-4.68058	2.8606e-06	3.86955e-05	DDX50	79009	6.39635e-05	410	425	417	254	249	251
1185	ENSG00000141556	571.317	-0.85009	0.181633	-4.68026	2.86504e-06	3.87228e-05	TBCD	6904	6.40087e-05	771	855	579	469	395	359
1186	ENSG00000105852	429.259	1.12293	0.240053	4.67785	2.899e-06	3.91321e-05	PON3	5446	6.46853e-05	275	212	324	366	640	759
1187	ENSG00000126261	1578.08	-0.616503	0.131794	-4.67776	2.90021e-06	3.91321e-05	UBA2	10054	6.46853e-05	1920	1905	1905	1108	1311	1319
1188	ENSG00000184787	365.421	0.904574	0.193533	4.674	2.95396e-06	3.98237e-05	UBE2G2	7327	6.58285e-05	276	297	190	461	430	539
1189	ENSG00000197530	91.4562	1.26605	0.27109	4.67022	3.00876e-06	4.05285e-05	MIB2	142678	6.69935e-05	62	48	51	127	99	162
1190	ENSG00000247903	66.3499	1.32604	0.284032	4.66864	3.03196e-06	4.08067e-05	RP11-421F16.3	NA	6.74534e-05	37	44	32	102	88	94
1191	ENSG00000176407	666.785	-0.697967	0.149673	-4.66327	3.11217e-06	4.1851e-05	KCMF1	56888	6.91796e-05	789	801	885	510	565	451
1192	ENSG00000267106	30.4868	1.94475	0.417061	4.66299	3.11647e-06	4.18737e-05	ZNF561-AS1	284385	6.92172e-05	11	13	14	58	40	47
1193	ENSG00000014641	2503.61	0.609736	0.130801	4.66154	3.13847e-06	4.21339e-05	MDH1	4190	6.96473e-05	2036	1891	2019	2839	2860	3376
1194	ENSG00000006756	472.723	0.747132	0.160355	4.65923	3.17392e-06	4.25741e-05	ARSD	414	7.03749e-05	370	302	387	550	625	603
1195	ENSG00000079156	31.7748	-1.95753	0.420473	-4.65556	3.23107e-06	4.33045e-05	OSBPL6	114880	7.15823e-05	53	37	62	11	14	14
1196	ENSG00000138074	590.132	-0.731053	0.157045	-4.65504	3.23913e-06	4.33762e-05	SLC5A6	8884	7.17007e-05	783	808	619	460	437	434
1197	ENSG00000140950	360.424	0.796796	0.171295	4.65159	3.29382e-06	4.40717e-05	TLDC1	57707	7.28504e-05	272	282	235	519	404	450
1198	ENSG00000026297	85.1859	1.17413	0.252456	4.65085	3.30573e-06	4.41803e-05	RNASET2	8635	7.303e-05	55	47	54	107	122	125
1199	ENSG00000168497	152.987	1.06767	0.229578	4.65056	3.31029e-06	4.41803e-05	SDPR	8436	7.303e-05	101	97	99	259	157	206
1200	ENSG00000162736	585.389	0.679881	0.146194	4.65055	3.31044e-06	4.41803e-05	NCSTN	23385	7.303e-05	450	478	422	677	708	778
1201	ENSG00000204356	722.584	-0.641269	0.137896	-4.6504	3.31297e-06	4.41803e-05	NELFE	100302242	7.303e-05	826	886	930	585	563	545
1202	ENSG00000102384	96.9185	-1.34111	0.288399	-4.6502	3.31616e-06	4.41861e-05	CENPI	2491	7.30395e-05	145	175	97	48	71	46
1203	ENSG00000131094	112.969	-1.18816	0.255818	-4.64455	3.40817e-06	4.53743e-05	C1QL1	10882	7.50036e-05	174	172	125	84	72	51
1204	ENSG00000119801	297.098	0.947397	0.204053	4.64289	3.43573e-06	4.57032e-05	YPEL5	51646	7.55473e-05	189	158	262	438	378	358
1205	ENSG00000197603	139.022	1.10372	0.237762	4.64213	3.44831e-06	4.58325e-05	C5orf42	65250	7.57609e-05	107	83	74	159	178	233
1206	ENSG00000105866	23.3177	-2.45993	0.530127	-4.64026	3.47969e-06	4.62112e-05	SP4	6671	7.63871e-05	35	57	27	6	5	10
1207	ENSG00000160949	172.063	-1.04013	0.22434	-4.63641	3.54508e-06	4.70406e-05	TONSL	4796	7.7758e-05	214	287	193	132	108	97
1208	ENSG00000260260	236.795	-0.920648	0.198682	-4.63378	3.59053e-06	4.76043e-05	SNHG19	100507303	7.86897e-05	290	292	348	132	162	197
1209	ENSG00000196358	138.067	-0.96173	0.207772	-4.62877	3.67835e-06	4.87283e-05	NTNG2	84628	8.05478e-05	171	194	182	92	92	96
1210	ENSG00000075131	146.48	-1.17847	0.254811	-4.62486	3.74847e-06	4.96161e-05	TIPIN	54962	8.20153e-05	175	260	175	92	113	65
1211	ENSG00000129103	1580.31	0.594565	0.128569	4.62447	3.75558e-06	4.96692e-05	SUMF2	25870	8.2103e-05	1338	1185	1254	1792	1919	1993
1212	ENSG00000154153	148.144	0.98519	0.213093	4.62328	3.77717e-06	4.99135e-05	FAM134B	54463	8.25069e-05	100	82	116	207	197	186
1213	ENSG00000008394	5153.62	0.740592	0.160298	4.6201	3.83564e-06	5.06444e-05	MGST1	4257	8.37151e-05	3777	3406	4395	5176	7322	6846
1214	ENSG00000120334	68.1556	-1.31663	0.285119	-4.61783	3.87769e-06	5.11574e-05	CENPL	91687	8.45631e-05	87	112	93	37	46	35
1215	ENSG00000174744	743.156	-0.642791	0.139264	-4.61561	3.91939e-06	5.1665e-05	BRMS1	25855	8.54021e-05	925	917	876	613	599	529
1216	ENSG00000152240	187.734	-0.929258	0.201415	-4.61365	3.95658e-06	5.21123e-05	HAUS1	115106	8.61415e-05	226	261	252	106	149	132
1217	ENSG00000136492	74.7146	-1.496	0.324362	-4.61212	3.98579e-06	5.24539e-05	BRIP1	83990	8.67062e-05	106	138	86	38	56	24
1218	ENSG00000106290	356.878	-0.809638	0.175568	-4.61154	3.99699e-06	5.25581e-05	TAF6	6878	8.68785e-05	444	515	404	242	299	238
1219	ENSG00000165501	148.561	-1.034	0.224325	-4.60938	4.03863e-06	5.30621e-05	LRR1	122769	8.77115e-05	220	194	185	103	115	74
1220	ENSG00000134962	21.2336	2.9379	0.637688	4.60712	4.08281e-06	5.35986e-05	KLB	152831	8.85984e-05	2	4	9	65	20	28
1221	ENSG00000140396	276.301	-0.82209	0.178465	-4.60645	4.09594e-06	5.37269e-05	NCOA2	10499	8.88105e-05	401	340	318	203	214	182
1222	ENSG00000073060	2397.88	0.716688	0.155616	4.60549	4.11492e-06	5.39317e-05	SCARB1	949	8.9149e-05	1959	1954	1529	3459	2846	2640
1223	ENSG00000161509	19.8625	2.84884	0.618682	4.60469	4.13088e-06	5.40966e-05	GRIN2C	2905	8.94216e-05	4	6	5	22	22	60
1224	ENSG00000077942	885.396	0.934309	0.202931	4.60407	4.1432e-06	5.42137e-05	FBLN1	2192	8.96151e-05	674	585	566	767	1336	1385
1225	ENSG00000166471	166.02	0.95664	0.208046	4.59821	4.26132e-06	5.57137e-05	TMEM41B	440026	9.20946e-05	112	128	98	190	231	237
1226	ENSG00000185721	798.328	-0.750216	0.163194	-4.59707	4.28469e-06	5.59736e-05	DRG1	4733	9.25243e-05	1007	1009	988	733	542	510
1227	ENSG00000198223	43.8209	1.77017	0.385084	4.59683	4.28957e-06	5.59917e-05	CSF2RA	1438	9.25542e-05	24	10	26	85	60	58
1228	ENSG00000154864	120.636	1.2375	0.269251	4.5961	4.30478e-06	5.61264e-05	PIEZO2	63895	9.27768e-05	97	75	43	179	154	176
1229	ENSG00000127418	245.359	-0.840653	0.18291	-4.59599	4.3069e-06	5.61264e-05	FGFRL1	53834	9.27768e-05	339	319	287	196	178	154
1230	ENSG00000145555	1203.81	-0.811306	0.176537	-4.59568	4.31348e-06	5.61664e-05	MYO10	4651	9.28429e-05	1463	1563	1575	1118	829	674
1231	ENSG00000087365	2729.59	-0.554848	0.120789	-4.59353	4.35813e-06	5.67018e-05	SF3B2	10992	9.37279e-05	3210	3212	3322	2282	2285	2067
1232	ENSG00000100299	249.028	0.930455	0.202611	4.59232	4.38348e-06	5.69852e-05	ARSA	410	9.41965e-05	178	181	155	401	257	322
1233	ENSG00000115486	596.278	0.664627	0.144763	4.59113	4.40851e-06	5.72641e-05	GGCX	2677	9.46574e-05	481	465	438	691	709	794
1234	ENSG00000213722	233.866	-0.799263	0.1741	-4.59084	4.41475e-06	5.72987e-05	DDAH2	23564	9.47147e-05	282	306	303	166	176	170
1235	ENSG00000147853	599.521	0.706446	0.15398	4.58792	4.47694e-06	5.80589e-05	AK3	50808	9.59712e-05	484	448	435	826	759	646
1236	ENSG00000137509	707.86	0.788996	0.172075	4.5852	4.53558e-06	5.87717e-05	PRCP	5547	9.71495e-05	522	474	561	709	923	1059
1237	ENSG00000116138	141.508	0.979444	0.213681	4.58367	4.56893e-06	5.9156e-05	DNAJC16	23341	9.77848e-05	94	89	103	161	204	198
1238	ENSG00000156398	105.765	1.2326	0.26906	4.58115	4.62433e-06	5.9825e-05	SFXN2	118980	9.88905e-05	62	77	49	110	153	182
1239	ENSG00000160131	323.156	0.902814	0.197253	4.57694	4.71821e-06	6.09902e-05	VMA21	203547	0.000100817	200	235	241	323	512	428
1240	ENSG00000108671	1275.79	-0.643384	0.140676	-4.57351	4.79622e-06	6.19486e-05	PSMD11	5717	0.000102401	1518	1716	1433	1018	1069	901
1241	ENSG00000132170	235.76	-0.903206	0.19752	-4.57273	4.81409e-06	6.21293e-05	PPARG	5468	0.0001027	275	292	355	135	187	170
1242	ENSG00000114405	63.5658	-1.36063	0.297571	-4.57245	4.82061e-06	6.21633e-05	C3orf14	57415	0.000102756	85	95	95	36	44	27
1243	ENSG00000165376	1646.61	2.41891	0.529121	4.57157	4.84095e-06	6.23754e-05	CLDN2	9075	0.000103106	659	419	479	1170	3941	3212
1244	ENSG00000177479	438.295	-0.700643	0.153296	-4.57054	4.86479e-06	6.26322e-05	ARIH2	10425	0.000103531	567	564	498	353	317	332
1245	ENSG00000117155	143.413	-0.949601	0.207974	-4.56596	4.97225e-06	6.39643e-05	SSX2IP	117178	0.000105733	195	185	186	97	109	87
1246	ENSG00000258314	13.5746	3.47396	0.761351	4.56289	5.04552e-06	6.48548e-05	CTD-2314B22.1	NA	0.000107205	3	2	2	20	17	38
1247	ENSG00000108846	3062.85	0.583489	0.1279	4.56207	5.0652e-06	6.50555e-05	ABCC3	8714	0.000107537	2634	2201	2520	3749	3522	3751
1248	ENSG00000260916	176.821	0.98111	0.215081	4.56159	5.07672e-06	6.51513e-05	CCPG1	693213	0.000107695	119	90	148	229	245	231
1249	ENSG00000001461	250.102	1.03106	0.226192	4.55833	5.15618e-06	6.6118e-05	NIPAL3	57185	0.000109293	178	127	188	441	288	279
1250	ENSG00000198805	889.045	0.729915	0.160239	4.55517	5.23438e-06	6.7067e-05	PNP	4860	0.000110862	699	705	603	937	1089	1302
1251	ENSG00000123983	1532.53	0.672037	0.147555	4.55449	5.25118e-06	6.72285e-05	ACSL3	2181	0.000111129	1197	1099	1250	2157	1881	1611
1252	ENSG00000133119	188.592	-0.96249	0.21136	-4.55379	5.26875e-06	6.73996e-05	RFC3	5983	0.000111411	248	279	220	110	159	115
1253	ENSG00000064726	546.614	0.705521	0.155128	4.54798	5.41629e-06	6.92317e-05	BTBD1	53339	0.00011444	439	414	394	769	656	609
1254	ENSG00000145494	1138.35	-0.578524	0.127209	-4.54781	5.42077e-06	6.92336e-05	NDUFS6	4726	0.000114443	1390	1298	1402	917	926	897
1255	ENSG00000137449	158.289	0.970979	0.213773	4.5421	5.56957e-06	7.10774e-05	CPEB2	132864	0.000117491	124	106	90	185	209	236
1256	ENSG00000133872	1389.11	0.647744	0.142707	4.53896	5.65316e-06	7.20868e-05	SARAF	51669	0.000119159	1189	951	1106	1561	1836	1692
1257	ENSG00000135919	153.919	1.06016	0.233646	4.53744	5.69403e-06	7.25502e-05	SERPINE2	5270	0.000119925	95	123	82	257	178	190
1258	ENSG00000165915	243.212	0.906142	0.199762	4.53611	5.73021e-06	7.29531e-05	SLC39A13	91252	0.000120591	172	163	173	262	294	396
1259	ENSG00000186918	100.276	-1.06954	0.235879	-4.5343	5.77954e-06	7.35228e-05	ZNF395	55893	0.000121533	129	138	140	58	70	67
1260	ENSG00000104064	171.366	-0.924592	0.203995	-4.53243	5.831e-06	7.40958e-05	GABPB1	55056	0.00012248	231	212	230	102	141	112
1261	ENSG00000137752	14.9058	2.90222	0.640337	4.53232	5.83384e-06	7.40958e-05	CASP1	834	0.00012248	4	3	3	26	25	28
1262	ENSG00000143842	127.557	-0.996799	0.219945	-4.53203	5.84184e-06	7.41386e-05	SOX13	9580	0.000122551	163	167	180	91	93	72
1263	ENSG00000166803	84.0945	-1.38193	0.304963	-4.53147	5.85757e-06	7.42794e-05	KIAA0101	9768	0.000122784	136	137	92	44	66	31
1264	ENSG00000198860	326.54	-0.80032	0.176643	-4.53071	5.87862e-06	7.44874e-05	TSEN15	116461	0.000123127	362	393	489	227	248	240
1265	ENSG00000176153	15378.7	0.637915	0.140849	4.52908	5.92412e-06	7.50045e-05	GPX2	2877	0.000123982	12150	10097	13852	19100	19054	18020
1266	ENSG00000100227	621.572	-0.786905	0.173797	-4.52772	5.96247e-06	7.54304e-05	POLDIP3	84271	0.000124686	812	808	741	564	439	366
1267	ENSG00000114354	1383.72	0.575253	0.12706	4.52742	5.97074e-06	7.5435e-05	TFG	10342	0.000124694	1118	1042	1174	1622	1701	1645
1268	ENSG00000135185	80.6754	1.14781	0.253527	4.52737	5.97225e-06	7.5435e-05	TMEM243	79161	0.000124694	48	51	51	109	115	109
1269	ENSG00000120063	311.071	-0.927864	0.205045	-4.52516	6.03491e-06	7.61663e-05	GNA13	10672	0.000125903	426	425	373	263	230	151
1270	ENSG00000115484	2729.53	-0.604245	0.133581	-4.52342	6.08473e-06	7.67325e-05	CCT4	10575	0.000126839	3290	3516	3073	2411	2102	1985
1271	ENSG00000158373	199.019	0.93386	0.206457	4.52326	6.08935e-06	7.67325e-05	HIST1H2BD	3017	0.000126839	140	106	165	282	254	247
1272	ENSG00000173692	1662.84	-0.697738	0.154279	-4.52259	6.1088e-06	7.69171e-05	PSMD1	5707	0.000127144	2298	1923	1952	1461	1282	1063
1273	ENSG00000143799	1477.99	-0.669409	0.14803	-4.52213	6.12205e-06	7.70234e-05	PARP1	142	0.000127319	1949	1949	1546	1175	1224	1025
1274	ENSG00000149925	536.531	-0.818359	0.18101	-4.52106	6.15295e-06	7.73514e-05	ALDOA	226	0.000127862	632	805	618	456	314	396
1275	ENSG00000165244	38.3377	-1.91099	0.422765	-4.52022	6.17762e-06	7.76005e-05	ZNF367	195828	0.000128274	75	71	36	14	23	11
1276	ENSG00000147044	510.32	0.675562	0.149477	4.5195	6.19869e-06	7.78043e-05	CASK	8573	0.00012861	419	390	369	677	592	614
1277	ENSG00000136108	298.879	-0.807758	0.178761	-4.51864	6.22381e-06	7.80583e-05	CKAP2	26586	0.00012903	395	391	355	240	234	178
1278	ENSG00000140092	249.267	0.92376	0.204684	4.51311	6.3883e-06	8.00586e-05	FBLN5	10516	0.000132337	174	152	190	250	383	346
1279	ENSG00000141232	2147.33	0.697711	0.154625	4.51228	6.41345e-06	8.02573e-05	TOB1	10140	0.000132665	1804	1303	1807	2549	2845	2576
1280	ENSG00000105248	166.232	-0.894136	0.198157	-4.51226	6.41417e-06	8.02573e-05	CCDC94	55702	0.000132665	196	235	217	116	122	111
1281	ENSG00000235734	138.525	-0.987075	0.218837	-4.51054	6.46619e-06	8.0845e-05	HMGN1P36	NA	0.000133637	170	179	203	84	110	85
1282	ENSG00000269343	122.283	1.05152	0.233174	4.50962	6.49444e-06	8.11349e-05	ZNF587B	100293516	0.000134116	70	91	78	142	159	194
1283	ENSG00000226415	672.399	-0.67155	0.148921	-4.50945	6.49956e-06	8.11356e-05	TPI1P1	NA	0.000134117	891	862	726	553	504	499
1284	ENSG00000134453	556.032	-0.664948	0.147477	-4.50882	6.51897e-06	8.13145e-05	RBM17	84991	0.000134413	654	684	707	393	469	428
1285	ENSG00000129566	210.595	0.95017	0.210936	4.50454	6.65154e-06	8.29035e-05	TEP1	7011	0.000137039	158	119	154	230	267	336
1286	ENSG00000065978	8825.4	-0.661561	0.146873	-4.50431	6.65903e-06	8.29324e-05	YBX1	4904	0.000137087	11027	10813	10603	7844	7144	5522
1287	ENSG00000166881	89.7952	-1.18561	0.263321	-4.50252	6.71521e-06	8.35106e-05	NEMP1	23306	0.000138043	135	133	106	43	66	56
1288	ENSG00000214900	85.637	1.2195	0.270849	4.5025	6.71589e-06	8.35106e-05	LINC01588	283551	0.000138043	61	42	51	145	101	114
1289	ENSG00000053108	198.785	0.942721	0.209462	4.50069	6.77342e-06	8.41607e-05	FSTL4	23105	0.000139117	159	126	122	210	293	282
1290	ENSG00000276043	238.004	-1.24305	0.276433	-4.49676	6.89974e-06	8.56638e-05	UHRF1	29128	0.000141602	299	477	227	99	193	132
1291	ENSG00000120686	281.538	0.839266	0.186691	4.49548	6.94129e-06	8.61129e-05	UFM1	51569	0.000142344	200	174	232	313	364	406
1292	ENSG00000183049	171.56	0.875746	0.194851	4.49444	6.97526e-06	8.64674e-05	CAMK1D	57118	0.00014293	121	125	117	215	207	245
1293	ENSG00000123700	68.6804	1.27836	0.284599	4.49181	7.06219e-06	8.74617e-05	KCNJ2	3759	0.000144574	44	34	42	81	102	110
1294	ENSG00000188761	98.4057	1.10856	0.246803	4.49168	7.0664e-06	8.74617e-05	BCL2L15	440603	0.000144574	62	64	62	110	157	136
1295	ENSG00000168259	764.171	-0.716352	0.159534	-4.49027	7.11338e-06	8.79706e-05	DNAJC7	7266	0.000145415	896	844	1110	586	631	517
1296	ENSG00000168268	705.072	-0.839568	0.186983	-4.49008	7.11967e-06	8.79706e-05	NT5DC2	64943	0.000145415	1024	1018	671	502	575	440
1297	ENSG00000092096	88.9212	1.39302	0.310268	4.48975	7.13074e-06	8.79706e-05	SLC22A17	51310	0.000145415	56	36	54	79	143	165
1298	ENSG00000047644	469.54	0.809854	0.180381	4.48968	7.13318e-06	8.79706e-05	WWC3	55841	0.000145415	358	316	350	461	645	689
1299	ENSG00000100281	189.724	-0.885041	0.19713	-4.48962	7.13498e-06	8.79706e-05	HMGXB4	10042	0.000145415	227	254	258	148	140	112
1300	ENSG00000134538	17.8844	3.17869	0.708597	4.48589	7.26109e-06	8.94567e-05	SLCO1B1	10599	0.000147872	4	1	6	11	50	36
1301	ENSG00000214530	506.311	-0.838912	0.187043	-4.48512	7.2872e-06	8.97093e-05	STARD10	10809	0.000148289	731	500	718	404	379	306
1302	ENSG00000171714	89.5235	1.1121	0.248101	4.48244	7.37947e-06	9.07754e-05	ANO5	203859	0.000150052	62	58	49	113	125	129
1303	ENSG00000131504	1902.51	-0.682066	0.152207	-4.48117	7.42366e-06	9.11867e-05	DIAPH1	1729	0.000150731	2545	2384	2103	1571	1605	1207
1304	ENSG00000180210	262.201	0.850572	0.189811	4.48115	7.4243e-06	9.11867e-05	F2	2147	0.000150731	216	161	184	288	363	361
1305	ENSG00000277639	28.4615	1.87685	0.419111	4.47816	7.52879e-06	9.23993e-05	RP11-467J12.4	105371267	0.000152736	13	11	12	45	42	47
1306	ENSG00000231167	383.956	-0.697494	0.155779	-4.47747	7.55338e-06	9.26302e-05	YBX1P2	NA	0.000153117	469	455	501	285	315	279
1307	ENSG00000085982	343.946	-0.729109	0.162856	-4.47701	7.56958e-06	9.27577e-05	USP40	55230	0.000153328	433	465	390	274	248	255
1308	ENSG00000168802	698.916	-0.709555	0.158554	-4.47516	7.63546e-06	9.34935e-05	CHTF8	54921	0.000154545	930	895	777	616	507	468
1309	ENSG00000102572	1637.48	-0.776816	0.173607	-4.47456	7.65674e-06	9.36825e-05	STK24	8428	0.000154857	2249	1759	2196	1227	1452	942
1310	ENSG00000187957	405.576	1.18658	0.265337	4.47198	7.74995e-06	9.47505e-05	DNER	92737	0.000156622	325	213	205	317	752	622
1311	ENSG00000132357	216.027	0.877466	0.196353	4.46883	7.865e-06	9.60413e-05	CARD6	84674	0.000158756	160	125	172	306	285	248
1312	ENSG00000174827	70.0297	1.65173	0.369617	4.46876	7.86752e-06	9.60413e-05	PDZK1	5174	0.000158756	35	25	41	50	143	126
1313	ENSG00000059728	25.0403	2.13804	0.478517	4.46806	7.89326e-06	9.62822e-05	MXD1	4084	0.000159154	12	6	10	54	35	34
1314	ENSG00000119522	447.008	-0.767975	0.171926	-4.46689	7.93658e-06	9.67369e-05	DENND1A	57706	0.000159906	593	541	555	387	339	266
1315	ENSG00000166897	103.746	1.16215	0.260191	4.46654	7.94951e-06	9.68208e-05	ELFN2	114794	0.000160044	62	80	49	173	126	131
1316	ENSG00000276023	226.332	0.948075	0.212346	4.46476	8.01577e-06	9.75536e-05	DUSP14	11072	0.000161256	119	192	153	298	258	337
1317	ENSG00000108518	8114.58	-0.602657	0.135019	-4.4635	8.0631e-06	9.80551e-05	PFN1	5216	0.000162085	9343	10845	9168	7059	6516	5757
1318	ENSG00000179532	44.4672	2.00811	0.450053	4.46194	8.12195e-06	9.86958e-05	DNHD1	144132	0.000163144	17	17	20	37	50	127
1319	ENSG00000149948	71.9944	-1.61937	0.362957	-4.46161	8.13461e-06	9.87748e-05	HMGA2	8091	0.000163274	70	133	122	57	29	20
1320	ENSG00000142856	74.935	-1.27338	0.285495	-4.46024	8.1868e-06	9.93332e-05	ITGB3BP	23421	0.000164197	125	93	100	39	56	37
1321	ENSG00000138496	224.072	0.936451	0.210008	4.45912	8.22975e-06	9.97787e-05	PARP9	83666	0.000164934	194	130	137	250	306	328
1322	ENSG00000188483	310.425	-0.823143	0.184681	-4.4571	8.3074e-06	0.000100644	IER5L	389792	0.000166364	335	420	435	189	248	236
1323	ENSG00000146039	17.0286	3.25362	0.730507	4.45392	8.4318e-06	0.000102074	SLC17A4	10050	0.000168728	3	3	4	8	46	39
1324	ENSG00000125505	1921.24	0.597598	0.134202	4.45296	8.46934e-06	0.000102451	MBOAT7	79143	0.000169351	1658	1581	1347	2415	2303	2224
1325	ENSG00000182612	20.7125	2.29057	0.514615	4.45103	8.54604e-06	0.000103301	TSPAN10	83882	0.000170756	9	5	7	39	29	36
1326	ENSG00000258741	74.8082	-1.19339	0.268229	-4.44913	8.62186e-06	0.000104139	RP11-386M24.4	NA	0.000172141	110	109	94	41	51	45
1327	ENSG00000182628	381.07	-0.742436	0.166943	-4.44724	8.6981e-06	0.00010498	SKA2	348235	0.000173532	477	519	435	301	307	247
1328	ENSG00000144579	485.37	-0.712339	0.160195	-4.4467	8.71997e-06	0.000105165	CTDSP1	58190	0.000173837	588	594	626	350	429	325
1329	ENSG00000147003	12.1752	5.22412	1.17512	4.44562	8.76393e-06	0.000105616	TMEM27	57393	0.000174582	2	0	0	36	19	16
1330	ENSG00000103034	63.0354	1.33667	0.30103	4.44032	8.98249e-06	0.000108168	NDRG4	65009	0.000178802	30	42	35	110	78	82
1331	ENSG00000118655	78.9245	-1.24163	0.279648	-4.43996	8.99756e-06	0.000108268	DCLRE1B	64858	0.000178967	108	136	88	42	54	45
1332	ENSG00000175567	764.805	0.834896	0.188131	4.43784	9.08676e-06	0.000109202	UCP2	7351	0.000180511	546	607	496	1281	857	802
1333	ENSG00000261780	682.75	0.718833	0.16198	4.43779	9.0888e-06	0.000109202	CTD-2354A18.1	100505817	0.000180511	577	469	502	724	967	858
1334	ENSG00000249353	833.647	-0.660198	0.148812	-4.43647	9.14462e-06	0.00010979	NPM1P27	NA	0.000181483	968	1101	994	670	710	558
1335	ENSG00000116221	1024.99	-0.603643	0.136182	-4.43262	9.30953e-06	0.000111686	MRPL37	51253	0.000184618	1270	1280	1159	861	837	743
1336	ENSG00000211584	618.291	0.799759	0.180469	4.43155	9.35581e-06	0.000112121	SLC48A1	55652	0.000185336	476	465	412	997	657	703
1337	ENSG00000203499	38.9055	1.62451	0.366587	4.43146	9.35976e-06	0.000112121	FAM83H-AS1	NA	0.000185336	14	24	20	66	56	54
1338	ENSG00000143390	427.238	0.687169	0.155106	4.43031	9.40994e-06	0.000112638	RFX5	5993	0.00018619	349	300	333	550	488	543
1339	ENSG00000106066	38.1459	1.98677	0.448557	4.42924	9.45655e-06	0.000113111	CPVL	54504	0.000186973	15	22	9	30	74	79
1340	ENSG00000138834	65.5767	1.82757	0.412638	4.42899	9.46765e-06	0.00011316	MAPK8IP3	23162	0.000187053	28	39	20	56	72	179
1341	ENSG00000143368	1163.76	-0.646333	0.145969	-4.42787	9.51686e-06	0.000113663	SF3B4	10262	0.000187885	1378	1566	1317	978	953	791
1342	ENSG00000133103	118.032	1.07865	0.243681	4.42649	9.57806e-06	0.000114309	COG6	57511	0.000188952	70	88	69	146	136	199
1343	ENSG00000230409	547.987	-0.702763	0.158777	-4.42609	9.59544e-06	0.000114431	TCEA1P2	NA	0.000189154	665	686	686	482	414	355
1344	ENSG00000101189	233.685	-0.820719	0.185441	-4.42576	9.61027e-06	0.000114503	MRGBP	55257	0.000189273	284	344	267	160	171	176
1345	ENSG00000099800	534.629	-0.680899	0.153853	-4.42564	9.61581e-06	0.000114503	TIMM13	26517	0.000189273	655	730	590	441	395	397
1346	ENSG00000167740	270.068	0.995466	0.224961	4.42506	9.6415e-06	0.000114724	CYB5D2	124936	0.000189638	188	117	236	339	377	363
1347	ENSG00000167615	398.987	1.23326	0.278833	4.42292	9.73747e-06	0.00011578	LENG8	114823	0.000191384	220	267	228	332	434	913
1348	ENSG00000180198	591.686	-0.819803	0.185361	-4.42274	9.7456e-06	0.00011579	RCC1	1104	0.000191401	735	953	578	413	450	421
1349	ENSG00000198715	252.038	0.777015	0.1757	4.42239	9.76165e-06	0.000115895	GLMP	112770	0.000191574	190	186	181	340	282	333
1350	ENSG00000128510	141.527	3.37337	0.762873	4.42193	9.78236e-06	0.000116055	CPA4	51200	0.000191839	32	35	7	410	125	240
1351	ENSG00000099817	1210.63	-0.752355	0.170156	-4.42156	9.79917e-06	0.000116168	POLR2E	5434	0.000192026	1527	1725	1306	1065	912	729
1352	ENSG00000197912	615.971	0.678376	0.153502	4.41934	9.90006e-06	0.000117278	SPG7	6687	0.00019386	459	522	441	727	697	851
1353	ENSG00000100505	45.7846	-1.57823	0.357135	-4.41913	9.90972e-06	0.000117305	TRIM9	114088	0.000193905	52	66	88	19	23	27
1354	ENSG00000015413	15.8484	3.00441	0.680032	4.41804	9.95996e-06	0.000117813	DPEP1	1800	0.000194745	5	1	4	15	33	37
1355	ENSG00000058056	164.329	-0.937003	0.212143	-4.41686	1.00147e-05	0.000118373	USP13	8975	0.000195671	214	223	211	105	140	93
1356	ENSG00000127129	14.3017	3.16005	0.715685	4.41542	1.00814e-05	0.000119074	EDN2	1907	0.000196829	4	2	3	41	17	19
1357	ENSG00000263639	17.358	2.85752	0.64746	4.41343	1.01747e-05	0.000120033	MSMB	4477	0.000198414	4	2	7	19	24	48
1358	ENSG00000116857	1057.54	0.818672	0.185498	4.41337	1.01776e-05	0.000120033	TMEM9	252839	0.000198414	791	783	721	968	1404	1677
1359	ENSG00000167889	338.702	-0.80023	0.181425	-4.4108	1.02988e-05	0.000121302	MGAT5B	146664	0.000200511	414	494	382	220	289	233
1360	ENSG00000116679	512.03	0.663348	0.150393	4.41077	1.03003e-05	0.000121302	IVNS1ABP	10625	0.000200511	371	385	433	633	664	586
1361	ENSG00000213639	583.12	0.642194	0.145602	4.41061	1.03081e-05	0.000121304	PPP1CB	5500	0.000200515	476	466	425	678	768	687
1362	ENSG00000109511	137.942	1.38147	0.313299	4.40943	1.03642e-05	0.00012186	ANXA10	11199	0.000201434	81	58	90	102	212	284
1363	ENSG00000105429	1318.47	0.803849	0.182308	4.4093	1.03706e-05	0.00012186	MEGF8	1954	0.000201434	1186	992	702	1837	1684	1509
1364	ENSG00000153879	678.867	-0.966181	0.219134	-4.40909	1.03806e-05	0.000121888	CEBPG	1054	0.00020148	692	740	1263	400	548	431
1365	ENSG00000178449	335.596	0.878619	0.199424	4.40577	1.05407e-05	0.000123678	COX14	84987	0.000204439	227	220	263	334	426	544
1366	ENSG00000099991	475.568	-0.771719	0.175174	-4.40544	1.0557e-05	0.000123778	CABIN1	23523	0.000204606	614	672	514	412	302	340
1367	ENSG00000086619	52.5463	1.41416	0.321189	4.40291	1.06809e-05	0.000125084	ERO1B	56605	0.000206764	26	30	30	61	77	91
1368	ENSG00000140848	260.385	-0.826114	0.187632	-4.40285	1.0684e-05	0.000125084	CPNE2	221184	0.000206764	335	357	307	216	195	153
1369	ENSG00000163346	258.754	0.804148	0.182704	4.40138	1.07566e-05	0.000125778	PBXIP1	57326	0.00020791	186	175	205	367	282	338
1370	ENSG00000157404	19.6418	3.3836	0.768768	4.40133	1.07589e-05	0.000125778	KIT	3815	0.00020791	8	1	1	8	46	54
1371	ENSG00000114315	330.369	1.03239	0.234573	4.40117	1.07671e-05	0.000125781	HES1	3280	0.000207916	196	158	297	369	400	562
1372	ENSG00000243137	12.6615	4.20838	0.956419	4.40015	1.08178e-05	0.000126282	PSG4	5672	0.000208743	0	2	2	45	17	10
1373	ENSG00000120594	30.8562	1.86283	0.423461	4.39905	1.08727e-05	0.00012683	PLXDC2	84898	0.00020965	20	12	8	49	46	51
1374	ENSG00000103148	486.866	-0.657193	0.149486	-4.39636	1.10081e-05	0.000128315	NPRL3	8131	0.000212105	574	617	597	407	380	346
1375	ENSG00000132581	481.639	0.647202	0.147234	4.39575	1.10391e-05	0.000128584	SDF2	6388	0.000212548	392	377	357	589	558	617
1376	ENSG00000279800	374.545	-0.76102	0.173157	-4.39497	1.10789e-05	0.000128953	BCLAF1P2	NA	0.000213159	526	457	430	309	289	236
1377	ENSG00000069998	282.019	-0.801367	0.182347	-4.39474	1.10904e-05	0.000128993	CECR5	27440	0.000213226	337	403	335	227	174	216
1378	ENSG00000122565	1332.85	-0.6045	0.13759	-4.39351	1.11537e-05	0.000129636	CBX3	11335	0.000214288	1703	1586	1534	1011	1185	978
1379	ENSG00000166224	846.785	-0.678337	0.154503	-4.39046	1.13112e-05	0.000131371	SGPL1	8879	0.000217156	1039	1014	1074	708	714	532
1380	ENSG00000101928	111.033	0.979123	0.223073	4.38924	1.13746e-05	0.000132012	MOSPD1	56180	0.000218215	79	72	74	143	146	153
1381	ENSG00000174938	950.018	0.653959	0.149053	4.38742	1.14701e-05	0.000132988	SEZ6L2	26470	0.000219829	766	678	770	1332	1113	1040
1382	ENSG00000101146	485.943	-0.648755	0.14787	-4.38732	1.14753e-05	0.000132988	RAE1	8480	0.000219829	604	598	578	347	395	393
1383	ENSG00000088812	785.396	0.654233	0.149131	4.38697	1.14939e-05	0.000133107	ATRN	8455	0.000220026	705	580	545	975	926	982
1384	ENSG00000162366	97.0089	1.5703	0.358022	4.38604	1.15433e-05	0.000133582	PDZK1IP1	10158	0.000220811	36	85	26	192	111	132
1385	ENSG00000245680	45.0235	1.56775	0.357457	4.38583	1.15546e-05	0.000133616	ZNF585B	92285	0.000220867	16	24	29	52	76	74
1386	ENSG00000138768	846.246	0.705245	0.160834	4.38493	1.16021e-05	0.000134068	USO1	8615	0.000221615	707	572	652	1222	1024	901
1387	ENSG00000102007	3264.26	-0.644794	0.147054	-4.38473	1.16129e-05	0.000134097	PLP2	5355	0.000221662	4194	3721	4031	2227	3026	2388
1388	ENSG00000183814	61.1036	-1.35554	0.309304	-4.38254	1.17306e-05	0.000135358	LIN9	286826	0.000223747	81	100	82	25	44	34
1389	ENSG00000179241	151.031	-0.894061	0.204035	-4.3819	1.17649e-05	0.000135657	LDLRAD3	143458	0.00022424	205	206	178	103	113	100
1390	ENSG00000108175	632.219	-0.717884	0.163872	-4.38078	1.18257e-05	0.000136259	ZMIZ1	57178	0.000225237	726	881	752	556	467	411
1391	ENSG00000196642	864.937	-0.653483	0.149197	-4.37999	1.18686e-05	0.000136656	RABL6	55684	0.000225891	1099	1112	961	719	717	581
1392	ENSG00000071553	1743.15	0.547999	0.12519	4.37735	1.20131e-05	0.000138219	ATP6AP1	537	0.000228476	1497	1325	1425	2114	2005	2092
1393	ENSG00000131023	118.75	-0.978787	0.22372	-4.37505	1.21407e-05	0.000139587	LATS1	9113	0.000230737	178	148	146	81	82	78
1394	ENSG00000172572	1209.61	0.605628	0.138457	4.37414	1.21911e-05	0.000140066	PDE3A	5139	0.000231529	1041	862	975	1482	1542	1356
1395	ENSG00000082898	976.913	-0.657613	0.150388	-4.37278	1.22675e-05	0.000140767	XPO1	7514	0.000232688	1239	1279	1068	799	822	654
1396	ENSG00000136271	1568.45	-0.533067	0.121907	-4.37274	1.22697e-05	0.000140767	DDX56	54606	0.000232688	1802	1847	1916	1288	1289	1269
1397	ENSG00000106609	1088.69	0.598172	0.136828	4.37172	1.23273e-05	0.000141327	TMEM248	55069	0.000233614	882	915	801	1261	1428	1245
1398	ENSG00000086589	439.748	-0.653288	0.149487	-4.37021	1.24129e-05	0.00014218	RBM22	55696	0.000235024	540	537	536	316	356	354
1399	ENSG00000272068	68.9729	1.23553	0.282724	4.37009	1.24195e-05	0.00014218	RP11-284F21.9	NA	0.000235024	40	44	39	83	92	116
1400	ENSG00000079387	150.824	-0.950891	0.217624	-4.36943	1.24572e-05	0.000142511	SENP1	29843	0.00023557	204	210	182	91	127	91
1401	ENSG00000268034	129.287	-1.12169	0.256757	-4.36867	1.25003e-05	0.000142901	AC005795.1	NA	0.000236216	192	204	136	105	77	61
1402	ENSG00000086504	969.084	-0.610603	0.139808	-4.36743	1.25718e-05	0.000143616	MRPL28	10573	0.000237397	1139	1246	1129	841	764	696
1403	ENSG00000163430	615.963	0.838142	0.191929	4.36694	1.26001e-05	0.000143837	FSTL1	406975	0.000237761	486	529	309	778	736	857
1404	ENSG00000186994	24.4802	2.30519	0.527924	4.36651	1.26246e-05	0.000144014	KANK3	256949	0.000238054	11	12	2	49	26	47
1405	ENSG00000105204	191.475	1.0317	0.236285	4.36634	1.26347e-05	0.000144026	DYRK1B	9149	0.000238075	116	92	170	304	234	233
1406	ENSG00000099337	167.044	0.981782	0.225229	4.35904	1.30631e-05	0.000148805	KCNK6	9424	0.000245974	137	97	103	176	252	238
1407	ENSG00000099284	308.405	-0.729327	0.167376	-4.35741	1.31613e-05	0.000149816	H2AFY2	55506	0.000247646	351	387	416	216	241	239
1408	ENSG00000110721	210.097	-0.936949	0.215107	-4.35573	1.32622e-05	0.000150826	CHKA	1119	0.000249314	309	273	247	182	141	110
1409	ENSG00000213398	18.126	2.92683	0.671966	4.35562	1.32688e-05	0.000150826	LCAT	3931	0.000249314	3	5	5	11	33	52
1410	ENSG00000240875	24.0319	2.16396	0.49688	4.35509	1.33011e-05	0.000151085	LINC00886	730091	0.000249743	6	6	14	39	31	48
1411	ENSG00000077514	152.873	-0.994929	0.228471	-4.35473	1.33231e-05	0.000151129	POLD3	10714	0.000249815	201	242	168	89	124	94
1412	ENSG00000167700	499.532	0.694288	0.159438	4.35459	1.33318e-05	0.000151129	MFSD3	113655	0.000249815	423	386	335	677	570	606
1413	ENSG00000104870	224.45	0.859034	0.197272	4.35456	1.33332e-05	0.000151129	FCGRT	2217	0.000249815	146	136	196	275	280	314
1414	ENSG00000181704	571.299	0.6386	0.146799	4.35017	1.36035e-05	0.000154083	YIPF6	286451	0.000254699	493	412	436	714	701	672
1415	ENSG00000132507	6390.49	-0.610398	0.140358	-4.34886	1.36846e-05	0.000154893	EIF5A	1984	0.000256037	7032	9042	7094	5343	5065	4767
1416	ENSG00000166503	409.135	-0.692066	0.159152	-4.34847	1.37089e-05	0.000155057	RP11-382A20.3	50810	0.00025631	491	540	485	328	334	277
1417	ENSG00000077585	63.7182	1.29736	0.298619	4.34452	1.39582e-05	0.000157766	GPR137B	7107	0.000260787	32	30	48	99	90	82
1418	ENSG00000110108	548.582	-0.774496	0.178276	-4.34435	1.39686e-05	0.000157772	TMEM109	79073	0.000260798	733	790	553	410	455	349
1419	ENSG00000149262	227.723	-0.813988	0.187505	-4.34115	1.41741e-05	0.000159981	INTS4	92105	0.000264448	293	269	309	153	193	150
1420	ENSG00000078401	383.229	0.873978	0.201365	4.34027	1.42306e-05	0.000160505	EDN1	1906	0.000265315	211	287	314	450	424	614
1421	ENSG00000130005	272.466	0.882293	0.203377	4.33822	1.43642e-05	0.000161897	GAMT	2593	0.000267616	211	207	157	433	291	336
1422	ENSG00000104147	33.6786	-1.71124	0.394674	-4.33584	1.45206e-05	0.000163546	OIP5	11339	0.000270341	53	58	44	14	20	13
1423	ENSG00000104980	408.913	-0.754688	0.174176	-4.33289	1.47164e-05	0.0001656	TIMM44	10469	0.000273737	460	472	609	273	309	331
1424	ENSG00000254166	151.614	1.27898	0.295188	4.33278	1.47237e-05	0.0001656	CASC19	NA	0.000273737	87	79	100	338	140	166
1425	ENSG00000169429	221.644	1.18362	0.273212	4.33224	1.476e-05	0.000165893	CXCL8	3576	0.00027422	84	137	186	347	209	367
1426	ENSG00000129484	247.701	-0.825149	0.190537	-4.33066	1.48664e-05	0.000166971	PARP2	10038	0.000276003	314	312	324	143	213	180
1427	ENSG00000164091	820.4	-0.640853	0.148029	-4.32924	1.49622e-05	0.000167929	WDR82	80335	0.000277586	1008	1077	913	649	705	569
1428	ENSG00000150593	303.944	0.818774	0.189208	4.32738	1.50893e-05	0.000169237	PDCD4	100616113	0.000279748	195	210	256	458	371	335
1429	ENSG00000160563	196.382	-0.807617	0.18666	-4.32667	1.5138e-05	0.000169664	MED27	9442	0.000280454	249	271	230	149	142	137
1430	ENSG00000232533	80.9231	1.14761	0.265368	4.32462	1.52794e-05	0.000171129	AC093673.5	NA	0.000282876	54	46	50	95	107	132
1431	ENSG00000096746	656.751	-0.653079	0.151054	-4.32348	1.53588e-05	0.000171898	HNRNPH3	3189	0.000284147	805	874	730	459	557	516
1432	ENSG00000052802	1097.43	0.622839	0.144157	4.32055	1.55638e-05	0.000174071	MSMO1	6307	0.000287739	960	776	855	1391	1397	1204
1433	ENSG00000114841	22.5084	2.589	0.599576	4.31805	1.57412e-05	0.000175932	DNAH1	25981	0.000290815	6	8	5	22	21	73
1434	ENSG00000026508	2677.15	0.675755	0.156552	4.31648	1.58538e-05	0.000177067	CD44	960	0.000292692	2000	1881	2303	2763	3906	3209
1435	ENSG00000141052	72.4461	-1.36273	0.315834	-4.3147	1.5982e-05	0.000178374	MYOCD	93649	0.000294852	90	107	116	58	40	24
1436	ENSG00000106366	663.98	2.44213	0.566409	4.31161	1.6207e-05	0.00018076	SERPINE1	5054	0.000298795	124	324	172	1729	646	990
1437	ENSG00000100216	943.576	-0.672446	0.156039	-4.30947	1.63648e-05	0.000182354	TOMM22	56993	0.000301431	1073	1298	1108	828	733	622
1438	ENSG00000221968	112.598	1.01885	0.236427	4.30936	1.63727e-05	0.000182354	FADS3	3995	0.000301431	64	87	72	168	131	153
1439	ENSG00000135506	1659.01	0.583899	0.135539	4.30799	1.64745e-05	0.000183361	OS9	10956	0.000303095	1330	1222	1432	1820	2154	1996
1440	ENSG00000152463	19.4208	2.71575	0.630451	4.30763	1.65016e-05	0.000183534	OLAH	55301	0.000303382	6	3	6	13	35	53
1441	ENSG00000235001	213.267	-0.771051	0.179043	-4.30651	1.65848e-05	0.000184331	EIF4A1P2	NA	0.000304699	261	286	259	158	159	156
1442	ENSG00000138069	1834.6	0.533579	0.123924	4.30569	1.66465e-05	0.000184889	RAB1A	5861	0.000305621	1546	1411	1540	2208	2218	2084
1443	ENSG00000155252	191.042	0.822025	0.190994	4.30393	1.67794e-05	0.000186206	PI4K2A	55361	0.000307799	128	147	139	272	229	232
1444	ENSG00000112378	1758.66	0.690092	0.160344	4.30381	1.67883e-05	0.000186206	PERP	64065	0.000307799	1329	1242	1467	2657	1992	1865
1445	ENSG00000170962	323.834	0.793885	0.18452	4.30244	1.68929e-05	0.000187237	PDGFD	80310	0.000309502	239	191	281	452	397	383
1446	ENSG00000179632	1319.23	-0.557349	0.129563	-4.30176	1.6945e-05	0.000187684	MAF1	84232	0.000310241	1541	1586	1586	1079	1141	983
1447	ENSG00000085998	653.716	0.602612	0.140126	4.30049	1.70419e-05	0.000188626	POMGNT1	55624	0.000311799	531	544	482	816	758	791
1448	ENSG00000108468	583.372	-0.764524	0.177815	-4.29955	1.71142e-05	0.000189297	CBX1	10951	0.000312907	776	809	618	479	473	344
1449	ENSG00000077782	619.899	0.862197	0.200553	4.29909	1.71497e-05	0.000189558	FGFR1	2260	0.000313339	482	515	323	630	841	929
1450	ENSG00000256663	65.0335	-1.50022	0.349012	-4.29849	1.71966e-05	0.000189946	RP11-424C20.2	NA	0.00031398	89	138	61	25	42	35
1451	ENSG00000141905	954.623	-0.643305	0.149811	-4.29412	1.7539e-05	0.000193594	NFIC	4782	0.00032001	1157	1275	1060	794	799	644
1452	ENSG00000048028	182.171	-0.859295	0.20013	-4.29369	1.75727e-05	0.000193832	USP28	57646	0.000320404	244	248	212	118	151	119
1453	ENSG00000099797	1360.11	-0.621875	0.144853	-4.29315	1.76156e-05	0.000194172	TECR	693224	0.000320966	1662	1584	1700	1119	1193	903
1454	ENSG00000135454	304.635	-0.869145	0.202466	-4.29279	1.76445e-05	0.000194356	B4GALNT1	2583	0.00032127	434	450	297	217	246	184
1455	ENSG00000168936	310.591	0.708837	0.165131	4.29259	1.76603e-05	0.000194397	TMEM129	92305	0.000321337	239	223	246	378	359	419
1456	ENSG00000065060	290.736	-0.823353	0.191833	-4.29203	1.77048e-05	0.000194752	UHRF1BP1	54887	0.000321925	360	343	411	261	190	179
1457	ENSG00000113407	2648.35	-0.646156	0.150659	-4.28885	1.79597e-05	0.000197421	TARS	6897	0.000326336	2953	2931	3812	2210	2155	1829
1458	ENSG00000181938	145.152	-0.919028	0.214396	-4.28659	1.81434e-05	0.000199304	GINS3	64785	0.000329449	186	204	180	89	120	93
1459	ENSG00000137876	1235.11	-0.81158	0.189418	-4.28459	1.83074e-05	0.000200967	RSL24D1	51187	0.000332198	1293	1300	2128	893	941	856
1460	ENSG00000087842	646.17	-0.664364	0.155085	-4.28386	1.83675e-05	0.000201489	PIR	8544	0.000333061	786	683	908	501	482	516
1461	ENSG00000157212	96.564	-1.09342	0.255411	-4.28103	1.86031e-05	0.000203934	PAXIP1	22976	0.000337103	148	140	106	53	71	61
1462	ENSG00000172197	25.5769	-1.99049	0.465011	-4.28053	1.86448e-05	0.000204252	MBOAT1	154141	0.000337627	46	42	34	6	13	12
1463	ENSG00000185404	113.385	1.09277	0.255339	4.27968	1.8716e-05	0.000204807	SP140L	93349	0.000338546	79	64	74	202	124	137
1464	ENSG00000167393	92.7151	-1.16398	0.271983	-4.27962	1.87212e-05	0.000204807	PPP2R3B	28227	0.000338546	119	157	109	43	59	70
1465	ENSG00000175826	768.073	-0.62579	0.146287	-4.27782	1.88731e-05	0.000206329	CTDNEP1	23399	0.000341061	959	1001	836	644	618	551
1466	ENSG00000274180	47.3429	1.60226	0.374805	4.27492	1.91209e-05	0.000208895	NATD1	256302	0.000345304	14	22	35	91	56	67
1467	ENSG00000086548	32740.2	0.757293	0.177262	4.27216	1.93587e-05	0.000211349	CEACAM6	4680	0.00034936	30480	18961	23576	42842	46240	34342
1468	ENSG00000250899	70.3778	-1.28525	0.3012	-4.2671	1.98033e-05	0.000216056	RP11-253E3.3	NA	0.00035714	111	116	73	48	43	32
1469	ENSG00000227619	64.0024	1.63154	0.382427	4.26629	1.98754e-05	0.000216694	RP11-492E3.2	NA	0.000358195	37	33	23	44	122	125
1470	ENSG00000105486	525.995	-0.739532	0.173416	-4.26451	2.00346e-05	0.000218221	LIG1	3978	0.000360719	700	759	515	401	402	379
1471	ENSG00000197408	21.5123	-2.32256	0.544637	-4.26442	2.00427e-05	0.000218221	CYP2B6	1555	0.000360719	26	30	51	11	6	4
1472	ENSG00000154920	42.6071	-1.5037	0.352712	-4.26325	2.01476e-05	0.000219214	EME1	146956	0.000362361	57	78	53	23	22	22
1473	ENSG00000119899	160.15	0.842495	0.19773	4.26085	2.03654e-05	0.000221434	SLC17A5	26503	0.00036603	122	116	106	216	207	195
1474	ENSG00000111653	100.087	1.29129	0.303097	4.26034	2.04119e-05	0.000221789	ING4	51147	0.000366617	50	39	85	113	128	184
1475	ENSG00000102100	440.393	0.665918	0.156313	4.26015	2.04286e-05	0.00022182	SLC35A2	7355	0.000366668	381	326	314	525	525	571
1476	ENSG00000242086	41.352	2.14812	0.504327	4.25938	2.04993e-05	0.000222437	LINC00969	NA	0.000367688	21	13	11	27	49	127
1477	ENSG00000111897	599.56	0.769954	0.180852	4.25736	2.06857e-05	0.000224307	SERINC1	57515	0.000370779	487	328	514	765	804	699
1478	ENSG00000172354	1772.28	-0.682169	0.160257	-4.25672	2.07449e-05	0.000224798	GNB2	2783	0.00037159	2255	2375	1921	1621	1326	1135
1479	ENSG00000117713	498.298	-0.744082	0.174812	-4.25647	2.07685e-05	0.0002249	ARID1A	8289	0.00037176	674	711	487	391	363	364
1480	ENSG00000242732	50.8247	1.59561	0.375051	4.25438	2.09628e-05	0.000226852	RGAG4	340526	0.000374985	39	17	20	100	60	69
1481	ENSG00000136869	37.2082	2.10451	0.494701	4.25412	2.09877e-05	0.000226968	TLR4	7099	0.000375177	17	12	13	113	36	32
1482	ENSG00000111775	2256.49	0.866367	0.20367	4.25377	2.10202e-05	0.000227166	COX6A1	1337	0.000375505	1454	1413	1929	2019	2948	3776
1483	ENSG00000196739	47.3507	1.87843	0.441617	4.25352	2.10437e-05	0.000227267	COL27A1	85301	0.000375671	20	22	20	33	61	129
1484	ENSG00000196220	47.5583	1.72648	0.405925	4.2532	2.10736e-05	0.000227436	SRGAP3	9901	0.000375951	25	19	23	114	38	67
1485	ENSG00000122862	353.429	0.689722	0.162182	4.25278	2.11133e-05	0.000227711	SRGN	5552	0.000376405	283	272	257	471	392	446
1486	ENSG00000205220	52.9703	1.32932	0.312663	4.25161	2.12236e-05	0.000228747	PSMB10	5699	0.000378118	31	29	30	74	65	89
1487	ENSG00000104904	2976.94	-0.533244	0.125559	-4.24695	2.16704e-05	0.000233405	OAZ1	4946	0.000385818	3402	3834	3326	2542	2419	2337
1488	ENSG00000225972	8247.48	1.61879	0.381212	4.24643	2.17201e-05	0.000233783	MTND1P23	NA	0.000386442	3877	2510	5768	9445	14623	13262
1489	ENSG00000140105	1816.45	-0.598931	0.141114	-4.24431	2.19271e-05	0.000235852	WARS	7453	0.000389863	2203	2173	2189	1645	1451	1238
1490	ENSG00000198752	1207.39	-0.639702	0.15082	-4.2415	2.22031e-05	0.000238661	CDC42BPB	9578	0.000394506	1517	1558	1338	1106	858	868
1491	ENSG00000196083	58.5638	1.28514	0.303009	4.24125	2.22274e-05	0.000238761	IL1RAP	3556	0.000394672	30	43	29	81	78	90
1492	ENSG00000119547	94.7204	1.11406	0.262779	4.23952	2.23995e-05	0.000240449	ONECUT2	9480	0.000397462	62	46	72	105	140	143
1493	ENSG00000065882	455.398	-0.723908	0.170764	-4.23922	2.24297e-05	0.000240612	TBC1D1	23216	0.000397731	590	577	535	397	357	277
1494	ENSG00000128342	242.643	1.1118	0.262375	4.23744	2.26079e-05	0.000242361	LIF	3976	0.000400623	119	194	148	304	220	470
1495	ENSG00000168890	94.4274	1.03565	0.24448	4.23615	2.27386e-05	0.000243599	TMEM150A	129303	0.000402669	66	56	64	112	127	141
1496	ENSG00000222009	24.0042	2.3609	0.557359	4.23588	2.27663e-05	0.000243734	BTBD19	149478	0.000402891	4	7	12	21	34	66
1497	ENSG00000228526	11.4717	4.49122	1.06088	4.23347	2.3011e-05	0.000246046	MIR34A	106614088	0.000406713	0	1	2	9	15	42
1498	ENSG00000182004	698.401	-0.686444	0.162148	-4.23345	2.3013e-05	0.000246046	SNRPE	6635	0.000406713	872	814	899	477	649	480
1499	ENSG00000167701	12.7802	3.39882	0.802934	4.233	2.30593e-05	0.000246376	GPT	2875	0.000407259	4	1	1	11	26	33
1500	ENSG00000124587	251.875	0.734599	0.17356	4.23254	2.31065e-05	0.000246716	PEX6	5190	0.00040782	199	187	181	342	296	306
1501	ENSG00000166716	568.73	-0.666616	0.157609	-4.22956	2.34145e-05	0.000249838	ZNF592	9640	0.000412981	769	721	604	480	424	415
1502	ENSG00000135778	690.455	0.721221	0.170673	4.22575	2.38144e-05	0.000253936	NTPCR	84284	0.000419755	468	526	570	775	752	1051
1503	ENSG00000211445	187.367	0.787235	0.186388	4.22364	2.40383e-05	0.000256153	GPX3	2878	0.00042342	129	137	146	235	231	246
1504	ENSG00000135624	4458.56	-0.54052	0.128065	-4.22066	2.43586e-05	0.000259394	CCT7	10574	0.000428777	5324	5579	4949	3968	3597	3333
1505	ENSG00000104824	1767.45	-0.616708	0.146171	-4.21908	2.45296e-05	0.000261041	HNRNPL	3191	0.0004315	2061	2492	1865	1353	1486	1348
1506	ENSG00000185924	10.303	4.94624	1.17289	4.21715	2.47408e-05	0.000263114	RTN4RL1	146760	0.000434926	0	1	1	15	25	19
1507	ENSG00000237975	10.6332	4.40378	1.04433	4.21684	2.47751e-05	0.000263303	FLG-AS1	339400	0.000435239	1	2	0	27	8	26
1508	ENSG00000039319	216.963	0.767766	0.182131	4.21546	2.49271e-05	0.000264743	ZFYVE16	9765	0.00043762	165	151	166	249	275	296
1509	ENSG00000140859	996.411	-0.712054	0.168975	-4.21396	2.50935e-05	0.000266334	KIFC3	3801	0.000440249	1182	1505	1025	747	679	840
1510	ENSG00000279095	160.062	0.86248	0.204846	4.21039	2.54928e-05	0.000270393	AC092066.1	NA	0.000446959	111	132	98	199	209	212
1511	ENSG00000139318	89.0231	1.2679	0.301257	4.20868	2.56865e-05	0.000272267	DUSP6	1848	0.000450056	32	48	77	109	126	141
1512	ENSG00000151498	119.041	1.03439	0.245819	4.20794	2.57711e-05	0.000272982	ACAD8	27034	0.000451239	79	73	83	136	137	207
1513	ENSG00000157570	20.7477	-2.09956	0.499614	-4.20237	2.64134e-05	0.000279601	TSPAN18	90139	0.000462181	36	32	33	9	7	7
1514	ENSG00000039068	1325.48	0.685626	0.163234	4.20026	2.66614e-05	0.00028204	CDH1	999	0.000466212	1148	822	1079	1414	1790	1700
1515	ENSG00000164347	352.344	0.689477	0.164213	4.19869	2.68469e-05	0.000283815	GFM2	84340	0.000469146	265	265	280	469	380	455
1516	ENSG00000076864	482.693	-0.793643	0.189043	-4.19822	2.69022e-05	0.000284212	RAP1GAP	5909	0.000469802	718	454	664	365	376	319
1517	ENSG00000105576	263.426	0.863202	0.205649	4.19745	2.69942e-05	0.000284996	TNPO2	30000	0.000471099	200	220	141	331	296	393
1518	ENSG00000124222	158.404	0.97645	0.232698	4.19621	2.71422e-05	0.000286087	STX16	8675	0.000472902	95	111	115	190	167	273
1519	ENSG00000182871	731.993	0.866212	0.206428	4.1962	2.71432e-05	0.000286087	COL18A1	80781	0.000472902	562	584	409	1261	759	816
1520	ENSG00000240342	1156.9	-0.745837	0.177744	-4.19613	2.71511e-05	0.000286087	RPS2P5	NA	0.000472902	1509	1543	1297	1114	762	717
1521	ENSG00000135048	1143.4	0.712357	0.169774	4.19591	2.71777e-05	0.000286179	TMEM2	23670	0.000473053	933	998	668	1490	1257	1514
1522	ENSG00000132475	2618.49	-0.580772	0.138428	-4.19547	2.72306e-05	0.000286547	H3F3B	100616282	0.000473662	2961	3098	3356	2040	2385	1870
1523	ENSG00000167799	185.367	0.861001	0.205239	4.19512	2.72733e-05	0.000286808	NUDT8	254552	0.000474093	129	145	120	196	249	273
1524	ENSG00000249007	13.2603	3.05636	0.72897	4.1927	2.7565e-05	0.000289686	RP11-510N19.5	NA	0.000478851	5	2	1	15	30	27
1525	ENSG00000082781	2248.18	-0.606536	0.144748	-4.19029	2.78602e-05	0.000292596	ITGB5	3693	0.00048366	2811	2615	2717	2077	1749	1522
1526	ENSG00000144589	168.842	-0.845152	0.20186	-4.18681	2.82897e-05	0.000296912	STK11IP	114790	0.000490794	224	228	198	128	103	131
1527	ENSG00000106263	3466.13	-0.667664	0.159489	-4.18628	2.83569e-05	0.000297423	EIF3B	8662	0.000491639	4473	4531	3758	3243	2559	2232
1528	ENSG00000103035	633.092	-0.656523	0.156851	-4.18564	2.8436e-05	0.000298057	PSMD7	5713	0.000492687	807	716	802	573	460	442
1529	ENSG00000135829	2151.23	-0.628848	0.150274	-4.18468	2.85565e-05	0.000299124	DHX9	1660	0.000494451	2918	2761	2159	1686	1829	1554
1530	ENSG00000101158	667.129	-0.585996	0.140077	-4.18337	2.87224e-05	0.000300598	NELFCD	51497	0.000496888	839	793	770	499	563	538
1531	ENSG00000110958	2712.95	-0.75298	0.179998	-4.18327	2.87348e-05	0.000300598	PTGES3	10728	0.000496888	3694	3254	3268	2258	2379	1425
1532	ENSG00000149679	127.13	-1.20584	0.288272	-4.18301	2.87676e-05	0.000300745	CABLES2	81928	0.000497131	195	228	109	87	89	55
1533	ENSG00000180357	663.462	-0.616659	0.147435	-4.18259	2.88204e-05	0.000301101	ZNF609	23060	0.000497719	805	828	776	593	498	481
1534	ENSG00000242265	993.633	-0.791221	0.189182	-4.18232	2.88553e-05	0.000301269	PEG10	23089	0.000497997	1295	1443	1041	886	753	544
1535	ENSG00000226965	10.9526	3.68568	0.881305	4.18207	2.88872e-05	0.000301406	AC003088.1	105375451	0.000498223	4	0	1	27	14	20
1536	ENSG00000179046	145.213	1.26367	0.302191	4.1817	2.89333e-05	0.00030169	TRIML2	205860	0.000498693	65	102	89	293	112	209
1537	ENSG00000137494	67.9862	1.23733	0.296181	4.17763	2.94566e-05	0.000306946	ANKRD42	338699	0.000507382	43	31	47	80	90	117
1538	ENSG00000140941	1185.97	0.657148	0.157324	4.17704	2.95328e-05	0.000307541	MAP1LC3B	81631	0.000508364	828	850	1084	1265	1523	1566
1539	ENSG00000237187	86.9556	-1.15587	0.276777	-4.17618	2.96449e-05	0.000308507	NR2F1-AS1	441094	0.000509962	98	109	153	44	61	56
1540	ENSG00000213759	20.575	2.78809	0.667789	4.17511	2.97846e-05	0.000309561	UGT2B11	10720	0.000511704	4	1	10	12	47	49
1541	ENSG00000198732	1065.06	0.747042	0.178928	4.17511	2.97848e-05	0.000309561	SMOC1	64093	0.000511704	733	686	967	1066	1417	1521
1542	ENSG00000173744	865.293	-0.716101	0.17153	-4.1748	2.98254e-05	0.000309782	AGFG1	3267	0.000512069	1147	1081	998	799	652	513
1543	ENSG00000138182	181.8	-1.04919	0.251345	-4.17431	2.98896e-05	0.000310248	KIF20B	9585	0.000512839	263	276	195	105	166	84
1544	ENSG00000157657	276.817	-0.691157	0.165636	-4.17275	3.00942e-05	0.000312169	ZNF618	114991	0.000516014	352	343	330	221	203	211
1545	ENSG00000124789	404.537	-0.851047	0.203975	-4.17231	3.01533e-05	0.00031258	NUP153	9972	0.000516693	585	567	409	319	332	215
1546	ENSG00000173175	42.1461	1.94549	0.466308	4.1721	3.018e-05	0.000312654	ADCY5	111	0.000516816	20	9	24	27	86	88
1547	ENSG00000103549	744.985	-0.732101	0.175507	-4.17135	3.02805e-05	0.000313493	RNF40	9810	0.000518203	1032	938	819	681	549	450
1548	ENSG00000158545	657.391	-0.608029	0.145814	-4.1699	3.04735e-05	0.000315286	ZC3H18	124245	0.000521168	799	802	780	584	505	473
1549	ENSG00000178605	488.219	-0.658109	0.157853	-4.16913	3.05763e-05	0.000316146	GTPBP6	8225	0.000522588	646	627	519	387	397	353
1550	ENSG00000092199	6369.44	-0.507971	0.121866	-4.16826	3.06933e-05	0.000317151	HNRNPC	3183	0.00052425	7188	7223	8027	5025	5586	5168
1551	ENSG00000072736	168.23	-0.885185	0.212419	-4.16717	3.08405e-05	0.000318466	NFATC3	4775	0.000526424	233	222	201	146	101	108
1552	ENSG00000137038	536.372	0.663646	0.159283	4.16646	3.0936e-05	0.000319246	TMEM261	90871	0.000527713	463	414	368	631	609	734
1553	ENSG00000170852	239.182	-0.770284	0.18491	-4.16572	3.10366e-05	0.000319923	KBTBD2	25948	0.000528831	315	309	281	185	197	149
1554	ENSG00000142687	647.522	0.63972	0.153569	4.16569	3.10414e-05	0.000319923	KIAA0319L	79932	0.000528831	573	473	473	868	766	733
1555	ENSG00000173473	795.228	-0.786317	0.188805	-4.16469	3.11772e-05	0.000321115	SMARCC1	6599	0.000530803	1049	1077	894	749	566	437
1556	ENSG00000271605	68.5168	1.17622	0.282512	4.16344	3.13489e-05	0.000322676	MILR1	284021	0.000533383	44	42	40	79	112	94
1557	ENSG00000152689	11.5515	3.20241	0.769657	4.16083	3.17089e-05	0.000326172	RASGRP3	25780	0.000539161	2	1	4	22	18	23
1558	ENSG00000100462	488.916	-0.734957	0.176651	-4.16051	3.17535e-05	0.000326421	PRMT5	10419	0.000539573	646	677	509	430	353	319
1559	ENSG00000039123	676.886	-0.642606	0.154502	-4.15922	3.19341e-05	0.000328067	SKIV2L2	23517	0.000542294	879	767	830	543	591	452
1560	ENSG00000160058	250.067	0.781354	0.187929	4.1577	3.21464e-05	0.000329979	BSDC1	55108	0.000545455	168	192	192	311	269	368
1561	ENSG00000060971	453.854	0.649392	0.156198	4.1575	3.2175e-05	0.000329979	ACAA1	30	0.000545455	364	334	362	607	493	564
1562	ENSG00000090512	9.8739	4.28928	1.03171	4.15745	3.2182e-05	0.000329979	FETUB	26998	0.000545455	1	2	0	15	15	27
1563	ENSG00000051341	73.5069	-1.39682	0.336089	-4.1561	3.23733e-05	0.00033154	POLQ	10721	0.000548035	111	146	63	30	49	43
1564	ENSG00000101844	182.871	0.780549	0.187809	4.15608	3.23756e-05	0.00033154	ATG4A	115201	0.000548035	133	139	132	242	216	236
1565	ENSG00000164877	129.58	1.03566	0.249202	4.15591	3.23998e-05	0.000331576	MICALL2	79778	0.000548094	78	94	83	153	138	232
1566	ENSG00000113924	3118.07	0.575999	0.138605	4.15568	3.24321e-05	0.000331694	HGD	3081	0.000548289	2613	2190	2708	3403	4053	3741
1567	ENSG00000123080	242.876	-1.03413	0.248924	-4.1544	3.26149e-05	0.000333241	CDKN2C	1031	0.000550846	370	324	285	94	216	168
1568	ENSG00000076351	158.786	1.01092	0.243341	4.15432	3.26249e-05	0.000333241	SLC46A1	113235	0.000550846	86	144	86	218	178	241
1569	ENSG00000035862	707.117	0.861207	0.207316	4.15408	3.26601e-05	0.000333387	TIMP2	7077	0.000551088	522	519	466	1270	782	685
1570	ENSG00000100983	1131.44	0.566113	0.136307	4.15322	3.27824e-05	0.000334423	GSS	2937	0.0005528	881	939	917	1402	1205	1444
1571	ENSG00000168411	482.516	-0.775002	0.186612	-4.15301	3.28129e-05	0.000334521	RFWD3	55159	0.000552962	617	730	480	393	372	303
1572	ENSG00000078618	1526.1	-0.612412	0.147541	-4.15078	3.31346e-05	0.000337439	NRDC	100313892	0.000557786	1933	1810	1793	1377	1236	1008
1573	ENSG00000111271	285.65	0.70617	0.170131	4.15073	3.31413e-05	0.000337439	ACAD10	80724	0.000557786	220	208	223	349	322	391
1574	ENSG00000159131	894.762	-0.599082	0.144352	-4.15014	3.32275e-05	0.000338102	GART	2618	0.000558881	1022	1188	1024	786	670	678
1575	ENSG00000182944	1782.45	-0.517598	0.124769	-4.14845	3.34736e-05	0.000340389	EWSR1	2130	0.000562662	2044	2204	2048	1386	1486	1526
1576	ENSG00000151849	89.2977	-1.07135	0.258511	-4.14432	3.40828e-05	0.000346364	CENPJ	55835	0.000572539	124	121	118	43	64	67
1577	ENSG00000129422	5238.24	-0.619275	0.149477	-4.14296	3.42856e-05	0.000348205	MTUS1	57509	0.000575582	6773	5662	6601	3866	4897	3631
1578	ENSG00000173218	250.778	-0.796286	0.192293	-4.141	3.45793e-05	0.000350965	VANGL1	81839	0.000580144	341	339	275	194	205	151
1579	ENSG00000169230	1008.92	-0.687616	0.166068	-4.14056	3.46455e-05	0.000351403	PRELID1	27166	0.000580869	1275	1453	1007	868	742	708
1580	ENSG00000198189	323.981	-0.727333	0.175666	-4.14042	3.46664e-05	0.000351403	HSD17B11	51170	0.000580869	400	364	448	213	275	244
1581	ENSG00000175792	840.933	-0.55875	0.134972	-4.13974	3.47696e-05	0.000352227	RUVBL1	8607	0.00058223	962	1067	977	687	703	650
1582	ENSG00000126803	752.599	0.936047	0.226138	4.13927	3.48415e-05	0.000352732	HSPA2	3306	0.000583065	625	624	301	1107	893	966
1583	ENSG00000085733	1820.8	0.60835	0.147016	4.13799	3.50368e-05	0.000354485	CTTN	2017	0.000585963	1431	1628	1268	2347	1938	2312
1584	ENSG00000147509	97.6375	1.04879	0.253495	4.13734	3.51354e-05	0.000355257	RGS20	8601	0.000587239	73	56	62	131	108	156
1585	ENSG00000081041	135.409	3.3566	0.811322	4.1372	3.51575e-05	0.000355257	CXCL2	2920	0.000587239	19	41	12	91	190	460
1586	ENSG00000147459	949.794	0.728303	0.176149	4.13459	3.55597e-05	0.000359094	DOCK5	80005	0.000593582	680	841	624	1405	955	1193
1587	ENSG00000130762	289.996	-0.734139	0.177569	-4.13438	3.55911e-05	0.000359185	ARHGEF16	27237	0.000593732	387	382	317	196	243	215
1588	ENSG00000115464	506.287	-0.752746	0.182144	-4.13271	3.58518e-05	0.000361444	USP34	9736	0.000597466	688	634	584	452	393	287
1589	ENSG00000170734	136.884	0.993473	0.240396	4.13265	3.586e-05	0.000361444	POLH	5429	0.000597466	98	93	83	236	142	169
1590	ENSG00000213903	42.6541	2.00275	0.484662	4.13225	3.59223e-05	0.000361844	LTB4R	1241	0.000598127	17	17	17	26	52	127
1591	ENSG00000164211	154.123	0.852522	0.206344	4.13156	3.60302e-05	0.000362702	STARD4	134429	0.000599546	126	109	95	199	190	207
1592	ENSG00000165655	158.961	0.999376	0.24204	4.12898	3.64381e-05	0.000366578	ZNF503	84858	0.000605953	106	107	105	146	215	275
1593	ENSG00000124207	1397.91	-0.699308	0.169386	-4.12848	3.65171e-05	0.000367143	CSE1L	1434	0.000606886	1879	1850	1461	1079	1259	859
1594	ENSG00000023318	512.311	0.700072	0.169645	4.12668	3.68036e-05	0.000369791	ERP44	23071	0.000611264	410	321	440	600	711	592
1595	ENSG00000124767	908.675	-0.631015	0.153111	-4.12129	3.76749e-05	0.000378308	GLO1	2739	0.000625342	1046	1098	1169	723	817	599
1596	ENSG00000170927	15.2412	2.65754	0.645143	4.11931	3.80007e-05	0.000381341	PKHD1	5314	0.000630355	4	4	4	19	19	41
1597	ENSG00000177508	59.7267	-1.25404	0.304478	-4.11865	3.81101e-05	0.000382198	IRX3	79191	0.000631773	94	78	80	26	39	41
1598	ENSG00000267680	22.8245	2.02559	0.491909	4.11782	3.82478e-05	0.00038334	ZNF224	7767	0.00063366	10	6	11	28	35	47
1599	ENSG00000174165	213.721	0.821658	0.199554	4.11747	3.83061e-05	0.000383684	ZDHHC24	254359	0.000634228	137	188	139	296	245	278
1600	ENSG00000111696	76.9225	1.25225	0.304161	4.11707	3.83721e-05	0.000384105	NT5DC3	51559	0.000634925	34	66	37	99	95	130
1601	ENSG00000129472	125.557	0.903689	0.219541	4.11627	3.85052e-05	0.000385196	RAB2B	84932	0.000636728	94	87	81	143	175	173
1602	ENSG00000167005	618.056	-0.662668	0.161018	-4.1155	3.86336e-05	0.00038624	NUDT21	11051	0.000638453	742	775	756	509	539	387
1603	ENSG00000165757	31.4156	2.10078	0.510589	4.11442	3.88157e-05	0.000387782	KIAA1462	57608	0.000641004	11	15	10	93	28	32
1604	ENSG00000130640	965.139	-0.674337	0.163901	-4.1143	3.88364e-05	0.000387782	TUBGCP2	10844	0.000641004	1255	1190	1115	919	660	652
1605	ENSG00000275700	1118	-0.624748	0.151883	-4.11334	3.89968e-05	0.000389142	AATF	26574	0.000643251	1276	1312	1482	985	915	739
1606	ENSG00000106244	1663.38	-0.502192	0.122114	-4.11248	3.91437e-05	0.000390365	PDAP1	11333	0.000645272	1930	1907	2013	1408	1391	1331
1607	ENSG00000135632	587.188	-0.583398	0.141891	-4.11159	3.92937e-05	0.000391616	SMYD5	10322	0.000647341	673	745	695	450	486	474
1608	ENSG00000161010	65.2528	1.35849	0.330758	4.10721	4.00473e-05	0.000398879	C5orf45	51149	0.000659346	36	39	35	77	67	138
1609	ENSG00000185361	59.3302	-1.40197	0.341369	-4.10692	4.00972e-05	0.000399128	TNFAIP8L1	126282	0.000659758	86	112	61	30	44	24
1610	ENSG00000188811	59.8187	1.20805	0.29419	4.10636	4.01935e-05	0.000399838	NHLRC3	387921	0.000660931	41	35	32	74	89	88
1611	ENSG00000135414	97.2057	1.07973	0.262966	4.10596	4.02638e-05	0.000400279	GDF11	10220	0.00066166	53	83	51	140	140	116
1612	ENSG00000275832	749.838	0.813725	0.198198	4.10562	4.03237e-05	0.000400279	ARHGAP23	57636	0.00066166	557	675	399	1156	843	869
1613	ENSG00000080345	251.651	-0.740231	0.180301	-4.10554	4.03371e-05	0.000400279	RIF1	55183	0.00066166	340	324	281	187	208	171
1614	ENSG00000230453	52.4788	-1.28683	0.313437	-4.10554	4.03378e-05	0.000400279	ANKRD18B	441459	0.00066166	70	72	81	25	35	32
1615	ENSG00000103227	237.554	0.820052	0.199858	4.10318	4.0751e-05	0.000404129	LMF1	64788	0.000668024	178	134	204	297	337	276
1616	ENSG00000166415	290.36	0.717144	0.174848	4.10153	4.10427e-05	0.000406769	WDR72	256764	0.000672389	216	215	228	307	384	391
1617	ENSG00000097021	652.406	-0.706511	0.172264	-4.10133	4.10789e-05	0.000406876	ACOT7	11332	0.000672566	812	799	816	622	458	408
1618	ENSG00000127564	178.908	-2.32542	0.567075	-4.10073	4.11843e-05	0.000407668	PKMYT1	9088	0.000673874	275	421	199	76	78	25
1619	ENSG00000136504	429.742	-0.747234	0.182343	-4.09795	4.1683e-05	0.000412351	KAT7	11143	0.000681615	534	489	592	366	350	247
1620	ENSG00000152556	756.765	0.566005	0.138149	4.09708	4.184e-05	0.000413648	PFKM	5213	0.000683759	619	612	599	850	878	982
1621	ENSG00000123427	86.7983	1.09021	0.266138	4.09639	4.19638e-05	0.000414616	METTL21B	25895	0.000685359	49	59	59	92	140	123
1622	ENSG00000133026	573.95	-0.715053	0.174724	-4.09247	4.26802e-05	0.000421434	MYH10	4628	0.00069663	822	682	635	449	501	355
1623	ENSG00000105254	1074.26	-0.544191	0.132995	-4.09181	4.28022e-05	0.000422379	TBCB	1155	0.000698191	1178	1344	1302	832	890	900
1624	ENSG00000206530	12.0997	3.55202	0.868986	4.08755	4.35956e-05	0.000429943	CFAP44	55779	0.000710695	4	1	1	8	20	39
1625	ENSG00000197903	285.752	0.739759	0.18099	4.08729	4.36446e-05	0.000430161	HIST1H2BK	85236	0.000711056	208	220	215	418	302	353
1626	ENSG00000189057	139.113	-1.41679	0.34688	-4.08438	4.41943e-05	0.000435311	FAM111B	374393	0.000719569	264	223	120	81	113	34
1627	ENSG00000275880	27.4161	1.99067	0.487632	4.08233	4.45867e-05	0.00043886	RP11-90L1.8	NA	0.000725434	20	6	7	40	56	36
1628	ENSG00000101216	115.164	-0.960262	0.235231	-4.08221	4.46094e-05	0.00043886	GMEB2	26205	0.000725434	153	177	125	85	77	73
1629	ENSG00000149269	328.755	-0.818734	0.200599	-4.08144	4.47579e-05	0.000440051	PAK1	5058	0.000727403	410	417	433	307	230	176
1630	ENSG00000030066	500.665	-0.603392	0.147897	-4.07983	4.50692e-05	0.000442839	NUP160	23279	0.000732013	589	630	592	369	396	427
1631	ENSG00000263934	36.2154	2.24624	0.550752	4.07849	4.53298e-05	0.000444917	SNORD3A	780851	0.000735446	10	15	13	16	49	115
1632	ENSG00000024422	2474.68	0.624923	0.153225	4.07845	4.53361e-05	0.000444917	EHD2	30846	0.000735446	2103	1855	1883	3602	2851	2554
1633	ENSG00000261236	1125.97	-0.733442	0.179926	-4.07636	4.57461e-05	0.000448665	BOP1	102465906	0.000741642	1344	1707	1168	1022	792	722
1634	ENSG00000111247	51.86	-1.37409	0.337141	-4.07572	4.58728e-05	0.000449632	RAD51AP1	10635	0.000743241	76	75	73	21	42	24
1635	ENSG00000108561	3822.08	-0.490044	0.120255	-4.07503	4.60087e-05	0.000450688	C1QBP	708	0.000744986	4196	4672	4527	3046	3280	3211
1636	ENSG00000129534	154.249	-0.933092	0.228995	-4.07473	4.60678e-05	0.000450991	MIS18BP1	55320	0.000745487	225	197	185	88	139	92
1637	ENSG00000179832	218.353	0.793885	0.194896	4.07338	4.6335e-05	0.00045333	MROH1	727957	0.000749354	175	149	155	321	233	277
1638	ENSG00000100417	177.782	-0.801304	0.196774	-4.07221	4.65688e-05	0.000455339	PMM1	5372	0.000752675	216	205	257	130	135	124
1639	ENSG00000186106	105.985	0.980815	0.240887	4.07169	4.6674e-05	0.00045609	ANKRD46	157567	0.000753915	79	72	63	165	123	134
1640	ENSG00000154845	575.82	-0.614306	0.150879	-4.07152	4.67073e-05	0.000456136	PPP4R1	9989	0.000753992	773	684	632	461	479	426
1641	ENSG00000141101	440.319	-0.656441	0.16126	-4.07071	4.68707e-05	0.000457453	NOB1	28987	0.00075617	492	565	560	383	339	303
1642	ENSG00000198700	995.861	-0.605899	0.148921	-4.0686	4.72955e-05	0.000461319	IPO9	55705	0.000762558	1280	1285	1041	749	874	747
1643	ENSG00000089063	1925.66	0.567863	0.139627	4.06699	4.76241e-05	0.000464241	TMEM230	29058	0.00076739	1610	1368	1677	2121	2513	2266
1644	ENSG00000178719	1632.93	0.516434	0.127005	4.06624	4.7777e-05	0.000465448	GRINA	2907	0.000769385	1328	1405	1299	2022	1952	1792
1645	ENSG00000175221	343.336	-0.707009	0.173885	-4.06595	4.78362e-05	0.000465741	MED16	10025	0.00076987	458	463	357	281	257	244
1646	ENSG00000185745	69.4883	1.18578	0.291665	4.06556	4.79166e-05	0.000466241	IFIT1	3434	0.000770695	52	38	37	77	101	113
1647	ENSG00000109079	1316.92	0.633242	0.155858	4.06294	4.8459e-05	0.000471232	TNFAIP1	7126	0.000778945	1085	1140	872	1813	1419	1572
1648	ENSG00000143493	372.893	-0.649261	0.159873	-4.0611	4.88425e-05	0.000474673	INTS7	25896	0.000784634	429	454	483	299	309	262
1649	ENSG00000186283	326.636	-0.686085	0.169028	-4.059	4.92834e-05	0.000478667	TOR3A	64222	0.000791236	357	451	401	261	236	254
1650	ENSG00000159140	1508.47	-0.588984	0.14513	-4.05833	4.94256e-05	0.000479758	SON	102465248	0.000793039	2013	1827	1596	1319	1207	1088
1651	ENSG00000153558	98.7958	1.00669	0.248096	4.05767	4.95653e-05	0.000480822	FBXL2	25827	0.000794798	65	56	76	123	119	154
1652	ENSG00000174282	589.334	0.615077	0.151621	4.05669	4.97738e-05	0.000482553	ZBTB4	57659	0.000797658	465	454	478	813	677	650
1653	ENSG00000101343	381.05	-0.67961	0.167563	-4.05584	4.99536e-05	0.000484003	CRNKL1	51340	0.000800056	456	434	517	271	335	274
1654	ENSG00000007384	140.244	0.934641	0.230634	4.05248	5.06778e-05	0.000490723	RHBDF1	64285	0.000811164	89	119	81	196	153	204
1655	ENSG00000107798	790.972	0.632315	0.156066	4.05158	5.08724e-05	0.000492309	LIPA	3988	0.000813786	684	610	567	1100	945	840
1656	ENSG00000110080	1059.52	-0.553454	0.136663	-4.04978	5.12654e-05	0.000495814	ST3GAL4	6484	0.000819579	1263	1175	1342	786	894	897
1657	ENSG00000213930	88.8718	1.15008	0.284201	4.04669	5.19459e-05	0.000502092	GALT	2592	0.000829956	60	44	62	93	111	163
1658	ENSG00000175334	2465.95	-0.556051	0.137414	-4.04653	5.19815e-05	0.000502133	BANF1	8815	0.000830024	2738	3014	3055	1727	2114	2149
1659	ENSG00000204262	745.838	0.623049	0.153989	4.04607	5.20851e-05	0.00050283	COL5A2	1290	0.000831177	608	580	574	1064	826	823
1660	ENSG00000185591	599.61	-0.599118	0.148136	-4.04438	5.24617e-05	0.000506161	SP1	6667	0.000836683	776	691	699	448	526	457
1661	ENSG00000130714	117.654	0.933995	0.230977	4.04368	5.2619e-05	0.000507373	POMT1	10585	0.000838686	88	67	87	141	174	149
1662	ENSG00000131351	59.0922	-1.3924	0.344398	-4.04299	5.27748e-05	0.00050837	HAUS8	93323	0.000840335	91	106	60	28	47	24
1663	ENSG00000197977	76.4152	-1.12501	0.278266	-4.04294	5.2786e-05	0.00050837	ELOVL2	54898	0.000840335	95	113	107	42	62	40
1664	ENSG00000204253	848.05	-0.545836	0.135065	-4.04129	5.31579e-05	0.000511645	HNRNPCP2	NA	0.000845748	953	1008	1059	655	721	692
1665	ENSG00000120705	2129.02	-0.544506	0.134823	-4.03867	5.3754e-05	0.000517072	ETF1	2107	0.000854718	2655	2561	2363	1912	1735	1549
1666	ENSG00000162086	73.2048	1.14253	0.282923	4.03831	5.38378e-05	0.000517567	ZNF75A	7627	0.000855537	48	34	54	97	89	116
1667	ENSG00000184949	5.63957	5.9893	1.48331	4.0378	5.39552e-05	0.000518384	FAM227A	646851	0.000856888	0	0	0	5	5	24
1668	ENSG00000116741	356.121	1.08728	0.269329	4.03702	5.41347e-05	0.000519797	RGS2	5997	0.000859223	183	224	278	263	516	674
1669	ENSG00000203722	99.5472	0.996907	0.246974	4.03648	5.42593e-05	0.000520651	RAET1G	353091	0.000860635	80	52	67	127	137	134
1670	ENSG00000079819	318.641	-0.852853	0.211293	-4.03635	5.42886e-05	0.000520651	EPB41L2	2037	0.000860635	438	448	344	298	209	174
1671	ENSG00000144747	199.89	0.784613	0.194395	4.03617	5.43305e-05	0.000520741	TMF1	7110	0.000860783	168	125	147	258	232	270
1672	ENSG00000169499	87.1297	1.04368	0.258633	4.03536	5.45195e-05	0.00052224	PLEKHA2	59339	0.000863261	56	56	59	94	138	120
1673	ENSG00000141934	904.525	-0.555315	0.137651	-4.03421	5.47853e-05	0.000524472	PLPP2	8612	0.000866951	1166	1050	1013	696	777	724
1674	ENSG00000184840	3045.76	0.486073	0.120506	4.03361	5.49265e-05	0.00052551	TMED9	54732	0.000868666	2604	2591	2417	3501	3420	3741
1675	ENSG00000116161	1197.64	-0.568446	0.14097	-4.03238	5.52154e-05	0.000527958	CACYBP	27101	0.000872714	1420	1411	1461	902	1108	884
1676	ENSG00000106688	48.6836	1.341	0.332655	4.03122	5.54885e-05	0.000530253	SLC1A1	6505	0.000876507	19	32	32	69	67	74
1677	ENSG00000173614	77.3946	1.10972	0.275405	4.02942	5.59155e-05	0.000534014	NMNAT1	64802	0.000882725	56	36	54	109	93	115
1678	ENSG00000099821	845.356	-0.583163	0.144761	-4.02844	5.61475e-05	0.000535911	POLRMT	5442	0.00088586	958	1128	955	735	659	636
1679	ENSG00000228314	11.1006	3.37359	0.83864	4.0227	5.75358e-05	0.000548835	CYP4F29P	54055	0.000907223	1	1	4	13	17	31
1680	ENSG00000077152	261.189	-0.871478	0.216785	-4.02002	5.81935e-05	0.000554778	UBE2T	29089	0.000917047	344	337	332	125	238	191
1681	ENSG00000142677	45.1635	-1.48847	0.370287	-4.01977	5.82547e-05	0.000555031	IL22RA1	58985	0.000917464	71	71	58	16	37	18
1682	ENSG00000162065	89.5735	0.990191	0.246447	4.01786	5.87297e-05	0.000559224	TBC1D24	57465	0.000924395	54	61	66	115	129	113
1683	ENSG00000175130	1256.73	-0.555448	0.138274	-4.01699	5.89452e-05	0.000560943	MARCKSL1	65108	0.000927237	1493	1603	1391	1027	1107	919
1684	ENSG00000120318	75.896	-1.04537	0.260254	-4.01673	5.90111e-05	0.000561236	ARAP3	64411	0.000927721	106	105	96	51	50	48
1685	ENSG00000041880	86.2947	0.992393	0.24713	4.01567	5.9278e-05	0.00056344	PARP3	10039	0.000931365	62	53	59	110	113	121
1686	ENSG00000007541	203.255	0.816753	0.203438	4.01475	5.95085e-05	0.000565295	PIGQ	9091	0.000934432	152	175	114	244	272	262
1687	ENSG00000006831	996.425	-0.541632	0.135009	-4.01182	6.02521e-05	0.00057202	ADIPOR2	79602	0.000945548	1196	1183	1165	880	815	740
1688	ENSG00000113712	494.751	-0.679787	0.169455	-4.01162	6.03047e-05	0.00057218	CSNK1A1	1452	0.000945812	589	653	586	461	337	342
1689	ENSG00000164181	217.434	0.765647	0.19087	4.01134	6.03742e-05	0.0005725	ELOVL7	79993	0.000946342	166	159	158	312	280	230
1690	ENSG00000112984	420.014	-1.81585	0.4528	-4.01026	6.06524e-05	0.000574687	KIF20A	10112	0.000949956	734	709	519	115	303	139
1691	ENSG00000076928	656.5	-0.579738	0.144567	-4.01016	6.06765e-05	0.000574687	ARHGEF1	100505585	0.000949956	743	876	740	531	521	527
1692	ENSG00000113649	419.773	-0.629058	0.156909	-4.00905	6.09641e-05	0.000577069	TCERG1	10915	0.000953893	555	517	458	315	342	332
1693	ENSG00000065135	506.769	-0.659227	0.164466	-4.0083	6.11584e-05	0.000578566	GNAI3	406974	0.000956368	649	644	569	394	453	332
1694	ENSG00000127914	396.174	0.624192	0.155751	4.00764	6.13293e-05	0.00057984	AKAP9	10142	0.000958475	330	285	320	466	467	508
1695	ENSG00000196689	11.9461	3.23625	0.808064	4.00494	6.2033e-05	0.000586147	TRPV1	7442	0.000968901	0	3	4	15	16	34
1696	ENSG00000072210	2011.51	-0.505891	0.126334	-4.00438	6.21805e-05	0.000587195	ALDH3A2	224	0.000970632	2393	2211	2478	1713	1716	1559
1697	ENSG00000124145	298.543	0.731015	0.182602	4.00332	6.24593e-05	0.00058948	SDC4	6385	0.000974409	197	266	211	353	348	416
1698	ENSG00000184220	330.431	-0.728313	0.181952	-4.00278	6.26027e-05	0.000590485	CMSS1	84319	0.000976071	404	397	435	243	301	203
1699	ENSG00000235750	121.032	-0.895778	0.223825	-4.00214	6.27712e-05	0.000591481	KIAA0040	9674	0.000977717	166	153	153	74	99	82
1700	ENSG00000075643	357.016	-0.642749	0.160603	-4.0021	6.27821e-05	0.000591481	MOCOS	55034	0.000977717	410	446	449	258	273	305
1701	ENSG00000160957	169.461	-1.00531	0.251236	-4.00146	6.29523e-05	0.000592736	RECQL4	9401	0.000979792	236	296	146	110	105	123
1702	ENSG00000107537	384.355	0.797814	0.199507	3.99893	6.36291e-05	0.000598756	PHYH	5264	0.000989743	263	225	354	401	512	551
1703	ENSG00000111799	341.529	0.654622	0.163885	3.9944	6.48584e-05	0.000609966	COL12A1	1303	0.00100827	296	237	262	418	428	408
1704	ENSG00000108578	542.095	-0.580006	0.145216	-3.99409	6.49432e-05	0.000610405	BLMH	642	0.001009	635	659	655	472	409	422
1705	ENSG00000138750	160.053	-0.799797	0.200397	-3.99106	6.57784e-05	0.000617829	NUP54	53371	0.00102127	189	206	215	105	127	118
1706	ENSG00000125124	145.398	0.954779	0.239239	3.99089	6.58249e-05	0.000617829	BBS2	583	0.00102127	94	89	114	147	183	245
1707	ENSG00000052841	738.935	0.638359	0.159957	3.99081	6.58488e-05	0.000617829	TTC17	55761	0.00102127	642	477	615	815	966	919
1708	ENSG00000075399	101.052	0.961475	0.240999	3.98954	6.62015e-05	0.000620751	VPS9D1	9605	0.0010261	66	65	75	114	133	153
1709	ENSG00000119915	48.6485	1.49674	0.375177	3.98941	6.62378e-05	0.000620751	ELOVL3	83401	0.0010261	22	28	26	51	55	110
1710	ENSG00000105778	499.554	-0.573093	0.143683	-3.98858	6.647e-05	0.000622563	AVL9	23080	0.0010291	602	601	589	413	410	382
1711	ENSG00000213260	144.607	-0.874476	0.21928	-3.98795	6.6647e-05	0.000623792	YWHAZP5	NA	0.00103113	210	191	160	114	106	86
1712	ENSG00000139289	318.985	0.688167	0.172567	3.98783	6.66791e-05	0.000623792	PHLDA1	22822	0.00103113	231	222	281	418	359	404
1713	ENSG00000128408	25.3407	-1.96562	0.492969	-3.9873	6.68288e-05	0.000624827	RIBC2	26150	0.00103284	37	41	43	3	14	14
1714	ENSG00000135677	1561	0.533401	0.133789	3.98687	6.695e-05	0.000625596	GNS	2799	0.00103411	1351	1159	1317	1958	1868	1712
1715	ENSG00000196363	285.639	-0.704133	0.176766	-3.98343	6.79289e-05	0.000634373	WDR5	11091	0.00104862	362	392	307	231	222	199
1716	ENSG00000198910	283.469	0.845389	0.212282	3.98238	6.82274e-05	0.000636489	L1CAM	3897	0.00105212	269	177	161	415	354	325
1717	ENSG00000136982	78.3702	-1.32341	0.332319	-3.98236	6.8235e-05	0.000636489	DSCC1	79075	0.00105212	123	133	79	29	69	37
1718	ENSG00000249936	705.834	-0.615918	0.154685	-3.98176	6.84057e-05	0.00063771	RAC1P2	NA	0.00105413	804	867	892	642	552	479
1719	ENSG00000101407	437.104	-0.590865	0.148576	-3.97686	6.98319e-05	0.000650627	TTI1	9675	0.00107549	522	542	512	366	346	334
1720	ENSG00000151150	132.344	-0.975051	0.245214	-3.97633	6.99874e-05	0.000651697	ANK3	288	0.00107725	195	131	199	96	101	71
1721	ENSG00000138587	42.3418	-1.47848	0.371895	-3.97554	7.02204e-05	0.000653486	MNS1	55329	0.00108021	58	57	72	13	31	24
1722	ENSG00000005884	2870.77	0.714478	0.179802	3.9737	7.07656e-05	0.000658009	ITGA3	3675	0.00108769	2307	2316	1899	4631	2835	3236
1723	ENSG00000187554	12.0462	3.10149	0.780519	3.97362	7.07885e-05	0.000658009	TLR5	7100	0.00108769	5	2	0	14	25	26
1724	ENSG00000144959	522.035	0.650621	0.16378	3.97252	7.1115e-05	0.00066066	NCEH1	57552	0.00109207	439	418	362	737	606	571
1725	ENSG00000113356	65.8063	-1.37998	0.347492	-3.97126	7.14932e-05	0.000663652	POLR3G	10622	0.00109702	94	121	71	48	43	18
1726	ENSG00000188986	391.661	-0.68581	0.172697	-3.97117	7.15199e-05	0.000663652	NELFB	25920	0.00109702	497	554	398	293	317	291
1727	ENSG00000119969	151.699	-0.8883	0.223717	-3.97064	7.16791e-05	0.000664744	HELLS	3070	0.00109882	206	231	153	99	118	102
1728	ENSG00000137770	89.1928	-1.11554	0.281029	-3.96949	7.2028e-05	0.000667593	CTDSPL2	51496	0.00110353	123	140	103	70	62	37
1729	ENSG00000135452	287.115	0.749888	0.188938	3.96895	7.21886e-05	0.000668694	TSPAN31	6302	0.00110535	233	164	246	353	369	359
1730	ENSG00000119335	2752.47	-0.594858	0.149897	-3.96844	7.23444e-05	0.000669727	SET	6418	0.00110706	3162	3483	3290	2144	2600	1834
1731	ENSG00000137731	72.9888	1.74777	0.440431	3.96831	7.23837e-05	0.000669727	FXYD2	486	0.00110706	33	29	38	30	132	175
1732	ENSG00000151366	102.636	0.95296	0.240185	3.96761	7.25979e-05	0.000671321	NDUFC2	4718	0.00110969	77	57	76	141	142	123
1733	ENSG00000160094	122.398	-0.92085	0.232111	-3.96729	7.26955e-05	0.000671836	ZNF362	149076	0.00111054	134	184	162	82	96	76
1734	ENSG00000113456	190.59	-0.735557	0.185429	-3.9668	7.28454e-05	0.000672833	RAD1	5810	0.00111219	244	233	236	134	153	142
1735	ENSG00000273230	33.8313	1.53106	0.385982	3.96666	7.2888e-05	0.000672838	RP11-1246C19.1	NA	0.0011122	14	23	15	48	48	55
1736	ENSG00000103021	57.2677	1.22619	0.309243	3.96512	7.33583e-05	0.000676558	CCDC113	29070	0.00111835	28	34	41	78	94	69
1737	ENSG00000159167	222.291	0.747252	0.188459	3.96507	7.33755e-05	0.000676558	STC1	6781	0.00111835	146	161	191	297	284	254
1738	ENSG00000140939	261.495	0.760706	0.191866	3.96478	7.34623e-05	0.000676969	NOL3	8996	0.00111903	185	219	179	269	342	376
1739	ENSG00000069248	345.013	-0.616406	0.155533	-3.96319	7.39563e-05	0.00068113	NUP133	55746	0.00112591	417	417	420	280	276	260
1740	ENSG00000108852	26.5403	-1.99885	0.504416	-3.9627	7.41065e-05	0.000682121	MPP2	4355	0.00112754	46	52	30	12	17	3
1741	ENSG00000178172	17.1859	2.52422	0.637086	3.96214	7.42812e-05	0.000683224	SPINK6	404203	0.00112937	6	8	1	16	42	30
1742	ENSG00000148308	400.98	-0.615984	0.155475	-3.96195	7.43398e-05	0.000683224	GTF3C5	9328	0.00112937	509	502	445	333	316	301
1743	ENSG00000102882	486.056	-0.658929	0.166316	-3.9619	7.43543e-05	0.000683224	MAPK3	5595	0.00112937	612	587	586	419	409	303
1744	ENSG00000117419	502.025	-0.565674	0.142808	-3.96107	7.46138e-05	0.000685215	ERI3	79033	0.00113266	593	585	619	400	410	405
1745	ENSG00000050438	37.5232	-1.69717	0.428513	-3.9606	7.47625e-05	0.000686187	SLC4A8	9498	0.00113426	73	37	62	27	17	9
1746	ENSG00000100138	1003.37	-0.644945	0.162852	-3.96032	7.48495e-05	0.000686592	SNU13	4809	0.00113493	1162	1249	1262	966	716	666
1747	ENSG00000119596	858.02	-0.628115	0.158641	-3.95935	7.51525e-05	0.000688976	YLPM1	56252	0.00113888	1113	1103	910	769	676	578
1748	ENSG00000163482	64.9304	1.30514	0.329739	3.95808	7.55541e-05	0.000692262	STK36	27148	0.00114431	35	33	44	66	78	133
1749	ENSG00000167258	562.637	-0.737131	0.186252	-3.95771	7.5672e-05	0.000692946	CDK12	51755	0.00114544	751	750	609	528	406	332
1750	ENSG00000107819	276.604	0.711379	0.179757	3.95744	7.57563e-05	0.000693321	SFXN3	81855	0.00114606	228	224	178	343	314	374
1751	ENSG00000113328	1183.85	0.710013	0.179422	3.95722	7.58285e-05	0.000693586	CCNG1	900	0.0011465	987	779	928	1812	1465	1131
1752	ENSG00000088038	617.687	-0.625108	0.158065	-3.95476	7.6612e-05	0.000700352	CNOT3	4849	0.00115768	732	794	723	573	449	436
1753	ENSG00000125735	27.9101	4.86171	1.22944	3.95441	7.67243e-05	0.000700396	TNFSF14	8740	0.00115775	4	1	0	16	50	96
1754	ENSG00000100206	11.6058	-2.90774	0.735319	-3.95439	7.67314e-05	0.000700396	DMC1	11144	0.00115775	23	17	22	3	2	3
1755	ENSG00000164405	2286.68	0.662975	0.167658	3.95433	7.67479e-05	0.000700396	UQCRQ	27089	0.00115775	1669	1628	2014	2318	2629	3461
1756	ENSG00000135968	208.047	0.73219	0.185197	3.95357	7.69929e-05	0.000702231	GCC2	9648	0.00116079	170	143	156	282	248	249
1757	ENSG00000104343	83.4145	0.993631	0.25138	3.9527	7.72733e-05	0.000704388	UBE2W	55284	0.00116435	60	53	54	116	115	101
1758	ENSG00000075826	12.8173	3.59098	0.908664	3.95193	7.75235e-05	0.000706266	SEC31B	25956	0.00116746	0	3	3	8	13	50
1759	ENSG00000137486	714.815	-0.850701	0.215338	-3.95055	7.79728e-05	0.000709956	ARRB1	408	0.00117356	1022	888	849	730	420	379
1760	ENSG00000130706	620.669	-0.582718	0.147522	-3.95003	7.81415e-05	0.000711088	ADRM1	11047	0.00117543	707	815	712	456	522	513
1761	ENSG00000142039	446.325	-0.642438	0.162695	-3.94874	7.85641e-05	0.000714155	CCDC97	90324	0.0011805	504	625	504	377	327	341
1762	ENSG00000102174	13.6538	2.73339	0.69222	3.94873	7.85678e-05	0.000714155	PHEX	5251	0.0011805	3	2	6	23	34	14
1763	ENSG00000133321	53.1142	1.44211	0.365258	3.94821	7.87391e-05	0.000715307	RARRES3	5920	0.0011824	30	22	34	113	50	70
1764	ENSG00000112312	235.19	-0.873772	0.221345	-3.94755	7.89544e-05	0.000716856	GMNN	51053	0.00118496	342	336	234	126	201	171
1765	ENSG00000196550	22.4674	-1.94353	0.492669	-3.94491	7.98291e-05	0.000724387	FAM72A	729533	0.00119741	38	28	40	7	14	7
1766	ENSG00000117305	212.118	0.829632	0.210328	3.94446	7.998e-05	0.000725345	HMGCL	3155	0.00119899	134	127	197	248	273	293
1767	ENSG00000182013	77.2315	1.13717	0.288398	3.94305	8.04534e-05	0.000729011	PNMAL1	55228	0.00120505	36	54	56	88	100	131
1768	ENSG00000186897	10.8154	-3.54298	0.898554	-3.94298	8.04753e-05	0.000729011	C1QL4	338761	0.00120505	15	34	10	1	1	3
1769	ENSG00000148335	225.07	-0.731226	0.185637	-3.939	8.1821e-05	0.000740485	NTMT1	28989	0.00122402	256	324	263	166	165	176
1770	ENSG00000239306	546.875	-0.906988	0.230261	-3.93896	8.18343e-05	0.000740485	RBM14	10432	0.00122402	775	931	433	363	434	344
1771	ENSG00000180543	54.75	1.46776	0.372708	3.9381	8.21299e-05	0.00074274	TSPYL5	85453	0.00122775	37	20	31	45	93	103
1772	ENSG00000134590	1169.11	0.53314	0.135387	3.9379	8.2198e-05	0.000742937	FAM127A	8933	0.00122807	1003	941	922	1525	1329	1294
1773	ENSG00000100201	972.76	0.78673	0.199806	3.93747	8.23469e-05	0.000743862	DDX17	10521	0.0012296	688	891	562	1021	1104	1570
1774	ENSG00000134153	1304.11	0.584756	0.148536	3.9368	8.25768e-05	0.000745519	EMC7	56851	0.00123234	1095	900	1135	1387	1683	1624
1775	ENSG00000134815	436.897	-0.590115	0.149937	-3.93574	8.29407e-05	0.000748382	DHX34	9704	0.00123707	544	542	488	340	357	349
1776	ENSG00000163728	87.9798	1.06168	0.269799	3.9351	8.3162e-05	0.000749956	TTC14	151613	0.00123968	74	43	53	126	105	126
1777	ENSG00000158109	351.64	0.76274	0.19384	3.9349	8.32315e-05	0.000750117	TPRG1L	127262	0.00123994	288	289	205	525	418	384
1778	ENSG00000125246	128.53	1.04971	0.266778	3.93478	8.32735e-05	0.000750117	CLYBL	171425	0.00123994	96	53	102	138	177	205
1779	ENSG00000040608	54.1062	-1.25072	0.317943	-3.93378	8.36198e-05	0.000752814	RTN4R	65078	0.0012444	79	81	68	42	29	26
1780	ENSG00000161547	707.861	-0.72178	0.183551	-3.93232	8.41291e-05	0.000756973	SRSF2	693221	0.00125127	884	990	769	400	622	582
1781	ENSG00000139726	881.927	-0.589843	0.150008	-3.93209	8.42114e-05	0.000757288	DENR	8562	0.0012518	1097	1067	1016	781	740	591
1782	ENSG00000105290	1099.82	0.835987	0.212656	3.93116	8.45358e-05	0.000759779	APLP1	333	0.00125591	758	716	897	1959	976	1294
1783	ENSG00000236287	152.479	0.803514	0.204432	3.93047	8.47815e-05	0.000761559	ZBED5	58486	0.00125886	114	108	111	170	213	199
1784	ENSG00000230650	36.0772	1.70389	0.433549	3.93009	8.49156e-05	0.00076197	AC112229.1	NA	0.00125953	10	18	24	38	47	81
1785	ENSG00000169894	228.822	0.944711	0.24038	3.93007	8.49223e-05	0.00076197	MUC3A	4584	0.00125953	176	137	156	401	304	199
1786	ENSG00000226976	2013.41	0.819843	0.208627	3.92971	8.50477e-05	0.000762667	COX6A1P2	NA	0.00126069	1338	1237	1794	1856	2401	3454
1787	ENSG00000274827	9.18487	3.72992	0.949353	3.9289	8.53337e-05	0.000764804	LINC01297	NA	0.00126422	1	2	1	14	13	25
1788	ENSG00000105810	351.25	0.756388	0.192721	3.92478	8.68077e-05	0.000777502	CDK6	1021	0.00128521	259	306	219	536	401	386
1789	ENSG00000204592	564.691	0.574426	0.146363	3.92467	8.68476e-05	0.000777502	HLA-E	3133	0.00128521	461	415	485	713	661	653
1790	ENSG00000223705	105.706	1.19008	0.303317	3.92357	8.72477e-05	0.000780648	NSUN5P1	155400	0.00129041	62	82	48	96	136	209
1791	ENSG00000178966	55.6521	-1.27002	0.323774	-3.92254	8.76188e-05	0.00078353	RMI1	80010	0.00129517	81	75	79	27	47	25
1792	ENSG00000276180	185.329	0.842221	0.214744	3.92198	8.78255e-05	0.000784881	HIST1H4I	8294	0.00129741	137	111	150	289	220	204
1793	ENSG00000129128	356.468	0.656552	0.167408	3.92186	8.78679e-05	0.000784881	SPCS3	60559	0.00129741	292	268	270	382	494	433
1794	ENSG00000104490	197.249	0.927108	0.236426	3.92135	8.80556e-05	0.00078612	NCALD	83988	0.00129945	167	106	135	189	312	275
1795	ENSG00000235036	74.2227	-1.09399	0.279006	-3.92102	8.81759e-05	0.000786755	RP5-1099D15.1	NA	0.0013005	94	112	98	39	60	43
1796	ENSG00000126067	1335.43	-0.50527	0.12887	-3.92076	8.82701e-05	0.000787157	PSMB2	5690	0.00130117	1584	1595	1522	1139	1156	1018
1797	ENSG00000096006	51.8123	1.56878	0.400162	3.92037	8.84127e-05	0.00078799	CRISP3	10321	0.00130255	28	14	37	43	99	91
1798	ENSG00000159596	133.495	0.900122	0.229685	3.91894	8.89411e-05	0.000792258	TMEM69	51249	0.0013096	94	92	94	142	163	216
1799	ENSG00000145919	288.322	-0.679355	0.173537	-3.91476	9.04943e-05	0.000805646	BOD1	91272	0.00133173	307	370	389	222	228	215
1800	ENSG00000096717	175.625	-0.850079	0.217261	-3.91271	9.12643e-05	0.000811236	SIRT1	23411	0.00134097	235	193	250	127	150	98
1801	ENSG00000253341	350.339	-0.677667	0.173197	-3.9127	9.1269e-05	0.000811236	RP11-730G20.2	NA	0.00134097	391	401	502	247	291	271
1802	ENSG00000063854	310.973	0.636463	0.162666	3.91269	9.12742e-05	0.000811236	HAGH	3029	0.00134097	238	236	256	363	366	406
1803	ENSG00000176890	272.814	-0.695445	0.177779	-3.91185	9.15915e-05	0.000813605	TYMS	7298	0.00134489	366	357	289	196	219	210
1804	ENSG00000006327	909.89	0.776799	0.198613	3.91112	9.18702e-05	0.000815628	TNFRSF12A	51330	0.00134823	584	898	531	1149	976	1323
1805	ENSG00000105388	1308.13	-0.88246	0.225657	-3.91062	9.20612e-05	0.000816871	CEACAM5	1048	0.00135029	1973	1154	1962	1155	968	637
1806	ENSG00000218336	385.654	-0.737582	0.188693	-3.90889	9.27196e-05	0.000822257	TENM3	55714	0.00135919	528	485	433	355	286	226
1807	ENSG00000154146	19.8465	-2.17458	0.556468	-3.90782	9.31326e-05	0.000825463	NRGN	4900	0.00136449	37	39	22	7	12	3
1808	ENSG00000174684	315.87	0.676957	0.173252	3.90734	9.33165e-05	0.000826635	B4GAT1	11041	0.00136643	235	276	218	356	425	385
1809	ENSG00000079435	32.0039	-1.58643	0.406028	-3.90719	9.33776e-05	0.000826719	LIPE	3991	0.00136657	51	48	45	23	13	12
1810	ENSG00000138378	108.614	0.915598	0.234427	3.90569	9.39577e-05	0.000831396	STAT4	6775	0.0013743	75	69	82	126	136	164
1811	ENSG00000107201	130.514	0.916517	0.234681	3.90537	9.40797e-05	0.000832016	DDX58	23586	0.00137532	83	77	111	188	183	140
1812	ENSG00000241506	657.339	-0.568604	0.14561	-3.90499	9.42307e-05	0.000832891	PSMC1P1	NA	0.00137677	751	774	831	492	587	509
1813	ENSG00000215021	3503.59	-0.466432	0.119451	-3.9048	9.43026e-05	0.000833067	PHB2	11331	0.00137706	3958	4234	4003	2876	2844	3106
1814	ENSG00000132635	196.361	0.751433	0.192537	3.9028	9.50845e-05	0.000839511	PCED1A	64773	0.00138771	148	148	143	252	211	277
1815	ENSG00000124107	1266.81	0.734385	0.188189	3.90238	9.52504e-05	0.00084029	SLPI	6590	0.001389	867	798	1189	1324	1465	1958
1816	ENSG00000173653	170.505	-0.795062	0.203741	-3.90231	9.52776e-05	0.00084029	RCE1	9986	0.001389	209	250	190	124	115	134
1817	ENSG00000148702	150.913	1.28809	0.330145	3.9016	9.55594e-05	0.000842311	HABP2	3026	0.00139234	95	45	123	140	317	185
1818	ENSG00000070669	9.69431	-3.37325	0.864749	-3.90084	9.5859e-05	0.000844487	ASNS	440	0.00139594	18	16	20	2	1	2
1819	ENSG00000215252	95.31	3.13889	0.80483	3.90007	9.61652e-05	0.000846719	GOLGA8B	440270	0.00139962	18	13	28	66	96	351
1820	ENSG00000156983	176.512	-0.741081	0.190107	-3.89823	9.68984e-05	0.000852706	BRPF1	7862	0.00140952	220	228	214	138	123	135
1821	ENSG00000075213	148.133	0.948205	0.243262	3.89788	9.70393e-05	0.000853477	SEMA3A	10371	0.0014108	100	105	99	266	157	163
1822	ENSG00000182795	612.829	0.810861	0.208137	3.89581	9.78714e-05	0.000860323	C1orf116	79098	0.00142211	507	436	392	1068	667	607
1823	ENSG00000255823	193.159	1.06821	0.274217	3.8955	9.79947e-05	0.000860496	MTRNR2L8	100616263	0.0014224	127	87	160	186	226	373
1824	ENSG00000131711	1618.06	0.777848	0.199679	3.89549	9.79986e-05	0.000860496	MAP1B	4131	0.0014224	1095	1505	977	2658	1777	1697
1825	ENSG00000171160	63.6298	1.19947	0.307987	3.89455	9.83803e-05	0.000862906	MORN4	118812	0.00142638	30	32	53	82	83	101
1826	ENSG00000140365	624.07	-0.624312	0.160304	-3.89455	9.83807e-05	0.000862906	COMMD4	54939	0.00142638	700	876	694	437	530	507
1827	ENSG00000253217	17.3634	2.22202	0.570842	3.89253	9.92058e-05	0.000869666	KB-1991G8.1	NA	0.00143756	5	5	8	32	18	36
1828	ENSG00000155959	462.949	-0.591873	0.152112	-3.89104	9.98154e-05	0.000874532	VBP1	7411	0.0014456	576	521	573	379	392	337
1829	ENSG00000136811	200.95	-0.801675	0.206125	-3.88927	0.000100545	0.000880446	ODF2	4957	0.00145538	264	254	248	110	174	156
1830	ENSG00000123064	841.532	-0.609823	0.156819	-3.8887	0.000100784	0.00088205	DDX54	79039	0.00145803	1055	1121	875	749	656	594
1831	ENSG00000132541	160.258	0.784427	0.201738	3.88834	0.000100933	0.00088287	RIDA	10247	0.00145938	116	112	125	178	218	212
1832	ENSG00000104522	812.059	0.552921	0.142233	3.88742	0.000101316	0.000885743	TSTA3	7264	0.00146413	650	670	656	1041	852	1004
1833	ENSG00000137033	16.5888	2.25716	0.581075	3.88446	0.000102557	0.000896104	IL33	90865	0.00148126	8	4	5	19	32	32
1834	ENSG00000136425	204.637	-0.812325	0.209135	-3.88421	0.000102663	0.000896541	CIB2	10518	0.00148198	300	235	247	119	180	147
1835	ENSG00000116128	176.483	-0.890528	0.229356	-3.88274	0.000103288	0.000901501	BCL9	607	0.00149018	243	275	170	143	105	123
1836	ENSG00000110811	35.0435	-1.69716	0.437348	-3.88057	0.000104211	0.000909065	P3H3	10536	0.00150268	53	65	43	13	29	8
1837	ENSG00000108448	2059.64	-0.599592	0.154538	-3.87989	0.000104502	0.000911108	TRIM16L	147166	0.00150606	2519	2425	2501	2001	1524	1387
1838	ENSG00000237190	334.63	-0.614173	0.158519	-3.87445	0.000106866	0.000931212	CDKN2AIPNL	91368	0.00153929	385	420	410	258	278	258
1839	ENSG00000165029	14.4131	2.43021	0.627295	3.87411	0.000107014	0.000931991	ABCA1	19	0.00154058	4	3	6	19	22	32
1840	ENSG00000110628	542.859	0.617725	0.159489	3.87314	0.000107442	0.000935211	SLC22A18	5002	0.0015459	457	395	433	559	701	712
1841	ENSG00000170266	964.699	0.556058	0.143597	3.87236	0.000107787	0.000937705	GLB1	2720	0.00155002	808	796	739	1029	1122	1294
1842	ENSG00000235823	126.612	-0.883094	0.228117	-3.87123	0.000108286	0.000941218	OLMALINC	NA	0.00155583	162	163	168	109	86	72
1843	ENSG00000069869	399.711	-0.621089	0.160439	-3.87118	0.000108308	0.000941218	NEDD4	4734	0.00155583	463	501	489	347	322	276
1844	ENSG00000140988	22645.7	-0.62018	0.160255	-3.86995	0.000108858	0.000945486	RPS2	6187	0.00156289	27383	29091	25844	22180	16963	14413
1845	ENSG00000176092	325.446	1.03769	0.268304	3.8676	0.000109913	0.00095413	AIM1L	55057	0.00157717	244	277	118	574	336	404
1846	ENSG00000133393	397.329	-0.641757	0.165976	-3.86657	0.000110376	0.000957625	FOPNL	123811	0.00158295	475	522	457	334	334	263
1847	ENSG00000164209	261.284	0.729773	0.188802	3.86529	0.000110957	0.000962148	SLC25A46	91137	0.00159043	222	185	182	382	312	284
1848	ENSG00000158286	50.4424	1.61392	0.41767	3.86409	0.000111503	0.000966361	RNF207	388591	0.00159739	19	35	21	44	58	126
1849	ENSG00000143436	276.947	-0.650438	0.168347	-3.86368	0.000111693	0.000967487	MRPL9	65005	0.00159925	356	341	318	228	217	202
1850	ENSG00000182704	1757.55	0.488531	0.126452	3.86339	0.000111826	0.000968108	TSKU	25987	0.00160028	1551	1491	1346	2023	2036	2099
1851	ENSG00000116194	15.3937	2.64313	0.684274	3.86268	0.000112149	0.000970381	ANGPTL1	9068	0.00160404	3	1	9	15	31	34
1852	ENSG00000053747	214.845	0.833329	0.215791	3.86174	0.000112581	0.000973591	LAMA3	3909	0.00160934	166	166	132	292	205	328
1853	ENSG00000126254	1250.2	-0.488119	0.126405	-3.86154	0.000112674	0.000973869	RBM42	79171	0.0016098	1455	1504	1420	1078	994	1050
1854	ENSG00000164331	66.45	1.19334	0.309107	3.8606	0.000113107	0.000977088	ANKRA2	57763	0.00161512	44	32	45	86	70	122
1855	ENSG00000109320	201.622	-0.748148	0.193808	-3.86026	0.000113267	0.00097794	NFKB1	4790	0.00161653	249	286	223	166	139	147
1856	ENSG00000111752	105.329	-0.913939	0.236981	-3.85659	0.000114982	0.000992214	PHC1	1911	0.00164013	137	149	126	85	72	63
1857	ENSG00000221978	167.249	1.00025	0.259388	3.85617	0.000115176	0.000993358	CCNL2	81669	0.00164202	107	124	104	164	181	324
1858	ENSG00000078070	132.201	0.856954	0.22228	3.85529	0.000115592	0.000996407	MCCC1	56922	0.00164706	91	81	110	178	149	183
1859	ENSG00000118849	532.515	1.73589	0.450783	3.85084	0.000117713	0.00101408	RARRES1	5918	0.00167627	239	190	308	416	954	1087
1860	ENSG00000162076	290.388	0.685166	0.177932	3.85073	0.000117769	0.00101408	FLYWCH2	114984	0.00167627	196	229	243	312	387	375
1861	ENSG00000104765	239.618	0.725856	0.188555	3.84958	0.00011832	0.00101815	BNIP3L	665	0.00168301	152	195	195	311	320	264
1862	ENSG00000249014	54.192	-1.28232	0.333116	-3.84948	0.000118369	0.00101815	HMGN2P4	NA	0.00168301	71	94	65	27	43	25
1863	ENSG00000109670	60.9844	1.21236	0.315011	3.84863	0.000118782	0.00102115	FBXW7	55294	0.00168797	40	41	29	66	80	110
1864	ENSG00000149483	399.043	0.577392	0.15007	3.84749	0.000119335	0.00102536	TMEM138	51524	0.00169492	330	313	318	470	471	492
1865	ENSG00000034677	864.97	0.644566	0.167554	3.8469	0.000119621	0.00102727	RNF19A	25897	0.00169807	766	536	722	1185	973	1007
1866	ENSG00000026025	1873.64	-0.646601	0.168105	-3.84641	0.000119859	0.00102858	VIM	7431	0.00170024	1998	2367	2495	1452	1767	1163
1867	ENSG00000068971	115.45	0.847468	0.220332	3.84633	0.000119902	0.00102858	PPP2R5B	5526	0.00170024	87	75	85	142	150	153
1868	ENSG00000173193	254.723	0.690996	0.179681	3.84569	0.000120214	0.0010307	PARP14	54625	0.00170374	201	211	173	280	333	331
1869	ENSG00000178802	528.39	0.567821	0.147677	3.84502	0.00012054	0.00103295	MPI	4351	0.00170746	411	435	431	677	574	641
1870	ENSG00000134686	479.627	-0.634771	0.16519	-3.84268	0.0001217	0.00104233	PHC2	100500853	0.00172296	503	587	660	346	415	366
1871	ENSG00000048991	370.143	-0.669969	0.174386	-3.84187	0.000122102	0.00104521	R3HDM1	23518	0.00172772	497	490	376	312	280	265
1872	ENSG00000111540	893.746	0.533976	0.139047	3.84024	0.000122913	0.00105159	RAB5B	5869	0.00173827	720	753	718	1147	1075	950
1873	ENSG00000175265	87.3474	3.47414	0.904749	3.83989	0.000123089	0.00105253	GOLGA8A	23015	0.00173984	10	8	26	59	90	332
1874	ENSG00000110696	1103.91	-0.51003	0.132841	-3.8394	0.000123334	0.00105406	C11orf58	10944	0.00174236	1277	1230	1384	936	944	853
1875	ENSG00000134333	23087	-0.6211	0.161787	-3.83899	0.00012354	0.00105482	LDHA	3939	0.00174361	31708	25829	26406	17630	22139	14809
1876	ENSG00000023697	493.273	-0.618667	0.161154	-3.83897	0.000123554	0.00105482	DERA	51071	0.00174361	582	541	669	363	437	367
1877	ENSG00000158055	20.8913	1.98393	0.516865	3.83838	0.000123846	0.00105675	GRHL3	57822	0.00174681	5	9	11	45	24	31
1878	ENSG00000204536	89.4853	-1.01117	0.263583	-3.83625	0.000124928	0.00106541	CCHCR1	54535	0.00176112	121	131	106	49	76	53
1879	ENSG00000198853	581.454	0.678032	0.17684	3.83417	0.00012599	0.0010739	RUSC2	9853	0.00177515	449	472	422	789	544	814
1880	ENSG00000183762	135.963	-0.842512	0.21977	-3.8336	0.00012628	0.0010758	KREMEN1	83999	0.00177829	180	190	153	107	103	82
1881	ENSG00000030110	310.059	0.674625	0.176003	3.83304	0.00012657	0.0010777	BAK1	578	0.00178143	268	250	198	407	366	371
1882	ENSG00000205763	71.6064	-1.03701	0.270558	-3.83284	0.000126673	0.001078	RP9P	441212	0.00178193	91	97	101	40	50	51
1883	ENSG00000142530	20.9689	1.94198	0.506699	3.83262	0.000126788	0.0010784	FAM71E1	112703	0.0017826	10	7	9	32	44	24
1884	ENSG00000173821	2115.58	-0.501775	0.130935	-3.83224	0.000126979	0.00107946	RNF213	57674	0.00178434	2595	2578	2266	1882	1635	1737
1885	ENSG00000185043	1403.8	0.606919	0.158401	3.83153	0.000127351	0.00108205	CIB1	10519	0.00178862	1143	1055	1140	1352	1760	1973
1886	ENSG00000161021	292.551	-0.67886	0.177201	-3.83103	0.00012761	0.00108367	MAML1	9794	0.00179131	380	385	315	203	251	221
1887	ENSG00000169905	747.567	0.587004	0.153292	3.82931	0.000128503	0.00109016	TOR1AIP2	163590	0.00180203	617	552	623	916	1007	770
1888	ENSG00000130347	137.604	-0.80813	0.211039	-3.8293	0.00012851	0.00109016	RTN4IP1	84816	0.00180203	177	161	188	110	95	94
1889	ENSG00000185627	1374.14	-0.481413	0.125735	-3.8288	0.000128769	0.00109177	PSMD13	5719	0.0018047	1555	1674	1575	1134	1112	1195
1890	ENSG00000116791	788.464	0.630569	0.164701	3.82858	0.000128886	0.00109219	CRYZ	1429	0.00180538	643	575	637	766	1000	1109
1891	ENSG00000188818	23.4114	2.20579	0.576432	3.82663	0.00012991	0.00110028	ZDHHC11	79844	0.00181876	8	11	6	14	35	67
1892	ENSG00000129055	469.409	0.646775	0.169058	3.82577	0.000130366	0.00110356	ANAPC13	25847	0.00182418	387	295	415	573	604	542
1893	ENSG00000164880	1585.18	-0.686298	0.179404	-3.82544	0.000130539	0.00110445	INTS1	26173	0.00182565	2174	2133	1559	1490	1148	1007
1894	ENSG00000160075	1172.56	-0.520132	0.135981	-3.82503	0.000130758	0.00110571	SSU72	29101	0.00182774	1401	1291	1453	963	1044	883
1895	ENSG00000137106	1439.61	0.498189	0.130342	3.82217	0.00013228	0.00111799	GRHPR	9380	0.00184804	1229	1176	1175	1689	1547	1821
1896	ENSG00000139192	29.6819	1.64186	0.429722	3.82075	0.000133045	0.00112386	TAPBPL	55080	0.00185775	15	18	10	31	52	52
1897	ENSG00000149196	308.835	-0.665069	0.17409	-3.82025	0.000133315	0.00112555	HIKESHI	51501	0.00186053	379	326	431	239	229	249
1898	ENSG00000144354	161.414	-0.904255	0.236733	-3.81972	0.000133604	0.0011274	CDCA7	83879	0.00186359	200	268	163	100	136	101
1899	ENSG00000183763	48.6297	-1.4158	0.370782	-3.81842	0.000134311	0.00113276	TRAIP	10293	0.00187246	59	84	69	13	36	31
1900	ENSG00000158552	118.224	-0.859081	0.225013	-3.81792	0.000134583	0.00113446	ZFAND2B	130617	0.00187526	142	173	143	92	83	78
1901	ENSG00000154040	56.6555	1.11912	0.293346	3.81503	0.000136165	0.00114686	CABYR	26256	0.00189575	34	35	38	81	77	75
1902	ENSG00000198373	449.743	-0.642752	0.168481	-3.81498	0.000136197	0.00114686	WWP2	11060	0.00189575	551	579	515	420	326	307
1903	ENSG00000172465	79.2238	1.0299	0.270164	3.81211	0.000137784	0.00115962	TCEAL1	9338	0.00191684	54	43	60	94	99	126
1904	ENSG00000119285	661.829	-0.582541	0.152819	-3.81197	0.000137862	0.00115966	HEATR1	55127	0.00191692	796	852	733	590	537	463
1905	ENSG00000119125	157.998	0.745979	0.195725	3.81137	0.0001382	0.00116121	GDA	9615	0.00191947	123	116	115	198	205	191
1906	ENSG00000204463	1564.45	-0.516589	0.135542	-3.81127	0.000138252	0.00116121	BAG6	7917	0.00191947	1980	1827	1717	1395	1297	1169
1907	ENSG00000134575	347.966	0.721665	0.189351	3.81125	0.000138263	0.00116121	ACP2	53	0.00191947	270	245	272	328	479	493
1908	ENSG00000116273	82.6226	-1.0127	0.265743	-3.81081	0.000138513	0.0011627	PHF13	148479	0.00192193	104	134	94	51	59	54
1909	ENSG00000139988	72.7224	1.54176	0.404805	3.80866	0.000139723	0.00117224	RDH12	145226	0.0019377	44	25	43	42	167	116
1910	ENSG00000165732	1837.6	-0.640074	0.168122	-3.80721	0.000140545	0.0011782	DDX21	9188	0.00194756	2290	2360	2067	1749	1454	1107
1911	ENSG00000214110	450.298	-0.70059	0.18402	-3.80714	0.000140581	0.0011782	LDHAP4	NA	0.00194756	675	524	474	353	387	290
1912	ENSG00000198791	866.411	-0.577096	0.151634	-3.80586	0.000141314	0.00118372	CNOT7	29883	0.00195669	1107	957	1048	681	798	608
1913	ENSG00000198952	747.42	-0.526332	0.138312	-3.8054	0.000141575	0.0011851	SMG5	23381	0.00195897	864	899	884	666	594	577
1914	ENSG00000145041	296.137	-0.650039	0.170828	-3.80523	0.000141673	0.0011851	DCAF1	9730	0.00195897	381	362	342	254	235	203
1915	ENSG00000106682	3152.52	-0.56355	0.148101	-3.80518	0.0001417	0.0011851	EIF4H	7458	0.00195897	4032	3851	3398	2916	2572	2146
1916	ENSG00000068394	375.487	-0.589282	0.154877	-3.80483	0.0001419	0.00118616	GPKOW	27238	0.00196071	468	451	434	319	293	287
1917	ENSG00000125814	44.2569	1.42506	0.374591	3.80432	0.000142195	0.001188	NAPB	63908	0.00196376	25	28	19	41	68	85
1918	ENSG00000105971	497.727	0.775347	0.203814	3.80418	0.000142273	0.00118804	CAV2	858	0.00196382	369	337	396	847	482	555
1919	ENSG00000145912	1008.68	-0.522497	0.137391	-3.80301	0.00014295	0.00119307	NHP2	55651	0.00197214	1217	1277	1073	869	815	800
1920	ENSG00000104419	275.928	-0.82021	0.215731	-3.80201	0.000143528	0.00119726	NDRG1	10397	0.00197907	353	334	369	201	261	137
1921	ENSG00000172216	930.765	-0.679023	0.17862	-3.80149	0.000143831	0.00119917	CEBPB	1051	0.00198222	928	1029	1481	685	726	736
1922	ENSG00000196154	2515.76	0.636266	0.167385	3.80122	0.000143988	0.00119985	S100A4	6275	0.00198335	1834	1778	2298	3671	2499	3015
1923	ENSG00000186638	60.6229	-1.20864	0.317983	-3.80096	0.000144135	0.00120024	KIF24	347240	0.00198399	103	86	65	27	38	45
1924	ENSG00000141552	723.624	-0.55763	0.146711	-3.80088	0.000144184	0.00120024	ANAPC11	51529	0.00198399	802	943	840	544	570	642
1925	ENSG00000185101	23.0804	2.12207	0.558489	3.79967	0.000144887	0.00120546	ANO9	338440	0.00199262	12	3	11	61	22	30
1926	ENSG00000136048	164.33	0.810515	0.213332	3.79931	0.0001451	0.0012066	DRAM1	55332	0.00199451	108	114	137	247	179	202
1927	ENSG00000110237	142.738	0.835204	0.21986	3.79879	0.000145405	0.00120851	ARHGEF17	9828	0.00199767	95	118	95	184	155	210
1928	ENSG00000103742	9.88846	3.46716	0.912798	3.79839	0.00014564	0.00120984	IGDCC4	57722	0.00199987	0	1	4	15	12	28
1929	ENSG00000006606	26.059	2.21491	0.583185	3.79795	0.000145896	0.00121134	CCL26	10344	0.00200234	9	17	2	75	25	29
1930	ENSG00000100028	923.631	-0.563676	0.148429	-3.79762	0.00014609	0.00121224	SNRPD3	6634	0.00200383	1024	1120	1162	850	729	657
1931	ENSG00000141458	1358.15	0.616418	0.162322	3.79751	0.000146156	0.00121224	NPC1	4864	0.00200383	1237	1155	825	1632	1634	1666
1932	ENSG00000179271	432.552	-0.634164	0.167079	-3.79559	0.000147291	0.00122102	GADD45GIP1	90480	0.00201835	493	612	474	312	337	368
1933	ENSG00000100353	2210.92	-0.611461	0.161126	-3.79493	0.000147685	0.00122366	EIF3D	8664	0.0020227	2538	2631	2849	2184	1519	1544
1934	ENSG00000171262	265.013	-0.755961	0.199225	-3.79451	0.000147933	0.00122507	FAM98B	283742	0.00202504	343	298	358	187	247	158
1935	ENSG00000257103	1220.4	-0.492708	0.129881	-3.79352	0.000148526	0.00122935	LSM14A	26065	0.00203211	1414	1403	1463	1031	1074	937
1936	ENSG00000165283	1459.65	-0.512103	0.135003	-3.79327	0.000148677	0.00122997	STOML2	30968	0.00203313	1702	1858	1588	1118	1195	1297
1937	ENSG00000119203	761.175	-0.547384	0.14436	-3.79181	0.000149552	0.00123657	CPSF3	51692	0.00204404	833	915	964	570	676	610
1938	ENSG00000141580	580.155	-0.538112	0.14195	-3.79085	0.000150131	0.00124071	WDR45B	56270	0.0020509	647	722	693	461	467	491
1939	ENSG00000143621	1855.37	-0.503024	0.1327	-3.79068	0.000150237	0.00124095	ILF2	3608	0.00205128	2150	2379	1997	1449	1522	1634
1940	ENSG00000164024	511.926	-0.539661	0.142406	-3.7896	0.00015089	0.0012457	METAP1	23173	0.00205914	626	601	592	425	418	409
1941	ENSG00000106355	393.552	-0.740472	0.195465	-3.78825	0.000151709	0.00125182	LSM5	23658	0.00206925	518	399	560	257	366	261
1942	ENSG00000106245	526.194	-0.629997	0.16634	-3.78741	0.000152226	0.00125544	BUD31	8896	0.00207523	559	602	757	379	418	442
1943	ENSG00000008018	1087.1	-0.48266	0.127493	-3.78577	0.000153232	0.00126308	PSMB1	5689	0.00208787	1258	1225	1319	888	925	908
1944	ENSG00000116133	3328.58	-0.670816	0.177244	-3.78471	0.00015389	0.00126785	DHCR24	1718	0.00209576	4263	3823	4181	3344	2386	1975
1945	ENSG00000102531	268.217	0.670163	0.17711	3.78388	0.000154403	0.00127142	FNDC3A	22862	0.00210166	213	196	212	362	284	342
1946	ENSG00000108829	3959.18	-0.560505	0.148211	-3.7818	0.000155696	0.00128141	LRRC59	55379	0.00211817	5138	4558	4460	3556	3419	2624
1947	ENSG00000164323	194.44	-0.744376	0.196991	-3.77874	0.000157625	0.0012963	CFAP97	57587	0.00214279	256	243	231	170	144	122
1948	ENSG00000135047	1411.64	0.831668	0.220095	3.77867	0.000157667	0.0012963	CTSL	1514	0.00214279	1167	867	1013	1099	2108	2216
1949	ENSG00000102753	313.64	-0.747724	0.19793	-3.77772	0.000158273	0.00130062	KPNA3	3839	0.00214992	436	431	312	271	240	192
1950	ENSG00000204574	815.967	-0.571818	0.151433	-3.77605	0.000159334	0.00130824	ABCF1	23	0.00216252	1022	975	931	739	675	555
1951	ENSG00000026751	9.08161	3.71495	0.98383	3.776	0.000159364	0.00130824	SLAMF7	57823	0.00216252	1	2	1	30	8	12
1952	ENSG00000204209	277.256	-0.657187	0.174104	-3.77467	0.000160218	0.00131458	DAXX	1616	0.00217299	345	331	341	240	220	185
1953	ENSG00000131558	646.434	-0.626352	0.165976	-3.77376	0.000160809	0.00131811	EXOC4	60412	0.00217883	782	755	817	598	520	407
1954	ENSG00000165912	190.213	-0.711827	0.188626	-3.77375	0.000160813	0.00131811	PACSIN3	29763	0.00217883	226	260	223	150	145	137
1955	ENSG00000198924	180.812	-0.737462	0.19553	-3.7716	0.000162204	0.00132883	DCLRE1A	9937	0.00219656	223	244	211	128	154	125
1956	ENSG00000163913	198.836	-0.694308	0.184139	-3.77057	0.000162874	0.00133364	IFT122	55764	0.0022045	249	233	255	150	163	142
1957	ENSG00000139579	783.727	-0.563623	0.149489	-3.77033	0.000163035	0.00133427	NABP2	79035	0.00220555	934	995	875	557	715	626
1958	ENSG00000120685	193.297	-0.721397	0.191377	-3.76952	0.000163564	0.00133792	PROSER1	80209	0.00221158	238	248	235	125	163	150
1959	ENSG00000226328	55.0994	1.36357	0.361784	3.76901	0.000163895	0.00133979	NUP50-AS1	NA	0.00221467	24	24	45	89	51	98
1960	ENSG00000110047	1154.49	0.70985	0.188344	3.7689	0.000163966	0.00133979	EHD1	10938	0.00221467	971	977	680	1792	1206	1300
1961	ENSG00000140694	573.776	-0.555334	0.147351	-3.76879	0.000164044	0.00133979	PARN	5073	0.00221467	673	673	703	485	496	413
1962	ENSG00000165637	3817.64	-0.56891	0.150994	-3.76775	0.000164724	0.00134466	VDAC2	7417	0.00222272	4650	4157	4876	3420	3309	2494
1963	ENSG00000134825	742.672	-0.560668	0.148827	-3.76726	0.000165051	0.00134624	TMEM258	693196	0.00222532	819	905	932	522	644	634
1964	ENSG00000196205	9479.84	-0.539092	0.143102	-3.76717	0.000165106	0.00134624	EEF1A1P5	NA	0.00222532	11042	10624	12027	9120	6821	7246
1965	ENSG00000181458	45.4944	1.24331	0.330045	3.76708	0.000165169	0.00134624	TMEM45A	55076	0.00222532	28	22	32	63	66	64
1966	ENSG00000227258	30.7775	1.66108	0.440987	3.76674	0.000165394	0.00134738	SMIM2-AS1	NA	0.00222722	17	8	20	33	60	47
1967	ENSG00000176155	91.8602	1.0855	0.288206	3.76639	0.000165623	0.00134856	CCDC57	284001	0.00222916	52	52	73	87	125	163
1968	ENSG00000130635	325.629	0.965786	0.256492	3.76536	0.000166307	0.00135344	COL5A1	1289	0.00223724	282	242	137	315	568	410
1969	ENSG00000167881	1163.24	-0.504062	0.133905	-3.76434	0.000166992	0.00135833	SRP68	6730	0.00224531	1363	1347	1383	1061	936	888
1970	ENSG00000105321	313.058	-0.633703	0.168495	-3.76097	0.000169257	0.00137605	CCDC9	26093	0.00227461	387	356	399	243	273	220
1971	ENSG00000124209	237.465	0.657682	0.174877	3.76083	0.000169349	0.0013761	RAB22A	57403	0.00227468	180	183	189	269	312	291
1972	ENSG00000183513	93.9765	1.04281	0.277313	3.76042	0.000169625	0.00137765	COA5	493753	0.00227725	63	50	71	102	108	169
1973	ENSG00000111666	324.001	-0.6861	0.182496	-3.75954	0.000170229	0.00138185	CHPT1	56994	0.00228419	410	414	375	241	301	204
1974	ENSG00000197555	138.456	-0.79077	0.210445	-3.75761	0.000171542	0.0013918	SIPA1L1	26037	0.00230065	168	191	168	111	100	93
1975	ENSG00000162552	70.4416	1.21154	0.322467	3.75711	0.00017189	0.00139391	WNT4	54361	0.00230413	52	33	42	64	100	132
1976	ENSG00000078140	493.296	-0.601072	0.159988	-3.75698	0.000171976	0.00139391	UBE2K	3093	0.00230413	601	573	611	430	418	328
1977	ENSG00000044090	166.551	0.779417	0.207482	3.75654	0.000172277	0.00139565	CUL7	9820	0.002307	140	122	106	215	184	233
1978	ENSG00000205937	1059.63	-0.595465	0.158524	-3.75631	0.000172434	0.00139601	RNPS1	10921	0.00230761	1153	1548	1125	798	866	868
1979	ENSG00000215859	24.5176	1.80991	0.481843	3.75622	0.000172497	0.00139601	RP6-74O6.2	NA	0.00230761	13	8	11	23	47	45
1980	ENSG00000087053	401.283	-0.74281	0.197772	-3.7559	0.000172721	0.00139712	MTMR2	8898	0.00230944	551	480	476	357	332	212
1981	ENSG00000189343	4701.32	-0.611136	0.162726	-3.75562	0.000172913	0.00139797	RPS2P46	NA	0.00231084	5731	5947	5369	4610	3601	2949
1982	ENSG00000197111	1571.08	-0.514176	0.136928	-3.75508	0.000173287	0.0013997	PCBP2	5094	0.00231369	1687	1848	2009	1200	1410	1273
1983	ENSG00000143412	67.0904	1.1737	0.312566	3.75506	0.000173301	0.0013997	ANXA9	8416	0.00231369	44	26	53	74	105	100
1984	ENSG00000142528	144.304	-0.769783	0.205225	-3.75092	0.000176184	0.00142226	ZNF473	25888	0.00235099	175	174	197	102	104	114
1985	ENSG00000231925	1120.98	0.543307	0.144875	3.75019	0.000176703	0.00142573	TAPBP	6892	0.00235672	904	1020	813	1297	1453	1239
1986	ENSG00000165752	219.194	-0.703649	0.187669	-3.74942	0.000177243	0.00142937	STK32C	282974	0.00236274	260	295	260	182	176	142
1987	ENSG00000103194	982.577	-0.503294	0.134304	-3.74744	0.000178649	0.00143998	USP10	9100	0.00238028	1155	1161	1141	850	852	737
1988	ENSG00000148688	198.341	-0.734854	0.196154	-3.74632	0.000179451	0.00144572	RPP30	10556	0.00238976	223	227	293	143	156	148
1989	ENSG00000259772	47.5246	1.27928	0.341495	3.74612	0.000179594	0.00144614	RP11-16E12.2	NA	0.00239047	27	21	36	64	57	81
1990	ENSG00000111275	1086.18	0.774203	0.206687	3.74577	0.000179843	0.00144742	ALDH2	217	0.00239258	706	707	992	941	1569	1603
1991	ENSG00000196954	232.151	0.772831	0.206482	3.74285	0.000181944	0.00146359	CASP4	837	0.00241932	142	154	219	271	281	327
1992	ENSG00000180229	33.169	1.91847	0.512816	3.74105	0.000183256	0.00147341	HERC2P3	283755	0.00243554	12	13	16	22	37	98
1993	ENSG00000101888	99.0912	-0.881209	0.23562	-3.73996	0.000184052	0.00147906	NXT2	55916	0.00244489	140	118	127	70	73	67
1994	ENSG00000135749	118.544	0.884931	0.236711	3.73844	0.000185168	0.00148728	PCNX2	80003	0.00245848	69	94	87	181	135	146
1995	ENSG00000221926	1237.29	-0.565821	0.151365	-3.73813	0.000185393	0.00148835	TRIM16	10626	0.00246024	1454	1439	1538	1189	936	868
1996	ENSG00000125821	274.189	-0.664846	0.177886	-3.73747	0.00018588	0.00149151	DTD1	92675	0.00246547	337	330	341	250	193	194
1997	ENSG00000107959	1176.04	0.556958	0.149052	3.73667	0.000186477	0.00149514	PITRM1	10531	0.00247147	1061	951	843	1566	1264	1372
1998	ENSG00000139182	60.3401	1.69737	0.454254	3.73661	0.000186519	0.00149514	CLSTN3	9746	0.00247147	21	37	27	37	65	175
1999	ENSG00000115461	9.35899	3.43431	0.919153	3.73638	0.000186687	0.00149573	IGFBP5	3488	0.00247245	3	2	0	9	17	26
[truncated: 56,736 more rows]
