# Supplementary material for: A Non-Genetic, Cell Cycle Dependent Mechanism of Platinum Resistance in Lung Adenocarcinoma
Source: bioRxiv preprint, doi:10.1101/2020.11.26.400499, version 2 (2021-05-05)
Supplement: Supplement Table 3 [file 400499_file23.xlsx]

## Sheet: Control vs Cisplatin Small Cell
	Row.names	baseMean	log2FoldChange	lfcSE	stat	pvalue	padj	symbol	entrez	qValue	Control#1	Control#2	Control#3	Small#1	Small#2	Small#3
1	ENSG00000245532	2114	4.63075	0.156621	29.5665	4.02481e-192	8.16834e-188	NEAT1	693197	8.56534e-188	158	180	154	3763	3951	4477
2	ENSG00000276550	840.834	5.75312	0.240236	23.9478	9.73497e-127	9.87856e-123	HERC2P2	NA	1.03587e-122	27	34	31	1302	1797	1853
3	ENSG00000215252	718.48	5.97965	0.257386	23.2323	2.15051e-119	1.45482e-115	GOLGA8B	440270	1.52552e-115	21	15	32	1200	1496	1547
4	ENSG00000251562	1997.43	3.91544	0.183891	21.2922	1.34081e-100	6.80291e-97	MALAT1	378938	7.13355e-97	238	206	302	3114	4100	4025
5	ENSG00000102287	458.23	4.73463	0.223942	21.1422	3.25313e-99	1.32045e-95	GABRE	574412	1.38462e-95	31	40	28	828	844	978
6	ENSG00000175265	575.982	6.105	0.292593	20.8652	1.10997e-96	3.75446e-93	GOLGA8A	23015	3.93694e-93	11	9	30	980	1182	1244
7	ENSG00000147162	1314.58	2.86436	0.144288	19.8518	1.06384e-87	3.08437e-84	OGT	8473	3.23427e-84	309	317	326	2131	2517	2287
8	ENSG00000173209	349.965	4.80015	0.2553	18.802	7.27127e-79	1.84463e-75	AHSA2	130872	1.93428e-75	22	29	23	570	686	771
9	ENSG00000206149	326.616	4.00116	0.235788	16.9693	1.3859e-64	3.1252e-61	HERC2P9	440248	3.27709e-61	37	42	36	493	657	694
10	ENSG00000198563	341.086	4.2684	0.256198	16.6606	2.53612e-62	5.14705e-59	DDX39B	7919	5.39721e-59	27	42	32	565	563	817
11	ENSG00000114857	651.188	3.97983	0.241192	16.5007	3.62887e-61	6.69526e-58	NKTR	4820	7.02067e-58	85	81	66	875	1165	1635
12	ENSG00000244879	341.895	3.37081	0.211943	15.9043	5.91611e-57	1.00056e-53	GABPB1-AS1	100616396	1.04919e-53	61	72	47	543	666	662
13	ENSG00000180229	228.348	4.77819	0.300719	15.8892	7.52743e-57	1.17515e-53	HERC2P3	283755	1.23226e-53	15	15	19	351	457	514
14	ENSG00000221978	467.154	2.63769	0.168532	15.651	3.27036e-55	4.74086e-52	CCNL2	81669	4.97128e-52	124	144	120	822	762	830
15	ENSG00000163660	492.054	2.91341	0.197471	14.7536	2.9166e-49	3.94615e-46	CCNL1	57018	4.13795e-46	126	103	117	707	878	1021
16	ENSG00000115419	551.686	2.53255	0.178277	14.2057	8.44863e-46	1.07166e-42	GLS	2744	1.12374e-42	182	161	145	809	975	1039
17	ENSG00000117616	197.836	3.62322	0.256232	14.1404	2.14086e-45	2.55581e-42	RSRP1	57035	2.68003e-42	37	22	30	334	348	416
18	ENSG00000026103	335.043	3.02899	0.215309	14.0681	5.96642e-45	6.72714e-42	FAS	355	7.0541e-42	84	69	66	481	687	623
19	ENSG00000130066	1974.86	2.10345	0.14962	14.0586	6.8223e-45	7.28729e-42	SAT1	6303	7.64147e-42	690	732	816	2850	3179	3583
20	ENSG00000166532	2093.07	2.34303	0.168626	13.8949	6.80486e-44	6.90523e-41	RIMKLB	57494	7.24084e-41	645	676	747	2804	3637	4049
21	ENSG00000081041	251.255	4.08428	0.294287	13.8786	8.54349e-44	8.25667e-41	CXCL2	2920	8.65797e-41	22	48	14	451	526	447
22	ENSG00000167615	855.319	2.37663	0.172251	13.7975	2.64023e-43	2.43561e-40	LENG8	114823	2.55399e-40	255	311	263	1616	1204	1483
23	ENSG00000157613	199.896	-4.75019	0.345582	-13.7455	5.42213e-43	4.78444e-40	CREB3L1	90993	5.01697e-40	387	247	523	10	21	12
24	ENSG00000160182	286.148	-3.72489	0.27448	-13.5707	5.97372e-42	4.93978e-39	TFF1	7031	5.17987e-39	507	353	736	41	38	41
25	ENSG00000169031	236.613	3.36927	0.2483	13.5694	6.08498e-42	4.93978e-39	COL4A3	1285	5.17987e-39	43	39	44	355	395	544
26	ENSG00000102908	472.303	2.87156	0.213853	13.4278	4.15839e-41	3.24594e-38	NFAT5	10725	3.4037e-38	103	129	109	644	817	1032
27	ENSG00000236287	381.619	2.29969	0.172306	13.3466	1.24051e-40	9.32449e-38	ZBED5	58486	9.77768e-38	133	126	128	589	689	625
28	ENSG00000138166	908.784	1.82711	0.137542	13.284	2.86597e-40	2.07732e-37	DUSP5	1847	2.17828e-37	410	384	405	1470	1381	1403
29	ENSG00000099797	1166.69	-2.18266	0.165348	-13.2004	8.72299e-40	6.10459e-37	TECR	693224	6.40129e-37	1933	1845	1960	511	357	394
30	ENSG00000175832	395.162	-2.76118	0.209492	-13.1804	1.13824e-39	7.7002e-37	ETV4	2118	8.07445e-37	685	683	699	136	79	88
31	ENSG00000092621	1315.25	-3.26725	0.24916	-13.1131	2.77155e-39	1.81447e-36	PHGDH	26227	1.90266e-36	1991	2597	2562	367	214	160
32	ENSG00000268043	160.44	4.14386	0.316941	13.0745	4.60384e-39	2.91984e-36	NBPF12	149013	3.06175e-36	15	22	15	243	277	391
33	ENSG00000088992	855.067	-2.27495	0.174346	-13.0485	6.4825e-39	3.98674e-36	TESC	54997	4.1805e-36	1354	1453	1445	342	228	309
34	ENSG00000162601	239.039	3.68558	0.282913	13.0272	8.56577e-39	5.11301e-36	MYSM1	114803	5.36152e-36	28	34	41	304	460	566
35	ENSG00000105388	1133.51	-2.70983	0.209713	-12.9216	3.39955e-38	1.97125e-35	CEACAM5	1048	2.06706e-35	2294	1344	2262	292	277	333
36	ENSG00000250337	182.777	4.1839	0.324548	12.8915	5.02717e-38	2.83407e-35	LINC01021	643401	2.97181e-35	17	19	21	230	454	356
37	ENSG00000100201	2488.5	2.32347	0.18058	12.8667	6.93274e-38	3.70555e-35	DDX17	10521	3.88565e-35	800	1038	648	3770	4409	4266
38	ENSG00000163071	155.577	4.24072	0.329591	12.8666	6.9382e-38	3.70555e-35	SPATA18	132671	3.88565e-35	18	14	15	206	341	339
39	ENSG00000264112	250.655	3.96831	0.308694	12.8552	8.04414e-38	4.18604e-35	RP11-159D12.2	NA	4.3895e-35	18	39	34	347	416	650
40	ENSG00000144802	141.672	5.20426	0.406813	12.7928	1.79983e-37	9.13189e-35	NFKBIZ	64332	9.57572e-35	3	15	5	245	339	244
41	ENSG00000177034	198.83	2.76552	0.217015	12.7434	3.39109e-37	1.67859e-34	MTX3	345778	1.76018e-34	55	48	50	322	341	378
42	ENSG00000131080	244.523	2.9116	0.229492	12.6871	6.96872e-37	3.36739e-34	EDA2R	60401	3.53105e-34	62	42	68	377	497	421
43	ENSG00000230590	164.581	4.8794	0.387222	12.601	2.08357e-36	9.83395e-34	FTX	100302692	1.03119e-33	9	16	7	232	264	459
44	ENSG00000132424	701.598	2.66502	0.21369	12.4715	1.06855e-35	4.92868e-33	PNISR	25957	5.16823e-33	156	190	229	926	1214	1496
45	ENSG00000164938	182.658	3.76889	0.303233	12.429	1.81855e-35	8.20168e-33	TP53INP1	94241	8.6003e-33	24	30	21	273	468	280
46	ENSG00000164211	374.686	2.28497	0.184267	12.4004	2.60181e-35	1.14791e-32	STARD4	134429	1.2037e-32	146	127	109	562	664	641
47	ENSG00000215030	1534.89	-1.67249	0.135889	-12.3077	8.22942e-35	3.55353e-32	RPL13P12	NA	3.72624e-32	2152	2319	2539	746	745	708
48	ENSG00000188643	3487.7	-1.8633	0.151722	-12.281	1.14553e-34	4.84343e-32	S100A16	140576	5.07883e-32	5728	5411	5276	1778	1317	1417
49	ENSG00000132680	358.218	2.55106	0.20804	12.2624	1.44215e-34	5.97314e-32	KIAA0907	22889	6.26345e-32	109	80	124	565	560	711
50	ENSG00000197969	524.732	2.51702	0.206545	12.1863	3.6767e-34	1.49237e-31	VPS13A	23230	1.56491e-31	166	167	135	688	898	1094
51	ENSG00000177600	5931.41	-1.92845	0.159203	-12.1131	9.00045e-34	3.5349e-31	RPLP2	6181	3.70671e-31	8760	10030	9395	2931	2417	2056
52	ENSG00000224078	709.081	2.22147	0.183402	12.1126	9.05716e-34	3.5349e-31	SNHG14	NA	3.70671e-31	244	282	225	941	1234	1328
53	ENSG00000161010	162.505	2.73346	0.226814	12.0515	1.90361e-33	7.28938e-31	C5orf45	51149	7.64366e-31	41	46	40	291	281	275
54	ENSG00000124762	2128.07	2.33373	0.19387	12.0376	2.25515e-33	8.47559e-31	CDKN1A	1026	8.88752e-31	670	619	825	3254	4519	2881
55	ENSG00000242086	149.598	3.9861	0.332068	12.0039	3.39144e-33	1.25144e-30	LINC00969	NA	1.31227e-30	25	15	13	223	244	378
56	ENSG00000126247	7756.5	-1.59877	0.133233	-11.9998	3.56113e-33	1.29059e-30	CAPNS1	826	1.35332e-30	12307	10898	11783	4260	3660	3631
57	ENSG00000117335	4283.33	2.09839	0.175008	11.9903	3.99682e-33	1.42308e-30	CD46	4179	1.49224e-30	1858	1476	1530	5447	7580	7809
58	ENSG00000158286	149.37	3.22916	0.270205	11.9508	6.43351e-33	2.25117e-30	RNF207	388591	2.36059e-30	22	41	24	261	257	291
59	ENSG00000114270	637.513	2.84594	0.238426	11.9364	7.64673e-33	2.63035e-30	COL7A1	100313843	2.75819e-30	139	226	102	1203	1157	998
60	ENSG00000149311	437.397	2.94605	0.246959	11.9293	8.32332e-33	2.81536e-30	ATM	472	2.9522e-30	103	110	89	524	758	1041
61	ENSG00000187840	1093.18	-2.7909	0.234602	-11.8963	1.23732e-32	4.11661e-30	EIF4EBP1	1978	4.31669e-30	1525	2112	2095	388	244	195
62	ENSG00000214548	142.368	5.29691	0.446469	11.864	1.82071e-32	5.95989e-30	MEG3	55384	6.24955e-30	8	7	6	228	420	185
63	ENSG00000156976	1549.66	2.35219	0.19862	11.8427	2.34822e-32	7.56461e-30	EIF4A2	100302143	7.93227e-30	443	419	661	2162	2714	2898
64	ENSG00000253352	1128.99	1.70566	0.145527	11.7206	1.00014e-31	3.17154e-29	TUG1	NA	3.32568e-29	569	530	490	1580	1860	1745
65	ENSG00000087086	66977.5	-1.83632	0.157093	-11.6894	1.44381e-31	4.50803e-29	FTL	2512	4.72713e-29	103494	103962	106493	35840	25993	26083
66	ENSG00000125743	3218.42	-1.72499	0.147614	-11.6858	1.50589e-31	4.63061e-29	SNRPD2	6633	4.85567e-29	4697	4774	5356	1726	1373	1385
67	ENSG00000133858	446.826	2.66287	0.228195	11.6693	1.82983e-31	5.54275e-29	ZFC3H1	196441	5.81214e-29	156	111	98	595	781	941
68	ENSG00000172667	247.004	2.68695	0.230967	11.6335	2.78588e-31	8.31462e-29	ZMAT3	64393	8.71873e-29	63	72	64	331	518	434
69	ENSG00000111799	712.186	1.85862	0.159894	11.6241	3.10794e-31	9.1414e-29	COL12A1	1303	9.58569e-29	344	276	302	1051	1070	1229
70	ENSG00000031003	154.608	3.68703	0.319482	11.5407	8.22986e-31	2.38607e-28	FAM13B	51306	2.50204e-28	24	31	12	207	314	340
71	ENSG00000034510	15931.8	-1.87398	0.162417	-11.5381	8.48248e-31	2.42468e-28	TMSB10	9168	2.54252e-28	22909	23548	28645	8081	6469	5939
72	ENSG00000138834	160.2	3.09926	0.269129	11.5159	1.09691e-30	3.06379e-28	MAPK8IP3	23162	3.2127e-28	32	46	23	332	274	256
73	ENSG00000053747	473.033	2.0957	0.181989	11.5155	1.10203e-30	3.06379e-28	LAMA3	3909	3.2127e-28	193	193	152	690	880	731
74	ENSG00000111669	12561.8	-1.57387	0.136765	-11.5079	1.20408e-30	3.30228e-28	TPI1	7167	3.46277e-28	20174	18780	17465	7036	5800	6116
75	ENSG00000188647	633.431	1.90984	0.166	11.5051	1.2439e-30	3.366e-28	PTAR1	375743	3.52959e-28	291	265	242	869	1053	1080
76	ENSG00000166794	2023.13	-1.45249	0.126457	-11.4861	1.55016e-30	4.13955e-28	PPIB	5479	4.34074e-28	2939	2946	3006	1153	1062	1033
77	ENSG00000163453	166.592	2.71209	0.236255	11.4795	1.67257e-30	4.40841e-28	IGFBP7	3490	4.62267e-28	54	41	37	278	274	316
78	ENSG00000105202	2818.49	-1.84139	0.160578	-11.4673	1.9268e-30	5.01339e-28	FBL	2091	5.25705e-28	4178	4547	4496	1490	1148	1051
79	ENSG00000167632	662.296	-1.66585	0.145404	-11.4567	2.17625e-30	5.59075e-28	TRAPPC9	83696	5.86248e-28	1071	937	1014	322	311	320
80	ENSG00000213903	132.718	3.63572	0.318419	11.418	3.39787e-30	8.61997e-28	LTB4R	1241	9.03893e-28	20	19	20	209	197	331
81	ENSG00000134884	515.107	1.72943	0.151583	11.4091	3.76393e-30	9.43073e-28	ARGLU1	55082	9.88908e-28	237	227	253	772	808	794
82	ENSG00000178038	157.726	2.55793	0.224636	11.387	4.85322e-30	1.20117e-27	ALS2CL	259173	1.25955e-27	48	46	44	263	265	281
83	ENSG00000129003	895.923	2.57118	0.226915	11.331	9.21342e-30	2.2269e-27	VPS13C	54832	2.33513e-27	271	264	239	1005	1603	1993
84	ENSG00000092439	558.86	2.18425	0.192768	11.331	9.21701e-30	2.2269e-27	TRPM7	54822	2.33513e-27	229	214	161	781	902	1066
85	ENSG00000074800	34492	-1.70565	0.150564	-11.3284	9.49355e-30	2.26673e-27	ENO1	2023	2.37689e-27	58289	52876	47226	18654	14603	15303
86	ENSG00000135390	2576.05	-1.62706	0.143959	-11.3022	1.27994e-29	3.01746e-27	ATP5G2	517	3.16411e-27	3657	3852	4168	1432	1153	1194
87	ENSG00000196739	116.24	3.15315	0.279009	11.3013	1.29352e-29	3.01746e-27	COL27A1	85301	3.16411e-27	23	25	23	188	204	235
88	ENSG00000167468	1134.26	-2.18636	0.193726	-11.2858	1.54222e-29	3.55675e-27	GPX4	2879	3.72961e-27	1718	1937	1925	539	354	332
89	ENSG00000165916	1616.58	-1.62173	0.144027	-11.2599	2.06962e-29	4.71944e-27	PSMC3	5702	4.94881e-27	2454	2460	2406	909	747	723
90	ENSG00000175455	559.915	2.26022	0.200884	11.2514	2.28011e-29	5.14165e-27	CCDC14	64770	5.39155e-27	185	196	199	697	956	1127
91	ENSG00000134684	2270.99	-1.77711	0.158011	-11.2467	2.40383e-29	5.36107e-27	YARS	8565	5.62163e-27	3059	3431	4059	1118	1046	913
92	ENSG00000089157	25693.4	-1.49368	0.132828	-11.2453	2.44358e-29	5.39048e-27	RPLP0	6175	5.65247e-27	38194	38012	37556	14778	13776	11843
93	ENSG00000257671	106.762	3.81402	0.340137	11.2132	3.51295e-29	7.66616e-27	RP3-416H24.1	NA	8.03875e-27	13	16	13	170	172	256
94	ENSG00000233695	86.3983	4.80344	0.428745	11.2035	3.91908e-29	8.46145e-27	GAS6-AS1	NA	8.8727e-27	5	5	8	158	168	175
95	ENSG00000105281	3420.01	-2.21253	0.197619	-11.1959	4.26915e-29	9.12025e-27	SLC1A5	6510	9.56352e-27	5163	5275	6442	1612	1022	1007
96	ENSG00000204392	412.799	-1.81021	0.161728	-11.193	4.41449e-29	9.33252e-27	LSM2	57819	9.7861e-27	600	680	647	186	170	193
97	ENSG00000186594	194.739	2.38087	0.212848	11.1858	4.78801e-29	1.00178e-26	MIR22HG	407004	1.05047e-26	58	64	66	309	365	306
98	ENSG00000090861	4617.73	-1.72395	0.154157	-11.1831	4.93392e-29	1.02177e-26	AARS	16	1.07143e-26	6380	6655	8234	2395	2078	1965
99	ENSG00000140990	1562.53	-1.72409	0.155716	-11.072	1.71589e-28	3.51758e-26	NDUFB10	4716	3.68854e-26	2375	2369	2453	851	613	713
100	ENSG00000213553	2651.71	-1.5015	0.135807	-11.0561	2.0471e-28	4.1546e-26	RPLP0P6	NA	4.35652e-26	3977	3971	3810	1482	1449	1221
101	ENSG00000145494	979.522	-2.06587	0.186915	-11.0525	2.13261e-28	4.28528e-26	NDUFS6	4726	4.49356e-26	1616	1512	1617	491	326	315
102	ENSG00000145734	551.684	2.20302	0.199795	11.0264	2.84996e-28	5.67057e-26	BDP1	55814	5.94618e-26	218	219	153	736	968	1016
103	ENSG00000138688	466.004	2.54177	0.230675	11.0188	3.10071e-28	6.1096e-26	KIAA1109	84162	6.40654e-26	140	144	126	536	862	988
104	ENSG00000104093	557.543	2.13017	0.193512	11.0079	3.49977e-28	6.82961e-26	DMXL2	23312	7.16154e-26	186	241	196	720	986	1018
105	ENSG00000168528	928.609	-1.94494	0.176995	-10.9887	4.3318e-28	8.37274e-26	SERINC2	347735	8.77968e-26	1618	1386	1419	467	313	368
106	ENSG00000136942	3592.05	-1.83272	0.166846	-10.9844	4.53999e-28	8.69237e-26	RPL35	11224	9.11484e-26	5276	6015	5538	1921	1505	1297
107	ENSG00000105438	3943.36	-1.48416	0.135446	-10.9576	6.11102e-28	1.15909e-25	KDELR1	10945	1.21543e-25	5926	5840	5664	2344	1947	1939
108	ENSG00000175063	648.125	-2.14871	0.197054	-10.9042	1.101e-27	2.06896e-25	UBE2C	11065	2.16951e-25	1032	1291	850	277	205	234
109	ENSG00000131791	202.655	2.58094	0.237023	10.889	1.30045e-27	2.42135e-25	PRKAB2	5565	2.53903e-25	48	64	63	290	420	332
110	ENSG00000101104	83.6766	4.02974	0.370432	10.8785	1.45985e-27	2.69342e-25	PABPC1L	80336	2.82432e-25	11	13	5	156	158	159
111	ENSG00000204186	144.598	3.05316	0.281323	10.8529	1.93254e-27	3.53342e-25	ZDBF2	57683	3.70515e-25	25	33	36	193	280	302
112	ENSG00000112414	931.95	1.73365	0.159892	10.8427	2.16082e-27	3.91552e-25	ADGRG6	57211	4.10582e-25	421	428	443	1198	1554	1547
113	ENSG00000128000	136.112	3.23479	0.299031	10.8176	2.84188e-27	5.10407e-25	ZNF780B	163131	5.35214e-25	25	25	28	173	266	300
114	ENSG00000205609	6870.6	-1.45163	0.134703	-10.7765	4.44327e-27	7.9102e-25	EIF3CL	728689	8.29465e-25	10080	10176	9932	4171	3440	3425
115	ENSG00000153914	816.905	2.20555	0.204679	10.7756	4.4875e-27	7.91947e-25	SREK1	140890	8.30437e-25	298	265	311	1080	1178	1771
116	ENSG00000174547	685.427	-1.69386	0.157284	-10.7694	4.79874e-27	8.39572e-25	MRPL11	65003	8.80377e-25	1037	1106	998	365	283	323
117	ENSG00000213442	3109.22	-2.48762	0.231202	-10.7595	5.34497e-27	9.27147e-25	RPL18AP3	NA	9.72208e-25	4971	5755	5107	1379	776	667
118	ENSG00000227671	92.9348	4.17919	0.388968	10.7443	6.3043e-27	1.08429e-24	RP11-488L18.4	NA	1.13699e-24	7	13	9	126	200	202
119	ENSG00000214026	730.35	-2.20389	0.205451	-10.7271	7.59225e-27	1.29483e-24	MRPL23	107987373	1.35776e-24	1226	1254	1121	351	199	231
120	ENSG00000139182	150.932	3.029	0.282695	10.7147	8.6816e-27	1.46828e-24	CLSTN3	9746	1.53964e-24	25	43	31	266	211	330
121	ENSG00000184465	84.6567	3.72304	0.347934	10.7004	1.01295e-26	1.69899e-24	WDR27	253769	1.78157e-24	11	16	8	153	149	170
122	ENSG00000184110	6976.98	-1.43753	0.134518	-10.6866	1.17636e-26	1.95691e-24	EIF3C	728689	2.05202e-24	10212	10286	10076	4264	3515	3508
123	ENSG00000135679	1571.87	1.88005	0.176179	10.6712	1.38818e-26	2.29049e-24	MDM2	4193	2.40181e-24	636	669	710	1966	3010	2440
124	ENSG00000255717	685.309	1.99188	0.186728	10.6673	1.44764e-26	2.36934e-24	SNHG1	NA	2.48449e-24	213	268	346	1075	1073	1136
125	ENSG00000125648	1028.97	-1.50341	0.140965	-10.6652	1.48129e-26	2.40503e-24	SLC25A23	79085	2.52192e-24	1595	1412	1557	562	552	496
126	ENSG00000131002	273.901	2.52553	0.237481	10.6347	2.05547e-26	3.31077e-24	TXLNGY	246126	3.47168e-24	89	73	81	383	401	617
127	ENSG00000241343	90.9088	3.6886	0.347004	10.6299	2.16398e-26	3.45811e-24	RPL36A	6173	3.62618e-24	9	19	11	143	181	182
128	ENSG00000172809	4057.74	-1.6188	0.15284	-10.5915	3.26408e-26	5.17536e-24	RPL38	6169	5.42689e-24	5409	5937	7021	2207	1970	1803
129	ENSG00000105640	7559.62	-2.20899	0.208961	-10.5713	4.04932e-26	6.37061e-24	RPL18A	6142	6.68024e-24	11839	13252	12202	3728	2353	1984
130	ENSG00000157214	380.329	2.08057	0.197058	10.5581	4.6591e-26	7.27358e-24	STEAP2	261729	7.62709e-24	133	147	156	503	610	733
131	ENSG00000263956	95.3206	3.72405	0.352743	10.5574	4.69514e-26	7.27388e-24	NBPF11	200030	7.62741e-24	13	16	11	141	163	227
132	ENSG00000198796	339.992	1.96311	0.186454	10.5287	6.3735e-26	9.79926e-24	ALPK2	115701	1.02755e-23	135	139	142	453	574	597
133	ENSG00000185201	1197.62	-1.86477	0.177396	-10.5119	7.61368e-26	1.1618e-23	IFITM2	10581	1.21827e-23	1873	1581	2184	610	461	477
134	ENSG00000204628	15762.6	-1.5266	0.145562	-10.4877	9.84315e-26	1.4908e-23	RACK1	10399	1.56325e-23	22960	23637	23611	9279	8230	6858
135	ENSG00000163902	3254.4	-1.33473	0.127366	-10.4795	1.07301e-25	1.61309e-23	RPN1	6184	1.69149e-23	4899	4485	4598	1804	1759	1981
136	ENSG00000147403	14027.8	-1.45277	0.138641	-10.4787	1.08246e-25	1.61533e-23	RPL10	6134	1.69384e-23	19898	20840	20909	8184	7892	6444
137	ENSG00000186529	345.925	1.9225	0.183522	10.4756	1.11814e-25	1.65639e-23	CYP4F3	4051	1.7369e-23	144	122	167	585	551	507
138	ENSG00000268350	273.983	2.14844	0.205118	10.4741	1.13564e-25	1.67014e-23	FAM156A	727866	1.75131e-23	91	113	98	436	381	524
139	ENSG00000123836	442.367	1.8147	0.17371	10.4467	1.51681e-25	2.21465e-23	PFKFB2	5208	2.32228e-23	189	208	191	596	696	774
140	ENSG00000102007	3077.41	-1.58789	0.15214	-10.437	1.68e-25	2.4354e-23	PLP2	5355	2.55377e-23	4875	4333	4647	1621	1278	1711
141	ENSG00000179304	271.898	2.14112	0.205388	10.4248	1.91093e-25	2.75052e-23	FAM156B	727866	2.8842e-23	90	113	98	433	379	519
142	ENSG00000110888	230.095	2.15136	0.206982	10.3939	2.64227e-25	3.7764e-23	CAPRIN2	65981	3.95994e-23	88	79	87	318	384	425
143	ENSG00000168028	12463.6	-1.36135	0.131064	-10.3869	2.84509e-25	4.00458e-23	RPSA	3921	4.19921e-23	17478	18764	17589	7410	7324	6218
144	ENSG00000147155	1688.68	-1.5801	0.152124	-10.3869	2.84537e-25	4.00458e-23	EBP	10682	4.19921e-23	2645	2541	2406	994	768	778
145	ENSG00000260565	78.884	4.13153	0.397785	10.3863	2.86112e-25	4.00458e-23	CTD-2270P14.1	NA	4.19921e-23	13	6	6	127	155	165
146	ENSG00000160075	1101.9	-1.41399	0.136482	-10.3602	3.76096e-25	5.228e-23	SSU72	29101	5.48209e-23	1629	1504	1675	610	566	628
147	ENSG00000109046	554.346	1.75296	0.16926	10.3566	3.90529e-25	5.39169e-23	WSB1	26118	5.65373e-23	266	257	238	764	991	811
148	ENSG00000134825	678.752	-1.6331	0.157769	-10.3512	4.13215e-25	5.66635e-23	TMEM258	693196	5.94175e-23	952	1054	1074	373	293	326
149	ENSG00000213719	3676.77	-1.32763	0.128427	-10.3376	4.76134e-25	6.48532e-23	CLIC1	1192	6.80053e-23	5340	4981	5454	2219	2132	1934
150	ENSG00000197603	396.713	2.75324	0.266442	10.3334	4.9777e-25	6.73483e-23	C5orf42	65250	7.06216e-23	124	97	85	453	655	965
151	ENSG00000107968	228.397	2.38458	0.231046	10.3208	5.67554e-25	7.62816e-23	MAP3K8	1326	7.9989e-23	55	100	65	364	402	383
152	ENSG00000142937	7599.97	-1.47608	0.143201	-10.3078	6.49818e-25	8.67635e-23	RPS8	6202	9.09804e-23	10212	11176	12154	4436	4075	3546
153	ENSG00000023839	4605.94	1.61455	0.156699	10.3035	6.79508e-25	9.01348e-23	ABCC2	1244	9.45156e-23	2542	2089	2171	5815	7466	7553
154	ENSG00000157106	1024.31	1.94579	0.1889	10.3006	7.00065e-25	9.22586e-23	SMG1	23049	9.67426e-23	407	521	339	1398	1626	1855
155	ENSG00000067048	377.003	1.74435	0.169418	10.2961	7.33671e-25	9.60636e-23	DDX3Y	8653	1.00733e-22	195	167	158	587	557	599
156	ENSG00000084623	3041.38	-1.39512	0.135612	-10.2875	8.02172e-25	1.04359e-22	EIF3I	8668	1.09432e-22	4351	4194	4678	1821	1694	1511
157	ENSG00000080546	125.052	2.73016	0.266042	10.2621	1.04379e-24	1.34929e-22	SESN1	27244	1.41487e-22	33	38	27	190	254	208
158	ENSG00000160211	19413.1	-1.87421	0.182671	-10.26	1.06693e-24	1.37047e-22	G6PD	2539	1.43708e-22	33011	29011	29494	10589	7956	6418
159	ENSG00000198931	1226.58	-2.00055	0.195188	-10.2493	1.19151e-24	1.52086e-22	APRT	353	1.59477e-22	1934	2122	1833	646	439	385
160	ENSG00000147123	1102.13	-1.67196	0.163399	-10.2324	1.41985e-24	1.80099e-22	NDUFB11	54539	1.88852e-22	1668	1541	1824	623	461	495
161	ENSG00000204174	178.032	2.6102	0.255776	10.205	1.88236e-24	2.37283e-22	NPY4R	5540	2.48816e-22	54	63	33	259	304	356
162	ENSG00000229117	2269.78	-1.88507	0.184791	-10.2011	1.96046e-24	2.45602e-22	RPL41	6171	2.57539e-22	3383	3660	3675	1262	834	804
163	ENSG00000108561	3672.28	-1.25826	0.123376	-10.1986	2.0107e-24	2.5035e-22	C1QBP	708	2.62518e-22	4879	5440	5220	2219	2179	2098
164	ENSG00000185246	255.416	1.92406	0.188846	10.1885	2.23117e-24	2.76107e-22	PRPF39	55015	2.89527e-22	111	97	111	377	393	443
165	ENSG00000261786	96.814	6.19142	0.607863	10.1856	2.30029e-24	2.81611e-22	RP4-555D20.2	NA	2.95298e-22	2	2	4	161	159	253
166	ENSG00000143314	1029.04	-1.39876	0.137329	-10.1854	2.3034e-24	2.81611e-22	MRPL24	79590	2.95298e-22	1453	1467	1557	611	545	542
167	ENSG00000048392	644.63	1.89848	0.186458	10.1818	2.39107e-24	2.9058e-22	RRM2B	50484	3.04703e-22	258	271	289	788	1174	1089
168	ENSG00000065978	8391.82	-1.56544	0.153815	-10.1774	2.5003e-24	3.02046e-22	YBX1	4904	3.16726e-22	12819	12592	12224	5046	4088	3581
169	ENSG00000146066	933.981	-1.6517	0.16236	-10.1731	2.6156e-24	3.14104e-22	HIGD2A	192286	3.2937e-22	1395	1290	1566	513	388	451
170	ENSG00000169914	132.227	2.89716	0.285022	10.1647	2.84966e-24	3.40199e-22	OTUD3	23252	3.56734e-22	30	39	25	208	196	296
171	ENSG00000134809	589.642	-1.78268	0.175674	-10.1477	3.39278e-24	4.02669e-22	TIMM10	26519	4.2224e-22	914	910	918	307	208	281
172	ENSG00000166436	94.9606	3.40258	0.335711	10.1354	3.84609e-24	4.53816e-22	TRIM66	9866	4.75873e-22	17	16	17	127	183	211
173	ENSG00000102265	1207.92	-1.50862	0.149016	-10.1239	4.32851e-24	5.07787e-22	TIMP1	7076	5.32467e-22	1786	1571	2006	660	621	603
174	ENSG00000187240	134.501	2.67356	0.264308	10.1153	4.72532e-24	5.49394e-22	DYNC2H1	79659	5.76096e-22	39	38	32	183	258	257
175	ENSG00000166441	8861.56	-1.43283	0.141653	-10.1151	4.73732e-24	5.49394e-22	RPL27A	6157	5.76096e-22	12181	12423	14195	5206	4952	4213
176	ENSG00000067082	529.104	1.83516	0.18146	10.1133	4.8231e-24	5.56163e-22	KLF6	1316	5.83194e-22	259	250	185	784	925	771
177	ENSG00000111640	41376.5	-1.40837	0.139376	-10.1048	5.25808e-24	6.02897e-22	GAPDH	2597	6.32199e-22	64276	57063	58986	25570	22164	20200
178	ENSG00000082258	245.379	2.33963	0.231755	10.0953	5.79642e-24	6.6089e-22	CCNT2	905	6.93011e-22	83	66	94	327	399	504
179	ENSG00000240342	1070.4	-1.87354	0.185814	-10.0829	6.57779e-24	7.45789e-22	RPS2P5	NA	7.82036e-22	1754	1797	1495	558	467	351
180	ENSG00000100889	796.725	-2.41501	0.239701	-10.0751	7.11807e-24	8.02563e-22	PCK2	5106	8.41569e-22	1069	1416	1541	344	244	165
181	ENSG00000167526	11835.5	-1.84378	0.18321	-10.0638	7.98856e-24	8.95733e-22	RPL13	6137	9.39268e-22	17175	19152	19214	6558	4970	3944
182	ENSG00000105518	370.623	-2.07924	0.206818	-10.0535	8.86658e-24	9.88721e-22	TMEM205	374882	1.03677e-21	612	555	632	186	114	125
183	ENSG00000105810	659.563	1.74399	0.173501	10.0518	9.02302e-24	1.00067e-21	CDK6	1021	1.0493e-21	301	356	253	917	1093	1038
184	ENSG00000144452	159.4	3.94718	0.392841	10.0478	9.39526e-24	1.03629e-21	ABCA12	26154	1.08665e-21	20	15	24	141	460	297
185	ENSG00000089335	255.407	2.28597	0.227592	10.0441	9.7493e-24	1.06952e-21	ZNF302	55900	1.12151e-21	78	73	110	340	461	471
186	ENSG00000179532	100.605	3.13719	0.312412	10.0418	9.9793e-24	1.08887e-21	DNHD1	144132	1.14179e-21	20	19	23	147	168	227
187	ENSG00000117419	469.858	-1.50574	0.150005	-10.0379	1.03822e-23	1.12678e-21	ERI3	79033	1.18154e-21	690	682	714	254	236	244
188	ENSG00000173559	238.878	2.19583	0.218986	10.0273	1.15652e-23	1.24849e-21	NABP1	64859	1.30917e-21	73	107	77	341	445	391
189	ENSG00000138629	333.318	-1.67569	0.167253	-10.0189	1.25915e-23	1.35209e-21	UBL7	84993	1.4178e-21	512	535	475	169	156	152
190	ENSG00000059804	493.663	2.21818	0.221645	10.0078	1.40837e-23	1.50437e-21	SLC2A3	6515	1.57748e-21	183	193	148	890	572	976
191	ENSG00000033867	224.952	2.07572	0.20753	10.002	1.49275e-23	1.58614e-21	SLC4A7	9497	1.66323e-21	93	84	81	309	409	373
192	ENSG00000223705	233.67	2.3917	0.239309	9.99419	1.6161e-23	1.70827e-21	NSUN5P1	155400	1.79129e-21	73	96	56	390	323	465
193	ENSG00000198618	2309.98	-1.5329	0.153423	-9.99131	1.66365e-23	1.74942e-21	PPIAP22	NA	1.83444e-21	3250	3653	3398	1401	1079	1078
194	ENSG00000142534	13959.8	-1.48467	0.148633	-9.98888	1.70504e-23	1.7837e-21	RPS11	6205	1.8704e-21	19285	19664	22761	8421	7142	6486
195	ENSG00000229119	2693.54	-1.30505	0.130736	-9.98232	1.82153e-23	1.89579e-21	CTB-63M22.1	NA	1.98793e-21	3911	3671	3924	1554	1675	1427
196	ENSG00000177954	7215.89	-1.35797	0.136438	-9.953	2.44691e-23	2.53367e-21	RPS27	6232	2.65681e-21	9562	9976	11607	4078	4284	3788
197	ENSG00000124222	276.441	1.79358	0.180307	9.94737	2.5893e-23	2.6675e-21	STX16	8675	2.79715e-21	110	129	133	414	439	433
198	ENSG00000235552	3055.51	-1.37818	0.138592	-9.94411	2.67548e-23	2.74237e-21	RPL6P27	NA	2.87565e-21	4170	4384	4686	1899	1639	1556
199	ENSG00000140988	20453.1	-1.81148	0.182192	-9.94272	2.71315e-23	2.76701e-21	RPS2	6187	2.90149e-21	31835	33878	29796	11471	8817	6922
200	ENSG00000144713	8752.84	-1.66594	0.167594	-9.94032	2.77923e-23	2.82022e-21	RPL32	6161	2.95729e-21	12295	12400	15238	4836	4344	3403
201	ENSG00000166147	272.624	2.68152	0.27024	9.92276	3.31458e-23	3.34674e-21	FBN1	2200	3.5094e-21	96	56	68	315	568	532
202	ENSG00000169692	344.871	-2.146	0.216293	-9.92173	3.34884e-23	3.36459e-21	AGPAT2	10555	3.52812e-21	543	565	581	171	114	96
203	ENSG00000105220	13218.5	-1.42604	0.143937	-9.90735	3.86752e-23	3.86657e-21	GPI	2821	4.05449e-21	20845	19147	17809	8167	6427	6916
204	ENSG00000125652	231.477	-2.27056	0.229311	-9.9017	4.0927e-23	4.07163e-21	ALKBH7	84266	4.26952e-21	379	385	388	108	70	60
205	ENSG00000074842	977.925	-1.43793	0.145542	-9.87982	5.09241e-23	5.04148e-21	MYDGF	56005	5.28651e-21	1398	1419	1469	591	513	477
206	ENSG00000168476	507.65	-1.96594	0.19902	-9.87811	5.17982e-23	5.10313e-21	REEP4	80346	5.35116e-21	762	897	766	264	161	195
207	ENSG00000214530	425.812	-2.93097	0.296907	-9.87167	5.52362e-23	5.41555e-21	STARD10	10809	5.67876e-21	850	582	827	149	98	49
208	ENSG00000143575	1205.72	-1.47501	0.149913	-9.8391	7.63914e-23	7.45367e-21	HAX1	10456	7.81594e-21	1608	1676	2037	614	636	664
209	ENSG00000002586	1065.77	-1.44193	0.146612	-9.83502	7.95541e-23	7.72513e-21	CD99	4267	8.10059e-21	1563	1466	1645	644	530	546
210	ENSG00000166986	2593.47	-1.64245	0.167037	-9.83288	8.1258e-23	7.85301e-21	MARS	102465454	8.23468e-21	3395	3914	4477	1483	1117	1174
211	ENSG00000077312	783.543	-1.76198	0.179312	-9.82635	8.67028e-23	8.33949e-21	SNRPA	6626	8.74481e-21	1139	1252	1240	448	308	314
212	ENSG00000167797	882.669	-1.92853	0.19636	-9.82143	9.10425e-23	8.7156e-21	CDK2AP2	10263	9.1392e-21	1345	1402	1447	487	291	323
213	ENSG00000189343	4247.21	-1.79358	0.182741	-9.81485	9.71856e-23	9.26001e-21	RPS2P46	NA	9.71007e-21	6663	6926	6190	2439	1775	1490
214	ENSG00000128342	568.332	2.42838	0.247695	9.80391	1.08312e-22	1.0272e-20	LIF	3976	1.07712e-20	138	226	171	1185	1053	637
215	ENSG00000086504	879.798	-1.76037	0.179581	-9.80266	1.09663e-22	1.03516e-20	MRPL28	10573	1.08548e-20	1324	1451	1302	483	409	311
216	ENSG00000137818	15381.6	-1.734	0.177278	-9.78126	1.35513e-22	1.27325e-20	RPLP1	6176	1.33514e-20	21747	25536	23677	8787	7031	5513
217	ENSG00000204271	129.67	2.60994	0.266869	9.77984	1.37422e-22	1.28524e-20	SPIN3	169981	1.34771e-20	39	30	40	180	261	227
218	ENSG00000135976	82.0978	4.127	0.422093	9.77747	1.40684e-22	1.30971e-20	ANKRD36	375248	1.37337e-20	12	9	5	108	147	211
219	ENSG00000182752	452.114	1.71428	0.175382	9.77458	1.4476e-22	1.34151e-20	PAPPA	5069	1.40671e-20	230	187	216	622	787	670
220	ENSG00000130175	3153.73	-1.74414	0.178485	-9.7719	1.48644e-22	1.37124e-20	PRKCSH	5589	1.43789e-20	5140	4539	4894	1858	1253	1238
221	ENSG00000130313	371.519	-1.77446	0.181619	-9.77026	1.51063e-22	1.38725e-20	PGLS	25796	1.45468e-20	604	523	599	199	150	154
222	ENSG00000166123	585.204	-1.97649	0.202336	-9.76836	1.53925e-22	1.40717e-20	GPT2	84706	1.47556e-20	748	857	1195	267	227	217
223	ENSG00000166851	1128.36	-2.09265	0.214339	-9.7633	1.61804e-22	1.47256e-20	PLK1	5347	1.54413e-20	1898	2184	1402	556	364	366
224	ENSG00000110063	235.813	-1.92658	0.197357	-9.76193	1.64003e-22	1.48592e-20	DCPS	28960	1.55813e-20	351	362	408	107	81	107
225	ENSG00000230606	72.3225	4.54087	0.465417	9.75657	1.72905e-22	1.55961e-20	AC159540.1	NA	1.63541e-20	6	8	4	101	134	181
226	ENSG00000185485	111.766	2.48438	0.254675	9.75511	1.75408e-22	1.57517e-20	SDHAP1	255812	1.65173e-20	34	37	31	189	181	200
227	ENSG00000104897	525.389	-2.04631	0.209778	-9.75466	1.76183e-22	1.57517e-20	SF3A2	8175	1.65173e-20	737	893	909	272	163	178
228	ENSG00000164587	7461.15	-1.3333	0.136693	-9.75401	1.77331e-22	1.57848e-20	RPS14	6208	1.6552e-20	10041	10623	11385	4651	4285	3782
229	ENSG00000124664	581.582	-2.2431	0.230028	-9.7514	1.8194e-22	1.61244e-20	SPDEF	25803	1.69081e-20	1120	852	909	274	138	197
230	ENSG00000224251	84.6162	4.43079	0.454395	9.75095	1.82742e-22	1.6125e-20	RP11-499O7.7	NA	1.69087e-20	4	11	7	102	156	227
231	ENSG00000184445	411.078	1.85482	0.190289	9.7474	1.89254e-22	1.66273e-20	KNTC1	9735	1.74355e-20	199	183	152	585	587	761
232	ENSG00000105193	15320.9	-1.53447	0.157548	-9.7397	2.04158e-22	1.78594e-20	RPS16	6217	1.87274e-20	21360	23003	23974	9520	7197	6872
233	ENSG00000159086	228.257	2.07877	0.21351	9.73617	2.11368e-22	1.84108e-20	PAXBP1	94104	1.93056e-20	106	84	71	328	373	407
234	ENSG00000186468	2980.57	-1.52769	0.156938	-9.73436	2.1517e-22	1.86618e-20	RPS23	6228	1.95688e-20	4147	4300	4832	1745	1586	1274
235	ENSG00000063177	8021.85	-1.92255	0.197568	-9.73109	2.22205e-22	1.919e-20	RPL18	6141	2.01227e-20	11952	12990	13143	4503	3009	2534
236	ENSG00000234975	987.288	-1.43211	0.147176	-9.73059	2.23289e-22	1.92019e-20	FTH1P2	NA	2.01352e-20	1593	1276	1452	551	527	524
237	ENSG00000205885	78.2757	3.69813	0.380319	9.72375	2.38818e-22	2.04507e-20	C1RL-AS1	283314	2.14446e-20	9	16	8	123	127	186
238	ENSG00000188153	468.166	2.16188	0.222379	9.72162	2.43861e-22	2.07948e-20	COL4A5	1287	2.18055e-20	202	164	146	645	1008	644
239	ENSG00000224861	809.002	-1.73677	0.178678	-9.72006	2.47633e-22	2.1028e-20	YBX1P1	NA	2.20501e-20	1283	1216	1235	471	332	317
240	ENSG00000257093	578.943	1.98703	0.204449	9.71895	2.50346e-22	2.11699e-20	KIAA1147	57189	2.21988e-20	249	252	198	702	948	1124
241	ENSG00000179632	1177.12	-1.7754	0.182787	-9.71291	2.65632e-22	2.23693e-20	MAF1	84232	2.34565e-20	1791	1847	1828	687	455	453
242	ENSG00000155850	568.798	1.64882	0.169771	9.71206	2.67859e-22	2.24637e-20	SLC26A2	1836	2.35555e-20	309	288	228	805	925	859
243	ENSG00000147133	457.909	1.72973	0.178134	9.71032	2.72491e-22	2.2758e-20	TAF1	6872	2.38641e-20	219	217	200	607	679	825
244	ENSG00000139289	558.841	1.55839	0.160691	9.69808	3.07233e-22	2.55545e-20	PHLDA1	22822	2.67965e-20	269	258	324	812	886	804
245	ENSG00000090615	781.932	1.37567	0.141873	9.6965	3.12016e-22	2.58464e-20	GOLGA3	2802	2.71026e-20	443	429	433	1123	1058	1205
246	ENSG00000105677	1517.09	-1.59188	0.164207	-9.69434	3.18691e-22	2.6292e-20	TMEM147	10430	2.75698e-20	2442	2312	2082	911	676	680
247	ENSG00000149806	2258.01	-1.80295	0.186244	-9.68055	3.64745e-22	2.99696e-20	FAU	2197	3.14262e-20	3532	3467	3531	1319	890	808
248	ENSG00000196419	5615.04	-1.20469	0.124508	-9.67564	3.82673e-22	3.13159e-20	XRCC6	2547	3.28379e-20	7809	7823	7864	3398	3651	3144
249	ENSG00000009413	197.804	2.4639	0.25485	9.66806	4.1211e-22	3.35894e-20	REV3L	5980	3.5222e-20	72	70	40	264	364	378
250	ENSG00000101255	2158.41	-2.40897	0.249936	-9.63833	5.50762e-22	4.47108e-20	TRIB3	57761	4.68839e-20	2591	3215	5093	906	613	532
251	ENSG00000116001	385.09	1.88623	0.196118	9.61783	6.72358e-22	5.43645e-20	TIA1	7072	5.70068e-20	188	152	152	524	566	729
252	ENSG00000137154	16455.9	-1.23526	0.12845	-9.61669	6.79808e-22	5.47488e-20	RPS6	6194	5.74097e-20	21314	24075	23911	9946	10401	9089
253	ENSG00000107223	1898.53	-1.8227	0.189724	-9.60711	7.46138e-22	5.98533e-20	EDF1	8721	6.27623e-20	2703	2891	3287	1075	656	780
254	ENSG00000163191	5548.81	-1.33494	0.138983	-9.60506	7.611e-22	6.08131e-20	S100A11	6282	6.37687e-20	7587	7235	9020	3283	3177	2991
255	ENSG00000173457	1643.95	-2.07226	0.215972	-9.59504	8.38844e-22	6.67621e-20	PPP1R14B	26472	7.00069e-20	2614	2982	2373	882	501	511
256	ENSG00000079616	586.822	-1.75771	0.183198	-9.59456	8.42785e-22	6.68137e-20	KIF22	3835	7.0061e-20	894	1013	811	323	223	257
257	ENSG00000101444	4004.39	-1.43684	0.14984	-9.58917	8.87991e-22	7.01236e-20	AHCY	191	7.35318e-20	5880	6089	5578	2310	2379	1792
258	ENSG00000168615	3116	1.56107	0.162816	9.58792	8.98761e-22	7.0699e-20	ADAM9	8754	7.41352e-20	1668	1750	1313	4275	5336	4353
259	ENSG00000213741	2931.95	-1.72334	0.179953	-9.57663	1.0026e-21	7.85628e-20	RPS29	6235	8.23812e-20	4171	4913	4419	1698	1325	1066
260	ENSG00000115902	511.292	-1.99586	0.208453	-9.57464	1.02211e-21	7.97834e-20	SLC1A4	6509	8.3661e-20	727	682	1044	237	172	206
261	ENSG00000115268	3615.16	-2.25214	0.235419	-9.56652	1.10564e-21	8.59728e-20	RPS15	6209	9.01513e-20	5604	6568	5757	1865	979	918
262	ENSG00000221983	3489.13	-1.50381	0.157506	-9.54767	1.32648e-21	1.02751e-19	UBA52	7311	1.07745e-19	4921	5126	5431	2138	1814	1505
263	ENSG00000099341	2922.3	-1.34469	0.140965	-9.53918	1.43971e-21	1.11098e-19	PSMD8	5714	1.16498e-19	4123	4381	4077	1886	1520	1546
264	ENSG00000104904	2731.67	-1.56735	0.164376	-9.53515	1.49667e-21	1.15057e-19	OAZ1	4946	1.20649e-19	3955	4465	3835	1667	1294	1173
265	ENSG00000132485	253.389	1.74253	0.182772	9.53386	1.51536e-21	1.16054e-19	ZRANB2	9406	1.21695e-19	105	124	121	380	399	392
266	ENSG00000172493	676.311	1.80262	0.18915	9.53008	1.57166e-21	1.19913e-19	AFF1	4299	1.25741e-19	334	297	273	847	1281	1026
267	ENSG00000133624	63.5507	3.71831	0.3902	9.52924	1.58433e-21	1.20427e-19	ZNF767P	79970	1.2628e-19	6	11	9	120	115	120
268	ENSG00000145912	889.816	-1.7873	0.187731	-9.52053	1.72291e-21	1.30472e-19	NHP2	55651	1.36813e-19	1415	1488	1238	507	367	325
269	ENSG00000170906	707.387	-1.81294	0.190488	-9.51738	1.77598e-21	1.33991e-19	NDUFA3	4696	1.40503e-19	1053	1037	1215	402	268	269
270	ENSG00000168159	1155.07	-1.55072	0.163026	-9.51209	1.86865e-21	1.4046e-19	RNF187	149603	1.47287e-19	1753	1699	1715	711	506	545
271	ENSG00000175334	2290.62	-1.5326	0.161131	-9.51154	1.87863e-21	1.40689e-19	BANF1	8815	1.47527e-19	3183	3510	3522	1426	1033	1070
272	ENSG00000188846	5046.2	-1.31567	0.138385	-9.50734	1.95592e-21	1.45939e-19	RPL14	9045	1.53032e-19	6735	6979	7886	3041	3045	2591
273	ENSG00000164180	155.638	2.43195	0.255961	9.50125	2.07386e-21	1.54172e-19	TMEM161B	153396	1.61665e-19	58	34	53	223	259	307
274	ENSG00000142089	393.995	-1.73719	0.182902	-9.49792	2.1412e-21	1.58597e-19	IFITM3	10410	1.66306e-19	619	556	644	218	173	154
275	ENSG00000197989	100.223	2.70983	0.285477	9.4923	2.25991e-21	1.66781e-19	SNHG12	85028	1.74887e-19	20	33	27	193	169	160
276	ENSG00000162244	5539.26	-1.48488	0.156472	-9.48972	2.31645e-21	1.70335e-19	RPL29	6159	1.78613e-19	7395	8182	8911	3372	2907	2468
277	ENSG00000226415	621.29	-1.75411	0.184855	-9.4891	2.33029e-21	1.70734e-19	TPI1P1	NA	1.79032e-19	1035	1004	837	347	270	235
278	ENSG00000152527	147.23	2.72527	0.28724	9.48776	2.36054e-21	1.72328e-19	PLEKHH2	130271	1.80703e-19	30	35	51	190	324	253
279	ENSG00000102882	456.662	-1.6296	0.17207	-9.47054	2.78403e-21	2.02515e-19	MAPK3	5595	2.12358e-19	712	684	676	266	206	197
280	ENSG00000214975	764.254	-1.5093	0.159375	-9.47009	2.79608e-21	2.02666e-19	PPIAP29	NA	2.12516e-19	1060	1123	1210	455	347	390
281	ENSG00000169189	476.679	-1.53168	0.161819	-9.46539	2.92473e-21	2.11237e-19	NSMCE1	197370	2.21503e-19	670	663	792	259	229	246
282	ENSG00000112697	906.906	1.55143	0.163935	9.46371	2.97193e-21	2.13884e-19	TMEM30A	55754	2.24279e-19	536	417	430	1201	1393	1464
283	ENSG00000157827	339.151	1.78236	0.188371	9.46197	3.02209e-21	2.16719e-19	FMNL2	114793	2.27252e-19	147	178	133	461	552	564
284	ENSG00000197343	674.077	1.91816	0.202731	9.4616	3.03268e-21	2.16719e-19	ZNF655	79027	2.27252e-19	287	304	255	773	1170	1256
285	ENSG00000172531	2101.56	-1.7077	0.180516	-9.4601	3.07648e-21	2.19078e-19	PPP1CA	5499	2.29726e-19	3282	3358	3015	1264	875	815
286	ENSG00000148303	9093.93	-1.26417	0.13367	-9.45742	3.15648e-21	2.23989e-19	RPL7A	6130	2.34875e-19	12262	13238	13025	5858	5426	4755
287	ENSG00000234771	66.493	3.86128	0.408686	9.44805	3.45213e-21	2.44115e-19	SLC25A25-AS1	NA	2.55979e-19	8	13	5	126	102	145
288	ENSG00000215021	3293.47	-1.33348	0.141192	-9.44442	3.57382e-21	2.51843e-19	PHB2	11331	2.64083e-19	4602	4931	4615	2142	1714	1758
289	ENSG00000213465	320.299	-2.09334	0.221685	-9.44289	3.62649e-21	2.5467e-19	ARL2	402	2.67047e-19	492	553	513	166	103	95
290	ENSG00000159335	3436.71	-2.08361	0.220893	-9.43268	3.9974e-21	2.79749e-19	PTMS	5763	2.93346e-19	5430	5422	5832	1889	978	1068
291	ENSG00000183718	114.945	2.38831	0.253496	9.42148	4.44772e-21	3.10194e-19	TRIM52	84851	3.2527e-19	38	37	36	170	206	203
292	ENSG00000230979	147.482	-2.26551	0.240488	-9.42049	4.49008e-21	3.12076e-19	AC079250.1	NA	3.27243e-19	221	283	229	63	45	44
293	ENSG00000197956	12300.8	-1.30338	0.138372	-9.41942	4.53598e-21	3.1419e-19	S100A6	6277	3.29461e-19	16824	15700	20000	7314	7015	6952
294	ENSG00000099812	2635.49	-1.59436	0.16934	-9.4151	4.72612e-21	3.26247e-19	MISP	126353	3.42103e-19	4256	3906	3718	1613	1234	1087
295	ENSG00000163479	2224.8	-1.26366	0.134368	-9.40445	5.23017e-21	3.59818e-19	SSR2	6746	3.77306e-19	3136	3059	3229	1196	1443	1286
296	ENSG00000186166	102.031	2.77091	0.2947	9.4025	5.32829e-21	3.6533e-19	CCDC84	338657	3.83086e-19	27	26	25	158	153	223
297	ENSG00000088325	2241.17	-1.23073	0.130912	-9.4012	5.39434e-21	3.68613e-19	TPX2	22974	3.86529e-19	3263	3309	2857	1340	1368	1310
298	ENSG00000101294	2783.53	-1.25147	0.133171	-9.39747	5.58913e-21	3.80642e-19	HM13	81502	3.99143e-19	4021	3691	4050	1757	1494	1689
299	ENSG00000013275	2506.15	-1.22629	0.130618	-9.3884	6.09169e-21	4.13481e-19	PSMC4	5704	4.33577e-19	3418	3361	3756	1597	1414	1490
300	ENSG00000121716	63.697	4.17017	0.444236	9.38728	6.157e-21	4.16521e-19	PILRB	102466747	4.36765e-19	6	10	4	122	96	144
301	ENSG00000135541	252.576	2.23586	0.238641	9.36914	7.3127e-21	4.9306e-19	AHI1	54806	5.17024e-19	87	82	96	293	456	501
302	ENSG00000130159	365.268	-2.1884	0.233663	-9.36561	7.56122e-21	5.08129e-19	ECSIT	51295	5.32825e-19	592	618	588	187	114	93
303	ENSG00000054690	264.954	2.82678	0.301988	9.36059	7.92951e-21	5.3112e-19	PLEKHH1	57475	5.56934e-19	78	73	45	348	346	700
304	ENSG00000175390	2043.09	-1.24363	0.13288	-9.359	8.04916e-21	5.37361e-19	EIF3F	8665	5.63478e-19	2762	2799	3057	1250	1273	1116
305	ENSG00000141971	252.173	-1.79367	0.191774	-9.35304	8.51622e-21	5.66677e-19	MVB12A	93343	5.94219e-19	376	395	404	133	109	97
306	ENSG00000104823	1920.64	-1.75293	0.187439	-9.35201	8.59962e-21	5.70357e-19	ECH1	1891	5.98078e-19	2814	2741	3332	1113	835	689
307	ENSG00000116406	365.477	1.97699	0.211431	9.35054	8.72041e-21	5.76484e-19	EDEM3	80267	6.04503e-19	159	174	111	477	627	644
308	ENSG00000114391	5092.54	-1.39431	0.14913	-9.34966	8.79298e-21	5.79395e-19	RPL24	6152	6.07555e-19	6856	7573	7707	3115	2949	2356
309	ENSG00000188818	64.447	3.62196	0.387428	9.34873	8.87042e-21	5.82605e-19	ZDHHC11	79844	6.10922e-19	9	13	7	127	101	130
310	ENSG00000175581	476.213	-1.51441	0.162059	-9.3448	9.20592e-21	6.02691e-19	MRPL48	51642	6.31983e-19	666	698	753	237	226	278
311	ENSG00000102531	513.729	1.71232	0.183374	9.33784	9.83175e-21	6.41593e-19	FNDC3A	22862	6.72776e-19	248	228	244	625	862	875
312	ENSG00000104853	3035.67	-1.47557	0.158113	-9.3324	1.03502e-20	6.73263e-19	CLPTM1	1209	7.05985e-19	4919	4125	4353	1895	1403	1519
313	ENSG00000133935	626.154	-1.31318	0.140728	-9.33137	1.04516e-20	6.77685e-19	C14orf1	11161	7.10622e-19	905	909	865	356	355	368
314	ENSG00000214078	1214.57	-1.55145	0.166285	-9.33006	1.05809e-20	6.83885e-19	CPNE1	8904	7.17124e-19	1609	1828	1997	726	534	593
315	ENSG00000143321	4866.07	-1.21614	0.130475	-9.32087	1.15386e-20	7.43413e-19	HDGF	3068	7.79545e-19	7006	7124	6281	3126	2728	2931
316	ENSG00000114374	171.454	2.34003	0.251114	9.31857	1.17917e-20	7.57317e-19	USP9Y	8287	7.94125e-19	60	57	52	218	282	359
317	ENSG00000183617	277.989	-1.93442	0.207704	-9.31336	1.23855e-20	7.92943e-19	MRPL54	116541	8.31482e-19	398	442	482	145	108	93
318	ENSG00000205426	13833.4	-1.89155	0.203274	-9.30543	1.33447e-20	8.51291e-19	KRT81	3887	8.92666e-19	21492	23582	20306	7827	4195	5599
319	ENSG00000065427	2839.35	-1.1802	0.126833	-9.30515	1.33807e-20	8.51291e-19	KARS	3735	8.92666e-19	3808	3780	4232	1741	1797	1678
320	ENSG00000105698	1050.78	-1.57019	0.168841	-9.29984	1.40658e-20	8.92082e-19	USF2	7392	9.3544e-19	1517	1522	1679	648	476	464
321	ENSG00000267680	69.2301	3.616	0.388881	9.29846	1.42489e-20	9.00876e-19	ZNF224	7767	9.44661e-19	11	7	13	107	116	161
322	ENSG00000114770	154.061	2.13354	0.229532	9.29519	1.46948e-20	9.26182e-19	ABCC5	10057	9.71197e-19	50	64	58	235	285	233
323	ENSG00000168090	1436.94	-1.29071	0.138916	-9.29132	1.5238e-20	9.57448e-19	COPS6	10980	1.00398e-18	2050	2013	2058	930	810	761
324	ENSG00000170315	2877.3	-1.33212	0.143394	-9.28992	1.544e-20	9.67142e-19	UBB	7314	1.01415e-18	4060	4031	4265	1888	1534	1485
325	ENSG00000206573	72.3976	3.12005	0.335884	9.28909	1.55616e-20	9.71762e-19	THUMPD3-AS1	440944	1.01899e-18	13	15	17	134	113	143
326	ENSG00000172757	9811.85	-1.42594	0.153651	-9.28039	1.68855e-20	1.0512e-18	CFL1	1072	1.10229e-18	13991	14992	13921	6286	5204	4476
327	ENSG00000163728	204.051	2.36873	0.25534	9.27675	1.74734e-20	1.08447e-18	TTC14	151613	1.13718e-18	86	50	62	259	379	388
328	ENSG00000169727	1266.06	-1.7	0.183377	-9.27052	1.85246e-20	1.14621e-18	GPS1	2873	1.20192e-18	1865	2101	1843	764	519	505
329	ENSG00000176340	1661.33	-1.55117	0.16735	-9.269	1.87902e-20	1.15911e-18	COX8A	1351	1.21545e-18	2553	2287	2593	1005	685	846
330	ENSG00000131018	181.64	2.13961	0.23115	9.25637	2.11503e-20	1.30074e-18	SYNE1	23345	1.36396e-18	64	65	72	259	364	265
331	ENSG00000108298	13990.5	-1.40359	0.151662	-9.25473	2.14763e-20	1.3168e-18	RPL19	6143	1.3808e-18	19280	19000	22637	8569	7932	6524
332	ENSG00000281649	447.328	1.71574	0.185529	9.24784	2.29071e-20	1.4003e-18	EBLN3P	100506710	1.46836e-18	237	207	183	574	717	767
333	ENSG00000149136	3890.61	-1.30601	0.141294	-9.24316	2.39332e-20	1.45863e-18	SSRP1	6749	1.52952e-18	5548	6052	5022	2421	2019	2283
334	ENSG00000087460	5623.96	-1.32831	0.143925	-9.2292	2.72662e-20	1.65679e-18	GNAS	2778	1.73731e-18	7954	7358	8821	3563	2860	3187
335	ENSG00000125818	2119.01	-1.24182	0.134578	-9.22746	2.77133e-20	1.67893e-18	PSMF1	9491	1.76053e-18	3005	3061	2870	1349	1299	1130
336	ENSG00000013441	225.073	2.3171	0.251176	9.225	2.83572e-20	1.71283e-18	CLK1	1195	1.79607e-18	59	62	106	303	408	414
337	ENSG00000083845	8614.37	-1.76633	0.191511	-9.22312	2.88571e-20	1.73785e-18	RPS5	6193	1.82231e-18	12777	14757	12412	5045	3755	2942
338	ENSG00000105701	1065.77	-1.92692	0.209268	-9.20792	3.32517e-20	1.99083e-18	FKBP8	23770	2.08759e-18	1716	1694	1654	615	348	368
339	ENSG00000179967	662.662	-2.20562	0.239535	-9.20791	3.32541e-20	1.99083e-18	PPP1R14BP3	NA	2.08759e-18	1060	1186	1022	349	174	185
340	ENSG00000183207	1756.83	-1.75921	0.19109	-9.20619	3.37906e-20	2.017e-18	RUVBL2	10856	2.11503e-18	2617	2907	2614	1051	723	630
341	ENSG00000249859	143.518	2.18548	0.237496	9.2022	3.50695e-20	2.0872e-18	PVT1	100302185	2.18864e-18	41	54	60	212	241	253
342	ENSG00000126267	4139.07	-1.41597	0.153891	-9.20107	3.54396e-20	2.10124e-18	COX6B1	1340	2.20336e-18	5967	5459	6640	2578	1945	2247
343	ENSG00000103275	987.028	-1.77311	0.192712	-9.20085	3.55124e-20	2.10124e-18	UBE2I	7329	2.20336e-18	1441	1606	1535	588	384	368
344	ENSG00000173113	1047.77	-1.7397	0.189097	-9.20004	3.57811e-20	2.11098e-18	TRMT112	51504	2.21358e-18	1548	1641	1650	613	364	471
345	ENSG00000104979	687.487	-1.6801	0.182626	-9.19969	3.58986e-20	2.11178e-18	C19orf53	28974	2.21441e-18	949	1085	1111	409	289	283
346	ENSG00000137955	620.278	1.48498	0.161435	9.1986	3.62631e-20	2.12705e-18	RABGGTB	5876	2.23043e-18	364	285	330	836	958	949
347	ENSG00000179091	3022.56	-1.79222	0.194887	-9.19622	3.70758e-20	2.16845e-18	CYC1	1537	2.27385e-18	4640	4911	4523	1819	1075	1169
348	ENSG00000187514	6400.35	-1.59593	0.17355	-9.19577	3.72325e-20	2.17136e-18	PTMA	100302285	2.27689e-18	9684	10304	8868	4011	2846	2688
349	ENSG00000136271	1516.13	-1.28842	0.140133	-9.19425	3.77636e-20	2.19603e-18	DDX56	54606	2.30276e-18	2095	2151	2209	991	820	831
350	ENSG00000250479	1134.87	-2.01221	0.218894	-9.19262	3.83403e-20	2.22319e-18	CHCHD10	400916	2.33124e-18	1702	1929	1826	630	400	322
351	ENSG00000166471	279.493	1.70796	0.185822	9.19138	3.87849e-20	2.24256e-18	TMEM41B	440026	2.35156e-18	131	150	113	453	406	426
352	ENSG00000178982	4110.62	-1.26814	0.138189	-9.17682	4.43994e-20	2.55991e-18	EIF3K	27335	2.68432e-18	6068	5395	5965	2707	2260	2269
353	ENSG00000132507	5706.89	-1.86923	0.203718	-9.17557	4.49191e-20	2.58253e-18	EIF5A	1984	2.70805e-18	8175	10530	8178	3264	2187	1907
354	ENSG00000105699	915.38	-2.10433	0.229397	-9.1733	4.58766e-20	2.63013e-18	LSR	51599	2.75796e-18	1544	1379	1534	499	289	247
355	ENSG00000010438	93.5016	-2.82078	0.307522	-9.1726	4.61736e-20	2.6397e-18	PRSS3	5646	2.768e-18	144	147	200	30	25	15
356	ENSG00000065268	440.935	-2.23068	0.243241	-9.17065	4.70156e-20	2.68028e-18	WDR18	57418	2.81055e-18	719	776	686	229	122	113
357	ENSG00000094914	846.673	-1.55639	0.169786	-9.16678	4.87377e-20	2.77068e-18	AAAS	8086	2.90534e-18	1346	1326	1119	478	352	459
358	ENSG00000137962	432.213	1.76489	0.192573	9.16481	4.96323e-20	2.81365e-18	ARHGAP29	9411	2.9504e-18	216	188	185	533	691	781
359	ENSG00000074071	1351.56	-1.86081	0.203296	-9.15322	5.52625e-20	3.1241e-18	MRPS34	65993	3.27594e-18	2128	2297	1935	788	507	455
360	ENSG00000142657	15146.4	-1.15298	0.126012	-9.14975	5.70649e-20	3.21704e-18	PGD	5226	3.37339e-18	21845	20349	20494	10246	8871	9073
361	ENSG00000177156	2920.99	-1.34132	0.146781	-9.13829	6.34491e-20	3.56704e-18	TALDO1	6888	3.7404e-18	4259	4174	4134	1928	1572	1459
362	ENSG00000007080	555.071	-2.02711	0.221927	-9.13412	6.59382e-20	3.69673e-18	CCDC124	115098	3.8764e-18	830	1007	838	304	182	170
363	ENSG00000178567	226.139	1.80098	0.197221	9.13177	6.73879e-20	3.76135e-18	EPM2AIP1	9852	3.94416e-18	107	97	98	318	340	397
364	ENSG00000087191	1503.43	-1.21522	0.133077	-9.13165	6.74616e-20	3.76135e-18	PSMC5	5705	3.94416e-18	2075	2077	2154	961	927	827
365	ENSG00000099624	784.672	-2.57792	0.28288	-9.11313	8.00361e-20	4.45023e-18	ATP5D	513	4.66652e-18	1336	1290	1407	373	153	149
366	ENSG00000169100	5709.95	-1.86737	0.205067	-9.10615	8.53598e-20	4.73327e-18	SLC25A6	293	4.96332e-18	9180	8830	8880	3416	1972	1981
367	ENSG00000139239	517.593	-1.95708	0.214936	-9.10541	8.59404e-20	4.75248e-18	RPL14P1	NA	4.98346e-18	713	877	881	280	200	155
368	ENSG00000141934	809.331	-1.75461	0.192921	-9.09498	9.46072e-20	5.21753e-18	PLPP2	8612	5.47112e-18	1356	1223	1168	471	283	356
369	ENSG00000270231	61.5724	3.61786	0.397861	9.09327	9.61036e-20	5.2857e-18	NBPF8	NA	5.54259e-18	11	11	5	112	101	129
370	ENSG00000115020	303.432	1.74964	0.192656	9.08164	1.06954e-19	5.86655e-18	PIKFYVE	200576	6.15168e-18	145	148	123	393	497	514
371	ENSG00000132481	422.756	-1.78472	0.196604	-9.07776	1.10837e-19	6.05236e-18	TRIM47	91107	6.34652e-18	601	671	695	243	168	159
372	ENSG00000184983	1086.62	-1.48309	0.163378	-9.07766	1.10938e-19	6.05236e-18	NDUFA6	4700	6.34652e-18	1548	1439	1816	647	497	574
373	ENSG00000172869	359.188	1.99073	0.219685	9.06174	1.28382e-19	6.98528e-18	DMXL1	1657	7.32478e-18	158	153	122	420	629	673
374	ENSG00000197157	3915.49	-1.2307	0.13583	-9.06061	1.2972e-19	7.03923e-18	SND1	27044	7.38135e-18	5846	5425	5202	2464	2472	2084
375	ENSG00000185825	2297.79	-1.21078	0.13364	-9.06005	1.30395e-19	7.05697e-18	BCAP31	10134	7.39996e-18	3319	3021	3287	1518	1324	1317
376	ENSG00000108344	1784.68	-1.30938	0.144543	-9.05879	1.31905e-19	7.1197e-18	PSMD3	5709	7.46573e-18	2477	2604	2549	1179	928	971
377	ENSG00000185651	1756.62	-1.18298	0.130662	-9.05373	1.38168e-19	7.43799e-18	UBE2L3	7332	7.79949e-18	2306	2460	2551	1133	1075	1015
378	ENSG00000140105	1860.3	-1.1024	0.121783	-9.05218	1.40145e-19	7.52448e-18	WARS	7453	7.89018e-18	2561	2530	2524	1180	1167	1199
379	ENSG00000218426	1818.87	-1.43406	0.158456	-9.0502	1.42705e-19	7.63116e-18	RP11-475C16.1	NA	8.00205e-18	2464	2520	2983	1118	985	844
380	ENSG00000173511	504.439	-1.63093	0.180212	-9.05006	1.42884e-19	7.63116e-18	VEGFB	7423	8.00205e-18	809	750	729	301	206	231
381	ENSG00000264717	166.851	2.55074	0.281981	9.04579	1.48585e-19	7.91476e-18	CH17-360D5.1	105379861	8.29944e-18	49	70	27	245	282	328
382	ENSG00000197958	7363.44	-1.34017	0.148181	-9.04418	1.50791e-19	8.01128e-18	RPL12	6136	8.40065e-18	10151	10245	11276	4597	4420	3492
383	ENSG00000100982	406.703	-1.58471	0.175224	-9.04387	1.51218e-19	8.01296e-18	PCIF1	63935	8.40241e-18	629	596	606	238	171	200
384	ENSG00000129562	1411.63	-1.26084	0.139428	-9.04293	1.52524e-19	8.06112e-18	DAD1	1603	8.45291e-18	2163	1806	2007	876	798	820
385	ENSG00000196205	9333.35	-1.20702	0.133636	-9.03212	1.68372e-19	8.87561e-18	EEF1A1P5	NA	9.30698e-18	12837	12372	13866	5664	6170	5091
386	ENSG00000102181	1190.14	-1.20313	0.133415	-9.01791	1.91714e-19	1.00799e-17	CD99L2	83692	1.05698e-17	1720	1579	1680	749	735	678
387	ENSG00000129255	919.872	-1.33649	0.148239	-9.01579	1.95456e-19	1.02501e-17	MPDU1	9526	1.07483e-17	1417	1242	1295	568	468	530
388	ENSG00000128311	620.468	-1.57565	0.174823	-9.01283	2.00799e-19	1.05031e-17	TST	7263	1.10136e-17	904	964	921	381	293	261
389	ENSG00000197728	1901.41	-1.28513	0.142637	-9.00974	2.06541e-19	1.07757e-17	RPS26	101929876	1.12994e-17	2730	2948	2411	1180	1115	1023
390	ENSG00000196458	189.361	1.94864	0.216405	9.00462	2.16419e-19	1.12621e-17	ZNF605	100289635	1.18095e-17	67	72	95	275	297	329
391	ENSG00000135940	1050.6	-1.44861	0.160946	-9.00061	2.24472e-19	1.16513e-17	COX5B	1329	1.22176e-17	1457	1472	1685	623	469	598
392	ENSG00000127914	819.436	1.82019	0.202293	8.99779	2.30307e-19	1.19237e-17	AKAP9	10142	1.25032e-17	384	332	369	906	1455	1471
393	ENSG00000131469	5291	-1.2155	0.135094	-8.99745	2.31012e-19	1.19298e-17	RPL27	6155	1.25096e-17	6958	7599	7633	3263	3457	2835
394	ENSG00000168439	4236.19	-1.14398	0.127213	-8.99262	2.41411e-19	1.24351e-17	STIP1	10963	1.30395e-17	6119	5994	5386	2770	2535	2613
395	ENSG00000125740	270.098	2.70516	0.301376	8.97604	2.807e-19	1.44223e-17	FOSB	2354	1.51232e-17	95	31	89	429	558	419
396	ENSG00000142669	514.665	-1.80909	0.201781	-8.96563	3.08515e-19	1.57975e-17	SH3BGRL3	83442	1.65653e-17	714	831	858	285	230	169
397	ENSG00000230551	83.5977	3.03258	0.338252	8.96545	3.09022e-19	1.57975e-17	CTB-89H12.4	NA	1.65653e-17	22	15	18	133	120	194
398	ENSG00000141349	667.7	-1.49471	0.166789	-8.96168	3.19768e-19	1.63058e-17	G6PC3	92579	1.70983e-17	1003	916	1038	402	292	355
399	ENSG00000131143	3726.94	-1.27629	0.142438	-8.96033	3.2372e-19	1.64659e-17	COX4I1	1327	1.72662e-17	5166	4799	5863	2401	2067	2066
400	ENSG00000175130	1174.31	-1.50006	0.167455	-8.95795	3.30775e-19	1.67657e-17	MARCKSL1	65108	1.75806e-17	1735	1867	1604	741	572	527
401	ENSG00000214021	55.5451	4.04636	0.451714	8.95778	3.31267e-19	1.67657e-17	TTLL3	26140	1.75806e-17	6	7	6	83	113	119
402	ENSG00000172270	6636.63	-1.63455	0.182499	-8.95651	3.35113e-19	1.69182e-17	BSG	682	1.77405e-17	10117	9424	10579	4073	2454	3173
403	ENSG00000047346	196.652	2.33832	0.261204	8.9521	3.4877e-19	1.7564e-17	FAM214A	56204	1.84176e-17	67	48	79	237	389	359
404	ENSG00000182379	93.4904	-2.64581	0.295672	-8.94845	3.60498e-19	1.81097e-17	NXPH4	11247	1.89898e-17	176	171	136	36	20	21
405	ENSG00000108465	58.0593	5.06085	0.565997	8.94149	3.83974e-19	1.92414e-17	CDK5RAP3	80279	2.01766e-17	0	7	4	91	118	129
406	ENSG00000155657	61.4739	5.0007	0.560708	8.91854	4.72483e-19	2.36183e-17	TTN	7273	2.47663e-17	4	5	2	82	109	167
407	ENSG00000177853	328.751	2.05774	0.230904	8.91168	5.02655e-19	2.50648e-17	ZNF518A	9849	2.6283e-17	135	114	133	402	484	704
408	ENSG00000232573	571.534	-1.44191	0.161823	-8.91043	5.08349e-19	2.52866e-17	RPL3P4	NA	2.65156e-17	768	827	913	320	333	269
409	ENSG00000182326	400.729	1.88419	0.211522	8.9078	5.20541e-19	2.58298e-17	C1S	716	2.70852e-17	178	203	130	512	651	729
410	ENSG00000120889	1929.54	1.26167	0.141686	8.90471	5.3524e-19	2.64944e-17	TNFRSF10B	8795	2.7782e-17	1134	1150	1124	2554	3098	2518
411	ENSG00000179913	366.528	-1.73889	0.195362	-8.90089	5.54023e-19	2.72916e-17	B3GNT3	10331	2.8618e-17	639	508	545	181	193	132
412	ENSG00000005486	696.32	-1.52422	0.171244	-8.90088	5.54035e-19	2.72916e-17	RHBDD2	57414	2.8618e-17	1102	928	1070	415	298	364
413	ENSG00000061987	465.743	1.72224	0.19359	8.8963	5.77413e-19	2.83744e-17	MON2	23041	2.97534e-17	246	206	198	564	777	804
414	ENSG00000270629	86.1617	2.635	0.296251	8.8945	5.86804e-19	2.87661e-17	NBPF14	100996763	3.01642e-17	21	30	21	134	165	146
415	ENSG00000145592	7374.54	-1.40716	0.158278	-8.8904	6.08868e-19	2.97204e-17	RPL37	6167	3.11649e-17	9790	10273	12069	4643	4048	3424
416	ENSG00000116670	292.799	-1.9098	0.214818	-8.89034	6.09199e-19	2.97204e-17	MAD2L2	10459	3.11649e-17	417	522	449	160	101	108
417	ENSG00000118181	3482.92	-1.30748	0.147215	-8.88143	6.60043e-19	3.21237e-17	RPS25	6230	3.3685e-17	4619	4568	5697	2115	2072	1826
418	ENSG00000162086	145.765	2.17215	0.244673	8.87776	6.82185e-19	3.31219e-17	ZNF75A	7627	3.47317e-17	56	40	63	208	267	240
419	ENSG00000100865	491.473	-1.33303	0.150183	-8.87603	6.92886e-19	3.35612e-17	CINP	51550	3.51923e-17	678	692	741	290	281	267
420	ENSG00000105323	4387.35	-1.38392	0.156187	-8.86063	7.95612e-19	3.84451e-17	HNRNPUL1	11100	4.03136e-17	6376	6906	5749	2868	2262	2162
421	ENSG00000125970	1226.65	-1.47728	0.166737	-8.85998	8.00305e-19	3.858e-17	RALY	22913	4.04551e-17	1744	1871	1801	793	596	554
422	ENSG00000182199	1600.82	-1.44694	0.163327	-8.85917	8.06095e-19	3.87671e-17	SHMT2	6472	4.06512e-17	2146	2631	2251	986	868	723
423	ENSG00000175220	1150.11	-1.22749	0.138623	-8.85486	8.37892e-19	4.0201e-17	ARHGAP1	392	4.21549e-17	1640	1644	1552	757	645	663
424	ENSG00000089009	11621.5	-1.08359	0.122402	-8.85271	8.54172e-19	4.08854e-17	RPL6	6128	4.28726e-17	15461	15251	16663	7531	7802	7020
425	ENSG00000184076	1147.74	-1.39578	0.15774	-8.8486	8.86264e-19	4.23217e-17	UQCR10	29796	4.43787e-17	1530	1601	1860	714	626	556
426	ENSG00000168306	206.939	-2.47936	0.280671	-8.83369	1.01275e-18	4.82457e-17	ACOX2	8309	5.05906e-17	366	328	359	86	32	71
427	ENSG00000116898	980.962	-1.37022	0.155117	-8.83344	1.01507e-18	4.82457e-17	MRPS15	64960	5.05906e-17	1307	1312	1625	509	587	546
428	ENSG00000130724	1370.59	-1.40978	0.159608	-8.83279	1.02093e-18	4.84106e-17	CHMP2A	27243	5.07634e-17	1928	1741	2306	827	687	735
429	ENSG00000130731	328.796	-1.92217	0.217655	-8.83127	1.03496e-18	4.89614e-17	METTL26	84326	5.13411e-17	505	555	501	186	112	113
430	ENSG00000173599	538.794	-1.46157	0.165688	-8.82124	1.13203e-18	5.34292e-17	PC	5091	5.6026e-17	868	732	772	328	260	273
431	ENSG00000122912	185.093	1.87276	0.212345	8.81943	1.15043e-18	5.40612e-17	SLC25A16	8034	5.66887e-17	78	84	76	256	332	285
432	ENSG00000172183	398.734	-1.89024	0.214327	-8.8194	1.15075e-18	5.40612e-17	ISG20	3669	5.66887e-17	617	549	718	219	160	129
433	ENSG00000154265	84.7417	2.85671	0.324085	8.81468	1.20028e-18	5.62081e-17	ABCA5	23461	5.894e-17	20	16	26	114	161	172
434	ENSG00000097021	594.822	-1.90072	0.215635	-8.81452	1.20199e-18	5.62081e-17	ACOT7	11332	5.894e-17	944	930	941	333	249	171
435	ENSG00000119333	682.603	-1.87296	0.212552	-8.81175	1.23207e-18	5.74823e-17	WDR34	89891	6.02761e-17	1140	1186	891	390	237	250
436	ENSG00000174444	30250.6	-1.17289	0.133137	-8.80967	1.25515e-18	5.84251e-17	RPL4	6124	6.12647e-17	40294	40239	45204	19383	19723	16661
437	ENSG00000049130	295.307	1.87463	0.212819	8.80856	1.26762e-18	5.88704e-17	KITLG	4254	6.17316e-17	145	112	122	382	569	441
438	ENSG00000182899	2725.21	-1.17711	0.133658	-8.80682	1.28741e-18	5.96529e-17	RPL35A	6165	6.25521e-17	3534	3746	4058	1755	1722	1536
439	ENSG00000278864	54.3908	4.01708	0.456372	8.80222	1.34139e-18	6.20125e-17	RP11-45M22.2	NA	6.50264e-17	6	9	4	106	83	119
440	ENSG00000186567	55.8112	3.45359	0.392606	8.79659	1.41039e-18	6.50543e-17	CEACAM19	56971	6.82161e-17	8	9	11	94	108	105
441	ENSG00000170442	1792.69	-1.65004	0.187591	-8.79594	1.4185e-18	6.528e-17	KRT86	3892	6.84527e-17	2871	2842	2444	1104	674	821
442	ENSG00000110717	1082.36	-1.78138	0.202547	-8.79488	1.43202e-18	6.57532e-17	NDUFS8	102465669	6.89489e-17	1689	1681	1662	665	403	394
443	ENSG00000231167	374.863	-1.46972	0.167211	-8.78964	1.50036e-18	6.87355e-17	YBX1P2	NA	7.20762e-17	546	530	577	217	175	205
444	ENSG00000283041	4055.05	-1.26675	0.144237	-8.7824	1.60022e-18	7.31454e-17	RP11-371A22.1	NA	7.67004e-17	5695	6004	5489	2636	2474	2032
445	ENSG00000150093	13274	1.22125	0.139124	8.77814	1.662e-18	7.57093e-17	ITGB1	3688	7.93889e-17	8343	8259	7304	16541	20553	18645
446	ENSG00000141499	385.775	-1.68095	0.191496	-8.77802	1.66378e-18	7.57093e-17	WRAP53	55135	7.93889e-17	612	641	512	221	154	176
447	ENSG00000181381	216.446	2.0424	0.232704	8.77685	1.68121e-18	7.63313e-17	DDX60L	91351	8.00412e-17	93	98	62	284	383	379
448	ENSG00000108639	1869.48	-1.50384	0.171347	-8.77659	1.68505e-18	7.6335e-17	SYNGR2	9144	8.00451e-17	3052	2776	2466	1187	833	904
449	ENSG00000234648	869.843	-2.20373	0.251119	-8.77565	1.69914e-18	7.68017e-17	AL162151.3	NA	8.05345e-17	1290	1596	1402	467	257	206
450	ENSG00000100599	272.676	-1.81028	0.20638	-8.77157	1.76193e-18	7.94633e-17	RIN3	79890	8.33254e-17	414	426	434	152	117	93
451	ENSG00000129317	273.829	1.80825	0.206231	8.76807	1.81747e-18	8.17861e-17	PUS7L	83448	8.57611e-17	142	110	113	350	457	472
452	ENSG00000146701	4458.99	-1.37134	0.156413	-8.76743	1.82792e-18	8.20744e-17	MDH2	4191	8.60634e-17	6665	6335	6296	2917	2498	2043
453	ENSG00000233476	3356.34	-1.10724	0.126342	-8.76384	1.88702e-18	8.4541e-17	EEF1A1P6	NA	8.86499e-17	4452	4618	4684	2205	2221	1958
454	ENSG00000149273	14407.6	-1.55481	0.177458	-8.7616	1.92505e-18	8.6055e-17	RPS3	6188	9.02375e-17	20375	22182	21937	8994	7423	5535
455	ENSG00000137166	394.515	-1.85872	0.212167	-8.76061	1.94205e-18	8.66237e-17	FOXP4	116113	9.08339e-17	590	686	580	219	168	124
456	ENSG00000172500	600.298	-1.30173	0.148623	-8.75863	1.97634e-18	8.79603e-17	FIBP	9158	9.22354e-17	850	895	818	376	332	331
457	ENSG00000069011	456.863	-2.33546	0.266674	-8.75773	1.99225e-18	8.8474e-17	PITX1	5307	9.27741e-17	730	758	800	238	106	108
458	ENSG00000158856	632.375	-1.72007	0.196698	-8.74473	2.23559e-18	9.90474e-17	DMTN	2039	1.03861e-16	1058	784	1068	298	235	351
459	ENSG00000141522	1905.68	-2.11616	0.241999	-8.7445	2.2401e-18	9.90474e-17	ARHGDIA	396	1.03861e-16	3340	3486	2466	1044	574	524
460	ENSG00000153822	510.575	1.79514	0.205367	8.74111	2.30821e-18	1.01837e-16	KCNJ16	3773	1.06787e-16	250	188	247	603	852	923
461	ENSG00000084207	7604.9	-1.52577	0.174609	-8.7382	2.36864e-18	1.04203e-16	GSTP1	2950	1.09268e-16	11230	11433	11205	4981	3620	3161
462	ENSG00000100316	14325.7	-1.30792	0.149681	-8.73803	2.3721e-18	1.04203e-16	RPL3	6122	1.09268e-16	19656	20260	21310	9064	8883	6781
463	ENSG00000105671	394.6	-1.80696	0.207031	-8.72798	2.5927e-18	1.13647e-16	DDX49	54555	1.19171e-16	620	634	588	232	158	136
464	ENSG00000103089	926.341	-1.45853	0.167186	-8.72401	2.68529e-18	1.17453e-16	FA2H	79152	1.23161e-16	1506	1288	1281	563	512	408
465	ENSG00000180008	338.499	1.48436	0.170204	8.72103	2.75681e-18	1.20321e-16	SOCS4	122809	1.26169e-16	178	168	188	457	509	530
466	ENSG00000003756	250.099	1.80779	0.207372	8.7176	2.84149e-18	1.23751e-16	RBM5	10181	1.29766e-16	104	94	136	341	405	421
467	ENSG00000103148	464.292	-1.54115	0.177064	-8.70392	3.20615e-18	1.39334e-16	NPRL3	8131	1.46106e-16	667	718	689	289	214	210
468	ENSG00000163382	1512.68	-1.27883	0.146935	-8.70339	3.22116e-18	1.39687e-16	NAXE	128240	1.46476e-16	2232	2140	2056	1004	778	866
469	ENSG00000100941	1129.66	1.19134	0.136953	8.69893	3.35019e-18	1.44973e-16	PNN	5411	1.52019e-16	683	667	715	1500	1516	1698
470	ENSG00000065518	1210.54	-1.22822	0.141248	-8.69548	3.45352e-18	1.49126e-16	NDUFB4	4710	1.56374e-16	1623	1589	1878	708	700	765
471	ENSG00000100097	2547.39	-2.23977	0.257602	-8.69469	3.47781e-18	1.49856e-16	LGALS1	3956	1.57139e-16	4015	4587	4012	1314	851	505
472	ENSG00000198242	4607.24	-1.68621	0.194137	-8.68567	3.76527e-18	1.61899e-16	RPL23A	6147	1.69767e-16	6565	6866	7659	2822	2124	1607
473	ENSG00000106628	1453.12	-1.74715	0.201211	-8.68316	3.84912e-18	1.64838e-16	POLD2	5425	1.72849e-16	2452	2430	1836	868	588	545
474	ENSG00000196262	12782.4	-1.05563	0.121572	-8.68314	3.84987e-18	1.64838e-16	PPIA	5478	1.72849e-16	16597	17418	17768	8842	7868	8201
475	ENSG00000172893	2686.57	-1.59643	0.183884	-8.68173	3.89788e-18	1.66542e-16	DHCR7	1717	1.74636e-16	4346	4413	3355	1663	1204	1139
476	ENSG00000039319	435.449	1.87795	0.2164	8.67813	4.02327e-18	1.71538e-16	ZFYVE16	9765	1.79876e-16	192	176	191	486	720	848
477	ENSG00000146648	1491.09	1.37155	0.158052	8.67781	4.03448e-18	1.71656e-16	EGFR	1956	1.79999e-16	841	905	747	1861	2447	2145
478	ENSG00000106153	3168.87	-1.33209	0.153557	-8.6749	4.1391e-18	1.75433e-16	CHCHD2	51142	1.83959e-16	4251	4642	4716	2123	1725	1556
479	ENSG00000139579	750.583	-1.38042	0.159131	-8.67473	4.14517e-18	1.75433e-16	NABP2	79035	1.83959e-16	1086	1159	1009	450	354	446
480	ENSG00000160948	579.104	-1.56638	0.180571	-8.67462	4.14918e-18	1.75433e-16	VPS28	51160	1.83959e-16	831	841	926	363	257	257
481	ENSG00000160213	1243.47	-1.24431	0.143472	-8.67286	4.21406e-18	1.77805e-16	CSTB	1476	1.86447e-16	1821	1606	1820	812	683	719
482	ENSG00000175756	759.113	-2.00389	0.231233	-8.66612	4.47111e-18	1.88248e-16	AURKAIP1	54998	1.97397e-16	1170	1303	1174	441	234	234
483	ENSG00000108107	8309.84	-1.928	0.222482	-8.66589	4.48011e-18	1.88248e-16	RPL28	102465483	1.97397e-16	12178	13895	13411	4989	2845	2541
484	ENSG00000140264	1379.68	-1.53934	0.177645	-8.66527	4.50454e-18	1.88758e-16	SERF2	10169	1.97932e-16	1845	1969	2345	853	581	684
485	ENSG00000244754	302.839	2.03674	0.23505	8.66511	4.51085e-18	1.88758e-16	N4BP2L2	10443	1.97932e-16	107	112	138	344	514	603
486	ENSG00000109920	453.884	1.71844	0.198475	8.65821	4.79235e-18	2.00125e-16	FNBP4	23360	2.09852e-16	251	219	164	619	665	805
487	ENSG00000198755	5035.56	-1.22618	0.141633	-8.65743	4.82514e-18	2.01081e-16	RPL10A	4736	2.10854e-16	7009	7318	6839	3293	3177	2577
488	ENSG00000233762	188.972	-1.99407	0.230408	-8.65454	4.94885e-18	2.05813e-16	AC007969.5	NA	2.15816e-16	277	330	300	97	74	56
489	ENSG00000203880	166.074	2.11871	0.244932	8.65021	5.14049e-18	2.13346e-16	PCMTD2	55251	2.23715e-16	54	62	71	208	288	314
490	ENSG00000171858	3116.52	-1.71754	0.198663	-8.64554	5.35538e-18	2.21811e-16	RPS21	6227	2.32591e-16	4489	4728	5124	1939	1330	1090
491	ENSG00000106804	1958.06	1.88216	0.217756	8.64345	5.45388e-18	2.25431e-16	C5	727	2.36387e-16	881	690	937	2061	3474	3707
492	ENSG00000089916	328.213	1.67165	0.193422	8.64251	5.49917e-18	2.26841e-16	GPATCH2L	55668	2.37866e-16	171	148	151	438	598	462
493	ENSG00000183011	458.385	-1.9822	0.22949	-8.6374	5.75056e-18	2.3673e-16	NAA38	84316	2.48235e-16	713	811	672	262	146	146
494	ENSG00000065054	419.249	-1.96605	0.227726	-8.63338	5.95641e-18	2.44707e-16	SLC9A3R2	9351	2.56601e-16	554	625	825	225	151	136
495	ENSG00000197345	547.265	-1.24818	0.144618	-8.63091	6.08657e-18	2.49549e-16	MRPL21	219927	2.61678e-16	788	768	754	327	311	335
496	ENSG00000164611	844.324	-1.35992	0.157637	-8.62691	6.30309e-18	2.57906e-16	PTTG1	9232	2.70441e-16	1211	1287	1149	548	418	453
497	ENSG00000110651	1962.45	-1.35215	0.156776	-8.62471	6.42541e-18	2.62382e-16	CD81	975	2.75134e-16	2946	2806	2709	1319	1033	962
498	ENSG00000147459	1683.32	1.61199	0.186934	8.62332	6.50383e-18	2.6505e-16	DOCK5	80005	2.77933e-16	790	980	720	2194	3148	2268
499	ENSG00000258890	249.447	2.04039	0.236711	8.61979	6.70783e-18	2.72816e-16	CEP95	90799	2.86076e-16	82	90	121	314	389	500
500	ENSG00000100697	507.563	1.62168	0.188443	8.60567	7.58691e-18	3.07953e-16	DICER1	23405	3.2292e-16	258	285	203	652	778	869
501	ENSG00000164663	73.6054	2.93132	0.340689	8.6041	7.69194e-18	3.11593e-16	USP49	25862	3.26737e-16	20	22	9	111	144	136
502	ENSG00000170500	166.975	2.06176	0.240053	8.58878	8.79013e-18	3.5537e-16	LONRF2	164832	3.72642e-16	63	65	65	244	225	339
503	ENSG00000034677	1456.67	1.44463	0.168328	8.58226	9.30307e-18	3.75359e-16	RNF19A	25897	3.93603e-16	891	625	832	1953	2316	2123
504	ENSG00000178295	272.382	1.8058	0.210428	8.58155	9.35993e-18	3.76905e-16	GEN1	348654	3.95223e-16	131	123	109	360	388	523
505	ENSG00000081052	617.356	1.88052	0.219218	8.57832	9.62704e-18	3.86893e-16	COL4A4	1286	4.05697e-16	365	203	222	888	937	1089
506	ENSG00000151835	391.394	1.60626	0.187317	8.57508	9.90199e-18	3.97156e-16	SACS	26278	4.16459e-16	209	201	171	494	678	597
507	ENSG00000204568	851.681	-1.24159	0.144953	-8.56548	1.07624e-17	4.30815e-16	MRPS18B	28973	4.51754e-16	1180	1144	1267	545	514	459
508	ENSG00000100348	895.444	-1.37896	0.161018	-8.56406	1.08963e-17	4.35316e-16	TXN2	25828	4.56474e-16	1341	1225	1315	544	539	408
509	ENSG00000173575	654.229	1.40787	0.164433	8.56197	1.10954e-17	4.424e-16	CHD2	100422995	4.63901e-16	317	337	421	890	1007	953
510	ENSG00000149932	690.942	-1.40495	0.164102	-8.56148	1.11428e-17	4.43417e-16	TMEM219	124446	4.64968e-16	1005	958	1047	447	361	328
511	ENSG00000251369	86.4871	2.66331	0.311258	8.55659	1.16257e-17	4.61728e-16	ZNF550	162972	4.84169e-16	22	16	33	129	156	163
512	ENSG00000237758	254.736	-1.65421	0.19335	-8.55556	1.17302e-17	4.64113e-16	BANF1P3	NA	4.8667e-16	359	401	401	146	108	114
513	ENSG00000099822	827.56	-1.68246	0.196651	-8.55554	1.17315e-17	4.64113e-16	HCN2	610	4.8667e-16	1335	1185	1266	498	288	393
514	ENSG00000157741	195.51	2.13565	0.249647	8.55469	1.18184e-17	4.66642e-16	UBN2	254048	4.89322e-16	66	79	72	237	306	413
515	ENSG00000139428	526.485	-1.29096	0.151009	-8.54894	1.24227e-17	4.88865e-16	MMAB	326625	5.12625e-16	788	720	734	329	295	292
516	ENSG00000161016	16646.1	-1.65282	0.193338	-8.54888	1.24294e-17	4.88865e-16	RPL8	102465978	5.12625e-16	24373	26223	25183	10558	7610	5930
517	ENSG00000151914	1765.2	1.83739	0.215042	8.54433	1.29286e-17	5.07515e-16	DST	667	5.32182e-16	842	756	717	1947	3740	2589
518	ENSG00000116754	760.7	1.30365	0.152635	8.54093	1.33141e-17	5.21639e-16	SRSF11	9295	5.46992e-16	481	419	415	985	1092	1172
519	ENSG00000151632	37986.7	-1.22701	0.143669	-8.54051	1.33629e-17	5.22544e-16	AKR1C2	1646	5.47941e-16	54661	45264	59772	22395	21955	23873
520	ENSG00000149177	899.347	1.18392	0.138634	8.53991	1.34326e-17	5.24261e-16	PTPRJ	5795	5.49741e-16	541	578	530	1174	1277	1296
521	ENSG00000171658	61.2934	3.60714	0.422494	8.53773	1.36885e-17	5.3322e-16	NMRAL1P1	NA	5.59135e-16	8	17	2	111	127	102
522	ENSG00000244503	50.9822	4.21163	0.493476	8.53461	1.40633e-17	5.4677e-16	RP11-278L15.6	NA	5.73344e-16	4	9	2	77	109	104
523	ENSG00000116221	1035.91	-1.17004	0.137103	-8.53402	1.41345e-17	5.4849e-16	MRPL37	51253	5.75148e-16	1476	1491	1336	673	626	613
524	ENSG00000130204	2235.67	-1.79798	0.210693	-8.53365	1.41797e-17	5.49191e-16	TOMM40	10452	5.75883e-16	3480	3869	3069	1377	794	825
525	ENSG00000251095	70.6918	4.33211	0.507943	8.52872	1.47981e-17	5.71853e-16	RP11-115D19.1	NA	5.99647e-16	8	5	7	100	225	79
526	ENSG00000137288	402.993	-1.60963	0.188735	-8.52854	1.48211e-17	5.71853e-16	UQCC2	84300	5.99647e-16	547	630	645	245	173	178
527	ENSG00000142227	580.941	-1.56175	0.183178	-8.52584	1.51711e-17	5.84244e-16	EMP3	2014	6.1264e-16	749	989	867	332	310	240
528	ENSG00000179950	2154.38	-1.54272	0.18097	-8.52475	1.53141e-17	5.87658e-16	PUF60	22827	6.1622e-16	3160	3438	3026	1415	957	930
529	ENSG00000267121	86.8553	3.52739	0.413783	8.52472	1.53176e-17	5.87658e-16	CTD-2020K17.1	NA	6.1622e-16	12	9	20	132	101	246
530	ENSG00000203950	661.636	-1.34598	0.157942	-8.52202	1.56794e-17	6.00402e-16	FAM127B	26071	6.29583e-16	923	959	967	433	354	334
531	ENSG00000259820	55.9008	3.88498	0.456097	8.51787	1.62511e-17	6.21123e-16	AC083843.1	NA	6.51311e-16	6	10	5	84	89	141
532	ENSG00000106400	547.104	-1.52023	0.178485	-8.51743	1.63137e-17	6.22342e-16	ZNHIT1	10467	6.52589e-16	781	719	934	330	253	265
533	ENSG00000170581	278.718	1.87181	0.219832	8.51475	1.66944e-17	6.3567e-16	STAT2	6773	6.66565e-16	111	119	129	337	431	545
534	ENSG00000180879	1864.59	-1.3571	0.159406	-8.51349	1.6878e-17	6.4146e-16	SSR4	6748	6.72637e-16	2580	2415	3053	1185	1043	912
535	ENSG00000164405	1468.18	-1.21604	0.142865	-8.51183	1.71211e-17	6.49482e-16	UQCRQ	27089	6.81049e-16	1940	1896	2322	909	852	889
536	ENSG00000212802	2376.85	-1.57426	0.184981	-8.51037	1.73376e-17	6.56466e-16	RPL15P3	NA	6.88372e-16	3302	3770	3605	1545	1077	962
537	ENSG00000174744	692.161	-1.65611	0.194669	-8.50731	1.78012e-17	6.72766e-16	BRMS1	25855	7.05464e-16	1076	1068	1010	438	274	288
538	ENSG00000077549	1869.24	-1.21652	0.143003	-8.50693	1.78597e-17	6.73722e-16	CAPZB	832	7.06467e-16	2612	2644	2585	1226	1182	966
539	ENSG00000169045	3217.3	1.56364	0.183876	8.50376	1.83545e-17	6.91103e-16	HNRNPH1	3187	7.24692e-16	1600	1989	1291	4898	4085	5441
540	ENSG00000170889	5126.16	-1.58363	0.186346	-8.49832	1.9235e-17	7.22916e-16	RPS9	6203	7.58051e-16	7167	8466	7430	3304	2375	2015
541	ENSG00000010256	2029.31	-1.46418	0.172348	-8.49548	1.9712e-17	7.39471e-16	UQCRC1	7384	7.75412e-16	3044	2944	2949	1363	930	945
542	ENSG00000100075	1470.93	-1.80958	0.213084	-8.49232	2.02552e-17	7.58448e-16	SLC25A1	6576	7.9531e-16	2427	2402	2038	888	601	469
543	ENSG00000076864	437.057	-2.10981	0.248559	-8.48813	2.09989e-17	7.84848e-16	RAP1GAP	5909	8.22994e-16	835	529	766	202	185	106
544	ENSG00000135164	330.798	1.90374	0.224288	8.48791	2.10385e-17	7.84882e-16	DMTF1	9988	8.23029e-16	119	131	168	419	483	664
545	ENSG00000198034	14364	-1.16704	0.137595	-8.48174	2.21851e-17	8.25973e-16	RPS4X	6191	8.66118e-16	18613	19373	21644	8216	9875	8464
546	ENSG00000173193	457.974	1.60905	0.189712	8.48155	2.22213e-17	8.25973e-16	PARP14	54625	8.66118e-16	233	245	199	553	784	734
547	ENSG00000011258	110.08	2.17841	0.256853	8.48113	2.23026e-17	8.27479e-16	MBTD1	54799	8.67696e-16	41	40	38	157	206	177
548	ENSG00000055163	737.74	1.48807	0.175561	8.47608	2.32917e-17	8.62601e-16	CYFIP2	26999	9.04525e-16	353	400	411	974	1317	972
549	ENSG00000103363	1149.37	-1.6846	0.198769	-8.47514	2.34804e-17	8.68006e-16	TCEB2	6923	9.10193e-16	1768	1624	1869	730	448	457
550	ENSG00000042753	1395.13	-1.66959	0.197024	-8.47404	2.37027e-17	8.7463e-16	AP2S1	1175	9.1714e-16	2111	2156	2103	888	608	506
551	ENSG00000126457	2405.42	-1.62068	0.191363	-8.46913	2.47228e-17	9.10616e-16	PRMT1	3276	9.54874e-16	3619	4095	3177	1528	1040	973
552	ENSG00000125651	873.968	-1.37561	0.16252	-8.46427	2.57764e-17	9.47704e-16	GTF2F1	2962	9.93764e-16	1252	1230	1304	582	451	426
553	ENSG00000126432	2442.4	-1.36777	0.161611	-8.46336	2.59772e-17	9.53357e-16	PRDX5	25824	9.99692e-16	3525	3201	3836	1627	1184	1281
554	ENSG00000142507	1602.41	-1.43852	0.169976	-8.4631	2.60364e-17	9.53806e-16	PSMB6	5694	1.00016e-15	2315	2351	2358	1075	791	724
555	ENSG00000130725	1409.08	-1.51975	0.179621	-8.46085	2.65432e-17	9.7062e-16	UBE2M	9040	1.01779e-15	2058	2159	2052	934	632	620
556	ENSG00000156535	1144.3	1.52226	0.179952	8.45928	2.69042e-17	9.82051e-16	CD109	135228	1.02978e-15	572	570	632	1418	2127	1547
557	ENSG00000103043	554.139	-1.4734	0.174214	-8.45743	2.73329e-17	9.95335e-16	VAC14	55697	1.04371e-15	849	787	810	352	244	283
558	ENSG00000112306	6876.27	-1.29341	0.152935	-8.45729	2.73662e-17	9.95335e-16	RPS12	6206	1.04371e-15	9557	9773	9973	4428	4295	3231
559	ENSG00000157456	767.207	-1.26293	0.149406	-8.45302	2.83872e-17	1.03062e-15	CCNB2	9133	1.08071e-15	1048	1198	1004	480	424	450
560	ENSG00000162430	878.728	-1.44878	0.17158	-8.44373	3.07375e-17	1.11396e-15	SEPN1	57190	1.1681e-15	1363	1342	1155	566	446	401
561	ENSG00000230076	123.263	-2.07456	0.245827	-8.4391	3.19789e-17	1.15688e-15	RPL10P6	NA	1.21311e-15	182	206	211	60	41	41
562	ENSG00000118762	358.198	1.81295	0.214901	8.43617	3.27901e-17	1.18412e-15	PKD2	5311	1.24167e-15	197	166	113	491	565	618
563	ENSG00000115234	1448.11	-1.2403	0.147028	-8.43581	3.28915e-17	1.18438e-15	SNX17	9784	1.24194e-15	2030	2214	1861	963	814	807
564	ENSG00000126934	1113.42	-1.83969	0.218083	-8.43573	3.2914e-17	1.18438e-15	MAP2K2	5605	1.24194e-15	1819	1747	1656	678	434	346
565	ENSG00000277701	50.49	4.56184	0.540902	8.43377	3.34712e-17	1.2023e-15	RP11-734K23.9	NA	1.26073e-15	4	5	4	73	88	130
566	ENSG00000198743	172.167	1.94018	0.230091	8.43223	3.39129e-17	1.21601e-15	SLC5A3	6526	1.27511e-15	67	88	58	242	267	310
567	ENSG00000160867	999.598	-1.69395	0.200908	-8.4315	3.41271e-17	1.22153e-15	FGFR4	2264	1.2809e-15	1655	1595	1332	621	372	422
568	ENSG00000100162	206.619	-2.29282	0.272155	-8.42469	3.6172e-17	1.29245e-15	CENPM	79019	1.35527e-15	357	405	268	101	60	49
569	ENSG00000260032	2560.19	1.15544	0.137153	8.42442	3.62549e-17	1.29313e-15	NORAD	647979	1.35598e-15	1596	1482	1681	3181	3777	3644
570	ENSG00000139343	802.257	-1.30256	0.154733	-8.41812	3.82575e-17	1.36217e-15	SNRPF	6636	1.42837e-15	1008	1206	1212	503	423	462
571	ENSG00000133657	569.595	1.63501	0.194313	8.41432	3.9519e-17	1.40462e-15	ATP13A3	79572	1.47289e-15	333	295	204	786	919	882
572	ENSG00000197774	65.5723	3.21786	0.382505	8.4126	4.01025e-17	1.42287e-15	EME2	197342	1.49202e-15	9	14	15	155	91	109
573	ENSG00000143819	3375.99	-1.44663	0.171975	-8.41184	4.03638e-17	1.42964e-15	EPHX1	2052	1.49912e-15	5407	3771	5642	1884	1848	1705
574	ENSG00000147854	365.537	1.56692	0.186295	8.41097	4.06638e-17	1.43776e-15	UHRF2	115426	1.50764e-15	212	158	184	494	527	620
575	ENSG00000173039	913.814	-1.30311	0.155	-8.40718	4.20001e-17	1.48242e-15	RELA	5970	1.55447e-15	1250	1350	1303	601	528	452
576	ENSG00000185236	581.822	-1.69537	0.201683	-8.4061	4.23874e-17	1.49349e-15	RAB11B	9230	1.56608e-15	858	903	907	358	205	260
577	ENSG00000159388	218.63	2.16919	0.258186	8.40165	4.40231e-17	1.54448e-15	BTG2	7832	1.61954e-15	83	87	69	379	454	240
578	ENSG00000236552	286.791	-1.80012	0.214258	-8.40164	4.40273e-17	1.54448e-15	RPL13AP5	728658	1.61954e-15	383	484	471	163	118	102
579	ENSG00000179630	108.934	2.53921	0.302231	8.40155	4.40626e-17	1.54448e-15	LACC1	144811	1.61954e-15	33	38	25	141	244	173
580	ENSG00000130255	2613.03	-1.94931	0.23206	-8.40001	4.46439e-17	1.56215e-15	RPL36	25873	1.63808e-15	3888	4542	4025	1553	949	723
581	ENSG00000111639	1379.96	-1.14126	0.135917	-8.39669	4.59238e-17	1.60417e-15	MRPL51	51258	1.68214e-15	1916	1843	1938	884	779	919
582	ENSG00000169499	151.576	1.84529	0.219945	8.38978	4.87042e-17	1.69837e-15	PLEKHA2	59339	1.78091e-15	65	65	68	235	213	264
583	ENSG00000156411	1445.7	-1.20851	0.144099	-8.38665	5.00174e-17	1.74117e-15	C14orf2	9556	1.8258e-15	2034	1783	2237	905	833	882
584	ENSG00000113742	320.833	1.43638	0.171304	8.38501	5.07203e-17	1.76262e-15	CPEB4	80315	1.84829e-15	172	155	192	462	466	477
585	ENSG00000268412	131.004	-2.07331	0.247308	-8.38353	5.13634e-17	1.78191e-15	TRMT112P6	NA	1.86852e-15	207	220	207	61	35	54
586	ENSG00000157399	780.906	-1.4847	0.177268	-8.37545	5.50148e-17	1.90363e-15	ARSE	415	1.99615e-15	1221	930	1300	419	361	453
587	ENSG00000196139	20934.4	-1.16012	0.138516	-8.37535	5.50593e-17	1.90363e-15	AKR1C3	8644	1.99615e-15	30286	24825	31665	12774	12743	13313
588	ENSG00000205534	77.5496	2.46452	0.294293	8.37438	5.55145e-17	1.9161e-15	SMG1P2	NA	2.00923e-15	27	22	23	125	136	133
589	ENSG00000144579	453.899	-1.74302	0.208384	-8.36442	6.041e-17	2.08153e-15	CTDSP1	58190	2.1827e-15	684	692	722	274	153	200
590	ENSG00000089685	1105.45	-1.68488	0.201629	-8.35634	6.46923e-17	2.22531e-15	BIRC5	332	2.33346e-15	1643	1977	1439	682	449	442
591	ENSG00000178741	2652.11	-1.18941	0.142388	-8.35332	6.63723e-17	2.27923e-15	COX5A	9377	2.39001e-15	3566	3434	4061	1544	1510	1796
592	ENSG00000005469	112.044	2.30202	0.275593	8.35294	6.65832e-17	2.28261e-15	CROT	54677	2.39355e-15	32	43	38	144	214	200
593	ENSG00000156508	55744.3	-1.00858	0.120767	-8.35142	6.74481e-17	2.30836e-15	EEF1A1	1915	2.42055e-15	74976	73142	75301	36111	39878	35058
594	ENSG00000182195	570.013	-1.31364	0.157331	-8.34952	6.854e-17	2.34178e-15	LDOC1	23641	2.4556e-15	814	843	782	365	329	287
595	ENSG00000143549	5094.41	-1.02898	0.123402	-8.33843	7.52816e-17	2.5678e-15	TPM3	7170	2.6926e-15	7137	7023	6354	3458	3303	3292
596	ENSG00000164054	1002.71	-1.36422	0.163758	-8.33072	8.03521e-17	2.73365e-15	SHISA5	51246	2.86651e-15	1481	1419	1433	677	523	483
597	ENSG00000171863	7170.72	-1.18085	0.141748	-8.33063	8.04132e-17	2.73365e-15	RPS7	6201	2.86651e-15	9052	10375	10430	4833	4465	3871
598	ENSG00000146433	245.235	1.52133	0.182778	8.32337	8.54995e-17	2.90169e-15	TMEM181	57583	3.04272e-15	137	128	115	350	379	363
599	ENSG00000197756	6120.03	-1.44679	0.173907	-8.31936	8.84364e-17	2.99636e-15	RPL37A	6168	3.14199e-15	8327	8418	10121	4004	3192	2659
600	ENSG00000138448	773.721	1.5297	0.183955	8.31562	9.12745e-17	3.08736e-15	ITGAV	3685	3.23741e-15	368	470	356	991	1371	1086
601	ENSG00000223572	651.501	-1.56994	0.188924	-8.30992	9.57634e-17	3.23381e-15	CKMT1A	548596	3.39098e-15	969	830	1125	314	274	397
602	ENSG00000174021	94.222	-3.21421	0.386883	-8.30797	9.73554e-17	3.27949e-15	GNG5	2787	3.43888e-15	155	200	156	35	11	8
603	ENSG00000206530	54.7629	5.59061	0.672943	8.30771	9.757e-17	3.27949e-15	CFAP44	55779	3.43888e-15	4	1	1	73	128	121
604	ENSG00000116133	3368.15	-1.25015	0.150482	-8.30767	9.76011e-17	3.27949e-15	DHCR24	1718	3.43888e-15	4956	4452	4820	2165	2157	1659
605	ENSG00000124562	900.133	-1.15329	0.139033	-8.29505	1.08538e-16	3.64095e-15	SNRPC	6631	3.81791e-15	1166	1280	1280	594	537	543
606	ENSG00000079462	438.006	-2.10607	0.25402	-8.29095	1.12344e-16	3.76241e-15	PAFAH1B3	5050	3.94528e-15	729	731	673	251	118	125
607	ENSG00000228474	767.951	-1.49191	0.180076	-8.28487	1.18238e-16	3.95328e-15	OST4	100128731	4.14542e-15	1097	1139	1163	503	379	325
608	ENSG00000070010	742.292	-1.3866	0.1675	-8.27822	1.2503e-16	4.17349e-15	UFD1L	7353	4.37633e-15	1000	1095	1127	473	421	337
609	ENSG00000103202	1113.36	-1.65309	0.1997	-8.27786	1.25414e-16	4.17942e-15	NME4	4833	4.38255e-15	1589	1837	1643	719	432	460
610	ENSG00000125753	1554.14	-1.69995	0.205484	-8.27292	1.30714e-16	4.34893e-15	VASP	7408	4.56029e-15	2211	2456	2465	932	762	499
611	ENSG00000087365	2834.06	-0.987189	0.119416	-8.2668	1.37604e-16	4.57066e-15	SF3B2	10992	4.7928e-15	3732	3740	3830	1941	1849	1912
612	ENSG00000105402	523.822	-1.46678	0.177437	-8.2665	1.37952e-16	4.57474e-15	NAPA	8775	4.79708e-15	856	675	778	313	289	233
613	ENSG00000013364	2558.26	-1.42148	0.171996	-8.2646	1.40165e-16	4.64054e-15	MVP	9961	4.86608e-15	4116	3263	3798	1665	1364	1143
614	ENSG00000130640	946.311	-1.41602	0.171343	-8.26424	1.40592e-16	4.64708e-15	TUBGCP2	10844	4.87294e-15	1460	1386	1285	632	471	444
615	ENSG00000123143	825.144	-1.79836	0.217702	-8.26065	1.44875e-16	4.78089e-15	PKN1	5585	5.01325e-15	1284	1330	1232	491	369	245
616	ENSG00000139637	392.368	-1.60037	0.193761	-8.25954	1.4623e-16	4.81542e-15	C12orf10	60314	5.04946e-15	551	579	641	244	177	162
617	ENSG00000105372	16668.5	-1.56244	0.189171	-8.25941	1.46396e-16	4.81542e-15	RPS19	6223	5.04946e-15	22816	25216	26683	11049	7644	6603
618	ENSG00000106244	1581.66	-1.32667	0.160681	-8.25654	1.49953e-16	4.9213e-15	PDAP1	11333	5.16048e-15	2244	2221	2321	1093	790	822
619	ENSG00000146414	108.631	2.38448	0.288803	8.25643	1.501e-16	4.9213e-15	SHPRH	257218	5.16048e-15	38	39	27	151	163	234
620	ENSG00000068394	363.895	-1.35562	0.164239	-8.25393	1.53269e-16	5.01709e-15	GPKOW	27238	5.26093e-15	545	525	500	216	214	184
621	ENSG00000004059	521.447	-1.54462	0.18723	-8.24988	1.58548e-16	5.18155e-15	ARF5	381	5.43338e-15	746	811	774	337	221	240
622	ENSG00000204356	697.292	-1.45159	0.175985	-8.24837	1.60564e-16	5.23899e-15	NELFE	100302242	5.49362e-15	961	1032	1072	457	353	310
623	ENSG00000183258	1059.79	-1.21859	0.147828	-8.24331	1.67505e-16	5.45668e-15	DDX41	51428	5.72189e-15	1476	1484	1488	731	597	582
624	ENSG00000231500	9027.94	-1.32722	0.161045	-8.24126	1.70404e-16	5.54224e-15	RPS18	6222	5.8116e-15	11171	12640	14921	5222	5778	4436
625	ENSG00000101161	1260.01	-1.28	0.155324	-8.24082	1.71038e-16	5.55395e-15	PRPF6	24148	5.82389e-15	1875	1691	1789	850	631	724
626	ENSG00000235043	149.33	-2.13998	0.259816	-8.23652	1.7729e-16	5.74777e-15	TECRP1	NA	6.02712e-15	258	233	239	78	39	49
627	ENSG00000147383	796.151	-1.13641	0.138026	-8.2333	1.8212e-16	5.89492e-15	NSDHL	50814	6.18143e-15	1119	1095	1069	513	514	466
628	ENSG00000177830	665.643	-1.401	0.170187	-8.23211	1.8395e-16	5.94469e-15	CHID1	66005	6.23361e-15	1011	902	984	438	312	347
629	ENSG00000167378	277.211	1.49167	0.181347	8.22549	1.944e-16	6.27241e-15	IRGQ	126298	6.57726e-15	148	163	124	409	408	410
630	ENSG00000160180	54.1688	-4.0658	0.49438	-8.22404	1.96762e-16	6.33182e-15	TFF3	7033	6.63957e-15	102	61	145	6	11	2
631	ENSG00000161981	533.054	-1.48712	0.180828	-8.22398	1.96865e-16	6.33182e-15	SNRNP25	79622	6.63957e-15	791	862	704	331	230	279
632	ENSG00000204149	65.664	3.26353	0.396842	8.22375	1.97237e-16	6.33373e-15	AGAP6	414189	6.64156e-15	7	17	13	127	82	147
633	ENSG00000135624	4456.82	-1.13952	0.138576	-8.2231	1.98305e-16	6.35796e-15	CCT7	10574	6.66698e-15	6190	6497	5706	3090	2753	2505
634	ENSG00000130165	399.305	-1.57284	0.191359	-8.21929	2.04715e-16	6.55314e-15	ELOF1	84337	6.87163e-15	580	621	593	251	191	161
635	ENSG00000226950	620.242	-1.28354	0.156179	-8.21841	2.06211e-16	6.59064e-15	DANCR	57291	6.91096e-15	938	888	812	405	341	337
636	ENSG00000132274	64.3307	4.93993	0.601107	8.21805	2.06843e-16	6.60045e-15	TRIM22	10346	6.92124e-15	7	2	2	57	202	115
637	ENSG00000125814	86.2442	2.37416	0.288914	8.21755	2.07703e-16	6.61748e-15	NAPB	63908	6.9391e-15	29	33	21	140	132	162
638	ENSG00000277791	1312.87	-1.42074	0.172994	-8.21264	2.1638e-16	6.88314e-15	PSMB3	5691	7.21767e-15	1733	1910	2092	878	624	640
639	ENSG00000213639	853.378	1.15718	0.140988	8.20765	2.25565e-16	7.16407e-15	PPP1CB	5500	7.51226e-15	553	542	490	1233	1122	1180
640	ENSG00000253626	313.904	-1.85831	0.22662	-8.20011	2.40161e-16	7.61573e-15	EIF5AL1	143244	7.98587e-15	371	604	501	166	122	119
641	ENSG00000141552	631.535	-1.9235	0.234626	-8.19815	2.44118e-16	7.72913e-15	ANAPC11	51529	8.10479e-15	933	1098	969	383	209	198
642	ENSG00000135048	1906.58	1.48014	0.180555	8.19774	2.44954e-16	7.74351e-15	TMEM2	23670	8.11986e-15	1085	1162	771	2439	3035	2947
643	ENSG00000025770	434.95	-1.7917	0.218625	-8.19531	2.49957e-16	7.88938e-15	NCAPH2	29781	8.27282e-15	673	754	599	265	162	157
644	ENSG00000145425	4915.7	-1.23116	0.150259	-8.19359	2.53548e-16	7.99031e-15	RPS3A	6189	8.37866e-15	6035	6894	7755	2991	3201	2617
645	ENSG00000249936	718.074	-1.15401	0.140856	-8.19281	2.55206e-16	8.03009e-15	RAC1P2	NA	8.42037e-15	935	1009	1029	448	461	427
646	ENSG00000171163	133.505	2.03531	0.248457	8.19183	2.57294e-16	8.08327e-15	ZNF692	55657	8.47613e-15	48	46	64	237	179	227
647	ENSG00000154358	115.323	2.45128	0.299312	8.18971	2.61853e-16	8.21377e-15	OBSCN	84033	8.61297e-15	37	45	25	216	139	230
648	ENSG00000142541	21030.8	-1.29945	0.158676	-8.1893	2.62744e-16	8.22898e-15	RPL13A	23521	8.62893e-15	29184	29737	30809	14496	12053	9906
649	ENSG00000140564	978.156	-1.40344	0.171384	-8.18885	2.63743e-16	8.24757e-15	FURIN	5045	8.64842e-15	1397	1319	1543	644	445	520
650	ENSG00000145741	5787.91	-1.08076	0.131984	-8.1886	2.6429e-16	8.25195e-15	BTF3	689	8.65302e-15	7370	7524	8686	3735	3892	3520
651	ENSG00000109670	118.519	2.18585	0.267009	8.18642	2.69107e-16	8.38943e-15	FBXW7	55294	8.79718e-15	47	48	33	158	229	197
652	ENSG00000102103	477.649	-1.5352	0.187613	-8.1828	2.77324e-16	8.63236e-15	PQBP1	10084	9.05191e-15	703	662	766	307	215	212
653	ENSG00000125971	863.623	-1.40823	0.172149	-8.18028	2.83176e-16	8.80101e-15	DYNLRB1	83658	9.22876e-15	1179	1102	1483	539	437	442
654	ENSG00000063245	1866.47	-1.7825	0.217941	-8.17882	2.86646e-16	8.89523e-15	EPN1	29924	9.32756e-15	3055	3038	2584	1185	697	639
655	ENSG00000188677	434.353	-1.26429	0.154608	-8.17735	2.90149e-16	8.99018e-15	PARVB	29780	9.42712e-15	626	630	584	262	266	238
656	ENSG00000179262	697.385	-1.63183	0.199589	-8.17597	2.93491e-16	9.07989e-15	RAD23A	5886	9.52119e-15	1057	1037	1070	454	294	272
657	ENSG00000124198	729.586	1.3975	0.171004	8.17234	3.02474e-16	9.33185e-15	ARFGEF2	10564	9.7854e-15	444	405	354	901	1069	1203
658	ENSG00000071082	4262.5	-1.20704	0.147699	-8.1723	3.02555e-16	9.33185e-15	RPL31	6160	9.7854e-15	5336	5609	6901	2679	2662	2388
659	ENSG00000101057	1402.1	-1.9237	0.235619	-8.16448	3.22831e-16	9.94211e-15	MYBL2	4605	1.04253e-14	2401	2666	1591	796	490	469
660	ENSG00000149823	499.613	-1.74508	0.213758	-8.16382	3.246e-16	9.98146e-15	VPS51	738	1.04666e-14	835	814	660	304	210	175
661	ENSG00000198707	231.908	1.98595	0.243287	8.16298	3.26861e-16	1.00358e-14	CEP290	80184	1.05235e-14	70	115	96	289	373	449
662	ENSG00000171617	489.218	1.60075	0.196138	8.16136	3.3128e-16	1.01561e-14	ENC1	8507	1.06497e-14	251	284	192	635	712	861
663	ENSG00000144935	85.087	2.58932	0.317283	8.16092	3.32471e-16	1.01772e-14	TRPC1	7220	1.06719e-14	24	25	24	107	150	181
664	ENSG00000244313	751.864	-1.4054	0.172261	-8.15858	3.38997e-16	1.03614e-14	RP11-425L10.1	NA	1.0865e-14	1051	1128	1097	453	461	323
665	ENSG00000143774	599.476	-1.49194	0.182961	-8.15441	3.50894e-16	1.07089e-14	GUK1	2987	1.12293e-14	860	915	880	397	273	273
666	ENSG00000145632	1349.35	1.92777	0.236664	8.14562	3.77346e-16	1.14988e-14	PLK2	10769	1.20577e-14	450	680	555	1856	2991	1564
667	ENSG00000271425	60.6329	3.00541	0.368989	8.14497	3.7936e-16	1.15429e-14	NBPF10	100132406	1.21039e-14	11	19	9	94	125	104
668	ENSG00000175826	732.769	-1.49304	0.183339	-8.14358	3.83749e-16	1.1659e-14	CTDNEP1	23399	1.22256e-14	1115	1166	964	476	358	318
669	ENSG00000151012	1651.11	1.50873	0.185278	8.14308	3.85351e-16	1.16901e-14	SLC7A11	23657	1.22583e-14	785	808	983	1948	2366	3016
670	ENSG00000277972	408.389	-1.72254	0.211755	-8.1346	4.13312e-16	1.25197e-14	CISD3	284106	1.31281e-14	642	678	561	253	155	161
671	ENSG00000117984	1800.76	-1.42027	0.174601	-8.13439	4.14016e-16	1.25223e-14	CTSD	1509	1.31309e-14	2950	2362	2553	1175	795	969
672	ENSG00000101751	122.296	2.4029	0.295463	8.13267	4.19924e-16	1.26821e-14	POLI	11201	1.32985e-14	37	31	49	164	176	277
673	ENSG00000149929	197.537	-1.70297	0.209448	-8.13073	4.26696e-16	1.28675e-14	HIRIP3	8479	1.34928e-14	283	330	294	113	86	80
674	ENSG00000123136	856.762	-1.63066	0.200597	-8.12907	4.3261e-16	1.30264e-14	DDX39A	10212	1.36595e-14	1287	1351	1248	555	317	382
675	ENSG00000237289	628.05	-1.59542	0.196279	-8.12834	4.35202e-16	1.30851e-14	CKMT1B	1159	1.3721e-14	941	788	1102	296	258	383
676	ENSG00000125968	2611.94	-1.791	0.220485	-8.12301	4.54758e-16	1.36528e-14	ID1	3397	1.43164e-14	3845	3966	4347	1579	762	1172
677	ENSG00000235655	436.758	-1.37497	0.1693	-8.12152	4.60371e-16	1.38009e-14	H3F3AP4	NA	1.44717e-14	617	677	597	281	223	224
678	ENSG00000226608	888.532	-1.45167	0.178808	-8.11863	4.71494e-16	1.41135e-14	FTLP3	NA	1.47995e-14	1371	1242	1291	594	444	389
679	ENSG00000174917	281.644	-1.75903	0.216683	-8.11797	4.74031e-16	1.41686e-14	C19orf70	125988	1.48572e-14	419	454	432	171	101	112
680	ENSG00000158615	1169.23	1.22575	0.151009	8.11709	4.77484e-16	1.42508e-14	PPP1R15B	84919	1.49434e-14	660	710	731	1488	1551	1875
681	ENSG00000133056	364.236	1.45757	0.179585	8.11633	4.8049e-16	1.43194e-14	PIK3C2B	5287	1.50154e-14	193	211	179	517	474	611
682	ENSG00000126756	580.54	-1.26469	0.155864	-8.11404	4.89628e-16	1.45704e-14	UXT	8409	1.52785e-14	861	734	864	323	331	370
683	ENSG00000163931	20795.1	-1.50553	0.185555	-8.11363	4.91295e-16	1.45856e-14	TKT	7086	1.52945e-14	30754	28997	32522	14054	10047	8397
684	ENSG00000101076	592.069	-1.27048	0.156587	-8.11356	4.91576e-16	1.45856e-14	HNF4A	3172	1.52945e-14	796	907	810	385	339	316
685	ENSG00000159199	1812.12	-1.30369	0.160726	-8.11128	5.00911e-16	1.48409e-14	ATP5G1	516	1.55622e-14	2750	2501	2487	1261	927	947
686	ENSG00000117691	573.58	-1.2939	0.159588	-8.10777	5.15562e-16	1.52527e-14	NENF	29937	1.5994e-14	754	793	897	370	315	312
687	ENSG00000240087	975.328	-1.57847	0.194786	-8.10361	5.3352e-16	1.57479e-14	RPSAP12	NA	1.65133e-14	1477	1526	1381	642	445	381
688	ENSG00000198171	1003.97	-1.43626	0.177243	-8.10337	5.34563e-16	1.57479e-14	DDRGK1	65992	1.65133e-14	1507	1348	1543	678	476	472
689	ENSG00000234420	79.3704	2.44717	0.301995	8.10336	5.3463e-16	1.57479e-14	ZNF37BP	100129482	1.65133e-14	25	25	24	122	120	161
690	ENSG00000196756	542.832	-1.46339	0.180747	-8.09638	5.66198e-16	1.66536e-14	SNHG17	NA	1.7463e-14	692	893	806	341	276	249
691	ENSG00000099795	410.537	-2.0424	0.252403	-8.09181	5.8783e-16	1.72648e-14	NDUFB7	4713	1.8104e-14	660	714	609	241	112	128
692	ENSG00000011405	686.089	1.54537	0.191086	8.0873	6.10015e-16	1.78905e-14	PIK3C2A	5286	1.87601e-14	380	360	311	783	1086	1197
693	ENSG00000237506	329.299	-1.46533	0.18121	-8.08634	6.14869e-16	1.80069e-14	RPSAP15	NA	1.8882e-14	476	523	452	180	198	147
694	ENSG00000185608	469.723	-1.3726	0.16975	-8.08602	6.16454e-16	1.80273e-14	MRPL40	64976	1.89035e-14	631	668	735	275	289	222
695	ENSG00000148175	1638.89	1.33771	0.16548	8.08382	6.27687e-16	1.83294e-14	STOM	2040	1.92202e-14	858	862	1068	1963	2544	2538
696	ENSG00000141867	725.132	-1.27919	0.15827	-8.08234	6.35356e-16	1.85266e-14	BRD4	23476	1.94271e-14	1009	1079	993	491	376	403
697	ENSG00000162878	936.317	1.4976	0.185313	8.08142	6.40185e-16	1.86407e-14	PKDCC	91461	1.95467e-14	470	458	542	1525	1053	1570
698	ENSG00000119383	1324.07	-1.47434	0.182458	-8.08045	6.45305e-16	1.87628e-14	PTPA	5524	1.96748e-14	2111	2023	1708	880	590	632
699	ENSG00000100138	965.212	-1.4749	0.182577	-8.07823	6.57161e-16	1.90802e-14	SNU13	4809	2.00076e-14	1351	1455	1455	605	545	382
700	ENSG00000116288	2036.05	-1.16515	0.144312	-8.07378	6.81544e-16	1.97599e-14	PARK7	11315	2.07203e-14	2736	2539	3173	1323	1167	1278
701	ENSG00000198919	260.714	1.68515	0.208787	8.07117	6.96279e-16	2.01583e-14	DZIP3	9666	2.11381e-14	119	110	142	321	424	448
702	ENSG00000168653	1778.83	-1.20256	0.149038	-8.06881	7.09851e-16	2.0522e-14	NDUFS5	4725	2.15194e-14	2303	2269	2869	1024	1069	1140
703	ENSG00000105373	2031.63	-1.56294	0.193721	-8.06799	7.14635e-16	2.06309e-14	GLTSCR2	29997	2.16336e-14	2689	2875	3545	1298	984	800
704	ENSG00000167925	297.234	-1.63081	0.202147	-8.06745	7.1783e-16	2.06937e-14	GHDC	84514	2.16994e-14	464	424	461	180	112	143
705	ENSG00000111696	141.85	2.12934	0.263982	8.06625	7.24915e-16	2.08683e-14	NT5DC3	51559	2.18826e-14	39	76	43	228	221	243
706	ENSG00000198951	288.608	-1.34703	0.167026	-8.06477	7.33738e-16	2.10924e-14	NAGA	4668	2.21175e-14	411	430	402	166	163	159
707	ENSG00000155366	1076.87	-1.24331	0.154209	-8.06246	7.47742e-16	2.14645e-14	RHOC	389	2.25078e-14	1539	1526	1477	722	658	538
708	ENSG00000005022	6386.08	-1.01716	0.126219	-8.05874	7.70879e-16	2.20974e-14	SLC25A5	292	2.31714e-14	8920	8445	8280	4585	4069	4017
709	ENSG00000116138	216.73	1.54835	0.192173	8.05707	7.81456e-16	2.2369e-14	DNAJC16	23341	2.34562e-14	109	104	119	293	341	336
710	ENSG00000185627	1362.23	-1.09946	0.136467	-8.05663	7.84275e-16	2.24181e-14	PSMD13	5719	2.35077e-14	1808	1949	1816	929	880	792
711	ENSG00000127589	335.22	-1.65671	0.205706	-8.05377	8.02819e-16	2.29159e-14	TUBBP1	NA	2.40297e-14	556	586	385	178	146	161
712	ENSG00000126804	293.913	1.70619	0.211913	8.05138	8.18658e-16	2.33352e-14	ZBTB1	22890	2.44693e-14	167	105	141	400	432	518
713	ENSG00000070367	724.038	1.41471	0.175766	8.04883	8.35903e-16	2.37933e-14	EXOC5	10640	2.49497e-14	429	409	346	888	1041	1231
714	ENSG00000100297	1204.9	-2.12797	0.264453	-8.04669	8.50636e-16	2.41788e-14	MCM5	4174	2.5354e-14	1986	2390	1508	679	358	308
715	ENSG00000134109	468.295	1.53041	0.190209	8.04594	8.55868e-16	2.42935e-14	EDEM1	9695	2.54742e-14	226	289	207	584	765	738
716	ENSG00000170523	329.534	-1.7007	0.211387	-8.04544	8.59354e-16	2.43584e-14	KRT83	3889	2.55422e-14	509	549	454	204	130	131
717	ENSG00000223745	58.8556	3.15348	0.391988	8.04484	8.63615e-16	2.4445e-14	CCDC18-AS1	NA	2.56331e-14	12	17	6	84	118	116
718	ENSG00000167770	1130.88	-1.2718	0.158118	-8.04336	8.74061e-16	2.47062e-14	OTUB1	55611	2.5907e-14	1573	1661	1565	778	566	643
719	ENSG00000125835	2303.89	-1.59895	0.198808	-8.04271	8.78716e-16	2.48033e-14	SNRPB	6628	2.60088e-14	3226	3995	3172	1515	957	959
720	ENSG00000203668	667.494	1.3233	0.164546	8.04215	8.82737e-16	2.48821e-14	CHML	1122	2.60915e-14	371	428	344	856	935	1070
721	ENSG00000137312	1244.45	-1.09366	0.136064	-8.0378	9.14687e-16	2.5747e-14	FLOT1	10211	2.69984e-14	1574	1708	1803	831	754	796
722	ENSG00000054148	874.696	-1.58256	0.196907	-8.03711	9.19802e-16	2.58551e-14	PHPT1	29085	2.71117e-14	1272	1246	1418	580	364	369
723	ENSG00000233461	151.312	-1.86175	0.231662	-8.03653	9.24206e-16	2.5943e-14	RP11-295G20.2	NA	2.72039e-14	251	191	270	69	57	70
724	ENSG00000126768	478.768	-1.54773	0.192602	-8.0359	9.28908e-16	2.60389e-14	TIMM17B	10245	2.73045e-14	668	692	781	309	217	205
725	ENSG00000156671	315.103	1.65992	0.206639	8.03295	9.5156e-16	2.66371e-14	SAMD8	142891	2.79318e-14	178	146	129	385	514	537
726	ENSG00000157020	2065.89	-1.23341	0.153552	-8.0325	9.55076e-16	2.66987e-14	SEC13	6396	2.79963e-14	3139	2990	2568	1412	1164	1123
727	ENSG00000196642	817.736	-1.58619	0.197659	-8.02489	1.01618e-15	2.83678e-14	RABL6	55684	2.97465e-14	1278	1295	1108	538	331	357
728	ENSG00000133265	805.3	-1.93206	0.24082	-8.02284	1.03331e-15	2.88065e-14	HSPBP1	23640	3.02065e-14	1334	1432	1063	487	248	268
729	ENSG00000125841	694.072	-1.15859	0.144427	-8.02193	1.04096e-15	2.89799e-14	NRSN2	80023	3.03884e-14	956	941	979	468	401	419
730	ENSG00000115457	422.448	-1.52485	0.190129	-8.02006	1.05695e-15	2.93847e-14	IGFBP2	3485	3.08128e-14	649	609	624	275	180	199
731	ENSG00000180917	225.12	1.61412	0.201327	8.01741	1.08002e-15	2.99849e-14	CMTR2	55783	3.14422e-14	120	99	113	296	337	385
732	ENSG00000169738	395.396	-1.86741	0.233078	-8.01195	1.12907e-15	3.13039e-14	DCXR	51181	3.28253e-14	671	648	543	240	141	129
733	ENSG00000156482	2123.59	-1.4258	0.178042	-8.00822	1.16383e-15	3.22236e-14	RPL30	6156	3.37897e-14	2985	3062	3239	1460	1069	927
734	ENSG00000214253	489.961	-1.62181	0.202538	-8.00744	1.17119e-15	3.23832e-14	FIS1	51024	3.39571e-14	762	680	776	317	199	205
735	ENSG00000137145	505.785	1.64246	0.20519	8.00456	1.19892e-15	3.3105e-14	DENND4C	55667	3.4714e-14	296	216	224	592	820	887
736	ENSG00000118495	148.331	2.06406	0.257895	8.00347	1.20958e-15	3.33538e-14	PLAGL1	5325	3.49748e-14	75	53	44	200	236	282
737	ENSG00000130669	1311.04	-1.71918	0.214865	-8.0012	1.2321e-15	3.39286e-14	PAK4	10298	3.55776e-14	2061	2210	1763	847	499	485
738	ENSG00000244398	1556.43	-1.30663	0.163316	-8.00061	1.23801e-15	3.40452e-14	RP11-466H18.1	NA	3.56999e-14	1982	2130	2538	989	939	760
739	ENSG00000116649	982.52	-1.66198	0.20777	-7.99912	1.25311e-15	3.44138e-14	SRM	6723	3.60864e-14	1571	1659	1251	620	432	362
740	ENSG00000176153	9944.4	-1.23251	0.154136	-7.99624	1.28279e-15	3.51813e-14	GPX2	2877	3.68912e-14	14125	11759	15970	5616	6547	5649
741	ENSG00000168883	944.867	-1.04398	0.130608	-7.99324	1.31434e-15	3.59981e-14	USP39	10713	3.77477e-14	1277	1292	1248	619	617	616
742	ENSG00000095015	166.627	2.0147	0.252222	7.9878	1.37364e-15	3.75714e-14	MAP3K1	4214	3.93974e-14	84	66	47	224	316	262
743	ENSG00000115221	71.8667	2.71585	0.34009	7.98568	1.39755e-15	3.81739e-14	ITGB6	100505984	4.00292e-14	19	25	13	100	124	150
744	ENSG00000114331	188.174	1.62506	0.203505	7.98532	1.40156e-15	3.82321e-14	ACAP2	23527	4.00903e-14	99	100	77	271	293	289
745	ENSG00000136280	389.159	-1.42315	0.178298	-7.9819	1.44097e-15	3.92521e-14	CCM2	83605	4.11599e-14	552	636	513	243	199	191
746	ENSG00000162910	326.485	-1.79391	0.224752	-7.98174	1.44282e-15	3.92521e-14	MRPL55	128308	4.11599e-14	462	566	493	199	123	116
747	ENSG00000137699	696.812	-1.40914	0.176642	-7.97738	1.49474e-15	4.061e-14	TRIM29	23650	4.25837e-14	1247	896	894	397	365	382
748	ENSG00000110455	137.189	1.88482	0.236379	7.97372	1.53974e-15	4.17768e-14	ACCS	84680	4.38072e-14	62	53	60	187	211	250
749	ENSG00000124733	412.003	-1.30815	0.164069	-7.97317	1.54656e-15	4.19057e-14	MEA1	4201	4.39424e-14	630	546	586	261	219	231
750	ENSG00000163629	267.062	1.70963	0.214445	7.97238	1.55645e-15	4.20956e-14	PTPN13	5783	4.41416e-14	110	126	140	317	440	470
751	ENSG00000163344	377.139	-1.62004	0.203209	-7.97228	1.55771e-15	4.20956e-14	PMVK	10654	4.41416e-14	569	578	561	243	153	159
752	ENSG00000107186	243.494	1.71854	0.215611	7.97057	1.57946e-15	4.26266e-14	MPDZ	8777	4.46984e-14	104	134	103	299	394	428
753	ENSG00000173486	518.137	-1.6512	0.207207	-7.96882	1.60195e-15	4.31761e-14	FKBP2	2286	4.52745e-14	818	738	803	333	190	228
754	ENSG00000131711	2703.86	1.53987	0.19328	7.96705	1.62512e-15	4.37424e-14	MAP1B	4131	4.58684e-14	1273	1753	1126	3298	4566	4208
755	ENSG00000095321	552.384	-1.4397	0.180713	-7.9668	1.62835e-15	4.37714e-14	CRAT	1384	4.58988e-14	904	719	799	353	251	289
756	ENSG00000167600	1368.83	-1.79679	0.225625	-7.96362	1.6708e-15	4.4853e-14	CYP2S1	29785	4.7033e-14	2026	2095	2257	748	715	372
757	ENSG00000169976	775.542	-1.66097	0.208592	-7.96277	1.68231e-15	4.51024e-14	SF3B5	83443	4.72945e-14	1169	1219	1148	512	300	305
758	ENSG00000049541	550.16	-1.48714	0.186798	-7.96124	1.70325e-15	4.56034e-14	RFC2	5982	4.78198e-14	803	916	715	350	240	278
759	ENSG00000233328	217.519	-1.64082	0.206108	-7.96097	1.70696e-15	4.5605e-14	PFN1P1	NA	4.78215e-14	307	373	308	126	99	92
760	ENSG00000133027	244.224	-1.96559	0.246906	-7.96091	1.7078e-15	4.5605e-14	PEMT	10400	4.78215e-14	379	396	392	144	71	83
761	ENSG00000110013	322.107	1.55758	0.195664	7.96046	1.71395e-15	4.57092e-14	SIAE	54414	4.79307e-14	173	155	161	389	492	562
762	ENSG00000099956	676.259	-1.48081	0.186114	-7.9565	1.7698e-15	4.71366e-14	SMARCB1	6598	4.94276e-14	912	1073	1003	427	370	273
763	ENSG00000167775	493.454	-1.76843	0.222387	-7.95205	1.83453e-15	4.87965e-14	CD320	51293	5.11682e-14	770	836	684	311	179	181
764	ENSG00000102030	386.896	-1.26701	0.159339	-7.95166	1.84035e-15	4.88872e-14	NAA10	8260	5.12632e-14	544	554	543	247	225	210
765	ENSG00000147684	1305.88	-1.11506	0.140285	-7.94857	1.88681e-15	5.00558e-14	NDUFB9	4715	5.24887e-14	1764	1624	1973	835	794	846
766	ENSG00000144591	467.759	-1.25767	0.158303	-7.94473	1.94608e-15	5.14942e-14	GMPPA	29926	5.39969e-14	700	655	624	300	276	251
767	ENSG00000174903	701.062	-1.37738	0.173371	-7.94468	1.94686e-15	5.14942e-14	RAB1B	81876	5.39969e-14	1148	1037	852	445	363	361
768	ENSG00000008988	7489.07	-1.11192	0.139962	-7.94443	1.95087e-15	5.14942e-14	RPS20	6224	5.39969e-14	9821	9440	11460	4662	5160	4391
769	ENSG00000185187	219.192	-1.9379	0.243932	-7.94441	1.95117e-15	5.14942e-14	SIGIRR	59307	5.39969e-14	318	416	309	123	78	71
770	ENSG00000113594	319.553	1.7075	0.214987	7.94233	1.98416e-15	5.22967e-14	LIFR	3977	5.48384e-14	167	162	120	385	508	576
771	ENSG00000104805	1620.66	-1.19468	0.150445	-7.94095	2.00634e-15	5.27245e-14	NUCB1	4924	5.52871e-14	2424	2046	2297	1110	874	972
772	ENSG00000175467	848.018	-1.65424	0.208319	-7.94089	2.00731e-15	5.27245e-14	SART1	9092	5.52871e-14	1216	1230	1417	553	314	359
773	ENSG00000119705	777.788	-1.12937	0.142226	-7.9407	2.01044e-15	5.27245e-14	SLIRP	81892	5.52871e-14	1012	1083	1107	526	468	470
774	ENSG00000134352	1535.3	1.26239	0.158977	7.94068	2.01078e-15	5.27245e-14	IL6ST	3572	5.52871e-14	988	879	843	1849	2160	2493
775	ENSG00000239665	87.3373	2.73821	0.34503	7.93618	2.0851e-15	5.46027e-14	RP11-295P9.3	NA	5.72565e-14	21	29	19	108	137	211
776	ENSG00000185721	846.387	-1.12962	0.142345	-7.93573	2.09254e-15	5.4727e-14	DRG1	4733	5.73869e-14	1171	1175	1139	491	584	518
777	ENSG00000099817	1125.79	-1.85163	0.233343	-7.93522	2.10126e-15	5.48844e-14	POLR2E	5434	5.75519e-14	1775	2009	1506	705	378	382
778	ENSG00000113240	134.368	2.04035	0.257169	7.9339	2.12369e-15	5.53988e-14	CLK4	57396	5.80913e-14	63	57	37	197	200	252
779	ENSG00000108829	4024.04	-1.08892	0.137287	-7.93171	2.16147e-15	5.63119e-14	LRRC59	55379	5.90488e-14	5973	5308	5143	2590	2790	2341
780	ENSG00000198089	145.263	2.07887	0.262157	7.92988	2.19365e-15	5.70771e-14	SFI1	9814	5.98512e-14	41	58	68	235	186	283
781	ENSG00000125656	442.171	-1.88389	0.237696	-7.92563	2.2699e-15	5.89855e-14	CLPP	8192	6.18524e-14	694	775	619	271	144	150
782	ENSG00000257621	222.12	1.56791	0.197906	7.92252	2.32747e-15	6.04042e-14	PSMA3-AS1	379025	6.33399e-14	104	120	113	304	312	380
783	ENSG00000107833	446.247	-1.79323	0.226393	-7.92089	2.35823e-15	6.11242e-14	NPM3	10360	6.4095e-14	646	765	667	275	181	143
784	ENSG00000167900	1022.97	-1.98039	0.250049	-7.91999	2.37521e-15	6.14857e-14	TK1	7083	6.44741e-14	1602	2069	1227	590	336	314
785	ENSG00000178952	3465.01	-1.22239	0.154404	-7.91682	2.43666e-15	6.29962e-14	TUFM	100616256	6.6058e-14	5051	4946	4557	2464	1977	1796
786	ENSG00000169223	2530.92	-1.40343	0.177432	-7.90971	2.5799e-15	6.66147e-14	LMAN2	10960	6.98523e-14	3930	3599	3491	1770	1207	1188
787	ENSG00000235174	5305.84	-1.30121	0.164541	-7.90814	2.61271e-15	6.7376e-14	RPL39P3	NA	7.06506e-14	6602	6886	9159	2896	3407	2886
788	ENSG00000173207	754.594	-1.37134	0.173419	-7.90768	2.62237e-15	6.75393e-14	CKS1B	1163	7.08219e-14	1051	1223	992	502	368	392
789	ENSG00000110841	500.059	1.39306	0.176214	7.90553	2.66804e-15	6.86285e-14	PPFIBP1	8496	7.1964e-14	272	258	298	597	792	784
790	ENSG00000125633	224.062	1.4581	0.184451	7.90504	2.67856e-15	6.88118e-14	CCDC93	54520	7.21562e-14	120	123	115	309	336	340
791	ENSG00000130449	230.377	1.56856	0.198475	7.90309	2.72071e-15	6.98063e-14	ZSWIM6	57688	7.31991e-14	132	111	106	312	334	388
792	ENSG00000223959	152.725	1.86859	0.23649	7.90135	2.75908e-15	7.07013e-14	AFG3L1P	172	7.41376e-14	61	76	59	223	210	287
793	ENSG00000089327	443.71	-1.41876	0.179642	-7.89773	2.84027e-15	7.26073e-14	FXYD5	53827	7.61362e-14	603	633	703	286	236	202
794	ENSG00000232187	176.422	-2.29375	0.290432	-7.89772	2.84061e-15	7.26073e-14	FTH1P7	NA	7.61362e-14	294	330	256	89	34	56
795	ENSG00000108848	1169.1	1.25689	0.159258	7.89217	2.9697e-15	7.58115e-14	LUC7L3	51747	7.94961e-14	679	602	788	1470	1692	1784
796	ENSG00000166228	1323.86	-1.13639	0.144001	-7.89157	2.98409e-15	7.60831e-14	PCBD1	5092	7.97809e-14	1712	1947	1802	925	771	787
797	ENSG00000172974	1552.87	-1.09269	0.138475	-7.89091	2.99995e-15	7.63915e-14	AC007318.5	NA	8.01043e-14	2104	1915	2325	954	1019	1001
798	ENSG00000067225	36927.4	-1.09323	0.138556	-7.8902	3.01702e-15	7.67298e-14	PKM	5315	8.04591e-14	55051	50858	44948	25592	21672	23445
799	ENSG00000174718	310.635	1.61744	0.205014	7.88943	3.0357e-15	7.71083e-14	KIAA1551	55196	8.0856e-14	160	138	160	364	543	499
800	ENSG00000075826	48.6371	5.39783	0.684305	7.88805	3.06936e-15	7.78658e-14	SEC31B	25956	8.16503e-14	0	3	4	70	80	134
801	ENSG00000105197	1597.28	-1.37443	0.174261	-7.8872	3.09053e-15	7.83051e-14	TIMM50	92609	8.21109e-14	2196	2595	2126	1094	779	793
802	ENSG00000142546	454.102	-1.72969	0.219333	-7.88616	3.11636e-15	7.88609e-14	NOSIP	51070	8.26938e-14	659	717	718	292	171	167
803	ENSG00000168137	859.657	1.37623	0.17467	7.87902	3.29947e-15	8.33907e-14	SETD5	55209	8.74436e-14	463	540	432	1076	1169	1478
804	ENSG00000196230	11206.7	-1.37718	0.174799	-7.87868	3.30866e-15	8.35191e-14	TUBB	203068	8.75783e-14	17490	18740	12319	6850	5766	6074
805	ENSG00000004142	2093.37	-1.04262	0.132351	-7.87774	3.33353e-15	8.40421e-14	POLDIP2	26073	8.81268e-14	2949	2909	2597	1452	1304	1349
806	ENSG00000198546	137.724	-1.7493	0.222093	-7.87643	3.36861e-15	8.48212e-14	ZNF511	118472	8.89437e-14	199	235	203	70	57	62
807	ENSG00000151233	247.407	1.5162	0.192532	7.87505	3.40613e-15	8.56598e-14	GXYLT1	283464	8.98231e-14	152	118	114	352	380	369
808	ENSG00000165494	361.149	1.35131	0.171669	7.87159	3.50169e-15	8.7954e-14	PCF11	51585	9.22288e-14	219	195	196	463	529	564
809	ENSG00000144426	204.455	2.22444	0.282684	7.869	3.57482e-15	8.96797e-14	NBEAL1	65065	9.40384e-14	76	84	56	208	379	423
810	ENSG00000064607	486.442	1.38133	0.175617	7.86556	3.6744e-15	9.2064e-14	SUGP2	10147	9.65386e-14	304	280	225	683	646	781
811	ENSG00000142327	692.307	-1.60768	0.204524	-7.86062	3.82242e-15	9.56548e-14	RNPEPL1	NA	1.00304e-13	1095	997	1036	458	305	262
812	ENSG00000188483	284.201	-2.08248	0.264968	-7.85935	3.86132e-15	9.65093e-14	IER5L	389792	1.012e-13	390	489	501	164	79	83
813	ENSG00000055609	523.112	1.46204	0.18611	7.85578	3.9729e-15	9.91758e-14	KMT2C	58508	1.03996e-13	314	299	222	669	776	859
814	ENSG00000108518	7647.45	-1.52633	0.19451	-7.84703	4.25999e-15	1.06212e-13	PFN1	5216	1.11374e-13	10862	12630	10570	5148	3703	2972
815	ENSG00000187778	689.78	-1.32561	0.168963	-7.84556	4.31014e-15	1.0733e-13	MCRS1	10445	1.12547e-13	954	1055	950	472	341	367
816	ENSG00000233966	571.886	-1.98418	0.253146	-7.8381	4.57426e-15	1.13768e-13	UBE2SP1	NA	1.19297e-13	948	1110	682	330	187	175
817	ENSG00000108256	1212.2	1.13921	0.145369	7.83671	4.62512e-15	1.14892e-13	NUFIP2	57532	1.20476e-13	793	781	697	1487	1763	1752
818	ENSG00000165502	2284.86	-1.1204	0.142995	-7.83528	4.67803e-15	1.16064e-13	RPL36AL	6166	1.21705e-13	2863	2962	3566	1444	1507	1368
819	ENSG00000146677	83.1704	-2.37455	0.303272	-7.82979	4.88683e-15	1.21097e-13	AC004453.8	NA	1.26982e-13	148	122	148	38	22	20
820	ENSG00000175221	316.65	-1.82635	0.233477	-7.8224	5.18248e-15	1.28266e-13	MED16	10025	1.345e-13	532	539	411	190	106	121
821	ENSG00000053372	873.077	-1.33558	0.170793	-7.81986	5.2883e-15	1.30726e-13	MRTO4	51154	1.3708e-13	1190	1435	1127	580	467	439
822	ENSG00000101210	426.674	-1.82153	0.233052	-7.81596	5.45446e-15	1.3467e-13	EEF1A2	1917	1.41215e-13	633	588	775	229	214	120
823	ENSG00000166557	1928.06	-0.981124	0.125599	-7.81156	5.64857e-15	1.39292e-13	TMED3	23423	1.46062e-13	2575	2584	2520	1357	1224	1309
824	ENSG00000106665	492.805	-1.6512	0.211438	-7.8094	5.7461e-15	1.41526e-13	CLIP2	7461	1.48404e-13	850	692	702	317	207	189
825	ENSG00000198677	884.582	1.43641	0.184053	7.80434	5.98136e-15	1.47141e-13	TTC37	9652	1.54293e-13	551	444	436	1018	1413	1445
826	ENSG00000110080	1000.4	-1.4382	0.184329	-7.80235	6.0764e-15	1.49298e-13	ST3GAL4	6484	1.56555e-13	1469	1369	1547	659	409	549
827	ENSG00000142453	507.08	-1.73575	0.222471	-7.80216	6.0854e-15	1.49339e-13	CARM1	10498	1.56597e-13	807	883	651	318	192	191
828	ENSG00000165637	3976.1	-0.990066	0.126908	-7.80143	6.12087e-15	1.50028e-13	VDAC2	7417	1.5732e-13	5406	4841	5621	2621	2724	2644
829	ENSG00000106245	510.878	-1.40227	0.179855	-7.79665	6.3572e-15	1.55633e-13	BUD31	8896	1.63197e-13	650	701	872	245	311	285
830	ENSG00000099901	1467.73	-1.42337	0.182593	-7.79534	6.42355e-15	1.57068e-13	RANBP1	5902	1.64701e-13	1974	2459	1982	970	786	635
831	ENSG00000047188	441.892	1.50989	0.193743	7.79327	6.52968e-15	1.5947e-13	YTHDC2	64848	1.67221e-13	253	241	194	530	673	759
832	ENSG00000253341	344.303	-1.4044	0.180218	-7.7928	6.55426e-15	1.59878e-13	RP11-730G20.2	NA	1.67649e-13	454	467	579	208	180	178
833	ENSG00000114127	200.399	1.91508	0.245801	7.79118	6.63876e-15	1.61745e-13	XRN1	54464	1.69606e-13	90	88	73	224	345	382
834	ENSG00000177200	641.589	1.47802	0.189813	7.7867	6.87844e-15	1.67384e-13	CHD9	80205	1.75519e-13	374	293	349	739	1008	1087
835	ENSG00000138759	459.672	1.76038	0.226088	7.78626	6.90207e-15	1.67757e-13	FRAS1	80144	1.75911e-13	199	241	188	585	964	581
836	ENSG00000196562	420.654	1.31212	0.168533	7.78555	6.94118e-15	1.68506e-13	SULF2	55959	1.76696e-13	239	248	238	550	686	564
837	ENSG00000118523	444.373	1.95501	0.251403	7.77639	7.46232e-15	1.80799e-13	CTGF	1490	1.89586e-13	154	185	209	716	951	452
838	ENSG00000129493	447.922	1.52853	0.196562	7.77634	7.46535e-15	1.80799e-13	HEATR5A	25938	1.89586e-13	275	217	199	558	654	785
839	ENSG00000053371	382.509	-1.5358	0.197553	-7.77413	7.59653e-15	1.83756e-13	AKR7A2	8574	1.92687e-13	543	610	555	249	158	181
840	ENSG00000136026	1776.13	-1.07654	0.138517	-7.77191	7.73125e-15	1.86792e-13	CKAP4	10970	1.95871e-13	2549	2406	2275	1265	1066	1097
841	ENSG00000067182	3895.17	-1.46983	0.189169	-7.76993	7.85283e-15	1.89504e-13	TNFRSF1A	7132	1.98715e-13	6230	5243	5698	2191	1497	2512
842	ENSG00000167930	265.255	-1.52561	0.19638	-7.76869	7.92994e-15	1.91138e-13	FAM234A	83986	2.00428e-13	397	385	399	165	110	134
843	ENSG00000204308	327.047	-1.31273	0.169026	-7.76645	8.07187e-15	1.94328e-13	RNF5	6048	2.03773e-13	432	457	511	178	196	189
844	ENSG00000128923	127.516	1.82813	0.23542	7.76541	8.13798e-15	1.95688e-13	FAM63B	54629	2.05198e-13	64	55	49	184	195	218
845	ENSG00000218227	107.576	-1.95242	0.251448	-7.76469	8.18456e-15	1.96575e-13	RP11-889L3.1	NA	2.06129e-13	157	161	196	52	41	40
846	ENSG00000169627	698.701	-1.83843	0.236865	-7.76149	8.39368e-15	2.01359e-13	BOLA2B	107984053	2.11146e-13	1053	1176	1048	449	239	227
847	ENSG00000005108	468.774	1.38401	0.178326	7.76113	8.41763e-15	2.01695e-13	THSD7A	221981	2.11498e-13	267	242	270	558	710	766
848	ENSG00000072506	968.432	-1.43728	0.18522	-7.75986	8.50225e-15	2.03482e-13	HSD17B10	3028	2.13372e-13	1466	1400	1379	675	448	443
849	ENSG00000024422	1652.86	-1.10878	0.14291	-7.7586	8.58708e-15	2.05271e-13	EHD2	30846	2.15247e-13	2445	2160	2171	1170	994	978
850	ENSG00000172354	1641.58	-1.75763	0.226623	-7.75573	8.78377e-15	2.09726e-13	GNB2	2783	2.19919e-13	2621	2766	2214	1060	662	526
851	ENSG00000112651	299.582	-1.55997	0.201164	-7.7547	8.85531e-15	2.11185e-13	MRPL2	51069	2.21449e-13	426	461	455	194	131	130
852	ENSG00000114353	618.045	-1.45514	0.18769	-7.75286	8.98422e-15	2.14008e-13	GNAI2	2771	2.24409e-13	929	910	878	413	322	256
853	ENSG00000105048	406.109	-1.88375	0.242988	-7.75244	9.0145e-15	2.14477e-13	TNNT1	7138	2.24902e-13	654	605	659	255	125	139
854	ENSG00000055950	579.972	-1.17429	0.151487	-7.75174	9.06452e-15	2.15415e-13	MRPL43	84545	2.25885e-13	782	785	844	390	326	351
855	ENSG00000196465	319.898	-1.35723	0.175145	-7.74917	9.24951e-15	2.19554e-13	MYL6B	140465	2.30225e-13	436	484	461	205	163	170
856	ENSG00000119522	463.608	-1.25406	0.161841	-7.74876	9.27964e-15	2.20012e-13	DENND1A	57706	2.30705e-13	690	630	640	308	268	245
857	ENSG00000102226	906.396	-1.20801	0.155909	-7.74818	9.32226e-15	2.20765e-13	USP11	8237	2.31494e-13	1206	1283	1306	639	509	494
858	ENSG00000196083	105.211	2.11046	0.272489	7.74511	9.55008e-15	2.25896e-13	IL1RAP	3556	2.36875e-13	35	50	33	142	181	189
859	ENSG00000072364	1165.49	1.3619	0.175851	7.74463	9.58619e-15	2.26486e-13	AFF4	27125	2.37494e-13	739	631	588	1341	1864	1830
860	ENSG00000008018	1087.17	-1.06081	0.136987	-7.74394	9.63852e-15	2.27458e-13	PSMB1	5689	2.38513e-13	1463	1426	1521	756	650	707
861	ENSG00000166275	118.796	1.92616	0.248795	7.74196	9.78992e-15	2.30762e-13	BORCS7	119032	2.41978e-13	38	54	57	184	206	174
862	ENSG00000138668	2136.7	-0.969339	0.125218	-7.74121	9.84713e-15	2.31842e-13	HNRNPD	3184	2.4311e-13	2775	2917	2794	1465	1366	1503
863	ENSG00000114841	42.9656	3.39701	0.438844	7.74081	9.87883e-15	2.32319e-13	DNAH1	25981	2.4361e-13	7	9	6	79	71	85
864	ENSG00000244187	215.741	-1.59329	0.205853	-7.73996	9.94513e-15	2.33607e-13	TMEM141	85014	2.44961e-13	317	320	335	132	87	103
865	ENSG00000178464	1126.91	-1.62697	0.21022	-7.73937	9.9914e-15	2.34422e-13	RPL10P16	NA	2.45816e-13	1663	1561	1885	716	556	382
866	ENSG00000128510	119.576	2.85328	0.368782	7.73703	1.01769e-14	2.385e-13	CPA4	51200	2.50092e-13	37	41	8	180	268	183
867	ENSG00000177105	381.979	-1.54263	0.199422	-7.73553	1.02969e-14	2.41034e-13	RHOG	391	2.52749e-13	559	650	498	242	177	165
868	ENSG00000111206	1196.63	-1.65311	0.213727	-7.73466	1.03678e-14	2.42413e-13	FOXM1	2305	2.54195e-13	2037	2170	1240	670	501	561
869	ENSG00000134970	319.571	1.57142	0.203225	7.73245	1.055e-14	2.4639e-13	TMED7	51014	2.58365e-13	194	118	171	480	458	497
870	ENSG00000122359	2807.21	-1.05282	0.136195	-7.7302	1.0738e-14	2.50492e-13	ANXA11	311	2.62667e-13	3882	3777	3707	1993	1872	1613
871	ENSG00000100994	4960.9	-1.20372	0.155723	-7.72985	1.07677e-14	2.50895e-13	PYGB	5834	2.63089e-13	7628	6717	6410	3421	3071	2519
872	ENSG00000125457	237.081	-1.51383	0.195855	-7.7293	1.08142e-14	2.5169e-13	MIF4GD	57409	2.63922e-13	356	343	356	149	112	108
873	ENSG00000180747	82.2503	2.26983	0.294069	7.71871	1.17515e-14	2.73192e-13	SMG1P3	NA	2.8647e-13	31	30	24	116	134	159
874	ENSG00000114120	205.564	1.63881	0.212454	7.71371	1.22208e-14	2.83776e-13	SLC25A36	55186	2.97568e-13	114	83	102	275	304	356
875	ENSG00000167645	601.085	-1.60868	0.208581	-7.7125	1.23375e-14	2.8616e-13	YIF1B	90522	3.00068e-13	938	975	804	396	262	232
876	ENSG00000117226	120.765	2.36406	0.306645	7.70942	1.26391e-14	2.92821e-13	GBP3	2635	3.07052e-13	49	31	38	136	266	204
877	ENSG00000059588	352.352	1.50729	0.195522	7.70905	1.26756e-14	2.9333e-13	TARBP1	6894	3.07586e-13	199	198	153	430	552	582
878	ENSG00000106268	282.804	-2.00539	0.260394	-7.70136	1.34628e-14	3.11194e-13	NUDT1	4521	3.26319e-13	441	477	441	171	86	81
879	ENSG00000171988	445.415	1.47592	0.191669	7.70037	1.35668e-14	3.13241e-13	JMJD1C	221037	3.28465e-13	232	212	262	517	728	721
880	ENSG00000142871	408.856	1.96113	0.254722	7.69911	1.37021e-14	3.16004e-13	CYR61	3491	3.31363e-13	150	214	138	732	799	420
881	ENSG00000213523	539.407	-1.14703	0.148994	-7.69847	1.37702e-14	3.17215e-13	SRA1	10011	3.32632e-13	732	734	763	348	351	307
882	ENSG00000160563	196.191	-1.50168	0.195076	-7.69794	1.38277e-14	3.18179e-13	MED27	9442	3.33644e-13	289	315	266	112	98	97
883	ENSG00000005075	422.463	-1.60735	0.208871	-7.69539	1.41061e-14	3.24217e-13	POLR2J	5439	3.39975e-13	568	684	657	276	175	175
884	ENSG00000213722	229.824	-1.58004	0.205465	-7.69006	1.47069e-14	3.37644e-13	DDAH2	23564	3.54054e-13	328	356	350	142	94	109
885	ENSG00000121005	334.681	1.37364	0.178728	7.68563	1.52247e-14	3.49136e-13	CRISPLD1	83690	3.66105e-13	200	204	154	460	499	490
886	ENSG00000115295	266.583	1.78466	0.232248	7.68427	1.53866e-14	3.52294e-13	CLIP4	79745	3.69417e-13	130	127	103	350	546	344
887	ENSG00000180667	152.808	1.91667	0.249431	7.68419	1.53971e-14	3.52294e-13	YOD1	55432	3.69417e-13	75	76	40	246	247	233
888	ENSG00000140350	2263.87	-0.978855	0.127527	-7.67564	1.64593e-14	3.76174e-13	ANP32A	8125	3.94457e-13	2951	3029	3031	1624	1415	1533
889	ENSG00000111667	1538.52	-1.24966	0.162875	-7.67251	1.68659e-14	3.85031e-13	USP5	8078	4.03745e-13	2338	2307	1853	1047	807	879
890	ENSG00000141858	382.57	-1.56572	0.204121	-7.67057	1.71228e-14	3.90458e-13	SAMD1	NA	4.09436e-13	551	612	554	253	165	161
891	ENSG00000160932	1452.24	-1.87069	0.243913	-7.66948	1.72693e-14	3.93357e-13	LY6E	4061	4.12476e-13	2409	2361	2073	927	533	410
892	ENSG00000128272	4513.25	-1.49109	0.19446	-7.66786	1.74891e-14	3.97915e-13	ATF4	468	4.17255e-13	5374	6061	8539	2682	2460	1963
893	ENSG00000178951	447.292	-1.49369	0.194939	-7.66235	1.82565e-14	4.1491e-13	ZBTB7A	51341	4.35076e-13	678	625	678	302	199	202
894	ENSG00000197045	576.201	1.21448	0.158505	7.66207	1.8296e-14	4.15343e-13	GMFB	2764	4.35529e-13	393	337	311	833	822	761
895	ENSG00000005889	238.625	1.54942	0.202302	7.65893	1.87493e-14	4.25159e-13	ZFX	7543	4.45822e-13	118	134	113	312	336	419
896	ENSG00000132967	593.965	-1.55679	0.203273	-7.65861	1.87952e-14	4.25724e-13	HMGB1P5	NA	4.46416e-13	891	1009	760	390	263	251
897	ENSG00000129195	180.264	-1.85706	0.242559	-7.65611	1.91644e-14	4.33603e-13	FAM64A	54478	4.54677e-13	278	349	220	95	71	67
898	ENSG00000131797	45.8269	3.27418	0.427665	7.65595	1.91882e-14	4.33659e-13	CLUHP3	100132341	4.54735e-13	8	8	9	65	91	94
899	ENSG00000112514	674.653	-1.24057	0.162063	-7.6549	1.93462e-14	4.36743e-13	CUTA	51596	4.57969e-13	956	902	986	471	356	377
900	ENSG00000100029	1573.89	-1.4338	0.187352	-7.65296	1.96397e-14	4.42876e-13	PES1	23481	4.64401e-13	2239	2439	2216	1099	783	668
901	ENSG00000176853	631.495	1.31954	0.172442	7.65206	1.97779e-14	4.45497e-13	FAM91A1	157769	4.67149e-13	394	364	325	766	903	1037
902	ENSG00000171148	735.49	-1.32039	0.172649	-7.64787	2.04336e-14	4.59757e-13	TADA3	10474	4.82102e-13	1054	978	1119	491	339	432
903	ENSG00000185950	859.01	-1.28463	0.168157	-7.63947	2.18123e-14	4.90233e-13	IRS2	8660	5.14059e-13	1277	1250	1127	603	436	461
904	ENSG00000176946	459.039	-1.55053	0.203021	-7.6373	2.21821e-14	4.97992e-13	THAP4	51078	5.22196e-13	679	763	612	299	219	183
905	ENSG00000139116	574.164	1.30478	0.170849	7.63704	2.22275e-14	4.98461e-13	KIF21A	55605	5.22687e-13	351	333	308	685	925	843
906	ENSG00000245680	80.6339	2.35946	0.308959	7.6368	2.22679e-14	4.98815e-13	ZNF585B	92285	5.23059e-13	19	27	33	111	144	150
907	ENSG00000111678	269.717	-1.74993	0.229251	-7.63325	2.28913e-14	5.12215e-13	C12orf57	113246	5.3711e-13	410	371	467	165	91	115
908	ENSG00000090273	1400.13	-1.27043	0.166453	-7.63237	2.30485e-14	5.15165e-13	NUDC	10726	5.40203e-13	2114	1987	1839	999	738	724
909	ENSG00000142396	66.9064	2.63042	0.344691	7.63124	2.32502e-14	5.19101e-13	ERVK3-1	NA	5.4433e-13	21	17	18	91	107	148
910	ENSG00000225855	47.1184	3.25842	0.427073	7.62967	2.35356e-14	5.24896e-13	RUSC1-AS1	NA	5.50407e-13	9	14	4	80	81	95
911	ENSG00000168398	485.754	1.50335	0.197221	7.62265	2.48523e-14	5.53652e-13	BDKRB2	624	5.80561e-13	286	247	226	577	699	879
912	ENSG00000101745	134.383	1.78888	0.234712	7.62157	2.50607e-14	5.57646e-13	ANKRD12	23253	5.84749e-13	62	62	57	175	230	221
913	ENSG00000101160	1323.95	-1.09605	0.143811	-7.62144	2.50865e-14	5.57646e-13	CTSZ	1522	5.84749e-13	1884	1601	1928	879	784	868
914	ENSG00000256269	582.672	-1.29924	0.170541	-7.61831	2.57027e-14	5.70719e-13	HMBS	3145	5.98457e-13	845	896	744	390	290	329
915	ENSG00000172954	275.698	1.34173	0.176123	7.61811	2.57411e-14	5.70947e-13	LCLAT1	253558	5.98696e-13	158	166	145	375	422	390
916	ENSG00000125166	3604.36	-0.963797	0.126537	-7.61675	2.60145e-14	5.76381e-13	GOT2	2806	6.04394e-13	5176	4579	4540	2397	2493	2441
917	ENSG00000262814	246.863	-2.30964	0.303341	-7.61399	2.65766e-14	5.88191e-13	MRPL12	6182	6.16779e-13	428	470	334	136	60	52
918	ENSG00000114573	638.44	1.42981	0.187894	7.60969	2.74763e-14	6.07442e-13	ATP6V1A	523	6.36966e-13	354	402	281	785	1070	939
919	ENSG00000120129	3030.89	1.15708	0.152112	7.60677	2.81026e-14	6.20611e-13	DUSP1	1843	6.50774e-13	2133	1773	1724	4738	3860	3957
920	ENSG00000175066	175.836	1.65429	0.217507	7.60571	2.83336e-14	6.25034e-13	GK5	256356	6.55412e-13	90	88	76	228	266	307
921	ENSG00000122008	179.709	1.57979	0.20773	7.60499	2.84924e-14	6.27854e-13	POLK	51426	6.5837e-13	95	82	92	237	292	279
922	ENSG00000196154	1646.83	-1.17754	0.154873	-7.60325	2.88793e-14	6.35689e-13	S100A4	6275	6.66585e-13	2132	2071	2649	1061	1058	910
923	ENSG00000167863	1673.91	-1.16095	0.15274	-7.60086	2.94171e-14	6.46826e-13	ATP5H	10476	6.78264e-13	2200	2068	2672	994	984	1126
924	ENSG00000012061	765.967	-1.31425	0.172935	-7.59969	2.96844e-14	6.51996e-13	ERCC1	2067	6.83685e-13	1090	1121	1067	541	404	372
925	ENSG00000166822	116.695	1.84189	0.242527	7.59457	3.08821e-14	6.7757e-13	TMEM170A	124491	7.10502e-13	58	43	51	177	171	200
926	ENSG00000169564	851.569	-1.58372	0.20861	-7.59176	3.15595e-14	6.91013e-13	PCBP1	5093	7.24597e-13	1322	1472	1038	557	368	353
927	ENSG00000132792	590.673	-1.16564	0.15354	-7.59174	3.15629e-14	6.91013e-13	CTNNBL1	56259	7.24597e-13	838	772	842	394	375	324
928	ENSG00000152818	575.913	1.29098	0.170056	7.59152	3.16185e-14	6.91485e-13	UTRN	7402	7.25093e-13	351	356	295	702	908	844
929	ENSG00000164327	191.043	1.82792	0.240806	7.59082	3.1789e-14	6.94464e-13	RICTOR	253260	7.28216e-13	70	90	92	237	281	376
930	ENSG00000104517	777.582	1.12404	0.148164	7.58651	3.28632e-14	7.17159e-13	UBR5	51366	7.52015e-13	507	477	482	980	1036	1182
931	ENSG00000051523	952.271	-1.68453	0.222085	-7.58508	3.32275e-14	7.24331e-13	CYBA	1535	7.59535e-13	1340	1481	1538	641	339	375
932	ENSG00000106771	1004.04	1.27301	0.167984	7.5782	3.50371e-14	7.62958e-13	TMEM245	23731	8.0004e-13	678	610	474	1334	1396	1532
933	ENSG00000214160	585.585	-1.43893	0.190001	-7.57328	3.63928e-14	7.91632e-13	ALG3	10195	8.30107e-13	938	853	776	395	256	295
934	ENSG00000116679	797.448	1.3041	0.172234	7.57172	3.68328e-14	8.00345e-13	IVNS1ABP	10625	8.39244e-13	432	449	499	920	1284	1202
935	ENSG00000117399	834.309	-1.91685	0.25319	-7.5708	3.70931e-14	8.05137e-13	CDC20	991	8.44269e-13	1417	1653	888	480	290	278
936	ENSG00000069399	1180.91	-1.70219	0.224895	-7.56883	3.7661e-14	8.16592e-13	BCL3	102465879	8.5628e-13	1660	1630	2130	748	379	538
937	ENSG00000155903	119.022	1.98369	0.262246	7.56423	3.90156e-14	8.45059e-13	RASA2	5922	8.86131e-13	37	49	58	160	221	188
938	ENSG00000160752	1383.06	-1.21321	0.160407	-7.56332	3.92916e-14	8.50132e-13	FDPS	2224	8.9145e-13	2040	2049	1708	954	831	715
939	ENSG00000233426	241.923	-1.49922	0.198226	-7.56318	3.93342e-14	8.50147e-13	EIF3FP3	NA	8.91466e-13	368	335	370	149	128	102
940	ENSG00000239672	1212.73	-1.09881	0.145332	-7.56069	4.00925e-14	8.65615e-13	NME1	4830	9.07686e-13	1506	1729	1726	776	841	699
941	ENSG00000105669	616.87	-1.72673	0.228392	-7.56037	4.01911e-14	8.6682e-13	COPE	11316	9.0895e-13	933	938	972	410	240	208
942	ENSG00000176658	501.976	-1.2832	0.169773	-7.55834	4.08235e-14	8.79525e-13	MYO1D	4642	9.22272e-13	710	637	788	290	329	257
943	ENSG00000134744	329.401	1.5248	0.201873	7.55325	4.24539e-14	9.13682e-13	ZCCHC11	23318	9.5809e-13	175	158	177	380	514	573
944	ENSG00000175054	408.983	1.66165	0.220022	7.55221	4.27928e-14	9.2e-13	ATR	545	9.64714e-13	234	193	161	462	663	741
945	ENSG00000188186	440.474	-1.29317	0.171244	-7.55167	4.29709e-14	9.22851e-13	LAMTOR4	389541	9.67703e-13	617	651	609	299	221	245
946	ENSG00000132394	203.095	-1.50485	0.199307	-7.55037	4.34014e-14	9.31112e-13	EEFSEC	60678	9.76366e-13	325	301	275	120	92	106
947	ENSG00000229638	2006.57	-1.40257	0.18587	-7.54596	4.48951e-14	9.62141e-13	RPL4P4	NA	1.0089e-12	2693	2854	3189	1393	1057	853
948	ENSG00000224660	40.7453	3.99297	0.529215	7.5451	4.51957e-14	9.67559e-13	SH3BP5-AS1	100505696	1.01459e-12	7	5	2	62	66	102
949	ENSG00000125826	2216.09	-1.40437	0.186139	-7.54473	4.53222e-14	9.6922e-13	RBCK1	10616	1.01633e-12	2969	3398	3285	1540	1177	928
950	ENSG00000187134	12611.7	-1.16404	0.154288	-7.5446	4.53688e-14	9.6922e-13	AKR1C1	1645	1.01633e-12	18107	14390	19824	7654	7310	8386
951	ENSG00000185278	125.056	2.38515	0.316225	7.54257	4.60813e-14	9.83406e-13	ZBTB37	84614	1.0312e-12	32	38	51	165	161	304
952	ENSG00000128283	971.62	-1.91614	0.254081	-7.54145	4.64779e-14	9.90828e-13	CDC42EP1	11135	1.03898e-12	1349	1556	1705	600	372	248
953	ENSG00000248323	110.808	1.92455	0.255259	7.53958	4.71505e-14	1.00411e-12	LUCAT1	100505994	1.05292e-12	46	51	41	158	161	207
954	ENSG00000173171	504.715	-1.13445	0.150477	-7.53905	4.73425e-14	1.00715e-12	MTX1	4580	1.05609e-12	695	679	707	339	316	292
955	ENSG00000079459	3408.21	-1.02388	0.135827	-7.53813	4.76757e-14	1.01317e-12	FDFT1	2222	1.06241e-12	4691	4780	4237	2308	2412	2022
956	ENSG00000119906	288.8	1.54936	0.205582	7.53647	4.82863e-14	1.02507e-12	SLF2	55719	1.07489e-12	151	147	142	340	432	519
957	ENSG00000168268	687.413	-1.69216	0.224551	-7.53574	4.85561e-14	1.02973e-12	NT5DC2	64943	1.07977e-12	1191	1185	774	424	279	271
958	ENSG00000147804	204.36	-1.91495	0.254132	-7.53527	4.8732e-14	1.03238e-12	SLC39A4	55630	1.08255e-12	329	354	287	123	67	66
959	ENSG00000125995	501.319	-1.75084	0.232367	-7.5348	4.89086e-14	1.03504e-12	ROMO1	140823	1.08534e-12	721	758	840	328	166	195
960	ENSG00000108021	1277.82	1.36046	0.180569	7.53431	4.90924e-14	1.03785e-12	FAM208B	54906	1.08829e-12	756	760	632	1425	1975	2119
961	ENSG00000164081	501.211	-1.29903	0.172464	-7.53218	4.98983e-14	1.05378e-12	TEX264	51368	1.105e-12	760	664	714	338	244	287
962	ENSG00000196365	1444.84	-1.46372	0.194335	-7.53196	4.99845e-14	1.05451e-12	LONP1	9361	1.10576e-12	2105	2193	2065	1022	678	606
963	ENSG00000166405	55.1432	3.87243	0.51417	7.53143	5.01876e-14	1.05769e-12	RIC3	79608	1.1091e-12	9	6	6	62	75	173
964	ENSG00000159459	225.522	1.56726	0.20831	7.52369	5.32504e-14	1.12108e-12	UBR1	197131	1.17556e-12	117	128	96	287	383	342
965	ENSG00000068120	1011.55	-1.17561	0.156277	-7.52261	5.36947e-14	1.12926e-12	COASY	80347	1.18414e-12	1451	1394	1362	731	574	556
966	ENSG00000167552	3455.23	-1.30383	0.173328	-7.52232	5.38121e-14	1.13056e-12	TUBA1A	7846	1.1855e-12	5297	5580	3879	2262	1788	1927
967	ENSG00000189060	2113.74	-1.65321	0.219789	-7.52183	5.4016e-14	1.13367e-12	H1F0	3005	1.18877e-12	2497	3064	4063	1286	1017	757
968	ENSG00000180398	1730.08	1.26225	0.167825	7.52123	5.42616e-14	1.13764e-12	MCFD2	90411	1.19294e-12	1092	1068	894	2000	2793	2534
969	ENSG00000259884	45.5307	3.57267	0.475049	7.52063	5.4512e-14	1.14171e-12	RP11-1100L3.8	NA	1.19721e-12	8	8	5	74	62	117
970	ENSG00000173272	284.358	-1.95143	0.259502	-7.51991	5.48153e-14	1.1464e-12	MZT2A	100616378	1.20212e-12	460	483	414	176	88	86
971	ENSG00000108506	252.402	1.70484	0.226712	7.51983	5.48488e-14	1.1464e-12	INTS2	57508	1.20212e-12	139	121	95	312	372	475
972	ENSG00000067560	4925.95	-0.931473	0.123952	-7.51478	5.70057e-14	1.19026e-12	RHOA	387	1.24811e-12	6818	6518	6053	3510	3397	3259
973	ENSG00000108654	4931.76	1.0662	0.141912	7.51307	5.77551e-14	1.20467e-12	DDX5	100616408	1.26322e-12	3222	3383	2959	5808	7223	6995
974	ENSG00000196912	54.8913	3.36044	0.447416	7.51078	5.8776e-14	1.2247e-12	ANKRD36B	57730	1.28422e-12	6	16	7	72	86	142
975	ENSG00000136463	472.256	-1.14092	0.151978	-7.50713	6.04392e-14	1.25806e-12	TACO1	51204	1.31921e-12	610	676	664	294	309	281
976	ENSG00000174775	534.372	-1.60435	0.213759	-7.50543	6.12261e-14	1.27314e-12	HRAS	3265	1.33502e-12	840	869	704	357	223	212
977	ENSG00000109475	1749.73	-1.04906	0.139795	-7.50426	6.17743e-14	1.28322e-12	RPL34	6164	1.34559e-12	2147	2333	2599	1173	1182	1065
978	ENSG00000162695	181.129	1.65592	0.220761	7.50097	6.33456e-14	1.31452e-12	SLC30A7	148867	1.37841e-12	95	91	75	243	326	257
979	ENSG00000100243	1412.36	-1.41761	0.189016	-7.49995	6.38415e-14	1.32299e-12	CYB5R3	1727	1.38729e-12	2087	2095	1984	944	807	557
980	ENSG00000128185	219.471	-1.85881	0.247845	-7.49986	6.38841e-14	1.32299e-12	DGCR6L	85359	1.38729e-12	352	354	327	136	77	71
981	ENSG00000135404	3226.15	-1.11931	0.149283	-7.49789	6.48538e-14	1.3417e-12	CD63	967	1.40691e-12	4635	3740	4881	2188	1985	1928
982	ENSG00000134057	1699.83	-1.0722	0.143013	-7.49719	6.51993e-14	1.34747e-12	CCNB1	891	1.41296e-12	2290	2495	2127	1155	979	1154
983	ENSG00000204463	1529.87	-1.21035	0.161562	-7.49154	6.80679e-14	1.40533e-12	BAG6	7917	1.47363e-12	2302	2128	1980	1105	827	838
984	ENSG00000182117	1308.03	-1.04672	0.139732	-7.49094	6.83816e-14	1.41037e-12	NOP10	55505	1.47892e-12	1611	1810	1868	916	840	804
985	ENSG00000158710	5587.78	-1.15457	0.15415	-7.48991	6.89205e-14	1.42004e-12	TAGLN2	8407	1.48906e-12	7928	8208	6999	4092	3165	3134
986	ENSG00000139324	416.948	1.58847	0.212285	7.48271	7.28076e-14	1.49861e-12	TMTC3	160418	1.57145e-12	239	224	161	494	644	740
987	ENSG00000204394	1440.66	-1.44905	0.193815	-7.47646	7.63542e-14	1.57002e-12	VARS	7407	1.64632e-12	2372	2291	1663	954	709	655
988	ENSG00000131153	444.797	-1.55102	0.207471	-7.47584	7.6712e-14	1.57578e-12	GINS2	51659	1.65237e-12	663	787	541	281	191	207
989	ENSG00000075624	55143.8	-1.44128	0.1928	-7.47552	7.68968e-14	1.57798e-12	ACTB	60	1.65467e-12	77706	92584	71527	38204	27949	22893
990	ENSG00000099725	52.8969	2.88443	0.385948	7.47361	7.80238e-14	1.59949e-12	PRKY	5616	1.67723e-12	15	16	7	79	92	109
991	ENSG00000129354	554.994	-1.39906	0.187219	-7.47288	7.84576e-14	1.60676e-12	AP1M2	10053	1.68485e-12	817	847	750	366	315	234
992	ENSG00000136051	552.616	1.25611	0.168104	7.47223	7.88486e-14	1.61314e-12	KIAA1033	23325	1.69154e-12	372	287	319	706	780	851
993	ENSG00000182154	513.648	-1.77046	0.236979	-7.47097	7.96051e-14	1.62698e-12	MRPL41	64975	1.70605e-12	775	795	814	340	168	190
994	ENSG00000171714	142.708	1.7402	0.23331	7.45875	8.73458e-14	1.78338e-12	ANO5	203859	1.87006e-12	73	67	57	186	225	248
995	ENSG00000134285	412.775	-1.23699	0.165857	-7.45819	8.77161e-14	1.78914e-12	FKBP11	51303	1.8761e-12	539	580	620	276	233	228
996	ENSG00000167114	473.833	-1.34192	0.179939	-7.45765	8.80816e-14	1.7948e-12	SLC27A4	10999	1.88203e-12	745	691	603	319	236	249
997	ENSG00000165283	1434.86	-1.17982	0.158358	-7.45032	9.31135e-14	1.89543e-12	STOML2	30968	1.98755e-12	1979	2164	1830	1028	773	835
998	ENSG00000285294	156.873	1.76208	0.236642	7.44619	9.60708e-14	1.95366e-12	NA	NA	2.04862e-12	74	79	62	193	279	256
999	ENSG00000275395	178.268	-2.20753	0.296486	-7.44563	9.6481e-14	1.96004e-12	FCGBP	8857	2.0553e-12	420	184	275	60	53	78
1000	ENSG00000169689	607.45	-1.71386	0.23025	-7.44347	9.80763e-14	1.99046e-12	STRA13	201254	2.0872e-12	895	1068	831	397	204	250
1001	ENSG00000242071	340.03	-2.34446	0.315127	-7.43972	1.00897e-13	2.04433e-12	RPL7AP6	NA	2.14369e-12	462	679	564	188	86	62
1002	ENSG00000183978	533.824	-1.06165	0.142702	-7.43968	1.00932e-13	2.04433e-12	COA3	28958	2.14369e-12	722	722	722	345	346	347
1003	ENSG00000188486	628.663	-2.18114	0.293219	-7.43862	1.01741e-13	2.05866e-12	H2AFX	3014	2.15872e-12	1003	1385	703	348	155	177
1004	ENSG00000168003	9052.24	-1.24163	0.166933	-7.43794	1.0227e-13	2.0673e-12	SLC3A2	6520	2.16778e-12	12324	12756	13091	6740	4768	4634
1005	ENSG00000107902	273.738	-1.46114	0.19647	-7.43695	1.03038e-13	2.08075e-12	LHPP	64077	2.18187e-12	394	340	471	160	130	148
1006	ENSG00000135205	38.1343	4.61529	0.620608	7.43672	1.03219e-13	2.08234e-12	CCDC146	57639	2.18355e-12	2	5	2	59	62	99
1007	ENSG00000168300	202.305	1.86698	0.251102	7.43516	1.04444e-13	2.10496e-12	PCMTD1	115294	2.20726e-12	86	71	104	225	364	364
1008	ENSG00000126254	1125.74	-1.60081	0.215309	-7.43494	1.04613e-13	2.10627e-12	RBM42	79171	2.20863e-12	1692	1751	1637	785	461	428
1009	ENSG00000166479	344.485	1.43282	0.19276	7.43317	1.06023e-13	2.13048e-12	TMX3	54495	2.23403e-12	226	159	173	446	519	544
1010	ENSG00000133863	99.3101	2.85347	0.383884	7.43317	1.06026e-13	2.13048e-12	TEX15	56154	2.23403e-12	28	22	23	115	121	288
1011	ENSG00000105258	121.635	-2.07088	0.278641	-7.43208	1.06905e-13	2.14604e-12	POLR2I	5438	2.25034e-12	201	190	199	69	34	38
1012	ENSG00000112851	803.427	1.32073	0.17772	7.43154	1.07343e-13	2.15268e-12	ERBIN	55914	2.25731e-12	447	454	477	891	1287	1265
1013	ENSG00000132549	368.924	1.46287	0.196863	7.4309	1.07858e-13	2.16088e-12	VPS13B	157680	2.26591e-12	218	191	180	435	547	643
1014	ENSG00000174851	674.082	-1.56553	0.210824	-7.42578	1.12116e-13	2.24397e-12	YIF1A	10897	2.35303e-12	1049	1021	954	467	289	265
1015	ENSG00000112159	532.2	1.39375	0.187697	7.42553	1.12327e-13	2.246e-12	MDN1	23195	2.35516e-12	318	329	232	678	754	882
1016	ENSG00000228232	75.3621	-2.08336	0.280591	-7.42491	1.1286e-13	2.25443e-12	GAPDHP1	NA	2.364e-12	116	131	119	33	28	25
1017	ENSG00000033178	335.875	1.43945	0.193931	7.42246	1.14966e-13	2.29422e-12	UBA6	55236	2.40573e-12	182	199	162	397	529	547
1018	ENSG00000196358	136.345	-1.793	0.241596	-7.42148	1.15823e-13	2.30907e-12	NTNG2	84628	2.42129e-12	199	226	210	74	44	65
1019	ENSG00000106105	3857.76	-1.518	0.204569	-7.42048	1.16694e-13	2.32414e-12	GARS	2617	2.4371e-12	4519	4863	7775	1978	2217	1795
1020	ENSG00000071889	426.928	-1.47667	0.19903	-7.41932	1.1772e-13	2.34228e-12	FAM3A	60343	2.45612e-12	610	694	581	290	198	189
1021	ENSG00000101439	1681.72	-1.21805	0.164186	-7.4187	1.18276e-13	2.35105e-12	CST3	1471	2.46531e-12	2246	2229	2583	1206	969	858
1022	ENSG00000204673	1042.75	-1.43766	0.193816	-7.41769	1.19181e-13	2.3667e-12	AKT1S1	84335	2.48173e-12	1646	1533	1391	735	496	455
1023	ENSG00000117448	745.475	-1.06088	0.143098	-7.41362	1.22898e-13	2.43813e-12	AKR1A1	10327	2.55663e-12	1055	1032	937	512	474	463
1024	ENSG00000126243	247.922	-1.73566	0.234145	-7.41278	1.23676e-13	2.45118e-12	LRFN3	79414	2.57031e-12	414	396	334	156	86	102
1025	ENSG00000130726	5230.87	-1.45932	0.196898	-7.41157	1.24814e-13	2.47132e-12	TRIM28	10155	2.59144e-12	7940	8458	6618	3693	2422	2254
1026	ENSG00000198040	218.59	1.8663	0.251827	7.41106	1.25292e-13	2.47837e-12	ZNF84	7637	2.59882e-12	98	65	120	275	334	420
1027	ENSG00000148943	167.611	1.63171	0.220186	7.41057	1.25755e-13	2.48509e-12	LIN7C	55327	2.60587e-12	65	84	96	245	239	276
1028	ENSG00000170860	791.151	-1.0102	0.136389	-7.40674	1.29442e-13	2.55548e-12	LSM3	27258	2.67968e-12	1096	1061	1015	524	511	540
1029	ENSG00000232956	147.59	1.56588	0.211498	7.40376	1.32384e-13	2.61102e-12	SNHG15	NA	2.73792e-12	74	76	73	234	213	215
1030	ENSG00000213621	280.568	-1.74306	0.23548	-7.40216	1.33982e-13	2.63997e-12	RPSAP54	NA	2.76828e-12	396	507	394	172	123	92
1031	ENSG00000196689	36.1356	4.72751	0.638745	7.40125	1.34912e-13	2.6557e-12	TRPV1	7442	2.78478e-12	0	3	5	75	64	69
1032	ENSG00000185658	309.875	1.48624	0.200843	7.40004	1.36147e-13	2.67742e-12	BRWD1	54014	2.80755e-12	178	167	143	369	469	532
1033	ENSG00000188811	104.266	1.98871	0.268762	7.3995	1.36694e-13	2.68558e-12	NHLRC3	387921	2.8161e-12	48	41	37	136	169	196
1034	ENSG00000140553	956.625	-1.25691	0.169873	-7.39909	1.37119e-13	2.69133e-12	UNC45A	55898	2.82213e-12	1482	1355	1209	672	485	536
1035	ENSG00000141526	93.1222	-2.06956	0.279818	-7.3961	1.40245e-13	2.75003e-12	SLC16A3	102465472	2.88369e-12	134	127	191	40	32	36
1036	ENSG00000160551	1093.48	1.24038	0.167759	7.39383	1.42655e-13	2.79457e-12	TAOK1	100616122	2.93039e-12	717	629	605	1254	1652	1705
1037	ENSG00000130520	1316.58	-1.5084	0.204041	-7.39265	1.43931e-13	2.81685e-12	LSM4	25804	2.95375e-12	1883	1950	2013	934	592	528
1038	ENSG00000196950	945.109	1.18872	0.160817	7.39178	1.44881e-13	2.83273e-12	SLC39A10	57181	2.9704e-12	613	621	494	1171	1321	1450
1039	ENSG00000143368	1179.31	-1.21263	0.164062	-7.3913	1.45405e-13	2.83848e-12	SF3B4	10262	2.97643e-12	1602	1823	1519	844	646	643
1040	ENSG00000111321	2095.41	-1.06113	0.143566	-7.39125	1.45455e-13	2.83848e-12	LTBR	4055	2.97643e-12	2789	2853	2857	1515	1170	1388
1041	ENSG00000204681	55.8501	3.44355	0.465952	7.39036	1.46435e-13	2.85485e-12	GABBR1	2550	2.9936e-12	5	13	11	75	72	159
1042	ENSG00000198937	180.378	-1.48029	0.200354	-7.38836	1.48654e-13	2.89534e-12	CCDC167	154467	3.03606e-12	263	249	285	105	85	96
1043	ENSG00000136425	198.68	-1.66888	0.225898	-7.38776	1.49327e-13	2.90565e-12	CIB2	10518	3.04687e-12	349	274	285	120	76	89
1044	ENSG00000276141	50.9169	2.71711	0.368207	7.3793	1.59121e-13	3.09326e-12	WHAMMP3	NA	3.2436e-12	12	14	14	82	81	102
1045	ENSG00000257354	39.0922	3.90798	0.529614	7.37892	1.59576e-13	3.09913e-12	RP11-631N16.2	NA	3.24975e-12	2	7	6	58	66	96
1046	ENSG00000120896	525.312	-1.7031	0.230819	-7.3785	1.6008e-13	3.10596e-12	SORBS3	10174	3.25691e-12	830	849	733	347	221	172
1047	ENSG00000163170	519.89	-1.27236	0.172504	-7.37583	1.63325e-13	3.16588e-12	BOLA3	388962	3.31974e-12	711	712	784	364	266	283
1048	ENSG00000149231	172.081	1.79292	0.243174	7.373	1.66834e-13	3.23081e-12	CCDC82	79780	3.38783e-12	82	70	79	195	298	308
1049	ENSG00000079112	964.081	2.05772	0.279122	7.37211	1.67954e-13	3.2494e-12	CDH17	1015	3.40733e-12	474	256	390	894	1709	2061
1050	ENSG00000120798	184.834	1.45843	0.197857	7.37116	1.69154e-13	3.26951e-12	NR2C1	7181	3.42842e-12	105	91	100	252	281	280
1051	ENSG00000170043	677.549	-1.1733	0.159267	-7.36685	1.74701e-13	3.37351e-12	TRAPPC1	58485	3.53747e-12	887	924	1006	457	435	356
1052	ENSG00000148334	638.697	-1.38263	0.187739	-7.36465	1.77618e-13	3.42658e-12	PTGES2	80142	3.59312e-12	950	1009	811	443	316	303
1053	ENSG00000168813	443.28	1.28104	0.173948	7.36448	1.77832e-13	3.42745e-12	ZNF507	22847	3.59404e-12	267	248	261	582	565	738
1054	ENSG00000038382	623.006	1.38439	0.188017	7.36311	1.79675e-13	3.45968e-12	TRIO	7204	3.62782e-12	315	420	300	872	1047	783
1055	ENSG00000145725	514.465	1.45179	0.197233	7.36078	1.82832e-13	3.51714e-12	PPIP5K2	23262	3.68808e-12	317	255	254	583	877	801
1056	ENSG00000131016	2775.55	1.03861	0.14112	7.35978	1.84215e-13	3.54039e-12	AKAP12	9590	3.71246e-12	1747	2074	1631	3844	3713	3643
1057	ENSG00000101004	231.85	1.54436	0.209863	7.3589	1.85426e-13	3.56029e-12	NINL	22981	3.73333e-12	114	145	96	381	309	347
1058	ENSG00000139190	70.6405	2.56263	0.348268	7.35823	1.86364e-13	3.57491e-12	VAMP1	6843	3.74866e-12	23	19	19	112	88	163
1059	ENSG00000188906	500.331	1.96738	0.267435	7.35645	1.8886e-13	3.61937e-12	LRRK2	120892	3.79528e-12	211	188	212	561	604	1226
1060	ENSG00000166130	559.536	1.22429	0.16652	7.3522	1.94971e-13	3.73296e-12	IKBIP	121457	3.91439e-12	341	351	314	667	872	813
1061	ENSG00000182054	716.31	-1.15742	0.157483	-7.3495	1.98948e-13	3.80552e-12	IDH2	3418	3.99048e-12	1038	970	959	508	435	387
1062	ENSG00000170310	324.227	-1.39152	0.189344	-7.34915	1.99475e-13	3.812e-12	STX8	9482	3.99727e-12	422	422	564	194	176	166
1063	ENSG00000140299	652.945	1.15398	0.15711	7.34504	2.05693e-13	3.92713e-12	BNIP2	663	4.11799e-12	384	403	428	788	936	979
1064	ENSG00000099800	484.71	-1.89442	0.257971	-7.34356	2.07983e-13	3.96712e-12	TIMM13	26517	4.15993e-12	761	851	680	313	160	143
1065	ENSG00000263563	323.52	-1.21644	0.165673	-7.34245	2.09717e-13	3.99645e-12	UBBP4	NA	4.19068e-12	434	464	460	183	211	190
1066	ENSG00000172725	809.2	-1.64557	0.224245	-7.33828	2.16362e-13	4.11919e-12	CORO1B	57175	4.3194e-12	1318	1176	1185	549	352	274
1067	ENSG00000013306	1607.95	-1.28431	0.175053	-7.33667	2.18966e-13	4.16369e-12	SLC25A39	51629	4.36605e-12	2355	2425	2060	1167	806	835
1068	ENSG00000111860	59.5736	2.56585	0.349734	7.33659	2.19109e-13	4.16369e-12	CEP85L	387119	4.36605e-12	15	18	19	80	105	120
1069	ENSG00000105289	271.883	-1.8406	0.25097	-7.33396	2.23444e-13	4.2421e-12	TJP3	27134	4.44828e-12	404	346	526	156	118	81
1070	ENSG00000204172	48.7235	3.05173	0.416127	7.33364	2.23976e-13	4.24708e-12	AGAP9	642517	4.4535e-12	7	15	9	74	76	111
1071	ENSG00000100897	562.226	-1.10852	0.151157	-7.33356	2.24125e-13	4.24708e-12	DCAF11	80344	4.4535e-12	801	762	742	369	321	379
1072	ENSG00000115216	1611.46	-0.968125	0.132048	-7.33159	2.27442e-13	4.30591e-12	NRBP1	29959	4.51519e-12	2282	2109	2007	1086	1045	1140
1073	ENSG00000186812	143.235	1.91304	0.261025	7.32898	2.31903e-13	4.38627e-12	ZNF397	84307	4.59946e-12	73	46	62	180	223	277
1074	ENSG00000141905	921.073	-1.45748	0.198987	-7.32449	2.39805e-13	4.53151e-12	NFIC	4782	4.75176e-12	1345	1484	1222	649	426	399
1075	ENSG00000129566	307.787	1.42992	0.195302	7.32159	2.45053e-13	4.62636e-12	TEP1	7011	4.85122e-12	184	138	178	411	415	521
1076	ENSG00000068885	87.7745	2.374	0.324277	7.3209	2.46315e-13	4.64587e-12	IFT80	57560	4.87167e-12	27	29	30	98	153	191
1077	ENSG00000185122	711.03	-1.46526	0.20017	-7.32005	2.47879e-13	4.67104e-12	HSF1	3297	4.89806e-12	1015	1123	995	497	345	291
1078	ENSG00000167658	18091.3	-1.41748	0.193673	-7.31892	2.49973e-13	4.70613e-12	EEF2	1938	4.93486e-12	26435	27558	24988	12491	10092	6984
1079	ENSG00000197119	96.6042	1.8934	0.258963	7.31145	2.64269e-13	4.97065e-12	SLC25A29	123096	5.21224e-12	39	48	36	163	143	151
1080	ENSG00000204379	626.628	-1.39912	0.191385	-7.31052	2.66104e-13	4.99591e-12	XAGE1A	653220	5.23872e-12	783	879	1065	413	340	280
1081	ENSG00000204382	626.628	-1.39912	0.191385	-7.31052	2.66104e-13	4.99591e-12	XAGE1B	653220	5.23872e-12	783	879	1065	413	340	280
1082	ENSG00000196792	262.762	1.2948	0.17712	7.31031	2.66533e-13	4.99934e-12	STRN3	29966	5.24232e-12	146	163	147	350	380	390
1083	ENSG00000184402	110.646	1.8926	0.258937	7.30913	2.68883e-13	5.03877e-12	SS18L1	26039	5.28367e-12	46	50	45	204	141	177
1084	ENSG00000179271	377.168	-2.08317	0.285033	-7.30851	2.70123e-13	5.05733e-12	GADD45GIP1	90480	5.30312e-12	573	712	546	232	101	98
1085	ENSG00000198055	422.629	-1.88004	0.257307	-7.3066	2.73988e-13	5.12496e-12	GRK6	2870	5.37405e-12	685	743	567	270	124	148
1086	ENSG00000174748	9028.4	-1.06943	0.14642	-7.30383	2.7968e-13	5.22662e-12	RPL15	6138	5.48065e-12	11393	12575	12721	6562	5958	4962
1087	ENSG00000167969	591.69	-1.6142	0.221044	-7.30263	2.82201e-13	5.26887e-12	ECI1	1632	5.52495e-12	891	921	864	410	223	240
1088	ENSG00000065243	337.909	1.3633	0.186768	7.29942	2.89013e-13	5.3911e-12	PKN2	5586	5.65312e-12	217	177	173	416	524	520
1089	ENSG00000102780	117.267	2.16916	0.297247	7.29752	2.93125e-13	5.46278e-12	DGKH	160851	5.72828e-12	32	64	32	156	199	220
1090	ENSG00000121690	103.12	1.87488	0.256933	7.29715	2.93933e-13	5.47282e-12	DEPDC7	91614	5.73881e-12	52	37	44	147	176	163
1091	ENSG00000131495	316.471	-1.21661	0.16675	-7.29598	2.96486e-13	5.51529e-12	NDUFA2	4695	5.78335e-12	414	465	449	203	184	184
1092	ENSG00000167861	357.664	-1.46117	0.200433	-7.29008	3.09763e-13	5.757e-12	HID1	283987	6.0368e-12	612	410	552	208	199	165
1093	ENSG00000284770	65.4315	2.43996	0.334769	7.28848	3.13471e-13	5.82059e-12	NA	NA	6.10348e-12	25	24	12	98	112	121
1094	ENSG00000225178	713.068	-1.12455	0.154388	-7.28394	3.24214e-13	6.01455e-12	RPSAP58	NA	6.30687e-12	1029	980	925	467	489	389
1095	ENSG00000143761	4443.32	-1.22754	0.168558	-7.28262	3.27404e-13	6.06818e-12	ARF1	100500810	6.36311e-12	6413	6460	5810	3316	2374	2287
1096	ENSG00000144026	83.9158	2.40382	0.330119	7.28169	3.2967e-13	6.10462e-12	ZNF514	84874	6.40131e-12	22	19	39	106	151	166
1097	ENSG00000132341	6962.34	-0.916499	0.125914	-7.27875	3.36924e-13	6.23324e-12	RAN	5901	6.53619e-12	8805	9877	8625	5032	4714	4721
1098	ENSG00000267519	64.0264	2.56201	0.352261	7.27303	3.5152e-13	6.49735e-12	MIR24-2	407013	6.81314e-12	21	22	13	137	85	107
1099	ENSG00000228300	264.669	-1.91729	0.263655	-7.27197	3.54276e-13	6.54235e-12	C19orf24	55009	6.86032e-12	418	465	373	167	83	82
1100	ENSG00000139304	52.5865	3.30201	0.454222	7.2696	3.60552e-13	6.65219e-12	PTPRQ	374462	6.9755e-12	10	10	8	65	74	147
1101	ENSG00000130202	1346.13	-1.23394	0.169745	-7.26938	3.61139e-13	6.65696e-12	NECTIN2	5819	6.98051e-12	1929	1900	1839	998	724	688
1102	ENSG00000115760	1346.67	1.29861	0.178763	7.26446	3.74533e-13	6.89759e-12	BIRC6	57448	7.23283e-12	823	816	696	1477	2150	2118
1103	ENSG00000165752	209.147	-1.60829	0.221405	-7.26402	3.75741e-13	6.91357e-12	STK32C	282974	7.24958e-12	302	344	300	134	92	84
1104	ENSG00000136930	1008.72	-1.08266	0.14911	-7.26081	3.84791e-13	7.07368e-12	PSMB7	5695	7.41747e-12	1308	1359	1445	731	630	579
1105	ENSG00000105404	159.782	-2.12748	0.293055	-7.25967	3.88045e-13	7.12704e-12	RABAC1	10567	7.47343e-12	253	245	282	90	55	33
1106	ENSG00000204177	50.8059	3.06799	0.422735	7.25749	3.9435e-13	7.23629e-12	BMS1P1	399761	7.58799e-12	10	11	11	69	75	129
1107	ENSG00000115084	297.968	1.4255	0.196422	7.25733	3.94792e-13	7.23786e-12	SLC35F5	80255	7.58964e-12	180	136	168	378	500	425
1108	ENSG00000130811	801.261	-1.20207	0.165678	-7.25546	4.00289e-13	7.332e-12	EIF3G	8666	7.68835e-12	1077	1144	1131	581	462	413
1109	ENSG00000149179	304.037	-1.2447	0.171556	-7.25534	4.00654e-13	7.33207e-12	C11orf49	79096	7.68842e-12	408	417	459	197	168	177
1110	ENSG00000174501	34.9306	4.31269	0.594647	7.25252	4.09086e-13	7.47963e-12	ANKRD36C	NA	7.84316e-12	4	3	2	50	82	67
1111	ENSG00000105254	1000.16	-1.50144	0.20704	-7.25196	4.10792e-13	7.50407e-12	TBCB	1155	7.86879e-12	1369	1565	1501	714	431	421
1112	ENSG00000107938	196.366	1.44719	0.199696	7.24694	4.26282e-13	7.78003e-12	EDRF1	26098	8.15816e-12	110	100	106	252	297	313
1113	ENSG00000148335	220.484	-1.50174	0.20723	-7.24671	4.2701e-13	7.78631e-12	NTMT1	28989	8.16474e-12	298	377	303	135	98	112
1114	ENSG00000161960	47.4286	3.31476	0.457616	7.24355	4.37098e-13	7.95944e-12	EIF4A1	1973	8.34629e-12	4	10	12	75	64	119
1115	ENSG00000135968	368.408	1.61405	0.222831	7.24339	4.37596e-13	7.95944e-12	GCC2	9648	8.34629e-12	197	167	180	390	684	593
1116	ENSG00000100412	1611.27	-1.15111	0.158919	-7.24337	4.37681e-13	7.95944e-12	ACO2	50	8.34629e-12	2513	2102	2051	1121	1022	859
1117	ENSG00000198466	139.553	1.69541	0.23409	7.24258	4.40242e-13	7.99885e-12	ZNF587	84914	8.38761e-12	54	82	62	207	205	228
1118	ENSG00000180626	57.627	2.73915	0.378329	7.24013	4.4826e-13	8.13724e-12	ZNF594	84622	8.53273e-12	11	14	20	72	119	109
1119	ENSG00000148634	536.043	1.44732	0.200114	7.23246	4.7434e-13	8.60297e-12	HERC4	26091	9.02109e-12	311	308	243	619	962	773
1120	ENSG00000196159	92.5961	2.45443	0.339389	7.23191	4.76247e-13	8.62985e-12	FAT4	79633	9.04929e-12	23	22	41	110	152	208
1121	ENSG00000246705	726.808	-1.7707	0.244857	-7.23156	4.77461e-13	8.64412e-12	H2AFJ	55766	9.06425e-12	1023	1217	1133	493	241	254
1122	ENSG00000262580	35.9034	4.72192	0.653339	7.22737	4.92446e-13	8.90749e-12	RP11-334C17.5	NA	9.34041e-12	2	0	6	65	56	86
1123	ENSG00000188976	1160.87	-1.392	0.192643	-7.22578	4.98221e-13	9.00391e-12	NOC2L	26155	9.44152e-12	1782	1746	1516	830	588	504
1124	ENSG00000184844	105.56	-1.93193	0.267573	-7.22017	5.19235e-13	9.37534e-12	CYCSP45	NA	9.831e-12	138	178	186	55	35	40
1125	ENSG00000198556	64.2585	2.40192	0.33285	7.21622	5.34533e-13	9.64298e-12	ZNF789	285989	1.01116e-11	21	26	14	103	125	96
1126	ENSG00000152952	2032.64	1.24099	0.172016	7.2144	5.41734e-13	9.7572e-12	PLOD2	5352	1.02314e-11	1269	1265	1092	2493	3531	2546
1127	ENSG00000142230	2024.46	-0.951534	0.131894	-7.21437	5.41826e-13	9.7572e-12	SAE1	10055	1.02314e-11	2733	2837	2436	1432	1345	1363
1128	ENSG00000125991	1751.65	-0.968946	0.134365	-7.21132	5.54121e-13	9.96976e-12	ERGIC3	51614	1.04543e-11	2377	2161	2418	1220	1092	1242
1129	ENSG00000106541	22532.1	-1.39921	0.194162	-7.20638	5.7457e-13	1.03285e-11	AGR2	10551	1.08305e-11	38117	23805	36105	10629	14456	12080
1130	ENSG00000154874	42.1432	3.89894	0.54106	7.2061	5.75758e-13	1.03407e-11	CCDC144B	284047	1.08433e-11	0	9	7	55	88	94
1131	ENSG00000011304	3601.31	-1.40233	0.194649	-7.20444	5.82843e-13	1.04587e-11	PTBP1	100616459	1.0967e-11	5524	5842	4312	2553	1672	1705
1132	ENSG00000248124	65.0294	2.29989	0.319357	7.20162	5.95004e-13	1.06675e-11	RRN3P1	NA	1.1186e-11	24	22	20	90	113	121
1133	ENSG00000029993	1584.93	-0.960387	0.133408	-7.19888	6.07075e-13	1.08743e-11	HMGB3	3149	1.14028e-11	2107	2111	2064	1176	999	1053
1134	ENSG00000104969	738.44	-1.52888	0.212417	-7.19753	6.13153e-13	1.09735e-11	SGTA	6449	1.15068e-11	1073	1227	991	517	324	299
1135	ENSG00000112282	199.457	1.65978	0.230669	7.19549	6.22373e-13	1.11287e-11	MED23	9439	1.16696e-11	93	97	97	223	331	355
1136	ENSG00000147689	4224.53	-1.01502	0.141087	-7.19428	6.27929e-13	1.12181e-11	FAM83A	84985	1.17634e-11	5847	5212	5898	3154	2543	2693
1137	ENSG00000250067	35.1453	4.30809	0.598935	7.19293	6.34168e-13	1.13196e-11	YJEFN3	374887	1.18698e-11	2	1	7	60	58	83
1138	ENSG00000230650	67.7558	2.56364	0.356594	7.18924	6.51549e-13	1.16197e-11	AC112229.1	NA	1.21844e-11	11	21	27	89	121	138
1139	ENSG00000184967	305.208	-2.02298	0.281434	-7.18814	6.56822e-13	1.17034e-11	NOC4L	79050	1.22722e-11	475	542	453	192	90	79
1140	ENSG00000142484	94.3728	-2.18314	0.303847	-7.18499	6.72135e-13	1.19658e-11	TM4SF5	9032	1.25473e-11	158	130	177	50	28	24
1141	ENSG00000103018	3499.73	-0.98497	0.137107	-7.18393	6.77349e-13	1.2048e-11	CYB5B	80777	1.26336e-11	4728	4561	4661	2415	2577	2056
1142	ENSG00000285979	38.9946	4.85229	0.675701	7.18111	6.9147e-13	1.22884e-11	NA	NA	1.28857e-11	3	1	4	65	46	115
1143	ENSG00000137968	52.3738	3.18956	0.444209	7.18031	6.95551e-13	1.23501e-11	SLC44A5	204962	1.29504e-11	16	7	8	60	96	128
1144	ENSG00000124942	5496.28	1.10595	0.154029	7.18012	6.9651e-13	1.23563e-11	AHNAK	79026	1.29569e-11	3814	3637	3009	6817	8560	7140
1145	ENSG00000173480	117.186	1.77566	0.247322	7.17957	6.99294e-13	1.23904e-11	ZNF417	147687	1.29926e-11	64	49	45	162	196	187
1146	ENSG00000164070	601.938	1.37341	0.191297	7.1795	6.99649e-13	1.23904e-11	HSPA4L	22824	1.29926e-11	382	346	277	699	991	917
1147	ENSG00000148834	1120.63	-1.05859	0.147449	-7.17938	7.00286e-13	1.23908e-11	GSTO1	9446	1.29931e-11	1427	1488	1628	641	788	752
1148	ENSG00000078403	292.082	1.23926	0.172707	7.17552	7.20319e-13	1.27342e-11	MLLT10	8028	1.33531e-11	160	171	191	424	398	409
1149	ENSG00000145390	347.625	1.37954	0.192293	7.17412	7.27719e-13	1.28444e-11	USP53	54532	1.34687e-11	207	182	190	407	514	586
1150	ENSG00000126458	382.09	-1.49282	0.208084	-7.1741	7.27819e-13	1.28444e-11	RRAS	6237	1.34687e-11	530	611	551	256	197	148
1151	ENSG00000267002	113.64	2.06473	0.288336	7.16085	8.01765e-13	1.41371e-11	RP11-242D8.1	NA	1.48242e-11	37	43	51	141	164	245
1152	ENSG00000187051	596.253	-1.57725	0.220322	-7.15886	8.1353e-13	1.43321e-11	RPS19BP1	91582	1.50287e-11	839	990	851	412	266	220
1153	ENSG00000178605	451.9	-1.71971	0.240272	-7.15735	8.2251e-13	1.44674e-11	GTPBP6	8225	1.51705e-11	751	731	599	303	153	176
1154	ENSG00000251474	43.1291	3.05265	0.426507	7.15733	8.22633e-13	1.44674e-11	RPL32P3	NA	1.51705e-11	12	6	9	69	70	92
1155	ENSG00000163430	1017.46	1.56848	0.219187	7.15591	8.31216e-13	1.46057e-11	FSTL1	406975	1.53155e-11	565	617	357	1368	1310	1887
1156	ENSG00000275700	1188.98	-0.966461	0.135063	-7.15561	8.33002e-13	1.46244e-11	AATF	26574	1.53351e-11	1483	1528	1708	814	812	789
1157	ENSG00000235508	92.842	-2.24709	0.314126	-7.15346	8.46148e-13	1.48423e-11	RPS2P7	NA	1.55637e-11	155	184	122	47	27	22
1158	ENSG00000120868	209.946	1.70719	0.238731	7.15113	8.60638e-13	1.50835e-11	APAF1	317	1.58166e-11	129	95	71	271	358	336
1159	ENSG00000178904	266.653	1.45052	0.202858	7.15044	8.65026e-13	1.51473e-11	DPY19L3	147991	1.58835e-11	168	150	110	354	401	417
1160	ENSG00000173542	112.688	1.77858	0.24876	7.14976	8.69311e-13	1.52092e-11	MOB1B	92597	1.59484e-11	43	62	49	167	165	191
1161	ENSG00000178057	325.802	-1.58869	0.222256	-7.148	8.80504e-13	1.53853e-11	NDUFAF3	25915	1.61331e-11	481	526	460	223	134	131
1162	ENSG00000064726	752.321	1.08414	0.151671	7.14794	8.80895e-13	1.53853e-11	BTBD1	53339	1.61331e-11	510	482	454	909	1055	1103
1163	ENSG00000171222	323.905	-1.97291	0.276039	-7.14721	8.85619e-13	1.54545e-11	SCAND1	51282	1.62057e-11	502	571	477	208	95	91
1164	ENSG00000224858	279.172	-1.25987	0.176355	-7.14395	9.06844e-13	1.58113e-11	RPL29P11	NA	1.65798e-11	357	401	424	176	161	155
1165	ENSG00000240602	118.946	2.00991	0.281383	7.14297	9.13346e-13	1.5911e-11	AADACP1	201651	1.66843e-11	49	45	49	144	255	173
1166	ENSG00000196123	77.5616	2.12535	0.297746	7.13814	9.46054e-13	1.64667e-11	KIAA0895L	653319	1.7267e-11	20	33	34	126	119	133
1167	ENSG00000142945	414.517	-1.20019	0.168168	-7.13684	9.5499e-13	1.6608e-11	KIF2C	11004	1.74152e-11	611	606	516	275	226	253
1168	ENSG00000100605	1294.59	-1.52155	0.213228	-7.13581	9.6217e-13	1.67185e-11	ITPK1	3705	1.75311e-11	1962	2121	1679	850	704	452
1169	ENSG00000146540	536.916	-1.70908	0.239622	-7.1324	9.86322e-13	1.71235e-11	C7orf50	84310	1.79558e-11	867	900	701	364	192	198
1170	ENSG00000100526	498.206	-1.24535	0.174636	-7.13111	9.95618e-13	1.72701e-11	CDKN3	1033	1.81095e-11	731	691	680	336	237	314
1171	ENSG00000006534	2676.6	-1.10795	0.155382	-7.1305	1.00003e-12	1.73319e-11	ALDH3B1	221	1.81743e-11	3580	3295	4096	1848	1795	1446
1172	ENSG00000170515	2003.16	-0.943427	0.132341	-7.12878	1.01264e-12	1.75354e-11	PA2G4	5036	1.83877e-11	2500	2859	2549	1411	1405	1295
1173	ENSG00000123080	256.844	-1.48596	0.208506	-7.12669	1.02813e-12	1.77884e-11	CDKN2C	1031	1.8653e-11	430	377	328	158	107	141
1174	ENSG00000141429	1795	1.17182	0.164474	7.12465	1.04349e-12	1.80389e-11	GALNT1	2589	1.89156e-11	1234	1086	990	2056	2760	2644
1175	ENSG00000183604	99.882	1.8478	0.259375	7.12406	1.04794e-12	1.81004e-11	SMG1P5	595101	1.89801e-11	50	42	38	137	173	159
1176	ENSG00000114942	4465.69	-0.979509	0.137501	-7.12367	1.05087e-12	1.81355e-11	EEF1B2	1933	1.9017e-11	5817	5891	6070	2860	3418	2738
1177	ENSG00000169857	325.938	-1.15601	0.162305	-7.12245	1.06024e-12	1.82816e-11	AVEN	57099	1.91702e-11	469	428	453	204	207	195
1178	ENSG00000090013	1587.65	-1.35109	0.18981	-7.1181	1.09429e-12	1.88528e-11	BLVRB	645	1.97691e-11	2189	2196	2460	1157	829	695
1179	ENSG00000182796	38.4566	3.21887	0.452217	7.11797	1.09526e-12	1.88536e-11	TMEM198B	440104	1.97699e-11	7	8	7	61	64	83
1180	ENSG00000050426	246.242	1.6477	0.231498	7.11754	1.09874e-12	1.88974e-11	LETMD1	25875	1.98158e-11	121	87	149	317	361	442
1181	ENSG00000213178	2143.04	-0.984373	0.138317	-7.11678	1.10476e-12	1.89848e-11	RP11-641D5.1	NA	1.99075e-11	2693	2676	3172	1385	1531	1401
1182	ENSG00000072864	251.05	-1.31988	0.185578	-7.11226	1.14157e-12	1.96007e-11	NDE1	619553	2.05534e-11	353	378	345	156	122	153
1183	ENSG00000108479	286.969	-1.80658	0.254057	-7.11091	1.15279e-12	1.97768e-11	GALK1	2584	2.0738e-11	452	511	376	183	111	88
1184	ENSG00000205403	157.047	2.33381	0.328242	7.11003	1.16017e-12	1.98866e-11	CFI	3426	2.08531e-11	52	35	69	169	227	391
1185	ENSG00000174405	118.998	1.84974	0.260241	7.1078	1.17907e-12	2.01934e-11	LIG4	3981	2.11748e-11	57	47	51	146	223	190
1186	ENSG00000184787	521.145	1.33792	0.18827	7.10638	1.19128e-12	2.03854e-11	UBE2G2	7327	2.13761e-11	321	346	219	746	724	771
1187	ENSG00000224831	413.761	-1.13333	0.159561	-7.1028	1.22255e-12	2.09028e-11	RP11-651P23.4	NA	2.19187e-11	616	570	519	270	257	251
1188	ENSG00000138085	1126.6	-1.12958	0.159038	-7.10258	1.22445e-12	2.09177e-11	ATRAID	51374	2.19343e-11	1457	1460	1721	616	696	808
1189	ENSG00000163444	971.24	-0.96174	0.135427	-7.10153	1.23388e-12	2.1061e-11	TMEM183A	653659	2.20846e-11	1347	1295	1208	654	640	684
1190	ENSG00000197375	864.931	1.24421	0.17523	7.10042	1.24376e-12	2.12119e-11	SLC22A5	6584	2.22428e-11	628	490	422	1131	1222	1297
1191	ENSG00000183010	603.62	-1.80433	0.254122	-7.10027	1.24516e-12	2.1218e-11	PYCR1	5831	2.22492e-11	916	1053	848	393	247	165
1192	ENSG00000165813	207.094	1.55737	0.219356	7.09971	1.25019e-12	2.12858e-11	CCDC186	100302224	2.23203e-11	120	96	98	249	319	360
1193	ENSG00000100296	519.654	-1.1506	0.162078	-7.09909	1.25585e-12	2.13642e-11	THOC5	8563	2.24026e-11	673	749	728	341	350	277
1194	ENSG00000127603	1444.22	1.27107	0.179066	7.09832	1.26279e-12	2.14642e-11	MACF1	643314	2.25075e-11	921	933	684	1686	2282	2160
1195	ENSG00000134590	835.896	-0.97647	0.137568	-7.09809	1.26493e-12	2.14827e-11	FAM127A	8933	2.25268e-11	1166	1096	1063	591	553	546
1196	ENSG00000139117	127.751	1.70011	0.239526	7.09782	1.26744e-12	2.15073e-11	CPNE8	144402	2.25526e-11	68	58	53	172	225	189
1197	ENSG00000168743	403.725	1.62203	0.228549	7.09709	1.2741e-12	2.16023e-11	NPNT	255743	2.26522e-11	246	185	162	492	544	792
1198	ENSG00000167085	1398.78	-1.1245	0.158554	-7.09219	1.32005e-12	2.23626e-11	PHB	5245	2.34495e-11	2011	2039	1704	1024	807	807
1199	ENSG00000134318	1337.66	1.22824	0.17319	7.09188	1.323e-12	2.23939e-11	ROCK2	9475	2.34823e-11	904	821	676	1562	1943	2121
1200	ENSG00000167196	843.758	1.09936	0.1552	7.08352	1.40535e-12	2.37679e-11	FBXO22	26263	2.49231e-11	525	519	567	1017	1308	1127
1201	ENSG00000143294	600.064	-1.15755	0.16342	-7.08328	1.40787e-12	2.37907e-11	PRCC	5546	2.4947e-11	762	886	838	429	339	346
1202	ENSG00000125445	1012.77	-0.983163	0.138803	-7.08314	1.40925e-12	2.37942e-11	MRPS7	51081	2.49507e-11	1313	1410	1312	735	633	673
1203	ENSG00000173456	316.166	-1.64993	0.232986	-7.08169	1.42409e-12	2.40249e-11	RNF26	79102	2.51925e-11	563	543	332	183	139	137
1204	ENSG00000065357	160.162	1.82548	0.257827	7.08023	1.43914e-12	2.42586e-11	DGKA	1606	2.54377e-11	61	62	89	190	308	251
1205	ENSG00000139631	34.3236	4.28727	0.605546	7.08	1.44155e-12	2.4279e-11	CSAD	51380	2.54591e-11	4	5	1	50	58	87
1206	ENSG00000227081	118.578	-1.85536	0.262131	-7.07798	1.46274e-12	2.46155e-11	RP11-543P15.1	NA	2.58119e-11	145	223	190	55	41	58
1207	ENSG00000213563	260.985	-1.91118	0.270033	-7.07757	1.46706e-12	2.46677e-11	C8orf82	414919	2.58666e-11	367	457	414	168	79	82
1208	ENSG00000269821	38.9646	3.68028	0.5202	7.07473	1.49735e-12	2.51563e-11	KCNQ1OT1	10984	2.63789e-11	3	6	8	54	62	101
1209	ENSG00000137404	144.641	-1.6732	0.23656	-7.07305	1.51563e-12	2.54422e-11	NRM	11270	2.66788e-11	213	242	206	87	54	66
1210	ENSG00000143217	39.1872	3.79567	0.536777	7.07123	1.53572e-12	2.57582e-11	NECTIN4	81607	2.70101e-11	2	7	7	57	105	57
1211	ENSG00000147955	1569.47	-1.11768	0.158083	-7.07021	1.54699e-12	2.59242e-11	SIGMAR1	10280	2.71842e-11	2262	2241	1943	1162	931	877
1212	ENSG00000012817	157.787	1.52985	0.216383	7.0701	1.54817e-12	2.59242e-11	KDM5D	8284	2.71842e-11	72	86	87	216	224	263
1213	ENSG00000179085	186.793	-2.02268	0.286118	-7.06939	1.55615e-12	2.60363e-11	DPM3	54344	2.73018e-11	269	325	306	113	45	63
1214	ENSG00000184009	43295.4	-1.29211	0.182797	-7.06857	1.56539e-12	2.61694e-11	ACTG1	71	2.74413e-11	61905	67962	54586	31116	24937	19267
1215	ENSG00000138685	210.562	1.33612	0.189071	7.06672	1.58636e-12	2.64981e-11	FGF2	2247	2.77859e-11	110	131	117	294	314	297
1216	ENSG00000132256	191.097	1.44553	0.204652	7.06337	1.62509e-12	2.71227e-11	TRIM5	85363	2.8441e-11	120	100	87	267	281	291
1217	ENSG00000214425	155.582	1.94288	0.275125	7.0618	1.64358e-12	2.74087e-11	LRRC37A4P	NA	2.87409e-11	58	78	57	180	229	333
1218	ENSG00000213463	518.08	1.31292	0.185938	7.06109	1.65204e-12	2.75271e-11	SYNJ2BP	55333	2.8865e-11	302	288	302	572	804	840
1219	ENSG00000107874	473.731	-1.17165	0.165963	-7.05972	1.66839e-12	2.77769e-11	CUEDC2	79004	2.91269e-11	614	620	735	323	282	268
1220	ENSG00000128626	1364.45	-1.41654	0.200675	-7.05887	1.67865e-12	2.79247e-11	MRPS12	6183	2.92819e-11	2026	2246	1685	973	658	599
1221	ENSG00000213918	79.8705	2.02063	0.286262	7.05865	1.6813e-12	2.79459e-11	DNASE1	1773	2.93042e-11	35	32	27	116	121	148
1222	ENSG00000120137	831.614	1.11807	0.158425	7.05739	1.69659e-12	2.8177e-11	PANK3	79646	2.95465e-11	560	571	442	1068	1218	1131
1223	ENSG00000159377	1557.85	-1.01471	0.143881	-7.05247	1.7577e-12	2.91681e-11	PSMB4	5692	3.05857e-11	1985	2133	2135	1172	981	941
1224	ENSG00000164342	58.4736	2.99906	0.425258	7.05232	1.75961e-12	2.91759e-11	TLR3	7098	3.05939e-11	16	11	12	55	130	127
1225	ENSG00000125821	270.541	-1.36822	0.194058	-7.05057	1.7819e-12	2.95213e-11	DTD1	92675	3.09561e-11	392	385	394	175	159	119
1226	ENSG00000141564	538.635	-1.29324	0.183448	-7.04965	1.79368e-12	2.96924e-11	RPTOR	57521	3.11355e-11	782	811	703	378	308	250
1227	ENSG00000110921	405.617	-1.48019	0.210026	-7.04762	1.82001e-12	3.01036e-11	MVK	4598	3.15667e-11	629	674	490	271	175	196
1228	ENSG00000143977	1071.85	-1.04827	0.14876	-7.04672	1.83184e-12	3.02746e-11	SNRPG	6637	3.17461e-11	1321	1396	1618	663	676	758
1229	ENSG00000088002	767.872	-1.41974	0.201527	-7.0449	1.8559e-12	3.06281e-11	SULT2B1	6820	3.21167e-11	1078	1014	1263	528	309	416
1230	ENSG00000141759	653.721	-1.02468	0.145451	-7.04488	1.85625e-12	3.06281e-11	TXNL4A	10907	3.21167e-11	895	855	880	470	403	419
1231	ENSG00000281398	294.326	1.33033	0.188868	7.04373	1.87155e-12	3.08555e-11	SNHG4	NA	3.23551e-11	168	152	183	362	478	423
1232	ENSG00000174938	602.931	-1.29179	0.183431	-7.04236	1.8901e-12	3.1136e-11	SEZ6L2	26470	3.26493e-11	891	790	888	431	335	282
1233	ENSG00000105700	404.118	-1.31551	0.186804	-7.0422	1.89233e-12	3.11475e-11	KXD1	79036	3.26613e-11	579	613	538	285	196	213
1234	ENSG00000204764	74.4778	1.9992	0.283932	7.04111	1.90715e-12	3.1366e-11	RANBP17	64901	3.28904e-11	30	31	28	111	125	121
1235	ENSG00000102189	176.585	1.77128	0.251583	7.04054	1.91493e-12	3.14684e-11	EEA1	8411	3.29979e-11	92	87	60	204	318	299
1236	ENSG00000126461	1254.6	-1.61738	0.229844	-7.03685	1.96632e-12	3.22867e-11	SCAF1	58506	3.38559e-11	2002	2081	1594	879	514	456
1237	ENSG00000145920	14679.7	-1.36688	0.194291	-7.0352	1.98979e-12	3.26458e-11	CPLX2	10814	3.42325e-11	23058	20038	20373	8651	5781	10176
1238	ENSG00000205542	8434.29	-1.09829	0.156152	-7.03345	2.01491e-12	3.30312e-11	TMSB4X	7114	3.46366e-11	10208	12430	11857	6304	4736	5071
1239	ENSG00000108106	2225.93	-1.96257	0.279042	-7.03324	2.01799e-12	3.30549e-11	UBE2S	27338	3.46615e-11	3536	4261	2832	1459	653	614
1240	ENSG00000110711	318.66	-1.58691	0.225733	-7.03004	2.0647e-12	3.37928e-11	AIP	9049	3.54353e-11	458	472	505	220	123	134
1241	ENSG00000154864	208.522	1.99877	0.284344	7.0294	2.07425e-12	3.39218e-11	PIEZO2	63895	3.55704e-11	113	87	50	276	289	436
1242	ENSG00000119403	440.723	-1.34233	0.191015	-7.02738	2.10441e-12	3.43873e-11	PHF19	26147	3.60586e-11	674	714	509	279	213	257
1243	ENSG00000143384	2155.03	1.01948	0.145115	7.02533	2.13563e-12	3.48693e-11	MCL1	4170	3.65641e-11	1464	1224	1584	2756	2984	2919
1244	ENSG00000197121	80.7707	2.1348	0.304036	7.02156	2.19407e-12	3.57947e-11	PGAP1	80055	3.75344e-11	24	37	30	107	129	159
1245	ENSG00000152082	234.012	-1.86671	0.265891	-7.0206	2.20921e-12	3.60128e-11	MZT2B	80097	3.77631e-11	364	406	332	151	79	71
1246	ENSG00000163482	101.747	1.88403	0.268457	7.018	2.25071e-12	3.66598e-11	STK36	27148	3.84416e-11	40	39	51	140	147	193
1247	ENSG00000160410	869.781	-1.31302	0.18711	-7.01738	2.26072e-12	3.67934e-11	SHKBP1	92799	3.85817e-11	1205	1405	1111	621	469	407
1248	ENSG00000105568	2826.18	-1.20461	0.171757	-7.01349	2.32438e-12	3.77991e-11	PPP2R1A	5518	3.96362e-11	4040	4146	3641	2141	1517	1473
1249	ENSG00000153561	379.819	1.18205	0.168643	7.00918	2.39723e-12	3.89276e-11	RMND5A	64795	4.08196e-11	222	250	225	511	586	485
1250	ENSG00000119777	1441.94	-1.08978	0.155479	-7.00916	2.39761e-12	3.89276e-11	TMEM214	54867	4.08196e-11	2207	2041	1637	961	927	877
1251	ENSG00000107679	431.245	1.23591	0.176353	7.00819	2.41419e-12	3.91654e-11	PLEKHA1	59338	4.10689e-11	283	241	247	518	683	616
1252	ENSG00000163714	1168.43	1.11034	0.158474	7.00645	2.44433e-12	3.96228e-11	U2SURP	23350	4.15485e-11	701	821	697	1359	1728	1705
1253	ENSG00000163923	171.466	-1.44986	0.207191	-6.99772	2.60163e-12	4.2139e-11	RPL39L	116832	4.41871e-11	278	255	220	101	86	89
1254	ENSG00000102595	233.643	1.57588	0.225249	6.99617	2.63046e-12	4.25719e-11	UGGT2	55757	4.4641e-11	135	95	122	278	353	419
1255	ENSG00000137161	375.277	-1.30953	0.187183	-6.99597	2.63426e-12	4.25994e-11	CNPY3	10695	4.46698e-11	497	515	593	233	172	242
1256	ENSG00000186908	170.525	1.62071	0.231735	6.99384	2.67471e-12	4.32192e-11	ZDHHC17	23390	4.53198e-11	79	83	89	222	228	323
1257	ENSG00000125817	1321.98	-1.58107	0.226081	-6.99341	2.68289e-12	4.33168e-11	CENPB	1059	4.54221e-11	2103	2148	1695	943	529	514
1258	ENSG00000159363	281.039	-1.53667	0.219773	-6.99207	2.70852e-12	4.36855e-11	ATP13A2	23400	4.58088e-11	458	454	341	180	139	112
1259	ENSG00000270055	42.6938	2.9008	0.414874	6.992	2.71003e-12	4.36855e-11	CTD-3092A11.2	NA	4.58088e-11	9	9	12	79	60	86
1260	ENSG00000055332	624.399	1.1457	0.163914	6.98965	2.75575e-12	4.43873e-11	EIF2AK2	5610	4.65446e-11	436	349	381	759	920	902
1261	ENSG00000138018	602.579	1.17205	0.167705	6.98875	2.77344e-12	4.46368e-11	EPT1	85465	4.68063e-11	389	339	383	711	849	944
1262	ENSG00000165997	272.228	1.25705	0.179962	6.98507	2.84721e-12	4.57877e-11	ARL5B	221079	4.80131e-11	147	176	159	354	411	386
1263	ENSG00000137460	87.9827	2.13443	0.305743	6.98114	2.92797e-12	4.70492e-11	FHDC1	85462	4.93359e-11	36	38	24	159	106	165
1264	ENSG00000066248	98.6909	-1.88872	0.2706	-6.97972	2.95759e-12	4.74876e-11	NGEF	25791	4.97956e-11	139	183	145	47	31	48
1265	ENSG00000178999	296.371	-1.6152	0.231498	-6.97716	3.01207e-12	4.83241e-11	AURKB	9212	5.06728e-11	405	561	376	184	112	142
1266	ENSG00000278600	33.713	3.69092	0.529063	6.97633	3.02987e-12	4.85712e-11	RP11-81A1.6	NA	5.09319e-11	5	5	5	48	64	75
1267	ENSG00000170604	452.502	-1.84599	0.264621	-6.97596	3.03783e-12	4.86604e-11	IRF2BP1	26145	5.10254e-11	749	758	618	304	134	153
1268	ENSG00000169230	942.51	-1.71457	0.245812	-6.97512	3.05602e-12	4.89131e-11	PRELID1	27166	5.12904e-11	1482	1692	1161	644	332	345
1269	ENSG00000102119	830.549	-1.29866	0.18622	-6.97378	3.08526e-12	4.93422e-11	EMD	2010	5.17404e-11	1231	1222	1091	605	455	380
1270	ENSG00000022277	731.865	-1.03387	0.148268	-6.973	3.10261e-12	4.9543e-11	RTFDC1	51507	5.19509e-11	1055	930	965	519	484	439
1271	ENSG00000113441	370.169	1.41228	0.202536	6.97299	3.10269e-12	4.9543e-11	LNPEP	4012	5.19509e-11	213	219	174	433	526	656
1272	ENSG00000167965	488.199	-1.54037	0.221057	-6.96819	3.21037e-12	5.1222e-11	MLST8	64223	5.37115e-11	747	831	602	324	244	181
1273	ENSG00000066136	461.698	-1.09525	0.157182	-6.96803	3.21418e-12	5.12425e-11	NFYC	4802	5.37331e-11	627	636	625	326	266	291
1274	ENSG00000149289	110.687	1.91699	0.27512	6.96785	3.21831e-12	5.12682e-11	ZC3H12C	85463	5.376e-11	38	63	38	148	176	201
1275	ENSG00000101224	2400.71	-1.34582	0.193176	-6.96683	3.24159e-12	5.15985e-11	CDC25B	994	5.41063e-11	3721	3696	2921	1729	1058	1280
1276	ENSG00000023191	1332.47	-1.54354	0.221723	-6.96156	3.36536e-12	5.34915e-11	RNH1	6050	5.60913e-11	2129	2061	1764	964	565	513
1277	ENSG00000133243	370.611	-1.70989	0.245619	-6.96154	3.36578e-12	5.34915e-11	BTBD2	55643	5.60913e-11	583	577	544	256	141	123
1278	ENSG00000128833	471.561	1.26521	0.181758	6.96092	3.38054e-12	5.3684e-11	MYO5C	55930	5.62931e-11	289	285	256	540	764	694
1279	ENSG00000121073	874.635	-0.963119	0.138371	-6.96042	3.39263e-12	5.38338e-11	SLC35B1	10237	5.64502e-11	1163	1118	1188	577	564	639
1280	ENSG00000169967	426.122	1.15983	0.166642	6.96001	3.40259e-12	5.39496e-11	MAP3K2	10746	5.65717e-11	266	258	267	514	602	651
1281	ENSG00000022840	1885.84	-0.880738	0.126556	-6.95928	3.42018e-12	5.41862e-11	RNF10	9921	5.68198e-11	2541	2361	2430	1331	1385	1266
1282	ENSG00000136238	3219.4	-0.869295	0.124918	-6.95895	3.42823e-12	5.42715e-11	RAC1	5879	5.69092e-11	4019	4189	4276	2404	2295	2134
1283	ENSG00000162517	439.951	-1.0364	0.149033	-6.95417	3.54633e-12	5.60973e-11	PEF1	553115	5.88237e-11	594	604	576	288	286	291
1284	ENSG00000143622	203.337	1.41878	0.20403	6.95381	3.55545e-12	5.61978e-11	RIT1	6016	5.89291e-11	111	112	109	249	304	335
1285	ENSG00000077348	299.886	-1.79222	0.257934	-6.94837	3.69542e-12	5.83647e-11	EXOSC5	56915	6.12014e-11	416	513	468	199	114	90
1286	ENSG00000019186	3876.79	1.36555	0.196679	6.94304	3.83763e-12	6.05635e-11	CYP24A1	1591	6.3507e-11	1828	2025	2651	5173	4562	7022
1287	ENSG00000204514	64.7305	2.20733	0.317965	6.94206	3.86416e-12	6.09348e-11	ZNF814	730051	6.38964e-11	27	18	24	100	97	122
1288	ENSG00000106348	662.866	-1.34842	0.194267	-6.94105	3.8921e-12	6.13277e-11	IMPDH1	3614	6.43084e-11	988	1077	792	466	332	324
1289	ENSG00000266338	153.242	1.5973	0.23027	6.93663	4.01576e-12	6.32272e-11	NBPF15	284565	6.63002e-11	82	86	60	218	208	265
1290	ENSG00000271533	40.0967	5.72383	0.825521	6.9336	4.10275e-12	6.45467e-11	RP3-368A4.6	NA	6.76839e-11	2	1	1	53	59	124
1291	ENSG00000172888	169.185	1.59662	0.230319	6.93222	4.14283e-12	6.51269e-11	ZNF621	285268	6.82922e-11	77	91	84	203	257	303
1292	ENSG00000107854	506.927	1.11192	0.160423	6.9312	4.1729e-12	6.55487e-11	TNKS2	80351	6.87346e-11	348	309	305	625	701	755
1293	ENSG00000153250	418.276	1.09592	0.158137	6.93018	4.20296e-12	6.59699e-11	RBMS1	100616364	6.91762e-11	258	283	258	530	593	587
1294	ENSG00000139546	308.455	-1.27465	0.18396	-6.92894	4.23994e-12	6.64988e-11	TARBP2	6895	6.97309e-11	416	499	395	199	161	181
1295	ENSG00000001497	948.853	-1.03064	0.148878	-6.92268	4.43185e-12	6.94552e-11	LAS1L	81887	7.28309e-11	1308	1329	1185	699	606	565
1296	ENSG00000169221	538.04	-1.26219	0.18233	-6.92253	4.43663e-12	6.94764e-11	TBC1D10B	26000	7.28531e-11	785	808	685	380	313	257
1297	ENSG00000170373	86.7204	-2.44331	0.353011	-6.92134	4.47377e-12	7.0004e-11	CST1	1469	7.34064e-11	127	94	219	26	21	34
1298	ENSG00000106263	3727.48	-0.97107	0.140305	-6.92116	4.47971e-12	7.0043e-11	EIF3B	8662	7.34472e-11	5200	5277	4333	2703	2480	2372
1299	ENSG00000122861	449.148	1.48131	0.214047	6.92049	4.50096e-12	7.0321e-11	PLAU	5328	7.37387e-11	214	269	228	625	506	852
1300	ENSG00000067798	83.2742	2.5249	0.364988	6.91776	4.58834e-12	7.1631e-11	NAV3	89795	7.51125e-11	21	32	21	119	212	95
1301	ENSG00000224126	380.016	-1.77942	0.257241	-6.91731	4.603e-12	7.17565e-11	UBE2SP2	NA	7.5244e-11	591	675	500	255	138	121
1302	ENSG00000249353	896.335	-0.962222	0.139104	-6.9173	4.60344e-12	7.17565e-11	NPM1P27	NA	7.5244e-11	1125	1282	1146	613	587	624
1303	ENSG00000038219	661.386	1.29902	0.187821	6.91627	4.63678e-12	7.22206e-11	BOD1L1	259282	7.57306e-11	358	389	399	725	966	1130
1304	ENSG00000168894	369.18	-1.29361	0.18734	-6.90513	5.01575e-12	7.80633e-11	RNF181	51255	8.18574e-11	457	533	583	244	220	177
1305	ENSG00000101182	2139.2	-1.12342	0.162875	-6.89742	5.29542e-12	8.23529e-11	PSMA7	5688	8.63555e-11	3087	2965	2746	1635	1167	1235
1306	ENSG00000125398	396.661	-1.17367	0.170191	-6.89619	5.3414e-12	8.30043e-11	SOX9	6662	8.70385e-11	563	524	562	255	270	206
1307	ENSG00000171130	343.009	-1.3239	0.191983	-6.89591	5.35206e-12	8.31064e-11	ATP6V0E2	155066	8.71456e-11	481	563	427	231	185	171
1308	ENSG00000167515	440.367	-1.31221	0.190386	-6.89237	5.4872e-12	8.51397e-11	TRAPPC2L	51693	8.92777e-11	654	680	550	309	238	211
1309	ENSG00000263266	723.62	-1.12609	0.163421	-6.89072	5.55093e-12	8.60058e-11	RPS7P1	NA	9.01859e-11	866	1004	1108	510	419	435
1310	ENSG00000196683	1191.75	-0.926308	0.134429	-6.89071	5.5515e-12	8.60058e-11	TOMM7	54543	9.01859e-11	1582	1522	1581	868	755	842
1311	ENSG00000137845	1356.49	1.20017	0.174222	6.88872	5.62955e-12	8.71293e-11	ADAM10	102	9.1364e-11	889	883	696	1555	1946	2171
1312	ENSG00000144824	823.14	1.0719	0.155604	6.88865	5.6326e-12	8.71293e-11	PHLDB2	90102	9.1364e-11	590	543	458	1070	1079	1198
1313	ENSG00000167524	31.5491	4.5262	0.657392	6.88509	5.77512e-12	8.92658e-11	SGK494	124923	9.36044e-11	1	3	4	55	49	78
1314	ENSG00000225663	285.183	-1.8427	0.267647	-6.88482	5.7862e-12	8.93691e-11	MCRIP1	348262	9.37127e-11	435	541	363	184	100	89
1315	ENSG00000088854	118.763	1.65901	0.240998	6.88392	5.8226e-12	8.98628e-11	C20orf194	25943	9.42304e-11	56	51	64	157	183	201
1316	ENSG00000168393	486.555	-1.61217	0.234227	-6.88294	5.86306e-12	9.035e-11	DTYMK	1841	9.47413e-11	732	895	573	312	172	235
1317	ENSG00000111057	63987.7	-0.941362	0.136768	-6.88294	5.86307e-12	9.035e-11	KRT18	3875	9.47413e-11	88126	86538	77796	49281	41747	40438
1318	ENSG00000075213	203.225	1.29988	0.188927	6.88032	5.97165e-12	9.19535e-11	SEMA3A	10371	9.64227e-11	116	122	114	271	304	291
1319	ENSG00000109113	914.93	-1.30259	0.189332	-6.87991	5.98884e-12	9.21482e-11	RAB34	100861437	9.66268e-11	1257	1425	1225	653	531	399
1320	ENSG00000130396	536.645	1.11542	0.162145	6.87913	6.02186e-12	9.25861e-11	AFDN	4301	9.7086e-11	298	373	346	673	781	748
1321	ENSG00000175061	2105.03	-0.905551	0.13166	-6.87793	6.07296e-12	9.33011e-11	LRRC75A-AS1	125144	9.78358e-11	2534	2757	2943	1517	1481	1397
1322	ENSG00000198315	222.436	1.55469	0.226081	6.87672	6.12466e-12	9.40241e-11	ZKSCAN8	7745	9.85939e-11	108	91	140	267	369	359
1323	ENSG00000168701	305.756	-1.28382	0.186702	-6.87629	6.14321e-12	9.42377e-11	TMEM208	29100	9.88178e-11	429	429	442	210	178	145
1324	ENSG00000264350	151.046	-1.59475	0.231955	-6.87525	6.18792e-12	9.48519e-11	SNRPGP2	NA	9.94619e-11	188	242	251	85	61	79
1325	ENSG00000014164	343.068	-1.33925	0.194848	-6.87331	6.27284e-12	9.6071e-11	ZC3H3	23144	1.0074e-10	493	518	465	245	167	171
1326	ENSG00000197565	180.4	1.84299	0.26814	6.87322	6.27692e-12	9.6071e-11	COL4A6	1288	1.0074e-10	76	87	73	261	388	197
1327	ENSG00000226564	57.9505	-2.28817	0.332991	-6.87156	6.35036e-12	9.71218e-11	FTH1P20	NA	1.01842e-10	106	81	102	26	19	15
1328	ENSG00000198258	810.037	-1.02253	0.148827	-6.87064	6.39153e-12	9.76778e-11	UBL5	59286	1.02425e-10	990	1053	1215	555	512	536
1329	ENSG00000257151	31.6659	4.32884	0.630155	6.86949	6.4433e-12	9.83948e-11	PWAR6	NA	1.03177e-10	1	5	4	48	55	78
1330	ENSG00000089248	1547.57	-0.96985	0.141207	-6.8683	6.4971e-12	9.91e-11	ERP29	10961	1.03916e-10	1952	1923	2273	1116	979	1043
1331	ENSG00000269343	179.484	1.52935	0.222669	6.86825	6.49924e-12	9.91e-11	ZNF587B	100293516	1.03916e-10	81	106	90	223	267	310
1332	ENSG00000278970	316.817	-1.34382	0.19566	-6.86812	6.50527e-12	9.91175e-11	HEIH	100859930	1.03935e-10	380	424	561	182	174	181
1333	ENSG00000116717	215.213	1.91016	0.278143	6.86757	6.53064e-12	9.94294e-11	GADD45A	1647	1.04262e-10	53	94	126	338	407	274
1334	ENSG00000197150	495.666	-1.28372	0.18696	-6.86631	6.5884e-12	1.00234e-10	ABCB8	11194	1.05105e-10	741	687	680	356	229	281
1335	ENSG00000198146	381.772	1.23595	0.180056	6.86425	6.68429e-12	1.01616e-10	ZNF770	54989	1.06555e-10	237	212	234	462	522	624
1336	ENSG00000031698	1402.74	-1.19068	0.173473	-6.86379	6.70588e-12	1.01868e-10	SARS	6301	1.06819e-10	1767	1762	2325	861	973	729
1337	ENSG00000047932	284.626	1.28449	0.187212	6.8612	6.82861e-12	1.03655e-10	GOPC	57120	1.08693e-10	163	155	179	371	468	372
1338	ENSG00000177674	489.12	-1.1964	0.174417	-6.85939	6.9154e-12	1.04894e-10	AGTRAP	57085	1.09992e-10	690	715	639	355	255	281
1339	ENSG00000176087	1094.33	-1.13835	0.165984	-6.85817	6.97498e-12	1.05719e-10	SLC35A4	113829	1.10857e-10	1665	1604	1246	767	641	644
1340	ENSG00000095380	699.612	-1.1136	0.162395	-6.85739	7.01284e-12	1.06213e-10	NANS	54187	1.11375e-10	1007	828	1036	486	398	442
1341	ENSG00000198918	7337.3	-1.12706	0.164363	-6.8571	7.02701e-12	1.06348e-10	RPL39	6170	1.11517e-10	9042	9101	12055	4110	5216	4500
1342	ENSG00000183172	224.234	-1.36549	0.199159	-6.85627	7.06797e-12	1.06889e-10	SMDT1	91689	1.12084e-10	303	303	364	118	146	111
1343	ENSG00000277258	270.207	-1.38699	0.202301	-6.85603	7.08e-12	1.06991e-10	PCGF2	7703	1.12191e-10	383	408	383	189	127	131
1344	ENSG00000138399	306.881	1.29614	0.1891	6.85424	7.16936e-12	1.08261e-10	FASTKD1	79675	1.13522e-10	188	159	186	365	468	476
1345	ENSG00000111700	65.2089	2.19307	0.31997	6.85397	7.18265e-12	1.08381e-10	SLCO1B3	28234	1.13648e-10	27	22	21	89	126	106
1346	ENSG00000100079	123.255	-2.06279	0.301046	-6.85206	7.27961e-12	1.09762e-10	LGALS2	3957	1.15097e-10	234	134	229	60	32	51
1347	ENSG00000036054	221.96	1.31666	0.192246	6.84885	7.44485e-12	1.1217e-10	TBC1D23	55773	1.17622e-10	124	130	127	282	356	313
1348	ENSG00000172336	301.81	-1.47309	0.215117	-6.84787	7.49586e-12	1.12855e-10	POP7	10248	1.1834e-10	421	488	423	210	144	125
1349	ENSG00000197879	3150.2	-1.13517	0.165784	-6.8473	7.52558e-12	1.13218e-10	MYO1C	4641	1.18721e-10	4761	4584	3643	2297	1890	1726
1350	ENSG00000115163	182.895	-1.4358	0.209735	-6.8458	7.60489e-12	1.14327e-10	CENPA	1058	1.19883e-10	250	307	244	108	85	103
1351	ENSG00000198408	958.721	1.12254	0.164053	6.84259	7.77746e-12	1.16835e-10	MGEA5	10724	1.22513e-10	573	646	592	1085	1381	1476
1352	ENSG00000078808	1025.7	-1.26604	0.185042	-6.84191	7.8144e-12	1.17303e-10	SDF4	51150	1.23004e-10	1539	1372	1436	775	521	510
1353	ENSG00000136938	1988.45	-0.906803	0.132542	-6.84162	7.83015e-12	1.17437e-10	ANP32B	10541	1.23145e-10	2461	2568	2753	1411	1279	1459
1354	ENSG00000127995	127.782	1.86824	0.273074	6.84153	7.83493e-12	1.17437e-10	CASD1	64921	1.23145e-10	77	38	50	177	225	200
1355	ENSG00000243970	39.5959	3.34913	0.489568	6.84099	7.86496e-12	1.178e-10	PPIEL	NA	1.23526e-10	8	5	8	59	55	103
1356	ENSG00000240891	97.2921	2.24209	0.327772	6.84039	7.89755e-12	1.18201e-10	PLCXD2	257068	1.23946e-10	44	37	21	135	221	127
1357	ENSG00000126351	321.108	-1.14706	0.1677	-6.83998	7.92025e-12	1.18453e-10	THRA	7067	1.24211e-10	434	460	434	221	190	188
1358	ENSG00000125124	214.525	1.45341	0.2125	6.83959	7.94182e-12	1.18689e-10	BBS2	583	1.24457e-10	109	104	132	256	342	345
1359	ENSG00000169084	431.141	-1.28255	0.187532	-6.8391	7.96931e-12	1.19012e-10	DHRSX	207063	1.24796e-10	675	508	650	250	214	290
1360	ENSG00000100577	266.27	-1.27398	0.186284	-6.83893	7.97857e-12	1.1903e-10	GSTZ1	2954	1.24816e-10	352	371	408	156	177	134
1361	ENSG00000138107	1415.33	-0.996535	0.145716	-6.83887	7.98229e-12	1.1903e-10	ACTR1A	10121	1.24816e-10	2026	1987	1644	1006	927	903
1362	ENSG00000137496	36.2527	3.38435	0.495019	6.83681	8.0975e-12	1.2066e-10	IL18BP	10068	1.26524e-10	6	8	5	53	57	88
1363	ENSG00000080822	288.182	1.27023	0.185893	6.83312	8.30896e-12	1.2372e-10	CLDND1	56650	1.29733e-10	176	164	166	417	459	347
1364	ENSG00000170291	458.641	-1.17998	0.172704	-6.83234	8.35377e-12	1.24296e-10	ELP5	23587	1.30337e-10	581	622	707	320	245	277
1365	ENSG00000165338	75.0413	2.01487	0.294958	6.83104	8.42985e-12	1.25336e-10	HECTD2	143279	1.31428e-10	32	29	28	110	108	143
1366	ENSG00000227471	1894.98	-1.09934	0.160993	-6.82846	8.58295e-12	1.27519e-10	AKR1B15	441282	1.33717e-10	2954	2080	2717	1195	1177	1247
1367	ENSG00000109929	303.874	1.19136	0.174656	6.82116	9.03063e-12	1.34072e-10	SC5D	6309	1.40588e-10	211	177	167	418	430	421
1368	ENSG00000073605	30.7496	4.11707	0.603585	6.82103	9.03921e-12	1.34101e-10	GSDMB	55876	1.40619e-10	4	2	4	43	65	66
1369	ENSG00000197261	47.7489	2.71405	0.397915	6.82067	9.06143e-12	1.34333e-10	C6orf141	135398	1.40862e-10	16	10	12	64	80	105
1370	ENSG00000135069	2381.72	-1.29058	0.189261	-6.81908	9.16279e-12	1.35736e-10	PSAT1	29968	1.42334e-10	2752	3624	3769	1531	1557	1057
1371	ENSG00000123243	126.59	1.9182	0.281423	6.81607	9.35637e-12	1.38503e-10	ITIH5	80760	1.45234e-10	43	48	69	144	233	223
1372	ENSG00000101639	222.368	1.48252	0.217549	6.81466	9.44892e-12	1.39771e-10	CEP192	55125	1.46564e-10	130	130	91	275	338	371
1373	ENSG00000170439	250.13	-1.35383	0.198676	-6.81427	9.4741e-12	1.40041e-10	METTL7B	196410	1.46848e-10	408	309	362	136	162	124
1374	ENSG00000125735	35.5424	4.96145	0.728124	6.81402	9.49085e-12	1.40187e-10	TNFSF14	8740	1.47e-10	5	1	0	42	62	103
1375	ENSG00000113108	35.5053	3.5593	0.522372	6.81372	9.51073e-12	1.40378e-10	APBB3	102465499	1.47201e-10	8	5	4	56	51	89
1376	ENSG00000244306	217.197	1.26744	0.186024	6.81334	9.5361e-12	1.40651e-10	LINC01296	642477	1.47487e-10	123	139	120	297	319	304
1377	ENSG00000253671	48.6374	2.68078	0.393485	6.81292	9.56359e-12	1.40954e-10	RP11-806O11.1	NA	1.47804e-10	10	13	17	64	85	104
1378	ENSG00000249855	1799.49	-0.972554	0.142757	-6.81264	9.58261e-12	1.41131e-10	EEF1A1P19	NA	1.47991e-10	2298	2514	2340	1057	1297	1291
1379	ENSG00000127884	1480.76	-0.896946	0.131675	-6.81183	9.63633e-12	1.4182e-10	ECHS1	1892	1.48712e-10	1928	1961	1891	1097	1054	953
1380	ENSG00000179115	653.975	-1.44743	0.212499	-6.81145	9.66178e-12	1.42091e-10	FARSA	2193	1.48997e-10	1060	1022	790	463	312	277
1381	ENSG00000105135	380.716	-1.27696	0.187512	-6.81004	9.75708e-12	1.43389e-10	ILVBL	10994	1.50358e-10	520	590	507	266	182	219
1382	ENSG00000086619	88.7814	2.11644	0.310829	6.809	9.82761e-12	1.44321e-10	ERO1B	56605	1.51335e-10	30	35	34	97	164	172
1383	ENSG00000141510	764.239	-1.19704	0.175818	-6.80843	9.86722e-12	1.44798e-10	TP53	7157	1.51835e-10	909	1012	1273	505	478	409
1384	ENSG00000179604	926.05	-1.13204	0.166273	-6.80829	9.87683e-12	1.44834e-10	CDC42EP4	23580	1.51873e-10	1294	1308	1214	702	501	537
1385	ENSG00000179406	39.2323	2.9533	0.433806	6.80788	9.90492e-12	1.45141e-10	LINC00174	285908	1.52195e-10	7	10	9	73	56	80
1386	ENSG00000106133	33.2307	3.44712	0.506428	6.80672	9.98474e-12	1.46205e-10	NSUN5P2	260294	1.53311e-10	5	8	4	72	57	53
1387	ENSG00000133121	178.56	1.46721	0.215592	6.8055	1.00701e-11	1.47349e-10	STARD13	90627	1.5451e-10	101	96	88	226	252	309
1388	ENSG00000108528	894.56	-1.22079	0.179394	-6.80505	1.01015e-11	1.47702e-10	SLC25A11	8402	1.54881e-10	1326	1320	1111	665	484	462
1389	ENSG00000123144	715.613	-1.3616	0.200146	-6.80305	1.02427e-11	1.49659e-10	C19orf43	79002	1.56932e-10	962	1060	1070	532	352	318
1390	ENSG00000158825	111.849	-1.88691	0.277419	-6.80168	1.03404e-11	1.50978e-10	CDA	978	1.58315e-10	150	154	224	60	37	45
1391	ENSG00000094975	409.242	1.29082	0.1898	6.80093	1.03947e-11	1.51661e-10	SUCO	51430	1.59032e-10	280	214	218	486	645	612
1392	ENSG00000014216	1897.56	-1.27319	0.187257	-6.79914	1.05242e-11	1.5344e-10	CAPN1	823	1.60898e-10	2931	2632	2491	1363	1144	825
1393	ENSG00000159111	595.766	-1.07207	0.157739	-6.79648	1.07203e-11	1.56186e-10	MRPL10	124995	1.63778e-10	756	747	920	402	384	366
1394	ENSG00000121741	403.616	1.22238	0.179874	6.79573	1.07765e-11	1.56893e-10	ZMYM2	7750	1.64518e-10	235	243	248	467	580	648
1395	ENSG00000137309	3569.08	-1.92428	0.283367	-6.79076	1.11541e-11	1.62274e-10	HMGA1	3159	1.70161e-10	5477	7067	4405	2082	1627	756
1396	ENSG00000197283	59.8441	2.38662	0.351557	6.78871	1.13137e-11	1.64478e-10	SYNGAP1	100847012	1.72472e-10	26	18	13	98	83	120
1397	ENSG00000078061	925.946	-1.17648	0.173423	-6.78388	1.16991e-11	1.69959e-10	ARAF	369	1.7822e-10	1480	1322	1049	635	514	555
1398	ENSG00000275216	358.189	1.31105	0.193327	6.78151	1.18925e-11	1.72646e-10	RP11-54H7.4	NA	1.81037e-10	235	159	223	478	562	492
1399	ENSG00000215089	88.2801	-2.00222	0.295308	-6.78009	1.20101e-11	1.74228e-10	KRT18P11	NA	1.82696e-10	128	146	151	50	27	28
1400	ENSG00000102572	1750.27	-1.12161	0.165442	-6.77947	1.20619e-11	1.74854e-10	STK24	8428	1.83352e-10	2614	2048	2532	992	1023	1293
1401	ENSG00000100417	174.622	-1.58288	0.23353	-6.77806	1.21803e-11	1.76446e-10	PMM1	5372	1.85021e-10	251	239	296	113	81	68
1402	ENSG00000164104	443.186	-1.07537	0.158674	-6.77722	1.22506e-11	1.77337e-10	HMGB2	3148	1.85956e-10	547	637	620	302	286	268
1403	ENSG00000104177	241.176	1.31175	0.193573	6.77653	1.23099e-11	1.78069e-10	MYEF2	50804	1.86723e-10	145	129	141	293	379	359
1404	ENSG00000167513	345.279	-2.17402	0.320899	-6.77479	1.2459e-11	1.80096e-10	CDT1	81620	1.88849e-10	512	782	402	204	91	81
1405	ENSG00000110955	17309.4	-0.87936	0.129873	-6.77093	1.27956e-11	1.84831e-10	ATP5B	506	1.93814e-10	23802	20703	22776	11993	11415	13168
1406	ENSG00000142303	85.6083	2.091	0.308837	6.77057	1.28275e-11	1.8516e-10	ADAMTS10	81794	1.94159e-10	26	40	32	174	104	138
1407	ENSG00000180263	510.09	1.27179	0.187885	6.76895	1.29717e-11	1.87108e-10	FGD6	55785	1.96202e-10	323	255	319	620	868	676
1408	ENSG00000099995	1478.91	-0.978207	0.144549	-6.76731	1.31196e-11	1.89107e-10	SF3A1	10291	1.98298e-10	2012	2053	1821	1094	1012	882
1409	ENSG00000055732	45.7378	3.03178	0.448027	6.76695	1.31521e-11	1.89441e-10	MCOLN3	55283	1.98648e-10	15	10	5	55	88	102
1410	ENSG00000180694	357.502	1.24185	0.183556	6.76553	1.32824e-11	1.91182e-10	TMEM64	169200	2.00474e-10	240	216	181	459	480	569
1411	ENSG00000256525	114.178	1.73069	0.256022	6.75994	1.38049e-11	1.98561e-10	POLG2	11232	2.08212e-10	43	55	62	152	205	169
1412	ENSG00000164209	374.001	1.18787	0.175729	6.75966	1.38315e-11	1.98803e-10	SLC25A46	91137	2.08465e-10	258	216	210	461	554	545
1413	ENSG00000162191	527.573	-1.37237	0.203093	-6.75737	1.4052e-11	2.01829e-10	UBXN1	51035	2.11638e-10	662	757	865	362	299	221
1414	ENSG00000151135	408.905	1.21682	0.180114	6.75583	1.42023e-11	2.03845e-10	TMEM263	90488	2.13752e-10	254	283	200	528	610	578
1415	ENSG00000125691	6408.38	-1.07097	0.158551	-6.75475	1.43079e-11	2.05215e-10	RPL23	9349	2.15189e-10	7688	8554	9810	4376	4546	3477
1416	ENSG00000145012	1147.43	1.183	0.175156	6.754	1.43828e-11	2.06144e-10	LPP	4026	2.16163e-10	762	678	664	1250	1694	1836
1417	ENSG00000105341	996.655	-1.21283	0.179616	-6.75237	1.45446e-11	2.08316e-10	ATP5SL	55101	2.1844e-10	1400	1479	1299	757	538	507
1418	ENSG00000133318	2212.02	-0.87761	0.130026	-6.74949	1.48368e-11	2.1235e-10	RTN3	10313	2.22671e-10	2926	2654	3013	1501	1535	1641
1419	ENSG00000197451	2894.06	-0.999799	0.148151	-6.74849	1.49391e-11	2.13663e-10	HNRNPAB	3182	2.24048e-10	3933	4187	3457	2190	1793	1806
1420	ENSG00000105520	218.796	-1.33072	0.197204	-6.74795	1.49953e-11	2.14317e-10	PLPPR2	64748	2.24734e-10	329	303	308	149	111	113
1421	ENSG00000112699	655.207	-1.1502	0.170553	-6.74397	1.54116e-11	2.20112e-10	GMDS	2762	2.30809e-10	977	743	990	424	429	368
1422	ENSG00000187079	2684.58	1.05441	0.156389	6.74221	1.55991e-11	2.22633e-10	TEAD1	7003	2.33453e-10	1925	1848	1460	3269	3643	3961
1423	ENSG00000128228	311.777	-2.03948	0.302524	-6.74153	1.56725e-11	2.23411e-10	SDF2L1	23753	2.3427e-10	554	543	408	199	97	70
1424	ENSG00000160131	407.494	1.08509	0.160957	6.7415	1.56757e-11	2.23411e-10	VMA21	203547	2.3427e-10	232	274	277	566	539	556
1425	ENSG00000177463	482.099	1.23984	0.183929	6.74087	1.57442e-11	2.2423e-10	NR2C2	7182	2.35128e-10	307	298	255	572	654	807
1426	ENSG00000198356	503.023	-1.15628	0.17154	-6.74057	1.57764e-11	2.24532e-10	ASNA1	439	2.35445e-10	656	715	714	372	281	281
1427	ENSG00000100216	961.273	-1.22053	0.181095	-6.73973	1.58682e-11	2.2568e-10	TOMM22	56993	2.36649e-10	1247	1512	1278	715	535	482
1428	ENSG00000124155	936.363	-1.01864	0.151157	-6.73896	1.59529e-11	2.26725e-10	PIGT	51604	2.37745e-10	1337	1201	1223	685	540	632
1429	ENSG00000010292	1775.12	-1.17684	0.174661	-6.73786	1.60738e-11	2.28284e-10	NCAPD2	9918	2.39379e-10	2554	2815	2015	1274	969	1023
1430	ENSG00000067829	598.028	-1.23233	0.18293	-6.73662	1.62113e-11	2.30076e-10	IDH3G	3421	2.41258e-10	892	778	848	438	288	346
1431	ENSG00000198911	2453.53	-1.077	0.159901	-6.73542	1.63461e-11	2.31826e-10	SREBF2	6721	2.43094e-10	3414	3486	3088	1834	1604	1295
1432	ENSG00000071859	794.395	-1.04037	0.154563	-6.73103	1.6847e-11	2.38765e-10	FAM50A	9130	2.50369e-10	1023	1050	1134	586	519	454
1433	ENSG00000147604	9175.33	-0.887545	0.131879	-6.72999	1.69672e-11	2.403e-10	RPL7	6129	2.51979e-10	11507	11591	12638	6228	7119	5969
1434	ENSG00000132471	1066.84	-1.16316	0.172921	-6.72652	1.73774e-11	2.45938e-10	WBP2	23558	2.57891e-10	1476	1544	1406	802	642	531
1435	ENSG00000064490	120.346	-1.61308	0.239846	-6.72548	1.75019e-11	2.47527e-10	RFXANK	8625	2.59557e-10	175	175	194	71	47	60
1436	ENSG00000188986	380.062	-1.48853	0.221417	-6.72272	1.78366e-11	2.52085e-10	NELFB	25920	2.64337e-10	578	645	459	263	173	163
1437	ENSG00000136378	57.3712	2.50951	0.373299	6.72251	1.78624e-11	2.52273e-10	ADAMTS7	11173	2.64534e-10	16	22	14	109	117	66
1438	ENSG00000167778	420.306	-1.1415	0.169808	-6.72232	1.78853e-11	2.52422e-10	SPRYD3	84926	2.6469e-10	626	579	531	295	260	231
1439	ENSG00000154767	295.013	1.22145	0.181775	6.7196	1.8222e-11	2.56995e-10	XPC	7508	2.69486e-10	179	162	190	374	466	399
1440	ENSG00000135632	616.521	-0.973804	0.144951	-6.71814	1.84058e-11	2.59407e-10	SMYD5	10322	2.72015e-10	782	868	801	427	394	428
1441	ENSG00000083097	80.5242	2.00476	0.298525	6.71554	1.87377e-11	2.63792e-10	DOPEY1	23033	2.76613e-10	30	33	33	97	145	145
1442	ENSG00000070961	1607.99	1.01002	0.150403	6.71543	1.87513e-11	2.63792e-10	ATP2B1	490	2.76613e-10	1107	1044	1050	1824	2223	2400
1443	ENSG00000103540	159.268	1.64305	0.244669	6.71539	1.8756e-11	2.63792e-10	CCP110	9738	2.76613e-10	74	83	75	195	218	311
1444	ENSG00000089597	5920.69	-0.87823	0.130792	-6.71472	1.88422e-11	2.64821e-10	GANAB	23193	2.77692e-10	8449	7503	7055	4299	4000	4218
1445	ENSG00000115350	326.777	-1.07967	0.160809	-6.71398	1.89381e-11	2.65986e-10	POLE4	56655	2.78913e-10	454	452	424	208	215	207
1446	ENSG00000230629	2577.8	-0.956854	0.142569	-6.71151	1.92617e-11	2.70343e-10	RPS23P8	NA	2.83483e-10	3306	3089	3812	1616	1866	1776
1447	ENSG00000155368	1769.16	-0.902366	0.134468	-6.71063	1.9378e-11	2.71788e-10	DBI	1622	2.84998e-10	2213	2164	2539	1198	1270	1232
1448	ENSG00000171931	35.0993	4.00352	0.596697	6.70947	1.95329e-11	2.7377e-10	FBXW10	10517	2.87076e-10	3	2	7	69	93	37
1449	ENSG00000204130	134.928	1.70119	0.253584	6.70859	1.96511e-11	2.75237e-10	RUFY2	55680	2.88615e-10	72	65	53	159	216	245
1450	ENSG00000011566	282.943	1.3319	0.198565	6.70763	1.97808e-11	2.76863e-10	MAP4K3	8491	2.90319e-10	190	139	153	345	439	432
1451	ENSG00000100353	2310.3	-1.02708	0.153145	-6.70655	1.99275e-11	2.78724e-10	EIF3D	8664	2.9227e-10	2950	3064	3285	1640	1664	1259
1452	ENSG00000186395	472.15	-1.07249	0.15997	-6.70429	2.02389e-11	2.82885e-10	KRT10	3858	2.96634e-10	607	594	720	304	291	317
1453	ENSG00000144747	311.347	1.40843	0.210099	6.70362	2.03313e-11	2.8398e-10	TMF1	7110	2.97782e-10	195	146	170	352	482	524
1454	ENSG00000071537	1084.06	0.97914	0.146107	6.70152	2.0626e-11	2.87898e-10	SEL1L	6400	3.01891e-10	783	726	679	1346	1594	1375
1455	ENSG00000224051	186.818	-1.69219	0.252516	-6.70133	2.06535e-11	2.88084e-10	CPTP	80772	3.02085e-10	293	319	245	120	84	61
1456	ENSG00000101363	871.278	-1.06297	0.158665	-6.69948	2.09164e-11	2.91551e-10	MANBAL	63905	3.05721e-10	1055	1177	1304	639	520	533
1457	ENSG00000138434	1115.62	1.12263	0.16766	6.69589	2.1437e-11	2.98602e-10	SSFA2	6744	3.13115e-10	756	724	626	1274	1549	1765
1458	ENSG00000132793	121.302	1.52166	0.22726	6.69567	2.1468e-11	2.98829e-10	LPIN3	64900	3.13353e-10	59	67	62	191	172	177
1459	ENSG00000111481	2800.41	-0.843977	0.126059	-6.69512	2.15501e-11	2.99766e-10	COPZ1	22818	3.14335e-10	3717	3464	3610	1870	2045	2097
1460	ENSG00000083857	5472.9	1.10007	0.164341	6.6938	2.17453e-11	3.02275e-10	FAT1	2195	3.16966e-10	3850	3697	2898	6324	8194	7874
1461	ENSG00000071967	347.401	1.27059	0.189834	6.69319	2.1836e-11	3.03327e-10	CYBRD1	79901	3.18069e-10	215	186	210	438	592	444
1462	ENSG00000141030	1102.96	-0.886984	0.132536	-6.69242	2.1951e-11	3.04716e-10	COPS3	8533	3.19526e-10	1341	1453	1501	782	776	765
1463	ENSG00000196976	284.812	-1.93247	0.288768	-6.69213	2.19942e-11	3.05107e-10	LAGE3	8270	3.19936e-10	413	513	429	186	69	99
1464	ENSG00000143669	70.4524	2.20423	0.32944	6.69083	2.21903e-11	3.07618e-10	LYST	1130	3.22569e-10	22	19	34	93	114	141
1465	ENSG00000146830	204.458	1.45548	0.217543	6.69054	2.2235e-11	3.08027e-10	GIGYF1	64599	3.22998e-10	102	128	98	347	247	304
1466	ENSG00000197601	607.828	1.199	0.17923	6.68975	2.23549e-11	3.09476e-10	FAR1	84188	3.24517e-10	368	418	320	711	860	969
1467	ENSG00000112667	270.885	-1.54128	0.230411	-6.68929	2.24258e-11	3.10246e-10	DNPH1	10591	3.25325e-10	415	410	385	189	99	128
1468	ENSG00000183684	670.998	-1.69326	0.253215	-6.68705	2.27712e-11	3.1481e-10	ALYREF	10189	3.30111e-10	962	1163	951	480	248	222
1469	ENSG00000119986	1013.77	-1.13014	0.16901	-6.68684	2.28045e-11	3.15056e-10	AVPI1	60370	3.30368e-10	1327	1412	1437	778	585	543
1470	ENSG00000110200	114.307	-1.55027	0.231853	-6.68644	2.28672e-11	3.15708e-10	ANAPC15	25906	3.31052e-10	162	188	161	64	56	54
1471	ENSG00000100219	3030.87	-1.17916	0.176359	-6.68612	2.29164e-11	3.16171e-10	XBP1	7494	3.31538e-10	4119	3330	5165	1749	2041	1781
1472	ENSG00000167280	120.088	1.78528	0.267032	6.68563	2.29932e-11	3.17015e-10	ENGASE	64772	3.32423e-10	63	62	37	220	164	175
1473	ENSG00000167862	491.867	-1.16719	0.174603	-6.68482	2.31207e-11	3.18557e-10	MRPL58	3396	3.3404e-10	608	736	698	357	273	279
1474	ENSG00000118873	486.953	1.10493	0.165301	6.68431	2.32015e-11	3.19454e-10	RAB3GAP2	25782	3.3498e-10	346	298	282	598	690	707
1475	ENSG00000173226	161.707	1.804	0.269905	6.68385	2.3274e-11	3.20234e-10	IQCB1	9657	3.35798e-10	54	56	107	218	259	277
1476	ENSG00000134574	643.012	0.986171	0.14759	6.68184	2.3596e-11	3.24444e-10	DDB2	1643	3.40213e-10	397	465	433	873	879	812
1477	ENSG00000120053	1623.34	-0.891697	0.133492	-6.67976	2.39334e-11	3.28861e-10	GOT1	2805	3.44844e-10	2181	1969	2178	1105	1086	1220
1478	ENSG00000104218	147.103	1.72943	0.25891	6.67965	2.39514e-11	3.28887e-10	CSPP1	79848	3.44871e-10	66	82	56	175	221	283
1479	ENSG00000122406	6487.7	-0.894688	0.133957	-6.67893	2.40688e-11	3.30274e-10	RPL5	6125	3.46327e-10	7827	8323	9162	4320	4951	4343
1480	ENSG00000129315	458.715	1.25247	0.187531	6.67873	2.41015e-11	3.305e-10	CCNT1	904	3.46563e-10	258	225	331	572	665	701
1481	ENSG00000158716	209.732	-1.3837	0.207227	-6.6772	2.4355e-11	3.33751e-10	DUSP23	54935	3.49972e-10	258	344	308	135	108	106
1482	ENSG00000268621	112.972	2.09508	0.313944	6.67342	2.49918e-11	3.42246e-10	AC006262.5	NA	3.5888e-10	32	41	56	170	251	128
1483	ENSG00000185813	438.051	-1.54844	0.232146	-6.67008	2.55658e-11	3.4987e-10	PCYT2	5833	3.66874e-10	676	740	543	282	240	147
1484	ENSG00000167674	351.424	-1.21703	0.182486	-6.6692	2.57195e-11	3.51737e-10	CTB-50L17.10	84717	3.68832e-10	482	492	500	252	176	206
1485	ENSG00000047410	1719.44	1.06387	0.159533	6.66863	2.58202e-11	3.52876e-10	TPR	7175	3.70027e-10	1148	1150	1040	1900	2496	2582
1486	ENSG00000213585	5866.58	-0.792836	0.118915	-6.66722	2.60693e-11	3.56041e-10	VDAC1	7416	3.73345e-10	7653	7143	7522	4423	4314	4144
1487	ENSG00000099330	96.6432	-1.78326	0.267484	-6.66679	2.61464e-11	3.56854e-10	OCEL1	79629	3.74198e-10	141	146	162	56	34	40
1488	ENSG00000180530	731.271	1.19141	0.178782	6.66407	2.66348e-11	3.63275e-10	NRIP1	8204	3.80931e-10	432	430	474	797	1169	1085
1489	ENSG00000104980	409.237	-1.4144	0.212271	-6.66319	2.67946e-11	3.65209e-10	TIMM44	10469	3.82959e-10	535	549	702	289	200	180
1490	ENSG00000105011	252.139	-1.60146	0.240364	-6.66265	2.68934e-11	3.6631e-10	ASF1B	55723	3.84114e-10	385	484	269	148	118	108
1491	ENSG00000101333	357.451	1.33759	0.200807	6.66109	2.71798e-11	3.69963e-10	PLCB4	5332	3.87944e-10	222	208	178	424	629	484
1492	ENSG00000037749	228.409	1.3734	0.20624	6.65921	2.75298e-11	3.74475e-10	MFAP3	4238	3.92675e-10	155	124	102	309	356	324
1493	ENSG00000084754	3613.55	-0.943956	0.14177	-6.65836	2.76905e-11	3.76409e-10	HADHA	3030	3.94704e-10	4929	4245	5092	2349	2735	2332
1494	ENSG00000153707	366.327	1.68697	0.253409	6.6571	2.79274e-11	3.79375e-10	PTPRD	5789	3.97814e-10	190	190	141	414	466	798
1495	ENSG00000172216	860.031	-1.76007	0.264532	-6.65351	2.86183e-11	3.885e-10	CEBPB	1051	4.07382e-10	1079	1199	1707	588	289	299
1496	ENSG00000184752	778.974	-0.94025	0.141337	-6.65252	2.88115e-11	3.90863e-10	NDUFA12	55967	4.09859e-10	1032	956	1085	512	529	560
1497	ENSG00000120437	763.066	-1.08926	0.163739	-6.65239	2.88371e-11	3.90948e-10	ACAT2	39	4.09949e-10	1169	1049	896	544	456	463
1498	ENSG00000127922	1035.56	-1.0282	0.154626	-6.64959	2.9392e-11	3.98204e-10	SHFM1	100506136	4.17558e-10	1287	1265	1617	646	711	687
1499	ENSG00000071655	357.186	-1.51899	0.228448	-6.64917	2.94741e-11	3.98856e-10	MBD3	53615	4.18242e-10	552	555	482	257	139	157
1500	ENSG00000005020	611.056	1.14391	0.172038	6.64915	2.94794e-11	3.98856e-10	SKAP2	8935	4.18242e-10	343	400	399	700	943	881
1501	ENSG00000204469	1911.8	-1.20122	0.180663	-6.64893	2.95227e-11	3.99176e-10	PRRC2A	7916	4.18577e-10	2895	2862	2237	1429	1044	1003
1502	ENSG00000177888	226.434	1.42922	0.214973	6.64835	2.96391e-11	4.00483e-10	ZBTB41	360023	4.19948e-10	146	111	110	283	317	392
1503	ENSG00000151414	229.883	1.32813	0.199823	6.64653	3.00078e-11	4.05195e-10	NEK7	140609	4.24888e-10	139	128	126	275	336	375
1504	ENSG00000196453	233.88	-1.51819	0.228499	-6.64416	3.04953e-11	4.11503e-10	ZNF777	27153	4.31503e-10	342	369	330	165	101	97
1505	ENSG00000274471	30.9096	4.135	0.622371	6.64395	3.05386e-11	4.11815e-10	RP11-228M15.1	NA	4.3183e-10	5	5	0	41	65	70
1506	ENSG00000161642	194.513	-1.30874	0.19705	-6.64169	3.10107e-11	4.17903e-10	ZNF385A	25946	4.38214e-10	271	271	290	123	117	95
1507	ENSG00000154518	2503.77	-0.95582	0.143916	-6.6415	3.1051e-11	4.18168e-10	ATP5G3	518	4.38492e-10	3497	3191	3224	1870	1469	1771
1508	ENSG00000139194	29.3726	4.42681	0.667073	6.63618	3.21925e-11	4.33254e-10	RBP5	83758	4.54312e-10	3	1	4	47	46	75
1509	ENSG00000227500	460.479	-1.35608	0.204376	-6.63523	3.23994e-11	4.35749e-10	SCAMP4	113178	4.56928e-10	678	709	600	340	223	212
1510	ENSG00000106605	559.618	-1.12548	0.169636	-6.63464	3.25287e-11	4.37198e-10	BLVRA	644	4.58447e-10	781	703	818	370	292	393
1511	ENSG00000146166	464.652	1.55009	0.233654	6.63414	3.26406e-11	4.38412e-10	LGSN	51557	4.5972e-10	247	175	288	571	599	908
1512	ENSG00000110057	1056.02	-1.49534	0.225452	-6.63262	3.29773e-11	4.42642e-10	UNC93B1	81622	4.64155e-10	1507	1528	1643	789	476	393
1513	ENSG00000005810	508.506	1.36311	0.205622	6.62921	3.3749e-11	4.52701e-10	MYCBP2	23077	4.74703e-10	322	290	242	560	741	896
1514	ENSG00000131437	173.355	1.41247	0.213093	6.62841	3.39324e-11	4.54859e-10	KIF3A	11127	4.76967e-10	95	94	95	215	250	291
1515	ENSG00000087586	1450.18	-0.995405	0.150179	-6.62812	3.39985e-11	4.55234e-10	AURKA	6790	4.77359e-10	2076	2076	1643	1020	918	969
1516	ENSG00000134690	299.079	-1.25481	0.189316	-6.62809	3.40052e-11	4.55234e-10	CDCA8	55143	4.77359e-10	401	492	371	186	155	188
1517	ENSG00000222009	38.4534	2.91012	0.439305	6.62436	3.48751e-11	4.66573e-10	BTBD19	149478	4.89249e-10	5	8	14	65	64	74
1518	ENSG00000114978	1042.63	0.945737	0.142814	6.62218	3.53948e-11	4.73213e-10	MOB1A	55233	4.96213e-10	738	747	653	1259	1424	1435
1519	ENSG00000171960	164.336	-1.37991	0.208465	-6.61939	3.60684e-11	4.81649e-10	PPIH	10465	5.05058e-10	212	236	264	84	89	100
1520	ENSG00000117620	90.3368	1.78756	0.27005	6.61937	3.60732e-11	4.81649e-10	SLC35A3	23443	5.05058e-10	40	48	33	122	151	147
1521	ENSG00000125520	608.209	-1.81366	0.274011	-6.61893	3.6181e-11	4.8277e-10	SLC2A4RG	56731	5.06234e-10	972	1078	792	425	199	184
1522	ENSG00000088247	1454.53	-1.35842	0.205244	-6.61855	3.6275e-11	4.83706e-10	KHSRP	100500888	5.07215e-10	2032	2459	1788	1070	738	641
1523	ENSG00000066422	305.578	1.25562	0.189845	6.61391	3.74303e-11	4.98783e-10	ZBTB11	27107	5.23026e-10	186	161	194	360	476	457
1524	ENSG00000127952	352.47	-1.08142	0.163533	-6.6129	3.76867e-11	5.01871e-10	STYXL1	51657	5.26263e-10	438	482	517	227	231	220
1525	ENSG00000186088	111.602	1.67027	0.252732	6.60886	3.87292e-11	5.15416e-10	GSAP	54103	5.40467e-10	53	50	57	141	167	201
1526	ENSG00000161509	30.931	3.32662	0.503452	6.60763	3.90524e-11	5.19377e-10	GRIN2C	2905	5.44619e-10	4	7	6	56	60	52
1527	ENSG00000126067	1406.8	-0.868054	0.131386	-6.60688	3.92513e-11	5.21679e-10	PSMB2	5690	5.47034e-10	1841	1858	1754	1067	948	973
1528	ENSG00000177732	631.494	-1.4382	0.217705	-6.6062	3.9432e-11	5.23738e-10	SOX12	6666	5.49193e-10	874	1005	889	473	274	274
1529	ENSG00000116586	335.212	-1.1018	0.166831	-6.60426	3.99496e-11	5.30267e-10	LAMTOR2	28956	5.56039e-10	456	445	471	237	203	199
1530	ENSG00000265354	1242.1	-0.870566	0.131825	-6.60394	4.00362e-11	5.31068e-10	TIMM23	100287932	5.56879e-10	1605	1507	1706	869	873	894
1531	ENSG00000105329	367.149	-1.60914	0.243691	-6.60321	4.02339e-11	5.33342e-10	TGFB1	7040	5.59264e-10	430	717	512	228	184	131
1532	ENSG00000156531	309.469	1.14758	0.173817	6.60224	4.04994e-11	5.36512e-10	PHF6	84295	5.62587e-10	211	180	186	396	461	422
1533	ENSG00000278133	51.1852	2.3115	0.350119	6.60203	4.05572e-11	5.36926e-10	RP11-196G11.5	NA	5.63022e-10	17	16	19	79	99	78
1534	ENSG00000172766	117.653	1.50969	0.228728	6.60039	4.10077e-11	5.42537e-10	NAA16	79612	5.68906e-10	60	62	62	162	177	183
1535	ENSG00000136152	192.88	1.32982	0.201567	6.59741	4.18396e-11	5.53183e-10	COG3	83548	5.80069e-10	114	113	102	247	270	312
1536	ENSG00000116741	452.826	1.28016	0.194074	6.59623	4.2174e-11	5.57241e-10	RGS2	5997	5.84324e-10	213	260	320	549	676	699
1537	ENSG00000032389	374.84	-1.04259	0.158082	-6.59522	4.24614e-11	5.60673e-10	TSSC1	7260	5.87923e-10	509	505	500	259	250	226
1538	ENSG00000172301	494.058	-0.997478	0.15126	-6.59447	4.26778e-11	5.63164e-10	COPRS	55352	5.90535e-10	627	664	684	318	317	355
1539	ENSG00000101945	263.47	-1.64475	0.249439	-6.59379	4.2874e-11	5.65385e-10	SUV39H1	6839	5.92865e-10	448	480	270	160	114	109
1540	ENSG00000157796	75.5633	2.14941	0.326067	6.59192	4.34178e-11	5.71978e-10	WDR19	57728	5.99777e-10	20	33	31	92	125	153
1541	ENSG00000189403	2759.47	-0.911072	0.138211	-6.59188	4.34303e-11	5.71978e-10	HMGB1	3146	5.99777e-10	3549	3820	3440	2113	1716	1919
1542	ENSG00000109184	178.266	1.33384	0.202358	6.59149	4.35447e-11	5.73113e-10	DCUN1D4	23142	6.00967e-10	90	112	102	256	272	238
1543	ENSG00000188549	117.347	2.13793	0.324543	6.58749	4.47317e-11	5.88354e-10	C15orf52	388115	6.16949e-10	34	53	44	190	267	116
1544	ENSG00000159685	86.2925	-1.85123	0.281058	-6.58666	4.49821e-11	5.91264e-10	CHCHD6	84303	6.20001e-10	118	140	147	48	28	36
1545	ENSG00000128309	869.983	-1.20338	0.182795	-6.58322	4.60352e-11	6.04715e-10	MPST	4357	6.34106e-10	1147	1337	1156	663	466	450
1546	ENSG00000100908	205.459	-1.57648	0.239583	-6.58011	4.70102e-11	6.17122e-10	EMC9	51016	6.47116e-10	297	344	283	141	80	87
1547	ENSG00000102978	1572.83	-0.907789	0.137966	-6.57981	4.71051e-11	6.17969e-10	POLR2C	5432	6.48004e-10	1966	2090	2099	1016	1049	1216
1548	ENSG00000184924	194.21	-1.34966	0.205134	-6.57942	4.72281e-11	6.19182e-10	PTRHD1	391356	6.49276e-10	268	240	330	108	107	114
1549	ENSG00000079805	1044.71	-0.955201	0.145221	-6.57759	4.7813e-11	6.26446e-10	DNM2	1785	6.56893e-10	1296	1394	1446	795	666	671
1550	ENSG00000180488	158.564	1.42526	0.216744	6.5758	4.8392e-11	6.33622e-10	MIGA1	374986	6.64418e-10	87	88	83	204	267	222
1551	ENSG00000052749	892.369	-0.969255	0.147437	-6.57403	4.89698e-11	6.40775e-10	RRP12	23223	6.71918e-10	1152	1212	1180	684	564	562
1552	ENSG00000139112	708.05	1.47835	0.224935	6.57235	4.95276e-11	6.47657e-10	GABARAPL1	23710	6.79134e-10	369	311	442	813	900	1413
1553	ENSG00000127838	547.159	-1.11326	0.169428	-6.57072	5.00719e-11	6.54353e-10	PNKD	25953	6.86156e-10	726	779	741	408	337	292
1554	ENSG00000099834	339.883	-1.42384	0.216714	-6.57015	5.02658e-11	6.56464e-10	CDHR5	53841	6.8837e-10	614	426	446	229	155	169
1555	ENSG00000116096	816.749	-0.989232	0.15071	-6.5638	5.2455e-11	6.84613e-10	SPR	6697	7.17887e-10	1119	1080	1060	587	582	472
1556	ENSG00000139697	733.234	1.02549	0.15626	6.56275	5.28253e-11	6.89003e-10	SBNO1	102466877	7.2249e-10	517	518	414	917	1017	1017
1557	ENSG00000228526	34.5178	5.91782	0.901745	6.56263	5.28656e-11	6.89086e-10	MIR34A	106614088	7.22578e-10	0	1	2	66	56	82
1558	ENSG00000166979	917.617	-1.12128	0.170911	-6.56062	5.35854e-11	6.97853e-10	EVA1C	59271	7.3177e-10	1246	1153	1373	581	474	679
1559	ENSG00000100815	494.092	1.27166	0.193834	6.56056	5.36069e-11	6.97853e-10	TRIP11	9321	7.3177e-10	336	234	298	577	731	789
1560	ENSG00000171150	366.088	1.14673	0.174875	6.55744	5.47381e-11	7.12122e-10	SOCS5	9655	7.46733e-10	261	201	220	495	475	544
1561	ENSG00000184428	319.228	-1.25095	0.190799	-6.55639	5.5126e-11	7.16709e-10	TOP1MT	116447	7.51543e-10	414	436	499	223	156	188
1562	ENSG00000101974	225.588	1.33232	0.203242	6.55531	5.55251e-11	7.21436e-10	ATP11C	286410	7.56499e-10	139	124	121	266	364	339
1563	ENSG00000093009	249.876	-1.45026	0.221306	-6.55319	5.63191e-11	7.31284e-10	CDC45	8318	7.66826e-10	354	441	303	166	116	119
1564	ENSG00000214274	160.742	-1.86536	0.284683	-6.55243	5.66093e-11	7.34582e-10	ANG	283	7.70285e-10	232	174	351	72	53	83
1565	ENSG00000175550	441.401	-1.58668	0.242192	-6.55135	5.70195e-11	7.39432e-10	DRAP1	10589	7.7537e-10	631	725	632	323	177	161
1566	ENSG00000248334	37.8583	2.76189	0.421629	6.55053	5.73348e-11	7.43046e-10	WHAMMP2	NA	7.7916e-10	8	8	13	66	62	70
1567	ENSG00000172428	348.977	-1.16803	0.178378	-6.54804	5.82982e-11	7.55049e-10	COPS9	150678	7.91746e-10	468	492	490	254	206	185
1568	ENSG00000152242	209.396	1.24067	0.189492	6.54733	5.85763e-11	7.58167e-10	C18orf25	147339	7.95016e-10	136	114	123	292	311	280
1569	ENSG00000121552	265.1	-2.01874	0.308352	-6.54687	5.87541e-11	7.59984e-10	CSTA	1475	7.96921e-10	340	329	607	98	154	63
1570	ENSG00000230124	618.393	-0.936232	0.143011	-6.54659	5.88656e-11	7.60941e-10	ACBD6	100527964	7.97925e-10	772	812	854	433	409	432
1571	ENSG00000162591	62.9812	2.32849	0.355797	6.54444	5.97198e-11	7.70862e-10	MEGF6	1953	8.08328e-10	18	25	20	140	76	99
1572	ENSG00000106258	155.988	2.26514	0.34612	6.54439	5.97397e-11	7.70862e-10	CYP3A5	1577	8.08328e-10	59	30	72	146	274	354
1573	ENSG00000177700	2351.13	-1.56239	0.238739	-6.54437	5.9747e-11	7.70862e-10	POLR2L	5441	8.08328e-10	3744	3765	3030	1762	944	861
1574	ENSG00000225200	89.3726	-1.65443	0.252834	-6.54355	6.00743e-11	7.74592e-10	AB019441.29	NA	8.12239e-10	124	142	141	47	41	41
1575	ENSG00000243199	630.819	-1.0133	0.154889	-6.54209	6.06633e-11	7.81689e-10	RP11-408P14.1	NA	8.19681e-10	808	921	801	375	450	429
1576	ENSG00000110700	5360	-0.891346	0.136254	-6.54181	6.07787e-11	7.8268e-10	RPS13	6207	8.2072e-10	6563	6527	7805	3577	3996	3691
1577	ENSG00000019505	2042.61	-1.25346	0.191774	-6.53612	6.31343e-11	8.12499e-10	SYT13	57586	8.51988e-10	3277	2301	3056	932	1368	1322
1578	ENSG00000188419	179.894	1.43594	0.219717	6.53542	6.3432e-11	8.15813e-10	CHM	1121	8.55464e-10	106	86	100	214	297	277
1579	ENSG00000146707	242.949	-1.16727	0.178673	-6.53301	6.44594e-11	8.28502e-10	POMZP3	22932	8.68769e-10	348	323	338	150	137	163
1580	ENSG00000227615	160.26	-1.4612	0.223686	-6.53236	6.47401e-11	8.31583e-10	RP11-864N7.2	NA	8.72e-10	216	282	207	79	80	97
1581	ENSG00000105523	64.5182	-2.28075	0.349213	-6.53112	6.52784e-11	8.37967e-10	FAM83E	54854	8.78694e-10	93	83	145	30	19	17
1582	ENSG00000160336	113.783	1.69366	0.259343	6.53057	6.55201e-11	8.40369e-10	ZNF761	388561	8.81213e-10	55	42	64	146	201	175
1583	ENSG00000177697	2702.61	-1.35135	0.206929	-6.5305	6.55484e-11	8.40369e-10	CD151	977	8.81213e-10	4046	4050	3555	2089	1324	1152
1584	ENSG00000080823	167.536	1.43635	0.219992	6.52909	6.61722e-11	8.47831e-10	MOK	5891	8.89038e-10	78	114	79	242	251	240
1585	ENSG00000105248	162.517	-1.75173	0.268341	-6.52799	6.66603e-11	8.53156e-10	CCDC94	55702	8.94622e-10	228	274	250	109	55	59
1586	ENSG00000184887	356.947	-1.20735	0.18495	-6.52796	6.66719e-11	8.53156e-10	BTBD6	90135	8.94622e-10	528	545	422	248	200	199
1587	ENSG00000161677	175.421	-2.19063	0.335627	-6.52698	6.71089e-11	8.58208e-10	JOSD2	126119	8.99919e-10	287	330	247	109	34	45
1588	ENSG00000185043	994.874	-0.884386	0.135502	-6.52672	6.72267e-11	8.59173e-10	CIB1	10519	9.00931e-10	1329	1228	1315	743	676	678
1589	ENSG00000160256	252.715	-1.42744	0.218758	-6.52519	6.79173e-11	8.67452e-10	FAM207A	85395	9.09612e-10	351	402	353	179	106	126
1590	ENSG00000172590	449.833	-1.2598	0.193072	-6.52503	6.79885e-11	8.67815e-10	MRPL52	122704	9.09993e-10	608	690	607	336	221	238
1591	ENSG00000167088	729.348	-0.982731	0.150632	-6.52404	6.84363e-11	8.72982e-10	SNRPD1	6632	9.15411e-10	908	933	1066	531	457	482
1592	ENSG00000087338	280.472	1.36715	0.20965	6.52108	6.98045e-11	8.89876e-10	GMCL1	64395	9.33126e-10	185	146	139	363	356	494
1593	ENSG00000183688	327.727	-1.49387	0.229126	-6.51983	7.03859e-11	8.96725e-10	FAM101B	359845	9.40308e-10	444	559	448	227	122	166
1594	ENSG00000186716	549.634	-1.28415	0.19698	-6.51918	7.06912e-11	9.00049e-10	BCR	613	9.43794e-10	854	765	720	388	335	236
1595	ENSG00000238105	31.053	3.97245	0.60947	6.51787	7.13129e-11	9.07395e-10	GOLGA2P5	55592	9.51497e-10	5	1	5	43	48	85
1596	ENSG00000162378	284.999	1.36435	0.209413	6.5151	7.26428e-11	9.23738e-10	ZYG11B	79699	9.68634e-10	183	154	141	324	426	482
1597	ENSG00000175634	450.924	-1.31534	0.201919	-6.51418	7.30858e-11	9.2879e-10	RPS6KB2	6199	9.73931e-10	697	669	564	328	244	203
1598	ENSG00000178307	320.037	-1.16354	0.178632	-6.51361	7.33682e-11	9.31795e-10	TMEM11	8834	9.77082e-10	408	484	436	226	186	180
1599	ENSG00000167553	5929.34	-1.26511	0.194233	-6.51335	7.34921e-11	9.32784e-10	TUBA1C	84790	9.7812e-10	9060	9831	6232	4178	3057	3217
1600	ENSG00000004468	139.076	1.96889	0.302327	6.51244	7.39417e-11	9.37905e-10	CD38	952	9.83489e-10	60	51	58	180	156	329
1601	ENSG00000119547	153	1.76884	0.271631	6.51193	7.41919e-11	9.40135e-10	ONECUT2	9480	9.85828e-10	72	54	83	163	268	279
1602	ENSG00000137449	250.48	1.60233	0.246062	6.51189	7.42102e-11	9.40135e-10	CPEB2	132864	9.85828e-10	144	123	104	312	306	513
1603	ENSG00000128463	972.054	-0.862968	0.132527	-6.51166	7.43271e-11	9.41028e-10	EMC4	51234	9.86764e-10	1211	1252	1300	711	670	688
1604	ENSG00000116984	304.363	1.37395	0.211034	6.51059	7.48546e-11	9.47116e-10	MTR	4548	9.93149e-10	162	210	136	381	423	514
1605	ENSG00000135930	726.441	-0.902705	0.138683	-6.50913	7.55873e-11	9.55791e-10	EIF4E2	9470	1.00224e-09	990	910	940	502	525	492
1606	ENSG00000125843	242.676	-1.28719	0.197779	-6.50822	7.60453e-11	9.60984e-10	AP5S1	55317	1.00769e-09	354	373	306	160	116	146
1607	ENSG00000182872	590.361	-1.26319	0.194123	-6.50718	7.65751e-11	9.67076e-10	RBM10	8241	1.01408e-09	791	830	880	449	312	279
1608	ENSG00000177076	48.5877	2.42648	0.373059	6.50427	7.80738e-11	9.8539e-10	ACER2	340485	1.03328e-09	17	17	12	66	98	82
1609	ENSG00000198832	114.429	-1.96495	0.302149	-6.50324	7.86101e-11	9.91542e-10	SELM	140606	1.03973e-09	179	184	184	65	50	24
1610	ENSG00000170608	75.0965	-1.82264	0.280285	-6.50282	7.88304e-11	9.93704e-10	FOXA3	3171	1.042e-09	134	108	109	38	32	29
1611	ENSG00000006432	353.4	1.33983	0.206066	6.50196	7.92803e-11	9.98755e-10	MAP3K9	4293	1.0473e-09	230	226	143	457	540	523
1612	ENSG00000179403	159.511	-2.09471	0.322313	-6.49899	8.08614e-11	1.01804e-09	VWA1	64856	1.06752e-09	275	257	244	103	35	43
1613	ENSG00000166734	486.451	1.12571	0.173267	6.49695	8.19673e-11	1.03132e-09	CASC4	113201	1.08145e-09	306	330	281	565	685	752
1614	ENSG00000198830	2137.61	-1.04032	0.160161	-6.49546	8.27787e-11	1.04089e-09	HMGN2	3151	1.09148e-09	2815	3255	2559	1504	1182	1510
1615	ENSG00000157764	187.914	1.39482	0.214804	6.49348	8.38751e-11	1.05402e-09	BRAF	673	1.10525e-09	100	88	123	236	288	293
1616	ENSG00000131408	636.428	-1.33445	0.205514	-6.49323	8.40148e-11	1.05512e-09	NR1H2	7376	1.10641e-09	927	873	934	486	316	281
1617	ENSG00000203867	154.048	1.48237	0.228352	6.49161	8.49238e-11	1.06588e-09	RBM20	282996	1.11768e-09	70	92	82	196	221	264
1618	ENSG00000272645	36.3103	2.98337	0.459658	6.49041	8.56013e-11	1.07372e-09	GTF2IP20	NA	1.1259e-09	11	6	7	56	56	81
1619	ENSG00000123416	3885.52	-1.47839	0.227816	-6.48942	8.61651e-11	1.08012e-09	TUBA1B	10376	1.13262e-09	6491	6866	3799	2605	1745	1807
1620	ENSG00000082515	390.85	-1.09301	0.168466	-6.48805	8.69537e-11	1.08934e-09	MRPL22	29093	1.14228e-09	497	503	596	242	234	273
1621	ENSG00000261115	335.66	1.74233	0.268563	6.4876	8.72152e-11	1.09194e-09	TMEM178B	100507421	1.14501e-09	180	146	136	390	390	771
1622	ENSG00000177370	339.865	-1.19464	0.184152	-6.48724	8.74219e-11	1.09385e-09	TIMM22	29928	1.14702e-09	441	541	437	221	223	176
1623	ENSG00000110628	346.906	-1.33276	0.205529	-6.48454	8.90049e-11	1.11297e-09	SLC22A18	5002	1.16707e-09	531	460	499	255	157	179
1624	ENSG00000173064	449.032	1.31642	0.203086	6.48209	9.04579e-11	1.13045e-09	HECTD4	102465519	1.18539e-09	283	288	200	538	620	765
1625	ENSG00000118412	160.673	1.65101	0.254819	6.47916	9.22331e-11	1.15192e-09	CASP8AP2	9994	1.20791e-09	74	87	72	199	206	325
1626	ENSG00000112763	172.932	1.30592	0.201567	6.47885	9.24224e-11	1.15357e-09	BTN2A1	11120	1.20964e-09	98	99	102	223	249	267
1627	ENSG00000181634	39.3016	3.51735	0.542995	6.47768	9.31429e-11	1.1616e-09	TNFSF15	9966	1.21806e-09	8	3	7	40	114	63
1628	ENSG00000082512	153.072	1.3506	0.208502	6.47762	9.318e-11	1.1616e-09	TRAF5	7188	1.21806e-09	80	94	85	214	233	212
1629	ENSG00000114956	398.995	-1.11119	0.17171	-6.47133	9.71415e-11	1.21019e-09	DGUOK	1716	1.26901e-09	488	569	581	285	243	229
1630	ENSG00000204116	101.933	1.72116	0.265971	6.47125	9.7197e-11	1.21019e-09	CHIC1	53344	1.26901e-09	59	35	47	141	156	173
1631	ENSG00000106330	88.4642	-1.79067	0.276765	-6.46997	9.80198e-11	1.21969e-09	MOSPD3	64598	1.27897e-09	147	146	119	51	34	33
1632	ENSG00000100804	1831.71	-0.963562	0.148957	-6.46875	9.88173e-11	1.22886e-09	PSMB5	5693	1.28858e-09	2483	2480	2302	1437	1192	1096
1633	ENSG00000256167	196.153	-1.68279	0.260151	-6.46851	9.89741e-11	1.23006e-09	ATF4P4	NA	1.28984e-09	252	253	392	117	94	67
1634	ENSG00000135617	196.951	-1.32674	0.205152	-6.46711	9.9896e-11	1.24075e-09	PRADC1	84279	1.30106e-09	300	283	262	128	91	118
1635	ENSG00000091127	285.655	1.27424	0.197062	6.46617	1.00517e-10	1.2477e-09	PUS7	54517	1.30834e-09	166	193	142	367	469	376
1636	ENSG00000163159	388.208	-1.08818	0.168412	-6.46145	1.03704e-10	1.28648e-09	VPS72	6944	1.34901e-09	467	529	589	262	247	235
1637	ENSG00000184949	26.8785	8.02646	1.24233	6.46082	1.04136e-10	1.29105e-09	FAM227A	646851	1.3538e-09	0	0	0	40	61	61
1638	ENSG00000112977	1663.21	-0.924252	0.143106	-6.45851	1.05742e-10	1.31016e-09	DAP	1611	1.37383e-09	2319	2063	2153	1118	1287	1040
1639	ENSG00000112640	382.283	-1.06589	0.165079	-6.45682	1.06926e-10	1.32401e-09	PPP2R5D	5528	1.38836e-09	548	550	454	246	253	243
1640	ENSG00000163993	2740.43	-1.38388	0.214459	-6.45287	1.0975e-10	1.35816e-09	S100P	6286	1.42417e-09	3662	3260	4966	1356	1204	1995
1641	ENSG00000162545	1441.36	-1.21086	0.187701	-6.45101	1.11108e-10	1.37413e-09	CAMK2N1	55450	1.44091e-09	1991	1822	2226	903	651	1055
1642	ENSG00000113597	160.803	1.43098	0.222138	6.44186	1.18019e-10	1.45805e-09	TRAPPC13	80006	1.52892e-09	82	91	88	192	246	266
1643	ENSG00000013810	848.03	-1.2264	0.190381	-6.44183	1.18038e-10	1.45805e-09	TACC3	10460	1.52892e-09	1180	1408	977	615	454	453
1644	ENSG00000108799	124.916	1.49878	0.232671	6.44164	1.18186e-10	1.45899e-09	EZH1	2145	1.5299e-09	64	61	71	186	161	206
1645	ENSG00000136603	396.397	1.14862	0.17832	6.44133	1.1843e-10	1.46112e-09	SKIL	6498	1.53214e-09	249	232	258	485	511	644
1646	ENSG00000242372	1154.53	-1.44692	0.224653	-6.44071	1.18916e-10	1.46622e-09	EIF6	3692	1.53748e-09	1722	1851	1496	824	631	404
1647	ENSG00000127483	1856.54	0.985175	0.152972	6.44024	1.19286e-10	1.46989e-09	HP1BP3	50809	1.54133e-09	1267	1271	1201	2182	2315	2904
1648	ENSG00000122034	1289.62	-0.954634	0.148294	-6.43746	1.21491e-10	1.49616e-09	GTF3A	2971	1.56888e-09	1642	1569	1893	788	919	927
1649	ENSG00000145908	97.6921	1.75315	0.272341	6.43733	1.21592e-10	1.49648e-09	ZNF300	91975	1.56922e-09	34	45	56	132	146	173
1650	ENSG00000117632	1536.73	-0.874453	0.135867	-6.43608	1.22597e-10	1.50794e-09	STMN1	100500808	1.58123e-09	2052	1892	2022	1127	982	1146
1651	ENSG00000113583	395.892	1.0128	0.15737	6.43578	1.22839e-10	1.51e-09	C5orf15	56951	1.58339e-09	275	252	260	500	538	550
1652	ENSG00000159210	525.549	-1.12216	0.174387	-6.43486	1.23587e-10	1.51828e-09	SNF8	11267	1.59208e-09	699	765	697	400	293	299
1653	ENSG00000063241	523.446	-1.33348	0.207304	-6.43248	1.25536e-10	1.54129e-09	ISOC2	79763	1.6162e-09	710	846	693	394	251	246
1654	ENSG00000142208	1165.66	-1.17092	0.182159	-6.42803	1.29269e-10	1.58616e-09	AKT1	207	1.66325e-09	1678	1705	1460	909	609	633
1655	ENSG00000156162	179.813	1.44898	0.225521	6.42504	1.31839e-10	1.61672e-09	DPY19L4	286148	1.6953e-09	106	113	70	248	253	289
1656	ENSG00000065057	173.252	-1.4896	0.232019	-6.42015	1.36144e-10	1.66851e-09	NTHL1	4913	1.7496e-09	249	282	236	117	71	85
1657	ENSG00000163558	437.621	1.06127	0.165309	6.41992	1.36346e-10	1.66997e-09	PRKCI	5584	1.75114e-09	306	277	267	529	649	597
1658	ENSG00000108826	634.297	-1.00087	0.155913	-6.41941	1.36799e-10	1.67451e-09	MRPL27	51264	1.7559e-09	814	829	895	481	394	393
1659	ENSG00000165280	7466.78	-0.866253	0.134974	-6.41792	1.38146e-10	1.68955e-09	VCP	7415	1.77166e-09	10609	9839	8482	5402	5158	5311
1660	ENSG00000173327	899.638	-1.52735	0.237984	-6.41787	1.38194e-10	1.68955e-09	MAP3K11	4296	1.77166e-09	1371	1508	1129	673	371	346
1661	ENSG00000148290	266.34	-1.15169	0.17946	-6.41752	1.3851e-10	1.69239e-09	SURF1	6834	1.77465e-09	370	337	395	160	154	183
1662	ENSG00000170927	42.7576	4.05732	0.632293	6.41683	1.39145e-10	1.69912e-09	PKHD1	5314	1.78171e-09	5	5	5	39	44	159
1663	ENSG00000184164	300.228	-1.42113	0.221529	-6.41511	1.40725e-10	1.71739e-09	CRELD2	79174	1.80086e-09	502	428	382	211	155	123
1664	ENSG00000119421	555.607	-1.0252	0.159874	-6.41253	1.43122e-10	1.74559e-09	NDUFA8	4702	1.83043e-09	756	654	825	387	343	368
1665	ENSG00000140398	26.9546	4.29623	0.670135	6.41099	1.44575e-10	1.76226e-09	NEIL1	79661	1.84791e-09	2	5	1	47	41	65
1666	ENSG00000279041	29.7805	3.3931	0.529345	6.41	1.45517e-10	1.77267e-09	CTD-2373N4.3	NA	1.85883e-09	8	3	4	46	58	59
1667	ENSG00000146054	119.049	-1.6688	0.260353	-6.40976	1.4575e-10	1.77444e-09	TRIM7	81786	1.86068e-09	206	171	166	76	48	47
1668	ENSG00000105988	90.0155	-1.60299	0.250093	-6.40957	1.45935e-10	1.77563e-09	NHP2P1	NA	1.86193e-09	134	126	147	46	43	44
1669	ENSG00000196586	418.187	1.17479	0.183388	6.40606	1.4933e-10	1.81584e-09	MYO6	4646	1.9041e-09	222	251	298	506	654	578
1670	ENSG00000198373	467.974	-1.08514	0.169401	-6.40576	1.49625e-10	1.81834e-09	WWP2	11060	1.90672e-09	640	675	594	351	274	274
1671	ENSG00000032219	136.428	1.65361	0.258215	6.40399	1.51366e-10	1.8384e-09	ARID4A	5926	1.92775e-09	64	50	83	164	234	223
1672	ENSG00000197483	77.3124	-2.3569	0.368043	-6.40387	1.51492e-10	1.83883e-09	ZNF628	89887	1.92821e-09	159	130	100	42	19	15
1673	ENSG00000067167	3500.89	1.24897	0.195039	6.40367	1.51686e-10	1.84009e-09	TRAM1	23471	1.92952e-09	2373	2106	1740	4515	6322	3948
1674	ENSG00000165029	34.3128	3.59889	0.562122	6.40233	1.53021e-10	1.85518e-09	ABCA1	19	1.94534e-09	5	3	7	34	89	67
1675	ENSG00000233837	87.0317	-1.75555	0.274361	-6.39867	1.56733e-10	1.89904e-09	EIF3LP2	NA	1.99134e-09	116	152	135	46	42	30
1676	ENSG00000122971	168.463	-1.29927	0.203058	-6.3985	1.56912e-10	1.90008e-09	ACADS	35	1.99243e-09	229	242	248	111	94	87
1677	ENSG00000178607	159.269	1.36622	0.213543	6.39785	1.57584e-10	1.90707e-09	ERN1	2081	1.99976e-09	82	81	104	212	235	242
1678	ENSG00000160326	195.68	-1.62937	0.254687	-6.39751	1.57928e-10	1.9101e-09	SLC2A6	11182	2.00294e-09	306	352	230	127	90	70
1679	ENSG00000214391	987.319	-1.43884	0.224973	-6.39559	1.59929e-10	1.93316e-09	TUBAP2	NA	2.02711e-09	1702	1649	977	658	461	476
1680	ENSG00000189159	1927.92	-1.10562	0.172882	-6.39522	1.6032e-10	1.93672e-09	HN1	51155	2.03085e-09	2438	2966	2494	1396	1308	965
1681	ENSG00000102878	32.8099	3.04198	0.475722	6.39445	1.61131e-10	1.94537e-09	HSF4	3299	2.03992e-09	5	9	7	66	48	62
1682	ENSG00000230202	814.541	-1.02276	0.159952	-6.39417	1.61418e-10	1.94767e-09	RP11-632C17__A.1	NA	2.04233e-09	1005	1015	1255	520	593	499
1683	ENSG00000158747	413.088	-1.61793	0.253159	-6.39097	1.64839e-10	1.98777e-09	NBL1	4681	2.08438e-09	669	648	552	304	161	144
1684	ENSG00000122140	349.049	-1.56094	0.244286	-6.38982	1.66085e-10	2.0016e-09	MRPS2	51116	2.09888e-09	495	603	467	254	136	140
1685	ENSG00000111731	295.382	1.26034	0.197279	6.38862	1.67384e-10	2.01606e-09	C2CD5	9847	2.11405e-09	190	161	171	343	416	492
1686	ENSG00000109062	1039.6	-0.987478	0.15462	-6.38646	1.69765e-10	2.04353e-09	SLC9A3R1	100500847	2.14285e-09	1482	1346	1318	807	655	629
1687	ENSG00000259781	278.538	-1.22174	0.191315	-6.38599	1.70294e-10	2.04867e-09	RP11-673C5.1	NA	2.14824e-09	394	420	356	199	146	156
1688	ENSG00000204253	904.319	-0.864562	0.135438	-6.38344	1.73157e-10	2.08188e-09	HNRNPCP2	NA	2.18306e-09	1108	1174	1221	651	617	656
1689	ENSG00000115685	517.33	-1.09538	0.171717	-6.37897	1.7828e-10	2.14194e-09	PPP1R7	5510	2.24604e-09	660	639	816	323	368	298
1690	ENSG00000204220	355.874	-1.10642	0.173449	-6.3789	1.78363e-10	2.14194e-09	PFDN6	102465501	2.24604e-09	439	460	560	235	228	214
1691	ENSG00000198105	107.695	1.87307	0.29372	6.37707	1.80513e-10	2.16647e-09	ZNF248	57209	2.27177e-09	52	30	57	134	165	209
1692	ENSG00000175893	152.975	1.55365	0.243642	6.37678	1.80848e-10	2.16922e-09	ZDHHC21	340481	2.27465e-09	84	74	75	186	207	291
1693	ENSG00000265688	68.9562	-2.00904	0.315083	-6.37624	1.81488e-10	2.17561e-09	MAFG-AS1	92659	2.28135e-09	111	118	103	39	24	19
1694	ENSG00000272888	175.571	1.39983	0.219552	6.37583	1.8198e-10	2.17964e-09	LINC01578	NA	2.28558e-09	76	99	115	232	274	257
1695	ENSG00000104679	298.086	-1.20252	0.188608	-6.37578	1.82039e-10	2.17964e-09	R3HCC1	203069	2.28558e-09	436	453	358	208	169	165
1696	ENSG00000146530	40.2276	2.68547	0.421224	6.3754	1.82483e-10	2.18367e-09	VWDE	221806	2.2898e-09	10	11	11	50	80	78
1697	ENSG00000127445	327.167	-1.56438	0.245459	-6.37326	1.85056e-10	2.21315e-09	PIN1	5300	2.32071e-09	477	543	447	240	132	123
1698	ENSG00000181817	250.558	-1.24842	0.195928	-6.37181	1.86811e-10	2.23282e-09	LSM10	84967	2.34134e-09	340	376	343	178	144	123
1699	ENSG00000088833	1099.05	-0.950796	0.149239	-6.37098	1.87823e-10	2.24359e-09	NSFL1C	55968	2.35263e-09	1458	1482	1406	860	718	669
1700	ENSG00000203875	2071.44	-1.03673	0.162824	-6.3672	1.92508e-10	2.29821e-09	SNHG5	NA	2.40991e-09	2518	2714	3125	1396	1544	1132
1701	ENSG00000105755	338.686	-1.12446	0.176683	-6.36429	1.962e-10	2.34091e-09	ETHE1	23474	2.45468e-09	466	476	452	245	214	180
1702	ENSG00000172889	141.82	-1.66909	0.2624	-6.36085	2.00642e-10	2.3925e-09	EGFL7	51162	2.50878e-09	198	236	213	96	55	52
1703	ENSG00000167397	164.478	-1.2786	0.201023	-6.36045	2.01162e-10	2.39729e-09	VKORC1	79001	2.51381e-09	218	256	225	94	94	100
1704	ENSG00000179023	117.093	1.64921	0.25936	6.35874	2.0341e-10	2.42266e-09	KLHDC7A	127707	2.54041e-09	71	48	51	180	206	147
1705	ENSG00000115241	2360.33	-0.878091	0.138099	-6.35842	2.03841e-10	2.42637e-09	PPM1G	5496	2.5443e-09	3064	3208	2900	1826	1676	1488
1706	ENSG00000096080	132.737	-1.44021	0.226553	-6.35704	2.05682e-10	2.44685e-09	MRPS18A	55168	2.56577e-09	179	192	211	84	63	67
1707	ENSG00000142733	189.502	-1.41944	0.223311	-6.35633	2.06633e-10	2.45672e-09	MAP3K6	9064	2.57613e-09	319	255	254	129	88	92
1708	ENSG00000107560	153.446	1.48718	0.234111	6.35247	2.11889e-10	2.51773e-09	RAB11FIP2	22841	2.6401e-09	99	75	68	190	245	244
1709	ENSG00000125611	163.502	-1.953	0.30745	-6.35224	2.12206e-10	2.52003e-09	CHCHD5	84269	2.64251e-09	243	266	271	109	52	40
1710	ENSG00000136149	145.516	-1.66485	0.262226	-6.34889	2.1687e-10	2.57391e-09	RPL13AP25	NA	2.699e-09	203	235	225	77	43	89
1711	ENSG00000154582	831.373	-0.906775	0.142837	-6.34831	2.17699e-10	2.58224e-09	TCEB1	6921	2.70774e-09	1082	999	1172	595	590	550
1712	ENSG00000142409	422.512	-1.79122	0.282203	-6.34728	2.19158e-10	2.59706e-09	ZNF787	126208	2.72328e-09	640	688	639	306	143	119
1713	ENSG00000164032	2411.13	-0.912595	0.143778	-6.34725	2.19205e-10	2.59706e-09	H2AFZ	3015	2.72328e-09	3224	3362	2862	1877	1552	1590
1714	ENSG00000169093	111.964	-1.60891	0.253504	-6.3467	2.19986e-10	2.60423e-09	ASMTL	8623	2.7308e-09	177	174	155	69	55	41
1715	ENSG00000088340	26.7446	8.01866	1.26345	6.34664	2.20067e-10	2.60423e-09	FER1L4	NA	2.7308e-09	0	0	0	40	36	85
1716	ENSG00000106404	57.3071	2.16555	0.341242	6.34607	2.2088e-10	2.61233e-09	CLDN15	24146	2.73929e-09	20	22	21	108	71	103
1717	ENSG00000186501	214.48	-1.27891	0.201579	-6.34444	2.23235e-10	2.63865e-09	TMEM222	84065	2.76689e-09	313	325	273	139	102	134
1718	ENSG00000148308	396.732	-1.28801	0.203036	-6.34375	2.24246e-10	2.64905e-09	GTF3C5	9328	2.7778e-09	591	585	513	296	181	214
1719	ENSG00000064961	623.714	-1.1222	0.17692	-6.34298	2.25368e-10	2.66076e-09	HMG20B	10362	2.79008e-09	859	811	895	461	311	406
1720	ENSG00000184281	299.482	-1.58956	0.250659	-6.34152	2.27507e-10	2.68446e-09	TSSC4	10078	2.81493e-09	424	452	473	218	127	102
1721	ENSG00000164087	160.6	-1.44898	0.228571	-6.33932	2.30781e-10	2.7215e-09	POC1A	25886	2.85377e-09	254	257	194	104	79	75
1722	ENSG00000132589	1082.5	-1.11958	0.176642	-6.33814	2.32556e-10	2.74084e-09	FLOT2	2319	2.87405e-09	1591	1545	1312	841	611	594
1723	ENSG00000137440	86.2206	-1.73258	0.273406	-6.33705	2.34213e-10	2.75876e-09	FGFBP1	9982	2.89285e-09	163	126	109	41	39	40
1724	ENSG00000023697	518.512	-1.00903	0.159268	-6.33544	2.36667e-10	2.78572e-09	DERA	51071	2.92112e-09	676	630	772	323	341	369
1725	ENSG00000184363	553.802	-1.6902	0.266787	-6.33537	2.36776e-10	2.78572e-09	PKP3	11187	2.92112e-09	840	941	756	409	200	177
1726	ENSG00000031823	382.965	-1.15763	0.18274	-6.33483	2.37601e-10	2.79381e-09	RANBP3	8498	2.92959e-09	534	554	499	285	227	199
1727	ENSG00000106460	888.813	1.04085	0.164315	6.33446	2.3817e-10	2.79887e-09	TMEM106B	54664	2.93491e-09	608	582	554	980	1280	1328
1728	ENSG00000140443	1330.56	0.903099	0.142578	6.33407	2.38779e-10	2.80441e-09	IGF1R	3480	2.94071e-09	905	1044	833	1704	1722	1776
1729	ENSG00000160783	149.629	-1.37667	0.217374	-6.33317	2.40168e-10	2.81909e-09	PMF1	11243	2.9561e-09	195	233	220	95	71	83
1730	ENSG00000253217	36.4377	3.20919	0.506781	6.33249	2.41234e-10	2.82915e-09	KB-1991G8.1	NA	2.96666e-09	6	6	9	42	96	59
1731	ENSG00000165775	603.729	-0.924305	0.145963	-6.33245	2.41304e-10	2.82915e-09	FUNDC2	65991	2.96666e-09	801	760	811	385	426	439
1732	ENSG00000167644	58.1053	-2.52112	0.398375	-6.3285	2.47555e-10	2.90076e-09	C19orf33	64073	3.04175e-09	87	115	95	31	10	11
1733	ENSG00000104964	1643.92	-1.16213	0.18364	-6.32829	2.47894e-10	2.90306e-09	AES	166	3.04416e-09	2389	2142	2287	1275	779	992
1734	ENSG00000104643	174.887	1.33316	0.210702	6.32724	2.4959e-10	2.92124e-09	MTMR9	66036	3.06322e-09	105	96	97	211	266	275
1735	ENSG00000103274	159.78	-1.41944	0.224355	-6.32676	2.50359e-10	2.92855e-09	NUBP1	4682	3.07089e-09	211	208	280	99	79	83
1736	ENSG00000160767	306.966	-1.39669	0.220848	-6.32419	2.5456e-10	2.97597e-09	FAM189B	10712	3.12061e-09	441	547	347	207	149	151
1737	ENSG00000135480	11855.4	-1.17592	0.185982	-6.32276	2.56932e-10	3.00198e-09	KRT7	3855	3.14789e-09	15504	17953	15852	9333	6895	5595
1738	ENSG00000173230	1570.9	1.34722	0.213118	6.32147	2.59079e-10	3.02533e-09	GOLGB1	2804	3.17237e-09	961	718	980	1563	2498	2705
1739	ENSG00000101596	468.871	1.11608	0.176561	6.32121	2.59527e-10	3.02881e-09	SMCHD1	23347	3.17601e-09	313	325	249	577	626	722
1740	ENSG00000118058	375.905	1.29576	0.205094	6.3179	2.65148e-10	3.09264e-09	KMT2A	4297	3.24295e-09	227	226	199	424	504	675
1741	ENSG00000260912	38.2792	3.12649	0.494893	6.31751	2.65807e-10	3.09853e-09	RP11-363E7.4	NA	3.24913e-09	5	11	7	52	102	51
1742	ENSG00000157625	264.734	1.30769	0.20705	6.3158	2.68767e-10	3.13124e-09	TAB3	257397	3.28343e-09	155	156	146	290	418	424
1743	ENSG00000236675	242.852	-1.12827	0.17866	-6.3152	2.69814e-10	3.14164e-09	MTX1P1	NA	3.29433e-09	339	330	331	168	139	150
1744	ENSG00000134686	484.394	-1.21023	0.1917	-6.31313	2.73442e-10	3.18206e-09	PHC2	100500853	3.33672e-09	585	684	761	353	285	238
1745	ENSG00000214389	806.546	-0.960003	0.152084	-6.31231	2.74907e-10	3.19727e-09	RPS3AP26	NA	3.35267e-09	1017	1029	1151	510	618	515
1746	ENSG00000112701	500.504	1.08938	0.172753	6.30597	2.86392e-10	3.32893e-09	SENP6	26054	3.49073e-09	309	305	346	567	728	747
1747	ENSG00000130985	4294.96	-0.979911	0.155416	-6.30511	2.87998e-10	3.34569e-09	UBA1	7317	3.5083e-09	6424	5704	4972	3289	2774	2606
1748	ENSG00000258441	257.86	1.62294	0.257445	6.30404	2.89983e-10	3.36682e-09	LINC00641	283624	3.53046e-09	126	162	91	327	323	519
1749	ENSG00000053900	184.946	1.32125	0.209613	6.30327	2.91428e-10	3.38166e-09	ANAPC4	29945	3.54602e-09	121	102	94	232	271	291
1750	ENSG00000131069	653.862	-0.923299	0.146482	-6.30317	2.91624e-10	3.38201e-09	ACSS2	55902	3.54638e-09	918	855	795	467	461	426
1751	ENSG00000100347	730.781	-1.01054	0.160326	-6.30306	2.91819e-10	3.38234e-09	SAMM50	25813	3.54673e-09	980	957	993	485	559	410
1752	ENSG00000139211	1537.8	0.913738	0.144973	6.30281	2.92303e-10	3.38601e-09	AMIGO2	347902	3.55058e-09	996	1078	1126	1918	2263	1846
1753	ENSG00000153339	265.38	1.31496	0.208675	6.30149	2.9479e-10	3.41287e-09	TRAPPC8	22878	3.57874e-09	195	127	134	347	387	402
1754	ENSG00000141456	991.524	-1.09216	0.173322	-6.30132	2.9512e-10	3.41474e-09	PELP1	27043	3.5807e-09	1351	1448	1252	755	635	508
1755	ENSG00000132561	73.5914	1.83145	0.290769	6.29864	3.00277e-10	3.47079e-09	MATN2	4147	3.63948e-09	38	29	30	100	124	121
1756	ENSG00000108883	2206.08	-0.852178	0.135296	-6.29862	3.00306e-10	3.47079e-09	EFTUD2	9343	3.63948e-09	2966	3015	2537	1616	1596	1506
1757	ENSG00000118508	381.959	-0.990392	0.157292	-6.29654	3.04371e-10	3.51577e-09	RAB32	10981	3.68665e-09	538	503	482	258	264	245
1758	ENSG00000185499	117.816	-1.74243	0.276738	-6.29629	3.04844e-10	3.51923e-09	MUC1	4582	3.69028e-09	212	132	200	69	42	51
1759	ENSG00000066923	40.9614	2.83928	0.450972	6.2959	3.05622e-10	3.5262e-09	STAG3	10734	3.69758e-09	10	14	6	53	64	99
1760	ENSG00000170471	949.282	1.00207	0.159197	6.29454	3.08303e-10	3.55512e-09	RALGAPB	57148	3.72791e-09	647	661	588	1063	1375	1362
1761	ENSG00000185624	8390.24	-0.832907	0.132329	-6.2942	3.08992e-10	3.56104e-09	P4HB	5034	3.73411e-09	11689	10353	10200	6488	6045	5567
1762	ENSG00000100300	652.105	-1.75452	0.278768	-6.29383	3.09722e-10	3.56743e-09	TSPO	706	3.74081e-09	948	1091	979	453	284	157
1763	ENSG00000135720	967.704	1.03338	0.164216	6.2928	3.11793e-10	3.58925e-09	DYNC1LI2	1783	3.76369e-09	699	676	530	1159	1408	1334
1764	ENSG00000175311	198.776	-1.25362	0.19927	-6.29105	3.15319e-10	3.62777e-09	ANKS4B	257629	3.80409e-09	314	263	263	111	133	108
1765	ENSG00000237190	335.367	-1.22122	0.194144	-6.29029	3.16878e-10	3.64357e-09	CDKN2AIPNL	91368	3.82065e-09	447	489	473	241	207	155
1766	ENSG00000179010	2506.14	-0.815561	0.129656	-6.2902	3.17051e-10	3.64357e-09	MRFAP1	93621	3.82065e-09	3244	3075	3271	1975	1759	1714
1767	ENSG00000177556	291.642	-1.11333	0.177031	-6.28887	3.19777e-10	3.67282e-09	ATOX1	475	3.85133e-09	412	392	394	210	180	163
1768	ENSG00000132612	583.704	-0.939737	0.149441	-6.28834	3.20886e-10	3.68348e-09	VPS4A	27183	3.8625e-09	826	734	742	417	371	412
1769	ENSG00000120008	595.486	1.28731	0.204719	6.28821	3.21157e-10	3.6845e-09	WDR11	55717	3.86357e-09	380	397	261	689	857	989
1770	ENSG00000127980	262.471	1.27355	0.202538	6.28796	3.21673e-10	3.68834e-09	PEX1	5189	3.8676e-09	178	131	151	311	395	408
1771	ENSG00000234797	1984.39	-0.9141	0.145418	-6.28601	3.25722e-10	3.73155e-09	RPS3AP6	NA	3.91291e-09	2437	2588	2754	1331	1563	1234
1772	ENSG00000179387	228.574	1.17135	0.186344	6.28597	3.2581e-10	3.73155e-09	ELMOD2	255520	3.91291e-09	142	130	149	287	332	331
1773	ENSG00000101752	322.867	1.09442	0.174143	6.2846	3.28697e-10	3.76249e-09	MIB1	57534	3.94536e-09	217	217	184	415	422	483
1774	ENSG00000261236	1099.34	-1.52608	0.242845	-6.28419	3.29576e-10	3.77043e-09	BOP1	102465906	3.95368e-09	1562	1988	1347	810	492	397
1775	ENSG00000164331	101.312	1.73044	0.275378	6.28387	3.30247e-10	3.77598e-09	ANKRA2	57763	3.9595e-09	51	38	52	125	191	152
1776	ENSG00000160446	236.897	-1.88905	0.300785	-6.28042	3.37667e-10	3.85865e-09	ZDHHC12	84885	4.04619e-09	389	421	309	164	66	72
1777	ENSG00000279392	246.332	-1.13219	0.180278	-6.28023	3.38073e-10	3.86111e-09	RP11-665C16.9	NA	4.04877e-09	311	344	360	166	143	154
1778	ENSG00000167118	479.309	-1.16317	0.185235	-6.2794	3.39872e-10	3.87947e-09	URM1	81605	4.06803e-09	683	691	615	367	272	248
1779	ENSG00000181019	15039.5	-0.874348	0.139292	-6.27711	3.4492e-10	3.93489e-09	NQO1	1728	4.12613e-09	20939	16646	20801	10985	10421	10444
1780	ENSG00000163625	450.649	1.1834	0.188565	6.27581	3.47829e-10	3.96583e-09	WDFY3	23001	4.15858e-09	307	288	231	520	645	713
1781	ENSG00000109390	462.847	-1.10189	0.175627	-6.27402	3.51848e-10	4.00941e-09	NDUFC1	4717	4.20428e-09	594	589	711	330	249	303
1782	ENSG00000137076	4884.65	-0.983843	0.156819	-6.27375	3.52454e-10	4.01406e-09	TLN1	102465513	4.20915e-09	7060	6687	5719	3665	3417	2761
1783	ENSG00000066117	967.051	-0.853857	0.136103	-6.27363	3.52716e-10	4.01479e-09	SMARCD1	6602	4.20992e-09	1246	1233	1257	710	634	723
1784	ENSG00000213066	43.8184	2.61538	0.41703	6.27145	3.57709e-10	4.06934e-09	FGFR1OP	11116	4.26712e-09	10	21	6	74	68	84
1785	ENSG00000168092	1150.14	-0.804144	0.128299	-6.26771	3.66394e-10	4.16581e-09	PAFAH1B2	5049	4.36828e-09	1450	1476	1462	864	837	812
1786	ENSG00000100410	422.165	-1.0562	0.168534	-6.26699	3.6809e-10	4.18274e-09	PHF5A	84844	4.38604e-09	506	611	594	306	259	257
1787	ENSG00000136144	155.594	1.29625	0.206888	6.26548	3.71683e-10	4.22121e-09	RCBTB1	55213	4.42637e-09	95	86	89	209	238	216
1788	ENSG00000131462	1054.24	-1.21531	0.194004	-6.26437	3.74342e-10	4.24903e-09	TUBG1	7283	4.45554e-09	1601	1654	1166	775	529	599
1789	ENSG00000125901	657.127	-1.27513	0.203579	-6.26355	3.76319e-10	4.26909e-09	MRPS26	64949	4.47658e-09	840	982	969	510	307	335
1790	ENSG00000186376	185.195	1.60271	0.255884	6.26343	3.76589e-10	4.26976e-09	ZNF75D	7626	4.47728e-09	94	79	102	188	326	322
1791	ENSG00000141338	46.5474	2.72262	0.434706	6.26312	3.77339e-10	4.27588e-09	ABCA8	10351	4.4837e-09	16	9	12	47	94	102
1792	ENSG00000131187	116.715	-2.20826	0.352688	-6.26122	3.81989e-10	4.32615e-09	F12	2161	4.53642e-09	206	220	149	69	36	19
1793	ENSG00000219507	87.2616	-1.9093	0.305007	-6.25984	3.85384e-10	4.36217e-09	FTH1P8	NA	4.57418e-09	131	128	155	54	26	30
1794	ENSG00000104524	220.589	-1.35357	0.21627	-6.25873	3.88134e-10	4.38981e-09	PYCRL	65263	4.60317e-09	318	370	263	149	117	106
1795	ENSG00000091483	1447.53	-0.929662	0.148541	-6.25862	3.88401e-10	4.38981e-09	FH	2271	4.60317e-09	1966	1770	1960	966	888	1136
1796	ENSG00000105321	309.597	-1.31179	0.209599	-6.25859	3.88475e-10	4.38981e-09	CCDC9	26093	4.60317e-09	450	414	460	231	139	164
1797	ENSG00000122299	349.899	1.0814	0.172806	6.25787	3.90274e-10	4.40769e-09	ZC3H7A	29066	4.62191e-09	213	248	213	440	528	458
1798	ENSG00000213619	863.899	-1.0921	0.174645	-6.25323	4.02062e-10	4.53829e-09	NDUFS3	4722	4.75886e-09	1120	1068	1341	608	447	599
1799	ENSG00000117500	470.997	1.09712	0.175611	6.24743	4.17256e-10	4.70718e-09	TMED5	50999	4.93596e-09	346	259	294	580	712	634
1800	ENSG00000161638	309.772	-1.13109	0.18106	-6.24701	4.18395e-10	4.71741e-09	ITGA5	3678	4.94669e-09	360	432	485	198	191	193
1801	ENSG00000168453	379.639	-1.57198	0.251839	-6.242	4.32009e-10	4.8682e-09	HR	55806	5.10481e-09	593	517	594	218	109	246
1802	ENSG00000071462	756.559	-1.07019	0.171489	-6.2406	4.35883e-10	4.90913e-09	WBSCR22	114049	5.14772e-09	997	976	1102	594	435	435
1803	ENSG00000085224	1084.75	1.19219	0.191054	6.24009	4.37323e-10	4.92262e-09	ATRX	546	5.16187e-09	687	627	667	1099	1627	1801
1804	ENSG00000164181	317.079	1.25902	0.201814	6.23851	4.41749e-10	4.96967e-09	ELOVL7	79993	5.21121e-09	193	185	183	363	555	424
1805	ENSG00000197780	179.214	1.26383	0.202604	6.2379	4.43482e-10	4.9864e-09	TAF13	6884	5.22876e-09	117	107	91	266	256	237
1806	ENSG00000163468	5430.01	-0.758265	0.121607	-6.23535	4.50766e-10	5.0655e-09	CCT3	7203	5.31169e-09	6940	7122	6413	4125	4075	3905
1807	ENSG00000173698	260.21	1.22406	0.196323	6.23491	4.52037e-10	5.07697e-09	ADGRG2	10149	5.32373e-09	167	167	134	332	424	338
1808	ENSG00000180071	96.3676	1.92235	0.308416	6.23297	4.57662e-10	5.13731e-09	ANKRD18A	253650	5.38699e-09	45	29	47	113	145	200
1809	ENSG00000124882	212.273	1.4787	0.237296	6.23147	4.62067e-10	5.18388e-09	EREG	2069	5.43583e-09	96	137	103	340	364	233
1810	ENSG00000125798	199.679	-1.68288	0.270164	-6.2291	4.69113e-10	5.26002e-09	FOXA2	3170	5.51567e-09	248	281	385	117	109	59
1811	ENSG00000242485	505.341	-1.01423	0.162833	-6.22866	4.70431e-10	5.27189e-09	MRPL20	55052	5.52812e-09	680	652	696	380	289	335
1812	ENSG00000149212	452.362	1.36402	0.219001	6.22841	4.71207e-10	5.27767e-09	SESN3	143686	5.53418e-09	306	220	232	496	634	825
1813	ENSG00000110108	565.171	-1.2974	0.208324	-6.22779	4.73072e-10	5.29564e-09	TMEM109	79073	5.55302e-09	853	920	638	409	309	262
1814	ENSG00000101220	594.119	-1.70859	0.274355	-6.22766	4.73456e-10	5.29702e-09	C20orf27	54976	5.55447e-09	896	1146	688	413	245	177
1815	ENSG00000165912	182.514	-1.58784	0.255121	-6.22388	4.85018e-10	5.42338e-09	PACSIN3	29763	5.68697e-09	262	303	257	128	81	63
1816	ENSG00000173482	965.906	1.03104	0.165754	6.22033	4.96124e-10	5.54225e-09	PTPRM	5797	5.81161e-09	701	607	595	1180	1535	1176
1817	ENSG00000161618	215.984	-1.5811	0.254184	-6.2203	4.96194e-10	5.54225e-09	ALDH16A1	126133	5.81161e-09	354	364	254	150	91	84
1818	ENSG00000153048	410.39	-1.26244	0.203035	-6.21787	5.03955e-10	5.62584e-09	CARHSP1	23589	5.89927e-09	617	630	491	306	204	214
1819	ENSG00000110619	880.819	-1.28868	0.207386	-6.21395	5.16694e-10	5.76318e-09	CARS	833	6.04328e-09	974	1110	1667	571	503	461
1820	ENSG00000189077	358.655	-1.13951	0.18338	-6.21391	5.16826e-10	5.76318e-09	TMEM120A	83862	6.04328e-09	517	468	496	257	180	234
1821	ENSG00000170445	986.602	-0.824583	0.132726	-6.21267	5.20909e-10	5.80552e-09	HARS	3035	6.08768e-09	1318	1203	1261	702	706	729
1822	ENSG00000188229	3507.17	-1.57576	0.253661	-6.21205	5.2297e-10	5.82529e-09	TUBB4B	10383	6.10841e-09	5932	6222	3603	2530	1369	1386
1823	ENSG00000269378	3140.67	0.877612	0.14129	6.21142	5.25079e-10	5.84557e-09	ITGB1P1	NA	6.12968e-09	2236	2301	2104	3656	4611	3937
1824	ENSG00000085433	112.941	1.54601	0.248936	6.21047	5.28261e-10	5.87777e-09	WDR47	22911	6.16345e-09	50	64	59	146	161	197
1825	ENSG00000188158	149.757	1.46428	0.235808	6.20966	5.30997e-10	5.90498e-09	NHS	4810	6.19198e-09	73	79	88	185	204	270
1826	ENSG00000144674	1482.18	1.1809	0.190283	6.206	5.43485e-10	6.04054e-09	GOLGA4	2803	6.33413e-09	1018	829	875	1525	2442	2205
1827	ENSG00000066777	592.887	1.1129	0.179343	6.2054	5.45568e-10	6.06038e-09	ARFGEF1	10565	6.35493e-09	425	358	340	663	876	894
1828	ENSG00000263002	61.3526	2.15161	0.346798	6.20422	5.49689e-10	6.10281e-09	ZNF234	10780	6.39942e-09	15	31	23	82	99	120
1829	ENSG00000100387	384.937	-1.01587	0.163777	-6.20277	5.54796e-10	6.15441e-09	RBX1	9978	6.45353e-09	487	540	519	274	263	227
1830	ENSG00000130193	385.297	-1.30794	0.210865	-6.20272	5.54943e-10	6.15441e-09	THEM6	51337	6.45353e-09	593	628	426	272	193	200
1831	ENSG00000204922	129.545	-1.7372	0.280223	-6.19934	5.6702e-10	6.28492e-09	UQCC3	790955	6.59038e-09	170	240	188	85	46	48
1832	ENSG00000117362	841.918	-0.982789	0.15859	-6.19705	5.75303e-10	6.37324e-09	APH1A	51107	6.683e-09	1166	1239	950	606	559	532
1833	ENSG00000100280	1315.13	-1.15184	0.185884	-6.19653	5.77226e-10	6.38827e-09	AP1B1	162	6.69875e-09	1979	1884	1579	987	834	628
1834	ENSG00000100129	2124.46	-0.923989	0.149114	-6.19651	5.77289e-10	6.38827e-09	EIF3L	51386	6.69875e-09	2848	2646	2852	1333	1714	1352
1835	ENSG00000161999	230.026	-1.41993	0.229177	-6.19578	5.79987e-10	6.41462e-09	JMJD8	339123	6.72639e-09	373	348	283	165	109	101
1836	ENSG00000106683	416.788	-1.23405	0.199208	-6.19476	5.83745e-10	6.45025e-09	LIMK1	3984	6.76375e-09	607	663	485	290	259	197
1837	ENSG00000188372	250.047	-1.29182	0.208535	-6.19473	5.83844e-10	6.45025e-09	ZP3	7784	6.76375e-09	350	337	379	181	140	113
1838	ENSG00000103145	511.288	-1.41285	0.228153	-6.19254	5.92015e-10	6.53697e-09	HCFC1R1	54985	6.85468e-09	710	927	594	366	219	252
1839	ENSG00000233621	243.671	-1.44401	0.233211	-6.19185	5.94633e-10	6.56231e-09	LINC01137	728431	6.88125e-09	310	337	422	124	98	171
1840	ENSG00000161203	2509.78	-0.812515	0.131276	-6.18936	6.04085e-10	6.66299e-09	AP2M1	1173	6.98683e-09	3388	3177	3030	1969	1755	1739
1841	ENSG00000242114	43.2814	-2.6227	0.423776	-6.18887	6.05955e-10	6.67999e-09	MTFP1	51537	7.00465e-09	70	90	64	21	8	7
1842	ENSG00000226532	67.0631	-1.86933	0.302069	-6.18842	6.07696e-10	6.69208e-09	RP5-1052M9.1	NA	7.01733e-09	94	126	96	33	23	30
1843	ENSG00000160781	25.5086	4.71236	0.76148	6.18842	6.07711e-10	6.69208e-09	PAQR6	79957	7.01733e-09	0	5	1	50	39	59
1844	ENSG00000245662	130.992	1.39639	0.225716	6.18647	6.15249e-10	6.7714e-09	RP11-184E9.1	NA	7.10051e-09	65	78	73	168	203	199
1845	ENSG00000166415	424.009	1.21921	0.197097	6.18583	6.17774e-10	6.79551e-09	WDR72	256764	7.12579e-09	251	250	263	448	634	699
1846	ENSG00000140365	612.96	-1.33681	0.216133	-6.18511	6.20594e-10	6.82283e-09	COMMD4	54939	7.15444e-09	814	1021	800	463	260	319
1847	ENSG00000100304	854.229	-1.71045	0.276573	-6.18443	6.23263e-10	6.84847e-09	TTLL12	23170	7.18132e-09	1421	1479	1027	566	421	212
1848	ENSG00000115677	6775.54	-0.794956	0.128643	-6.17956	6.42809e-10	7.05942e-09	HDLBP	3069	7.40252e-09	9153	8352	8284	4728	5385	4751
1849	ENSG00000105612	285.345	-1.23566	0.199978	-6.17898	6.45163e-10	7.08144e-09	DNASE2	1777	7.42562e-09	349	368	486	193	155	162
1850	ENSG00000181904	440.934	1.04687	0.169458	6.17773	6.50278e-10	7.13373e-09	C5orf24	134553	7.48044e-09	327	256	280	548	589	646
1851	ENSG00000101158	711.855	-0.909015	0.147153	-6.17736	6.51833e-10	7.14692e-09	NELFCD	51497	7.49428e-09	975	924	888	493	452	540
1852	ENSG00000163541	1071.8	-0.891542	0.144336	-6.17684	6.53953e-10	7.1663e-09	SUCLG1	8802	7.5146e-09	1377	1247	1555	748	762	743
1853	ENSG00000106554	1173.7	-0.842421	0.136427	-6.17488	6.62118e-10	7.25186e-09	CHCHD3	54927	7.60431e-09	1619	1413	1488	816	819	887
1854	ENSG00000141376	279.175	-1.13716	0.184188	-6.1739	6.66248e-10	7.29315e-09	BCAS3	54828	7.64762e-09	348	360	445	176	162	185
1855	ENSG00000100319	72.3679	-1.73679	0.281316	-6.1738	6.66692e-10	7.29408e-09	ZMAT5	55954	7.64859e-09	115	100	119	38	34	28
1856	ENSG00000081014	335.71	1.26117	0.204296	6.17328	6.68885e-10	7.31412e-09	AP4E1	23431	7.66961e-09	230	207	155	400	477	544
1857	ENSG00000110104	438.74	-1.36464	0.221068	-6.17292	6.70397e-10	7.32291e-09	CCDC86	79080	7.67883e-09	637	724	536	329	214	193
1858	ENSG00000132716	250.028	1.13141	0.183286	6.17292	6.7041e-10	7.32291e-09	DCAF8	50717	7.67883e-09	152	155	162	304	371	356
1859	ENSG00000095906	400.677	-1.68114	0.272357	-6.17255	6.7197e-10	7.336e-09	NUBP2	10101	7.69255e-09	590	728	514	294	141	136
1860	ENSG00000101400	105.938	-1.60701	0.260447	-6.17021	6.8201e-10	7.44161e-09	SNTA1	6640	7.80329e-09	175	154	149	68	49	40
1861	ENSG00000164329	308.67	1.1247	0.182281	6.17012	6.82401e-10	7.44187e-09	PAPD4	167153	7.80357e-09	221	175	186	377	453	440
1862	ENSG00000066739	432.519	1.21699	0.197252	6.1697	6.8418e-10	7.45727e-09	ATG2B	55102	7.81971e-09	260	259	261	470	596	749
1863	ENSG00000178718	177.834	-1.35456	0.219561	-6.1694	6.85509e-10	7.46774e-09	RPP25	54913	7.83069e-09	244	287	237	123	93	84
1864	ENSG00000127418	247.312	-1.4962	0.242529	-6.16918	6.86439e-10	7.47386e-09	FGFRL1	53834	7.83711e-09	394	371	331	183	109	97
1865	ENSG00000126773	438.605	1.10183	0.178634	6.1681	6.91175e-10	7.52139e-09	PCNX4	64430	7.88695e-09	285	290	261	501	597	697
1866	ENSG00000167671	337.725	-1.17411	0.190531	-6.1623	7.16956e-10	7.79776e-09	UBXN6	80700	8.17675e-09	488	448	469	249	208	165
1867	ENSG00000040608	52.0584	-2.48366	0.403047	-6.16219	7.17445e-10	7.7989e-09	RTN4R	65078	8.17794e-09	92	95	78	26	14	6
1868	ENSG00000150779	409.623	-1.04597	0.16979	-6.16037	7.25741e-10	7.88486e-09	TIMM8B	26521	8.26808e-09	502	566	588	297	271	234
1869	ENSG00000105726	598.641	-1.11492	0.181135	-6.15519	7.49868e-10	8.14263e-09	ATP13A1	57130	8.53838e-09	871	770	817	469	319	347
1870	ENSG00000176101	370.648	-1.85688	0.301696	-6.15479	7.5179e-10	8.15913e-09	SSNA1	8636	8.55568e-09	573	634	537	266	89	126
1871	ENSG00000117411	452.655	-1.40579	0.228434	-6.15402	7.55439e-10	8.19435e-09	B4GALT2	8704	8.59261e-09	695	765	512	330	196	218
1872	ENSG00000109618	65.5656	2.02434	0.328955	6.15386	7.5619e-10	8.19812e-09	SEPSECS	51091	8.59657e-09	23	18	37	89	109	118
1873	ENSG00000006025	69.0664	1.81356	0.294729	6.1533	7.58851e-10	8.22257e-09	OSBPL7	114881	8.62221e-09	30	27	34	104	122	97
1874	ENSG00000082781	2391.88	-0.94448	0.153514	-6.15242	7.63098e-10	8.26418e-09	ITGB5	3693	8.66584e-09	3268	3045	3132	1943	1525	1439
1875	ENSG00000152332	1137.91	1.1603	0.188672	6.1498	7.758e-10	8.39726e-09	UHMK1	127933	8.80539e-09	804	728	577	1262	1591	1864
1876	ENSG00000122970	646.413	1.18159	0.192242	6.14636	7.92821e-10	8.57691e-09	IFT81	28981	8.99377e-09	404	356	427	721	848	1123
1877	ENSG00000123636	223.033	1.42733	0.232298	6.14442	8.02585e-10	8.67793e-09	BAZ2B	29994	9.0997e-09	99	120	145	246	364	366
1878	ENSG00000163156	213.838	-1.43746	0.234021	-6.14244	8.12653e-10	8.7821e-09	SCNM1	100534012	9.20893e-09	249	283	405	135	107	104
1879	ENSG00000170160	36.4742	6.59331	1.07363	6.14111	8.19486e-10	8.85124e-09	CCDC144A	9720	9.28143e-09	0	1	1	59	74	84
1880	ENSG00000135083	161.286	-1.37484	0.223893	-6.14063	8.21968e-10	8.87332e-09	CCNJL	79616	9.30458e-09	200	260	238	99	98	72
1881	ENSG00000123349	1459.53	-0.870477	0.141772	-6.13996	8.25419e-10	8.90583e-09	PFDN5	5204	9.33868e-09	1699	1847	2115	1025	1062	1009
1882	ENSG00000103257	23830.9	-1.31483	0.214172	-6.13911	8.29838e-10	8.94875e-09	SLC7A5	8140	9.38368e-09	34535	38122	29333	19006	11543	10447
1883	ENSG00000143398	609.533	0.980992	0.159813	6.13837	8.3372e-10	8.98584e-09	PIP5K1A	8394	9.42258e-09	379	459	392	760	896	771
1884	ENSG00000166004	115.615	1.62553	0.264835	6.13788	8.363e-10	9.00887e-09	CEP295	85459	9.44672e-09	71	54	45	139	191	194
1885	ENSG00000173889	367.33	1.22592	0.199741	6.13757	8.37913e-10	9.02146e-09	PHC3	80012	9.45992e-09	259	203	197	431	498	616
1886	ENSG00000175868	51.152	-2.1792	0.355087	-6.13708	8.40544e-10	9.04498e-09	CALCB	797	9.48459e-09	84	80	88	27	13	15
1887	ENSG00000145476	112.63	2.23519	0.364251	6.13639	8.44169e-10	9.07918e-09	CYP4V2	285440	9.52045e-09	53	35	30	106	162	290
1888	ENSG00000004455	1356.03	-0.790871	0.128885	-6.13624	8.44991e-10	9.08321e-09	AK2	204	9.52467e-09	1674	1723	1759	1044	950	986
1889	ENSG00000169567	2811.65	-0.774642	0.126323	-6.13225	8.6647e-10	9.30916e-09	HINT1	3094	9.76161e-09	3497	3333	3817	2044	2071	2108
1890	ENSG00000157326	245.221	-1.10787	0.180762	-6.12887	8.85045e-10	9.5037e-09	DHRS4	728635	9.9656e-09	344	301	359	158	146	163
1891	ENSG00000103995	120.17	1.61691	0.263856	6.12798	8.90024e-10	9.55211e-09	CEP152	22995	1.00164e-08	63	65	49	138	186	220
1892	ENSG00000084072	328.714	-1.00353	0.16378	-6.12731	8.938e-10	9.58756e-09	PPIE	10450	1.00535e-08	440	426	450	237	210	209
1893	ENSG00000138495	454.544	-1.00273	0.163656	-6.12707	8.95123e-10	9.59538e-09	COX17	10063	1.00617e-08	589	558	672	331	279	298
1894	ENSG00000183340	78.0351	1.84155	0.300562	6.12701	8.95474e-10	9.59538e-09	JRKL	8690	1.00617e-08	45	25	32	103	131	133
1895	ENSG00000205413	134.65	1.71967	0.280914	6.12169	9.25857e-10	9.91571e-09	SAMD9	54809	1.03976e-08	75	48	65	141	251	228
1896	ENSG00000183808	152.281	1.3997	0.228649	6.1216	9.26389e-10	9.91617e-09	RBM12B	389677	1.03981e-08	84	100	66	199	220	245
1897	ENSG00000104067	1350.62	0.950964	0.155364	6.12086	9.30699e-10	9.95303e-09	TJP1	7082	1.04368e-08	881	1065	817	1640	1930	1772
1898	ENSG00000141101	468.096	-1.00551	0.164276	-6.12082	9.30978e-10	9.95303e-09	NOB1	28987	1.04368e-08	572	658	646	352	289	292
1899	ENSG00000160789	3271.83	-1.25466	0.204984	-6.12076	9.31304e-10	9.95303e-09	LMNA	4000	1.04368e-08	4845	4937	4052	2603	1740	1454
1900	ENSG00000213341	433.074	1.01859	0.166447	6.11961	9.3804e-10	1.00197e-08	CHUK	1147	1.05067e-08	298	313	248	538	595	608
1901	ENSG00000011021	119.066	1.37243	0.224282	6.11922	9.40364e-10	1.00393e-08	CLCN6	1185	1.05272e-08	65	69	65	173	165	177
1902	ENSG00000164347	474.976	1.02539	0.167579	6.11888	9.42328e-10	1.0055e-08	GFM2	84340	1.05437e-08	308	308	322	548	722	641
1903	ENSG00000164258	695.633	-1.05401	0.172338	-6.11595	9.59822e-10	1.02363e-08	NDUFS4	4724	1.07338e-08	895	798	1124	417	478	462
1904	ENSG00000137504	508.767	0.964991	0.157806	6.11506	9.65218e-10	1.02837e-08	CREBZF	58487	1.07836e-08	379	323	332	701	617	701
1905	ENSG00000172366	407.383	-1.64642	0.269241	-6.11505	9.65288e-10	1.02837e-08	MCRIP2	100287175	1.07836e-08	595	651	607	310	141	140
1906	ENSG00000197782	142.908	1.5811	0.25865	6.11289	9.78418e-10	1.04182e-08	ZNF780A	284323	1.09245e-08	86	55	73	180	193	270
1907	ENSG00000164930	244.269	1.12962	0.18484	6.11133	9.88039e-10	1.05151e-08	FZD6	8323	1.10261e-08	164	146	149	299	359	348
1908	ENSG00000058272	452.349	1.06593	0.174473	6.10945	9.99768e-10	1.06343e-08	PPP1R12A	4659	1.11512e-08	311	271	295	512	652	673
1909	ENSG00000081087	257.485	1.13381	0.185602	6.10885	1.00354e-09	1.06669e-08	OSTM1	28962	1.11853e-08	173	169	141	334	390	337
1910	ENSG00000162616	199.66	1.47585	0.241595	6.10879	1.00388e-09	1.06669e-08	DNAJB4	11080	1.11853e-08	140	74	102	270	334	278
1911	ENSG00000182180	1384.24	-0.823731	0.134851	-6.10847	1.0059e-09	1.06784e-08	MRPS16	51021	1.11974e-08	1796	1884	1628	1046	965	987
1912	ENSG00000198363	6288.85	0.782729	0.128139	6.10845	1.00602e-09	1.06784e-08	ASPH	444	1.11974e-08	5062	4558	4250	7777	8002	8084
1913	ENSG00000102309	314.945	-1.05437	0.172613	-6.10828	1.00711e-09	1.06844e-08	PIN4	5303	1.12037e-08	399	398	478	193	213	209
1914	ENSG00000077157	214.741	1.40655	0.230281	6.10798	1.00897e-09	1.06985e-08	PPP1R12B	4660	1.12185e-08	142	116	94	248	320	368
1915	ENSG00000166595	452.009	-1.30131	0.213098	-6.1066	1.01774e-09	1.07859e-08	FAM96B	51647	1.13101e-08	594	728	607	346	202	234
1916	ENSG00000150459	969.599	-1.08053	0.177002	-6.10464	1.03033e-09	1.09136e-08	SAP18	10284	1.14441e-08	1180	1194	1575	668	523	676
1917	ENSG00000059728	39.4802	2.66312	0.436275	6.10422	1.03306e-09	1.09368e-08	MXD1	4084	1.14684e-08	13	7	12	60	91	54
1918	ENSG00000186481	51.1236	2.14048	0.350661	6.10412	1.03367e-09	1.09376e-08	ANKRD20A5P	NA	1.14692e-08	22	23	12	80	89	81
1919	ENSG00000117410	679.077	-1.10873	0.18164	-6.10402	1.03435e-09	1.09377e-08	ATP6V0B	533	1.14692e-08	967	959	858	539	376	375
1920	ENSG00000079435	32.5017	-2.58444	0.423404	-6.10396	1.03475e-09	1.09377e-08	LIPE	3991	1.14692e-08	59	56	52	11	11	6
1921	ENSG00000137100	307.736	-1.09943	0.180141	-6.10315	1.03996e-09	1.09818e-08	DCTN3	11258	1.15156e-08	405	402	453	227	174	187
1922	ENSG00000110011	156.354	-1.28095	0.209886	-6.10308	1.04046e-09	1.09818e-08	DNAJC4	3338	1.15156e-08	224	194	247	97	86	91
1923	ENSG00000136810	2996.3	-0.880746	0.144312	-6.10306	1.04055e-09	1.09818e-08	TXN	7295	1.15156e-08	3799	3441	4411	2233	1991	2104
1924	ENSG00000167461	285.462	-1.0665	0.174819	-6.1006	1.05673e-09	1.11468e-08	RAB8A	4218	1.16885e-08	404	381	375	208	176	170
1925	ENSG00000181163	15252.1	-0.714582	0.11716	-6.09918	1.06612e-09	1.124e-08	NPM1	4869	1.17863e-08	18505	18674	19683	11485	11992	11174
1926	ENSG00000080845	1109.81	-1.03196	0.169227	-6.09811	1.07331e-09	1.13099e-08	DLGAP4	22839	1.18596e-08	1611	1348	1513	830	588	770
1927	ENSG00000102178	653.583	-1.14167	0.187278	-6.09611	1.08679e-09	1.1446e-08	UBL4A	8266	1.20023e-08	943	1018	737	489	367	367
1928	ENSG00000164543	319.446	1.21384	0.199175	6.09431	1.09908e-09	1.15695e-08	STK17A	9263	1.21318e-08	189	192	197	371	554	414
1929	ENSG00000131378	95.4712	1.70177	0.279311	6.09276	1.10977e-09	1.16731e-08	RFTN1	23180	1.22405e-08	52	45	38	125	130	184
1930	ENSG00000055070	1094.19	-1.01867	0.167194	-6.09272	1.11008e-09	1.16731e-08	SZRD1	26099	1.22405e-08	1461	1667	1268	832	696	641
1931	ENSG00000088812	1040.47	0.954843	0.156733	6.09214	1.11408e-09	1.17091e-08	ATRN	8455	1.22782e-08	819	676	628	1267	1386	1466
1932	ENSG00000107897	708.57	1.00348	0.164722	6.09195	1.11545e-09	1.17174e-08	ACBD5	91452	1.22869e-08	515	466	434	816	947	1075
1933	ENSG00000100284	367.774	-1.11646	0.183314	-6.09041	1.12622e-09	1.18244e-08	TOM1	10043	1.23991e-08	468	446	596	256	214	225
1934	ENSG00000099284	330.522	-1.05347	0.173019	-6.08877	1.1378e-09	1.19398e-08	H2AFY2	55506	1.25201e-08	408	451	480	240	199	206
1935	ENSG00000170385	903.238	0.956988	0.157205	6.08752	1.14676e-09	1.20277e-08	SLC30A1	7779	1.26122e-08	662	628	552	1302	1038	1237
1936	ENSG00000100997	984.197	-0.979794	0.160977	-6.08653	1.15382e-09	1.20955e-08	ABHD12	26090	1.26833e-08	1375	1352	1191	779	611	596
1937	ENSG00000236603	584.668	-0.94826	0.155813	-6.0859	1.1584e-09	1.21372e-08	RANP1	NA	1.27271e-08	711	871	729	405	411	382
1938	ENSG00000270015	46.902	2.22809	0.366131	6.08551	1.16118e-09	1.216e-08	RP11-540B6.6	NA	1.2751e-08	13	14	23	70	76	86
1939	ENSG00000142784	226.238	-1.24792	0.205105	-6.08427	1.17024e-09	1.22486e-08	WDTC1	23038	1.28439e-08	350	276	330	160	116	125
1940	ENSG00000012983	304.547	1.39593	0.22948	6.08299	1.17963e-09	1.23405e-08	MAP4K5	11183	1.29403e-08	175	208	120	387	537	400
1941	ENSG00000099783	2289.26	-0.813935	0.133819	-6.08237	1.1842e-09	1.2382e-08	HNRNPM	4670	1.29837e-08	3022	2979	2755	1822	1566	1591
1942	ENSG00000157168	313.217	1.47969	0.24333	6.08102	1.19421e-09	1.24802e-08	NRG1	3084	1.30867e-08	141	198	158	424	622	337
1943	ENSG00000125877	694.345	-1.13027	0.185942	-6.0786	1.21238e-09	1.26635e-08	ITPA	3704	1.3279e-08	878	1002	980	546	409	350
1944	ENSG00000093010	492.695	-1.42361	0.234209	-6.07839	1.21398e-09	1.26737e-08	COMT	100616414	1.32897e-08	646	807	701	355	275	172
1945	ENSG00000105379	352.109	-1.22044	0.200788	-6.07825	1.21499e-09	1.26778e-08	ETFB	2109	1.3294e-08	488	428	563	261	197	177
1946	ENSG00000187498	1195.31	1.29561	0.213181	6.07752	1.22052e-09	1.27289e-08	COL4A1	1282	1.33476e-08	722	869	485	2001	1655	1440
1947	ENSG00000124702	305.201	-1.21207	0.199484	-6.07602	1.23204e-09	1.28425e-08	KLHDC3	116138	1.34666e-08	417	478	384	227	161	164
1948	ENSG00000186814	70.8987	2.12647	0.350075	6.07432	1.24511e-09	1.2972e-08	ZSCAN30	100101467	1.36025e-08	16	29	36	82	132	131
1949	ENSG00000153317	796.71	1.05458	0.173662	6.07261	1.25845e-09	1.30994e-08	ASAP1	50807	1.37361e-08	522	586	446	947	1255	1025
1950	ENSG00000107281	222.909	-1.43078	0.235613	-6.07259	1.25863e-09	1.30994e-08	NPDC1	56654	1.37361e-08	351	295	331	163	88	110
1951	ENSG00000173801	3126.55	-1.29207	0.212775	-6.07244	1.25978e-09	1.31047e-08	JUP	3728	1.37416e-08	4419	4488	4413	2377	1873	1189
1952	ENSG00000116675	162.982	1.3649	0.224779	6.0722	1.26173e-09	1.31183e-08	DNAJC6	9829	1.37558e-08	106	92	75	201	261	243
1953	ENSG00000110090	1163.89	-0.964912	0.158913	-6.07195	1.26367e-09	1.31317e-08	CPT1A	1374	1.37699e-08	1612	1311	1695	824	840	701
1954	ENSG00000108604	532.323	-0.93339	0.15373	-6.07162	1.26626e-09	1.31518e-08	SMARCD2	6603	1.3791e-08	719	708	670	403	363	332
1955	ENSG00000145982	152.544	-1.24038	0.204332	-6.0704	1.27593e-09	1.32455e-08	FARS2	10667	1.38893e-08	207	234	202	89	92	92
1956	ENSG00000236144	119.438	1.49668	0.246598	6.06932	1.2845e-09	1.33276e-08	TMEM147-AS1	100506469	1.39754e-08	55	63	70	173	148	208
1957	ENSG00000205213	2084.38	0.976344	0.160873	6.06903	1.28683e-09	1.3345e-08	LGR4	55366	1.39936e-08	1580	1242	1392	2470	2611	3211
1958	ENSG00000115464	1140.49	1.06555	0.175615	6.06755	1.29875e-09	1.34618e-08	USP34	9736	1.4116e-08	800	739	673	1208	1720	1704
1959	ENSG00000172269	626.016	-0.898645	0.148113	-6.0673	1.30081e-09	1.34762e-08	DPAGT1	1798	1.41312e-08	899	763	782	432	439	441
1960	ENSG00000119402	654.115	1.09646	0.18073	6.06685	1.30446e-09	1.35072e-08	FBXW2	26190	1.41637e-08	484	416	350	762	903	1010
1961	ENSG00000164031	208.337	1.31275	0.216394	6.0665	1.3073e-09	1.35297e-08	DNAJB14	79982	1.41872e-08	123	113	122	260	261	371
1962	ENSG00000184990	451.432	-1.55878	0.256976	-6.06585	1.31259e-09	1.35724e-08	SIVA1	10572	1.4232e-08	643	781	599	343	162	180
1963	ENSG00000088305	110.386	1.61385	0.266058	6.0658	1.31302e-09	1.35724e-08	DNMT3B	1789	1.4232e-08	53	66	44	162	137	200
1964	ENSG00000100324	245.511	-1.22257	0.201553	-6.06575	1.31343e-09	1.35724e-08	TAB1	10454	1.4232e-08	335	386	311	177	139	126
1965	ENSG00000103051	780.143	-0.89174	0.147027	-6.06515	1.3183e-09	1.36157e-08	COG4	25839	1.42775e-08	1065	1048	928	587	548	505
1966	ENSG00000130706	576.477	-1.57586	0.25983	-6.06496	1.31983e-09	1.36246e-08	ADRM1	11047	1.42868e-08	822	949	820	448	207	213
1967	ENSG00000205155	274.51	-1.07268	0.176895	-6.06394	1.32824e-09	1.37044e-08	PSENEN	55851	1.43705e-08	330	381	405	184	171	176
1968	ENSG00000125912	892.353	-1.38727	0.228823	-6.06261	1.33926e-09	1.38112e-08	NCLN	56926	1.44824e-08	1389	1419	1066	693	416	371
1969	ENSG00000146858	45.2276	2.18167	0.35995	6.06104	1.35241e-09	1.39396e-08	ZC3HAV1L	92092	1.46171e-08	19	17	13	71	73	78
1970	ENSG00000166508	2152.24	-1.28313	0.211755	-6.0595	1.36548e-09	1.40672e-08	MCM7	4176	1.47509e-08	3142	3666	2345	1622	1013	1125
1971	ENSG00000107036	304.141	1.34481	0.221942	6.05928	1.36736e-09	1.40794e-08	RIC1	57589	1.47637e-08	209	176	130	348	456	506
1972	ENSG00000054392	64.2306	1.82418	0.301313	6.0541	1.41202e-09	1.45319e-08	HHAT	55733	1.52382e-08	31	23	31	95	99	107
1973	ENSG00000095564	499.824	1.17453	0.194042	6.05295	1.42215e-09	1.46287e-08	BTAF1	9044	1.53397e-08	371	288	261	572	776	732
1974	ENSG00000142676	4962.97	-0.844365	0.139539	-6.05109	1.43867e-09	1.47911e-08	RPL11	6135	1.551e-08	6058	6536	6532	3729	3850	3073
1975	ENSG00000181619	29.4809	3.04415	0.503207	6.04949	1.45301e-09	1.4931e-08	GPR135	64582	1.56567e-08	4	8	7	41	56	61
1976	ENSG00000280385	80.4103	1.9592	0.323908	6.04862	1.4609e-09	1.50045e-08	AP000648.5	NA	1.57338e-08	44	27	27	93	126	165
1977	ENSG00000175309	176.632	1.22966	0.203311	6.04818	1.46489e-09	1.50379e-08	PHYKPL	85007	1.57688e-08	113	105	98	228	238	277
1978	ENSG00000232931	23.8787	3.73113	0.617125	6.04598	1.48505e-09	1.52372e-08	LINC00342	NA	1.59778e-08	4	3	2	43	39	51
1979	ENSG00000181031	277.034	-1.08125	0.178884	-6.04443	1.49935e-09	1.53761e-08	RPH3AL	9501	1.61234e-08	374	354	401	200	173	160
1980	ENSG00000114767	236.03	-1.31709	0.217944	-6.04326	1.51033e-09	1.54809e-08	RRP9	9136	1.62333e-08	326	404	281	164	116	126
1981	ENSG00000189171	217.122	-1.3085	0.2166	-6.04107	1.53092e-09	1.5684e-08	S100A13	6284	1.64462e-08	298	258	372	119	109	147
1982	ENSG00000122484	235.409	1.23355	0.204256	6.03923	1.54852e-09	1.58543e-08	RPAP2	79871	1.66249e-08	134	135	153	269	341	382
1983	ENSG00000100142	398.835	-1.3899	0.230147	-6.03917	1.54911e-09	1.58543e-08	POLR2F	5435	1.66249e-08	540	596	596	295	220	145
1984	ENSG00000178719	1182.32	-0.951896	0.157651	-6.03801	1.56028e-09	1.59606e-08	GRINA	2907	1.67363e-08	1544	1636	1497	950	700	768
1985	ENSG00000100647	163.316	1.31113	0.217159	6.03766	1.56367e-09	1.59825e-08	SUSD6	9766	1.67593e-08	84	99	98	226	269	203
1986	ENSG00000110344	368.944	1.14511	0.189662	6.03762	1.56399e-09	1.59825e-08	UBE4A	9354	1.67593e-08	240	249	200	416	572	537
1987	ENSG00000123064	829.197	-1.30169	0.215664	-6.03574	1.58236e-09	1.61621e-08	DDX54	79039	1.69476e-08	1226	1305	1009	650	419	366
1988	ENSG00000197858	1233.37	-1.36047	0.225416	-6.03537	1.58601e-09	1.61911e-08	GPAA1	8733	1.69781e-08	1989	1898	1440	959	596	519
1989	ENSG00000134897	56.0183	2.04954	0.339604	6.03508	1.58886e-09	1.62121e-08	BIVM	54841	1.70001e-08	30	17	18	84	87	100
1990	ENSG00000008441	137.613	-1.36857	0.226853	-6.03286	1.61081e-09	1.64278e-08	NFIX	4784	1.72263e-08	199	207	190	92	77	62
1991	ENSG00000227097	249.421	-1.90817	0.31647	-6.02954	1.64429e-09	1.67609e-08	RPS28P7	NA	1.75755e-08	379	404	399	178	80	56
1992	ENSG00000099804	380.018	-1.31081	0.217415	-6.02904	1.64937e-09	1.68042e-08	CDC34	997	1.76209e-08	495	589	542	295	184	175
1993	ENSG00000137207	531.429	-0.940335	0.15598	-6.02855	1.65442e-09	1.68472e-08	YIPF3	25844	1.7666e-08	690	633	774	381	349	362
1994	ENSG00000166012	662.634	1.26367	0.209624	6.02825	1.65749e-09	1.687e-08	TAF1D	100302240	1.769e-08	326	313	531	864	924	1019
1995	ENSG00000254858	166.927	-1.38062	0.229069	-6.02709	1.66933e-09	1.6982e-08	MPV17L2	84769	1.78074e-08	257	258	209	116	87	74
1996	ENSG00000235142	142.711	1.71951	0.285385	6.02523	1.6887e-09	1.71704e-08	RP1-60O19.1	100422737	1.8005e-08	66	56	77	148	210	299
1997	ENSG00000008710	205.259	1.64965	0.273886	6.02313	1.71079e-09	1.73863e-08	PKD1	102465429	1.82313e-08	79	127	92	435	239	259
1998	ENSG00000102081	303.878	1.00498	0.166879	6.02221	1.72048e-09	1.74761e-08	FMR1	2332	1.83255e-08	196	212	198	402	388	427
1999	ENSG00000005801	297.94	1.19651	0.198697	6.02179	1.72496e-09	1.75128e-08	ZNF195	7748	1.8364e-08	168	172	203	333	439	473
[truncated: 56,736 more rows]
