# Supplementary material for: A Non-Genetic, Cell Cycle Dependent Mechanism of Platinum Resistance in Lung Adenocarcinoma
Source: bioRxiv preprint, doi:10.1101/2020.11.26.400499, version 2 (2021-05-05)
Supplement: Supplement Table 4 [file 400499_file24.xlsx]

## Sheet: Cisplatin Big vs Small 
	Row.names	baseMean	log2FoldChange	lfcSE	stat	pvalue	padj	symbol	entrez	qValue	Big#1	Big#2	Big#3	Small#1	Small#2	Small#3
4103	ENSG00000169509	5.53099	-5.15933	1.45114	-3.55537	0.000377446	0.00163305	CRCT1	54544	0.00283871	5	14	14	1	0	0
5906	ENSG00000223416	2.28392	-4.88341	1.79191	-2.72525	0.00642523	NA	RPS26P15	NA	0.0335709	5	1	8	0	0	0
6353	ENSG00000270403	1.91691	-4.62889	1.80253	-2.56799	0.010229	NA	RP11-35P15.1	NA	0.0496844	5	4	3	0	0	0
5373	ENSG00000259993	3.58585	-4.51614	1.53477	-2.94256	0.00325512	0.0107547	RP11-261B23.1	NA	0.0186947	9	7	5	1	0	0
7329	ENSG00000205076	1.53771	-4.31009	1.92684	-2.23687	0.0252947	NA	LGALS7	653499	0.106489	3	4	2	0	0	0
8225	ENSG00000213538	1.53423	-4.30743	2.17044	-1.98459	0.0471904	NA	KRT8P41	NA	0.177046	0	2	7	0	0	0
7615	ENSG00000256045	1.52552	-4.3008	1.98722	-2.16423	0.0304469	NA	MTRNR2L10	100463488	0.123379	2	1	6	0	0	0
8461	ENSG00000154764	1.51366	-4.29064	2.23007	-1.92399	0.0543559	NA	WNT7A	7476	0.198241	8	0	1	0	0	0
6501	ENSG00000125780	3.00767	-4.24571	1.6909	-2.51091	0.012042	0.0329131	TGM3	7053	0.0571594	12	4	1	0	0	1
6601	ENSG00000285632	2.85811	-4.17083	1.68528	-2.47485	0.0133291	0.0358785	NA	NA	0.0623103	2	12	2	1	0	0
8087	ENSG00000229368	1.34968	-4.12107	2.03635	-2.02376	0.0429954	NA	AC090587.4	NA	0.164055	1	4	3	0	0	0
7992	ENSG00000178934	1.34863	-4.12012	2.00894	-2.05089	0.0402773	NA	LGALS7B	653499	0.155496	2	4	2	0	0	0
7993	ENSG00000270916	1.34863	-4.12012	2.00894	-2.05089	0.0402773	NA	RPL12P50	NA	0.155496	2	4	2	0	0	0
8827	ENSG00000226789	1.33887	-4.1115	2.24835	-1.82867	0.0674486	NA	AC110926.4	NA	0.235791	6	2	0	0	0	0
8171	ENSG00000213478	1.3333	-4.10687	2.0529	-2.00052	0.0454441	NA	CFL1P2	NA	0.171621	5	1	2	0	0	0
8867	ENSG00000242083	1.32563	-4.09937	2.2533	-1.81927	0.0688699	NA	RPL7AP31	NA	0.239674	6	0	2	0	0	0
525	ENSG00000160180	51.7978	-4.05665	0.561731	-7.22169	5.13454e-13	1.73616e-11	TFF3	7033	3.01794e-11	39	144	111	6	10	2
6567	ENSG00000129910	2.6328	-4.04946	1.62669	-2.48938	0.0127965	0.0346232	CDH15	1013	0.06013	5	6	5	1	0	0
6690	ENSG00000268262	2.63071	-4.04855	1.65284	-2.44945	0.0143074	0.0380043	CTC-246B18.8	NA	0.0659932	7	6	2	1	0	0
6897	ENSG00000202354	2.62932	-4.04796	1.70383	-2.3758	0.0175109	0.0451244	RNY3	6085	0.0783367	1	5	9	1	0	0
6614	ENSG00000211452	2.62409	-4.04556	1.63717	-2.47107	0.0134709	0.0361889	DIO1	1733	0.0628494	7	5	3	1	0	0
6685	ENSG00000258828	2.62611	-4.04207	1.64935	-2.45071	0.0142575	0.0379005	KRT8P2	NA	0.0658128	8	4	3	0	1	0
2508	ENSG00000228462	12.1583	-4.02412	0.887113	-4.5362	5.72758e-06	4.05407e-05	RP11-445N18.3	NA	7.04712e-05	22	11	37	1	2	2
5548	ENSG00000189280	4.65126	-3.97459	1.38715	-2.86529	0.0041663	0.013331	GJB5	2709	0.023173	17	4	6	1	1	0
7036	ENSG00000279928	2.42073	-3.92434	1.68094	-2.33461	0.0195639	0.0494586	FO538757.2	107984078	0.0858019	7	2	5	1	0	0
9486	ENSG00000213269	1.15746	-3.89952	2.33108	-1.67284	0.0943588	NA	AC004386.4	NA	0.30695	3	4	0	0	0	0
8850	ENSG00000228355	1.15293	-3.89472	2.13635	-1.82307	0.0682929	NA	BX322559.3	NA	0.238095	1	2	3	0	0	0
8851	ENSG00000267024	1.15293	-3.89472	2.13635	-1.82307	0.0682929	NA	CTD-2588C8.8	NA	0.238095	1	2	3	0	0	0
8862	ENSG00000182557	1.15084	-3.8926	2.13714	-1.82141	0.0685449	NA	SPNS3	201305	0.238677	3	2	1	0	0	0
8879	ENSG00000213279	1.14527	-3.88701	2.13925	-1.81699	0.0692181	NA	RP1-29C18.9	NA	0.24056	2	1	3	0	0	0
9014	ENSG00000253846	1.14318	-3.88479	2.18012	-1.78191	0.0747632	NA	PCDHGA10	56106	0.25594	5	1	1	0	0	0
9733	ENSG00000272138	1.1397	-3.88065	2.40012	-1.61685	0.10591	NA	LINC01607	101927067	0.335782	1	0	6	0	0	0
9547	ENSG00000285215	1.1376	-3.87856	2.34088	-1.65688	0.097543	NA	NA	NA	0.315281	3	0	3	0	0	0
5	ENSG00000170373	196.778	-3.82804	0.290688	-13.1689	1.32553e-39	4.45454e-36	CST1	1469	7.74325e-36	287	482	334	25	20	33
7323	ENSG00000167912	2.26983	-3.81193	1.70283	-2.23858	0.025183	NA	RP11-25K19.1	NA	0.106117	2	6	5	0	0	1
7302	ENSG00000224060	2.25346	-3.80326	1.6934	-2.24593	0.0247082	NA	ARSEP1	NA	0.104405	6	4	3	0	0	1
7561	ENSG00000249602	2.24022	-3.79602	1.74167	-2.17953	0.0292924	NA	RP11-98D18.3	NA	0.119548	6	1	6	0	0	1
9438	ENSG00000180785	20.5094	-3.75619	2.23044	-1.68406	0.0921695	0.176638	OR51E1	143503	0.301353	0	83	32	3	0	5
97	ENSG00000157613	97.3325	-3.71199	0.40096	-9.25775	2.08776e-20	3.82082e-18	CREB3L1	90993	6.64167e-18	129	279	135	10	20	12
7932	ENSG00000240371	2.06445	-3.6704	1.77405	-2.06894	0.0385517	NA	RPS4XP13	NA	0.149968	6	5	1	0	1	0
7981	ENSG00000283167	2.05233	-3.66899	1.78611	-2.05417	0.0399589	NA	RP11-1223D19.6	NA	0.154499	1	4	7	1	0	0
7829	ENSG00000143001	2.04814	-3.66652	1.74422	-2.1021	0.0355445	NA	TMEM61	199964	0.140099	6	4	2	1	0	0
8810	ENSG00000198021	2.03072	-3.65514	1.99683	-1.83047	0.0671795	NA	SPANXA1	728712	0.235277	10	1	0	1	0	0
8811	ENSG00000203926	2.03072	-3.65514	1.99683	-1.83047	0.0671795	NA	SPANXA2	728712	0.235277	10	1	0	1	0	0
10443	ENSG00000233947	0.970476	-3.6439	2.47397	-1.4729	0.140778	NA	RP11-336N8.2	NA	0.415946	0	4	2	0	0	0
10444	ENSG00000266563	0.970476	-3.6439	2.47397	-1.4729	0.140778	NA	EIF1P5	NA	0.415946	0	4	2	0	0	0
9838	ENSG00000106633	0.969429	-3.64208	2.28222	-1.59585	0.110523	NA	GCK	2645	0.346666	1	4	1	0	0	0
9760	ENSG00000234683	0.96281	-3.6341	2.25724	-1.60998	0.107403	NA	RP5-837I24.5	NA	0.33954	1	2	2	0	0	0
9761	ENSG00000267541	0.96281	-3.6341	2.25724	-1.60998	0.107403	NA	MTCO2P2	NA	0.33954	1	2	2	0	0	0
9767	ENSG00000257108	0.961763	-3.63284	2.2578	-1.60902	0.107612	NA	NHLRC4	283948	0.339991	2	2	1	0	0	0
10633	ENSG00000205106	0.957239	-3.62727	2.52469	-1.43672	0.150798	NA	DKFZp779M0652	374387	0.437631	0	1	5	0	0	0
9894	ENSG00000148357	0.956192	-3.62615	2.28935	-1.58392	0.113212	NA	HMCN2	256158	0.353092	1	1	3	0	0	0
9797	ENSG00000275834	0.955145	-3.62492	2.26135	-1.60298	0.108938	NA	RP11-440E5.1	NA	0.343091	2	1	2	0	0	0
9798	ENSG00000283408	0.955145	-3.62492	2.26135	-1.60298	0.108938	NA	RP1-242N11.1	NA	0.343091	2	1	2	0	0	0
9903	ENSG00000180834	0.954098	-3.6236	2.29049	-1.58201	0.113646	NA	MAP6D1	79929	0.354053	3	1	1	0	0	0
9904	ENSG00000249502	0.954098	-3.6236	2.29049	-1.58201	0.113646	NA	AC006160.5	NA	0.354053	3	1	1	0	0	0
9905	ENSG00000272112	0.954098	-3.6236	2.29049	-1.58201	0.113646	NA	CTB-113P19.5	NA	0.354053	3	1	1	0	0	0
11559	ENSG00000226051	0.95062	-3.61834	2.83168	-1.2778	0.201318	NA	ZNF503-AS1	253264	0.537441	0	0	6	0	0	0
10690	ENSG00000250244	0.949573	-3.61749	2.53003	-1.42982	0.152769	NA	CTB-49A3.4	NA	0.440986	1	0	5	0	0	0
10561	ENSG00000213791	0.948527	-3.61625	2.48899	-1.4529	0.146252	NA	RP11-941H19.2	NA	0.42729	2	0	3	0	0	0
10562	ENSG00000239809	0.948527	-3.61625	2.48899	-1.4529	0.146252	NA	RP11-51L5.2	NA	0.42729	2	0	3	0	0	0
8234	ENSG00000243083	1.86778	-3.52173	1.77879	-1.97985	0.0477206	NA	LINC00870	201617	0.178839	2	5	3	1	0	0
8327	ENSG00000226943	1.86423	-3.51323	1.79521	-1.957	0.0503475	NA	ALG1L5P	NA	0.186577	2	2	6	0	1	0
8337	ENSG00000238150	1.85454	-3.51323	1.79715	-1.95488	0.0505968	NA	AC008753.3	NA	0.187276	2	2	6	1	0	0
8252	ENSG00000253102	1.86868	-3.51258	1.77715	-1.97653	0.0480951	NA	RP1-117B12.4	NA	0.17985	3	2	5	0	0	1
8328	ENSG00000264462	1.86659	-3.51118	1.79442	-1.95672	0.0503805	NA	MIR3648-2	103504731	0.186654	6	2	2	0	0	1
8329	ENSG00000275708	1.86659	-3.51118	1.79442	-1.95672	0.0503805	NA	MIR3648-1	100500862	0.186654	6	2	2	0	0	1
4189	ENSG00000284948	6.90472	-3.50481	0.99911	-3.50793	0.000451602	0.00191378	NA	NA	0.0033267	10	15	13	2	1	1
4485	ENSG00000265936	6.8671	-3.49884	1.03973	-3.36513	0.00076508	0.00302825	RP11-563H6.1	NA	0.00526396	8	8	22	2	1	1
4365	ENSG00000255328	6.73083	-3.44969	1.00759	-3.4237	0.000617738	0.00251228	RP11-326C3.12	NA	0.00436705	9	15	13	1	1	2
3710	ENSG00000267795	8.17001	-3.41724	0.904625	-3.77752	0.000158396	0.000757909	SMIM22	440335	0.00131746	15	13	17	2	2	1
4326	ENSG00000230291	7.76029	-3.35564	0.975139	-3.44119	0.000579159	0.00237661	RP11-244J10.1	NA	0.00413123	11	11	21	3	0	1
8813	ENSG00000284059	1.69284	-3.35373	1.83233	-1.8303	0.0672044	NA	NA	NA	0.235294	2	5	2	0	0	1
3913	ENSG00000134240	14.4986	-3.34856	0.917304	-3.65044	0.000261791	0.0011876	HMGCS2	3158	0.00206439	5	46	29	0	2	6
156	ENSG00000160182	216.36	-3.3471	0.3814	-8.77583	1.69655e-18	1.93059e-16	TFF1	7031	3.35591e-16	150	574	459	40	37	40
9017	ENSG00000227304	1.66547	-3.34496	1.87763	-1.78148	0.0748343	NA	RP11-791G16.2	NA	0.256098	1	2	6	1	0	0
8814	ENSG00000241269	1.66337	-3.34348	1.82681	-1.83023	0.067215	NA	AC093620.5	NA	0.235294	3	2	3	1	0	0
8815	ENSG00000243445	1.66337	-3.34348	1.82681	-1.83023	0.067215	NA	RP11-715J22.1	NA	0.235294	3	2	3	1	0	0
11834	ENSG00000228697	0.780351	-3.32813	2.69233	-1.23615	0.216402	NA	RP5-968D22.3	NA	0.564189	0	4	1	0	0	0
11835	ENSG00000233929	0.780351	-3.32813	2.69233	-1.23615	0.216402	NA	MT1XP1	NA	0.564189	0	4	1	0	0	0
11844	ENSG00000113492	0.779305	-3.3265	2.69337	-1.23507	0.216805	NA	AGXT2	64902	0.564856	1	4	0	0	0	0
11792	ENSG00000272913	0.773733	-3.31778	2.6693	-1.24294	0.21389	NA	RP11-440D17.3	NA	0.559673	0	2	2	0	0	0
11793	ENSG00000276380	0.773733	-3.31778	2.6693	-1.24294	0.21389	NA	UBE2NL	389898	0.559673	0	2	2	0	0	0
5400	ENSG00000188257	7.88453	-3.31777	1.13311	-2.92802	0.00341125	0.0112142	PLA2G2A	5320	0.0194934	1	21	21	0	1	4
11092	ENSG00000186847	0.772686	-3.31579	2.44433	-1.35652	0.174932	NA	KRT14	3861	0.486575	1	2	1	0	0	0
11093	ENSG00000273254	0.772686	-3.31579	2.44433	-1.35652	0.174932	NA	RP1-100J12.1	NA	0.486575	1	2	1	0	0	0
11094	ENSG00000279281	0.772686	-3.31579	2.44433	-1.35652	0.174932	NA	RP11-226M10.3	NA	0.486575	1	2	1	0	0	0
11803	ENSG00000227034	0.771639	-3.3145	2.6714	-1.24074	0.214703	NA	RP11-234N17.1	NA	0.561276	2	2	0	0	0	0
11804	ENSG00000231416	0.771639	-3.3145	2.6714	-1.24074	0.214703	NA	RP11-422P24.9	NA	0.561276	2	2	0	0	0	0
11919	ENSG00000179284	0.767115	-3.30745	2.7056	-1.22245	0.221539	NA	DAND5	199699	0.573414	0	1	3	0	0	0
11920	ENSG00000186466	0.767115	-3.30745	2.7056	-1.22245	0.221539	NA	AQP7P1	NA	0.573414	0	1	3	0	0	0
11921	ENSG00000235123	0.767115	-3.30745	2.7056	-1.22245	0.221539	NA	DSCAM-AS1	100506492	0.573414	0	1	3	0	0	0
11922	ENSG00000283428	0.767115	-3.30745	2.7056	-1.22245	0.221539	NA	RP11-811O14.1	NA	0.573414	0	1	3	0	0	0
11122	ENSG00000197768	0.766068	-3.30593	2.44967	-1.34954	0.177165	NA	STPG3	441476	0.491367	1	1	2	0	0	0
11123	ENSG00000208892	0.766068	-3.30593	2.44967	-1.34954	0.177165	NA	SNORA49	677829	0.491367	1	1	2	0	0	0
11124	ENSG00000241511	0.766068	-3.30593	2.44967	-1.34954	0.177165	NA	RPS15AP24	NA	0.491367	1	1	2	0	0	0
11125	ENSG00000271268	0.766068	-3.30593	2.44967	-1.34954	0.177165	NA	AC015849.14	NA	0.491367	1	1	2	0	0	0
11126	ENSG00000273139	0.766068	-3.30593	2.44967	-1.34954	0.177165	NA	XXbac-B444P24.14	NA	0.491367	1	1	2	0	0	0
11129	ENSG00000169253	0.765021	-3.30435	2.45053	-1.34842	0.177522	NA	RP11-220D10.1	NA	0.492094	2	1	1	0	0	0
11130	ENSG00000180279	0.765021	-3.30435	2.45053	-1.34842	0.177522	NA	MGC45922	284365	0.492094	2	1	1	0	0	0
11131	ENSG00000204971	0.765021	-3.30435	2.45053	-1.34842	0.177522	NA	RP11-807H22.7	NA	0.492094	2	1	1	0	0	0
11132	ENSG00000269985	0.765021	-3.30435	2.45053	-1.34842	0.177522	NA	RP1-232P20.1	101927972	0.492094	2	1	1	0	0	0
5888	ENSG00000134193	6.15343	-3.29738	1.20649	-2.73304	0.00627521	0.0189184	REG4	83998	0.0328856	1	12	21	1	0	3
11961	ENSG00000082929	0.759449	-3.29533	2.71346	-1.21444	0.22458	NA	LINC01587	10141	0.579158	1	0	3	0	0	0
11962	ENSG00000249222	0.759449	-3.29533	2.71346	-1.21444	0.22458	NA	ATP5L2	267020	0.579158	1	0	3	0	0	0
11963	ENSG00000266640	0.759449	-3.29533	2.71346	-1.21444	0.22458	NA	MIR4754	100616168	0.579158	1	0	3	0	0	0
11964	ENSG00000280040	0.759449	-3.29533	2.71346	-1.21444	0.22458	NA	RP11-296E3.2	NA	0.579158	1	0	3	0	0	0
11890	ENSG00000225867	0.758402	-3.29375	2.67858	-1.22966	0.218823	NA	RP5-1177I5.3	NA	0.567719	2	0	2	0	0	0
11891	ENSG00000226856	0.758402	-3.29375	2.67858	-1.22966	0.218823	NA	AC093901.1	NA	0.567719	2	0	2	0	0	0
11892	ENSG00000240759	0.758402	-3.29375	2.67858	-1.22966	0.218823	NA	RP11-25I15.1	NA	0.567719	2	0	2	0	0	0
11893	ENSG00000256618	0.758402	-3.29375	2.67858	-1.22966	0.218823	NA	MTRNR2L1	100462977	0.567719	2	0	2	0	0	0
11894	ENSG00000258501	0.758402	-3.29375	2.67858	-1.22966	0.218823	NA	EIF3LP1	NA	0.567719	2	0	2	0	0	0
11987	ENSG00000153283	0.757356	-3.29199	2.71563	-1.21224	0.225422	NA	CD96	10225	0.580166	3	0	1	0	0	0
11988	ENSG00000236764	0.757356	-3.29199	2.71563	-1.21224	0.225422	NA	COX7A2P2	NA	0.580166	3	0	1	0	0	0
11989	ENSG00000250511	0.757356	-3.29199	2.71563	-1.21224	0.225422	NA	RP11-380D23.1	NA	0.580166	3	0	1	0	0	0
2678	ENSG00000248144	19.4917	-3.25188	0.735413	-4.42184	9.7865e-06	6.4873e-05	ADH1C	126	0.000112768	10	59	37	1	5	5
7950	ENSG00000236281	3.00858	-3.2428	1.57076	-2.06448	0.0389719	0.0874847	NDUFB9P2	NA	0.15127	1	9	6	0	0	2
1572	ENSG00000243955	20.6995	-3.23719	0.598232	-5.41126	6.2582e-08	7.06715e-07	GSTA1	2938	1.22847e-06	29	50	33	2	4	6
628	ENSG00000169562	72.503	-3.234	0.465375	-6.94925	3.6724e-12	1.0381e-10	GJB1	2705	1.8045e-10	59	197	137	6	16	19
5372	ENSG00000200795	8.44799	-3.20826	1.09021	-2.94278	0.00325275	0.0107488	RNU4-1	26835	0.0186845	3	6	37	3	2	0
4320	ENSG00000202538	12.792	-3.20087	0.929004	-3.44549	0.000570035	0.00234242	RNU4-2	26834	0.00407179	3	25	41	2	5	0
9583	ENSG00000213228	1.49827	-3.1645	1.92056	-1.6477	0.0994147	NA	RPL12P38	NA	0.320123	1	5	2	0	1	0
7840	ENSG00000283283	2.77025	-3.16388	1.50729	-2.09905	0.0358125	0.081516	RP11-1223D19.5	NA	0.140957	2	5	8	1	1	0
4553	ENSG00000171747	116.233	-3.16302	0.94978	-3.33027	0.000867627	0.00338285	LGALS4	3960	0.00588035	37	342	248	17	12	41
10102	ENSG00000225475	1.48301	-3.16023	2.05823	-1.53541	0.124683	NA	RP11-377K22.2	NA	0.380829	0	4	5	1	0	0
9570	ENSG00000213087	1.48196	-3.15903	1.91357	-1.65085	0.0987682	NA	RP11-613F7.1	NA	0.318473	1	4	3	1	0	0
4733	ENSG00000225093	7.0451	-3.15817	0.972521	-3.24741	0.00116461	0.0043681	RPL3P7	NA	0.007593	10	11	17	0	3	2
9493	ENSG00000254941	1.48091	-3.15812	1.88976	-1.67118	0.0946869	NA	RP11-677M14.5	NA	0.30778	2	4	2	1	0	0
1801	ENSG00000142530	20.7716	-3.15563	0.610383	-5.16991	2.34208e-07	2.30853e-06	FAM71E1	112703	4.01288e-06	36	50	26	6	1	5
8032	ENSG00000207142	2.77679	-3.15534	1.5478	-2.03859	0.0414909	0.0922412	Y_RNA	NA	0.159403	1	5	9	1	0	1
10195	ENSG00000105352	1.47639	-3.15449	2.07805	-1.51801	0.129013	NA	CEACAM4	1089	0.390493	0	2	6	1	0	0
9608	ENSG00000236773	1.48503	-3.15359	1.92292	-1.64	0.101004	NA	RP11-365O16.1	NA	0.324396	1	2	5	0	1	0
9588	ENSG00000213942	1.48182	-3.14641	1.91192	-1.64568	0.0998288	NA	RP1-102E24.1	NA	0.321289	3	1	3	0	0	1
9631	ENSG00000272115	1.48077	-3.1455	1.92309	-1.63565	0.101913	NA	GS1-393G12.14	NA	0.326532	5	1	2	0	0	1
9637	ENSG00000258561	1.47527	-3.14549	1.92469	-1.63429	0.102199	NA	RP11-72M17.1	NA	0.327244	5	1	2	0	1	0
6762	ENSG00000212829	4.03707	-3.14511	1.29838	-2.42235	0.0154207	0.0405312	RPS26P3	NA	0.0703714	6	6	10	2	0	0
10244	ENSG00000232858	1.46106	-3.14104	2.08167	-1.50891	0.131323	NA	RPL34P27	NA	0.395583	2	0	6	1	0	0
7884	ENSG00000232188	2.78544	-3.13728	1.50255	-2.08797	0.0368003	0.0832946	RP11-312J18.6	NA	0.144037	2	5	8	0	1	1
10445	ENSG00000267737	1.45687	-3.1371	2.1302	-1.47268	0.140837	NA	AC061992.2	NA	0.416042	7	0	1	1	0	0
8426	ENSG00000232629	2.75276	-3.13244	1.62061	-1.93288	0.0532509	0.113079	HLA-DQB2	3120	0.195001	10	1	3	0	2	0
1392	ENSG00000263740	55.2899	-3.09868	0.55105	-5.62323	1.8742e-08	2.39014e-07	RN7SL4P	NA	4.15474e-07	62	65	170	19	14	2
8571	ENSG00000284740	2.59134	-3.08256	1.62708	-1.89453	0.0581543	0.121683	NA	NA	0.209372	1	8	5	2	0	0
7582	ENSG00000124469	3.81733	-3.06307	1.40964	-2.17295	0.0297839	0.0699832	CEACAM8	1088	0.121217	9	1	10	2	0	0
6586	ENSG00000267890	3.8631	-3.03196	1.22334	-2.47843	0.0131963	0.0356018	CTD-2126E3.4	NA	0.0618297	8	5	8	1	1	1
31	ENSG00000117472	147.365	-3.0259	0.287482	-10.5255	6.58932e-26	3.77334e-23	TSPAN1	10103	6.55914e-23	233	312	243	20	41	36
4582	ENSG00000224846	8.85301	-3.0114	0.907849	-3.31707	0.00090967	0.00352433	RP1-90J20.8	NA	0.00612627	7	17	24	3	0	3
6445	ENSG00000215333	4.93542	-3.00938	1.18708	-2.53512	0.0112409	0.0309907	KRT18P23	NA	0.0538205	7	7	13	3	0	0
7109	ENSG00000260704	3.70372	-2.96875	1.2866	-2.30744	0.0210304	0.0526118	LINC00543	100132234	0.0912742	5	11	5	1	2	0
10974	ENSG00000189377	1.30919	-2.94723	2.13937	-1.37762	0.168321	NA	CXCL17	284340	0.473306	0	5	2	0	1	0
10545	ENSG00000272989	1.29845	-2.94561	2.02155	-1.45711	0.145087	NA	RP13-616I3.1	100129516	0.424571	1	5	1	1	0	0
10954	ENSG00000267174	1.30257	-2.94059	2.12976	-1.38072	0.167366	NA	CTC-510F12.4	NA	0.471433	0	4	3	0	1	0
10398	ENSG00000235350	1.30048	-2.93813	1.98455	-1.4805	0.13874	NA	AF196972.3	NA	0.411696	2	4	1	0	1	0
10399	ENSG00000263503	1.30048	-2.93813	1.98455	-1.4805	0.13874	NA	RP11-707O23.5	NA	0.411696	2	4	1	0	1	0
1115	ENSG00000251257	27.9387	-2.93787	0.488541	-6.01356	1.81489e-09	2.88949e-08	CTD-2263F21.1	NA	5.02276e-08	48	41	59	6	9	4
9035	ENSG00000228118	2.35836	-2.93666	1.65279	-1.77679	0.075603	0.150653	MYL6P5	NA	0.258197	5	1	7	2	0	0
8702	ENSG00000225329	2.40986	-2.93643	1.57896	-1.85972	0.062925	0.129783	LHFPL3-AS2	723809	0.223137	2	8	2	1	1	0
10431	ENSG00000228157	1.28522	-2.93286	1.98936	-1.47427	0.140408	NA	AC007952.5	NA	0.41537	1	2	3	1	0	0
10313	ENSG00000198881	1.29936	-2.93185	1.95949	-1.49623	0.134594	NA	ASB12	142689	0.402724	2	2	2	0	0	1
11051	ENSG00000256518	1.28208	-2.92975	2.14903	-1.36329	0.172791	NA	RP11-807H22.5	NA	0.482473	5	2	0	1	0	0
10590	ENSG00000141506	1.28829	-2.92649	2.02293	-1.44666	0.147993	NA	PIK3R5	23533	0.431235	1	1	5	0	1	0
10601	ENSG00000242616	1.2786	-2.92648	2.02655	-1.44407	0.14872	NA	GNG10	2790	0.432902	1	1	5	1	0	0
10454	ENSG00000147168	1.28724	-2.92556	1.9878	-1.47175	0.141087	NA	IL2RG	3561	0.41638	2	1	3	0	1	0
10455	ENSG00000196196	1.28724	-2.92556	1.9878	-1.47175	0.141087	NA	HRCT1	646962	0.41638	2	1	3	0	1	0
10456	ENSG00000214460	1.28724	-2.92556	1.9878	-1.47175	0.141087	NA	TPT1P6	NA	0.41638	2	1	3	0	1	0
8586	ENSG00000163501	2.39	-2.9254	1.54703	-1.89098	0.0586268	0.122498	IHH	3549	0.210704	2	5	6	1	1	0
10470	ENSG00000283071	1.27651	-2.92454	1.99156	-1.46846	0.141978	NA	RP11-736N17.11	107984640	0.418449	3	1	2	1	0	0
14486	ENSG00000224157	0.590227	-2.92442	3.33592	-0.876644	0.38068	NA	HCG14	414760	0.810811	0	4	0	0	0	0
14487	ENSG00000256093	0.590227	-2.92442	3.33592	-0.876644	0.38068	NA	RP11-158L12.2	NA	0.810811	0	4	0	0	0	0
14488	ENSG00000272479	0.590227	-2.92442	3.33592	-0.876644	0.38068	NA	RP11-301G7.1	NA	0.810811	0	4	0	0	0	0
10609	ENSG00000215861	1.27546	-2.92341	2.02728	-1.44204	0.149292	NA	WI2-1896O14.1	NA	0.43424	5	1	1	1	0	0
11221	ENSG00000235605	1.28167	-2.91943	2.19255	-1.33152	0.183017	NA	RP5-827C21.1	NA	0.503301	1	0	6	0	1	0
8752	ENSG00000249142	2.37676	-2.91915	1.58031	-1.8472	0.0647178	0.132756	CTD-2290P7.1	NA	0.228183	2	2	8	1	1	0
11077	ENSG00000242477	1.28403	-2.91639	2.14648	-1.35868	0.174247	NA	CTD-2161E19.1	NA	0.48537	5	0	2	0	0	1
13620	ENSG00000132026	0.583609	-2.90952	2.97138	-0.979179	0.327492	NA	RTBDN	83546	0.741814	0	2	1	0	0	0
13621	ENSG00000224184	0.583609	-2.90952	2.97138	-0.979179	0.327492	NA	MIR3681HG	100506457	0.741814	0	2	1	0	0	0
13622	ENSG00000226507	0.583609	-2.90952	2.97138	-0.979179	0.327492	NA	IPMKP1	NA	0.741814	0	2	1	0	0	0
13623	ENSG00000272273	0.583609	-2.90952	2.97138	-0.979179	0.327492	NA	XXbac-BPG252P9.10	105379695	0.741814	0	2	1	0	0	0
13637	ENSG00000123689	0.582562	-2.90735	2.97307	-0.977896	0.328126	NA	G0S2	50486	0.741926	1	2	0	0	0	0
13638	ENSG00000151490	0.582562	-2.90735	2.97307	-0.977896	0.328126	NA	PTPRO	5800	0.741926	1	2	0	0	0	0
13639	ENSG00000201592	0.582562	-2.90735	2.97307	-0.977896	0.328126	NA	snoU2_19	NA	0.741926	1	2	0	0	0	0
13640	ENSG00000217702	0.582562	-2.90735	2.97307	-0.977896	0.328126	NA	RP11-287D1.4	107985899	0.741926	1	2	0	0	0	0
13641	ENSG00000225554	0.582562	-2.90735	2.97307	-0.977896	0.328126	NA	RP11-527D7.1	NA	0.741926	1	2	0	0	0	0
13642	ENSG00000227017	0.582562	-2.90735	2.97307	-0.977896	0.328126	NA	AC007036.6	NA	0.741926	1	2	0	0	0	0
13643	ENSG00000228121	0.582562	-2.90735	2.97307	-0.977896	0.328126	NA	PHBP3	NA	0.741926	1	2	0	0	0	0
13644	ENSG00000233985	0.582562	-2.90735	2.97307	-0.977896	0.328126	NA	RP11-297H3.3	NA	0.741926	1	2	0	0	0	0
13645	ENSG00000261664	0.582562	-2.90735	2.97307	-0.977896	0.328126	NA	TTC39A-AS1	NA	0.741926	1	2	0	0	0	0
13646	ENSG00000278588	0.582562	-2.90735	2.97307	-0.977896	0.328126	NA	HIST1H2BI	8346	0.741926	1	2	0	0	0	0
13647	ENSG00000279205	0.582562	-2.90735	2.97307	-0.977896	0.328126	NA	RP11-632P5.1	NA	0.741926	1	2	0	0	0	0
13701	ENSG00000173612	0.576991	-2.89586	2.98352	-0.970616	0.33174	NA	GPRC6A	222545	0.746396	0	1	2	0	0	0
13702	ENSG00000173662	0.576991	-2.89586	2.98352	-0.970616	0.33174	NA	TAS1R1	80835	0.746396	0	1	2	0	0	0
13703	ENSG00000184106	0.576991	-2.89586	2.98352	-0.970616	0.33174	NA	TREML3P	NA	0.746396	0	1	2	0	0	0
13704	ENSG00000203797	0.576991	-2.89586	2.98352	-0.970616	0.33174	NA	DDO	8528	0.746396	0	1	2	0	0	0
13705	ENSG00000211892	0.576991	-2.89586	2.98352	-0.970616	0.33174	NA	IGHG4	NA	0.746396	0	1	2	0	0	0
13706	ENSG00000213867	0.576991	-2.89586	2.98352	-0.970616	0.33174	NA	RP11-829H16.2	NA	0.746396	0	1	2	0	0	0
13707	ENSG00000215311	0.576991	-2.89586	2.98352	-0.970616	0.33174	NA	NPM1P12	NA	0.746396	0	1	2	0	0	0
13708	ENSG00000217442	0.576991	-2.89586	2.98352	-0.970616	0.33174	NA	SYCE3	644186	0.746396	0	1	2	0	0	0
13709	ENSG00000227242	0.576991	-2.89586	2.98352	-0.970616	0.33174	NA	NBPF13P	NA	0.746396	0	1	2	0	0	0
13710	ENSG00000228347	0.576991	-2.89586	2.98352	-0.970616	0.33174	NA	FTLP17	NA	0.746396	0	1	2	0	0	0
13711	ENSG00000229336	0.576991	-2.89586	2.98352	-0.970616	0.33174	NA	AP000568.2	NA	0.746396	0	1	2	0	0	0
13712	ENSG00000231458	0.576991	-2.89586	2.98352	-0.970616	0.33174	NA	RNASEH1P2	NA	0.746396	0	1	2	0	0	0
13713	ENSG00000234589	0.576991	-2.89586	2.98352	-0.970616	0.33174	NA	RP11-253E3.1	NA	0.746396	0	1	2	0	0	0
13714	ENSG00000251250	0.576991	-2.89586	2.98352	-0.970616	0.33174	NA	RP11-404K5.4	NA	0.746396	0	1	2	0	0	0
13715	ENSG00000264281	0.576991	-2.89586	2.98352	-0.970616	0.33174	NA	CTD-2031P19.4	NA	0.746396	0	1	2	0	0	0
12962	ENSG00000039600	0.575944	-2.89366	2.70836	-1.06842	0.285333	NA	SOX30	11063	0.678285	1	1	1	0	0	0
12963	ENSG00000171954	0.575944	-2.89366	2.70836	-1.06842	0.285333	NA	CYP4F22	126410	0.678285	1	1	1	0	0	0
12964	ENSG00000180772	0.575944	-2.89366	2.70836	-1.06842	0.285333	NA	AGTR2	186	0.678285	1	1	1	0	0	0
12965	ENSG00000197253	0.575944	-2.89366	2.70836	-1.06842	0.285333	NA	TPSB2	64499	0.678285	1	1	1	0	0	0
12966	ENSG00000215218	0.575944	-2.89366	2.70836	-1.06842	0.285333	NA	UBE2QL1	134111	0.678285	1	1	1	0	0	0
12967	ENSG00000219146	0.575944	-2.89366	2.70836	-1.06842	0.285333	NA	RPS4XP8	NA	0.678285	1	1	1	0	0	0
12968	ENSG00000224265	0.575944	-2.89366	2.70836	-1.06842	0.285333	NA	RP11-168L22.2	NA	0.678285	1	1	1	0	0	0
12969	ENSG00000225267	0.575944	-2.89366	2.70836	-1.06842	0.285333	NA	RPL8P2	NA	0.678285	1	1	1	0	0	0
12970	ENSG00000227684	0.575944	-2.89366	2.70836	-1.06842	0.285333	NA	CROCCP4	NA	0.678285	1	1	1	0	0	0
12971	ENSG00000235872	0.575944	-2.89366	2.70836	-1.06842	0.285333	NA	RP11-335O4.3	NA	0.678285	1	1	1	0	0	0
12972	ENSG00000236972	0.575944	-2.89366	2.70836	-1.06842	0.285333	NA	FABP5P1	NA	0.678285	1	1	1	0	0	0
12973	ENSG00000241007	0.575944	-2.89366	2.70836	-1.06842	0.285333	NA	SEPT7P6	NA	0.678285	1	1	1	0	0	0
12974	ENSG00000243071	0.575944	-2.89366	2.70836	-1.06842	0.285333	NA	RP11-613M5.2	NA	0.678285	1	1	1	0	0	0
12975	ENSG00000243504	0.575944	-2.89366	2.70836	-1.06842	0.285333	NA	RPS23P1	NA	0.678285	1	1	1	0	0	0
12976	ENSG00000255993	0.575944	-2.89366	2.70836	-1.06842	0.285333	NA	PSMC1P9	NA	0.678285	1	1	1	0	0	0
12977	ENSG00000256779	0.575944	-2.89366	2.70836	-1.06842	0.285333	NA	RP11-60C6.5	NA	0.678285	1	1	1	0	0	0
12978	ENSG00000264655	0.575944	-2.89366	2.70836	-1.06842	0.285333	NA	CTD-2267D19.4	NA	0.678285	1	1	1	0	0	0
12979	ENSG00000268510	0.575944	-2.89366	2.70836	-1.06842	0.285333	NA	IFNL3P1	NA	0.678285	1	1	1	0	0	0
12980	ENSG00000269191	0.575944	-2.89366	2.70836	-1.06842	0.285333	NA	AC005387.2	NA	0.678285	1	1	1	0	0	0
12981	ENSG00000273802	0.575944	-2.89366	2.70836	-1.06842	0.285333	NA	HIST1H2BG	8339	0.678285	1	1	1	0	0	0
13736	ENSG00000019169	0.574897	-2.89148	2.98664	-0.968136	0.332976	NA	MARCO	8685	0.747549	2	1	0	0	0	0
13737	ENSG00000225695	0.574897	-2.89148	2.98664	-0.968136	0.332976	NA	HNRNPA1P35	NA	0.747549	2	1	0	0	0	0
13738	ENSG00000228149	0.574897	-2.89148	2.98664	-0.968136	0.332976	NA	RPL3P1	NA	0.747549	2	1	0	0	0	0
13739	ENSG00000234354	0.574897	-2.89148	2.98664	-0.968136	0.332976	NA	RPS26P47	NA	0.747549	2	1	0	0	0	0
13740	ENSG00000239470	0.574897	-2.89148	2.98664	-0.968136	0.332976	NA	RP11-16F15.2	NA	0.747549	2	1	0	0	0	0
3170	ENSG00000244067	12.9049	-2.8908	0.707612	-4.08529	4.4022e-05	0.000246523	GSTA2	2939	0.000428527	19	33	16	5	2	3
14655	ENSG00000241120	0.570372	-2.88153	3.37556	-0.853645	0.393302	NA	HMGN1P8	NA	0.827978	0	0	3	0	0	0
14656	ENSG00000253706	0.570372	-2.88153	3.37556	-0.853645	0.393302	NA	RP11-758M4.4	NA	0.827978	0	0	3	0	0	0
14657	ENSG00000255507	0.570372	-2.88153	3.37556	-0.853645	0.393302	NA	RP11-535A19.2	NA	0.827978	0	0	3	0	0	0
14658	ENSG00000280216	0.570372	-2.88153	3.37556	-0.853645	0.393302	NA	RP3-333H23.9	NA	0.827978	0	0	3	0	0	0
13811	ENSG00000180209	0.569325	-2.87986	2.99525	-0.961476	0.336313	NA	MYLPF	29895	0.750774	1	0	2	0	0	0
13812	ENSG00000206069	0.569325	-2.87986	2.99525	-0.961476	0.336313	NA	TMEM211	255349	0.750774	1	0	2	0	0	0
13813	ENSG00000213560	0.569325	-2.87986	2.99525	-0.961476	0.336313	NA	RP11-386I14.3	NA	0.750774	1	0	2	0	0	0
13814	ENSG00000213601	0.569325	-2.87986	2.99525	-0.961476	0.336313	NA	KRT18P19	NA	0.750774	1	0	2	0	0	0
13815	ENSG00000225678	0.569325	-2.87986	2.99525	-0.961476	0.336313	NA	AP000619.5	NA	0.750774	1	0	2	0	0	0
13816	ENSG00000227404	0.569325	-2.87986	2.99525	-0.961476	0.336313	NA	KRT8P20	NA	0.750774	1	0	2	0	0	0
13817	ENSG00000230829	0.569325	-2.87986	2.99525	-0.961476	0.336313	NA	CTD-2186M15.1	NA	0.750774	1	0	2	0	0	0
13818	ENSG00000248966	0.569325	-2.87986	2.99525	-0.961476	0.336313	NA	BCLAF1P1	NA	0.750774	1	0	2	0	0	0
13819	ENSG00000250442	0.569325	-2.87986	2.99525	-0.961476	0.336313	NA	EIF3KP3	NA	0.750774	1	0	2	0	0	0
13820	ENSG00000259783	0.569325	-2.87986	2.99525	-0.961476	0.336313	NA	RP11-1006G14.2	NA	0.750774	1	0	2	0	0	0
13821	ENSG00000260690	0.569325	-2.87986	2.99525	-0.961476	0.336313	NA	CYCSP39	NA	0.750774	1	0	2	0	0	0
13822	ENSG00000275120	0.569325	-2.87986	2.99525	-0.961476	0.336313	NA	RP11-182J1.18	NA	0.750774	1	0	2	0	0	0
13823	ENSG00000284461	0.569325	-2.87986	2.99525	-0.961476	0.336313	NA	NA	NA	0.750774	1	0	2	0	0	0
3660	ENSG00000237039	12.6151	-2.87947	0.756175	-3.80794	0.000140131	0.000679672	AC018738.2	NA	0.00118146	19	22	25	7	1	1
7296	ENSG00000185885	3.48083	-2.87793	1.27996	-2.24845	0.0245477	0.0598832	IFITM1	8519	0.103823	7	6	6	2	0	1
13838	ENSG00000077522	0.568278	-2.87765	2.99673	-0.960264	0.336922	NA	ACTN2	88	0.75083	2	0	1	0	0	0
13839	ENSG00000168748	0.568278	-2.87765	2.99673	-0.960264	0.336922	NA	CA7	766	0.75083	2	0	1	0	0	0
13840	ENSG00000196092	0.568278	-2.87765	2.99673	-0.960264	0.336922	NA	PAX5	5079	0.75083	2	0	1	0	0	0
13841	ENSG00000213673	0.568278	-2.87765	2.99673	-0.960264	0.336922	NA	SLC25A5P3	NA	0.75083	2	0	1	0	0	0
13842	ENSG00000214897	0.568278	-2.87765	2.99673	-0.960264	0.336922	NA	U82695.5	NA	0.75083	2	0	1	0	0	0
13843	ENSG00000223566	0.568278	-2.87765	2.99673	-0.960264	0.336922	NA	TNRC18P2	NA	0.75083	2	0	1	0	0	0
13844	ENSG00000226701	0.568278	-2.87765	2.99673	-0.960264	0.336922	NA	RP11-570G20.1	NA	0.75083	2	0	1	0	0	0
13845	ENSG00000229880	0.568278	-2.87765	2.99673	-0.960264	0.336922	NA	IMMTP1	NA	0.75083	2	0	1	0	0	0
13846	ENSG00000262823	0.568278	-2.87765	2.99673	-0.960264	0.336922	NA	RP13-580F15.2	NA	0.75083	2	0	1	0	0	0
13847	ENSG00000266308	0.568278	-2.87765	2.99673	-0.960264	0.336922	NA	RN7SL510P	NA	0.75083	2	0	1	0	0	0
4842	ENSG00000102935	6.98119	-2.87764	0.902305	-3.1892	0.00142665	0.0052301	ZNF423	23090	0.0090914	11	14	11	2	2	1
14682	ENSG00000114013	0.567232	-2.8746	3.38204	-0.84996	0.395347	NA	CD86	942	0.830641	3	0	0	0	0	0
14683	ENSG00000185847	0.567232	-2.8746	3.38204	-0.84996	0.395347	NA	LINC01405	100131138	0.830641	3	0	0	0	0	0
14684	ENSG00000224863	0.567232	-2.8746	3.38204	-0.84996	0.395347	NA	LINC01398	101929651	0.830641	3	0	0	0	0	0
14685	ENSG00000234402	0.567232	-2.8746	3.38204	-0.84996	0.395347	NA	ELK2BP	NA	0.830641	3	0	0	0	0	0
14686	ENSG00000235582	0.567232	-2.8746	3.38204	-0.84996	0.395347	NA	RP11-448G4.2	NA	0.830641	3	0	0	0	0	0
14687	ENSG00000258605	0.567232	-2.8746	3.38204	-0.84996	0.395347	NA	DYNLL1P2	NA	0.830641	3	0	0	0	0	0
4843	ENSG00000165215	6.98007	-2.87314	0.900908	-3.18916	0.00142685	0.0052301	CLDN3	1365	0.0090914	11	13	13	2	1	2
5205	ENSG00000204385	7.04989	-2.86425	0.949424	-3.01683	0.00255434	0.00871174	SLC44A4	80736	0.0151435	6	20	11	1	2	3
4528	ENSG00000173376	8.12506	-2.84715	0.851246	-3.34469	0.000823749	0.0032295	NDNF	79625	0.00561379	10	18	15	1	3	3
7521	ENSG00000167815	3.50885	-2.84611	1.30087	-2.18785	0.0286805	0.0679246	PRDX2	7001	0.117664	3	6	9	0	1	2
310	ENSG00000102109	200.152	-2.82622	0.353779	-7.98867	1.364e-15	7.81091e-14	PCSK1N	27344	1.35776e-13	341	366	346	90	29	29
9523	ENSG00000163888	2.16719	-2.79978	1.68194	-1.66461	0.0959904	NA	CAMK2N2	94032	0.311044	6	1	5	2	0	0
8849	ENSG00000188624	3.3585	-2.785	1.52745	-1.8233	0.0682573	0.138671	IGFL3	388555	0.238025	0	14	3	1	0	2
9100	ENSG00000241680	2.18559	-2.78165	1.5817	-1.75865	0.0786368	NA	RPL31P49	NA	0.266657	3	2	6	1	1	0
3186	ENSG00000171431	13.2345	-2.78089	0.682236	-4.07614	4.57885e-05	0.000255128	KRT20	54474	0.000443485	23	31	16	3	5	2
6528	ENSG00000226243	4.41172	-2.76764	1.1055	-2.50351	0.012297	0.0334707	RPL37AP1	NA	0.0581281	7	8	8	1	1	2
9144	ENSG00000233111	2.2053	-2.75478	1.57628	-1.74765	0.0805249	NA	RAB1C	NA	0.271745	6	4	2	0	1	1
6852	ENSG00000263934	38.3114	-2.7526	1.15201	-2.38939	0.0168766	0.0437746	SNORD3A	780851	0.0760038	18	54	128	14	14	1
1820	ENSG00000265735	60.8019	-2.74136	0.533085	-5.14243	2.71204e-07	2.64528e-06	RN7SL5P	NA	4.59824e-06	47	86	185	19	24	4
3732	ENSG00000165695	14.8471	-2.72945	0.725336	-3.76301	0.000167879	0.00079855	AK8	158067	0.00138811	8	33	37	6	4	2
1627	ENSG00000220472	35.4369	-2.71574	0.506687	-5.35979	8.33195e-08	9.09089e-07	RP11-69L16.5	NA	1.58025e-06	67	45	73	18	4	5
594	ENSG00000044012	237.633	-2.69785	0.382746	-7.04867	1.8063e-12	5.39823e-11	GUCA2B	2981	9.38365e-11	639	244	352	69	92	29
12133	ENSG00000236091	1.11907	-2.68939	2.26881	-1.18538	0.235869	NA	RP3-473B4.3	340581	0.59984	0	5	1	0	1	0
1094	ENSG00000167644	61.4529	-2.68388	0.442814	-6.06095	1.35317e-09	2.19575e-08	C19orf33	64073	3.81684e-08	84	80	155	29	9	11
12063	ENSG00000267282	1.10276	-2.68139	2.23798	-1.19813	0.230866	NA	CTB-129P6.4	NA	0.590572	0	4	2	1	0	0
12054	ENSG00000230793	1.11245	-2.68137	2.23261	-1.201	0.229751	NA	SMARCE1P5	NA	0.588157	0	4	2	0	1	0
11558	ENSG00000279593	1.1114	-2.6796	2.09661	-1.27806	0.201227	NA	RP11-131H24.5	NA	0.537243	1	4	1	0	1	0
11546	ENSG00000273821	1.1169	-2.67959	2.09414	-1.27957	0.200697	NA	RP5-963E22.6	NA	0.536385	1	4	1	0	0	1
12053	ENSG00000239524	1.11585	-2.67887	2.23047	-1.20103	0.229738	NA	RPL32P34	NA	0.588157	2	4	0	0	0	1
541	ENSG00000255823	169.267	-2.67843	0.373538	-7.17045	7.47538e-13	2.45292e-11	MTRNR2L8	100616263	4.26387e-11	212	251	415	74	42	21
7908	ENSG00000227973	3.11899	-2.67745	1.28797	-2.07882	0.0376337	0.0849211	PIN4P1	NA	0.146852	5	7	5	1	1	1
8193	ENSG00000159763	3.09049	-2.6755	1.3403	-1.99619	0.0459133	0.100179	PIP	5304	0.172927	8	4	5	1	2	0
12067	ENSG00000273381	1.11133	-2.67354	2.23235	-1.19763	0.231061	NA	RP11-305L7.7	NA	0.590874	0	2	3	0	0	1
1446	ENSG00000266402	83.1096	-2.67277	0.481992	-5.54526	2.93516e-08	3.60338e-07	SNHG25	NA	6.2637e-07	93	87	251	40	15	12
11502	ENSG00000226510	1.09509	-2.67209	2.07803	-1.28587	0.198487	NA	UPK1A-AS1	100862728	0.532367	1	2	2	1	0	0
11488	ENSG00000105251	1.10478	-2.67208	2.07363	-1.2886	0.197536	NA	SHD	56961	0.530603	1	2	2	0	1	0
11472	ENSG00000261441	1.11028	-2.67208	2.07115	-1.29014	0.197002	NA	RP11-217B1.2	NA	0.529815	1	2	2	0	0	1
11514	ENSG00000198821	1.09405	-2.6709	2.07839	-1.28508	0.198764	NA	CD247	919	0.53265	2	2	1	1	0	0
11515	ENSG00000231409	1.09405	-2.6709	2.07839	-1.28508	0.198764	NA	RP11-83J16.1	NA	0.53265	2	2	1	1	0	0
11494	ENSG00000266184	1.10374	-2.6709	2.07398	-1.28781	0.197811	NA	RP11-552O4.2	NA	0.531064	2	2	1	0	1	0
4705	ENSG00000260552	8.21261	-2.66655	0.818145	-3.25926	0.00111702	0.00421454	RP11-49I11.1	101927809	0.00732606	15	14	14	2	3	1
12214	ENSG00000196240	1.09921	-2.66564	2.27729	-1.17053	0.241786	NA	OR2T2	401992	0.61086	0	1	5	0	1	0
12231	ENSG00000229596	1.08952	-2.66564	2.28277	-1.16772	0.242919	NA	MYL8P	NA	0.612806	0	1	5	1	0	0
12232	ENSG00000250195	1.08952	-2.66564	2.28277	-1.16772	0.242919	NA	RP11-371F15.3	105377448	0.612806	0	1	5	1	0	0
11630	ENSG00000175084	1.09816	-2.66461	2.10114	-1.26817	0.204736	NA	DES	1674	0.543141	1	1	3	0	1	0
11631	ENSG00000260573	1.09816	-2.66461	2.10114	-1.26817	0.204736	NA	RP11-21B23.3	NA	0.543141	1	1	3	0	1	0
11519	ENSG00000223485	1.10261	-2.66346	2.07372	-1.28439	0.199006	NA	LINC01615	101929484	0.533053	2	1	2	0	0	1
11520	ENSG00000237978	1.10261	-2.66346	2.07372	-1.28439	0.199006	NA	KCNMB2-AS1	NA	0.533053	2	1	2	0	0	1
11528	ENSG00000159197	1.09712	-2.66345	2.07622	-1.28284	0.199548	NA	KCNE2	9992	0.533951	2	1	2	0	1	0
11529	ENSG00000237064	1.09712	-2.66345	2.07622	-1.28284	0.199548	NA	EIF3IP1	442720	0.533951	2	1	2	0	1	0
11530	ENSG00000248930	1.09712	-2.66345	2.07622	-1.28284	0.199548	NA	CTC-250P20.1	NA	0.533951	2	1	2	0	1	0
11531	ENSG00000255007	1.09712	-2.66345	2.07622	-1.28284	0.199548	NA	CTD-2589M5.4	NA	0.533951	2	1	2	0	1	0
11532	ENSG00000266944	1.09712	-2.66345	2.07622	-1.28284	0.199548	NA	AC005262.4	NA	0.533951	2	1	2	0	1	0
11543	ENSG00000164972	1.08743	-2.66345	2.08067	-1.28009	0.200513	NA	C9orf24	84688	0.535985	2	1	2	1	0	0
11544	ENSG00000254012	1.08743	-2.66345	2.08067	-1.28009	0.200513	NA	RPL10P8	NA	0.535985	2	1	2	1	0	0
11632	ENSG00000213452	1.10157	-2.66221	2.09934	-1.26812	0.204756	NA	AKR1B1P2	NA	0.543141	3	1	1	0	0	1
11633	ENSG00000268536	1.10157	-2.66221	2.09934	-1.26812	0.204756	NA	AC005523.3	NA	0.543141	3	1	1	0	0	1
11639	ENSG00000183560	1.09607	-2.6622	2.10186	-1.26659	0.205302	NA	IZUMO1R	390243	0.544308	3	1	1	0	1	0
12226	ENSG00000260009	1.10052	-2.66056	2.27602	-1.16895	0.242423	NA	RP11-65J21.1	105447648	0.611866	5	1	0	0	0	1
10171	ENSG00000240785	1.98787	-2.65744	1.74622	-1.52182	0.128054	NA	RPL36AP21	NA	0.388505	1	2	7	2	0	0
12250	ENSG00000261064	1.09704	-2.65639	2.27753	-1.16634	0.243476	NA	RP11-1000B6.3	NA	0.61332	1	0	5	0	0	1
12278	ENSG00000233220	1.08186	-2.65636	2.28618	-1.16192	0.245268	NA	LINC00167	NA	0.616426	1	0	5	1	0	0
10408	ENSG00000121413	1.98125	-2.65486	1.79471	-1.47927	0.139069	NA	ZSCAN18	65982	0.412318	1	1	8	2	0	0
12143	ENSG00000126838	1.08945	-2.65398	2.24241	-1.18354	0.236596	NA	PZP	5858	0.601241	3	0	2	0	1	0
12166	ENSG00000235175	1.07976	-2.65396	2.24795	-1.18061	0.237757	NA	RPL26P37	NA	0.602999	3	0	2	1	0	0
12167	ENSG00000240006	1.07976	-2.65396	2.24795	-1.18061	0.237757	NA	RP11-200A1.1	NA	0.602999	3	0	2	1	0	0
2659	ENSG00000110195	16.4478	-2.65235	0.59806	-4.43492	9.21076e-06	6.14928e-05	FOLR1	2348	0.000106892	33	25	27	2	7	4
13057	ENSG00000258580	1.09286	-2.65038	2.5075	-1.05698	0.29052	NA	RP11-320M16.2	NA	0.686511	6	0	0	0	0	1
4048	ENSG00000249641	11.1324	-2.64308	0.737847	-3.58215	0.000340775	0.00149443	HOXC13-AS	100874366	0.00259773	10	19	29	4	3	3
7163	ENSG00000162009	4.04019	-2.619	1.14456	-2.28822	0.0221248	0.0549391	SSTR5	6755	0.095313	5	9	7	1	1	2
10323	ENSG00000171759	2.03365	-2.61181	1.74783	-1.49432	0.135092	NA	PAH	5053	0.403824	0	6	5	0	1	1
5764	ENSG00000179344	7.99274	-2.6071	0.936077	-2.78514	0.00535048	0.0164784	HLA-DQB1	3119	0.0286442	25	7	9	1	5	1
10202	ENSG00000234093	1.99854	-2.60529	1.7178	-1.51665	0.129356	NA	RPS15AP11	NA	0.391263	3	1	6	0	2	0
7506	ENSG00000189433	3.9942	-2.60369	1.18827	-2.19117	0.0284394	0.0674942	GJB4	127534	0.116918	11	2	7	1	1	2
9811	ENSG00000231916	2.00856	-2.59851	1.62324	-1.60082	0.109416	NA	AC006033.22	NA	0.344119	6	2	2	0	1	1
7738	ENSG00000183690	4.01679	-2.59575	1.21787	-2.13138	0.0330579	0.0762235	EFHC2	80258	0.13183	5	4	13	0	2	2
11185	ENSG00000133665	1.98669	-2.59454	1.9404	-1.33712	0.181185	NA	DYDC2	84332	0.499866	9	0	1	0	2	0
10565	ENSG00000231412	2.00647	-2.59291	1.78515	-1.45249	0.146367	NA	CTC-490G23.2	NA	0.427504	8	2	0	0	1	1
3	ENSG00000132821	300.39	-2.58542	0.192645	-13.4206	4.58044e-41	2.7104e-37	VSTM2L	128434	4.71144e-37	469	531	545	87	90	81
6240	ENSG00000180535	5.81187	-2.58084	0.989728	-2.60763	0.00911714	0.0259413	BHLHA15	168620	0.045086	9	9	11	3	0	2
5211	ENSG00000243449	89.6904	-2.5594	0.849387	-3.01323	0.00258481	0.00880551	C4orf48	401115	0.0153065	163	144	153	56	17	5
5307	ENSG00000250222	7.61164	-2.55139	0.857491	-2.97541	0.00292597	0.0097874	CTC-338M12.5	NA	0.0170133	11	11	17	4	1	2
4300	ENSG00000101441	10.5831	-2.55127	0.737878	-3.45757	0.000545066	0.00224986	CST4	1472	0.0039109	14	21	19	4	1	4
4586	ENSG00000200488	17.0481	-2.54337	0.767572	-3.31353	0.000921272	0.00356616	RN7SKP203	NA	0.006199	6	21	60	7	5	3
243	ENSG00000105404	193.672	-2.52804	0.304652	-8.29811	1.05783e-16	7.7278e-15	RABAC1	10567	1.34331e-14	298	307	386	87	53	32
6765	ENSG00000090382	5.709	-2.5151	1.03856	-2.42172	0.0154471	0.0405827	LYZ	4069	0.0704609	3	19	7	1	3	2
3214	ENSG00000263639	20.0649	-2.51508	0.620223	-4.05511	5.011e-05	0.000276775	MSMB	4477	0.000481112	22	27	54	2	9	8
227	ENSG00000099624	724.065	-2.50867	0.299658	-8.37179	5.67516e-17	4.43813e-15	ATP5D	513	7.71472e-15	1348	1163	1185	358	147	143
1176	ENSG00000214748	44.7478	-2.50832	0.423325	-5.92527	3.1178e-09	4.70639e-08	RP11-332E4.1	NA	8.18104e-08	74	55	99	19	7	14
102	ENSG00000166816	120.171	-2.50326	0.27241	-9.18932	3.95341e-20	6.88049e-18	LDHD	197257	1.19602e-17	163	214	236	43	35	30
6400	ENSG00000243802	5.65945	-2.49902	0.978267	-2.55454	0.0106327	0.0295202	RP11-390K5.1	NA	0.0512664	6	9	14	1	2	3
23	ENSG00000051523	1437.13	-2.48887	0.234062	-10.6334	2.08483e-26	1.60913e-23	CYBA	1535	2.79712e-23	2492	2190	2637	615	327	361
4530	ENSG00000105672	11.0668	-2.48819	0.744072	-3.34401	0.000825758	0.00323595	ETV2	2116	0.005625	10	17	30	5	2	4
2053	ENSG00000125999	28.4939	-2.48667	0.503158	-4.94212	7.7279e-07	6.68221e-06	BPIFB1	92747	1.16156e-05	56	53	37	10	13	3
10874	ENSG00000249456	1.79356	-2.4866	1.78303	-1.39459	0.163139	NA	RP11-298J20.4	NA	0.462933	6	2	1	2	0	0
631	ENSG00000162078	50.8049	-2.47754	0.356729	-6.94515	3.78062e-12	1.06361e-10	ZG16B	124220	1.84885e-10	73	97	89	13	20	14
8965	ENSG00000253506	2.70927	-2.47288	1.37949	-1.79261	0.0730356	0.146616	NACA2	342538	0.251392	6	5	3	2	1	0
8172	ENSG00000060303	3.59334	-2.47251	1.23601	-2.0004	0.0454574	0.0994282	RPS17P5	NA	0.17165	8	4	7	2	1	0
4903	ENSG00000230734	9.24596	-2.472	0.782423	-3.15941	0.00158089	0.00572382	RPL10P3	NA	0.00994962	19	8	19	2	3	4
7178	ENSG00000270919	4.56708	-2.4662	1.07993	-2.28367	0.0223911	0.055484	RP11-379K22.3	NA	0.0962588	5	13	6	2	2	1
10393	ENSG00000241416	1.80639	-2.46313	1.66244	-1.48164	0.138437	NA	KRT8P13	NA	0.411035	2	2	5	1	1	0
10349	ENSG00000213171	1.80535	-2.46223	1.65214	-1.49032	0.136139	NA	LINGO4	339398	0.405931	3	2	3	1	1	0
9185	ENSG00000264278	2.70605	-2.4617	1.41428	-1.7406	0.0817541	0.160471	RP11-162A12.2	100131655	0.274662	8	4	2	2	0	1
10397	ENSG00000204397	1.8043	-2.46167	1.66263	-1.48059	0.138717	NA	CARD16	114769	0.411696	5	2	2	1	1	0
10506	ENSG00000172460	1.81955	-2.45731	1.68075	-1.46203	0.143732	NA	PRSS30P	124221	0.422129	1	4	5	1	0	1
5553	ENSG00000260459	7.29355	-2.4568	0.857893	-2.86376	0.0041864	0.0133814	FTLP14	NA	0.0232606	7	17	14	2	2	3
3703	ENSG00000226981	16.0588	-2.45595	0.649066	-3.78382	0.00015444	0.000740379	ABHD17AP6	NA	0.00128699	33	26	23	10	4	1
9016	ENSG00000264107	2.71234	-2.45533	1.37819	-1.78156	0.0748208	0.149356	RP11-848P1.5	NA	0.25608	6	4	5	1	2	0
8047	ENSG00000251002	3.6304	-2.45433	1.20615	-2.03485	0.0418663	0.0929246	AE000661.37	NA	0.160546	5	6	8	2	0	2
10417	ENSG00000229635	1.81189	-2.45194	1.66038	-1.47673	0.139749	NA	RP4-713B5.2	NA	0.413973	2	2	5	1	0	1
2694	ENSG00000106565	20.9578	-2.44935	0.555832	-4.40663	1.04989e-05	6.91823e-05	TMEM176B	28959	0.000120258	19	41	46	6	5	9
9531	ENSG00000254991	2.73841	-2.44767	1.47314	-1.66153	0.0966076	0.183459	RP13-631K18.3	NA	0.312781	2	6	6	0	3	0
1894	ENSG00000171236	26.0673	-2.44144	0.480547	-5.08055	3.7634e-07	3.52735e-06	LRG1	116844	6.13153e-06	57	38	38	9	10	5
2482	ENSG00000219928	45.4796	-2.43308	0.533769	-4.5583	5.15693e-06	3.68839e-05	RP11-40C6.2	NA	6.41146e-05	75	50	106	29	10	4
9156	ENSG00000112212	2.74626	-2.43082	1.39213	-1.74612	0.0807898	0.159076	TSPO2	222642	0.272262	6	6	2	0	1	2
4972	ENSG00000277654	9.71431	-2.43078	0.777976	-3.12449	0.00178114	0.00635892	RP11-255M2.3	NA	0.0110536	20	9	19	6	2	2
6585	ENSG00000236618	6.15282	-2.42692	0.979197	-2.47848	0.0131944	0.0356018	PITPNA-AS1	100306951	0.0618297	5	13	14	4	1	1
11537	ENSG00000174521	1.84241	-2.42277	1.89008	-1.28184	0.1999	NA	TTC9B	148014	0.534674	0	5	5	0	0	2
5542	ENSG00000215006	8.65776	-2.40712	0.838905	-2.86936	0.00411303	0.0131748	CHCHD2P2	NA	0.0229015	12	17	15	6	3	0
3939	ENSG00000002933	23.0041	-2.40413	0.660255	-3.64122	0.000271352	0.00122291	TMEM176A	55365	0.00212576	8	61	47	8	4	10
6776	ENSG00000180389	5.24221	-2.40085	0.993058	-2.41764	0.0156216	0.0409744	ATP5EP2	NA	0.071141	6	8	13	2	2	1
833	ENSG00000259772	44.9294	-2.39672	0.36861	-6.50206	7.92297e-11	1.68846e-09	RP11-16E12.2	NA	2.93502e-09	73	64	90	13	14	16
2147	ENSG00000233493	64.6514	-2.38947	0.493538	-4.84151	1.28858e-06	1.06544e-05	TMEM238	388564	1.85203e-05	93	113	120	44	9	8
6731	ENSG00000235297	5.2574	-2.38937	0.981085	-2.43544	0.0148738	0.0392648	FAUP1	NA	0.0681723	6	8	13	2	2	2
345	ENSG00000142484	102.204	-2.38901	0.302175	-7.90605	2.65684e-15	1.36708e-13	TM4SF5	9032	2.37637e-13	168	189	159	48	27	23
7391	ENSG00000232368	4.35179	-2.3793	1.07144	-2.22066	0.0263737	0.0635614	FTLP2	NA	0.110099	9	8	5	2	1	2
3192	ENSG00000169994	20.0703	-2.37681	0.584058	-4.06948	4.71179e-05	0.000262041	MYO7B	4648	0.000455502	19	54	27	6	4	9
1589	ENSG00000174021	54.2395	-2.36988	0.43891	-5.39947	6.68382e-08	7.46703e-07	GNG5	2787	1.29798e-06	92	96	86	33	11	8
9863	ENSG00000225616	2.51155	-2.36898	1.48904	-1.59094	0.111623	0.206066	RP4-604A21.1	NA	0.34923	3	5	5	2	0	0
13561	ENSG00000245468	0.912635	-2.36516	2.39583	-0.987199	0.323545	NA	RP11-367J11.3	NA	0.736226	0	4	1	1	0	0
13542	ENSG00000101194	0.922325	-2.36513	2.38872	-0.990123	0.322114	NA	SLC17A9	63910	0.733923	0	4	1	0	1	0
13530	ENSG00000109193	0.927821	-2.36511	2.38474	-0.991769	0.32131	NA	SULT1E1	6783	0.732816	0	4	1	0	0	1
13550	ENSG00000179219	0.921278	-2.36359	2.38934	-0.98922	0.322556	NA	LINC00311	NA	0.73457	1	4	0	0	1	0
1409	ENSG00000240463	51.8897	-2.36031	0.421553	-5.59907	2.15507e-08	2.71518e-07	RPS19P3	NA	4.71975e-07	93	60	107	17	8	27
13518	ENSG00000233597	0.906016	-2.3554	2.37188	-0.993054	0.320684	NA	RP11-343B5.1	NA	0.731982	0	2	2	1	0	0
13519	ENSG00000240540	0.906016	-2.3554	2.37188	-0.993054	0.320684	NA	RPL3P9	NA	0.731982	0	2	2	1	0	0
13482	ENSG00000254233	0.915706	-2.35539	2.3647	-0.99606	0.319221	NA	RP11-242J7.1	NA	0.729914	0	2	2	0	1	0
13462	ENSG00000231527	0.921203	-2.35538	2.36068	-0.997752	0.3184	NA	RP11-374M1.2	NA	0.729737	0	2	2	0	0	1
13463	ENSG00000249803	0.921203	-2.35538	2.36068	-0.997752	0.3184	NA	RP11-114H21.2	NA	0.729737	0	2	2	0	0	1
13464	ENSG00000270225	0.921203	-2.35538	2.36068	-0.997752	0.3184	NA	MTCO2P22	NA	0.729737	0	2	2	0	0	1
13016	ENSG00000132746	0.90497	-2.3535	2.21494	-1.06256	0.287982	NA	ALDH3B2	222	0.682636	1	2	1	1	0	0
13017	ENSG00000197575	0.90497	-2.3535	2.21494	-1.06256	0.287982	NA	RPS17P2	NA	0.682636	1	2	1	1	0	0
13018	ENSG00000228695	0.90497	-2.3535	2.21494	-1.06256	0.287982	NA	CES1P1	51716	0.682636	1	2	1	1	0	0
12997	ENSG00000028137	0.914659	-2.35348	2.20905	-1.06538	0.286704	NA	TNFRSF1B	102465836	0.680546	1	2	1	0	1	0
12998	ENSG00000144035	0.914659	-2.35348	2.20905	-1.06538	0.286704	NA	NAT8	9027	0.680546	1	2	1	0	1	0
12999	ENSG00000174343	0.914659	-2.35348	2.20905	-1.06538	0.286704	NA	CHRNA9	55584	0.680546	1	2	1	0	1	0
13000	ENSG00000222112	0.914659	-2.35348	2.20905	-1.06538	0.286704	NA	RN7SKP16	NA	0.680546	1	2	1	0	1	0
12985	ENSG00000259316	0.920156	-2.35347	2.20576	-1.06697	0.285986	NA	CTD-2116N17.1	NA	0.679512	1	2	1	0	0	1
12986	ENSG00000278399	0.920156	-2.35347	2.20576	-1.06697	0.285986	NA	RP11-74M13.5	NA	0.679512	1	2	1	0	0	1
13533	ENSG00000120498	0.903923	-2.35232	2.37316	-0.991219	0.321579	NA	TEX11	56159	0.733211	2	2	0	1	0	0
13534	ENSG00000222808	0.903923	-2.35232	2.37316	-0.991219	0.321579	NA	RNU4-47P	NA	0.733211	2	2	0	1	0	0
13511	ENSG00000163053	0.913612	-2.35231	2.36596	-0.994231	0.320111	NA	SLC16A14	151473	0.730944	2	2	0	0	1	0
13512	ENSG00000200714	0.913612	-2.35231	2.36596	-0.994231	0.320111	NA	Y_RNA	NA	0.730944	2	2	0	0	1	0
13513	ENSG00000261407	0.913612	-2.35231	2.36596	-0.994231	0.320111	NA	RP11-326A19.3	NA	0.730944	2	2	0	0	1	0
13514	ENSG00000281920	0.913612	-2.35231	2.36596	-0.994231	0.320111	NA	RP11-418H16.1	NA	0.730944	2	2	0	0	1	0
9622	ENSG00000166426	2.51567	-2.34802	1.43439	-1.63695	0.101641	0.191299	CRABP1	1381	0.325966	2	4	7	2	1	0
13607	ENSG00000258122	0.914584	-2.34573	2.39266	-0.980382	0.326897	NA	RP11-61A14.1	NA	0.741288	0	1	3	0	0	1
13036	ENSG00000228974	0.908041	-2.34431	2.21232	-1.05966	0.2893	NA	AC006483.5	NA	0.684812	1	1	2	0	1	0
13058	ENSG00000253653	0.898351	-2.3443	2.21827	-1.05682	0.290596	NA	CTC-248O19.1	NA	0.686511	1	1	2	1	0	0
13059	ENSG00000258285	0.898351	-2.3443	2.21827	-1.05682	0.290596	NA	TESC-AS1	NA	0.686511	1	1	2	1	0	0
13060	ENSG00000260281	0.898351	-2.3443	2.21827	-1.05682	0.290596	NA	ITFG1-AS1	NA	0.686511	1	1	2	1	0	0
13061	ENSG00000260541	0.898351	-2.3443	2.21827	-1.05682	0.290596	NA	LA16c-429E7.1	NA	0.686511	1	1	2	1	0	0
13062	ENSG00000263370	0.898351	-2.3443	2.21827	-1.05682	0.290596	NA	RP11-68I3.5	NA	0.686511	1	1	2	1	0	0
13031	ENSG00000079557	0.91249	-2.34284	2.20951	-1.06035	0.288987	NA	AFM	173	0.684282	2	1	1	0	0	1
13032	ENSG00000121089	0.91249	-2.34284	2.20951	-1.06035	0.288987	NA	NACA3P	NA	0.684282	2	1	1	0	0	1
13042	ENSG00000248746	0.906994	-2.34284	2.21285	-1.05875	0.289716	NA	ACTN3	89	0.685482	2	1	1	0	1	0
13663	ENSG00000234488	0.905947	-2.34105	2.39867	-0.97598	0.329074	NA	AC096664.1	NA	0.743217	3	1	0	0	1	0
4058	ENSG00000171916	14.3883	-2.34064	0.654329	-3.57716	0.00034735	0.00151951	LGALS9C	654346	0.00264133	40	14	18	6	5	4
17505	ENSG00000103490	0.393485	-2.33918	3.88897	-0.60149	0.547514	NA	PYCARD	29108	0.940998	0	2	0	0	0	0
17506	ENSG00000121335	0.393485	-2.33918	3.88897	-0.60149	0.547514	NA	PRB2	653247	0.940998	0	2	0	0	0	0
17507	ENSG00000164047	0.393485	-2.33918	3.88897	-0.60149	0.547514	NA	CAMP	820	0.940998	0	2	0	0	0	0
17508	ENSG00000177112	0.393485	-2.33918	3.88897	-0.60149	0.547514	NA	MRVI1-AS1	100129827	0.940998	0	2	0	0	0	0
17509	ENSG00000179073	0.393485	-2.33918	3.88897	-0.60149	0.547514	NA	TAAR3	9288	0.940998	0	2	0	0	0	0
17510	ENSG00000206681	0.393485	-2.33918	3.88897	-0.60149	0.547514	NA	RNU6-730P	NA	0.940998	0	2	0	0	0	0
17511	ENSG00000225978	0.393485	-2.33918	3.88897	-0.60149	0.547514	NA	HAR1A	NA	0.940998	0	2	0	0	0	0
17512	ENSG00000227467	0.393485	-2.33918	3.88897	-0.60149	0.547514	NA	LINC01537	101928555	0.940998	0	2	0	0	0	0
17513	ENSG00000231473	0.393485	-2.33918	3.88897	-0.60149	0.547514	NA	LINC00441	100862704	0.940998	0	2	0	0	0	0
17514	ENSG00000234724	0.393485	-2.33918	3.88897	-0.60149	0.547514	NA	HDAC1P1	NA	0.940998	0	2	0	0	0	0
17515	ENSG00000235071	0.393485	-2.33918	3.88897	-0.60149	0.547514	NA	RP11-759L5.2	NA	0.940998	0	2	0	0	0	0
17516	ENSG00000236677	0.393485	-2.33918	3.88897	-0.60149	0.547514	NA	AP000688.11	NA	0.940998	0	2	0	0	0	0
17517	ENSG00000237274	0.393485	-2.33918	3.88897	-0.60149	0.547514	NA	GTF3AP1	NA	0.940998	0	2	0	0	0	0
17518	ENSG00000251408	0.393485	-2.33918	3.88897	-0.60149	0.547514	NA	RP11-586D19.2	NA	0.940998	0	2	0	0	0	0
17519	ENSG00000253183	0.393485	-2.33918	3.88897	-0.60149	0.547514	NA	RP4-701O16.5	NA	0.940998	0	2	0	0	0	0
17520	ENSG00000253585	0.393485	-2.33918	3.88897	-0.60149	0.547514	NA	KB-1184D12.1	NA	0.940998	0	2	0	0	0	0
17521	ENSG00000254748	0.393485	-2.33918	3.88897	-0.60149	0.547514	NA	HNRNPCP8	NA	0.940998	0	2	0	0	0	0
17522	ENSG00000260558	0.393485	-2.33918	3.88897	-0.60149	0.547514	NA	RP11-63M22.1	NA	0.940998	0	2	0	0	0	0
17523	ENSG00000263724	0.393485	-2.33918	3.88897	-0.60149	0.547514	NA	DLGAP1-AS3	201477	0.940998	0	2	0	0	0	0
17524	ENSG00000267673	0.393485	-2.33918	3.88897	-0.60149	0.547514	NA	FDX2	112812	0.940998	0	2	0	0	0	0
17525	ENSG00000270236	0.393485	-2.33918	3.88897	-0.60149	0.547514	NA	RP11-265B8.5	NA	0.940998	0	2	0	0	0	0
17526	ENSG00000272209	0.393485	-2.33918	3.88897	-0.60149	0.547514	NA	RP3-500L14.2	NA	0.940998	0	2	0	0	0	0
17527	ENSG00000272940	0.393485	-2.33918	3.88897	-0.60149	0.547514	NA	CTA-384D8.33	NA	0.940998	0	2	0	0	0	0
17528	ENSG00000285367	0.393485	-2.33918	3.88897	-0.60149	0.547514	NA	NA	NA	0.940998	0	2	0	0	0	0
17529	ENSG00000285554	0.393485	-2.33918	3.88897	-0.60149	0.547514	NA	NA	NA	0.940998	0	2	0	0	0	0
4049	ENSG00000275395	185.12	-2.33755	0.652618	-3.58181	0.000341224	0.00149603	FCGBP	8857	0.00260052	112	556	259	57	51	75
3623	ENSG00000237668	19.9611	-2.33668	0.610563	-3.8271	0.000129662	0.000635296	RPS15AP38	NA	0.00110432	25	32	43	13	3	4
13678	ENSG00000285851	0.906919	-2.33439	2.39735	-0.973736	0.330188	NA	NA	NA	0.744914	1	0	3	0	0	1
13729	ENSG00000214248	0.891733	-2.33435	2.40884	-0.969078	0.332506	NA	CTD-3193O13.12	NA	0.747358	1	0	3	1	0	0
13569	ENSG00000238172	0.905872	-2.33293	2.36993	-0.984386	0.324926	NA	RPS2P35	NA	0.738876	2	0	2	0	0	1
13570	ENSG00000278995	0.905872	-2.33293	2.36993	-0.984386	0.324926	NA	Z69720.3	NA	0.738876	2	0	2	0	0	1
13579	ENSG00000170890	0.900376	-2.33292	2.37406	-0.98267	0.32577	NA	PLA2G1B	5319	0.740305	2	0	2	0	1	0
13693	ENSG00000273102	0.904825	-2.33126	2.39865	-0.971906	0.331097	NA	AP000569.9	NA	0.746148	3	0	1	0	0	1
13717	ENSG00000266200	0.899329	-2.33124	2.40278	-0.970225	0.331934	NA	PNLIPRP2	5408	0.746643	3	0	1	0	1	0
13756	ENSG00000096088	0.889639	-2.33121	2.41017	-0.967239	0.333425	NA	PGC	5225	0.747897	3	0	1	1	0	0
13757	ENSG00000237005	0.889639	-2.33121	2.41017	-0.967239	0.333425	NA	HIGD1AP15	NA	0.747897	3	0	1	1	0	0
12383	ENSG00000268234	1.63515	-2.33061	2.02779	-1.14934	0.250417	NA	FKBP4P6	NA	0.62403	0	7	1	2	0	0
9420	ENSG00000196420	2.52214	-2.32002	1.3736	-1.68901	0.0912184	0.175136	S100A5	6276	0.298813	5	2	6	1	1	1
16444	ENSG00000092054	0.386867	-2.31765	3.46858	-0.668183	0.504016	NA	MYH7	4625	0.934765	0	1	1	0	0	0
16445	ENSG00000106436	0.386867	-2.31765	3.46858	-0.668183	0.504016	NA	MYL10	93408	0.934765	0	1	1	0	0	0
16446	ENSG00000146192	0.386867	-2.31765	3.46858	-0.668183	0.504016	NA	FGD2	221472	0.934765	0	1	1	0	0	0
16447	ENSG00000160396	0.386867	-2.31765	3.46858	-0.668183	0.504016	NA	HIPK4	147746	0.934765	0	1	1	0	0	0
16448	ENSG00000164303	0.386867	-2.31765	3.46858	-0.668183	0.504016	NA	ENPP6	133121	0.934765	0	1	1	0	0	0
16449	ENSG00000167346	0.386867	-2.31765	3.46858	-0.668183	0.504016	NA	MMP26	56547	0.934765	0	1	1	0	0	0
16450	ENSG00000176970	0.386867	-2.31765	3.46858	-0.668183	0.504016	NA	RPL7L1P11	NA	0.934765	0	1	1	0	0	0
16451	ENSG00000177191	0.386867	-2.31765	3.46858	-0.668183	0.504016	NA	B3GNT8	374907	0.934765	0	1	1	0	0	0
16452	ENSG00000177468	0.386867	-2.31765	3.46858	-0.668183	0.504016	NA	OLIG3	167826	0.934765	0	1	1	0	0	0
16453	ENSG00000205537	0.386867	-2.31765	3.46858	-0.668183	0.504016	NA	RP11-89H19.1	NA	0.934765	0	1	1	0	0	0
16454	ENSG00000213026	0.386867	-2.31765	3.46858	-0.668183	0.504016	NA	CFL1P4	NA	0.934765	0	1	1	0	0	0
16455	ENSG00000213695	0.386867	-2.31765	3.46858	-0.668183	0.504016	NA	RPS7P14	NA	0.934765	0	1	1	0	0	0
16456	ENSG00000215326	0.386867	-2.31765	3.46858	-0.668183	0.504016	NA	GPX1P2	NA	0.934765	0	1	1	0	0	0
16457	ENSG00000215456	0.386867	-2.31765	3.46858	-0.668183	0.504016	NA	BCRP4	NA	0.934765	0	1	1	0	0	0
16458	ENSG00000224961	0.386867	-2.31765	3.46858	-0.668183	0.504016	NA	RP1-278O22.1	NA	0.934765	0	1	1	0	0	0
16459	ENSG00000225308	0.386867	-2.31765	3.46858	-0.668183	0.504016	NA	ASS1P11	NA	0.934765	0	1	1	0	0	0
16460	ENSG00000226969	0.386867	-2.31765	3.46858	-0.668183	0.504016	NA	RP11-547D24.3	NA	0.934765	0	1	1	0	0	0
16461	ENSG00000227018	0.386867	-2.31765	3.46858	-0.668183	0.504016	NA	IL6STP1	NA	0.934765	0	1	1	0	0	0
16462	ENSG00000227107	0.386867	-2.31765	3.46858	-0.668183	0.504016	NA	AC096574.5	NA	0.934765	0	1	1	0	0	0
16463	ENSG00000227244	0.386867	-2.31765	3.46858	-0.668183	0.504016	NA	LINC00845	100507058	0.934765	0	1	1	0	0	0
16464	ENSG00000227932	0.386867	-2.31765	3.46858	-0.668183	0.504016	NA	RP13-16H11.9	NA	0.934765	0	1	1	0	0	0
16465	ENSG00000228208	0.386867	-2.31765	3.46858	-0.668183	0.504016	NA	C1orf143	NA	0.934765	0	1	1	0	0	0
16466	ENSG00000228430	0.386867	-2.31765	3.46858	-0.668183	0.504016	NA	RP11-15B24.5	NA	0.934765	0	1	1	0	0	0
16467	ENSG00000230309	0.386867	-2.31765	3.46858	-0.668183	0.504016	NA	RP3-390M24.1	NA	0.934765	0	1	1	0	0	0
16468	ENSG00000231704	0.386867	-2.31765	3.46858	-0.668183	0.504016	NA	AC004895.4	NA	0.934765	0	1	1	0	0	0
16469	ENSG00000232883	0.386867	-2.31765	3.46858	-0.668183	0.504016	NA	RP11-302I18.1	NA	0.934765	0	1	1	0	0	0
16470	ENSG00000233287	0.386867	-2.31765	3.46858	-0.668183	0.504016	NA	AC009362.2	NA	0.934765	0	1	1	0	0	0
16471	ENSG00000233467	0.386867	-2.31765	3.46858	-0.668183	0.504016	NA	U40455.1	NA	0.934765	0	1	1	0	0	0
16472	ENSG00000234584	0.386867	-2.31765	3.46858	-0.668183	0.504016	NA	AC019186.1	NA	0.934765	0	1	1	0	0	0
16473	ENSG00000234949	0.386867	-2.31765	3.46858	-0.668183	0.504016	NA	AC104667.3	105373958	0.934765	0	1	1	0	0	0
16474	ENSG00000236908	0.386867	-2.31765	3.46858	-0.668183	0.504016	NA	RP5-1063M23.2	NA	0.934765	0	1	1	0	0	0
16475	ENSG00000241746	0.386867	-2.31765	3.46858	-0.668183	0.504016	NA	RP11-941H19.1	NA	0.934765	0	1	1	0	0	0
16476	ENSG00000244280	0.386867	-2.31765	3.46858	-0.668183	0.504016	NA	ECEL1P2	347694	0.934765	0	1	1	0	0	0
16477	ENSG00000249176	0.386867	-2.31765	3.46858	-0.668183	0.504016	NA	RP11-304F15.5	NA	0.934765	0	1	1	0	0	0
16478	ENSG00000250107	0.386867	-2.31765	3.46858	-0.668183	0.504016	NA	CACNA1G-AS1	253962	0.934765	0	1	1	0	0	0
16479	ENSG00000250421	0.386867	-2.31765	3.46858	-0.668183	0.504016	NA	RP11-83M16.6	NA	0.934765	0	1	1	0	0	0
16480	ENSG00000250982	0.386867	-2.31765	3.46858	-0.668183	0.504016	NA	RP11-159J3.1	NA	0.934765	0	1	1	0	0	0
16481	ENSG00000255847	0.386867	-2.31765	3.46858	-0.668183	0.504016	NA	RP11-167N4.2	NA	0.934765	0	1	1	0	0	0
16482	ENSG00000256916	0.386867	-2.31765	3.46858	-0.668183	0.504016	NA	RP11-817J15.2	NA	0.934765	0	1	1	0	0	0
16483	ENSG00000260395	0.386867	-2.31765	3.46858	-0.668183	0.504016	NA	CTD-2649C14.1	NA	0.934765	0	1	1	0	0	0
16484	ENSG00000260790	0.386867	-2.31765	3.46858	-0.668183	0.504016	NA	RP11-21M24.2	NA	0.934765	0	1	1	0	0	0
16485	ENSG00000264943	0.386867	-2.31765	3.46858	-0.668183	0.504016	NA	SH3GL1P2	NA	0.934765	0	1	1	0	0	0
16486	ENSG00000266498	0.386867	-2.31765	3.46858	-0.668183	0.504016	NA	RP11-45M22.5	NA	0.934765	0	1	1	0	0	0
16487	ENSG00000272006	0.386867	-2.31765	3.46858	-0.668183	0.504016	NA	RP11-583F2.6	NA	0.934765	0	1	1	0	0	0
16488	ENSG00000272023	0.386867	-2.31765	3.46858	-0.668183	0.504016	NA	CTC-350I8.1	NA	0.934765	0	1	1	0	0	0
16489	ENSG00000272243	0.386867	-2.31765	3.46858	-0.668183	0.504016	NA	RP11-554D15.3	NA	0.934765	0	1	1	0	0	0
16490	ENSG00000272795	0.386867	-2.31765	3.46858	-0.668183	0.504016	NA	RP11-602N24.3	NA	0.934765	0	1	1	0	0	0
16491	ENSG00000273192	0.386867	-2.31765	3.46858	-0.668183	0.504016	NA	CITF22-1A6.3	NA	0.934765	0	1	1	0	0	0
16492	ENSG00000273264	0.386867	-2.31765	3.46858	-0.668183	0.504016	NA	RP11-131L23.2	NA	0.934765	0	1	1	0	0	0
16493	ENSG00000278677	0.386867	-2.31765	3.46858	-0.668183	0.504016	NA	HIST1H2AM	8336	0.934765	0	1	1	0	0	0
16494	ENSG00000278705	0.386867	-2.31765	3.46858	-0.668183	0.504016	NA	HIST1H4B	8366	0.934765	0	1	1	0	0	0
16495	ENSG00000280160	0.386867	-2.31765	3.46858	-0.668183	0.504016	NA	RP11-196G11.3	NA	0.934765	0	1	1	0	0	0
16496	ENSG00000283010	0.386867	-2.31765	3.46858	-0.668183	0.504016	NA	RP1-273N12.4	NA	0.934765	0	1	1	0	0	0
16497	ENSG00000284830	0.386867	-2.31765	3.46858	-0.668183	0.504016	NA	NA	NA	0.934765	0	1	1	0	0	0
16498	ENSG00000285894	0.386867	-2.31765	3.46858	-0.668183	0.504016	NA	NA	NA	0.934765	0	1	1	0	0	0
16520	ENSG00000047617	0.38582	-2.31441	3.47186	-0.666621	0.505014	NA	ANO2	57101	0.934765	1	1	0	0	0	0
16521	ENSG00000050767	0.38582	-2.31441	3.47186	-0.666621	0.505014	NA	COL23A1	91522	0.934765	1	1	0	0	0	0
16522	ENSG00000078898	0.38582	-2.31441	3.47186	-0.666621	0.505014	NA	BPIFB2	80341	0.934765	1	1	0	0	0	0
16523	ENSG00000100433	0.38582	-2.31441	3.47186	-0.666621	0.505014	NA	KCNK10	54207	0.934765	1	1	0	0	0	0
16524	ENSG00000104055	0.38582	-2.31441	3.47186	-0.666621	0.505014	NA	TGM5	9333	0.934765	1	1	0	0	0	0
16525	ENSG00000120471	0.38582	-2.31441	3.47186	-0.666621	0.505014	NA	TP53AIP1	63970	0.934765	1	1	0	0	0	0
16526	ENSG00000120949	0.38582	-2.31441	3.47186	-0.666621	0.505014	NA	TNFRSF8	943	0.934765	1	1	0	0	0	0
16527	ENSG00000129221	0.38582	-2.31441	3.47186	-0.666621	0.505014	NA	AIPL1	23746	0.934765	1	1	0	0	0	0
16528	ENSG00000133063	0.38582	-2.31441	3.47186	-0.666621	0.505014	NA	CHIT1	1118	0.934765	1	1	0	0	0	0
16529	ENSG00000140090	0.38582	-2.31441	3.47186	-0.666621	0.505014	NA	SLC24A4	123041	0.934765	1	1	0	0	0	0
16530	ENSG00000140798	0.38582	-2.31441	3.47186	-0.666621	0.505014	NA	ABCC12	94160	0.934765	1	1	0	0	0	0
16531	ENSG00000144868	0.38582	-2.31441	3.47186	-0.666621	0.505014	NA	TMEM108	66000	0.934765	1	1	0	0	0	0
16532	ENSG00000154162	0.38582	-2.31441	3.47186	-0.666621	0.505014	NA	CDH12	1010	0.934765	1	1	0	0	0	0
16533	ENSG00000163331	0.38582	-2.31441	3.47186	-0.666621	0.505014	NA	DAPL1	92196	0.934765	1	1	0	0	0	0
16534	ENSG00000170374	0.38582	-2.31441	3.47186	-0.666621	0.505014	NA	SP7	121340	0.934765	1	1	0	0	0	0
16535	ENSG00000177398	0.38582	-2.31441	3.47186	-0.666621	0.505014	NA	UMODL1	89766	0.934765	1	1	0	0	0	0
16536	ENSG00000183230	0.38582	-2.31441	3.47186	-0.666621	0.505014	NA	CTNNA3	29119	0.934765	1	1	0	0	0	0
16537	ENSG00000183454	0.38582	-2.31441	3.47186	-0.666621	0.505014	NA	GRIN2A	2903	0.934765	1	1	0	0	0	0
16538	ENSG00000189064	0.38582	-2.31441	3.47186	-0.666621	0.505014	NA	GAGE2A	100101629	0.934765	1	1	0	0	0	0
16539	ENSG00000198483	0.38582	-2.31441	3.47186	-0.666621	0.505014	NA	ANKRD35	148741	0.934765	1	1	0	0	0	0
16540	ENSG00000204277	0.38582	-2.31441	3.47186	-0.666621	0.505014	NA	RP11-219G17.4	100996291	0.934765	1	1	0	0	0	0
16541	ENSG00000213399	0.38582	-2.31441	3.47186	-0.666621	0.505014	NA	AC022210.2	NA	0.934765	1	1	0	0	0	0
16542	ENSG00000215467	0.38582	-2.31441	3.47186	-0.666621	0.505014	NA	RPL27AP	NA	0.934765	1	1	0	0	0	0
16543	ENSG00000215572	0.38582	-2.31441	3.47186	-0.666621	0.505014	NA	ESRRAP1	NA	0.934765	1	1	0	0	0	0
16544	ENSG00000223865	0.38582	-2.31441	3.47186	-0.666621	0.505014	NA	HLA-DPB1	3115	0.934765	1	1	0	0	0	0
16545	ENSG00000226428	0.38582	-2.31441	3.47186	-0.666621	0.505014	NA	RP11-106M7.4	NA	0.934765	1	1	0	0	0	0
16546	ENSG00000227159	0.38582	-2.31441	3.47186	-0.666621	0.505014	NA	DDX11L16	NA	0.934765	1	1	0	0	0	0
16547	ENSG00000228528	0.38582	-2.31441	3.47186	-0.666621	0.505014	NA	AC068057.1	NA	0.934765	1	1	0	0	0	0
16548	ENSG00000228639	0.38582	-2.31441	3.47186	-0.666621	0.505014	NA	AC005152.3	102723505	0.934765	1	1	0	0	0	0
16549	ENSG00000233125	0.38582	-2.31441	3.47186	-0.666621	0.505014	NA	ACTBP12	NA	0.934765	1	1	0	0	0	0
16550	ENSG00000233952	0.38582	-2.31441	3.47186	-0.666621	0.505014	NA	FTLP15	NA	0.934765	1	1	0	0	0	0
16551	ENSG00000234571	0.38582	-2.31441	3.47186	-0.666621	0.505014	NA	RP5-998N21.4	NA	0.934765	1	1	0	0	0	0
16552	ENSG00000242731	0.38582	-2.31441	3.47186	-0.666621	0.505014	NA	FAM86LP	NA	0.934765	1	1	0	0	0	0
16553	ENSG00000244527	0.38582	-2.31441	3.47186	-0.666621	0.505014	NA	RP11-254G11.1	NA	0.934765	1	1	0	0	0	0
16554	ENSG00000248358	0.38582	-2.31441	3.47186	-0.666621	0.505014	NA	AE000658.31	NA	0.934765	1	1	0	0	0	0
16555	ENSG00000249304	0.38582	-2.31441	3.47186	-0.666621	0.505014	NA	RP11-26P13.2	NA	0.934765	1	1	0	0	0	0
16556	ENSG00000251835	0.38582	-2.31441	3.47186	-0.666621	0.505014	NA	RNU6ATAC32P	NA	0.934765	1	1	0	0	0	0
16557	ENSG00000253182	0.38582	-2.31441	3.47186	-0.666621	0.505014	NA	RP11-486M23.2	NA	0.934765	1	1	0	0	0	0
16558	ENSG00000256377	0.38582	-2.31441	3.47186	-0.666621	0.505014	NA	RP11-1060J15.4	NA	0.934765	1	1	0	0	0	0
16559	ENSG00000257058	0.38582	-2.31441	3.47186	-0.666621	0.505014	NA	RP11-864I4.4	NA	0.934765	1	1	0	0	0	0
16560	ENSG00000258177	0.38582	-2.31441	3.47186	-0.666621	0.505014	NA	RP11-394J1.2	NA	0.934765	1	1	0	0	0	0
16561	ENSG00000261790	0.38582	-2.31441	3.47186	-0.666621	0.505014	NA	AC005606.14	NA	0.934765	1	1	0	0	0	0
16562	ENSG00000264179	0.38582	-2.31441	3.47186	-0.666621	0.505014	NA	RP11-672L10.5	NA	0.934765	1	1	0	0	0	0
16563	ENSG00000267218	0.38582	-2.31441	3.47186	-0.666621	0.505014	NA	AC005336.5	NA	0.934765	1	1	0	0	0	0
16564	ENSG00000272672	0.38582	-2.31441	3.47186	-0.666621	0.505014	NA	RP11-302M6.5	NA	0.934765	1	1	0	0	0	0
16565	ENSG00000273877	0.38582	-2.31441	3.47186	-0.666621	0.505014	NA	RP11-635O16.2	105373373	0.934765	1	1	0	0	0	0
16566	ENSG00000274274	0.38582	-2.31441	3.47186	-0.666621	0.505014	NA	GAGE13	645037	0.934765	1	1	0	0	0	0
16567	ENSG00000275966	0.38582	-2.31441	3.47186	-0.666621	0.505014	NA	RP11-1055B8.9	NA	0.934765	1	1	0	0	0	0
16568	ENSG00000284299	0.38582	-2.31441	3.47186	-0.666621	0.505014	NA	NA	NA	0.934765	1	1	0	0	0	0
10	ENSG00000117984	2814.87	-2.31412	0.183272	-12.6267	1.50457e-36	2.67092e-33	CTSD	1509	4.64281e-33	4207	5172	4684	1127	768	933
3472	ENSG00000173467	15.9229	-2.30995	0.591379	-3.90604	9.38211e-05	0.000479698	AGR3	155465	0.000833851	19	26	34	4	8	4
5306	ENSG00000204052	8.312	-2.30674	0.7752	-2.97567	0.00292348	0.00978093	LRRC73	221424	0.017002	11	15	15	3	3	2
1264	ENSG00000161544	93.4219	-2.30098	0.397249	-5.7923	6.94285e-09	9.75075e-08	CYGB	114757	1.69496e-07	223	90	153	33	46	16
3079	ENSG00000163295	28.3894	-2.30082	0.555504	-4.14186	3.44501e-05	0.000198623	ALPI	248	0.000345262	16	74	51	9	9	12
17804	ENSG00000070886	0.380248	-2.29667	3.93953	-0.582982	0.559906	NA	EPHA8	2046	0.940998	0	0	2	0	0	0
17805	ENSG00000079215	0.380248	-2.29667	3.93953	-0.582982	0.559906	NA	SLC1A3	6507	0.940998	0	0	2	0	0	0
17806	ENSG00000105122	0.380248	-2.29667	3.93953	-0.582982	0.559906	NA	RASAL3	64926	0.940998	0	0	2	0	0	0
17807	ENSG00000143839	0.380248	-2.29667	3.93953	-0.582982	0.559906	NA	REN	5972	0.940998	0	0	2	0	0	0
17808	ENSG00000149452	0.380248	-2.29667	3.93953	-0.582982	0.559906	NA	SLC22A8	9376	0.940998	0	0	2	0	0	0
17809	ENSG00000163515	0.380248	-2.29667	3.93953	-0.582982	0.559906	NA	RETNLB	84666	0.940998	0	0	2	0	0	0
17810	ENSG00000177306	0.380248	-2.29667	3.93953	-0.582982	0.559906	NA	OR7E125P	NA	0.940998	0	0	2	0	0	0
17811	ENSG00000186074	0.380248	-2.29667	3.93953	-0.582982	0.559906	NA	CD300LF	146722	0.940998	0	0	2	0	0	0
17812	ENSG00000187556	0.380248	-2.29667	3.93953	-0.582982	0.559906	NA	NANOS3	342977	0.940998	0	0	2	0	0	0
17813	ENSG00000187848	0.380248	-2.29667	3.93953	-0.582982	0.559906	NA	P2RX2	22953	0.940998	0	0	2	0	0	0
17814	ENSG00000188937	0.380248	-2.29667	3.93953	-0.582982	0.559906	NA	NYX	60506	0.940998	0	0	2	0	0	0
17815	ENSG00000189052	0.380248	-2.29667	3.93953	-0.582982	0.559906	NA	CGB5	93659	0.940998	0	0	2	0	0	0
17816	ENSG00000200354	0.380248	-2.29667	3.93953	-0.582982	0.559906	NA	SNORA71D	677840	0.940998	0	0	2	0	0	0
17817	ENSG00000202290	0.380248	-2.29667	3.93953	-0.582982	0.559906	NA	RNA5SP37	NA	0.940998	0	0	2	0	0	0
17818	ENSG00000207525	0.380248	-2.29667	3.93953	-0.582982	0.559906	NA	Y_RNA	NA	0.940998	0	0	2	0	0	0
17819	ENSG00000220884	0.380248	-2.29667	3.93953	-0.582982	0.559906	NA	MESTP1	NA	0.940998	0	0	2	0	0	0
17820	ENSG00000225195	0.380248	-2.29667	3.93953	-0.582982	0.559906	NA	RP11-338E21.2	NA	0.940998	0	0	2	0	0	0
17821	ENSG00000230568	0.380248	-2.29667	3.93953	-0.582982	0.559906	NA	SF3A3P1	NA	0.940998	0	0	2	0	0	0
17822	ENSG00000233343	0.380248	-2.29667	3.93953	-0.582982	0.559906	NA	ATP6V1G1P4	NA	0.940998	0	0	2	0	0	0
17823	ENSG00000233924	0.380248	-2.29667	3.93953	-0.582982	0.559906	NA	RPSAP13	NA	0.940998	0	0	2	0	0	0
17824	ENSG00000234030	0.380248	-2.29667	3.93953	-0.582982	0.559906	NA	TMEM97P1	NA	0.940998	0	0	2	0	0	0
17825	ENSG00000234152	0.380248	-2.29667	3.93953	-0.582982	0.559906	NA	TCEB2P1	NA	0.940998	0	0	2	0	0	0
17826	ENSG00000236680	0.380248	-2.29667	3.93953	-0.582982	0.559906	NA	RP11-296P7.4	NA	0.940998	0	0	2	0	0	0
17827	ENSG00000236875	0.380248	-2.29667	3.93953	-0.582982	0.559906	NA	DDX11L5	NA	0.940998	0	0	2	0	0	0
17828	ENSG00000236948	0.380248	-2.29667	3.93953	-0.582982	0.559906	NA	RP11-154H17.1	NA	0.940998	0	0	2	0	0	0
17829	ENSG00000237646	0.380248	-2.29667	3.93953	-0.582982	0.559906	NA	HLCS-IT1	NA	0.940998	0	0	2	0	0	0
17830	ENSG00000237836	0.380248	-2.29667	3.93953	-0.582982	0.559906	NA	PHKA2-AS1	NA	0.940998	0	0	2	0	0	0
17831	ENSG00000241157	0.380248	-2.29667	3.93953	-0.582982	0.559906	NA	RP11-3K24.1	NA	0.940998	0	0	2	0	0	0
17832	ENSG00000244036	0.380248	-2.29667	3.93953	-0.582982	0.559906	NA	RP11-306G20.1	NA	0.940998	0	0	2	0	0	0
17833	ENSG00000244585	0.380248	-2.29667	3.93953	-0.582982	0.559906	NA	RPL12P33	NA	0.940998	0	0	2	0	0	0
17834	ENSG00000248753	0.380248	-2.29667	3.93953	-0.582982	0.559906	NA	CTC-276P9.2	NA	0.940998	0	0	2	0	0	0
17835	ENSG00000248925	0.380248	-2.29667	3.93953	-0.582982	0.559906	NA	CTD-2083E4.6	NA	0.940998	0	0	2	0	0	0
17836	ENSG00000249109	0.380248	-2.29667	3.93953	-0.582982	0.559906	NA	RP11-1026M7.2	NA	0.940998	0	0	2	0	0	0
17837	ENSG00000249680	0.380248	-2.29667	3.93953	-0.582982	0.559906	NA	TUBA3GP	NA	0.940998	0	0	2	0	0	0
17838	ENSG00000250098	0.380248	-2.29667	3.93953	-0.582982	0.559906	NA	RP11-22A3.1	NA	0.940998	0	0	2	0	0	0
17839	ENSG00000254715	0.380248	-2.29667	3.93953	-0.582982	0.559906	NA	OR7E154P	NA	0.940998	0	0	2	0	0	0
17840	ENSG00000256995	0.380248	-2.29667	3.93953	-0.582982	0.559906	NA	RP11-114G22.1	NA	0.940998	0	0	2	0	0	0
17841	ENSG00000257193	0.380248	-2.29667	3.93953	-0.582982	0.559906	NA	RP11-818F20.4	NA	0.940998	0	0	2	0	0	0
17842	ENSG00000258451	0.380248	-2.29667	3.93953	-0.582982	0.559906	NA	RP11-903H12.3	NA	0.940998	0	0	2	0	0	0
17843	ENSG00000258927	0.380248	-2.29667	3.93953	-0.582982	0.559906	NA	RP11-1070N10.5	NA	0.940998	0	0	2	0	0	0
17844	ENSG00000259770	0.380248	-2.29667	3.93953	-0.582982	0.559906	NA	RP11-81A1.3	NA	0.940998	0	0	2	0	0	0
17845	ENSG00000270598	0.380248	-2.29667	3.93953	-0.582982	0.559906	NA	RP11-396C23.3	NA	0.940998	0	0	2	0	0	0
17846	ENSG00000272483	0.380248	-2.29667	3.93953	-0.582982	0.559906	NA	RP11-169K17.3	NA	0.940998	0	0	2	0	0	0
17847	ENSG00000273464	0.380248	-2.29667	3.93953	-0.582982	0.559906	NA	RP11-313P22.1	NA	0.940998	0	0	2	0	0	0
17848	ENSG00000274100	0.380248	-2.29667	3.93953	-0.582982	0.559906	NA	RP11-12A20.13	NA	0.940998	0	0	2	0	0	0
17849	ENSG00000275371	0.380248	-2.29667	3.93953	-0.582982	0.559906	NA	RP11-455F5.6	NA	0.940998	0	0	2	0	0	0
17850	ENSG00000278301	0.380248	-2.29667	3.93953	-0.582982	0.559906	NA	GRAMD4P3	NA	0.940998	0	0	2	0	0	0
17851	ENSG00000278607	0.380248	-2.29667	3.93953	-0.582982	0.559906	NA	RP11-405M12.3	NA	0.940998	0	0	2	0	0	0
17852	ENSG00000280331	0.380248	-2.29667	3.93953	-0.582982	0.559906	NA	RP11-545D22.1	NA	0.940998	0	0	2	0	0	0
17853	ENSG00000284428	0.380248	-2.29667	3.93953	-0.582982	0.559906	NA	NA	NA	0.940998	0	0	2	0	0	0
16764	ENSG00000107018	0.379201	-2.29394	3.49291	-0.656741	0.511347	NA	RLN1	6013	0.937951	1	0	1	0	0	0
16765	ENSG00000123560	0.379201	-2.29394	3.49291	-0.656741	0.511347	NA	PLP1	5354	0.937951	1	0	1	0	0	0
16766	ENSG00000123572	0.379201	-2.29394	3.49291	-0.656741	0.511347	NA	NRK	203447	0.937951	1	0	1	0	0	0
16767	ENSG00000126262	0.379201	-2.29394	3.49291	-0.656741	0.511347	NA	FFAR2	2867	0.937951	1	0	1	0	0	0
16768	ENSG00000128040	0.379201	-2.29394	3.49291	-0.656741	0.511347	NA	SPINK2	6691	0.937951	1	0	1	0	0	0
16769	ENSG00000148948	0.379201	-2.29394	3.49291	-0.656741	0.511347	NA	LRRC4C	57689	0.937951	1	0	1	0	0	0
16770	ENSG00000162747	0.379201	-2.29394	3.49291	-0.656741	0.511347	NA	FCGR3B	2215	0.937951	1	0	1	0	0	0
16771	ENSG00000166923	0.379201	-2.29394	3.49291	-0.656741	0.511347	NA	GREM1	26585	0.937951	1	0	1	0	0	0
16772	ENSG00000170925	0.379201	-2.29394	3.49291	-0.656741	0.511347	NA	TEX13B	56156	0.937951	1	0	1	0	0	0
16773	ENSG00000172236	0.379201	-2.29394	3.49291	-0.656741	0.511347	NA	TPSAB1	7177	0.937951	1	0	1	0	0	0
16774	ENSG00000174697	0.379201	-2.29394	3.49291	-0.656741	0.511347	NA	LEP	3952	0.937951	1	0	1	0	0	0
16775	ENSG00000175262	0.379201	-2.29394	3.49291	-0.656741	0.511347	NA	C1orf127	148345	0.937951	1	0	1	0	0	0
16776	ENSG00000179363	0.379201	-2.29394	3.49291	-0.656741	0.511347	NA	TMEM31	203562	0.937951	1	0	1	0	0	0
16777	ENSG00000182674	0.379201	-2.29394	3.49291	-0.656741	0.511347	NA	KCNB2	9312	0.937951	1	0	1	0	0	0
16778	ENSG00000183166	0.379201	-2.29394	3.49291	-0.656741	0.511347	NA	CALN1	83698	0.937951	1	0	1	0	0	0
16779	ENSG00000184544	0.379201	-2.29394	3.49291	-0.656741	0.511347	NA	DHRS7C	201140	0.937951	1	0	1	0	0	0
16780	ENSG00000186234	0.379201	-2.29394	3.49291	-0.656741	0.511347	NA	FAM86MP	NA	0.937951	1	0	1	0	0	0
16781	ENSG00000186439	0.379201	-2.29394	3.49291	-0.656741	0.511347	NA	TRDN	10345	0.937951	1	0	1	0	0	0
16782	ENSG00000198010	0.379201	-2.29394	3.49291	-0.656741	0.511347	NA	DLGAP2	619343	0.937951	1	0	1	0	0	0
16783	ENSG00000204661	0.379201	-2.29394	3.49291	-0.656741	0.511347	NA	C5orf60	NA	0.937951	1	0	1	0	0	0
16784	ENSG00000204872	0.379201	-2.29394	3.49291	-0.656741	0.511347	NA	NAT8B	51471	0.937951	1	0	1	0	0	0
16785	ENSG00000208037	0.379201	-2.29394	3.49291	-0.656741	0.511347	NA	MIR320A	407037	0.937951	1	0	1	0	0	0
16786	ENSG00000214297	0.379201	-2.29394	3.49291	-0.656741	0.511347	NA	ALDOAP2	NA	0.937951	1	0	1	0	0	0
16787	ENSG00000218180	0.379201	-2.29394	3.49291	-0.656741	0.511347	NA	SLC25A5P7	NA	0.937951	1	0	1	0	0	0
16788	ENSG00000223779	0.379201	-2.29394	3.49291	-0.656741	0.511347	NA	RP11-403I13.4	NA	0.937951	1	0	1	0	0	0
16789	ENSG00000226279	0.379201	-2.29394	3.49291	-0.656741	0.511347	NA	RPL12P10	NA	0.937951	1	0	1	0	0	0
16790	ENSG00000228510	0.379201	-2.29394	3.49291	-0.656741	0.511347	NA	RP11-339B21.8	NA	0.937951	1	0	1	0	0	0
16791	ENSG00000228741	0.379201	-2.29394	3.49291	-0.656741	0.511347	NA	SPATA13	221178	0.937951	1	0	1	0	0	0
16792	ENSG00000228809	0.379201	-2.29394	3.49291	-0.656741	0.511347	NA	RP4-705D16.3	NA	0.937951	1	0	1	0	0	0
16793	ENSG00000230362	0.379201	-2.29394	3.49291	-0.656741	0.511347	NA	ACTG1P23	NA	0.937951	1	0	1	0	0	0
16794	ENSG00000230747	0.379201	-2.29394	3.49291	-0.656741	0.511347	NA	AC021188.4	NA	0.937951	1	0	1	0	0	0
16795	ENSG00000231569	0.379201	-2.29394	3.49291	-0.656741	0.511347	NA	RP11-399L7.3	NA	0.937951	1	0	1	0	0	0
16796	ENSG00000232467	0.379201	-2.29394	3.49291	-0.656741	0.511347	NA	TMA16P2	NA	0.937951	1	0	1	0	0	0
16797	ENSG00000233691	0.379201	-2.29394	3.49291	-0.656741	0.511347	NA	RP11-312J18.7	NA	0.937951	1	0	1	0	0	0
16798	ENSG00000235264	0.379201	-2.29394	3.49291	-0.656741	0.511347	NA	RPL5P28	NA	0.937951	1	0	1	0	0	0
16799	ENSG00000235876	0.379201	-2.29394	3.49291	-0.656741	0.511347	NA	FEM1AP4	NA	0.937951	1	0	1	0	0	0
16800	ENSG00000237447	0.379201	-2.29394	3.49291	-0.656741	0.511347	NA	CDC27P2	NA	0.937951	1	0	1	0	0	0
16801	ENSG00000237721	0.379201	-2.29394	3.49291	-0.656741	0.511347	NA	AF064858.11	NA	0.937951	1	0	1	0	0	0
16802	ENSG00000238222	0.379201	-2.29394	3.49291	-0.656741	0.511347	NA	MKRN4P	NA	0.937951	1	0	1	0	0	0
16803	ENSG00000240954	0.379201	-2.29394	3.49291	-0.656741	0.511347	NA	RPL4P1	NA	0.937951	1	0	1	0	0	0
16804	ENSG00000243023	0.379201	-2.29394	3.49291	-0.656741	0.511347	NA	UBA52P3	NA	0.937951	1	0	1	0	0	0
16805	ENSG00000244043	0.379201	-2.29394	3.49291	-0.656741	0.511347	NA	RPS27P27	NA	0.937951	1	0	1	0	0	0
16806	ENSG00000248223	0.379201	-2.29394	3.49291	-0.656741	0.511347	NA	CTD-2139B15.2	NA	0.937951	1	0	1	0	0	0
16807	ENSG00000248740	0.379201	-2.29394	3.49291	-0.656741	0.511347	NA	RP11-328K4.1	101929448	0.937951	1	0	1	0	0	0
16808	ENSG00000250101	0.379201	-2.29394	3.49291	-0.656741	0.511347	NA	RP11-1252I4.2	NA	0.937951	1	0	1	0	0	0
16809	ENSG00000250473	0.379201	-2.29394	3.49291	-0.656741	0.511347	NA	DUTP7	NA	0.937951	1	0	1	0	0	0
16810	ENSG00000250622	0.379201	-2.29394	3.49291	-0.656741	0.511347	NA	RP11-612J15.3	NA	0.937951	1	0	1	0	0	0
16811	ENSG00000251503	0.379201	-2.29394	3.49291	-0.656741	0.511347	NA	APITD1-CORT	100526739	0.937951	1	0	1	0	0	0
16812	ENSG00000253677	0.379201	-2.29394	3.49291	-0.656741	0.511347	NA	UBE2HP1	NA	0.937951	1	0	1	0	0	0
16813	ENSG00000255002	0.379201	-2.29394	3.49291	-0.656741	0.511347	NA	CTD-2509G16.2	100128233	0.937951	1	0	1	0	0	0
16814	ENSG00000258408	0.379201	-2.29394	3.49291	-0.656741	0.511347	NA	NT5CP2	NA	0.937951	1	0	1	0	0	0
16815	ENSG00000259786	0.379201	-2.29394	3.49291	-0.656741	0.511347	NA	CTD-2118P12.1	NA	0.937951	1	0	1	0	0	0
16816	ENSG00000260608	0.379201	-2.29394	3.49291	-0.656741	0.511347	NA	RP11-382A20.7	NA	0.937951	1	0	1	0	0	0
16817	ENSG00000267783	0.379201	-2.29394	3.49291	-0.656741	0.511347	NA	CTB-55O6.10	NA	0.937951	1	0	1	0	0	0
16818	ENSG00000269765	0.379201	-2.29394	3.49291	-0.656741	0.511347	NA	CTB-187L3.1	NA	0.937951	1	0	1	0	0	0
16819	ENSG00000270945	0.379201	-2.29394	3.49291	-0.656741	0.511347	NA	HSPE1P7	NA	0.937951	1	0	1	0	0	0
16820	ENSG00000273160	0.379201	-2.29394	3.49291	-0.656741	0.511347	NA	RP11-104L21.3	NA	0.937951	1	0	1	0	0	0
16821	ENSG00000276727	0.379201	-2.29394	3.49291	-0.656741	0.511347	NA	RP11-123K3.9	NA	0.937951	1	0	1	0	0	0
16822	ENSG00000280418	0.379201	-2.29394	3.49291	-0.656741	0.511347	NA	AC007326.10	NA	0.937951	1	0	1	0	0	0
16823	ENSG00000284731	0.379201	-2.29394	3.49291	-0.656741	0.511347	NA	NA	NA	0.937951	1	0	1	0	0	0
17887	ENSG00000011083	0.378154	-2.2898	3.94778	-0.580022	0.5619	NA	SLC6A7	6534	0.940998	2	0	0	0	0	0
17888	ENSG00000078328	0.378154	-2.2898	3.94778	-0.580022	0.5619	NA	RBFOX1	54715	0.940998	2	0	0	0	0	0
17889	ENSG00000111245	0.378154	-2.2898	3.94778	-0.580022	0.5619	NA	MYL2	4633	0.940998	2	0	0	0	0	0
17890	ENSG00000112303	0.378154	-2.2898	3.94778	-0.580022	0.5619	NA	VNN2	8875	0.940998	2	0	0	0	0	0
17891	ENSG00000112936	0.378154	-2.2898	3.94778	-0.580022	0.5619	NA	C7	730	0.940998	2	0	0	0	0	0
17892	ENSG00000124678	0.378154	-2.2898	3.94778	-0.580022	0.5619	NA	TCP11	6954	0.940998	2	0	0	0	0	0
17893	ENSG00000143921	0.378154	-2.2898	3.94778	-0.580022	0.5619	NA	ABCG8	64241	0.940998	2	0	0	0	0	0
17894	ENSG00000170426	0.378154	-2.2898	3.94778	-0.580022	0.5619	NA	SDR9C7	121214	0.940998	2	0	0	0	0	0
17895	ENSG00000174175	0.378154	-2.2898	3.94778	-0.580022	0.5619	NA	SELP	6403	0.940998	2	0	0	0	0	0
17896	ENSG00000178772	0.378154	-2.2898	3.94778	-0.580022	0.5619	NA	CPN2	1370	0.940998	2	0	0	0	0	0
17897	ENSG00000180438	0.378154	-2.2898	3.94778	-0.580022	0.5619	NA	TPRXL	348825	0.940998	2	0	0	0	0	0
17898	ENSG00000203710	0.378154	-2.2898	3.94778	-0.580022	0.5619	NA	CR1	1378	0.940998	2	0	0	0	0	0
17899	ENSG00000206579	0.378154	-2.2898	3.94778	-0.580022	0.5619	NA	XKR4	114786	0.940998	2	0	0	0	0	0
17900	ENSG00000206688	0.378154	-2.2898	3.94778	-0.580022	0.5619	NA	SNORD116-18	100033430	0.940998	2	0	0	0	0	0
17901	ENSG00000212695	0.378154	-2.2898	3.94778	-0.580022	0.5619	NA	RP11-134K1.2	NA	0.940998	2	0	0	0	0	0
17902	ENSG00000213058	0.378154	-2.2898	3.94778	-0.580022	0.5619	NA	RP4-765C7.2	NA	0.940998	2	0	0	0	0	0
17903	ENSG00000213318	0.378154	-2.2898	3.94778	-0.580022	0.5619	NA	RP11-331F4.1	NA	0.940998	2	0	0	0	0	0
17904	ENSG00000216412	0.378154	-2.2898	3.94778	-0.580022	0.5619	NA	RPL12P2	NA	0.940998	2	0	0	0	0	0
17905	ENSG00000228401	0.378154	-2.2898	3.94778	-0.580022	0.5619	NA	HSPC324	101928612	0.940998	2	0	0	0	0	0
17906	ENSG00000239593	0.378154	-2.2898	3.94778	-0.580022	0.5619	NA	RP11-477J21.6	NA	0.940998	2	0	0	0	0	0
17907	ENSG00000242088	0.378154	-2.2898	3.94778	-0.580022	0.5619	NA	AC090602.2	NA	0.940998	2	0	0	0	0	0
17908	ENSG00000244021	0.378154	-2.2898	3.94778	-0.580022	0.5619	NA	RP11-50D9.1	NA	0.940998	2	0	0	0	0	0
17909	ENSG00000244076	0.378154	-2.2898	3.94778	-0.580022	0.5619	NA	CTC-512J14.1	NA	0.940998	2	0	0	0	0	0
17910	ENSG00000245008	0.378154	-2.2898	3.94778	-0.580022	0.5619	NA	RP11-744N12.3	101929538	0.940998	2	0	0	0	0	0
17911	ENSG00000248757	0.378154	-2.2898	3.94778	-0.580022	0.5619	NA	CTD-2193G5.1	102467212	0.940998	2	0	0	0	0	0
17912	ENSG00000253692	0.378154	-2.2898	3.94778	-0.580022	0.5619	NA	IGHEP1	NA	0.940998	2	0	0	0	0	0
17913	ENSG00000254163	0.378154	-2.2898	3.94778	-0.580022	0.5619	NA	CTC-340I23.2	NA	0.940998	2	0	0	0	0	0
17914	ENSG00000254272	0.378154	-2.2898	3.94778	-0.580022	0.5619	NA	RP11-382J24.2	NA	0.940998	2	0	0	0	0	0
17915	ENSG00000255087	0.378154	-2.2898	3.94778	-0.580022	0.5619	NA	RP11-168K9.2	101929473	0.940998	2	0	0	0	0	0
17916	ENSG00000256288	0.378154	-2.2898	3.94778	-0.580022	0.5619	NA	RP11-277P12.10	NA	0.940998	2	0	0	0	0	0
17917	ENSG00000258355	0.378154	-2.2898	3.94778	-0.580022	0.5619	NA	RP11-651L5.2	NA	0.940998	2	0	0	0	0	0
17918	ENSG00000259106	0.378154	-2.2898	3.94778	-0.580022	0.5619	NA	RP11-242P2.2	NA	0.940998	2	0	0	0	0	0
17919	ENSG00000259257	0.378154	-2.2898	3.94778	-0.580022	0.5619	NA	RP11-616M17.1	NA	0.940998	2	0	0	0	0	0
17920	ENSG00000259413	0.378154	-2.2898	3.94778	-0.580022	0.5619	NA	RP11-5O23.1	NA	0.940998	2	0	0	0	0	0
17921	ENSG00000266479	0.378154	-2.2898	3.94778	-0.580022	0.5619	NA	CTD-2515C13.1	NA	0.940998	2	0	0	0	0	0
17922	ENSG00000266913	0.378154	-2.2898	3.94778	-0.580022	0.5619	NA	CTC-548K16.2	105372288	0.940998	2	0	0	0	0	0
17923	ENSG00000271727	0.378154	-2.2898	3.94778	-0.580022	0.5619	NA	RP11-532F6.4	NA	0.940998	2	0	0	0	0	0
17924	ENSG00000271766	0.378154	-2.2898	3.94778	-0.580022	0.5619	NA	CTD-2195M15.3	NA	0.940998	2	0	0	0	0	0
17925	ENSG00000273132	0.378154	-2.2898	3.94778	-0.580022	0.5619	NA	RP11-350J20.12	NA	0.940998	2	0	0	0	0	0
17926	ENSG00000274594	0.378154	-2.2898	3.94778	-0.580022	0.5619	NA	RP11-43P8.2	NA	0.940998	2	0	0	0	0	0
17927	ENSG00000276903	0.378154	-2.2898	3.94778	-0.580022	0.5619	NA	HIST1H2AL	8332	0.940998	2	0	0	0	0	0
17928	ENSG00000277743	0.378154	-2.2898	3.94778	-0.580022	0.5619	NA	RP11-757O6.7	NA	0.940998	2	0	0	0	0	0
17929	ENSG00000278447	0.378154	-2.2898	3.94778	-0.580022	0.5619	NA	MIR6781	102465468	0.940998	2	0	0	0	0	0
17930	ENSG00000278626	0.378154	-2.2898	3.94778	-0.580022	0.5619	NA	RP11-467L19.16	NA	0.940998	2	0	0	0	0	0
11317	ENSG00000100593	1.63055	-2.28396	1.7376	-1.31443	0.188702	NA	ISM2	145501	0.514532	1	5	2	1	1	0
11229	ENSG00000258477	1.61522	-2.27137	1.70717	-1.33049	0.183358	NA	PPIAP6	NA	0.503847	3	2	2	1	1	0
9575	ENSG00000182040	3.20221	-2.27067	1.37635	-1.64978	0.098988	0.187179	USH1G	124590	0.319015	11	1	3	2	0	1
3046	ENSG00000185527	18.0659	-2.27029	0.545255	-4.16371	3.13112e-05	0.000182481	PDE6G	5148	0.000317203	26	26	38	5	6	8
8896	ENSG00000236305	3.22382	-2.26971	1.25247	-1.81219	0.0699573	0.141509	RP11-126L15.4	NA	0.242664	7	4	6	2	2	0
11339	ENSG00000231156	1.6086	-2.26652	1.72987	-1.31022	0.19012	NA	AC093702.1	NA	0.517369	3	1	3	1	1	0
11390	ENSG00000242858	1.60756	-2.26582	1.74061	-1.30174	0.193005	NA	CTC-484M2.1	NA	0.522893	5	1	2	1	1	0
11590	ENSG00000232756	1.60651	-2.26543	1.77912	-1.27334	0.202897	NA	RP5-1185I7.1	NA	0.540163	6	1	1	1	1	0
5642	ENSG00000149925	263.585	-2.26517	0.799658	-2.83267	0.00461612	0.0145242	ALDOA	226	0.0252471	520	349	440	195	47	30
4185	ENSG00000256940	12.9377	-2.25952	0.643716	-3.51011	0.000447918	0.00189999	RP11-783K16.5	NA	0.00330272	22	14	29	6	3	4
11410	ENSG00000215284	1.61515	-2.25531	1.73811	-1.29756	0.194437	NA	RP11-198M15.1	NA	0.525725	2	1	5	1	0	1
8670	ENSG00000187186	3.26646	-2.25459	1.207	-1.86793	0.0617718	0.12785	RP11-195F19.5	730098	0.219856	5	7	5	1	1	2
11361	ENSG00000157445	1.6141	-2.25449	1.72766	-1.30494	0.191914	NA	CACNA2D3	55799	0.521265	3	1	3	1	0	1
3029	ENSG00000137033	18.6094	-2.25422	0.540407	-4.17133	3.02823e-05	0.000177475	IL33	90865	0.000308501	22	35	35	6	8	5
80	ENSG00000103227	205.907	-2.25376	0.237782	-9.47826	2.58565e-21	5.73756e-19	LMF1	64788	9.97351e-19	339	375	307	84	51	79
1177	ENSG00000133475	49.809	-2.25362	0.380377	-5.9247	3.12868e-09	4.71881e-08	GGT2	102724197	8.20263e-08	77	71	99	25	10	17
11981	ENSG00000232835	1.6534	-2.25327	1.85692	-1.21345	0.22496	NA	AC107057.1	NA	0.579375	0	6	2	0	1	1
3987	ENSG00000201428	23.9837	-2.2513	0.623138	-3.61285	0.000302847	0.00134842	RN7SKP71	NA	0.00234393	16	48	55	10	13	2
11836	ENSG00000228071	1.627	-2.25001	1.82017	-1.23615	0.216402	NA	RPL7P47	NA	0.564189	1	2	5	0	2	0
8476	ENSG00000160862	4.92057	-2.24646	1.16967	-1.9206	0.0547824	0.11576	AZGP1	563	0.199443	1	12	11	0	3	2
15	ENSG00000168528	1057.28	-2.24482	0.193481	-11.6023	4.01044e-31	4.74623e-28	SERINC2	347735	8.25028e-28	1773	1938	1527	448	302	354
89	ENSG00000180210	229.302	-2.23916	0.237893	-9.41247	4.84595e-21	9.66577e-19	F2	2147	1.68018e-18	329	405	402	75	104	61
12048	ENSG00000227462	1.63355	-2.23667	1.86017	-1.2024	0.22921	NA	RP11-108B14.4	NA	0.587066	0	2	6	0	1	1
1	ENSG00000102265	1723.46	-2.23308	0.144745	-15.4277	1.06544e-53	1.89137e-49	TIMP1	7076	3.28774e-49	2937	2931	2659	633	600	580
262	ENSG00000168350	443.705	-2.23244	0.270744	-8.24556	1.64387e-16	1.11382e-14	DEGS2	123099	1.93613e-14	593	794	808	211	92	164
11500	ENSG00000235663	1.62274	-2.23076	1.73443	-1.28616	0.198387	NA	SAPCD1-AS1	NA	0.532334	5	1	2	0	1	1
4445	ENSG00000227063	435.972	-2.22983	0.658725	-3.38506	0.000711618	0.00284199	RPL41P1	NA	0.00494018	708	534	915	279	127	54
4267	ENSG00000274012	497.569	-2.22845	0.641374	-3.47449	0.000511828	0.00212936	RN7SL2	378706	0.00370143	517	726	1217	194	265	66
3131	ENSG00000167136	39.55	-2.22777	0.542128	-4.1093	3.96855e-05	0.000225007	ENDOG	2021	0.000391126	51	66	79	30	6	5
6042	ENSG00000121797	7.207	-2.22663	0.832307	-2.67525	0.00746744	0.0219437	CCRL2	9034	0.0381381	16	9	10	2	3	3
828	ENSG00000148702	145.626	-2.2233	0.341327	-6.5137	7.33219e-11	1.57199e-09	HABP2	3026	2.73257e-09	160	353	206	32	55	67
11913	ENSG00000100312	1.638	-2.22326	1.81591	-1.22432	0.220831	NA	ACR	49	0.572015	1	2	5	0	0	2
634	ENSG00000187608	60.1595	-2.21971	0.319913	-6.93847	3.96358e-12	1.1098e-10	ISG15	9636	1.92915e-10	88	103	106	23	24	17
4473	ENSG00000279483	439.908	-2.21778	0.657856	-3.37122	0.000748368	0.00297005	AC090498.1	NA	0.00516279	712	543	917	283	129	55
2000	ENSG00000213280	41.317	-2.2171	0.445657	-4.97491	6.52786e-07	5.79413e-06	RP11-212P7.1	NA	1.00718e-05	77	50	78	25	12	7
3278	ENSG00000219747	27.1861	-2.21518	0.551871	-4.01395	5.97117e-05	0.000323369	RP1-292B18.1	NA	0.000562106	35	34	65	17	9	3
5886	ENSG00000188488	7.92257	-2.21082	0.808749	-2.73363	0.00626405	0.0188922	SERPINA5	5104	0.03284	14	11	15	2	5	2
1468	ENSG00000162366	99.3395	-2.2091	0.400404	-5.51717	3.44497e-08	4.16588e-07	PDZK1IP1	10158	7.24148e-07	219	124	147	27	62	17
8451	ENSG00000204941	3.93636	-2.2084	1.14598	-1.92709	0.0539682	0.114352	PSG5	5673	0.19706	11	2	6	2	1	2
10223	ENSG00000231848	2.31788	-2.20767	1.45878	-1.51337	0.130187	0.232292	AC012354.8	NA	0.392967	3	2	6	2	1	0
10184	ENSG00000230204	2.31683	-2.20691	1.45218	-1.51972	0.128581	0.230139	FTH1P5	NA	0.389599	5	2	5	2	1	0
10626	ENSG00000124785	2.36268	-2.20018	1.52963	-1.43837	0.15033	0.259748	NRN1	51299	0.436558	0	7	5	1	1	1
7687	ENSG00000267073	5.35165	-2.1946	1.02213	-2.14709	0.0317857	0.0737335	AC005256.1	NA	0.127586	7	7	13	4	2	0
6188	ENSG00000219451	7.00274	-2.19101	0.834472	-2.62563	0.00864894	0.0248159	AC005251.3	NA	0.0431301	10	9	15	3	2	3
4629	ENSG00000285873	11.6919	-2.19058	0.664991	-3.29415	0.000987195	0.00378585	NA	NA	0.00658087	14	18	26	5	3	4
529	ENSG00000134827	290.333	-2.18996	0.303985	-7.20418	5.83951e-13	1.9596e-11	TCN1	6947	3.40634e-11	315	639	475	63	126	124
6024	ENSG00000238041	7.69159	-2.18737	0.815254	-2.68306	0.00729525	0.0215018	RP11-59K5.1	NA	0.03737	16	11	11	5	2	2
10268	ENSG00000250846	2.35946	-2.18642	1.45465	-1.50305	0.132826	0.236017	EPHA5-AS1	100144602	0.399158	2	6	3	1	0	2
352	ENSG00000204257	339.06	-2.18489	0.277182	-7.88249	3.20919e-15	1.61845e-13	HLA-DMA	3108	2.81333e-13	355	621	691	90	126	151
4716	ENSG00000157884	19.7731	-2.18456	0.671235	-3.25454	0.00113574	0.00427486	CIB4	130106	0.00743092	15	41	41	5	2	15
7775	ENSG00000264940	6.78133	-2.18313	1.03094	-2.11762	0.0342076	0.0784837	SNORD3C	780853	0.135743	5	12	17	6	0	1
623	ENSG00000198832	124.349	-2.18281	0.313895	-6.95395	3.55205e-12	1.01213e-10	SELM	140606	1.75938e-10	210	182	220	63	49	23
54	ENSG00000123989	747.341	-2.17905	0.222081	-9.81196	1.00007e-22	3.28764e-20	CHPF	79586	5.71486e-20	1272	1205	1197	371	226	213
3888	ENSG00000224908	14.7646	-2.17781	0.59375	-3.66789	0.000244557	0.00111661	TIMM8BP2	NA	0.00194098	18	22	32	5	5	6
4869	ENSG00000156413	13.2389	-2.17715	0.685297	-3.17695	0.00148835	0.00542642	FUT6	2528	0.00943265	14	37	15	5	3	7
4948	ENSG00000214612	11.4618	-2.17655	0.694206	-3.13531	0.00171672	0.00615911	RPS19P1	NA	0.0107063	19	19	18	6	5	1
114	ENSG00000142669	605.021	-2.17165	0.238298	-9.11318	8.00049e-20	1.24009e-17	SH3BGRL3	83442	2.15564e-17	1266	872	833	274	222	163
915	ENSG00000242071	295.682	-2.16989	0.340428	-6.37399	1.84178e-10	3.57325e-09	RPL7AP6	NA	6.21133e-09	524	353	575	180	83	59
6143	ENSG00000270722	8.4241	-2.16751	0.821071	-2.63985	0.00829426	0.0239726	U1	NA	0.0416644	9	11	22	3	5	1
2705	ENSG00000278771	55.9178	-2.16673	0.492133	-4.40273	1.06898e-05	7.01538e-05	Metazoa_SRP	NA	0.000121947	79	67	128	18	37	5
8910	ENSG00000198848	4.44611	-2.16554	1.19861	-1.80671	0.0708083	0.143018	CES1	1066	0.24523	7	8	7	5	0	0
878	ENSG00000227097	276.635	-2.16479	0.336174	-6.4395	1.19871e-10	2.42363e-09	RPS28P7	NA	4.21295e-09	543	400	414	171	78	54
7198	ENSG00000139540	10.9645	-2.16416	0.949602	-2.27902	0.0226661	0.0560089	SLC39A5	283375	0.09717	1	38	15	2	2	8
2618	ENSG00000104883	22.3386	-2.16336	0.48482	-4.4622	8.11241e-06	5.50082e-05	PEX11G	92960	9.56198e-05	39	41	30	8	7	10
7190	ENSG00000168421	7.81202	-2.16158	0.947502	-2.28134	0.0225283	0.0557304	RHOH	399	0.0966866	5	19	15	0	6	3
229	ENSG00000125995	603.374	-2.15849	0.257933	-8.3684	5.84042e-17	4.52747e-15	ROMO1	140823	7.87003e-15	876	864	1218	314	160	188
9506	ENSG00000121742	3.81077	-2.15327	1.29103	-1.66787	0.0953412	0.181501	GJB6	10804	0.309493	0	13	6	2	2	1
5425	ENSG00000220924	9.95765	-2.13485	0.731171	-2.91977	0.0035029	0.0114624	OSTCP4	NA	0.0199249	14	22	13	2	4	5
8481	ENSG00000124939	3.78456	-2.13446	1.11164	-1.9201	0.0548453	0.115838	SCGB2A1	4246	0.199554	6	8	5	2	1	2
719	ENSG00000167799	164.486	-2.1344	0.316493	-6.74391	1.5418e-11	3.80669e-10	NUDT8	254552	6.61711e-10	223	277	303	97	48	38
1531	ENSG00000254827	44.1939	-2.13105	0.39088	-5.45194	4.9823e-08	5.77699e-07	SLC22A18AS	5003	1.0042e-06	58	92	66	23	13	13
552	ENSG00000104833	205.306	-2.13046	0.298141	-7.14582	8.94579e-13	2.87691e-11	TUBB4A	10382	5.00089e-11	404	321	278	113	68	47
4724	ENSG00000226287	11.2977	-2.13042	0.655353	-3.2508	0.0011508	0.00432452	TMEM191A	84222	0.00751725	22	17	17	5	3	4
1001	ENSG00000197766	314.392	-2.12744	0.342998	-6.2025	5.55739e-10	9.85563e-09	CFD	1675	1.71319e-08	320	522	694	167	59	126
3298	ENSG00000108602	7829.68	-2.12649	0.531185	-4.0033	6.24651e-05	0.000336228	ALDH3A1	218	0.00058446	20284	8669	9271	3385	3713	1655
6155	ENSG00000253570	7.57743	-2.12647	0.806983	-2.63509	0.00841157	0.0242643	RNF5P1	NA	0.0421713	10	15	11	2	4	3
8350	ENSG00000232671	4.45558	-2.12639	1.08961	-1.95152	0.0509958	0.10928	RP11-126K1.2	100507670	0.188458	8	5	9	3	0	2
392	ENSG00000099330	112.217	-2.12516	0.274628	-7.7383	1.00754e-14	4.56272e-13	OCEL1	79629	7.9313e-13	161	210	177	54	32	39
5359	ENSG00000254528	15.2611	-2.12346	0.720434	-2.94748	0.0032038	0.0106128	RP11-728F11.4	NA	0.018448	7	42	25	3	4	10
3315	ENSG00000159884	21.4721	-2.12042	0.531056	-3.99283	6.52897e-05	0.00034963	CCDC107	203260	0.000607755	27	38	40	13	8	4
5597	ENSG00000236058	10.3262	-2.11856	0.744255	-2.84656	0.00441947	0.0140172	RP11-215A21.2	NA	0.0243659	17	11	23	7	2	3
5447	ENSG00000236844	11.2762	-2.11749	0.727564	-2.91039	0.00360983	0.0117646	AC091633.2	NA	0.0204502	17	8	30	4	3	6
1003	ENSG00000205220	52.3535	-2.11524	0.341384	-6.19607	5.78904e-10	1.0246e-08	PSMB10	5699	1.78104e-08	84	72	99	18	24	17
8	ENSG00000108679	3142.79	-2.11342	0.165194	-12.7936	1.7814e-37	3.95294e-34	LGALS3BP	3959	6.87132e-34	5796	4668	4854	1280	1228	1031
725	ENSG00000236439	95.6176	-2.11183	0.314348	-6.71814	1.84062e-11	4.50686e-10	RP11-175B9.3	NA	7.8342e-10	164	107	194	38	26	43
8753	ENSG00000232385	3.77327	-2.11033	1.14258	-1.84699	0.0647484	0.132803	RPS3AP25	NA	0.228265	6	4	9	1	1	3
880	ENSG00000235957	65.3966	-2.11017	0.327995	-6.43354	1.2467e-10	2.51493e-09	COX7CP1	NA	4.37166e-09	99	97	123	31	16	27
726	ENSG00000115255	85.8979	-2.10921	0.314011	-6.71701	1.85491e-11	4.53558e-10	REEP6	92840	7.88412e-10	176	130	113	43	25	29
7541	ENSG00000228499	5.87058	-2.10651	0.964596	-2.18382	0.0289751	0.0684438	TMSB10P1	NA	0.118565	8	5	16	4	1	2
1757	ENSG00000173156	102.446	-2.10491	0.403653	-5.21465	1.84167e-07	1.86075e-06	RHOD	29984	3.23451e-06	262	126	111	60	36	20
752	ENSG00000214530	251.432	-2.10325	0.316419	-6.64703	2.99063e-11	7.05061e-10	STARD10	10809	1.2256e-09	461	423	341	143	95	47
116	ENSG00000187837	519.265	-2.09999	0.23056	-9.10819	8.37682e-20	1.28194e-17	HIST1H1C	3006	2.22838e-17	901	640	986	169	250	171
8016	ENSG00000188873	4.49781	-2.09942	1.02763	-2.04298	0.0410548	0.0914435	RPL10AP2	NA	0.158042	7	6	9	1	2	3
3629	ENSG00000272288	16.356	-2.09934	0.549112	-3.82316	0.000131753	0.000644497	RP11-140K17.3	101929243	0.00112032	23	28	29	6	6	7
13	ENSG00000126005	749.448	-2.09617	0.176133	-11.9011	1.16839e-32	1.59548e-29	MMP24-AS1	NA	2.77339e-29	1215	1154	1275	335	270	247
1183	ENSG00000146677	67.9526	-2.0911	0.353194	-5.92055	3.20876e-09	4.81505e-08	AC004453.8	NA	8.36991e-08	121	77	132	37	21	19
4639	ENSG00000073737	16.7516	-2.08754	0.634657	-3.28923	0.0010046	0.0038443	DHRS9	10170	0.00668248	47	21	14	10	5	4
1005	ENSG00000166289	73.031	-2.08636	0.337139	-6.18843	6.07667e-10	1.07336e-08	PLEKHF1	79156	1.86581e-08	121	91	143	34	32	17
12688	ENSG00000182759	1.42307	-2.0859	1.88722	-1.10528	0.269039	NA	MAFA	389692	0.654238	2	4	1	2	0	0
672	ENSG00000227081	129.228	-2.08295	0.304314	-6.84473	7.66215e-12	2.02408e-10	RP11-543P15.1	NA	3.51843e-10	219	133	275	53	39	56
338	ENSG00000182154	586.088	-2.08238	0.263059	-7.91603	2.45222e-15	1.28792e-13	MRPL41	64975	2.23877e-13	808	888	1150	326	162	183
72	ENSG00000105518	356.759	-2.08055	0.217521	-9.56483	1.12381e-21	2.77082e-19	TMEM205	374882	4.81647e-19	571	606	556	179	110	120
12735	ENSG00000273253	1.41541	-2.07872	1.88886	-1.10051	0.271109	NA	RP3-402G11.26	NA	0.65692	3	2	1	2	0	0
7	ENSG00000180879	2628.44	-2.0765	0.162276	-12.7961	1.72411e-37	3.95294e-34	SSR4	6748	6.87132e-34	4243	3911	4595	1137	1007	878
884	ENSG00000179085	184.951	-2.07622	0.323071	-6.42652	1.30557e-10	2.62015e-09	DPM3	54344	4.55456e-09	238	264	395	109	43	60
12904	ENSG00000250538	1.41088	-2.07573	1.92672	-1.07734	0.28133	NA	RP11-92A5.2	107986321	0.672758	1	1	5	2	0	0
12	ENSG00000101439	2535.73	-2.07478	0.171989	-12.0635	1.64665e-33	2.43595e-30	CST3	1471	4.23436e-30	4057	3861	4378	1157	935	826
14308	ENSG00000235371	1.39903	-2.07336	2.31382	-0.896075	0.370212	NA	RP4-764D2.1	NA	0.798049	7	0	0	2	0	0
12896	ENSG00000066336	1.44147	-2.06895	1.91751	-1.07898	0.280597	NA	SPI1	6688	0.671423	0	5	2	1	1	0
264	ENSG00000224051	220.699	-2.06849	0.250891	-8.24455	1.65781e-16	1.11475e-14	CPTP	80772	1.93775e-14	376	360	334	115	81	58
4421	ENSG00000243829	33.2584	-2.06821	0.608688	-3.39781	0.000679267	0.00272752	CTB-33G10.1	NA	0.00474119	58	25	79	27	8	4
9294	ENSG00000196415	3.58142	-2.06728	1.2033	-1.718	0.085796	0.166818	PRTN3	5657	0.28486	5	9	3	2	2	0
9417	ENSG00000259137	3.53759	-2.06548	1.22207	-1.69015	0.0909996	0.174764	RP11-305B6.1	NA	0.298177	6	4	8	3	1	0
10157	ENSG00000201098	2.83807	-2.06537	1.35529	-1.52393	0.127525	0.2288	RNY1	6084	0.387421	2	4	8	2	1	0
808	ENSG00000105427	82.8528	-2.06369	0.315067	-6.54999	5.75396e-11	1.26416e-09	CNFN	84518	2.19747e-09	112	152	137	45	24	27
11110	ENSG00000185883	2.1552	-2.06255	1.52618	-1.35144	0.176553	NA	ATP6V0C	527	0.490361	1	6	3	2	0	1
904	ENSG00000138207	421.276	-2.06202	0.3232	-6.38	1.77086e-10	3.47746e-09	RBP4	5950	6.04481e-09	345	819	875	131	133	225
13078	ENSG00000198846	1.45359	-2.06129	1.95591	-1.05388	0.291938	NA	TOX	9760	0.688786	0	6	1	1	0	1
13079	ENSG00000224791	1.45359	-2.06129	1.95591	-1.05388	0.291938	NA	KRT18P39	NA	0.688786	0	6	1	1	0	1
11675	ENSG00000180316	2.14963	-2.06112	1.63746	-1.25873	0.208127	NA	PNPLA1	285848	0.550098	0	5	6	2	0	1
4761	ENSG00000258314	17.3048	-2.0598	0.63763	-3.23039	0.0012362	0.00460931	CTD-2314B22.1	NA	0.00801229	23	19	42	6	12	2
10044	ENSG00000256393	2.84252	-2.05709	1.32938	-1.5474	0.121767	0.220917	RPL41P5	NA	0.374077	3	4	7	2	0	1
9990	ENSG00000237991	2.84148	-2.05629	1.3179	-1.56028	0.118693	0.216462	RPL35P1	NA	0.36663	5	4	6	2	0	1
64	ENSG00000054148	1085.81	-2.05517	0.212537	-9.66967	4.05676e-22	1.12524e-19	PHPT1	29085	1.95599e-19	1613	1653	1986	556	352	355
11156	ENSG00000249489	2.11904	-2.05254	1.52916	-1.34227	0.179508	NA	GAPDHP70	NA	0.496527	6	1	3	2	1	0
11075	ENSG00000226278	2.13116	-2.04722	1.50605	-1.35933	0.174043	NA	PSPHP1	NA	0.484931	6	2	2	2	0	1
12408	ENSG00000261513	1.43931	-2.0466	1.78761	-1.14488	0.252259	NA	RP11-432I5.8	NA	0.627353	1	4	2	1	0	1
304	ENSG00000101210	464.355	-2.04591	0.254982	-8.02372	1.02592e-15	5.99084e-14	EEF1A2	1917	1.04138e-13	857	805	582	220	207	116
12413	ENSG00000100665	1.43826	-2.04564	1.78779	-1.14423	0.252527	NA	SERPINA4	5267	0.627767	2	4	1	1	0	1
12932	ENSG00000228847	1.43721	-2.04523	1.90587	-1.07312	0.283217	NA	ATP5G2P4	NA	0.675764	3	4	0	1	0	1
195	ENSG00000007255	172.238	-2.04454	0.240442	-8.50327	1.84318e-17	1.67795e-15	TRAPPC6A	79090	2.91675e-15	301	234	298	83	60	58
12147	ENSG00000223714	2.12211	-2.04378	1.72782	-1.18287	0.236861	NA	RP5-1172N10.2	105373185	0.601479	1	0	9	2	0	1
11288	ENSG00000262074	2.13954	-2.04243	1.54837	-1.31908	0.187142	NA	SNORD3B-2	780852	0.51159	1	2	7	1	2	0
43	ENSG00000128311	767.286	-2.04172	0.202304	-10.0924	5.97108e-24	2.46508e-21	TST	7263	4.28501e-21	1393	1025	1287	365	283	251
1606	ENSG00000165171	51.1091	-2.04167	0.379186	-5.38434	7.2709e-08	8.03692e-07	WBSCR27	155368	1.39704e-06	100	67	80	30	14	15
5037	ENSG00000232070	12.208	-2.04149	0.658898	-3.09834	0.00194606	0.00685855	TMEM253	643382	0.0119221	12	25	22	6	3	6
10714	ENSG00000184497	2.15618	-2.03995	1.43137	-1.42517	0.154107	NA	TMEM255B	348013	0.443811	3	5	2	1	1	1
10715	ENSG00000244752	2.15618	-2.03995	1.43137	-1.42517	0.154107	NA	CRYBB2	1415	0.443811	3	5	2	1	1	1
7846	ENSG00000166126	5.02679	-2.03745	0.972066	-2.096	0.0360821	0.0820665	AMN	81693	0.141909	5	9	10	2	3	2
2431	ENSG00000185519	60.5658	-2.03732	0.443173	-4.59711	4.28388e-06	3.12823e-05	FAM131C	348487	5.43775e-05	130	103	59	37	26	9
10670	ENSG00000227077	2.14956	-2.03607	1.42188	-1.43196	0.152155	NA	AC107983.4	NA	0.440039	3	4	3	1	1	1
200	ENSG00000250479	1105.93	-2.03581	0.23984	-8.48822	2.0983e-17	1.86245e-15	CHCHD10	400916	3.23747e-15	2049	1557	1729	605	386	310
9009	ENSG00000134571	3.58644	-2.03339	1.14041	-1.78304	0.0745804	0.148976	MYBPC3	4607	0.255456	5	6	7	1	3	1
12471	ENSG00000253395	1.42398	-2.03276	1.79027	-1.13544	0.256189	NA	KB-1460A1.1	NA	0.63391	3	1	2	1	0	1
11175	ENSG00000278107	2.16377	-2.03224	1.51758	-1.33913	0.180527	NA	RP11-162A12.4	NA	0.498498	1	5	5	1	0	2
11887	ENSG00000110799	2.12106	-2.03081	1.65101	-1.23004	0.21868	NA	VWF	7450	0.567682	7	0	3	1	2	0
295	ENSG00000213442	2300.43	-2.03002	0.25164	-8.06715	7.19571e-16	4.33011e-14	RPL18AP3	NA	7.52696e-14	4217	3178	3694	1323	749	642
13211	ENSG00000205922	1.41945	-2.02815	1.96357	-1.03289	0.301657	NA	ONECUT3	390874	0.704571	1	0	6	1	0	1
11453	ENSG00000281383	2.15375	-2.02762	1.56785	-1.29325	0.195924	NA	CH507-513H4.5	NA	0.527881	3	4	3	0	3	0
10334	ENSG00000170369	2.84971	-2.02529	1.35687	-1.49261	0.135538	0.239445	CST2	1470	0.404706	2	1	10	1	2	1
389	ENSG00000230979	123.772	-2.02513	0.261264	-7.75126	9.09874e-15	4.15221e-13	AC079250.1	NA	7.21771e-13	211	164	221	60	43	42
11202	ENSG00000226986	2.16796	-2.02438	1.5169	-1.33455	0.182025	NA	RP11-543B16.2	NA	0.501377	1	5	5	0	2	1
11203	ENSG00000233452	2.16796	-2.02438	1.5169	-1.33455	0.182025	NA	STXBP5-AS1	NA	0.501377	1	5	5	0	2	1
12483	ENSG00000180172	1.449	-2.02283	1.78338	-1.13427	0.25668	NA	RPS12P23	NA	0.634514	1	4	2	0	1	1
12922	ENSG00000154646	1.42922	-2.02165	1.88106	-1.07474	0.282492	NA	TMPRSS15	5651	0.674596	2	1	3	0	2	0
12924	ENSG00000240086	1.42817	-2.02065	1.88128	-1.07408	0.282787	NA	RP11-657O9.1	NA	0.675143	3	1	2	0	2	0
12925	ENSG00000282851	1.42817	-2.02065	1.88128	-1.07408	0.282787	NA	BISPR	105221694	0.675143	3	1	2	0	2	0
404	ENSG00000167700	432.42	-2.01979	0.262983	-7.68029	1.58735e-14	6.97491e-13	MFSD3	113655	1.21244e-12	773	635	674	255	126	132
12412	ENSG00000206172	1.44133	-2.01641	1.7621	-1.14432	0.252491	NA	HBA1	3039	0.627729	2	2	2	0	1	1
3374	ENSG00000259803	23.8682	-2.01623	0.509785	-3.95505	7.65175e-05	0.00040259	SLC22A31	146429	0.000699815	47	33	35	11	14	4
11240	ENSG00000146666	2.17346	-2.01523	1.51606	-1.32925	0.183764	NA	LINC00525	84847	0.504502	1	5	5	0	1	2
9327	ENSG00000196972	3.61374	-2.0144	1.17747	-1.71079	0.0871205	0.168876	SMIM10L2B	NA	0.288235	5	7	6	0	2	3
13565	ENSG00000213409	1.4226	-2.01354	2.04482	-0.984706	0.324769	NA	C1QBPP2	NA	0.738755	2	0	5	0	2	0
11870	ENSG00000273437	2.1745	-2.01304	1.63361	-1.23226	0.21785	NA	RP11-434H6.7	NA	0.566332	0	5	6	0	1	2
2276	ENSG00000181524	36.3155	-2.01302	0.426602	-4.71872	2.37338e-06	1.85089e-05	RPL24P4	NA	3.21737e-05	53	52	70	21	15	7
418	ENSG00000197582	348.704	-2.00875	0.263531	-7.62245	2.48896e-14	1.05704e-12	GPX1P1	NA	1.83743e-12	616	457	603	201	112	104
5236	ENSG00000214708	11.9782	-2.00864	0.669067	-3.00216	0.00268072	0.00908864	AC090616.2	105371730	0.0157986	12	18	27	6	3	6
13257	ENSG00000157335	1.43681	-2.00809	1.95738	-1.02591	0.304934	NA	CLEC18C	283971	0.709723	0	1	6	0	1	1
3476	ENSG00000197273	21.7441	-2.00757	0.514144	-3.90469	9.4347e-05	0.000481832	GUCA2A	2980	0.00083756	50	30	25	10	10	6
12937	ENSG00000231799	1.45449	-2.00729	1.87339	-1.07148	0.283955	NA	RP13-93L13.2	NA	0.677303	1	4	2	0	0	2
4311	ENSG00000223803	22.6944	-2.00683	0.581614	-3.45046	0.000559641	0.00230451	RPS20P14	NA	0.0040059	39	33	38	17	8	2
2801	ENSG00000224114	34.6069	-2.00623	0.463276	-4.33052	1.48758e-05	9.4279e-05	RP11-343H5.4	NA	0.000163884	60	42	64	23	12	6
6838	ENSG00000109846	82.0973	-2.00242	0.836215	-2.39463	0.0166373	0.0432424	CRYAB	1410	0.0750795	45	159	189	12	26	60
30	ENSG00000107902	350.706	-1.99927	0.189395	-10.5561	4.76143e-26	2.81749e-23	LHPP	64077	4.8976e-23	497	580	607	153	125	142
943	ENSG00000130733	177.187	-1.99917	0.316753	-6.31145	2.7644e-10	5.20145e-09	YIPF2	78992	9.04159e-09	318	253	281	111	62	39
4229	ENSG00000170298	18.85	-1.99885	0.572588	-3.49091	0.000481374	0.00202065	LGALS9B	284194	0.00351247	49	19	23	8	9	5
4119	ENSG00000168993	18.0263	-1.99619	0.563036	-3.5454	0.000392014	0.00168949	CPLX1	10815	0.00293682	25	35	26	10	9	3
13154	ENSG00000253642	1.44125	-1.99353	1.91285	-1.04218	0.29733	NA	RP11-317N12.1	NA	0.697506	1	1	5	0	0	2
5091	ENSG00000166246	12.4377	-1.99159	0.648374	-3.07167	0.00212868	0.00742256	C16orf71	146562	0.0129025	23	15	22	8	3	4
1374	ENSG00000226532	68.9123	-1.99083	0.352313	-5.65073	1.59764e-08	2.06317e-07	RP5-1052M9.1	NA	3.58636e-07	104	72	154	32	22	29
13888	ENSG00000160181	1.4423	-1.98969	2.08186	-0.955723	0.339212	NA	TFF2	7032	0.753702	0	1	6	0	0	2
5621	ENSG00000226525	10.3317	-1.98839	0.700218	-2.83967	0.00451601	0.0142623	RPS7P10	NA	0.0247919	14	19	17	6	4	2
2127	ENSG00000181444	34.1996	-1.98494	0.408713	-4.85656	1.19441e-06	9.96858e-06	ZNF467	168544	1.73282e-05	47	60	57	13	9	19
133	ENSG00000149809	435.327	-1.98183	0.219695	-9.02084	1.86652e-19	2.49131e-17	TM7SF2	7108	4.33061e-17	845	629	610	210	180	138
1277	ENSG00000265962	215.758	-1.98151	0.343007	-5.77688	7.60998e-09	1.05789e-07	GACAT2	100287082	1.83891e-07	497	235	301	73	135	54
8729	ENSG00000186226	4.76692	-1.98082	1.06916	-1.85269	0.0639273	0.131484	LCE1E	353135	0.22599	11	4	8	3	3	0
319	ENSG00000125652	188.956	-1.98004	0.24831	-7.97406	1.53547e-15	8.54471e-14	ALKBH7	84266	1.48531e-13	311	299	295	104	67	58
707	ENSG00000171222	312.5	-1.97919	0.292257	-6.77211	1.26921e-11	3.18686e-10	SCAND1	51282	5.53966e-10	493	440	562	199	92	88
16	ENSG00000185201	1226.89	-1.97917	0.17084	-11.5849	4.91257e-31	5.4505e-28	IFITM2	10581	9.4745e-28	1898	2108	1866	585	445	459
490	ENSG00000099795	381.082	-1.97898	0.269285	-7.34901	1.99673e-13	7.23388e-12	NDUFB7	4713	1.25745e-11	594	548	682	231	108	123
781	ENSG00000198816	87.3533	-1.9776	0.299335	-6.60663	3.93164e-11	8.93656e-10	ZNF358	140467	1.55343e-09	143	148	128	48	25	33
13929	ENSG00000234695	1.43045	-1.97751	2.08516	-0.948373	0.34294	NA	AC002076.10	105375401	0.759741	6	0	1	0	0	2
5498	ENSG00000228887	18.1483	-1.97458	0.683026	-2.89093	0.00384101	0.0124019	EEF1DP1	NA	0.021558	41	15	31	16	4	2
127	ENSG00000173486	592.802	-1.97278	0.218131	-9.04403	1.50995e-19	2.1106e-17	FKBP2	2286	3.66883e-17	878	1005	953	319	183	219
727	ENSG00000233927	1988.64	-1.97249	0.293684	-6.71638	1.86289e-11	4.54411e-10	RPS28	6234	7.89895e-10	3668	2814	3028	1294	650	479
6761	ENSG00000138109	11.1352	-1.97238	0.814198	-2.42248	0.0154151	0.0405224	CYP2C9	1559	0.0703561	2	22	29	3	5	5
11357	ENSG00000213569	2.65916	-1.97185	1.51092	-1.30506	0.191871	0.313299	RP13-383K5.4	NA	0.521265	1	7	5	3	0	0
7154	ENSG00000264785	8.11772	-1.96732	0.858894	-2.29052	0.0219909	0.0546755	RP11-311F12.2	NA	0.0948556	23	6	10	6	3	1
9873	ENSG00000236762	3.34642	-1.96646	1.23847	-1.58781	0.112329	0.207146	RP11-159H3.1	NA	0.351071	7	4	6	3	1	0
18	ENSG00000108639	2297.08	-1.96304	0.172988	-11.3478	7.60171e-30	7.49697e-27	SYNGR2	9144	1.30319e-26	3606	3651	3712	1139	804	870
6968	ENSG00000257588	7.47317	-1.96299	0.833846	-2.35414	0.0185657	0.0473736	RP11-469H8.6	101927318	0.0822188	16	14	6	5	3	2
359	ENSG00000177700	2801.47	-1.96274	0.249866	-7.85518	3.99199e-15	1.97398e-13	POLR2L	5441	3.43133e-13	4371	4049	4958	1691	911	829
494	ENSG00000185499	127.823	-1.96262	0.267658	-7.33257	2.25774e-13	8.11325e-12	MUC1	4582	1.41031e-11	189	244	177	66	41	50
7887	ENSG00000257660	7.00597	-1.96229	0.940043	-2.08745	0.0368478	0.0833702	RP11-579D7.4	100506125	0.144168	12	11	10	2	0	7
5973	ENSG00000135744	14.5029	-1.96193	0.726555	-2.70031	0.00692745	0.0205921	AGT	183	0.0357889	5	24	41	5	6	7
16219	ENSG00000229028	0.732201	-1.96061	2.82504	-0.694012	0.487675	NA	KRT223P	NA	0.927842	0	4	0	0	1	0
16198	ENSG00000105143	0.737697	-1.96057	2.81823	-0.695675	0.486632	NA	SLC1A6	6511	0.926893	0	4	0	0	0	1
16199	ENSG00000187950	0.737697	-1.96057	2.81823	-0.695675	0.486632	NA	OVCH1	341350	0.926893	0	4	0	0	0	1
16200	ENSG00000199664	0.737697	-1.96057	2.81823	-0.695675	0.486632	NA	RNU6-1266P	NA	0.926893	0	4	0	0	0	1
6680	ENSG00000230513	7.4575	-1.9592	0.798947	-2.45223	0.0141973	0.0377677	THAP7-AS1	439931	0.0655821	11	11	14	5	3	2
134	ENSG00000110628	463.412	-1.95821	0.217239	-9.0141	1.98496e-19	2.62962e-17	SLC22A18	5002	4.57103e-17	638	781	793	244	152	173
68	ENSG00000174938	821.069	-1.95635	0.203113	-9.63186	5.86593e-22	1.53135e-19	SEZ6L2	26470	2.66192e-19	1519	1241	1158	414	324	272
3153	ENSG00000173267	23.8907	-1.95587	0.477209	-4.09856	4.1573e-05	0.000234064	SNCG	6623	0.00040687	27	37	50	11	9	9
85	ENSG00000122971	228.441	-1.95529	0.20696	-9.44765	3.46525e-21	7.23707e-19	ACADS	35	1.25801e-18	324	374	391	106	90	84
257	ENSG00000233276	2399.88	-1.95488	0.236747	-8.25725	1.49062e-16	1.02862e-14	GPX1	2876	1.78802e-14	4141	3051	4255	1323	937	692
81	ENSG00000167105	208.21	-1.95274	0.206166	-9.47169	2.75355e-21	6.03469e-19	TMEM92	162461	1.049e-18	301	361	331	78	89	89
1966	ENSG00000149435	34.7262	-1.95229	0.38995	-5.00653	5.54199e-07	5.00414e-06	GGTLC1	92086	8.69862e-06	53	50	63	17	13	13
991	ENSG00000125534	788.322	-1.95212	0.313885	-6.21923	4.99609e-10	8.9496e-09	PPDPF	79144	1.55569e-08	1384	1291	1084	547	227	197
9447	ENSG00000221826	4.09898	-1.9517	1.16059	-1.68165	0.0926362	0.17736	PSG3	5671	0.30259	9	6	5	1	4	0
8385	ENSG00000229798	4.81595	-1.95084	1.00387	-1.94332	0.051977	0.110915	KRT18P26	NA	0.191261	10	5	8	2	1	4
7248	ENSG00000274272	6.72635	-1.95	0.861904	-2.26243	0.0236708	0.0581115	RP11-44M6.7	NA	0.100777	10	7	15	5	2	2
9225	ENSG00000152128	4.13531	-1.94936	1.12511	-1.73259	0.0831679	0.162688	TMEM163	81615	0.2782	5	9	6	2	0	4
15642	ENSG00000223552	0.715892	-1.94651	2.57635	-0.755529	0.449932	NA	RP11-24F11.2	NA	0.887553	0	2	1	1	0	0
15643	ENSG00000235256	0.715892	-1.94651	2.57635	-0.755529	0.449932	NA	FKBP4P7	NA	0.887553	0	2	1	1	0	0
15610	ENSG00000181908	0.725582	-1.94647	2.56621	-0.758499	0.448152	NA	AP003774.4	100996455	0.885799	0	2	1	0	1	0
15611	ENSG00000198183	0.725582	-1.94647	2.56621	-0.758499	0.448152	NA	BPIFA1	51297	0.885799	0	2	1	0	1	0
15612	ENSG00000242882	0.725582	-1.94647	2.56621	-0.758499	0.448152	NA	RPL5P11	NA	0.885799	0	2	1	0	1	0
15589	ENSG00000213394	0.731078	-1.94645	2.56055	-0.760167	0.447155	NA	RPSAP46	NA	0.88496	0	2	1	0	0	1
15590	ENSG00000227040	0.731078	-1.94645	2.56055	-0.760167	0.447155	NA	RP11-533F5.2	NA	0.88496	0	2	1	0	0	1
15591	ENSG00000230777	0.731078	-1.94645	2.56055	-0.760167	0.447155	NA	RP11-318C24.1	NA	0.88496	0	2	1	0	0	1
15592	ENSG00000272502	0.731078	-1.94645	2.56055	-0.760167	0.447155	NA	RP11-713M15.2	NA	0.88496	0	2	1	0	0	1
8828	ENSG00000213757	4.1023	-1.94569	1.06423	-1.82825	0.0675113	0.137454	CTC-451P13.1	NA	0.235984	6	5	9	2	1	3
15649	ENSG00000171695	0.714846	-1.9445	2.57734	-0.754461	0.450572	NA	LKAAEAR1	198437	0.888249	1	2	0	1	0	0
15650	ENSG00000174015	0.714846	-1.9445	2.57734	-0.754461	0.450572	NA	SPERT	220082	0.888249	1	2	0	1	0	0
15651	ENSG00000222005	0.714846	-1.9445	2.57734	-0.754461	0.450572	NA	LINC01118	388948	0.888249	1	2	0	1	0	0
15652	ENSG00000224565	0.714846	-1.9445	2.57734	-0.754461	0.450572	NA	RP1-148H17.1	NA	0.888249	1	2	0	1	0	0
15653	ENSG00000250983	0.714846	-1.9445	2.57734	-0.754461	0.450572	NA	RP11-91K8.2	NA	0.888249	1	2	0	1	0	0
15619	ENSG00000135472	0.724535	-1.94446	2.56717	-0.757435	0.44879	NA	FAIM2	23017	0.886097	1	2	0	0	1	0
15620	ENSG00000167083	0.724535	-1.94446	2.56717	-0.757435	0.44879	NA	GNGT2	2793	0.886097	1	2	0	0	1	0
15621	ENSG00000188176	0.724535	-1.94446	2.56717	-0.757435	0.44879	NA	SMTNL2	342527	0.886097	1	2	0	0	1	0
15622	ENSG00000232260	0.724535	-1.94446	2.56717	-0.757435	0.44879	NA	BTF3L4P1	NA	0.886097	1	2	0	0	1	0
15623	ENSG00000234004	0.724535	-1.94446	2.56717	-0.757435	0.44879	NA	RP11-543B16.1	NA	0.886097	1	2	0	0	1	0
15624	ENSG00000235100	0.724535	-1.94446	2.56717	-0.757435	0.44879	NA	RP11-80H5.9	NA	0.886097	1	2	0	0	1	0
15625	ENSG00000257691	0.724535	-1.94446	2.56717	-0.757435	0.44879	NA	RP11-345J4.1	NA	0.886097	1	2	0	0	1	0
15626	ENSG00000261444	0.724535	-1.94446	2.56717	-0.757435	0.44879	NA	RP11-347C12.9	NA	0.886097	1	2	0	0	1	0
15627	ENSG00000262884	0.724535	-1.94446	2.56717	-0.757435	0.44879	NA	CTD-3060P21.1	101927911	0.886097	1	2	0	0	1	0
15599	ENSG00000248079	0.730032	-1.94445	2.5615	-0.759104	0.44779	NA	DPH6-AS1	100507466	0.885726	1	2	0	0	0	1
15600	ENSG00000255355	0.730032	-1.94445	2.5615	-0.759104	0.44779	NA	AP000640.2	NA	0.885726	1	2	0	0	0	1
409	ENSG00000244187	249.593	-1.93831	0.252821	-7.66673	1.76437e-14	7.65797e-13	TMEM141	85014	1.33117e-12	284	432	472	126	84	99
47	ENSG00000228474	935.843	-1.93716	0.193533	-10.0095	1.38496e-23	5.23101e-21	OST4	100128731	9.09297e-21	1476	1381	1596	483	366	313
207	ENSG00000174917	297.882	-1.93426	0.228355	-8.4704	2.44544e-17	2.09717e-15	C19orf70	125988	3.64548e-15	452	456	510	164	98	108
15724	ENSG00000139055	0.709274	-1.93388	2.58261	-0.74881	0.453972	NA	ERP27	121506	0.890626	0	1	2	1	0	0
15725	ENSG00000204904	0.709274	-1.93388	2.58261	-0.74881	0.453972	NA	LINC01545	724087	0.890626	0	1	2	1	0	0
15726	ENSG00000207217	0.709274	-1.93388	2.58261	-0.74881	0.453972	NA	SNORA42	NA	0.890626	0	1	2	1	0	0
15727	ENSG00000214049	0.709274	-1.93388	2.58261	-0.74881	0.453972	NA	UCA1	652995	0.890626	0	1	2	1	0	0
15728	ENSG00000232203	0.709274	-1.93388	2.58261	-0.74881	0.453972	NA	SLC25A6P2	NA	0.890626	0	1	2	1	0	0
15729	ENSG00000250138	0.709274	-1.93388	2.58261	-0.74881	0.453972	NA	RP11-848G14.5	NA	0.890626	0	1	2	1	0	0
15675	ENSG00000167077	0.718964	-1.93388	2.57232	-0.751801	0.452171	NA	MEI1	150365	0.889582	0	1	2	0	1	0
15676	ENSG00000213197	0.718964	-1.93388	2.57232	-0.751801	0.452171	NA	AC012066.1	NA	0.889582	0	1	2	0	1	0
15677	ENSG00000214313	0.718964	-1.93388	2.57232	-0.751801	0.452171	NA	AZGP1P1	646282	0.889582	0	1	2	0	1	0
15678	ENSG00000215606	0.718964	-1.93388	2.57232	-0.751801	0.452171	NA	KRT18P35	NA	0.889582	0	1	2	0	1	0
15679	ENSG00000230257	0.718964	-1.93388	2.57232	-0.751801	0.452171	NA	NFE4	NA	0.889582	0	1	2	0	1	0
15680	ENSG00000231967	0.718964	-1.93388	2.57232	-0.751801	0.452171	NA	RP11-12D24.6	NA	0.889582	0	1	2	0	1	0
15681	ENSG00000237232	0.718964	-1.93388	2.57232	-0.751801	0.452171	NA	ZNF295-AS1	150142	0.889582	0	1	2	0	1	0
15682	ENSG00000255394	0.718964	-1.93388	2.57232	-0.751801	0.452171	NA	C8orf49	606553	0.889582	0	1	2	0	1	0
15683	ENSG00000268062	0.718964	-1.93388	2.57232	-0.751801	0.452171	NA	TOP1P1	NA	0.889582	0	1	2	0	1	0
15684	ENSG00000285761	0.718964	-1.93388	2.57232	-0.751801	0.452171	NA	NA	NA	0.889582	0	1	2	0	1	0
15685	ENSG00000285859	0.718964	-1.93388	2.57232	-0.751801	0.452171	NA	NA	NA	0.889582	0	1	2	0	1	0
15660	ENSG00000125337	0.72446	-1.93387	2.56659	-0.75348	0.451161	NA	KIF25	3834	0.888646	0	1	2	0	0	1
15661	ENSG00000254352	0.72446	-1.93387	2.56659	-0.75348	0.451161	NA	RP11-578O24.2	NA	0.888646	0	1	2	0	0	1
15662	ENSG00000266171	0.72446	-1.93387	2.56659	-0.75348	0.451161	NA	RP11-769O8.1	NA	0.888646	0	1	2	0	0	1
15663	ENSG00000266853	0.72446	-1.93387	2.56659	-0.75348	0.451161	NA	ITM2BP1	NA	0.888646	0	1	2	0	0	1
15664	ENSG00000273154	0.72446	-1.93387	2.56659	-0.75348	0.451161	NA	RP4-583P15.15	NA	0.888646	0	1	2	0	0	1
10686	ENSG00000228834	2.6524	-1.93273	1.35153	-1.43003	0.152709	0.262709	RP11-249L21.4	NA	0.440979	3	4	6	2	0	1
15141	ENSG00000140945	0.708227	-1.93184	2.39648	-0.806115	0.420177	NA	CDH13	1012	0.855533	1	1	1	1	0	0
15142	ENSG00000213211	0.708227	-1.93184	2.39648	-0.806115	0.420177	NA	KRT18P64	NA	0.855533	1	1	1	1	0	0
15143	ENSG00000220702	0.708227	-1.93184	2.39648	-0.806115	0.420177	NA	RP1-32I10.10	NA	0.855533	1	1	1	1	0	0
15144	ENSG00000230613	0.708227	-1.93184	2.39648	-0.806115	0.420177	NA	HM13-AS1	NA	0.855533	1	1	1	1	0	0
15145	ENSG00000251396	0.708227	-1.93184	2.39648	-0.806115	0.420177	NA	LINC01301	NA	0.855533	1	1	1	1	0	0
15146	ENSG00000285922	0.708227	-1.93184	2.39648	-0.806115	0.420177	NA	NA	NA	0.855533	1	1	1	1	0	0
15089	ENSG00000177340	0.717917	-1.93184	2.38805	-0.808959	0.418539	NA	FLJ13224	79857	0.855444	1	1	1	0	1	0
15090	ENSG00000254333	0.717917	-1.93184	2.38805	-0.808959	0.418539	NA	CTC-367J11.1	102546298	0.855444	1	1	1	0	1	0
15091	ENSG00000276968	0.717917	-1.93184	2.38805	-0.808959	0.418539	NA	RP11-90M2.5	NA	0.855444	1	1	1	0	1	0
15066	ENSG00000124233	0.723413	-1.93184	2.38335	-0.810555	0.417621	NA	SEMG1	6406	0.854742	1	1	1	0	0	1
15067	ENSG00000175264	0.723413	-1.93184	2.38335	-0.810555	0.417621	NA	CHST1	8534	0.854742	1	1	1	0	0	1
15068	ENSG00000196549	0.723413	-1.93184	2.38335	-0.810555	0.417621	NA	MME	4311	0.854742	1	1	1	0	0	1
15069	ENSG00000229184	0.723413	-1.93184	2.38335	-0.810555	0.417621	NA	ATP5HP2	NA	0.854742	1	1	1	0	0	1
15070	ENSG00000231903	0.723413	-1.93184	2.38335	-0.810555	0.417621	NA	AC079354.5	NA	0.854742	1	1	1	0	0	1
15071	ENSG00000243550	0.723413	-1.93184	2.38335	-0.810555	0.417621	NA	LINC01214	NA	0.854742	1	1	1	0	0	1
15072	ENSG00000244146	0.723413	-1.93184	2.38335	-0.810555	0.417621	NA	RP11-366M4.2	NA	0.854742	1	1	1	0	0	1
15073	ENSG00000254607	0.723413	-1.93184	2.38335	-0.810555	0.417621	NA	RP11-115C10.1	101929427	0.854742	1	1	1	0	0	1
15074	ENSG00000259078	0.723413	-1.93184	2.38335	-0.810555	0.417621	NA	PTBP1P	NA	0.854742	1	1	1	0	0	1
15075	ENSG00000263307	0.723413	-1.93184	2.38335	-0.810555	0.417621	NA	RP11-166B2.8	NA	0.854742	1	1	1	0	0	1
15076	ENSG00000268201	0.723413	-1.93184	2.38335	-0.810555	0.417621	NA	CTD-3138B18.6	NA	0.854742	1	1	1	0	0	1
15077	ENSG00000277200	0.723413	-1.93184	2.38335	-0.810555	0.417621	NA	RP11-74E22.8	NA	0.854742	1	1	1	0	0	1
15690	ENSG00000221986	0.722366	-1.92984	2.56851	-0.751344	0.452446	NA	MYBPHL	343263	0.889612	2	1	0	0	0	1
15691	ENSG00000224525	0.722366	-1.92984	2.56851	-0.751344	0.452446	NA	RP11-561I11.3	NA	0.889612	2	1	0	0	0	1
15692	ENSG00000226334	0.722366	-1.92984	2.56851	-0.751344	0.452446	NA	RP11-217B7.2	NA	0.889612	2	1	0	0	0	1
15693	ENSG00000238085	0.722366	-1.92984	2.56851	-0.751344	0.452446	NA	RP11-435F13.2	NA	0.889612	2	1	0	0	0	1
15694	ENSG00000275070	0.722366	-1.92984	2.56851	-0.751344	0.452446	NA	Metazoa_SRP	NA	0.889612	2	1	0	0	0	1
15708	ENSG00000159186	0.71687	-1.92983	2.57428	-0.749661	0.453459	NA	AC007383.6	NA	0.890517	2	1	0	0	1	0
15709	ENSG00000171243	0.71687	-1.92983	2.57428	-0.749661	0.453459	NA	SOSTDC1	25928	0.890517	2	1	0	0	1	0
15710	ENSG00000196406	0.71687	-1.92983	2.57428	-0.749661	0.453459	NA	SPANXD	64648	0.890517	2	1	0	0	1	0
15711	ENSG00000255026	0.71687	-1.92983	2.57428	-0.749661	0.453459	NA	RP11-326C3.2	NA	0.890517	2	1	0	0	1	0
15712	ENSG00000270987	0.71687	-1.92983	2.57428	-0.749661	0.453459	NA	RP3-467N11.2	NA	0.890517	2	1	0	0	1	0
15744	ENSG00000167748	0.70718	-1.92983	2.58461	-0.746663	0.455267	NA	KLK1	3816	0.891976	2	1	0	1	0	0
15745	ENSG00000183273	0.70718	-1.92983	2.58461	-0.746663	0.455267	NA	CCDC60	160777	0.891976	2	1	0	1	0	0
15746	ENSG00000213772	0.70718	-1.92983	2.58461	-0.746663	0.455267	NA	EIF1P7	NA	0.891976	2	1	0	1	0	0
15747	ENSG00000236651	0.70718	-1.92983	2.58461	-0.746663	0.455267	NA	DLX2-AS1	104326193	0.891976	2	1	0	1	0	0
15748	ENSG00000258981	0.70718	-1.92983	2.58461	-0.746663	0.455267	NA	COX5AP2	NA	0.891976	2	1	0	1	0	0
15749	ENSG00000267533	0.70718	-1.92983	2.58461	-0.746663	0.455267	NA	RP11-815J4.7	NA	0.891976	2	1	0	1	0	0
15750	ENSG00000281849	0.70718	-1.92983	2.58461	-0.746663	0.455267	NA	RP13-465B17.4	NA	0.891976	2	1	0	1	0	0
1510	ENSG00000010438	53.5371	-1.92904	0.352754	-5.46851	4.53836e-08	5.33278e-07	PRSS3	5646	9.26988e-07	94	91	70	29	24	14
9723	ENSG00000230234	3.4195	-1.92801	1.19175	-1.6178	0.105706	0.19736	RP1-276N6.2	NA	0.335481	6	8	2	1	1	3
82	ENSG00000105372	19488.5	-1.92788	0.203666	-9.46587	2.91121e-21	6.30241e-19	RPS19	6223	1.09554e-18	33045	27574	31977	10601	7379	6355
312	ENSG00000105669	661.168	-1.9271	0.24136	-7.98434	1.41279e-15	8.03842e-14	COPE	11316	1.39731e-13	1056	989	1096	394	232	200
10993	ENSG00000167617	2.63707	-1.92592	1.40241	-1.37329	0.169661	0.284779	CDC42EP5	148170	0.476248	6	1	6	2	0	1
811	ENSG00000167363	86.8183	-1.925	0.293998	-6.54766	5.84449e-11	1.2793e-09	FN3K	64122	2.22379e-09	142	150	121	47	36	26
73	ENSG00000148346	405.765	-1.92409	0.201504	-9.54862	1.31435e-21	3.19621e-19	LCN2	3934	5.55591e-19	650	581	696	145	209	154
7911	ENSG00000176387	6.09789	-1.92327	0.925564	-2.07795	0.037714	0.0850698	HSD11B2	3291	0.147109	5	13	11	2	1	4
5428	ENSG00000274827	12.1	-1.92178	0.658552	-2.91819	0.00352068	0.0115126	LINC01297	NA	0.0200121	16	14	27	4	8	4
16350	ENSG00000175509	0.717842	-1.92057	2.84047	-0.676143	0.49895	NA	RP11-395L14.13	NA	0.934765	0	0	3	0	0	1
16351	ENSG00000235354	0.717842	-1.92057	2.84047	-0.676143	0.49895	NA	CTA-276O3.4	NA	0.934765	0	0	3	0	0	1
16352	ENSG00000249252	0.717842	-1.92057	2.84047	-0.676143	0.49895	NA	RP11-665G4.1	101929095	0.934765	0	0	3	0	0	1
16353	ENSG00000280369	0.717842	-1.92057	2.84047	-0.676143	0.49895	NA	CTD-2256P15.3	NA	0.934765	0	0	3	0	0	1
16368	ENSG00000177151	0.712345	-1.92055	2.84756	-0.674454	0.500022	NA	OR2T35	403244	0.934765	0	0	3	0	1	0
16369	ENSG00000206585	0.712345	-1.92055	2.84756	-0.674454	0.500022	NA	RNVU1-7	26864	0.934765	0	0	3	0	1	0
16370	ENSG00000233058	0.712345	-1.92055	2.84756	-0.674454	0.500022	NA	LINC00884	NA	0.934765	0	0	3	0	1	0
16397	ENSG00000173966	0.702656	-1.92053	2.86027	-0.67145	0.501934	NA	RP11-18M17.1	NA	0.934765	0	0	3	1	0	0
16398	ENSG00000260001	0.702656	-1.92053	2.86027	-0.67145	0.501934	NA	TGFBR3L	100507588	0.934765	0	0	3	1	0	0
16399	ENSG00000266899	0.702656	-1.92053	2.86027	-0.67145	0.501934	NA	AKR1B1P7	NA	0.934765	0	0	3	1	0	0
16400	ENSG00000271398	0.702656	-1.92053	2.86027	-0.67145	0.501934	NA	RP5-1092A3.5	NA	0.934765	0	0	3	1	0	0
16401	ENSG00000273368	0.702656	-1.92053	2.86027	-0.67145	0.501934	NA	RP11-376P6.3	NA	0.934765	0	0	3	1	0	0
6030	ENSG00000225969	9.91323	-1.92043	0.716584	-2.67998	0.0073627	0.021679	ABHD11-AS1	NA	0.037678	16	14	17	7	3	2
15761	ENSG00000165633	0.716795	-1.91917	2.5737	-0.745688	0.455856	NA	VSTM4	196740	0.892168	1	0	2	0	0	1
15762	ENSG00000185271	0.716795	-1.91917	2.5737	-0.745688	0.455856	NA	KLHL33	123103	0.892168	1	0	2	0	0	1
15763	ENSG00000186676	0.716795	-1.91917	2.5737	-0.745688	0.455856	NA	EEF1GP1	NA	0.892168	1	0	2	0	0	1
15764	ENSG00000227722	0.716795	-1.91917	2.5737	-0.745688	0.455856	NA	RP5-1059H15.1	NA	0.892168	1	0	2	0	0	1
15765	ENSG00000243384	0.716795	-1.91917	2.5737	-0.745688	0.455856	NA	RP11-475O23.2	NA	0.892168	1	0	2	0	0	1
15766	ENSG00000257551	0.716795	-1.91917	2.5737	-0.745688	0.455856	NA	HLX-AS1	100873924	0.892168	1	0	2	0	0	1
15767	ENSG00000264408	0.716795	-1.91917	2.5737	-0.745688	0.455856	NA	MIR4470	100616484	0.892168	1	0	2	0	0	1
15780	ENSG00000161180	0.711298	-1.91916	2.57953	-0.743995	0.45688	NA	CCDC116	164592	0.892812	1	0	2	0	1	0
15781	ENSG00000172746	0.711298	-1.91916	2.57953	-0.743995	0.45688	NA	RPL12P13	NA	0.892812	1	0	2	0	1	0
15782	ENSG00000196933	0.711298	-1.91916	2.57953	-0.743995	0.45688	NA	RPS26P11	NA	0.892812	1	0	2	0	1	0
15783	ENSG00000197870	0.711298	-1.91916	2.57953	-0.743995	0.45688	NA	PRB3	5544	0.892812	1	0	2	0	1	0
15784	ENSG00000213303	0.711298	-1.91916	2.57953	-0.743995	0.45688	NA	CTC-398G3.2	NA	0.892812	1	0	2	0	1	0
15785	ENSG00000214027	0.711298	-1.91916	2.57953	-0.743995	0.45688	NA	ARPC3P5	NA	0.892812	1	0	2	0	1	0
15786	ENSG00000232724	0.711298	-1.91916	2.57953	-0.743995	0.45688	NA	TRIM80P	NA	0.892812	1	0	2	0	1	0
15787	ENSG00000232829	0.711298	-1.91916	2.57953	-0.743995	0.45688	NA	GSTO3P	NA	0.892812	1	0	2	0	1	0
15788	ENSG00000260473	0.711298	-1.91916	2.57953	-0.743995	0.45688	NA	RP11-923I11.4	NA	0.892812	1	0	2	0	1	0
15789	ENSG00000265939	0.711298	-1.91916	2.57953	-0.743995	0.45688	NA	UBE2CP2	NA	0.892812	1	0	2	0	1	0
15790	ENSG00000269153	0.711298	-1.91916	2.57953	-0.743995	0.45688	NA	LYPLA2P2	NA	0.892812	1	0	2	0	1	0
15791	ENSG00000273980	0.711298	-1.91916	2.57953	-0.743995	0.45688	NA	RP13-49I15.6	NA	0.892812	1	0	2	0	1	0
15812	ENSG00000166682	0.701609	-1.91912	2.58998	-0.740979	0.458706	NA	TMPRSS5	80975	0.894907	1	0	2	1	0	0
15813	ENSG00000183246	0.701609	-1.91912	2.58998	-0.740979	0.458706	NA	RIMBP3C	150221	0.894907	1	0	2	1	0	0
15814	ENSG00000185105	0.701609	-1.91912	2.58998	-0.740979	0.458706	NA	MYADML2	255275	0.894907	1	0	2	1	0	0
15815	ENSG00000187066	0.701609	-1.91912	2.58998	-0.740979	0.458706	NA	TMEM262	100130348	0.894907	1	0	2	1	0	0
15816	ENSG00000213630	0.701609	-1.91912	2.58998	-0.740979	0.458706	NA	BOLA3P3	NA	0.894907	1	0	2	1	0	0
15817	ENSG00000278231	0.701609	-1.91912	2.58998	-0.740979	0.458706	NA	RP5-906C1.1	NA	0.894907	1	0	2	1	0	0
109	ENSG00000103363	1253.09	-1.91723	0.209506	-9.15119	5.63078e-20	9.17043e-18	TCEB2	6923	1.59408e-17	2090	1860	1995	701	433	440
15772	ENSG00000103522	0.715748	-1.91714	2.57468	-0.744614	0.456505	NA	IL21R	50615	0.892812	2	0	1	0	0	1
15773	ENSG00000185955	0.715748	-1.91714	2.57468	-0.744614	0.456505	NA	C7orf61	402573	0.892812	2	0	1	0	0	1
15774	ENSG00000264268	0.715748	-1.91714	2.57468	-0.744614	0.456505	NA	MIR4767	100616467	0.892812	2	0	1	0	0	1
15775	ENSG00000267246	0.715748	-1.91714	2.57468	-0.744614	0.456505	NA	RP11-798G7.7	NA	0.892812	2	0	1	0	0	1
15776	ENSG00000285714	0.715748	-1.91714	2.57468	-0.744614	0.456505	NA	NA	NA	0.892812	2	0	1	0	0	1
15793	ENSG00000124343	0.710252	-1.91712	2.58052	-0.742919	0.457531	NA	XG	100132596	0.893632	2	0	1	0	1	0
15794	ENSG00000154783	0.710252	-1.91712	2.58052	-0.742919	0.457531	NA	FGD5	152273	0.893632	2	0	1	0	1	0
15795	ENSG00000177669	0.710252	-1.91712	2.58052	-0.742919	0.457531	NA	MBOAT4	619373	0.893632	2	0	1	0	1	0
15796	ENSG00000226141	0.710252	-1.91712	2.58052	-0.742919	0.457531	NA	AF277315.13	NA	0.893632	2	0	1	0	1	0
15797	ENSG00000240674	0.710252	-1.91712	2.58052	-0.742919	0.457531	NA	RP11-366M4.1	NA	0.893632	2	0	1	0	1	0
15798	ENSG00000258988	0.710252	-1.91712	2.58052	-0.742919	0.457531	NA	RP11-125H8.1	NA	0.893632	2	0	1	0	1	0
15799	ENSG00000279414	0.710252	-1.91712	2.58052	-0.742919	0.457531	NA	bP-2171C21.4	NA	0.893632	2	0	1	0	1	0
15833	ENSG00000129538	0.700562	-1.91708	2.591	-0.7399	0.45936	NA	RNASE1	6035	0.895049	2	0	1	1	0	0
15834	ENSG00000223313	0.700562	-1.91708	2.591	-0.7399	0.45936	NA	RNU6-516P	NA	0.895049	2	0	1	1	0	0
15835	ENSG00000234199	0.700562	-1.91708	2.591	-0.7399	0.45936	NA	LINC01191	440900	0.895049	2	0	1	1	0	0
431	ENSG00000171159	253.81	-1.91632	0.253449	-7.56099	4.00007e-14	1.64754e-12	C9orf16	79095	2.8639e-12	368	427	410	151	81	87
5509	ENSG00000102931	16.3733	-1.91557	0.663412	-2.88745	0.00388376	0.0125149	ARL2BP	23568	0.0217544	37	13	27	13	3	4
2471	ENSG00000107159	30.6462	-1.91497	0.419521	-4.56467	5.00276e-06	3.59405e-05	CA9	768	6.24748e-05	40	58	48	16	12	11
83	ENSG00000167930	313.767	-1.91432	0.202424	-9.45696	3.17015e-21	6.78031e-19	FAM234A	83986	1.17861e-18	483	506	499	159	106	129
16402	ENSG00000234513	0.709205	-1.91408	2.85122	-0.671318	0.502018	NA	AC073072.7	NA	0.934765	3	0	0	0	1	0
16403	ENSG00000250241	0.709205	-1.91408	2.85122	-0.671318	0.502018	NA	RP11-9G1.3	101927359	0.934765	3	0	0	0	1	0
16404	ENSG00000253219	0.709205	-1.91408	2.85122	-0.671318	0.502018	NA	KRT18P41	NA	0.934765	3	0	0	0	1	0
16438	ENSG00000227653	0.699515	-1.91404	2.86401	-0.668306	0.503938	NA	ISCA1P6	NA	0.934765	3	0	0	1	0	0
16439	ENSG00000249846	0.699515	-1.91404	2.86401	-0.668306	0.503938	NA	RP11-77P16.4	NA	0.934765	3	0	0	1	0	0
69	ENSG00000170906	718.19	-1.91225	0.198663	-9.62556	6.2366e-22	1.60452e-19	NDUFA3	4696	2.78912e-19	1115	1203	1087	386	259	259
406	ENSG00000115268	2872.86	-1.91184	0.249189	-7.67226	1.68995e-14	7.38915e-13	RPS15	6209	1.28444e-12	4782	4126	4711	1790	945	884
7871	ENSG00000262165	6.03979	-1.91093	0.913687	-2.09145	0.0364875	0.0827206	RP11-81A22.5	NA	0.143043	16	5	8	2	3	3
129	ENSG00000198931	1122.4	-1.90992	0.211493	-9.03068	1.70605e-19	2.34773e-17	APRT	353	4.08102e-17	1988	1659	1673	620	424	371
12281	ENSG00000205794	1.92689	-1.90948	1.64401	-1.16148	0.245447	NA	RP11-333E13.4	344967	0.616726	5	2	2	2	0	0
1194	ENSG00000143369	62.2546	-1.90915	0.323463	-5.90224	3.5861e-09	5.33169e-08	ECM1	1893	9.26799e-08	92	111	92	35	23	20
957	ENSG00000105472	74.7806	-1.90809	0.303633	-6.28421	3.29525e-10	6.11257e-09	CLEC11A	6320	1.06254e-08	109	113	132	41	29	24
11465	ENSG00000240036	2.63595	-1.90651	1.47646	-1.29127	0.19661	0.319003	RP11-587D21.1	NA	0.529174	10	0	2	2	1	1
676	ENSG00000230076	107.925	-1.90639	0.279009	-6.83273	8.33108e-12	2.18777e-10	RPL10P6	NA	3.80296e-10	166	139	206	57	39	40
6718	ENSG00000261342	8.07258	-1.9062	0.780956	-2.44086	0.0146524	0.038764	AC006538.1	NA	0.0673026	9	18	11	2	3	5
10425	ENSG00000228903	2.68946	-1.90608	1.2925	-1.47472	0.140288	0.245891	RASA4CP	NA	0.415251	5	6	2	1	1	2
11074	ENSG00000274376	2.65095	-1.90565	1.40167	-1.35956	0.17397	0.290173	ADAMTS7P1	NA	0.484772	6	1	6	1	3	0
12022	ENSG00000267277	1.95853	-1.90455	1.57846	-1.20659	0.22759	NA	CTD-2342J14.6	NA	0.584176	2	6	1	2	1	0
2	ENSG00000143819	4136.98	-1.9045	0.139913	-13.612	3.39785e-42	3.01593e-38	EPHX1	2052	5.24254e-38	6665	6816	6109	1808	1784	1640
13148	ENSG00000239344	1.91261	-1.90448	1.82517	-1.04345	0.29674	NA	RP11-771F20.1	NA	0.696395	6	0	3	2	0	0
1687	ENSG00000248487	45.7242	-1.90299	0.35904	-5.30023	1.15654e-07	1.217e-06	ABHD14A	25864	2.1155e-06	58	72	87	23	16	19
3458	ENSG00000239246	27.6085	-1.90264	0.486197	-3.91331	9.10407e-05	0.000467285	RP11-464D20.2	NA	0.000812273	43	31	57	16	14	5
48	ENSG00000130313	382.801	-1.90086	0.19002	-10.0035	1.47144e-23	5.44188e-21	PGLS	25796	9.45953e-21	624	628	560	191	145	149
775	ENSG00000225200	98.044	-1.90039	0.287424	-6.61179	3.7969e-11	8.69711e-10	AB019441.29	NA	1.5118e-09	146	118	200	45	39	40
4240	ENSG00000218175	31.2123	-1.89858	0.544433	-3.48726	0.000487996	0.00204314	AC016739.2	NA	0.00355156	45	28	74	25	6	9
9490	ENSG00000134551	3.89721	-1.89839	1.13571	-1.67156	0.0946121	0.180384	PRH2	5555	0.307644	5	8	6	3	2	0
1228	ENSG00000012779	74.9361	-1.89607	0.324109	-5.8501	4.91289e-09	7.10209e-08	ALOX5	240	1.23454e-07	116	109	130	25	47	23
235	ENSG00000105640	6099.56	-1.8942	0.227597	-8.32262	8.60385e-17	6.49939e-15	RPL18A	6142	1.12978e-14	10781	8537	9522	3576	2272	1909
1561	ENSG00000126709	69.1331	-1.89108	0.348428	-5.42746	5.71623e-08	6.50061e-07	IFI6	2537	1.12999e-06	65	130	132	33	29	26
1994	ENSG00000215089	79.6994	-1.89095	0.379488	-4.98291	6.26365e-07	5.57634e-06	KRT18P11	NA	9.69326e-06	141	68	168	48	26	27
11845	ENSG00000268423	1.93763	-1.88874	1.52934	-1.235	0.216829	NA	AC011551.3	NA	0.564871	3	2	3	2	1	0
32	ENSG00000164405	1996.42	-1.88596	0.179629	-10.4992	8.71387e-26	4.83402e-23	UQCRQ	27089	8.4029e-23	2644	2930	3853	872	823	856
2480	ENSG00000184489	44.2263	-1.88541	0.413523	-4.55938	5.13057e-06	3.67249e-05	PTP4A3	11156	6.38383e-05	78	55	75	30	10	16
12028	ENSG00000232065	1.93101	-1.885	1.5633	-1.20578	0.227902	NA	LINC01063	101929769	0.584654	3	1	5	2	1	0
12631	ENSG00000278973	1.9223	-1.88109	1.68831	-1.11418	0.2652	NA	RP11-83B20.9	NA	0.647894	6	0	3	2	1	0
970	ENSG00000165644	218.766	-1.88019	0.300378	-6.25942	3.86411e-10	7.07172e-09	COMTD1	118881	1.22926e-08	315	297	420	144	66	70
8404	ENSG00000241352	5.83541	-1.88007	0.969841	-1.93854	0.052558	0.111912	RP11-392P7.1	NA	0.192984	7	7	14	3	4	0
6	ENSG00000176153	13370.9	-1.87938	0.142818	-13.1593	1.50559e-39	4.45454e-36	GPX2	2877	7.74325e-36	21785	21235	20060	5388	6321	5436
4989	ENSG00000163220	27.0377	-1.87935	0.602688	-3.11827	0.00181916	0.006473	S100A9	6280	0.0112519	16	64	48	13	3	19
1406	ENSG00000179588	94.4368	-1.87922	0.335445	-5.60217	2.11685e-08	2.67271e-07	ZFPM1	161882	4.64593e-07	174	126	146	62	35	24
11780	ENSG00000279464	2.71991	-1.87768	1.50802	-1.24513	0.213085	0.339589	RP11-17P16.1	NA	0.558181	1	7	5	0	0	4
11294	ENSG00000257126	2.67477	-1.87766	1.42511	-1.31756	0.187652	0.307931	FOXG1-AS1	NA	0.512712	2	1	9	0	2	2
11899	ENSG00000272277	1.95394	-1.87633	1.52699	-1.22877	0.219156	NA	RP1-40E16.12	NA	0.568344	3	4	2	1	2	0
651	ENSG00000111678	277.637	-1.87628	0.271514	-6.91044	4.83166e-12	1.31754e-10	C12orf57	113246	2.29025e-10	311	457	542	158	88	111
49	ENSG00000120725	414.394	-1.87545	0.189404	-9.90181	4.0879e-23	1.48099e-20	SIL1	64374	2.57438e-20	739	597	618	197	181	154
9195	ENSG00000280351	3.93315	-1.87209	1.07648	-1.73909	0.0820197	0.160868	CTD-2561B21.8	100129503	0.275254	6	9	3	2	2	2
9004	ENSG00000230337	4.66375	-1.87201	1.04963	-1.7835	0.0745057	0.148896	RP4-635E18.6	105376736	0.255317	6	8	8	0	3	3
1720	ENSG00000162552	70.2007	-1.87174	0.355673	-5.26255	1.42074e-07	1.46633e-06	WNT4	54361	2.54891e-06	73	111	147	29	21	40
3726	ENSG00000250221	66.6415	-1.87115	0.496356	-3.76977	0.000163395	0.000778475	KRT8P32	NA	0.00135321	116	72	127	59	17	10
11746	ENSG00000272088	1.96153	-1.86867	1.49648	-1.24871	0.21177	NA	RP11-168F9.2	NA	0.556274	1	4	5	1	1	1
123	ENSG00000140264	1580.29	-1.86861	0.206145	-9.06453	1.25147e-19	1.7921e-17	SERF2	10169	3.11517e-17	2035	2382	3026	818	561	658
500	ENSG00000236552	286.066	-1.86835	0.255763	-7.30504	2.77194e-13	9.8415e-12	RPL13AP5	728658	1.71073e-11	462	327	559	156	114	98
79	ENSG00000100577	348.026	-1.86535	0.196711	-9.4827	2.47797e-21	5.56823e-19	GSTZ1	2954	9.67915e-19	611	486	541	149	171	129
13029	ENSG00000236876	1.93618	-1.86486	1.75847	-1.0605	0.288917	NA	TMSB4XP1	NA	0.684273	1	0	8	1	2	0
6373	ENSG00000178715	9.03531	-1.86221	0.726806	-2.56218	0.0104017	0.0290013	RP11-169K16.8	NA	0.0503651	14	13	16	5	5	2
984	ENSG00000170430	90.8592	-1.8619	0.298658	-6.23422	4.54028e-10	8.19096e-09	MGMT	4255	1.42382e-08	152	129	147	51	42	25
12095	ENSG00000160808	1.96702	-1.85925	1.55819	-1.19321	0.232787	NA	MYL3	4634	0.593861	1	4	5	1	0	2
12096	ENSG00000236090	1.96702	-1.85925	1.55819	-1.19321	0.232787	NA	LDHAP3	NA	0.593861	1	4	5	1	0	2
5043	ENSG00000202058	20.1395	-1.85736	0.600174	-3.09471	0.00197005	0.00693483	RN7SKP80	NA	0.0120547	19	38	38	6	17	4
737	ENSG00000234648	689.658	-1.85722	0.277377	-6.69567	2.14688e-11	5.17115e-10	AL162151.3	NA	8.98893e-10	1331	940	973	448	248	198
386	ENSG00000136840	206.973	-1.85543	0.239049	-7.76172	8.37856e-15	3.85327e-13	ST6GALNAC4	27090	6.69807e-13	321	334	318	120	70	79
520	ENSG00000169627	676.845	-1.85198	0.255806	-7.23977	4.49443e-13	1.53433e-11	BOLA2B	107984053	2.6671e-11	1051	928	1202	431	231	219
570	ENSG00000124664	449.632	-1.85159	0.260054	-7.12	1.07929e-12	3.36134e-11	SPDEF	25803	5.84296e-11	565	878	670	263	133	189
10385	ENSG00000235169	3.18995	-1.85141	1.24818	-1.48329	0.137998	0.242645	SMIM1	388588	0.410047	1	6	8	2	1	1
11966	ENSG00000167850	1.97017	-1.85102	1.52424	-1.21439	0.2246	NA	CD300C	10871	0.579158	2	4	3	0	2	1
1336	ENSG00000174567	75.3409	-1.85076	0.325245	-5.69035	1.26778e-08	1.68455e-07	GOLT1A	127845	2.92823e-07	121	135	98	33	44	20
6627	ENSG00000180745	14.3823	-1.84519	0.747582	-2.46821	0.013579	0.0364074	CLRN3	119467	0.0632291	5	39	24	4	4	11
14680	ENSG00000240418	1.24061	-1.84413	2.16808	-0.85058	0.395003	NA	CTD-2013N17.1	NA	0.830313	1	5	0	2	0	0
426	ENSG00000214063	1101.63	-1.8441	0.24312	-7.58516	3.32078e-14	1.38381e-12	TSPAN4	7106	2.40546e-12	1731	1693	1746	702	372	365
4574	ENSG00000234851	19.0415	-1.84357	0.555097	-3.32117	0.000896423	0.00347908	RPL23AP42	NA	0.00604762	36	21	32	13	9	4
199	ENSG00000063241	656.284	-1.84319	0.217052	-8.49191	2.03274e-17	1.81333e-15	ISOC2	79763	3.15207e-15	906	1031	1143	378	243	237
1035	ENSG00000171443	153.507	-1.84246	0.299877	-6.14406	8.04361e-10	1.37962e-08	ZNF524	147807	2.39816e-08	263	204	253	102	54	45
504	ENSG00000243279	112.572	-1.84232	0.252523	-7.29562	2.97279e-13	1.04708e-11	PRAF2	11230	1.82012e-11	171	198	159	52	41	54
2187	ENSG00000181649	216.422	-1.84168	0.383069	-4.80771	1.52668e-06	1.23921e-05	PHLDA2	7262	2.1541e-05	452	290	274	158	88	37
234	ENSG00000135617	247.662	-1.84148	0.220913	-8.33578	7.69875e-17	5.84052e-15	PRADC1	84279	1.01525e-14	321	412	429	123	88	113
248	ENSG00000226976	1841.87	-1.84002	0.222331	-8.27601	1.27368e-16	9.1171e-15	COX6A1P2	NA	1.58481e-14	2117	2676	3845	874	703	836
318	ENSG00000105388	662.258	-1.8394	0.230654	-7.97472	1.5273e-15	8.52598e-14	CEACAM5	1048	1.48206e-13	1317	1079	710	280	267	320
10438	ENSG00000257252	3.17463	-1.83785	1.24748	-1.47324	0.140685	0.246344	RP11-486A14.2	NA	0.415909	8	4	3	2	3	0
12032	ENSG00000278344	1.968	-1.83668	1.52393	-1.20522	0.228117	NA	RP11-18C24.8	NA	0.58501	3	2	3	0	1	2
376	ENSG00000183617	253.162	-1.83485	0.235463	-7.79254	6.56748e-15	3.10069e-13	MRPL54	116541	5.38987e-13	338	373	476	139	104	89
7184	ENSG00000172955	113.725	-1.83477	0.803891	-2.28237	0.0224677	0.055627	ADH6	130	0.0965071	53	284	195	27	36	87
1279	ENSG00000214274	152.09	-1.83477	0.317706	-5.77506	7.69245e-09	1.06759e-07	ANG	283	1.85577e-07	136	321	256	69	51	80
798	ENSG00000160932	1369.38	-1.83435	0.279322	-6.56715	5.12865e-11	1.14032e-09	LY6E	4061	1.98219e-09	2750	1965	1702	890	515	395
226	ENSG00000197903	257.198	-1.83399	0.218916	-8.37762	5.40084e-17	4.24229e-15	HIST1H2BK	85236	7.3743e-15	476	336	392	122	121	95
14600	ENSG00000226386	1.23295	-1.83389	2.13096	-0.860595	0.389461	NA	PARD3-AS1	NA	0.82315	2	4	0	2	0	0
2213	ENSG00000133321	55.982	-1.83343	0.383747	-4.77772	1.77297e-06	1.42222e-05	RARRES3	5920	2.47222e-05	129	55	78	30	23	20
9	ENSG00000135404	4462.79	-1.83198	0.144013	-12.7209	4.52721e-37	8.92966e-34	CD63	967	1.55223e-33	6405	7227	7273	2099	1917	1855
206	ENSG00000110717	1069.85	-1.83195	0.216224	-8.4725	2.40192e-17	2.06985e-15	NDUFS8	102465669	3.59798e-15	1585	1709	1718	638	389	380
6057	ENSG00000225255	12.8094	-1.83154	0.685919	-2.67019	0.00758081	0.0222217	LINC01297	106146148	0.0386212	7	21	32	6	5	6
4476	ENSG00000214417	19.6126	-1.83085	0.543183	-3.37059	0.00075006	0.00297477	KRT18P13	NA	0.00517099	23	25	44	13	7	6
38	ENSG00000141349	766.02	-1.82899	0.17878	-10.2304	1.44947e-24	6.7713e-22	G6PC3	92579	1.17704e-21	1285	1206	1095	386	282	342
12284	ENSG00000231006	1.95929	-1.82898	1.57555	-1.16086	0.245701	NA	RPL7P32	NA	0.617178	6	1	2	0	1	2
111	ENSG00000237289	684.112	-1.82889	0.20021	-9.13486	6.54927e-20	1.04741e-17	CKMT1B	1159	1.8207e-17	911	1156	1136	284	249	369
10255	ENSG00000187017	3.18457	-1.82564	1.21283	-1.50528	0.132253	0.235253	ESPN	83715	0.397932	9	4	2	2	1	2
57	ENSG00000196154	2207.15	-1.82501	0.186529	-9.78407	1.318e-22	4.10477e-20	S100A4	6275	7.13525e-20	4187	2785	3356	1018	1021	876
14646	ENSG00000242841	1.22528	-1.82494	2.13374	-0.855278	0.392397	NA	KRT8P35	NA	0.826741	3	2	0	2	0	0
1292	ENSG00000262814	180.861	-1.82365	0.316869	-5.75521	8.65347e-09	1.18898e-07	MRPL12	6182	2.06679e-07	292	292	264	130	58	50
9994	ENSG00000175773	3.21273	-1.82345	1.16917	-1.55962	0.118851	0.216683	RP11-121M22.1	NA	0.36697	3	6	6	1	2	2
14077	ENSG00000213234	1.22738	-1.82218	1.97107	-0.924462	0.355246	NA	ST13P10	NA	0.778619	1	2	2	2	0	0
14078	ENSG00000213239	1.22738	-1.82218	1.97107	-0.924462	0.355246	NA	NPM1P32	NA	0.778619	1	2	2	2	0	0
14079	ENSG00000219274	1.22738	-1.82218	1.97107	-0.924462	0.355246	NA	RPS20P2	NA	0.778619	1	2	2	2	0	0
14085	ENSG00000224856	1.22633	-1.82102	1.97138	-0.923728	0.355628	NA	RP4-796I17.5	NA	0.779125	2	2	1	2	0	0
341	ENSG00000171858	3167.5	-1.82024	0.230111	-7.91027	2.56825e-15	1.33699e-13	RPS21	6227	2.32407e-13	4691	4096	6024	1860	1284	1049
10032	ENSG00000253882	3.20297	-1.81937	1.17346	-1.55044	0.121036	0.219832	RP11-61L23.2	154761	0.372303	7	5	3	1	2	2
1333	ENSG00000136149	151.856	-1.81813	0.318957	-5.70023	1.19644e-08	1.59334e-07	RPL13AP25	NA	2.76968e-07	262	151	297	74	42	86
806	ENSG00000158825	103.57	-1.81778	0.277501	-6.55054	5.7331e-11	1.26174e-09	CDA	978	2.19326e-09	167	183	135	58	36	43
2564	ENSG00000105649	32.2868	-1.81774	0.404026	-4.49906	6.82549e-06	4.72566e-05	RAB3A	5864	8.21454e-05	43	53	55	15	17	11
549	ENSG00000126106	101.207	-1.81723	0.254139	-7.15051	8.6456e-13	2.79557e-11	TMEM53	79639	4.85949e-11	149	153	171	51	43	40
28	ENSG00000109072	3017.55	-1.81721	0.171647	-10.5869	3.42587e-26	2.172e-23	VTN	7448	3.77555e-23	5014	4011	5077	1302	1181	1519
8127	ENSG00000137880	5.6553	-1.81551	0.902313	-2.01207	0.0442129	0.0971973	GCHFR	2644	0.167875	9	8	9	3	3	1
6950	ENSG00000269388	9.33728	-1.8149	0.769167	-2.35957	0.0182961	0.0468007	AC018755.16	NA	0.0812242	10	13	21	8	2	3
14117	ENSG00000074317	1.21971	-1.8137	1.97332	-0.919111	0.358038	NA	SNCB	6620	0.78257	2	1	2	2	0	0
14118	ENSG00000171540	1.21971	-1.8137	1.97332	-0.919111	0.358038	NA	OTP	23440	0.78257	2	1	2	2	0	0
14177	ENSG00000258011	1.21866	-1.81334	1.99969	-0.906808	0.364508	NA	HMGA1P3	NA	0.793372	3	1	1	2	0	0
1859	ENSG00000236152	52.8581	-1.81274	0.354662	-5.11118	3.20158e-07	3.05726e-06	MRPS36P1	NA	5.31438e-06	62	98	87	31	18	21
120	ENSG00000110011	197.792	-1.81118	0.199436	-9.08153	1.07056e-19	1.58371e-17	DNAJC4	3338	2.75294e-17	306	312	306	93	83	88
10108	ENSG00000007306	194.314	-1.81115	1.18052	-1.5342	0.12498	0.225335	CEACAM7	1087	0.381543	75	362	470	18	31	210
14713	ENSG00000177350	1.21205	-1.8094	2.13864	-0.846055	0.397522	NA	RPL13AP3	645683	0.833734	3	0	2	2	0	0
5922	ENSG00000225573	13.0189	-1.80925	0.66546	-2.7188	0.00655192	0.0196436	RPL35P5	NA	0.0341404	18	17	26	10	5	2
326	ENSG00000131495	412.534	-1.80915	0.227509	-7.95197	1.83571e-15	9.9962e-14	NDUFA2	4695	1.73762e-13	532	534	860	194	178	177
14825	ENSG00000128271	1.211	-1.80907	2.17906	-0.830208	0.406421	NA	ADORA2A	135	0.84596	5	0	1	2	0	0
917	ENSG00000184844	94.8461	-1.80846	0.283827	-6.37169	1.86954e-10	3.6192e-09	CYCSP45	NA	6.29119e-09	134	132	177	53	34	39
502	ENSG00000099785	169.695	-1.80769	0.247592	-7.30108	2.85458e-13	1.00945e-11	2002-03-01	51257	1.75471e-11	285	236	271	97	73	56
140	ENSG00000142089	393.639	-1.80763	0.202006	-8.94838	3.60728e-19	4.57403e-17	IFITM3	10410	7.95097e-17	666	645	527	209	167	149
5821	ENSG00000225431	12.8147	-1.80721	0.654002	-2.76331	0.00572185	0.0174496	AP001626.1	101928233	0.0303324	24	14	22	2	5	10
6485	ENSG00000170476	13.331	-1.80697	0.716984	-2.52023	0.0117277	0.032133	MZB1	51237	0.0558046	12	19	31	6	1	11
242	ENSG00000065054	369.708	-1.80692	0.21759	-8.30422	1.00477e-16	7.37051e-15	SLC9A3R2	9351	1.2812e-14	568	596	561	216	146	131
103	ENSG00000223572	710.564	-1.8067	0.19667	-9.18646	4.05983e-20	6.99709e-18	CKMT1A	548596	1.21629e-17	942	1218	1156	301	265	382
4406	ENSG00000125775	65.3507	-1.8064	0.530758	-3.40344	0.000665437	0.00268108	SDCBP2	27111	0.00466047	171	79	55	49	31	7
34	ENSG00000126267	4878.81	-1.80498	0.174324	-10.3541	4.00759e-25	2.09243e-22	COX6B1	1340	3.63724e-22	6490	7738	8532	2473	1877	2162
7181	ENSG00000231119	7.65708	-1.80428	0.790265	-2.28313	0.0224229	0.0555391	RP4-569M23.2	101927377	0.0963544	15	11	10	2	3	5
290	ENSG00000271447	357.399	-1.80295	0.222377	-8.10761	5.16247e-16	3.16014e-14	MMP28	79148	5.49322e-14	505	522	640	160	120	198
562	ENSG00000233762	163.604	-1.80221	0.25256	-7.13577	9.62437e-13	3.04007e-11	AC007969.5	NA	5.2845e-11	284	218	261	93	72	54
462	ENSG00000108107	7462.79	-1.80196	0.241542	-7.46022	8.63756e-14	3.31892e-12	RPL28	102465483	5.76921e-12	13367	10597	10834	4787	2746	2446
4366	ENSG00000198658	17.5411	-1.80194	0.526484	-3.4226	0.000620254	0.00252187	ABHD17AP1	NA	0.00438372	29	31	22	10	8	6
8141	ENSG00000219222	5.70205	-1.80151	0.897289	-2.00773	0.044672	0.098055	RPL12P47	NA	0.169317	6	11	10	2	3	3
14192	ENSG00000185338	1.24264	-1.80148	1.99027	-0.905147	0.365387	NA	SOCS1	8651	0.79447	2	4	0	1	1	0
10499	ENSG00000186326	3.74841	-1.79779	1.22933	-1.46242	0.143627	0.250409	RGS9BP	388531	0.422129	2	12	3	2	3	0
118	ENSG00000143774	676.54	-1.79622	0.197328	-9.10269	8.81223e-20	1.32572e-17	GUK1	2987	2.30447e-17	1053	964	1135	381	263	263
472	ENSG00000142327	735.85	-1.79611	0.242358	-7.41097	1.25377e-13	4.71544e-12	RNPEPL1	NA	8.19676e-12	1421	1098	909	440	295	252
11389	ENSG00000231684	2.46123	-1.79605	1.3796	-1.30186	0.192965	0.314383	EIF1P3	NA	0.522831	5	4	3	2	0	1
535	ENSG00000130255	2312	-1.79601	0.249987	-7.1844	6.7503e-13	2.23984e-11	RPL36	25873	3.89347e-11	3908	3088	3775	1490	916	695
6317	ENSG00000242017	9.36864	-1.79442	0.695957	-2.57835	0.00992742	0.0279112	ALG1L15P	NA	0.0484946	17	12	15	5	4	4
13801	ENSG00000176268	1.23707	-1.79326	1.86312	-0.962503	0.335797	NA	CYCSP34	NA	0.750762	1	2	2	1	1	0
13802	ENSG00000271133	1.23707	-1.79326	1.86312	-0.962503	0.335797	NA	CTA-293F17.1	NA	0.750762	1	2	2	1	1	0
7527	ENSG00000179477	6.95012	-1.79195	0.819533	-2.18656	0.0287749	0.0680992	ALOX12B	242	0.117967	11	13	8	2	4	4
204	ENSG00000115457	467.754	-1.79195	0.211466	-8.47392	2.37261e-17	2.06464e-15	IGFBP2	3485	3.58892e-15	636	830	712	264	174	191
8270	ENSG00000176533	6.14629	-1.79046	0.907969	-1.97194	0.0486165	0.105133	GNG7	2788	0.181404	15	7	7	5	3	1
11	ENSG00000197956	15219.5	-1.79026	0.144303	-12.4062	2.41736e-35	3.90117e-32	S100A6	6277	6.78134e-32	22538	21881	26417	7017	6772	6691
7317	ENSG00000275215	9.91173	-1.78984	0.798743	-2.24082	0.0250376	0.0609026	RNA5-8S5	100008587	0.105577	14	19	14	5	9	0
7318	ENSG00000278233	9.91173	-1.78984	0.798743	-2.24082	0.0250376	0.0609026	RNA5-8S5	100008587	0.105577	14	19	14	5	9	0
1314	ENSG00000272196	147.715	-1.78902	0.312623	-5.72262	1.04895e-08	1.41712e-07	HIST2H2AA4	723790	2.46336e-07	288	139	260	78	75	46
2233	ENSG00000226564	42.1726	-1.78861	0.376771	-4.74722	2.06235e-06	1.63954e-05	FTH1P20	NA	2.84998e-05	70	51	75	25	18	14
1319	ENSG00000203812	147.008	-1.78759	0.312774	-5.71526	1.09536e-08	1.47421e-07	HIST2H2AA3	8337	2.5626e-07	286	138	260	77	75	46
14477	ENSG00000273249	1.22731	-1.78465	2.0317	-0.878401	0.379726	NA	LL09NC01-251B2.3	NA	0.809393	5	1	0	1	1	0
13953	ENSG00000214125	1.22835	-1.78431	1.88851	-0.944826	0.344748	NA	RP3-412A9.15	NA	0.762432	3	1	1	1	1	0
1110	ENSG00000151655	286.05	-1.78283	0.295828	-6.02656	1.67482e-09	2.6785e-08	ITIH2	3698	4.656e-08	314	577	438	77	158	152
14310	ENSG00000205502	1.24361	-1.78146	1.98879	-0.895751	0.370386	NA	C2CD4B	388125	0.798049	0	2	3	1	0	1
7210	ENSG00000258512	7.40718	-1.78136	0.783343	-2.27405	0.0229633	0.0566565	LINC00239	145200	0.0982802	12	9	13	5	3	3
13871	ENSG00000138039	1.24256	-1.77983	1.86045	-0.956666	0.338736	NA	LHCGR	3973	0.753458	1	2	2	1	0	1
13872	ENSG00000176343	1.24256	-1.77983	1.86045	-0.956666	0.338736	NA	RPL37AP8	NA	0.753458	1	2	2	1	0	1
13873	ENSG00000221340	1.24256	-1.77983	1.86045	-0.956666	0.338736	NA	RNU6ATAC18P	NA	0.753458	1	2	2	1	0	1
13884	ENSG00000184911	1.24152	-1.77871	1.8607	-0.955937	0.339104	NA	DMRTC1B	728656	0.75357	2	2	1	1	0	1
13885	ENSG00000269502	1.24152	-1.77871	1.8607	-0.955937	0.339104	NA	DMRTC1	63947	0.75357	2	2	1	1	0	1
13886	ENSG00000280027	1.24152	-1.77871	1.8607	-0.955937	0.339104	NA	RP11-44F14.10	NA	0.75357	2	2	1	1	0	1
11524	ENSG00000231172	2.51467	-1.77757	1.38503	-1.28342	0.199345	0.32248	AC007099.1	101927884	0.533761	2	8	1	1	1	2
14345	ENSG00000255038	1.25337	-1.77492	1.98499	-0.894173	0.371229	NA	RP11-1167A19.2	NA	0.798508	1	4	1	0	2	0
14346	ENSG00000275718	1.25337	-1.77492	1.98499	-0.894173	0.371229	NA	CCL15	6359	0.798508	1	4	1	0	2	0
15105	ENSG00000285458	1.27316	-1.77445	2.19614	-0.807986	0.419099	NA	NA	NA	0.855533	0	6	0	0	1	1
316	ENSG00000174851	723.573	-1.77352	0.222183	-7.98225	1.43685e-15	8.07183e-14	YIF1A	10897	1.40311e-13	1179	1078	1103	448	279	255
7312	ENSG00000273542	7.96473	-1.77315	0.790564	-2.24289	0.024904	0.0606274	HIST1H4K	8362	0.105099	8	18	11	6	3	2
13977	ENSG00000178796	1.23594	-1.77283	1.88529	-0.940353	0.347036	NA	RIIAD1	284485	0.766029	1	1	3	1	0	1
13978	ENSG00000260179	1.23594	-1.77283	1.88529	-0.940353	0.347036	NA	RP5-902P8.12	NA	0.766029	1	1	3	1	0	1
305	ENSG00000184164	347.032	-1.77277	0.221049	-8.0198	1.05922e-15	6.16499e-14	CRELD2	79174	1.07165e-13	522	510	579	202	150	119
101	ENSG00000135940	1196.46	-1.77178	0.192449	-9.20647	3.37011e-20	5.92338e-18	COX5B	1329	1.02965e-17	1533	1836	2185	598	453	575
5281	ENSG00000213023	14.124	-1.7713	0.593092	-2.98655	0.00282147	0.00948434	SYT3	84258	0.0164865	27	22	16	9	6	4
3626	ENSG00000197249	37.1548	-1.7712	0.462897	-3.82633	0.00013007	0.000636792	SERPINA1	5265	0.00110692	25	78	70	16	20	14
86	ENSG00000106400	600.362	-1.77098	0.18749	-9.44576	3.52839e-21	7.28325e-19	ZNHIT1	10467	1.26603e-18	926	811	1049	317	244	255
256	ENSG00000167925	307.723	-1.76928	0.214255	-8.25783	1.4834e-16	1.02862e-14	GHDC	84514	1.78802e-14	478	510	440	172	108	138
14494	ENSG00000188460	1.26549	-1.76699	2.01709	-0.876012	0.381023	NA	ACTBP11	NA	0.811206	1	5	0	0	1	1
461	ENSG00000100121	201.128	-1.76423	0.236139	-7.47116	7.94883e-14	3.0609e-12	GGTLC2	91227	5.32072e-12	269	335	329	116	72	86
4035	ENSG00000250722	22.9043	-1.76261	0.491088	-3.58919	0.000331713	0.00145914	SEPP1	6414	0.0025364	23	38	46	8	13	11
13992	ENSG00000204709	1.25887	-1.76145	1.87735	-0.938268	0.348107	NA	LINC01556	NA	0.767708	1	4	1	0	1	1
185	ENSG00000167526	10888	-1.76062	0.204973	-8.58954	8.73188e-18	8.37883e-16	RPL13	6137	1.45648e-15	19448	15268	15726	6292	4798	3796
15037	ENSG00000156194	1.24118	-1.76004	2.16422	-0.813245	0.416078	NA	PPEF2	5470	0.853737	0	1	5	0	2	0
15038	ENSG00000250794	1.24118	-1.76004	2.16422	-0.813245	0.416078	NA	ALG1L12P	NA	0.853737	0	1	5	0	2	0
10150	ENSG00000088726	3.70437	-1.75979	1.15381	-1.5252	0.127209	0.228402	TMEM40	55287	0.38674	9	2	6	1	3	1
15319	ENSG00000230216	1.22514	-1.75972	2.21551	-0.794272	0.427037	NA	HSPB1P2	NA	0.860195	6	0	0	1	0	1
2153	ENSG00000115286	75.6348	-1.75884	0.36381	-4.83449	1.33489e-06	1.10065e-05	NDUFS7	374291	1.91324e-05	124	102	125	57	23	23
13945	ENSG00000130755	1.25225	-1.75481	1.85576	-0.9456	0.344352	NA	GMFG	9535	0.761939	1	2	2	0	1	1
13946	ENSG00000148795	1.25225	-1.75481	1.85576	-0.9456	0.344352	NA	CYP17A1	1586	0.761939	1	2	2	0	1	1
4610	ENSG00000258920	17.1387	-1.75478	0.531015	-3.30458	0.000951182	0.00366277	FOXN3-AS1	400236	0.00636694	28	24	27	10	5	9
5559	ENSG00000205078	21.5123	-1.75377	0.613184	-2.8601	0.00423507	0.0135242	SYCE1L	100130958	0.0235089	44	22	33	21	4	4
14406	ENSG00000243403	1.2533	-1.75372	1.9839	-0.883978	0.376708	NA	RP11-330L19.1	NA	0.806005	0	2	3	0	1	1
981	ENSG00000141526	75.2493	-1.75182	0.280754	-6.2397	4.38402e-10	7.93324e-09	SLC16A3	102465472	1.37902e-08	110	129	110	38	31	35
9938	ENSG00000261829	3.73619	-1.75157	1.11389	-1.57248	0.115839	0.212369	RP11-223I10.1	NA	0.359685	7	5	6	1	1	4
7650	ENSG00000175899	8.01763	-1.75154	0.812109	-2.15678	0.0310225	0.0722719	A2M	2	0.125136	5	18	15	2	5	4
11670	ENSG00000267390	2.48498	-1.75063	1.38909	-1.26027	0.207571	0.333256	RP11-635N19.1	NA	0.548863	5	2	5	1	0	3
15034	ENSG00000138115	1.27203	-1.75029	2.15135	-0.813577	0.415887	NA	CYP2C8	1558	0.853598	0	5	1	0	0	2
14918	ENSG00000238024	1.23247	-1.74995	2.1275	-0.822537	0.410771	NA	DDX39BP2	NA	0.849618	2	0	3	0	2	0
1420	ENSG00000228232	60.3533	-1.74979	0.313388	-5.58346	2.35779e-08	2.94757e-07	GAPDHP1	NA	5.12372e-07	101	77	102	32	27	24
936	ENSG00000172889	142.341	-1.74964	0.276916	-6.3183	2.6445e-10	5.0155e-09	EGFL7	51162	8.71836e-09	205	253	201	92	53	50
15046	ENSG00000275557	1.27099	-1.74904	2.15172	-0.812857	0.4163	NA	RP11-353N4.6	NA	0.853737	1	5	0	0	0	2
14046	ENSG00000228278	1.24563	-1.74726	1.88053	-0.92913	0.352822	NA	ORM2	5005	0.775068	1	1	3	0	1	1
14047	ENSG00000242221	1.24563	-1.74726	1.88053	-0.92913	0.352822	NA	PSG2	5670	0.775068	1	1	3	0	1	1
13979	ENSG00000172247	1.24459	-1.74666	1.85758	-0.94029	0.347069	NA	C1QTNF4	114900	0.766029	2	1	2	0	1	1
13980	ENSG00000188536	1.24459	-1.74666	1.85758	-0.94029	0.347069	NA	HBA2	3040	0.766029	2	1	2	0	1	1
13981	ENSG00000225339	1.24459	-1.74666	1.85758	-0.94029	0.347069	NA	RP11-513I15.6	NA	0.766029	2	1	2	0	1	1
21	ENSG00000100031	1540.95	-1.74612	0.1638	-10.6601	1.56478e-26	1.32276e-23	GGT1	102724197	2.29933e-23	2312	2346	2465	798	598	727
7049	ENSG00000235587	10.1559	-1.74551	0.749173	-2.32991	0.0198107	0.04999	GAPDHP65	NA	0.0867242	19	12	16	9	4	1
8341	ENSG00000237976	5.47617	-1.74545	0.893195	-1.95416	0.0506823	0.108726	RP11-126K1.6	NA	0.187502	9	8	8	3	2	3
14058	ENSG00000258099	1.24354	-1.74498	1.88104	-0.927667	0.35358	NA	ATXN2-AS	NA	0.776126	3	1	1	0	1	1
78	ENSG00000024422	2192.08	-1.74441	0.18372	-9.49495	2.20324e-21	5.01434e-19	EHD2	30846	8.71634e-19	4109	3178	2843	1122	959	941
11149	ENSG00000234106	2.97481	-1.74218	1.2963	-1.34396	0.178962	0.297048	RP11-288E14.2	NA	0.495327	3	4	7	3	0	1
530	ENSG00000269028	465.697	-1.74208	0.241886	-7.20208	5.93013e-13	1.98626e-11	MTRNR2L12	100462981	3.45268e-11	506	717	929	219	177	247
160	ENSG00000172270	6756.65	-1.74183	0.19895	-8.75512	2.03887e-18	2.26213e-16	BSG	682	3.93222e-16	9658	11581	9970	3908	2369	3054
9906	ENSG00000137860	4.28267	-1.74088	1.10055	-1.58183	0.113689	0.209032	SLC28A2	9153	0.354151	1	12	7	2	3	2
151	ENSG00000160948	609.823	-1.73861	0.196822	-8.83342	1.01527e-18	1.19358e-16	VPS28	51160	2.07478e-16	936	844	1036	348	248	247
344	ENSG00000104522	704.963	-1.73823	0.219849	-7.90645	2.64836e-15	1.36668e-13	TSTA3	7264	2.37568e-13	1188	949	1118	401	345	229
9476	ENSG00000270039	4.27187	-1.7371	1.03687	-1.67533	0.0938704	0.179201	RP11-571M6.17	NA	0.305683	6	11	3	2	3	2
3439	ENSG00000114455	36.6966	-1.737	0.442851	-3.92232	8.77014e-05	0.000452607	HHLA2	11148	0.000786759	35	89	46	13	18	19
4022	ENSG00000132465	20.7317	-1.73674	0.483014	-3.59563	0.000323606	0.00142831	JCHAIN	3512	0.0024828	35	34	26	9	9	12
65	ENSG00000042493	350.052	-1.73591	0.179734	-9.65825	4.53533e-22	1.23863e-19	CAPG	822	2.1531e-19	535	539	541	183	150	152
10754	ENSG00000135406	2.99878	-1.73584	1.225	-1.41701	0.15648	0.267692	PRPH	5630	0.449011	2	6	6	2	1	1
1453	ENSG00000128228	253.816	-1.73417	0.313101	-5.5387	3.04728e-08	3.72301e-07	SDF2L1	23753	6.47165e-07	420	372	380	190	94	67
5104	ENSG00000243904	22.5751	-1.73407	0.565993	-3.06377	0.0021857	0.00760199	RPSAP5	NA	0.0132144	41	22	41	20	6	5
17	ENSG00000117448	1005.66	-1.73371	0.149772	-11.5757	5.47535e-31	5.71755e-28	AKR1A1	10327	9.93872e-28	1541	1471	1628	491	457	446
1128	ENSG00000218227	91.7933	-1.7333	0.289652	-5.98407	2.17629e-09	3.42495e-08	RP11-889L3.1	NA	5.95354e-08	163	104	156	50	39	38
698	ENSG00000065618	288.463	-1.73259	0.255184	-6.78957	1.12467e-11	2.85836e-10	COL17A1	100126326	4.96864e-10	478	354	499	102	184	114
4052	ENSG00000128564	47.1755	-1.73239	0.483993	-3.57938	0.000344412	0.00150888	VGF	7425	0.00262287	34	105	79	37	12	17
1417	ENSG00000100300	619.338	-1.73113	0.309858	-5.58684	2.31245e-08	2.89701e-07	TSPO	706	5.03582e-07	1207	771	878	434	274	151
5779	ENSG00000230364	18.3515	-1.73104	0.62311	-2.77806	0.00546844	0.016798	RPL4P3	NA	0.0291997	40	18	27	17	5	4
1967	ENSG00000179403	125.621	-1.73079	0.345756	-5.00582	5.56247e-07	5.0191e-06	VWA1	64856	8.72462e-06	191	205	184	98	34	42
6994	ENSG00000133067	13.5083	-1.7306	0.73774	-2.34581	0.0189859	0.0482653	LGR6	59352	0.0837669	6	19	38	4	4	11
137	ENSG00000104979	679.204	-1.73054	0.192865	-8.97279	2.89102e-19	3.74608e-17	C19orf53	28974	6.51175e-17	1041	973	1118	392	279	273
14522	ENSG00000249956	1.25113	-1.73009	1.98346	-0.872259	0.383067	NA	UGT2B24P	NA	0.813984	1	1	3	0	0	2
10950	ENSG00000263105	3.00323	-1.73008	1.25243	-1.38138	0.167163	0.281554	RP11-95P2.3	NA	0.471052	3	6	5	2	0	2
10751	ENSG00000181378	2.9845	-1.72928	1.21954	-1.41798	0.156197	0.267285	CFAP65	255101	0.448325	3	4	7	2	1	1
5524	ENSG00000228205	13.21	-1.72915	0.600526	-2.87939	0.00398442	0.0128044	RP11-778D9.4	NA	0.0222576	23	19	19	8	7	4
14532	ENSG00000266801	1.24904	-1.72769	1.98406	-0.870786	0.383871	NA	RP11-521L9.2	NA	0.815132	3	1	1	0	0	2
365	ENSG00000172428	445.465	-1.72632	0.220715	-7.82149	5.22005e-15	2.53881e-13	COPS9	150678	4.41316e-13	547	650	856	244	198	178
2138	ENSG00000103254	166.479	-1.72617	0.356258	-4.84528	1.2643e-06	1.04934e-05	FAM173A	65990	1.82404e-05	244	236	287	136	43	53
13507	ENSG00000243024	1.73991	-1.72327	1.73273	-0.994542	0.319959	NA	RPS11P6	NA	0.730944	1	2	5	2	0	0
531	ENSG00000172725	810.376	-1.72178	0.239226	-7.1973	6.14173e-13	2.05326e-11	CORO1B	57175	3.56914e-11	1377	1185	1169	527	340	264
149	ENSG00000100949	294.779	-1.72161	0.194048	-8.87206	7.18045e-19	8.55486e-17	RABGGTA	5875	1.48708e-16	474	417	467	158	132	121
483	ENSG00000130731	283.617	-1.72079	0.233193	-7.37927	1.59158e-13	5.84962e-12	METTL26	84326	1.01683e-11	454	446	406	179	108	109
909	ENSG00000176410	128.084	-1.72039	0.269747	-6.37778	1.79676e-10	3.50893e-09	DNAJC30	84277	6.09951e-09	202	171	217	70	69	40
7157	ENSG00000244486	9.4511	-1.71839	0.750379	-2.29003	0.0220196	0.0547237	SCARF2	91179	0.0949393	20	11	13	8	3	2
298	ENSG00000063177	6910.13	-1.71818	0.213306	-8.05499	7.94872e-16	4.73509e-14	RPL18	6141	8.23093e-14	11131	9570	11096	4320	2905	2439
314	ENSG00000114395	154.954	-1.71649	0.215028	-7.98266	1.43212e-15	8.07183e-14	CYB561D2	11068	1.40311e-13	236	241	236	74	78	65
15102	ENSG00000254485	1.24242	-1.71595	2.12219	-0.808575	0.418759	NA	RP11-380O24.1	NA	0.855533	3	0	2	0	0	2
1888	ENSG00000175701	150.915	-1.71559	0.337065	-5.08978	3.58487e-07	3.37069e-06	LINC00116	NA	5.85922e-06	205	197	292	113	42	56
8324	ENSG00000095585	7.28292	-1.7154	0.875965	-1.9583	0.0501947	0.10785	BLNK	29760	0.186077	3	12	18	2	5	4
45	ENSG00000171298	1025.32	-1.71379	0.170086	-10.076	7.05281e-24	2.78226e-21	GAA	2548	4.83635e-21	1581	1458	1676	552	469	416
580	ENSG00000107281	248.336	-1.71365	0.241568	-7.09387	1.30415e-12	3.9916e-11	NPDC1	56654	6.93852e-11	362	411	370	156	85	106
15330	ENSG00000108255	1.24137	-1.71357	2.16242	-0.792429	0.42811	NA	CRYBA1	1411	0.86175	5	0	1	0	0	2
908	ENSG00000147804	176.274	-1.71342	0.268627	-6.37841	1.78931e-10	3.49821e-09	SLC39A4	55630	6.08088e-09	280	246	285	118	65	64
4594	ENSG00000156966	32.9018	-1.71266	0.517347	-3.31046	0.000931433	0.00359922	B3GNT7	93010	0.00625646	73	39	40	27	14	5
26	ENSG00000104805	2026.65	-1.71116	0.161564	-10.5912	3.27283e-26	2.172e-23	NUCB1	4924	3.77555e-23	2838	3384	3093	1065	844	935
8388	ENSG00000227848	6.54296	-1.70879	0.879832	-1.94218	0.0521151	0.111178	SUCLA2-AS1	NA	0.191715	6	14	10	5	1	4
5312	ENSG00000224677	45.0561	-1.70657	0.573921	-2.97353	0.00294395	0.00983829	PDIA3P2	NA	0.0171017	71	68	67	48	9	5
3176	ENSG00000100079	97.6286	-1.70641	0.418122	-4.08112	4.48192e-05	0.000250513	LGALS2	3957	0.000435463	57	218	173	58	31	49
742	ENSG00000127324	260.147	-1.70631	0.255328	-6.68281	2.34399e-11	5.60788e-10	TSPAN8	7103	9.74809e-10	445	425	325	107	168	91
9997	ENSG00000185038	4.26365	-1.70523	1.09351	-1.55941	0.118899	0.216704	MROH2A	339766	0.36701	6	5	9	0	3	3
12913	ENSG00000234311	1.75517	-1.70411	1.58347	-1.07619	0.281842	NA	RP11-432J24.3	NA	0.673511	2	4	2	2	1	0
9141	ENSG00000267309	4.74929	-1.70403	0.974633	-1.74838	0.0803986	0.158564	CTD-2630F21.1	728752	0.271408	9	6	7	2	3	1
4592	ENSG00000167588	33.8886	-1.70077	0.513715	-3.31072	0.000930566	0.00359743	GPD1	2819	0.00625335	18	84	54	19	13	16
13104	ENSG00000221947	1.7496	-1.70072	1.61818	-1.05101	0.293256	NA	XKR9	389668	0.690546	1	2	5	2	1	0
7121	ENSG00000175538	9.05549	-1.69772	0.737554	-2.30182	0.0213452	0.0533099	KCNE3	10008	0.0924856	11	13	17	2	5	6
253	ENSG00000104870	212.289	-1.69742	0.205243	-8.2703	1.33628e-16	9.37614e-15	FCGRT	2217	1.62984e-14	313	312	349	114	96	89
2572	ENSG00000250834	56.3095	-1.69646	0.377519	-4.4937	6.99951e-06	4.83108e-05	KRT18P54	NA	8.39778e-05	98	55	105	22	20	38
1424	ENSG00000168061	148.267	-1.6959	0.303896	-5.58054	2.39772e-08	2.98907e-07	SAC3D1	29901	5.19585e-07	247	221	212	109	52	49
11286	ENSG00000221866	3.01147	-1.69531	1.28436	-1.31997	0.186846	0.306807	PLXNA4	91584	0.510872	6	4	5	0	3	1
13602	ENSG00000228791	1.75857	-1.69525	1.72883	-0.980576	0.326802	NA	THRB-AS1	NA	0.741284	5	4	0	2	0	1
625	ENSG00000179526	612.865	-1.69313	0.243511	-6.95299	3.57612e-12	1.01573e-10	SHARPIN	81858	1.76563e-10	1046	870	893	413	239	217
13300	ENSG00000144648	1.73879	-1.69302	1.65985	-1.01999	0.307736	NA	ACKR2	1238	0.713993	6	1	1	2	1	0
142	ENSG00000166311	316.268	-1.6921	0.189318	-8.93786	3.9677e-19	4.96018e-17	SMPD1	6609	8.6222e-17	429	521	500	147	137	165
3014	ENSG00000085831	44.3768	-1.69158	0.40427	-4.18428	2.86075e-05	0.000168494	TTC39A	22996	0.00029289	45	78	80	12	26	26
9283	ENSG00000253404	4.7602	-1.6915	0.983051	-1.72066	0.0853125	0.166005	AC034243.1	105379194	0.283591	8	5	9	2	1	4
40	ENSG00000146066	917.63	-1.69145	0.166488	-10.1596	3.00332e-24	1.33287e-21	HIGD2A	192286	2.31691e-21	1362	1468	1373	492	375	434
6179	ENSG00000183248	12.3067	-1.69135	0.643721	-2.62746	0.00860241	0.0247183	PRR36	80164	0.0429605	22	21	14	9	6	3
481	ENSG00000139239	431.079	-1.69088	0.228964	-7.38495	1.52513e-13	5.62871e-12	RPL14P1	NA	9.7843e-12	707	577	691	268	193	150
548	ENSG00000167969	592.309	-1.6904	0.236394	-7.15076	8.62974e-13	2.79553e-11	ECI1	1632	4.85943e-11	870	852	991	394	216	231
9205	ENSG00000134201	6.08351	-1.68895	0.972347	-1.73698	0.0823902	0.161452	GSTM5	2949	0.276197	7	13	8	1	1	7
8004	ENSG00000170956	6.51635	-1.68847	0.824668	-2.04745	0.0406141	0.0905869	CEACAM3	1084	0.15658	12	7	10	3	3	4
107	ENSG00000167740	264.473	-1.68718	0.184149	-9.16205	5.09219e-20	8.44828e-18	CYB5D2	124936	1.46855e-17	387	420	404	130	120	126
13320	ENSG00000213574	1.74848	-1.68617	1.65815	-1.0169	0.309201	NA	LDHAP5	NA	0.716317	1	1	6	2	0	1
5078	ENSG00000167733	22.6084	-1.68602	0.547504	-3.07946	0.00207373	0.00724948	HSD11B1L	374875	0.0126016	34	37	33	21	5	6
463	ENSG00000169100	4980.6	-1.6852	0.225993	-7.45687	8.86025e-14	3.39713e-12	SLC25A6	293	5.90518e-12	8707	7071	7018	3277	1904	1907
1717	ENSG00000106992	74.0469	-1.68463	0.320023	-5.26408	1.40891e-07	1.45667e-06	AK1	203	2.5321e-06	143	98	98	40	41	24
2893	ENSG00000243674	33.6395	-1.68434	0.395051	-4.26359	2.01167e-05	0.00012344	OR7E66P	NA	0.000214574	61	42	50	16	19	13
13241	ENSG00000260046	1.77907	-1.68386	1.63637	-1.02902	0.303472	NA	RP11-454K7.3	NA	0.707237	0	5	3	1	1	1
10414	ENSG00000236562	3.50672	-1.68361	1.13905	-1.47809	0.139385	0.24455	RP11-396M11.1	NA	0.413014	3	4	9	2	2	1
6040	ENSG00000163286	14.7143	-1.68338	0.629102	-2.67585	0.00745397	0.0219114	ALPPL2	251	0.0380819	14	39	15	9	6	6
932	ENSG00000177854	98.0982	-1.68258	0.26611	-6.32288	2.56736e-10	4.8901e-09	TMEM187	8269	8.50037e-09	151	148	151	59	37	43
343	ENSG00000108784	428.358	-1.68154	0.212661	-7.90715	2.63346e-15	1.36295e-13	NAGLU	4669	2.36919e-13	538	694	728	245	164	201
5709	ENSG00000126460	17.0305	-1.68147	0.599044	-2.80692	0.0050017	0.0155527	PRRG2	5639	0.0270349	44	18	16	9	10	5
3331	ENSG00000166143	30.9537	-1.67858	0.421217	-3.98507	6.74595e-05	0.000359514	PPP1R14D	54866	0.000624937	52	50	40	21	13	11
1108	ENSG00000152082	203.411	-1.6783	0.27845	-6.0273	1.66725e-09	2.67121e-08	MZT2B	80097	4.64333e-08	301	308	322	145	77	68
5891	ENSG00000116035	14.5619	-1.67801	0.614182	-2.7321	0.00629316	0.0189639	VAX2	25806	0.0329646	18	18	31	11	3	6
124	ENSG00000006534	3427.43	-1.6775	0.185062	-9.0645	1.2518e-19	1.7921e-17	ALDH3B1	221	3.11517e-17	6287	4427	4953	1773	1733	1392
1659	ENSG00000103024	191.269	-1.67735	0.315056	-5.32396	1.01533e-07	1.08645e-06	NME3	4832	1.88855e-06	242	305	329	146	60	66
3681	ENSG00000175886	28.599	-1.67677	0.441885	-3.79458	0.000147894	0.000713219	RPL7AP66	NA	0.00123978	52	32	47	18	13	10
13151	ENSG00000099617	1.75058	-1.67558	1.60597	-1.04335	0.296788	NA	EFNA2	1943	0.696395	3	1	3	1	2	0
770	ENSG00000183011	373.111	-1.67391	0.252786	-6.62184	3.54753e-11	8.17866e-10	NAA38	84316	1.42168e-09	495	543	667	252	141	141
8639	ENSG00000217950	5.79872	-1.67371	0.891923	-1.87651	0.0605847	0.125834	NOC2LP2	NA	0.216405	7	11	9	5	2	2
13185	ENSG00000243135	1.78352	-1.67309	1.61246	-1.0376	0.299456	NA	UGT1A3	54659	0.700844	1	5	2	1	0	2
3889	ENSG00000169583	28.4678	-1.67283	0.456246	-3.66652	0.000245878	0.00112235	CLIC3	9022	0.00195097	44	46	40	21	8	12
10364	ENSG00000261594	3.55807	-1.67096	1.12344	-1.48736	0.136919	0.24125	TPBGL	100507050	0.407666	3	8	5	1	3	2
12890	ENSG00000262668	1.76164	-1.67034	1.54698	-1.07974	0.280258	NA	AJ003147.9	NA	0.670922	5	2	1	1	1	1
59	ENSG00000162244	5864.82	-1.66909	0.17147	-9.73399	2.1595e-22	6.49753e-20	RPL29	6159	1.12946e-19	9815	7930	9026	3235	2807	2376
1992	ENSG00000092096	94.7668	-1.66889	0.334745	-4.98555	6.17869e-07	5.50623e-06	SLC22A17	51310	9.57139e-06	90	159	184	54	31	51
4617	ENSG00000168481	18.1986	-1.6687	0.50541	-3.30167	0.000961101	0.00369536	LGI3	203190	0.00642358	26	32	25	9	8	10
8847	ENSG00000250451	5.79341	-1.66865	0.914656	-1.82434	0.0681	0.138383	HOXC-AS1	100874363	0.23753	11	9	6	5	1	3
56	ENSG00000105677	1519.51	-1.66854	0.170247	-9.80068	1.11827e-22	3.54492e-20	TMEM147	10430	6.16208e-20	2321	2287	2328	874	653	655
46	ENSG00000126432	2741.88	-1.6682	0.166264	-10.0335	1.08648e-23	4.19287e-21	PRDX5	25824	7.2884e-21	4041	4238	4236	1561	1143	1233
7325	ENSG00000261713	9.33765	-1.66806	0.745465	-2.23761	0.0252467	0.0613607	SSTR5-AS1	146336	0.106357	7	14	22	5	6	3
13860	ENSG00000197893	1.79328	-1.6678	1.74117	-0.957863	0.338132	NA	NRAP	4892	0.75278	2	6	0	0	2	1
7826	ENSG00000234335	7.05173	-1.66776	0.793283	-2.10236	0.035522	0.0809898	RPS4XP11	NA	0.140064	11	8	13	3	3	4
209	ENSG00000104823	1765.77	-1.66743	0.196951	-8.4662	2.5353e-17	2.15343e-15	ECH1	1891	3.74327e-15	2534	2936	2588	1068	806	663
3011	ENSG00000203724	47.6806	-1.66673	0.398074	-4.18698	2.82688e-05	0.000166665	C1orf53	388722	0.000289711	51	71	96	32	14	23
1186	ENSG00000173272	234.453	-1.66635	0.281647	-5.91644	3.28989e-09	4.92429e-08	MZT2A	100616378	8.55981e-08	408	344	318	169	85	82
607	ENSG00000131669	405.698	-1.66549	0.237229	-7.02059	2.20934e-12	6.46133e-11	NINJ1	4814	1.12316e-10	681	547	624	248	204	131
1087	ENSG00000175938	95.7376	-1.6652	0.274274	-6.0713	1.26876e-09	2.07204e-08	ORAI3	93129	3.60179e-08	141	122	175	48	52	38
2868	ENSG00000267106	35.794	-1.66354	0.389122	-4.27511	1.91045e-05	0.000118251	ZNF561-AS1	284385	0.000205553	66	45	52	13	20	18
13654	ENSG00000251532	1.75155	-1.66167	1.70066	-0.977072	0.328534	NA	CTD-2245E15.3	NA	0.742485	1	0	7	1	1	1
980	ENSG00000227615	171.011	-1.66094	0.266178	-6.23996	4.37689e-10	7.92843e-09	RP11-864N7.2	NA	1.37819e-08	253	184	342	75	78	94
13103	ENSG00000272459	1.78005	-1.65923	1.57849	-1.05115	0.29319	NA	RP11-1277A3.3	NA	0.690473	2	4	2	0	2	1
3800	ENSG00000164845	25.8419	-1.65857	0.445971	-3.719	0.00020001	0.000934364	FAM86FP	NA	0.00162419	32	44	42	9	14	15
13194	ENSG00000225026	1.779	-1.65804	1.60146	-1.03533	0.300516	NA	AC091492.2	NA	0.702843	3	4	1	0	2	1
9237	ENSG00000126218	6.36922	-1.65803	0.958244	-1.73028	0.0835798	0.163316	F10	2159	0.279188	2	17	10	5	1	4
211	ENSG00000167861	381.03	-1.65715	0.195862	-8.46083	2.6549e-17	2.23364e-15	HID1	283987	3.8827e-15	675	547	514	199	192	159
8555	ENSG00000228502	5.79406	-1.65677	0.872735	-1.89836	0.0576485	0.120838	EEF1A1P11	NA	0.207939	11	7	8	3	3	2
2417	ENSG00000239697	40.1994	-1.65659	0.35949	-4.60816	4.06247e-06	2.98374e-05	TNFSF12	8742	5.18658e-05	52	60	71	20	18	20
4264	ENSG00000167608	35.7424	-1.65623	0.476478	-3.476	0.000508961	0.00211868	TMC4	147798	0.00368286	75	40	48	21	25	6
1515	ENSG00000179862	281.647	-1.65615	0.303025	-5.46538	4.61915e-08	5.41248e-07	CITED4	163732	9.40842e-07	496	387	400	217	101	88
6171	ENSG00000214541	14.8679	-1.65594	0.629637	-2.62999	0.00853868	0.024567	RPS4XP3	NA	0.0426976	20	20	27	12	8	2
10671	ENSG00000161944	4.02344	-1.65554	1.15619	-1.43189	0.152175	0.26217	ASGR2	433	0.440053	3	4	11	2	3	0
8593	ENSG00000170955	8.53305	-1.65496	0.876171	-1.88886	0.0589112	0.122991	PRKCDBP	112464	0.211554	22	8	9	7	5	0
12523	ENSG00000104901	2.29829	-1.65458	1.46646	-1.12829	0.259199	0.393331	DKKL1	27120	0.638684	1	7	2	2	2	0
452	ENSG00000111775	2150.46	-1.65434	0.221005	-7.48552	7.12621e-14	2.79877e-12	COX6A1	1337	4.86505e-12	2303	3285	4204	951	976	1184
7683	ENSG00000225986	7.60802	-1.65375	0.770055	-2.14757	0.031748	0.0736815	UBXN10-AS1	101928017	0.127513	9	13	13	3	3	5
9855	ENSG00000007216	5.8881	-1.65328	1.0378	-1.59306	0.111148	0.205338	SLC13A2	9058	0.348026	1	17	9	2	1	5
1334	ENSG00000099377	83.7085	-1.65327	0.290485	-5.69139	1.26008e-08	1.67683e-07	HSD3B7	80270	2.9148e-07	101	157	123	44	34	43
1530	ENSG00000167705	96.77	-1.65268	0.303127	-5.4521	4.97791e-08	5.77568e-07	RILP	83547	1.00398e-06	133	138	170	60	52	28
3487	ENSG00000158792	50.7052	-1.65228	0.424273	-3.89438	9.84497e-05	0.000501198	SPATA2L	124044	0.000871224	84	68	79	43	19	12
13270	ENSG00000185942	1.77133	-1.65185	1.61348	-1.02378	0.30594	NA	NKAIN3	NA	0.711432	5	2	1	0	2	1
7007	ENSG00000272369	9.33867	-1.6499	0.704444	-2.34212	0.0191744	0.0486748	RP11-446N19.1	NA	0.0844416	16	9	17	3	5	5
286	ENSG00000168701	354.235	-1.64905	0.202995	-8.12361	4.52507e-16	2.80871e-14	TMEM208	29100	4.88233e-14	514	493	605	202	172	140
9736	ENSG00000177989	4.04453	-1.64885	1.02013	-1.61631	0.106026	0.197767	ODF3B	440836	0.336044	7	6	6	2	2	2
6011	ENSG00000260963	12.1628	-1.64875	0.613773	-2.68625	0.00722585	0.0213433	RP11-297L17.2	NA	0.0370946	14	20	22	6	6	5
1097	ENSG00000185803	639.525	-1.64772	0.272075	-6.05612	1.39441e-09	2.25648e-08	SLC52A2	79581	3.92239e-08	1028	930	951	470	263	195
1271	ENSG00000160325	86.8857	-1.6462	0.284677	-5.78269	7.35149e-09	1.02678e-07	CACFD1	11094	1.78483e-07	134	144	117	55	36	35
13159	ENSG00000234337	1.77788	-1.64379	1.57829	-1.0415	0.297642	NA	RP11-297L17.6	NA	0.697973	3	2	2	0	1	2
239	ENSG00000176532	284.015	-1.64363	0.19769	-8.31416	9.24009e-17	6.86318e-15	PRR15	222171	1.19302e-14	413	430	448	148	112	153
2755	ENSG00000139725	126.814	-1.64351	0.376915	-4.36041	1.29817e-05	8.36482e-05	RHOF	54509	0.000145404	219	159	198	110	37	36
1089	ENSG00000233913	78.8045	-1.64301	0.27075	-6.06839	1.29197e-09	2.10606e-08	RPL10P9	NA	3.66093e-08	115	117	127	37	36	42
147	ENSG00000136942	3123.06	-1.64277	0.184837	-8.88766	6.24075e-19	7.53644e-17	RPL35	11224	1.31005e-16	4537	4357	5300	1843	1453	1248
9768	ENSG00000274818	4.05527	-1.64181	1.0205	-1.60883	0.107653	0.200321	RP1-292L20.3	NA	0.340086	6	6	7	2	3	2
8647	ENSG00000249992	6.81299	-1.64147	0.875487	-1.87492	0.0608032	0.126169	TMEM158	25907	0.216985	16	9	6	6	3	1
2052	ENSG00000125611	132.84	-1.64093	0.332026	-4.94218	7.72531e-07	6.68221e-06	CHCHD5	84269	1.16156e-05	195	183	226	105	50	38
883	ENSG00000117983	42290.8	-1.64085	0.255324	-6.42652	1.30555e-10	2.62015e-09	MUC5B	727897	4.55456e-09	56265	70851	65018	19319	12790	29502
3077	ENSG00000229809	45.0962	-1.64049	0.395991	-4.14274	3.43174e-05	0.000197986	ZNF688	146542	0.000344156	51	70	84	32	20	13
6957	ENSG00000165376	2048.08	-1.63967	0.695468	-2.35765	0.018391	0.0470023	CLDN2	9075	0.0815741	1334	4392	3576	637	594	1755
771	ENSG00000088992	579.579	-1.6392	0.247682	-6.61815	3.63725e-11	8.37463e-10	TESC	54997	1.45575e-09	643	1184	805	328	220	297
9930	ENSG00000258016	4.54607	-1.63889	1.04039	-1.57527	0.115194	0.211343	HIGD1AP1	NA	0.357941	7	6	8	3	3	0
191	ENSG00000148290	327.302	-1.63887	0.192326	-8.52129	1.5778e-17	1.46644e-15	SURF1	6834	2.54909e-15	444	478	565	153	148	176
756	ENSG00000175756	598.605	-1.63646	0.24648	-6.63931	3.15151e-11	7.39992e-10	AURKAIP1	54998	1.28631e-09	911	853	954	423	226	225
9967	ENSG00000228407	4.07158	-1.63624	1.04487	-1.56597	0.117356	0.214529	RP4-800M22.1	NA	0.363335	6	7	6	1	3	2
11215	ENSG00000155966	4.11428	-1.63603	1.2281	-1.33216	0.182808	0.301851	AFF2	2334	0.502994	0	12	7	1	2	4
1879	ENSG00000186940	89.3813	-1.63583	0.321071	-5.0949	3.48931e-07	3.29655e-06	CHCHD2P9	NA	5.73034e-06	127	122	157	61	43	26
6126	ENSG00000272142	13.9491	-1.63461	0.617739	-2.64612	0.00814211	0.0235981	RP11-428J1.5	NA	0.0410136	28	19	16	3	10	7
2871	ENSG00000004848	50.0768	-1.63276	0.381986	-4.27439	1.91661e-05	0.000118508	ARX	170302	0.000206001	56	83	89	28	14	32
10245	ENSG00000276075	4.06174	-1.63127	1.08133	-1.50858	0.131407	0.233999	CTD-2012K14.8	NA	0.395798	3	5	10	2	1	4
12906	ENSG00000250053	2.27836	-1.63124	1.51451	-1.07707	0.281447	NA	RARRES2P4	NA	0.672935	0	2	8	2	1	1
626	ENSG00000178057	320.205	-1.63001	0.23449	-6.95128	3.6199e-12	1.02652e-10	NDUFAF3	25915	1.78439e-10	505	503	445	214	129	126
41	ENSG00000074842	1038.18	-1.6288	0.160671	-10.1375	3.76627e-24	1.6307e-21	MYDGF	56005	2.83462e-21	1458	1618	1631	567	495	459
12111	ENSG00000228868	2.27627	-1.62869	1.36763	-1.19089	0.233699	NA	MYLKP1	NA	0.595448	2	2	6	2	1	1
10161	ENSG00000226499	4.05302	-1.62848	1.06887	-1.52355	0.127622	0.228889	RP5-882O7.1	NA	0.387575	6	4	9	2	1	4
271	ENSG00000215182	30605.4	-1.62831	0.19883	-8.18945	2.62431e-16	1.71907e-14	MUC5AC	4586	2.98823e-14	53949	45745	39057	14690	18313	11879
3081	ENSG00000172794	34.5236	-1.6283	0.393423	-4.1388	3.49132e-05	0.000201162	RAB37	326624	0.000349676	65	50	42	14	20	17
7211	ENSG00000272523	9.09775	-1.62812	0.716021	-2.27384	0.0229755	0.0566788	LINC01023	100652853	0.0983188	17	9	15	6	3	4
13140	ENSG00000253966	2.2544	-1.62797	1.55771	-1.0451	0.295976	NA	CTC-455F18.3	NA	0.695071	6	0	5	2	2	0
5972	ENSG00000175730	14.1622	-1.62725	0.602405	-2.70126	0.00690772	0.0205369	BAK1P1	NA	0.035693	26	17	22	11	4	5
7237	ENSG00000224805	9.16731	-1.62651	0.71713	-2.26809	0.0233237	0.0573466	LINC00853	100874253	0.0994505	10	17	15	4	7	3
347	ENSG00000229117	1899.66	-1.62479	0.205925	-7.89019	3.01737e-15	1.54012e-13	RPL41	6171	2.67716e-13	3020	2484	3104	1211	805	774
375	ENSG00000012171	2328.47	-1.62478	0.208482	-7.7934	6.52305e-15	3.08792e-13	SEMA3B	102465526	5.36768e-13	3032	3232	4286	1428	936	1056
506	ENSG00000105373	2018.18	-1.62458	0.222749	-7.29334	3.02373e-13	1.06081e-11	GLTSCR2	29997	1.84399e-11	3840	2767	2537	1245	950	770
12218	ENSG00000131910	2.775	-1.62428	1.3887	-1.16964	0.242146	0.374604	NR0B2	8431	0.611569	8	4	1	3	1	0
2758	ENSG00000237310	36.5794	-1.62275	0.372237	-4.35944	1.30394e-05	8.3929e-05	GS1-124K5.4	100289098	0.000145892	64	53	49	18	20	16
5141	ENSG00000225405	25.2996	-1.62257	0.533359	-3.04216	0.00234883	0.00811058	RPS15AP17	NA	0.0140985	39	19	57	12	7	19
3484	ENSG00000096006	57.4725	-1.62255	0.416397	-3.89664	9.75363e-05	0.000496976	CRISP3	10321	0.000863885	49	110	102	15	29	41
299	ENSG00000105379	414.865	-1.62232	0.201447	-8.05332	8.05783e-16	4.78403e-14	ETFB	2109	8.316e-14	648	563	668	250	190	170
1456	ENSG00000235043	108.234	-1.6214	0.292827	-5.53705	3.07606e-08	3.75043e-07	TECRP1	NA	6.5193e-07	184	163	144	75	37	47
220	ENSG00000141741	578.997	-1.62132	0.192863	-8.40659	4.22119e-17	3.40612e-15	MIEN1	84299	5.92079e-15	749	809	1064	279	265	309
1775	ENSG00000105258	91.6008	-1.62102	0.312124	-5.19351	2.06367e-07	2.0639e-06	POLR2I	5438	3.58765e-06	141	120	154	66	32	36
1185	ENSG00000026297	87.8135	-1.62082	0.27391	-5.91736	3.27156e-09	4.90099e-08	RNASET2	8635	8.51932e-08	123	136	139	40	36	54
12058	ENSG00000283240	2.29258	-1.61946	1.35014	-1.19948	0.230342	0.360426	RP11-239A17.1	NA	0.589475	2	4	5	1	2	1
7209	ENSG00000175294	9.18276	-1.61839	0.711429	-2.27484	0.0229155	0.0565465	CATSPER1	117144	0.0980893	16	17	9	3	6	4
718	ENSG00000132744	167.413	-1.61839	0.239917	-6.74561	1.52389e-11	3.7677e-10	ACY3	91703	6.54933e-10	233	294	232	100	81	65
55	ENSG00000107874	570.157	-1.61781	0.164928	-9.80915	1.02827e-22	3.31889e-20	CUEDC2	79004	5.76917e-20	891	830	860	310	273	257
63	ENSG00000188643	2943.64	-1.61777	0.167075	-9.68289	3.56483e-22	1.00449e-19	S100A16	140576	1.74609e-19	4494	4711	4117	1706	1271	1364
12238	ENSG00000283537	2.28944	-1.61745	1.38593	-1.16705	0.24319	0.375695	RP11-298A10.2	NA	0.613201	6	4	1	1	2	1
53	ENSG00000034510	13364.8	-1.6171	0.164722	-9.81714	9.50044e-23	3.18211e-20	TMSB10	9168	5.53141e-20	18950	20041	21485	7753	6245	5716
7891	ENSG00000197238	7.92208	-1.617	0.774866	-2.08682	0.0369047	0.0834562	HIST1H4J	8363	0.144317	8	18	10	6	3	3
4497	ENSG00000227258	34.7844	-1.61666	0.481232	-3.35941	0.00078109	0.00308337	SMIM2-AS1	NA	0.00535977	37	67	52	10	10	31
339	ENSG00000224877	586.658	-1.616	0.204153	-7.91563	2.46011e-15	1.28826e-13	C17orf89	284184	2.23935e-13	929	799	926	360	279	226
241	ENSG00000137818	13904.1	-1.61576	0.194473	-8.30842	9.69813e-17	7.14362e-15	RPLP1	6176	1.24176e-14	23515	18813	20573	8431	6787	5305
400	ENSG00000161642	218.774	-1.61564	0.209923	-7.69633	1.40028e-14	6.21444e-13	ZNF385A	25946	1.08024e-12	344	355	291	118	113	91
1294	ENSG00000228300	216.511	-1.61563	0.280859	-5.75246	8.7953e-09	1.2066e-07	C19orf24	55009	2.09741e-07	362	297	321	160	80	79
277	ENSG00000150779	522.552	-1.6155	0.19756	-8.17726	2.90371e-16	1.86089e-14	TIMM8B	26521	3.23475e-14	677	737	950	285	262	225
9386	ENSG00000229107	6.08859	-1.61549	0.951877	-1.69716	0.0896661	0.172754	ABHD17AP4	NA	0.294792	8	9	10	7	1	1
1737	ENSG00000168273	83.3903	-1.61491	0.30802	-5.24288	1.58089e-07	1.61565e-06	SMIM4	440957	2.80846e-06	103	111	163	51	32	41
614	ENSG00000105701	866.727	-1.61395	0.231046	-6.98543	2.83991e-12	8.21076e-11	FKBP8	23770	1.42726e-10	1475	1281	1165	591	336	354
495	ENSG00000162076	266.288	-1.61323	0.220204	-7.32609	2.36968e-13	8.49828e-12	FLYWCH2	114984	1.47724e-11	356	431	418	164	125	104
7879	ENSG00000272172	7.39164	-1.61285	0.77188	-2.08951	0.0366622	0.0830348	RP13-582O9.7	NA	0.143587	8	12	14	4	3	4
12043	ENSG00000248528	2.29703	-1.61201	1.33963	-1.20333	0.228851	0.358376	CTC-458G6.2	NA	0.586388	3	4	3	1	1	2
11471	ENSG00000263366	2.80656	-1.61083	1.24835	-1.29037	0.196921	0.319333	ABHD17AP5	NA	0.529735	5	6	2	2	1	1
11717	ENSG00000213130	2.78678	-1.61065	1.28543	-1.25301	0.210204	0.336326	EEF1DP5	NA	0.553552	6	4	3	2	2	0
1490	ENSG00000069011	294.371	-1.61045	0.293207	-5.49253	3.96219e-08	4.72059e-07	PITX1	5307	8.20573e-07	469	477	386	229	102	104
223	ENSG00000130193	432.154	-1.60908	0.191816	-8.38868	4.91613e-17	3.9135e-15	THEM6	51337	6.80278e-15	661	660	632	261	187	192
3453	ENSG00000166825	168.162	-1.60817	0.410617	-3.91648	8.98525e-05	0.000461935	ANPEP	290	0.000802973	85	386	289	72	66	111
480	ENSG00000177697	2962.86	-1.60767	0.217663	-7.38607	1.51227e-13	5.59289e-12	CD151	977	9.72203e-12	4681	4441	4264	2004	1279	1109
1404	ENSG00000172366	383.531	-1.60628	0.28666	-5.60342	2.1016e-08	2.65724e-07	MCRIP2	100287175	4.61903e-07	555	531	647	298	136	134
1151	ENSG00000128185	184.428	-1.60579	0.269761	-5.95262	2.6389e-09	4.06679e-08	DGCR6L	85359	7.06923e-08	309	273	252	131	74	68
12538	ENSG00000278763	2.30227	-1.60517	1.42532	-1.12618	0.260091	0.394425	FAM27B	NA	0.640125	2	4	5	0	3	1
3868	ENSG00000230615	30.6787	-1.60507	0.436536	-3.67682	0.000236157	0.00108383	RP5-1198O20.4	NA	0.001884	27	53	58	14	15	16
383	ENSG00000104524	241.305	-1.6046	0.206485	-7.77103	7.78525e-15	3.60845e-13	PYCRL	65263	6.27252e-13	362	346	382	143	113	102
6471	ENSG00000260136	11.9667	-1.60384	0.635384	-2.5242	0.011596	0.0318412	CTD-2270L9.4	NA	0.0552976	16	13	25	5	5	8
1487	ENSG00000105464	258.614	-1.60384	0.29194	-5.49372	3.93551e-08	4.69569e-07	GRIN2D	2906	8.16243e-07	487	380	301	172	136	75
477	ENSG00000189171	242.635	-1.60333	0.216725	-7.39801	1.38244e-13	5.1449e-12	S100A13	6284	8.94329e-12	304	391	400	114	105	142
508	ENSG00000277972	368.892	-1.60304	0.220122	-7.28253	3.27617e-13	1.14486e-11	CISD3	284106	1.99008e-11	539	570	557	243	150	155
158	ENSG00000182195	635.208	-1.60254	0.182723	-8.77035	1.78117e-18	2.00122e-16	LDOC1	23641	3.47869e-16	1087	947	834	350	318	276
5678	ENSG00000170231	17.0453	-1.60254	0.568831	-2.81725	0.0048437	0.0151436	FABP6	2172	0.0263239	40	20	17	6	11	8
556	ENSG00000116649	916.1	-1.6023	0.224349	-7.14199	9.19879e-13	2.937e-11	SRM	6723	5.10533e-11	1634	1323	1178	595	417	349
12619	ENSG00000198535	2.31543	-1.60202	1.43583	-1.11575	0.264529	0.399177	C2CD4A	145741	0.646869	1	5	5	0	2	2
3207	ENSG00000221821	39.453	-1.602	0.394609	-4.05971	4.91327e-05	0.000271969	C6orf226	441150	0.000472759	65	50	64	25	11	22
198	ENSG00000030582	1421.95	-1.602	0.188577	-8.49518	1.9763e-17	1.77188e-15	GRN	2896	3.08003e-15	2357	2024	2036	854	697	563
6871	ENSG00000242574	428.048	-1.60197	0.67149	-2.38569	0.0170469	0.0440939	HLA-DMB	3109	0.0765585	324	746	861	124	127	386
7677	ENSG00000145192	7.88675	-1.60146	0.745115	-2.14927	0.0316128	0.0734255	AHSG	197	0.127069	12	9	14	5	3	4
1180	ENSG00000142185	75.7703	-1.601	0.270308	-5.92288	3.1636e-09	4.75934e-08	TRPM2	7226	8.27308e-08	115	112	115	39	37	37
4782	ENSG00000224011	19.1802	-1.60044	0.497208	-3.21885	0.00128707	0.00477794	AC111155.1	NA	0.00830541	26	35	25	11	9	9
10031	ENSG00000164266	4.61238	-1.60042	1.03192	-1.55092	0.120922	0.219646	SPINK1	6690	0.371987	3	7	10	1	2	4
582	ENSG00000124762	6891.13	-1.59971	0.225592	-7.09117	1.32982e-12	4.05618e-11	CDKN1A	1026	7.05078e-11	11957	7575	11557	3122	4362	2773
8002	ENSG00000234476	7.38593	-1.59971	0.781142	-2.04791	0.0405692	0.0905095	RP11-496N12.6	NA	0.156446	14	8	11	2	5	4
4919	ENSG00000188763	22.3519	-1.5997	0.507754	-3.15054	0.00162968	0.0058813	FZD9	8326	0.0102234	47	25	30	17	9	8
5874	ENSG00000137825	14.5838	-1.5991	0.584034	-2.73803	0.00618091	0.0186795	ITPKA	3706	0.0324703	16	28	22	10	8	4
2108	ENSG00000214207	57.2755	-1.59888	0.327673	-4.87949	1.0636e-06	8.954e-06	KRT18P10	NA	1.55646e-05	96	71	91	37	24	25
1503	ENSG00000167281	136.272	-1.59866	0.291898	-5.47678	4.33136e-08	5.11578e-07	RBFOX3	146713	8.89268e-07	246	182	187	94	64	44
6354	ENSG00000213763	13.4603	-1.59839	0.622441	-2.56794	0.0102306	0.028605	ACTBP2	NA	0.0496844	26	13	22	10	3	7
11493	ENSG00000280033	2.82941	-1.59782	1.24057	-1.28797	0.197755	0.320393	CTD-2095E4.3	NA	0.53096	3	7	2	2	1	2
317	ENSG00000173511	476.719	-1.59662	0.200157	-7.97686	1.50104e-15	8.40583e-14	VEGFB	7423	1.46117e-13	658	811	681	289	199	222
3651	ENSG00000285533	28.622	-1.596	0.418592	-3.81279	0.000137409	0.000668116	NA	NA	0.00116137	40	48	41	17	14	11
11934	ENSG00000224292	2.78881	-1.59573	1.30835	-1.21965	0.222599	0.351314	AF196972.9	101927635	0.57558	7	2	3	2	3	0
7382	ENSG00000118804	8.42987	-1.59406	0.716803	-2.22384	0.0261589	0.0631284	STBD1	8987	0.109349	11	13	14	5	4	4
11323	ENSG00000231533	2.80301	-1.59335	1.21412	-1.31235	0.189402	0.310058	RP1-232L24.3	NA	0.516168	5	4	5	2	2	1
5951	ENSG00000175600	23.0923	-1.59313	0.588605	-2.70661	0.00679731	0.0202795	SUGCT	79783	0.0352456	59	17	29	9	20	6
4273	ENSG00000237214	34.0523	-1.59292	0.458867	-3.47142	0.000517704	0.00215078	RP11-12M9.3	NA	0.00373867	49	28	76	23	14	13
12473	ENSG00000228701	2.29905	-1.59283	1.40329	-1.13507	0.256347	0.389912	TNKS2-AS1	100507633	0.634197	5	2	3	0	2	2
9002	ENSG00000242951	5.65188	-1.59268	0.892969	-1.78358	0.0744918	0.148896	RP11-507E23.1	NA	0.255317	5	12	9	2	3	3
5805	ENSG00000137726	19.2507	-1.59248	0.575471	-2.76725	0.00565307	0.0172869	FXYD6	53826	0.0300494	14	37	37	10	5	14
13321	ENSG00000233411	2.30358	-1.5918	1.56578	-1.01662	0.309333	0.449516	RP11-104L21.2	NA	0.716417	7	4	0	0	2	2
144	ENSG00000159199	2017.19	-1.59127	0.17867	-8.90623	5.27991e-19	6.50895e-17	ATP5G1	516	1.13144e-16	2764	2948	3377	1210	894	911
3316	ENSG00000130751	31.9034	-1.59112	0.398512	-3.99265	6.53393e-05	0.00034979	NPAS1	4861	0.000608033	49	45	50	19	17	12
1030	ENSG00000100075	1259.53	-1.59012	0.258695	-6.1467	7.91105e-10	1.36347e-08	SLC25A1	6576	2.37009e-08	2498	1713	1462	852	580	451
167	ENSG00000197756	6335.47	-1.58925	0.182171	-8.72396	2.68649e-18	2.85573e-16	RPL37A	6168	4.96406e-16	10172	8665	9695	3842	3081	2559
3688	ENSG00000275880	32.8671	-1.58821	0.419013	-3.79036	0.00015043	0.000723924	RP11-90L1.8	NA	0.00125838	45	63	40	13	14	23
2952	ENSG00000131187	79.9803	-1.58812	0.375823	-4.22573	2.38172e-05	0.000143226	F12	2161	0.000248967	124	123	114	66	35	19
435	ENSG00000213741	2626.77	-1.58793	0.210526	-7.54266	4.6048e-14	1.87918e-12	RPS29	6235	3.26655e-12	3891	3244	4692	1629	1279	1026
7470	ENSG00000231908	10.5011	-1.58756	0.721596	-2.20007	0.0278021	0.0663008	IDH1-AS1	100507475	0.114848	9	20	18	9	5	2
882	ENSG00000213465	234.112	-1.58714	0.246871	-6.42903	1.28422e-10	2.58475e-09	ARL2	402	4.49302e-09	385	309	360	160	100	91
450	ENSG00000185339	274.689	-1.58692	0.211627	-7.49869	6.44581e-14	2.5428e-12	TCN2	6948	4.4201e-12	499	354	383	142	147	122
5029	ENSG00000178172	21.8564	-1.58668	0.511502	-3.102	0.00192217	0.0067851	SPINK6	404203	0.0117944	18	47	33	13	9	11
4662	ENSG00000235034	29.4494	-1.58656	0.483789	-3.27946	0.00104007	0.00396038	C19orf81	342918	0.00688426	25	50	58	22	9	12
95	ENSG00000112514	772.424	-1.5859	0.171272	-9.25955	2.05294e-20	3.82082e-18	CUTA	51596	6.64167e-18	1195	1108	1174	452	343	363
4162	ENSG00000074276	77.8108	-1.58469	0.450025	-3.52134	0.000429367	0.00183136	CDHR2	54825	0.00318342	47	171	132	29	26	62
2078	ENSG00000142459	77.8201	-1.58324	0.321736	-4.92094	8.61291e-07	7.35786e-06	EVI5L	115704	1.279e-05	153	96	102	51	37	29
108	ENSG00000144713	8065.39	-1.58313	0.172882	-9.15727	5.32283e-20	8.74916e-18	RPL32	6161	1.52085e-17	12970	11107	12206	4640	4194	3276
13216	ENSG00000159224	2.32537	-1.58273	1.53334	-1.03221	0.301972	0.441254	GIP	2695	0.704997	2	5	3	0	0	4
385	ENSG00000158856	565.964	-1.58203	0.203768	-7.76391	8.23519e-15	3.79717e-13	DMTN	2039	6.60056e-13	783	990	772	286	227	338
37	ENSG00000131143	4185.23	-1.58198	0.154222	-10.2578	1.09219e-24	5.24015e-22	COX4I1	1327	9.10886e-22	5846	5967	7011	2304	1995	1988
417	ENSG00000128626	1428.5	-1.58178	0.207264	-7.63171	2.31651e-14	9.86156e-13	MRPS12	6183	1.71422e-12	2343	1895	2188	933	635	577
479	ENSG00000196502	285.703	-1.5813	0.213923	-7.39193	1.44718e-13	5.36332e-12	SULT1A1	6817	9.32296e-12	390	406	488	132	122	176
381	ENSG00000214160	606.05	-1.58113	0.203407	-7.77326	7.64929e-15	3.56405e-13	ALG3	10195	6.19532e-13	940	987	799	379	247	284
1048	ENSG00000170412	169.268	-1.58095	0.257971	-6.12839	8.87741e-10	1.50374e-08	GPRC5C	55890	2.61392e-08	218	295	249	113	76	65
616	ENSG00000167797	704.749	-1.58033	0.226554	-6.97553	3.04727e-12	8.78104e-11	CDK2AP2	10263	1.52639e-10	868	1204	1097	467	281	311
1088	ENSG00000163993	2914.62	-1.5799	0.26025	-6.07069	1.27362e-09	2.07807e-08	S100P	6286	3.61227e-08	2900	4351	5853	1301	1163	1920
1608	ENSG00000269293	72.4109	-1.57968	0.293552	-5.38128	7.39586e-08	8.16488e-07	ZSCAN16-AS1	100129195	1.41929e-06	96	102	128	43	35	31
33	ENSG00000126247	7386.71	-1.57882	0.151234	-10.4396	1.63551e-25	8.79803e-23	CAPNS1	826	1.52935e-22	11916	11297	9992	4088	3533	3494
1957	ENSG00000160446	193.067	-1.57873	0.314747	-5.01586	5.27956e-07	4.7891e-06	ZDHHC12	84885	8.32481e-06	273	323	271	157	64	69
113	ENSG00000106541	23770.3	-1.57824	0.173021	-9.12166	7.39816e-20	1.16223e-17	AGR2	10551	2.02029e-17	36328	39262	31252	10198	13956	11626
6742	ENSG00000260018	12.2667	-1.57817	0.649279	-2.43065	0.0150718	0.0397319	RP11-505K9.1	NA	0.0689833	16	14	25	8	3	8
24	ENSG00000172809	3822.22	-1.5779	0.148623	-10.6168	2.49006e-26	1.84182e-23	RPL38	6169	3.2016e-23	5713	5442	6024	2118	1901	1735
3388	ENSG00000121900	75.7319	-1.57786	0.399918	-3.94545	7.96489e-05	0.000417334	TMEM54	113452	0.000725445	100	142	99	67	20	27
10835	ENSG00000015285	3.33428	-1.57715	1.12582	-1.40089	0.161247	0.273961	WAS	7454	0.459213	5	6	5	2	1	2
4077	ENSG00000197165	24.622	-1.57675	0.441847	-3.56855	0.000358961	0.00156298	SULT1A2	6799	0.0027169	36	39	35	13	9	15
11285	ENSG00000232456	3.33114	-1.57655	1.19386	-1.32055	0.18665	0.306514	RP11-5P18.10	NA	0.510382	8	6	1	2	1	2
285	ENSG00000141696	511.972	-1.57617	0.193655	-8.13906	3.98344e-16	2.4812e-14	P3H4	10609	4.31302e-14	669	784	848	306	223	242
4857	ENSG00000214535	26.2885	-1.57586	0.495147	-3.18261	0.00145955	0.00533454	RPS15AP1	NA	0.00927294	35	22	60	13	9	17
801	ENSG00000159069	626.514	-1.57563	0.24011	-6.56213	5.30454e-11	1.17561e-09	FBXW5	54461	2.04354e-09	1032	915	868	441	279	224
321	ENSG00000124107	1184.85	-1.57527	0.197858	-7.96165	1.69755e-15	9.38783e-14	SLPI	6590	1.63187e-13	1510	1633	2180	506	599	682
27	ENSG00000114378	1988.34	-1.5752	0.14876	-10.5888	3.35724e-26	2.172e-23	HYAL1	3373	3.77555e-23	3250	2717	2965	1048	966	984
7507	ENSG00000127774	13.0284	-1.57408	0.71842	-2.19103	0.0284497	0.0675097	EMC6	83460	0.116944	24	19	16	13	5	1
4872	ENSG00000182612	25.7942	-1.57371	0.495849	-3.17378	0.0015047	0.00548265	TSPAN10	83882	0.0095304	44	32	40	21	13	5
13260	ENSG00000226733	2.31109	-1.57347	1.53433	-1.02551	0.305123	0.444927	RP11-397G17.1	NA	0.710034	3	2	5	0	0	4
8103	ENSG00000133661	14.9774	-1.57318	0.779501	-2.0182	0.0435709	0.0960476	SFTPD	6441	0.165928	43	6	18	6	14	2
1692	ENSG00000106330	75.8851	-1.57305	0.296961	-5.29714	1.17629e-07	1.23413e-06	MOSPD3	64598	2.14527e-06	124	120	97	49	33	32
7466	ENSG00000172738	11.2691	-1.57258	0.714449	-2.20111	0.0277285	0.0661608	TMEM217	221468	0.114606	18	13	19	2	11	4
10909	ENSG00000196260	3.32	-1.5714	1.13198	-1.38819	0.16508	0.278914	SFTA2	389376	0.466922	6	4	6	2	1	2
324	ENSG00000099797	804.258	-1.57047	0.197399	-7.95582	1.77947e-15	9.74976e-14	TECR	693224	1.69478e-13	1276	1329	1005	491	345	380
126	ENSG00000125505	1737.03	-1.56952	0.173428	-9.04996	1.43023e-19	2.01504e-17	MBOAT7	79143	3.50271e-17	2754	2566	2475	1053	812	761
532	ENSG00000214253	458.387	-1.56866	0.218111	-7.19205	6.38242e-13	2.12971e-11	FIS1	51024	3.70204e-11	745	615	697	304	192	197
1666	ENSG00000169220	89.1317	-1.5683	0.29501	-5.31609	1.06018e-07	1.12967e-06	RGS14	10636	1.96369e-06	116	111	173	52	47	36
8538	ENSG00000183607	14.2309	-1.56808	0.824112	-1.90275	0.0570726	0.119829	GKN2	200504	0.206272	47	8	9	10	11	1
2485	ENSG00000174276	60.4739	-1.56757	0.343947	-4.5576	5.17417e-06	3.69625e-05	ZNHIT2	741	6.42513e-05	86	85	100	45	23	23
7555	ENSG00000015520	9.00001	-1.56579	0.718013	-2.18073	0.0292034	0.0688563	NPC1L1	29881	0.11928	15	13	13	2	4	7
782	ENSG00000197858	1316.98	-1.5657	0.237057	-6.60476	3.98167e-11	9.03869e-10	GPAA1	8733	1.57118e-09	2343	1853	1711	920	576	499
402	ENSG00000149806	1916.02	-1.56564	0.203557	-7.69139	1.45546e-14	6.4272e-13	FAU	2197	1.11723e-12	2833	2650	3111	1265	860	778
11084	ENSG00000240366	3.31652	-1.56413	1.15245	-1.35722	0.174713	0.29122	RPL36AP45	NA	0.486402	7	2	6	2	3	1
3471	ENSG00000205309	50.233	-1.56394	0.400277	-3.90715	9.33904e-05	0.000477634	NT5M	56953	0.000830263	48	94	83	34	14	27
546	ENSG00000205426	11173.7	-1.56354	0.218617	-7.15197	8.55417e-13	2.7812e-11	KRT81	3887	4.83451e-11	14900	17000	18195	7509	4050	5389
11990	ENSG00000054938	3.3832	-1.56276	1.28917	-1.21223	0.225426	0.354452	CHRDL2	25884	0.580166	0	9	6	1	2	3
1131	ENSG00000176978	234.875	-1.56033	0.260839	-5.98198	2.20437e-09	3.45994e-08	DPP7	29952	6.01436e-08	380	333	340	171	91	94
897	ENSG00000112667	263.069	-1.55987	0.243845	-6.39698	1.58483e-10	3.13644e-09	DNPH1	10591	5.45201e-09	373	420	386	181	95	123
4222	ENSG00000131188	76.1346	-1.55934	0.446311	-3.49385	0.000476106	0.00200186	PRR7	80758	0.00347979	151	103	88	73	26	17
11591	ENSG00000187037	3.88684	-1.55864	1.22406	-1.27334	0.202898	0.327054	GPR141	353345	0.540163	2	9	6	1	5	0
11600	ENSG00000228878	3.35706	-1.55835	1.22498	-1.27214	0.203322	0.3275	SEPT7-AS1	NA	0.540872	2	6	7	2	0	4
1308	ENSG00000001617	280.22	-1.55796	0.271929	-5.72931	1.00843e-08	1.36862e-07	SEMA3F	6405	2.37905e-07	253	495	508	163	122	142
2288	ENSG00000174886	92.3487	-1.5564	0.330535	-4.70872	2.49276e-06	1.93407e-05	NDUFA11	126328	3.36196e-05	118	112	184	67	38	35
7067	ENSG00000197421	10.5379	-1.55633	0.67001	-2.32285	0.0201872	0.05081	GGT3P	NA	0.0881471	17	14	16	6	3	8
10390	ENSG00000115363	5.90815	-1.55592	1.04984	-1.48206	0.138325	0.243098	EVA1A	84141	0.41082	3	9	14	7	0	2
422	ENSG00000107223	1585.15	-1.55516	0.204553	-7.60271	2.89987e-14	1.21987e-12	EDF1	8721	2.12048e-12	2076	2582	2439	1031	633	750
296	ENSG00000103089	936.715	-1.55508	0.193025	-8.05636	7.85987e-16	4.7138e-14	FA2H	79152	8.19392e-14	1603	1425	1166	540	494	393
110	ENSG00000125648	1016.99	-1.55508	0.170036	-9.14559	5.93045e-20	9.57067e-18	SLC25A23	79085	1.66365e-17	1611	1660	1282	539	533	477
10379	ENSG00000185296	3.84988	-1.55492	1.04786	-1.48391	0.137833	0.242499	CTD-2139B15.1	NA	0.409795	5	5	8	2	2	2
10083	ENSG00000102575	4.88171	-1.55442	1.00933	-1.54005	0.123547	0.223296	ACP5	54	0.378104	7	8	7	4	3	0
6729	ENSG00000166589	32.1207	-1.55415	0.637909	-2.43632	0.0148374	0.0391897	CDH16	1014	0.0680417	12	67	64	10	7	33
3547	ENSG00000197483	47.7872	-1.55405	0.401804	-3.86768	0.000109877	0.000549914	ZNF628	89887	0.000955906	73	72	70	40	18	14
4507	ENSG00000170271	66.0781	-1.55379	0.463197	-3.3545	0.000795097	0.0031317	FAXDC2	10826	0.00544377	162	66	67	19	59	23
10972	ENSG00000237749	3.82487	-1.55259	1.12682	-1.37785	0.168251	0.282893	RP3-423B22.5	NA	0.473193	11	2	3	2	3	1
39	ENSG00000215030	1387.3	-1.55257	0.152118	-10.2064	1.85717e-24	8.45343e-22	RPL13P12	NA	1.46945e-21	2226	1850	2132	716	719	681
9742	ENSG00000261614	4.89383	-1.55143	0.961058	-1.61429	0.106464	0.198464	CSDAP1	NA	0.337197	7	9	6	4	3	1
2730	ENSG00000233522	45.4846	-1.55081	0.354561	-4.3739	1.22044e-05	7.93601e-05	FAM224A	NA	0.00013795	61	60	82	29	20	20
219	ENSG00000142541	22970.1	-1.55042	0.184218	-8.41621	3.88855e-17	3.15204e-15	RPL13A	23521	5.47913e-15	38476	29738	34529	13908	11635	9534
10027	ENSG00000018280	4.90351	-1.55014	0.99876	-1.55207	0.120646	0.219235	SLC11A1	6556	0.371287	2	9	10	4	2	2
6115	ENSG00000255737	20.9897	-1.54965	0.584209	-2.65256	0.00798833	0.0231941	AGAP2-AS1	100130776	0.0403113	42	22	30	21	7	4
916	ENSG00000118640	451.773	-1.54958	0.243122	-6.37366	1.84572e-10	3.57699e-09	VAMP8	8673	6.21783e-09	811	548	662	222	302	166
11152	ENSG00000113905	3.36465	-1.54909	1.15301	-1.34352	0.179103	0.297199	HRG	3273	0.495585	5	6	5	1	1	4
22	ENSG00000166794	2045.61	-1.54909	0.145584	-10.6405	1.93114e-26	1.55825e-23	PPIB	5479	2.70868e-23	2813	3186	3148	1106	1025	995
3436	ENSG00000025423	34.8296	-1.5477	0.394485	-3.92335	8.73278e-05	0.000451177	HSD17B6	8630	0.000784273	41	55	59	13	22	18
1770	ENSG00000119632	64.585	-1.54685	0.297298	-5.20305	1.96047e-07	1.96623e-06	IFI27L2	83982	3.41787e-06	99	92	98	40	32	27
87	ENSG00000163956	1351.02	-1.54592	0.163975	-9.42773	4.19047e-21	8.55049e-19	LRPAP1	4043	1.48632e-18	2061	1883	2094	796	617	655
2069	ENSG00000187994	99.1226	-1.54384	0.31339	-4.92627	8.38148e-07	7.1913e-06	RINL	126432	1.25005e-05	170	99	173	40	67	44
4231	ENSG00000261461	29.8359	-1.5434	0.442327	-3.48927	0.000484335	0.00203212	UBE2MP1	NA	0.0035324	50	42	41	24	10	12
1062	ENSG00000177666	477.81	-1.54338	0.252528	-6.11171	9.85693e-10	1.64765e-08	PNPLA2	57104	2.86408e-08	833	667	635	339	227	165
7646	ENSG00000182580	9.79431	-1.54324	0.715284	-2.15751	0.0309657	0.0721685	EPHB3	2049	0.124957	16	17	11	8	2	5
4789	ENSG00000240652	28.4414	-1.54254	0.479423	-3.21748	0.0012932	0.00479368	RP11-832N8.1	NA	0.00833278	61	22	43	17	10	16
2284	ENSG00000107872	75.3853	-1.54196	0.327096	-4.7141	2.42784e-06	1.887e-05	FBXL15	79176	3.28013e-05	125	103	110	54	38	23
280	ENSG00000183978	650.892	-1.54167	0.188788	-8.16613	3.18451e-16	2.01898e-14	COA3	28958	3.50956e-14	776	983	1148	331	334	334
10141	ENSG00000129214	4.40617	-1.54091	1.00859	-1.52779	0.126564	0.227452	SHBG	6462	0.385122	7	9	3	2	3	2
441	ENSG00000084207	7373.37	-1.54085	0.204687	-7.52785	5.15827e-14	2.07641e-12	GSTP1	2950	3.60938e-12	13064	9774	10086	4779	3494	3042
1998	ENSG00000130513	990.702	-1.54066	0.309581	-4.9766	6.47113e-07	5.74953e-06	GDF15	9518	9.9943e-06	1814	1018	1592	708	550	262
566	ENSG00000102934	170.429	-1.54042	0.216153	-7.1265	1.0295e-12	3.22892e-11	PLLP	51090	5.61277e-11	243	241	277	76	97	88
212	ENSG00000177600	4639.03	-1.53953	0.182102	-8.45421	2.80973e-17	2.35275e-15	RPLP2	6181	4.08974e-15	7944	6436	6331	2812	2333	1978
202	ENSG00000164081	544.336	-1.53903	0.181412	-8.48359	2.1835e-17	1.91888e-15	TEX264	51368	3.33556e-15	760	815	856	324	236	276
5279	ENSG00000242114	22.6365	-1.53882	0.515027	-2.98784	0.00280953	0.00944776	MTFP1	51537	0.0164229	41	32	29	20	8	7
2051	ENSG00000070526	664.714	-1.53802	0.311182	-4.94251	7.71244e-07	6.67534e-06	ST6GALNAC1	55808	1.16036e-05	1311	920	736	326	508	188
1693	ENSG00000101986	92.9592	-1.53782	0.290341	-5.29661	1.17974e-07	1.23702e-06	ABCD1	215	2.15029e-06	166	125	124	63	37	42
394	ENSG00000143416	675.73	-1.5377	0.19899	-7.7275	1.09681e-14	4.94176e-13	SELENBP1	8991	8.59018e-13	816	1133	1067	329	301	409
9808	ENSG00000259485	4.91103	-1.53734	0.959714	-1.60187	0.109183	0.202561	CTD-2147F2.1	NA	0.343495	3	8	10	3	2	3
1173	ENSG00000130005	267.111	-1.53728	0.259197	-5.93094	3.01212e-09	4.5585e-08	GAMT	2593	7.92396e-08	493	325	374	166	152	92
2926	ENSG00000161677	117.953	-1.53309	0.361466	-4.2413	2.22231e-05	0.000134827	JOSD2	126119	0.000234367	185	181	161	105	33	43
3464	ENSG00000250321	62.7161	-1.53283	0.392016	-3.91013	9.22468e-05	0.000472738	RP11-478C6.4	NA	0.000821752	100	50	130	26	26	44
5721	ENSG00000213315	20.4025	-1.53195	0.546748	-2.80193	0.00507975	0.0157622	CTD-3035D6.1	NA	0.0273992	34	27	30	9	4	19
648	ENSG00000083845	7327.15	-1.53194	0.22154	-6.91497	4.67954e-12	1.28196e-10	RPS5	6193	2.22841e-10	13146	8895	10626	4840	3625	2831
2070	ENSG00000268412	94.1166	-1.53157	0.310923	-4.92589	8.39751e-07	7.20158e-06	TRMT112P6	NA	1.25184e-05	99	149	172	59	34	52
2279	ENSG00000217325	96.3361	-1.53119	0.324594	-4.71724	2.39071e-06	1.86222e-05	PRELID1P1	NA	3.23706e-05	150	153	127	73	47	28
132	ENSG00000147123	985.078	-1.53077	0.169684	-9.02133	1.85821e-19	2.49131e-17	NDUFB11	54539	4.33061e-17	1456	1443	1493	598	446	476
8990	ENSG00000171450	6.46639	-1.53019	0.856173	-1.78724	0.0738984	0.14793	CDK5R2	8941	0.253655	6	12	11	6	2	3
1273	ENSG00000100299	247.269	-1.52943	0.264509	-5.78217	7.37412e-09	1.02832e-07	ARSA	410	1.78751e-07	457	287	358	165	127	89
856	ENSG00000090581	230.402	-1.52901	0.236055	-6.47734	9.33545e-11	1.93602e-09	GNPTG	84572	3.36534e-09	310	295	422	145	100	111
2191	ENSG00000204264	101.781	-1.52898	0.318441	-4.80147	1.57509e-06	1.27617e-05	PSMB8	5696	2.21835e-05	91	168	195	48	46	63
2531	ENSG00000275183	51.3728	-1.52804	0.337905	-4.52212	6.12242e-06	4.29416e-05	LENG9	94059	7.46447e-05	85	76	68	35	23	21
935	ENSG00000162910	272.788	-1.52697	0.241622	-6.31967	2.62119e-10	4.97661e-09	MRPL55	128308	8.65076e-09	372	386	457	191	118	111
875	ENSG00000233461	121.906	-1.52593	0.236698	-6.44674	1.14285e-10	2.31861e-09	RP11-295G20.2	NA	4.03039e-09	162	195	186	66	55	67
115	ENSG00000117691	619.979	-1.52528	0.167379	-9.11273	8.03351e-20	1.24009e-17	NENF	29937	2.15564e-17	889	871	1000	355	304	300
941	ENSG00000007080	407.799	-1.52496	0.241605	-6.3118	2.75801e-10	5.20145e-09	CCDC124	115098	9.04159e-09	669	627	520	291	175	164
1438	ENSG00000161513	1289.83	-1.5247	0.27444	-5.55567	2.76553e-08	3.41402e-07	FDXR	2232	5.93454e-07	2551	1323	1869	811	760	425
673	ENSG00000186198	307.527	-1.52448	0.222823	-6.84164	7.82923e-12	2.06515e-10	SLC51B	123264	3.58981e-10	377	452	541	190	129	156
709	ENSG00000214026	485.411	-1.52353	0.225125	-6.76746	1.31067e-11	3.28167e-10	MRPL23	107987373	5.70447e-10	751	757	654	337	193	222
117	ENSG00000218426	1831.13	-1.52281	0.167231	-9.106	8.54718e-20	1.29683e-17	RP11-475C16.1	NA	2.25426e-17	2775	2462	2913	1073	951	812
161	ENSG00000110651	2058.32	-1.52258	0.173952	-8.75285	2.08028e-18	2.29373e-16	CD81	975	3.98716e-16	3327	3035	2799	1265	998	926
5325	ENSG00000170458	18.3571	-1.52238	0.513576	-2.96428	0.00303393	0.0101143	CD14	929	0.0175814	23	27	32	13	7	9
11025	ENSG00000213654	3.87809	-1.52216	1.11282	-1.36785	0.17136	0.286818	GPSM3	63940	0.479623	6	4	8	1	1	4
50	ENSG00000166441	8922.31	-1.5215	0.153767	-9.89483	4.38349e-23	1.55631e-20	RPL27A	6157	2.70532e-20	13047	12274	14383	4995	4781	4054
6656	ENSG00000120054	16.0785	-1.52037	0.618197	-2.45936	0.0139185	0.0371605	CPN1	1369	0.0645276	11	30	31	12	9	4
9112	ENSG00000259002	5.96139	-1.51997	0.866207	-1.75474	0.0793044	0.156824	RP11-671J11.7	NA	0.268566	11	11	5	3	3	3
184	ENSG00000105223	1804	-1.51948	0.176893	-8.58984	8.7094e-18	8.37883e-16	PLD3	23646	1.45648e-15	2834	2507	2684	1105	930	764
66	ENSG00000134590	1047.96	-1.51895	0.157472	-9.64582	5.12015e-22	1.36717e-19	FAM127A	8933	2.37653e-19	1739	1481	1441	567	534	526
1613	ENSG00000169894	228.7	-1.51824	0.282235	-5.37936	7.4752e-08	8.22689e-07	MUC3A	4584	1.43007e-06	457	339	221	131	135	89
1280	ENSG00000126934	903.439	-1.51773	0.262813	-5.77495	7.69778e-09	1.06759e-07	MAP2K2	5605	1.85577e-07	1754	1179	1085	651	419	333
967	ENSG00000166165	616.941	-1.51747	0.24218	-6.26587	3.70743e-10	6.80602e-09	CKB	1152	1.18308e-08	1026	892	826	414	338	205
225	ENSG00000177674	552.247	-1.51736	0.180963	-8.38491	5.07629e-17	4.00508e-15	AGTRAP	57085	6.96196e-15	809	812	835	340	246	271
164	ENSG00000105193	14610.4	-1.51725	0.173853	-8.72722	2.6101e-18	2.82527e-16	RPS16	6217	4.91113e-16	21877	19650	23440	9134	6948	6614
675	ENSG00000160211	15458.7	-1.517	0.222001	-6.83329	8.2988e-12	2.18252e-10	G6PD	2539	3.79384e-10	28545	21789	18401	10159	7680	6177
12322	ENSG00000118094	3.35232	-1.51661	1.31187	-1.15607	0.247651	0.3805	TREH	11181	0.620192	6	1	8	0	1	4
652	ENSG00000099822	729.967	-1.5162	0.219434	-6.90961	4.85978e-12	1.32317e-10	HCN2	610	2.30005e-10	1151	1178	916	478	278	379
4500	ENSG00000240376	28.3897	-1.51614	0.451442	-3.35844	0.000783846	0.00309219	RP11-36C20.1	NA	0.0053751	50	34	42	22	9	12
71	ENSG00000163382	1639.41	-1.51573	0.158189	-9.58173	9.54368e-22	2.38619e-19	NAXE	128240	4.14787e-19	2433	2330	2524	964	751	833
1357	ENSG00000108479	236.781	-1.51556	0.267433	-5.66705	1.4528e-08	1.90052e-07	GALK1	2584	3.30365e-07	383	303	366	175	107	85
1491	ENSG00000095906	353.394	-1.51521	0.275936	-5.49116	3.99297e-08	4.75407e-07	NUBP2	10101	8.26392e-07	541	512	518	282	136	131
674	ENSG00000227500	480.1	-1.51511	0.221544	-6.83885	7.98288e-12	2.10255e-10	SCAMP4	113178	3.65483e-10	783	744	608	326	216	204
76	ENSG00000160221	645.923	-1.5146	0.159186	-9.51462	1.82374e-21	4.25988e-19	C21orf33	102724023	7.40487e-19	954	891	1026	351	320	334
2993	ENSG00000162300	50.4912	-1.51427	0.360954	-4.1952	2.72631e-05	0.000161702	ZFPL1	7542	0.000281084	77	76	72	37	15	27
6116	ENSG00000233205	16.5245	-1.51366	0.570695	-2.65231	0.00799422	0.0232074	AC108479.2	NA	0.0403345	22	20	32	13	8	4
5949	ENSG00000185924	15.0678	-1.51295	0.558869	-2.70717	0.00678601	0.0202531	RTN4RL1	146760	0.0351997	17	28	22	10	8	6
16382	ENSG00000207561	1.0383	-1.5129	2.24842	-0.67287	0.50103	NA	MIR635	693220	0.934765	0	2	2	2	0	0
16383	ENSG00000250526	1.0383	-1.5129	2.24842	-0.67287	0.50103	NA	CCT6P2	NA	0.934765	0	2	2	2	0	0
16384	ENSG00000283828	1.0383	-1.5129	2.24842	-0.67287	0.50103	NA	NA	NA	0.934765	0	2	2	2	0	0
436	ENSG00000159423	219.17	-1.5123	0.200514	-7.54212	4.62381e-14	1.88261e-12	ALDH4A1	8659	3.27251e-12	315	346	313	114	127	100
488	ENSG00000164885	237.069	-1.5119	0.205089	-7.3719	1.68218e-13	6.11926e-12	CDK5	1020	1.0637e-11	301	368	384	135	124	111
2166	ENSG00000184967	223.098	-1.51152	0.313177	-4.8264	1.39026e-06	1.13942e-05	NOC4L	79050	1.98063e-05	388	340	264	184	87	76
8756	ENSG00000223940	6.47351	-1.51062	0.818463	-1.84567	0.0649396	0.133149	KRT8P8	NA	0.228861	8	8	13	3	4	3
135	ENSG00000157399	761.145	-1.50967	0.16753	-9.01135	2.03541e-19	2.67649e-17	ARSE	415	4.6525e-17	1090	1225	1064	402	348	436
5939	ENSG00000260257	17.2078	-1.50881	0.556186	-2.71277	0.00667233	0.0199473	RP5-1085F17.3	NA	0.0346682	16	38	23	11	7	9
8676	ENSG00000240509	6.47796	-1.50795	0.808204	-1.8658	0.0620693	0.128376	RPL34P18	NA	0.220737	9	8	11	3	3	4
16030	ENSG00000249709	1.03725	-1.50678	2.0974	-0.718402	0.472509	NA	ZNF564	163050	0.909531	1	2	1	2	0	0
16031	ENSG00000266850	1.03725	-1.50678	2.0974	-0.718402	0.472509	NA	RP11-370A5.1	101927571	0.909531	1	2	1	2	0	0
6410	ENSG00000267475	14.5686	-1.50572	0.590449	-2.55012	0.0107686	0.0298507	CTD-2538C1.2	NA	0.0518404	12	25	27	6	10	6
13795	ENSG00000110076	2.09848	-1.50484	1.56248	-0.963113	0.335491	NA	NRXN2	9379	0.750432	1	7	1	2	1	0
5172	ENSG00000125726	25.9756	-1.5038	0.496467	-3.02901	0.00245354	0.00842032	CD70	970	0.0146369	20	35	59	11	13	17
8510	ENSG00000205639	6.99285	-1.50353	0.787367	-1.90957	0.0561886	0.118309	MFSD2B	388931	0.203745	12	8	10	4	3	4
2023	ENSG00000099974	318.242	-1.50338	0.30301	-4.96149	6.99543e-07	6.13855e-06	DDTL	100037417	1.06705e-05	557	425	430	264	127	106
92	ENSG00000177156	3049.69	-1.50311	0.161215	-9.32361	1.12449e-20	2.16977e-18	TALDO1	6888	3.77167e-18	4748	4300	4479	1850	1517	1404
1555	ENSG00000198246	217.627	-1.50275	0.276574	-5.43346	5.52705e-08	6.30972e-07	SLC29A3	55315	1.09681e-06	235	410	321	101	87	153
8120	ENSG00000232818	9.12079	-1.50267	0.746445	-2.0131	0.0441039	0.0970332	RPS2P32	NA	0.167591	8	18	15	6	2	6
900	ENSG00000197019	260.75	-1.50243	0.235045	-6.39211	1.63613e-10	3.22718e-09	SERTAD1	29950	5.60976e-09	377	334	446	172	133	103
7428	ENSG00000179292	164.038	-1.50174	0.678571	-2.21309	0.0268914	0.0644927	TMEM151A	256472	0.111714	433	129	165	121	95	42
3032	ENSG00000187624	60.0257	-1.5009	0.359968	-4.16954	3.05212e-05	0.000178662	C17orf97	400566	0.000310565	56	118	92	26	28	40
153	ENSG00000140990	1337.4	-1.50025	0.170388	-8.80488	1.30997e-18	1.5199e-16	NDUFB10	4716	2.64202e-16	1870	2021	2039	817	592	687
363	ENSG00000148450	256.181	-1.50019	0.191466	-7.83529	4.67754e-15	2.28748e-13	MSRB2	22921	3.9763e-13	347	375	413	126	131	144
4534	ENSG00000263004	23.0982	-1.49895	0.448632	-3.34116	0.000834287	0.00326649	RP11-166P13.3	NA	0.00567808	39	31	33	11	14	12
413	ENSG00000100284	427.21	-1.49886	0.195918	-7.65042	2.00318e-14	8.61026e-13	TOM1	10043	1.49671e-12	741	523	630	246	207	217
331	ENSG00000198171	997.034	-1.49866	0.188969	-7.93072	2.17875e-15	1.1685e-13	DDRGK1	65992	2.03118e-13	1492	1564	1363	650	459	454
1483	ENSG00000127415	100.462	-1.49861	0.272486	-5.49976	3.80304e-08	4.55236e-07	IDUA	3425	7.91329e-07	127	137	181	63	45	50
7066	ENSG00000260274	11.6824	-1.49824	0.64496	-2.323	0.0201791	0.0507968	RP11-817O13.8	NA	0.0881243	14	18	21	10	3	5
2916	ENSG00000255198	123.096	-1.49819	0.352625	-4.24868	2.15034e-05	0.000130908	SNHG9	NA	0.000227555	178	146	221	105	35	53
150	ENSG00000155366	1177.01	-1.49813	0.169187	-8.85487	8.37796e-19	9.91504e-17	RHOC	389	1.72351e-16	1865	1681	1670	693	635	518
5595	ENSG00000125122	18.2634	-1.49808	0.526219	-2.84687	0.00441518	0.0140067	LRRC29	26231	0.0243476	25	37	19	10	7	12
743	ENSG00000105204	195.632	-1.4976	0.224309	-6.6765	2.44716e-11	5.84684e-10	DYRK1B	9149	1.01635e-09	347	261	259	113	106	88
216	ENSG00000185043	1286.31	-1.49759	0.17759	-8.43284	3.37368e-17	2.77213e-15	CIB1	10519	4.81875e-15	1542	1962	2196	713	653	653
473	ENSG00000145494	694.197	-1.49653	0.201952	-7.41031	1.26004e-13	4.72903e-12	NDUFS6	4726	8.22039e-12	1046	1032	998	471	315	303
16085	ENSG00000132259	1.02959	-1.49637	2.1006	-0.712353	0.476246	NA	CNGA4	1262	0.913647	2	1	1	2	0	0
1927	ENSG00000284753	74.0607	-1.49584	0.296313	-5.04818	4.46046e-07	4.10909e-06	NA	NA	7.14276e-06	91	100	137	38	35	43
1083	ENSG00000126461	1133.16	-1.49582	0.246166	-6.07645	1.22869e-09	2.01401e-08	SCAF1	58506	3.50091e-08	1985	1563	1472	844	497	439
4117	ENSG00000232888	43.5547	-1.49557	0.421667	-3.5468	0.000389935	0.00168135	RPS11P5	NA	0.00292267	50	50	94	33	14	22
7543	ENSG00000129535	10.0941	-1.49479	0.68458	-2.18351	0.0289984	0.068482	NRL	4901	0.118631	18	11	16	6	7	3
44	ENSG00000101294	3024.7	-1.49458	0.148298	-10.0782	6.89747e-24	2.78226e-21	HM13	81502	4.83635e-21	4553	4723	4119	1686	1442	1625
1739	ENSG00000103152	143.343	-1.49347	0.285005	-5.24016	1.60436e-07	1.63776e-06	MPG	4350	2.84688e-06	216	195	225	110	55	60
1650	ENSG00000275234	95.5529	-1.49238	0.279783	-5.33406	9.60434e-08	1.03331e-06	CTD-2396E7.11	NA	1.79619e-06	112	179	131	45	49	56
1223	ENSG00000185187	166.326	-1.49157	0.254561	-5.8594	4.64555e-09	6.74043e-08	SIGIRR	59307	1.17168e-07	222	264	250	118	75	68
7821	ENSG00000232352	9.12929	-1.49107	0.708663	-2.10406	0.0353728	0.0806911	SEMA3B-AS1	101928931	0.139565	11	15	14	5	3	7
16730	ENSG00000011465	1.02297	-1.49091	2.25622	-0.660801	0.50874	NA	DCN	1634	0.937951	2	0	2	2	0	0
131	ENSG00000085871	649.988	-1.49082	0.165193	-9.02469	1.80213e-19	2.44209e-17	MGST2	4258	4.24504e-17	881	972	1023	309	365	350
4458	ENSG00000228305	27.7757	-1.4903	0.441015	-3.37924	0.000726859	0.00289439	AC016734.2	NA	0.00503127	43	32	48	13	20	11
4847	ENSG00000231789	24.9422	-1.48996	0.467567	-3.18662	0.00143946	0.00527092	PIK3CD-AS2	101929074	0.00916234	44	35	31	15	17	7
336	ENSG00000164713	500.069	-1.48932	0.188003	-7.9218	2.34093e-15	1.23679e-13	BRI3	25798	2.14989e-13	726	725	762	313	260	215
3481	ENSG00000100116	73.9533	-1.48925	0.381795	-3.90065	9.59344e-05	0.000489099	GCAT	23464	0.000850192	151	92	84	49	49	19
493	ENSG00000244313	754.608	-1.48848	0.202958	-7.33392	2.23512e-13	8.04824e-12	RP11-425L10.1	NA	1.39901e-11	1173	918	1247	434	445	311
16141	ENSG00000228323	1.05461	-1.48837	2.11442	-0.703913	0.481487	NA	AC008753.6	NA	0.920442	0	4	1	1	1	0
14802	ENSG00000113763	1.564	-1.48762	1.78686	-0.83253	0.40511	NA	UNC5A	90249	0.844437	3	4	0	2	1	0
77	ENSG00000142534	13449.1	-1.48708	0.156567	-9.49807	2.13817e-21	4.92945e-19	RPS11	6205	8.56878e-19	19565	18700	21213	8080	6895	6242
16147	ENSG00000143627	1.05356	-1.48692	2.11485	-0.703088	0.482001	NA	PKLR	5313	0.921136	1	4	0	1	1	0
9045	ENSG00000135226	13.1213	-1.48674	0.838918	-1.77222	0.0763587	0.151998	UGT2B28	54490	0.260506	2	27	29	2	7	12
6196	ENSG00000198417	17.4829	-1.48628	0.566406	-2.62406	0.00868891	0.0248984	MT1F	4494	0.0432735	14	31	33	13	6	9
1745	ENSG00000175793	1112.89	-1.4858	0.283888	-5.23377	1.66086e-07	1.6896e-06	SFN	2810	2.93701e-06	2236	1275	1410	833	543	380
14361	ENSG00000261924	1.56505	-1.48566	1.66724	-0.891088	0.372882	NA	CTD-2561B21.5	NA	0.801225	2	4	1	2	1	0
11995	ENSG00000254132	3.12452	-1.4848	1.22555	-1.21153	0.225691	0.354743	MTND6P3	NA	0.580606	3	6	5	3	2	0
542	ENSG00000090013	1633.69	-1.48462	0.207061	-7.16998	7.5006e-13	2.45665e-11	BLVRB	645	4.27036e-11	2514	2111	2597	1110	801	669
5240	ENSG00000141933	22.5924	-1.48408	0.494452	-3.00146	0.00268684	0.00910245	TPGS1	91978	0.0158226	39	30	32	19	9	8
278	ENSG00000232573	561.574	-1.48326	0.181569	-8.16915	3.10574e-16	1.9832e-14	RPL3P4	NA	3.44737e-14	918	717	848	307	321	259
5633	ENSG00000228288	23.1205	-1.48303	0.523205	-2.83451	0.00458965	0.014464	PCAT6	100506696	0.0251425	24	27	51	19	9	9
14518	ENSG00000231566	1.57821	-1.48301	1.6993	-0.872716	0.382818	NA	RP5-1158E12.3	401585	0.813679	1	5	1	2	0	1
99	ENSG00000184076	1154.15	-1.48296	0.160838	-9.22019	2.96573e-20	5.31794e-18	UQCR10	29796	9.24408e-18	1777	1627	1697	685	604	535
420	ENSG00000078808	1099.81	-1.48289	0.194967	-7.60587	2.8299e-14	1.1961e-12	SDF4	51150	2.07917e-12	1560	1680	1621	744	503	491
2907	ENSG00000230663	46.5805	-1.481	0.348078	-4.25479	2.09246e-05	0.000127779	FAM224B	NA	0.000222117	62	60	83	30	20	23
14378	ENSG00000214184	1.55947	-1.48073	1.66809	-0.887676	0.374715	NA	GCC2-AS1	644903	0.804211	1	2	3	2	1	0
10060	ENSG00000271737	5.22947	-1.48071	0.959176	-1.54373	0.122653	0.222199	CTB-113I20.2	NA	0.376225	7	12	5	5	3	1
14920	ENSG00000225558	1.55633	-1.48063	1.80017	-0.822495	0.410795	NA	UBE2D3P2	NA	0.849618	5	2	0	2	1	0
11295	ENSG00000264049	4.18986	-1.48034	1.12368	-1.3174	0.187703	0.307986	MIR4737	100616210	0.512805	2	9	7	3	3	0
16115	ENSG00000213145	1.04799	-1.47892	2.09093	-0.707304	0.479378	NA	CRIP1	1396	0.917828	0	2	2	1	1	0
16116	ENSG00000234937	1.04799	-1.47892	2.09093	-0.707304	0.479378	NA	RP11-101O6.2	NA	0.917828	0	2	2	1	1	0
16117	ENSG00000250822	1.04799	-1.47892	2.09093	-0.707304	0.479378	NA	CTD-2139B15.4	401177	0.917828	0	2	2	1	1	0
593	ENSG00000117410	783.621	-1.47831	0.209707	-7.04939	1.79702e-12	5.37955e-11	ATP6V0B	533	9.35118e-11	987	1092	1381	517	363	361
3721	ENSG00000169169	40.0662	-1.47828	0.391831	-3.77275	0.000161457	0.000770273	CPT1C	126129	0.00133895	49	48	80	28	18	18
471	ENSG00000184924	199.286	-1.47768	0.199318	-7.41367	1.22854e-13	4.63038e-12	PTRHD1	391356	8.04891e-12	273	289	317	103	103	110
174	ENSG00000178719	1467.1	-1.47747	0.170876	-8.64642	5.31419e-18	5.42169e-16	GRINA	2907	9.42444e-16	2306	2176	1995	911	676	739
439	ENSG00000188191	341.619	-1.47729	0.196155	-7.53125	5.02578e-14	2.03229e-12	PRKAR1B	5575	3.5327e-12	574	440	494	202	181	158
4293	ENSG00000106927	34.3094	-1.47715	0.426557	-3.46295	0.000534283	0.00220931	AMBP	259	0.00384041	33	61	57	12	19	24
3354	ENSG00000107821	92.367	-1.477	0.372527	-3.9648	7.34577e-05	0.000388796	KAZALD1	81621	0.000675837	66	162	180	54	34	58
11271	ENSG00000188765	3.66338	-1.47647	1.11555	-1.32353	0.185658	0.305252	TMSB4XP2	NA	0.508299	6	8	2	3	2	1
1259	ENSG00000184508	104.56	-1.47646	0.254565	-5.79991	6.63486e-09	9.3552e-08	HDDC3	374659	1.6262e-07	143	151	168	67	49	50
1651	ENSG00000170604	358.175	-1.47638	0.276851	-5.33274	9.67416e-08	1.04019e-06	IRF2BP1	26145	1.80815e-06	518	536	527	291	129	147
16126	ENSG00000237804	1.0459	-1.47605	2.09179	-0.705641	0.480411	NA	HNRNPA1P39	NA	0.919162	2	2	0	1	1	0
16127	ENSG00000243886	1.0459	-1.47605	2.09179	-0.705641	0.480411	NA	RP11-575C1.1	NA	0.919162	2	2	0	1	1	0
16128	ENSG00000257114	1.0459	-1.47605	2.09179	-0.705641	0.480411	NA	RP11-25I15.3	105369739	0.919162	2	2	0	1	1	0
15738	ENSG00000223343	1.04694	-1.47562	1.97394	-0.747549	0.454732	NA	RP13-131K19.2	NA	0.891608	1	2	1	1	1	0
14347	ENSG00000099953	2.07227	-1.47519	1.65062	-0.893721	0.371471	NA	MMP11	4320	0.798935	7	2	0	2	0	1
20	ENSG00000185624	10971.5	-1.47466	0.137398	-10.7328	7.14092e-27	6.33828e-24	P4HB	5034	1.10177e-23	16383	16288	15740	6225	5836	5358
1951	ENSG00000158104	190.549	-1.47442	0.293619	-5.02152	5.12633e-07	4.66441e-06	HPD	3242	8.10806e-06	216	272	354	110	61	131
14927	ENSG00000199568	1.58135	-1.47438	1.79487	-0.82144	0.411396	NA	RNU5A-1	26831	0.850427	2	5	0	1	2	0
5324	ENSG00000223797	21.7477	-1.47412	0.497276	-2.96439	0.00303286	0.0101126	ENTPD3-AS1	285266	0.0175785	18	41	37	12	10	12
15272	ENSG00000242445	1.54867	-1.47405	1.84596	-0.798525	0.424566	NA	RPL7AP11	NA	0.857861	6	1	0	2	1	0
13234	ENSG00000250548	2.10705	-1.47401	1.43123	-1.02989	0.303063	NA	RP11-47I22.2	101927780	0.706658	1	6	2	2	1	1
1774	ENSG00000186907	1279.34	-1.4739	0.283692	-5.19543	2.04243e-07	2.04381e-06	RTN4RL2	349667	3.55272e-06	2129	1613	1903	1070	511	450
860	ENSG00000014216	2018.25	-1.47357	0.227677	-6.47217	9.66081e-11	1.99417e-09	CAPN1	823	3.46643e-09	3791	2635	2478	1308	1104	794
1469	ENSG00000198892	78.8035	-1.47344	0.267137	-5.51566	3.4747e-08	4.19896e-07	SHISA4	149345	7.29899e-07	117	115	116	44	44	37
14578	ENSG00000272717	1.54972	-1.47268	1.70429	-0.864102	0.387532	NA	RP11-342I1.2	NA	0.820309	5	1	1	2	1	0
2333	ENSG00000007520	275.942	-1.47251	0.315399	-4.66874	3.03054e-06	2.30567e-05	TSR3	115939	4.0079e-05	455	392	371	241	105	92
25	ENSG00000163191	5720.75	-1.47189	0.138892	-10.5974	3.06354e-26	2.172e-23	S100A11	6282	3.77555e-23	8801	8624	7804	3150	3067	2878
12255	ENSG00000159674	2.61087	-1.47183	1.26246	-1.16584	0.243678	0.376111	SPON2	10417	0.613566	3	5	3	2	1	1
11774	ENSG00000254973	3.11469	-1.47132	1.181	-1.24582	0.212829	0.339334	RP11-429J17.7	NA	0.557796	6	4	5	3	1	1
1591	ENSG00000133027	180.521	-1.47099	0.27251	-5.39794	6.74118e-08	7.52165e-07	PEMT	10400	1.30748e-06	293	256	248	138	69	80
845	ENSG00000168765	419.183	-1.4709	0.226681	-6.48885	8.64946e-11	1.8171e-09	GSTM4	2948	3.15864e-09	473	725	650	198	193	276
16195	ENSG00000129993	1.05906	-1.47086	2.11155	-0.696578	0.486067	NA	CBFA2T3	863	0.926153	1	4	0	1	0	1
658	ENSG00000161671	1030.4	-1.47023	0.213396	-6.88969	5.59141e-12	1.50849e-10	EMC10	284361	2.62218e-10	1425	1545	1573	710	397	533
16221	ENSG00000135902	1.04137	-1.47023	2.11989	-0.693538	0.487972	NA	CHRND	1144	0.928121	0	1	3	1	1	0
16222	ENSG00000260197	1.04137	-1.47023	2.11989	-0.693538	0.487972	NA	RP11-424G14.1	NA	0.928121	0	1	3	1	1	0
16223	ENSG00000260326	1.04137	-1.47023	2.11989	-0.693538	0.487972	NA	PHBP21	NA	0.928121	0	1	3	1	1	0
16224	ENSG00000271715	1.04137	-1.47023	2.11989	-0.693538	0.487972	NA	CTD-2256P15.5	NA	0.928121	0	1	3	1	1	0
2035	ENSG00000119574	139.78	-1.47011	0.296713	-4.95465	7.24598e-07	6.32092e-06	ZBTB45	84878	1.09875e-05	223	192	201	112	59	51
1019	ENSG00000099834	334.913	-1.47011	0.238355	-6.16772	6.928e-10	1.20693e-08	CDHR5	53841	2.09798e-08	395	630	452	220	150	163
1116	ENSG00000169738	308.461	-1.47007	0.244609	-6.00987	1.85677e-09	2.95353e-08	DCXR	51181	5.13408e-08	455	467	438	230	136	124
178	ENSG00000231500	9335.44	-1.46994	0.170436	-8.62459	6.43251e-18	6.41517e-16	RPS18	6222	1.11514e-15	14179	11793	15184	5010	5578	4269
437	ENSG00000086548	31446.2	-1.46993	0.195021	-7.53727	4.79912e-14	1.94952e-12	CEACAM6	4680	3.38882e-12	48866	51534	38231	13006	17584	19457
5190	ENSG00000258818	28.6644	-1.46979	0.486351	-3.02209	0.00251039	0.00858661	RNASE4	6038	0.014926	22	64	41	15	11	19
597	ENSG00000104774	371.229	-1.46969	0.208631	-7.04445	1.8619e-12	5.53643e-11	MAN2B1	4125	9.62387e-11	665	472	500	207	216	167
1829	ENSG00000204922	108.329	-1.46966	0.285974	-5.13916	2.75966e-07	2.67848e-06	UQCC3	790955	4.65596e-06	154	159	164	82	44	46
5788	ENSG00000136630	16.9706	-1.46876	0.529225	-2.7753	0.00551512	0.0169151	HLX	3142	0.0294031	20	21	33	8	9	11
14457	ENSG00000198573	1.57578	-1.46777	1.66479	-0.881655	0.377964	NA	SPANXC	64663	0.806727	1	4	2	1	2	0
8994	ENSG00000218582	9.32962	-1.46746	0.821284	-1.78678	0.0739723	0.148011	GAPDHP63	NA	0.253796	16	6	19	10	1	4
512	ENSG00000183172	227.069	-1.46674	0.201598	-7.27555	3.45004e-13	1.19619e-11	SMDT1	91689	2.07932e-11	343	328	330	113	141	107
408	ENSG00000013364	2517.62	-1.4659	0.191184	-7.66749	1.75395e-14	7.6314e-13	MVP	9961	1.32655e-12	4222	3741	3128	1598	1317	1100
7868	ENSG00000180767	10.4981	-1.46589	0.700808	-2.09171	0.0364644	0.082703	CHST13	166012	0.143012	15	22	9	8	3	6
16242	ENSG00000226855	1.03823	-1.46585	2.12121	-0.691046	0.489537	NA	RPSAP17	NA	0.930066	3	1	0	1	1	0
15804	ENSG00000159871	1.03928	-1.46572	1.9766	-0.741536	0.458369	NA	LYPD5	284348	0.894907	2	1	1	1	1	0
15805	ENSG00000253606	1.03928	-1.46572	1.9766	-0.741536	0.458369	NA	AFG3L2P1	NA	0.894907	2	1	1	1	1	0
765	ENSG00000178449	331.807	-1.46501	0.22099	-6.62928	3.37322e-11	7.82763e-10	COX14	84987	1.36066e-09	381	475	606	185	153	191
13480	ENSG00000198835	2.12336	-1.46468	1.47023	-0.996226	0.31914	NA	GJC2	57165	0.729914	1	7	1	1	2	1
11059	ENSG00000011201	3.68066	-1.46397	1.07467	-1.36225	0.173119	0.289108	ANOS1	3730	0.483056	3	8	5	2	2	2
8626	ENSG00000128218	8.33916	-1.46386	0.778858	-1.8795	0.0601766	0.125147	VPREB3	29802	0.215271	15	11	11	6	7	1
294	ENSG00000116586	385.186	-1.46327	0.181344	-8.06903	7.08579e-16	4.27847e-14	LAMTOR2	28956	7.43719e-14	516	560	621	228	196	191
16164	ENSG00000009790	1.05349	-1.46312	2.08764	-0.700845	0.4834	NA	TRAF3IP3	80342	0.922667	0	2	2	1	0	1
16165	ENSG00000167766	1.05349	-1.46312	2.08764	-0.700845	0.4834	NA	ZNF83	55769	0.922667	0	2	2	1	0	1
16166	ENSG00000205361	1.05349	-1.46312	2.08764	-0.700845	0.4834	NA	MT1DP	NA	0.922667	0	2	2	1	0	1
16167	ENSG00000226309	1.05349	-1.46312	2.08764	-0.700845	0.4834	NA	SMARCE1P2	NA	0.922667	0	2	2	1	0	1
1413	ENSG00000053501	83.6862	-1.46256	0.261639	-5.59	2.27073e-08	2.8528e-07	USE1	55850	4.95897e-07	117	122	130	48	41	45
15808	ENSG00000149926	1.05244	-1.46113	1.97085	-0.741368	0.45847	NA	FAM57B	83723	0.894907	1	2	1	1	0	1
9927	ENSG00000217027	5.22578	-1.46098	0.926875	-1.57624	0.114971	0.211018	TPT1P4	NA	0.357386	5	7	11	4	2	3
5544	ENSG00000006606	33.0232	-1.46096	0.509186	-2.8692	0.00411506	0.0131765	CCL26	10344	0.0229045	85	28	32	17	25	11
3844	ENSG00000280071	54.3295	-1.4607	0.395656	-3.69184	0.00022264	0.00102818	CH507-9B2.3	102724023	0.00178726	71	76	92	48	20	18
829	ENSG00000169976	672.373	-1.4605	0.22428	-6.51192	7.41948e-11	1.58879e-09	SF3B5	83443	2.76177e-09	1057	934	968	491	290	294
16177	ENSG00000272024	1.05139	-1.46024	2.08849	-0.699182	0.484438	NA	RP11-546K22.3	NA	0.924077	2	2	0	1	0	1
649	ENSG00000169020	395.039	-1.46022	0.211239	-6.91266	4.7566e-12	1.30107e-10	ATP5I	521	2.26162e-10	481	580	678	199	180	253
14491	ENSG00000215553	1.56707	-1.46001	1.66611	-0.876297	0.380868	NA	KRT18P3	NA	0.811028	3	2	1	1	2	0
8366	ENSG00000260081	7.82236	-1.45971	0.749232	-1.94828	0.0513817	0.109895	RP11-66N11.8	105373383	0.189522	14	9	11	6	4	3
920	ENSG00000123933	303.064	-1.459	0.229367	-6.361	2.00451e-10	3.86783e-09	MXD4	100616358	6.72338e-09	521	398	415	203	158	123
15080	ENSG00000255587	1.55069	-1.45879	1.80096	-0.81001	0.417935	NA	RAB44	401258	0.855214	2	0	5	2	0	1
16204	ENSG00000133958	1.03266	-1.45799	2.09729	-0.69518	0.486943	NA	UNC79	57578	0.927045	2	0	2	1	1	0
16205	ENSG00000145103	1.03266	-1.45799	2.09729	-0.69518	0.486943	NA	ILDR1	286676	0.927045	2	0	2	1	1	0
16206	ENSG00000213307	1.03266	-1.45799	2.09729	-0.69518	0.486943	NA	RPL18P11	NA	0.927045	2	0	2	1	1	0
16207	ENSG00000220793	1.03266	-1.45799	2.09729	-0.69518	0.486943	NA	RPL21P119	NA	0.927045	2	0	2	1	1	0
16208	ENSG00000263627	1.03266	-1.45799	2.09729	-0.69518	0.486943	NA	PPP4R1-AS1	101927323	0.927045	2	0	2	1	1	0
13559	ENSG00000151882	2.09931	-1.45789	1.47633	-0.987512	0.323392	NA	CCL28	56477	0.735985	1	4	5	2	0	2
14131	ENSG00000176884	1.58128	-1.4574	1.59029	-0.916435	0.359439	NA	GRIN1	2902	0.784898	1	4	2	1	1	1
2151	ENSG00000179271	259.334	-1.45736	0.301315	-4.83665	1.32045e-06	1.08976e-05	GADD45GIP1	90480	1.8943e-05	356	375	410	222	98	95
16911	ENSG00000279193	1.06325	-1.45733	2.26142	-0.644433	0.519294	NA	RP11-143E21.2	NA	0.940998	1	4	0	0	2	0
16912	ENSG00000283051	1.06325	-1.45733	2.26142	-0.644433	0.519294	NA	KB-51A8.1	101928311	0.940998	1	4	0	0	2	0
1601	ENSG00000093010	482.006	-1.45717	0.270426	-5.38843	7.10749e-08	7.88083e-07	COMT	100616414	1.36991e-06	903	545	672	340	266	165
861	ENSG00000131408	650.973	-1.45684	0.22516	-6.47023	9.78521e-11	2.0175e-09	NR1H2	7376	3.50699e-09	1082	929	852	467	305	271
165	ENSG00000164587	7638.87	-1.45671	0.166947	-8.72559	2.64785e-18	2.84876e-16	RPS14	6208	4.95196e-16	11078	9674	12842	4462	4137	3640
16287	ENSG00000179178	1.03161	-1.4567	2.12402	-0.685824	0.492824	NA	TMEM125	128218	0.933666	3	0	1	1	1	0
16288	ENSG00000255734	1.03161	-1.4567	2.12402	-0.685824	0.492824	NA	HNRNPABP1	NA	0.933666	3	0	1	1	1	0
1832	ENSG00000064490	106.722	-1.45665	0.283531	-5.13754	2.78361e-07	2.6973e-06	RFXANK	8625	4.68867e-06	182	115	173	68	45	58
3520	ENSG00000183628	37.082	-1.45624	0.375007	-3.88324	0.000103075	0.000519827	DGCR6	8214	0.000903606	60	45	58	24	20	16
141	ENSG00000145592	7274.44	-1.45624	0.162816	-8.94403	3.75217e-19	4.724e-17	RPL37	6167	8.21165e-17	11277	9970	10742	4454	3908	3295
13333	ENSG00000183971	2.07953	-1.45577	1.43289	-1.01597	0.309644	NA	NPW	283869	0.716512	2	1	6	2	1	1
13334	ENSG00000251062	2.07953	-1.45577	1.43289	-1.01597	0.309644	NA	CTD-2218G20.1	NA	0.716512	2	1	6	2	1	1
13335	ENSG00000254331	2.07953	-1.45577	1.43289	-1.01597	0.309644	NA	CKS1BP7	NA	0.716512	2	1	6	2	1	1
3785	ENSG00000148803	32.9577	-1.45561	0.390609	-3.72651	0.000194147	0.000910569	FUOM	282969	0.00158283	54	46	44	19	20	13
309	ENSG00000167114	482.694	-1.4552	0.182122	-7.99026	1.34651e-15	7.73565e-14	SLC27A4	10999	1.34468e-13	728	686	708	306	227	240
1204	ENSG00000179913	304.311	-1.45519	0.247233	-5.88591	3.95864e-09	5.83669e-08	B3GNT3	10331	1.01458e-07	574	433	331	174	187	127
388	ENSG00000169223	2498.36	-1.4544	0.18757	-7.75391	8.91057e-15	4.07682e-13	LMAN2	10960	7.08666e-13	3771	3674	3539	1699	1165	1143
911	ENSG00000233954	262.793	-1.45438	0.228068	-6.37696	1.80637e-10	3.51994e-09	UQCRHL	440567	6.11865e-09	380	369	406	186	113	122
813	ENSG00000126458	360.363	-1.45412	0.222216	-6.54373	6.00044e-11	1.31021e-09	RRAS	6237	2.27751e-09	580	503	502	245	190	142
994	ENSG00000166033	541.267	-1.45408	0.234027	-6.21332	5.18769e-10	9.26477e-09	HTRA1	5654	1.61048e-08	571	890	918	257	250	361
12349	ENSG00000270761	2.60732	-1.45397	1.2605	-1.15348	0.248713	0.38154	RP11-385F7.1	NA	0.621398	3	2	6	2	2	1
13563	ENSG00000188672	2.07534	-1.45312	1.47362	-0.986089	0.32409	NA	RHCE	6006	0.737356	7	1	1	2	1	1
411	ENSG00000095321	535.108	-1.45291	0.189764	-7.65641	1.9121e-14	8.25877e-13	CRAT	1384	1.43561e-12	815	839	698	339	242	278
5603	ENSG00000262246	19.3557	-1.45268	0.510912	-2.84331	0.00446474	0.0141457	CORO7	79585	0.0245891	39	26	21	10	13	8
15878	ENSG00000220378	1.04582	-1.45258	1.97313	-0.736181	0.46162	NA	KRT8P42	NA	0.89702	1	1	2	1	0	1
15879	ENSG00000249375	1.04582	-1.45258	1.97313	-0.736181	0.46162	NA	CASC11	100270680	0.89702	1	1	2	1	0	1
15880	ENSG00000272256	1.04582	-1.45258	1.97313	-0.736181	0.46162	NA	RP11-489E7.4	NA	0.89702	1	1	2	1	0	1
1322	ENSG00000186792	100.206	-1.45231	0.254417	-5.70838	1.14053e-08	1.53152e-07	HYAL3	8372	2.66222e-07	155	132	153	63	50	48
3008	ENSG00000101084	258.303	-1.45224	0.346682	-4.18897	2.80222e-05	0.000165376	C20orf24	55969	0.00028747	391	349	395	244	95	76
15888	ENSG00000237594	1.04477	-1.45121	1.9735	-0.735351	0.462125	NA	AP000251.3	NA	0.89755	2	1	1	1	0	1
14083	ENSG00000254349	1.57361	-1.4509	1.57061	-0.923783	0.3556	NA	MIR2052HG	441355	0.779125	2	2	2	1	1	1
16993	ENSG00000109163	1.07641	-1.4508	2.293	-0.63271	0.526923	NA	GNRHR	2798	0.940998	0	5	0	0	1	1
7515	ENSG00000149260	383.051	-1.44917	0.661993	-2.18911	0.0285891	0.0677679	CAPN5	726	0.117392	226	770	687	134	142	340
12508	ENSG00000217275	2.61386	-1.44857	1.28103	-1.13079	0.258145	0.391996	RP1-34B20.4	NA	0.63679	2	2	7	2	1	2
7971	ENSG00000278922	11.2576	-1.44855	0.704199	-2.05702	0.0396843	0.088848	AC002310.14	NA	0.153629	12	18	19	12	3	3
15042	ENSG00000246548	1.58547	-1.44851	1.78179	-0.812953	0.416245	NA	RP11-7F17.5	283575	0.853737	1	4	2	0	3	0
527	ENSG00000130175	2600.84	-1.44843	0.200881	-7.21041	5.57821e-13	1.87825e-11	PRKCSH	5589	3.26492e-11	4146	4034	3241	1783	1210	1192
16216	ENSG00000214144	1.05663	-1.44832	2.08553	-0.694463	0.487392	NA	RP11-488L18.1	NA	0.927475	1	2	1	0	2	0
927	ENSG00000178464	988.64	-1.44816	0.228342	-6.34208	2.26678e-10	4.34087e-09	RPL10P16	NA	7.54565e-09	1668	1319	1355	687	537	367
15048	ENSG00000228792	1.58782	-1.44772	1.78132	-0.812721	0.416378	NA	RP11-354K1.2	NA	0.85384	0	4	3	1	0	2
13276	ENSG00000273080	2.11352	-1.44684	1.41374	-1.02342	0.306111	NA	RP11-301O19.1	NA	0.711509	3	5	1	1	1	2
10106	ENSG00000213683	4.70656	-1.44666	0.942452	-1.53499	0.124786	0.22503	AC002056.3	NA	0.381025	8	5	8	2	3	3
721	ENSG00000074071	1045.53	-1.44635	0.214697	-6.73669	1.62031e-11	3.98943e-10	MRPS34	65993	6.93475e-10	1579	1565	1445	756	490	438
16893	ENSG00000275409	1.05559	-1.44634	2.23671	-0.646635	0.517868	NA	RP11-131L12.4	NA	0.940998	2	2	0	0	2	0
1736	ENSG00000121680	149.241	-1.44533	0.275637	-5.2436	1.57474e-07	1.6103e-06	PEX16	9409	2.79915e-06	239	191	225	110	76	54
1399	ENSG00000003249	414.548	-1.44522	0.257569	-5.61098	2.01182e-08	2.55281e-07	DBNDD1	79007	4.4375e-07	727	600	493	300	218	150
1812	ENSG00000064787	324.476	-1.44498	0.280713	-5.14754	2.63922e-07	2.58562e-06	BCAS1	8537	4.49454e-06	619	377	428	137	251	134
15136	ENSG00000079393	1.59863	-1.4445	1.79094	-0.806561	0.419919	NA	DUSP13	51207	0.855533	0	5	2	0	2	1
6645	ENSG00000234782	17.38	-1.44422	0.586068	-2.46426	0.0137296	0.036717	TPT1P9	NA	0.0637573	23	31	23	4	17	7
13209	ENSG00000264215	2.6028	-1.4438	1.39748	-1.03314	0.301539	0.440841	RP11-283C24.1	NA	0.704411	6	1	5	1	3	0
1075	ENSG00000141524	127.316	-1.44358	0.236897	-6.09371	1.10323e-09	1.82181e-08	TMC6	11322	3.16683e-08	171	192	195	81	61	63
16313	ENSG00000254270	1.0392	-1.44351	2.11977	-0.680977	0.495886	NA	ERHP1	NA	0.934765	1	0	3	1	0	1
16291	ENSG00000255647	1.06979	-1.44278	2.1054	-0.685276	0.49317	NA	CTD-2373J6.2	731157	0.934149	0	4	1	0	1	1
16254	ENSG00000258734	1.03816	-1.44214	2.09395	-0.688717	0.491001	NA	RP11-112J1.3	NA	0.932081	2	0	2	1	0	1
3169	ENSG00000165886	80.856	-1.44205	0.352973	-4.08545	4.39912e-05	0.000246429	UBTD1	80019	0.000428363	166	98	91	63	37	30
622	ENSG00000212802	2136.48	-1.442	0.207063	-6.9641	3.30516e-12	9.43298e-11	RPL15P3	NA	1.63972e-10	3453	2654	3264	1483	1040	926
3380	ENSG00000008382	46.9911	-1.44183	0.364912	-3.95118	7.7767e-05	0.000408438	MPND	84954	0.00070998	75	76	56	36	20	19
14934	ENSG00000267686	1.57781	-1.44146	1.75688	-0.820464	0.411952	NA	RP11-795H16.3	NA	0.851212	2	2	2	0	3	0
6795	ENSG00000236824	25.9303	-1.4412	0.59774	-2.41108	0.0159053	0.0416018	BCYRN1	618	0.0722306	26	33	55	29	4	9
6535	ENSG00000185834	18.6736	-1.44088	0.576054	-2.50129	0.0123741	0.0336444	RPL12P4	NA	0.0584298	29	33	19	10	17	4
14475	ENSG00000236992	1.57911	-1.44085	1.63991	-0.878615	0.37961	NA	RPL12P12	NA	0.809202	2	2	2	1	0	2
14476	ENSG00000243766	1.57911	-1.44085	1.63991	-0.878615	0.37961	NA	HOTTIP	NA	0.809202	2	2	2	1	0	2
2497	ENSG00000128242	432.61	-1.44073	0.31695	-4.5456	5.47783e-06	3.89437e-05	GAL3ST1	9514	6.76951e-05	886	525	486	352	205	141
16325	ENSG00000255562	1.03711	-1.44058	2.12065	-0.679309	0.496942	NA	UNC93B6	NA	0.934765	3	0	1	1	0	1
657	ENSG00000170889	4582.3	-1.44053	0.208935	-6.89461	5.40111e-12	1.45937e-10	RPS9	6203	2.5368e-10	7826	5798	6468	3170	2292	1940
12304	ENSG00000169668	2.62808	-1.44028	1.24362	-1.15814	0.246809	0.379634	BCRP2	NA	0.618988	5	4	3	1	2	2
16976	ENSG00000246528	1.05106	-1.4397	2.26743	-0.634951	0.52546	NA	RP11-159H10.3	101929759	0.940998	0	1	3	0	2	0
11885	ENSG00000224616	3.13844	-1.43941	1.17007	-1.2302	0.218622	0.346089	RTCA-AS1	NA	0.567587	6	2	6	2	1	3
14896	ENSG00000232907	1.56142	-1.4394	1.7418	-0.826386	0.408585	NA	DLGAP4-AS1	101926987	0.846353	1	0	6	1	1	1
14897	ENSG00000259083	1.56142	-1.4394	1.7418	-0.826386	0.408585	NA	RP11-407N17.4	NA	0.846353	1	0	6	1	1	1
16250	ENSG00000216906	1.05001	-1.43929	2.08822	-0.689242	0.490671	NA	RP11-350J20.9	NA	0.931762	1	1	2	0	2	0
6760	ENSG00000167701	17.9309	-1.43881	0.593898	-2.42265	0.0154076	0.040509	GPT	2875	0.0703327	12	30	37	6	7	16
3686	ENSG00000130748	93.8937	-1.43879	0.379403	-3.79224	0.000149296	0.000719019	TMEM160	54958	0.00124986	164	132	115	88	32	31
100	ENSG00000114779	635.644	-1.43861	0.156172	-9.21171	3.20957e-20	5.69762e-18	ABHD14B	84836	9.90408e-18	904	976	906	357	324	347
104	ENSG00000137207	649.923	-1.43832	0.156644	-9.18211	4.22719e-20	7.21549e-18	YIPF3	25844	1.25426e-17	935	903	1011	366	336	349
14203	ENSG00000177519	2.10003	-1.43826	1.59205	-0.903403	0.366312	NA	RPRM	56475	0.7953	2	2	5	0	3	0
1012	ENSG00000132470	3130.67	-1.43803	0.232837	-6.17609	6.57082e-10	1.15262e-08	ITGB4	3691	2.00358e-08	6126	3781	3814	2110	1593	1361
750	ENSG00000131174	3642.12	-1.4379	0.215956	-6.65829	2.77025e-11	6.55699e-10	COX7B	1349	1.13979e-09	3810	5236	6915	1910	1798	2183
16259	ENSG00000167759	1.04897	-1.43784	2.08865	-0.688407	0.491196	NA	KLK13	26085	0.932081	2	1	1	0	2	0
16260	ENSG00000257408	1.04897	-1.43784	2.08865	-0.688407	0.491196	NA	RP11-645C24.4	NA	0.932081	2	1	1	0	2	0
16261	ENSG00000258806	1.04897	-1.43784	2.08865	-0.688407	0.491196	NA	OR11H7	NA	0.932081	2	1	1	0	2	0
13228	ENSG00000273010	2.09924	-1.43775	1.39478	-1.03081	0.302632	NA	RP11-96K19.5	NA	0.705974	5	2	2	1	1	2
12398	ENSG00000274315	2.62146	-1.43669	1.25374	-1.14592	0.251827	0.384984	RP11-996F15.5	NA	0.626784	5	2	5	1	2	2
1162	ENSG00000100258	537.013	-1.43644	0.24177	-5.94135	2.8269e-09	4.31869e-08	LMF2	91289	7.5071e-08	916	725	713	402	251	216
8491	ENSG00000176919	9.7898	-1.43636	0.749114	-1.91742	0.0551851	0.11643	C8G	733	0.200554	6	24	14	8	3	4
13853	ENSG00000260433	2.11319	-1.43632	1.49799	-0.958836	0.337642	NA	RP11-202D1.2	101928167	0.752107	1	4	5	0	3	1
2391	ENSG00000196976	210.544	-1.43538	0.309721	-4.63442	3.57942e-06	2.65754e-05	LAGE3	8270	4.61956e-05	280	346	297	179	66	96
14723	ENSG00000254604	1.57354	-1.43521	1.69888	-0.844796	0.398225	NA	AP000487.6	NA	0.834641	1	1	5	1	0	2
94	ENSG00000235174	5460.44	-1.43513	0.154644	-9.28023	1.69107e-20	3.19361e-18	RPL39P3	NA	5.55139e-18	7744	7364	8810	2779	3289	2777
6498	ENSG00000214401	14.4546	-1.43432	0.570774	-2.51294	0.0119728	0.032739	KANSL1-AS1	107984142	0.0568571	16	21	26	10	6	7
15933	ENSG00000228126	1.06213	-1.43428	1.96545	-0.729749	0.465544	NA	FALEC	100874054	0.90149	1	2	1	0	1	1
15934	ENSG00000269976	1.06213	-1.43428	1.96545	-0.729749	0.465544	NA	RP11-130L8.2	NA	0.90149	1	2	1	0	1	1
15197	ENSG00000235698	1.57014	-1.43403	1.78475	-0.803489	0.421692	NA	PA2G4P2	NA	0.855533	3	1	2	0	3	0
13361	ENSG00000258713	2.09367	-1.43381	1.4149	-1.01336	0.310886	NA	C20orf141	128653	0.717979	3	1	5	1	1	2
14587	ENSG00000237980	1.58435	-1.43291	1.66237	-0.861969	0.388705	NA	RP11-338C15.3	NA	0.82218	1	2	3	0	2	1
6376	ENSG00000101342	14.9504	-1.43193	0.559015	-2.56153	0.0104213	0.0290421	TLDC2	140711	0.0504359	22	18	26	10	9	5
12994	ENSG00000214870	2.6301	-1.43063	1.34228	-1.06582	0.286504	0.424719	AC004540.5	NA	0.680386	1	2	8	1	1	3
2064	ENSG00000183828	99.5265	-1.4306	0.290123	-4.93102	8.18024e-07	7.03564e-06	NUDT14	256281	1.22299e-05	152	131	153	75	45	41
834	ENSG00000197982	264.454	-1.42981	0.21992	-6.50152	7.95124e-11	1.69143e-09	C1orf122	127687	2.94019e-09	432	368	357	181	126	122
1472	ENSG00000179967	419.338	-1.42967	0.259497	-5.50939	3.60079e-08	4.34248e-07	PPP1R14BP3	NA	7.54846e-07	584	672	579	335	168	178
2988	ENSG00000174939	285.678	-1.42868	0.340347	-4.19771	2.69623e-05	0.000160186	ASPHD1	253982	0.000278448	577	329	343	229	158	76
6310	ENSG00000228007	14.9909	-1.4282	0.55279	-2.58361	0.00977713	0.0275148	AC011933.2	NA	0.0478134	26	21	18	8	10	6
638	ENSG00000126062	247.288	-1.42752	0.205804	-6.93635	4.02366e-12	1.11956e-10	TMEM115	11070	1.94611e-10	393	351	339	152	140	110
15230	ENSG00000215110	1.59751	-1.42726	1.77913	-0.802221	0.422425	NA	UGT2B25P	NA	0.855533	0	4	3	0	1	2
16971	ENSG00000224727	1.04235	-1.42722	2.24327	-0.636222	0.524632	NA	FCF1P7	NA	0.940998	2	0	2	0	2	0
15972	ENSG00000112499	1.05551	-1.42571	1.9677	-0.724557	0.468724	NA	SLC22A2	6582	0.905211	1	1	2	0	1	1
15973	ENSG00000139567	1.05551	-1.42571	1.9677	-0.724557	0.468724	NA	ACVRL1	94	0.905211	1	1	2	0	1	1
15974	ENSG00000228051	1.05551	-1.42571	1.9677	-0.724557	0.468724	NA	RP11-325E14.2	NA	0.905211	1	1	2	0	1	1
15975	ENSG00000236852	1.05551	-1.42571	1.9677	-0.724557	0.468724	NA	RP11-3D23.1	NA	0.905211	1	1	2	0	1	1
15976	ENSG00000262445	1.05551	-1.42571	1.9677	-0.724557	0.468724	NA	CTD-2545H1.2	NA	0.905211	1	1	2	0	1	1
2105	ENSG00000123810	84.8478	-1.42541	0.291572	-4.8887	1.01505e-06	8.56018e-06	B9D2	80776	1.488e-05	113	133	124	60	32	46
414	ENSG00000164054	994.652	-1.42507	0.186325	-7.6483	2.03655e-14	8.73255e-13	SHISA5	51246	1.51796e-12	1584	1496	1270	649	505	465
16367	ENSG00000238078	1.05656	-1.42454	2.11076	-0.674895	0.499743	NA	LINC01352	101929730	0.934765	0	1	3	0	1	1
15985	ENSG00000169427	1.05446	-1.42434	1.96806	-0.723726	0.469234	NA	KCNK9	51305	0.905731	2	1	1	0	1	1
15986	ENSG00000259075	1.05446	-1.42434	1.96806	-0.723726	0.469234	NA	POC1B-GALNT4	100528030	0.905731	2	1	1	0	1	1
1869	ENSG00000183779	173.566	-1.4243	0.279122	-5.10278	3.34694e-07	3.17897e-06	ZNF703	80139	5.52595e-06	296	234	229	132	89	62
[truncated: 56,736 more rows]
